# Supplementary material for: Decapping activators Edc3 and Scd6 act redundantly with Dhh1 in post-transcriptional repression of starvation-induced pathways
Source: eLife. 2025 Nov 25;13:RP102287. doi: 10.7554/eLife.102287 (PMC12646578; doi:10.7554/eLife.102287)
Supplement: Figure 3—source data 1. — Sheets 1–2 labeled ‘Relative occs._replicates’ and ‘Relative occs._ Reps._averaged’ contain the processed data from ChIP-Seq analysis of Rpb1 in three biological replicates of wild-type (WT) and scd6∆edc3∆ strains and the averaged data from combining the replicates, respectively, listing the relative occupancies averaged over the coding sequences for each expressed gene normalized to the average occupancy on each chromosome. Sheet ‘S. pombe norm. factor calcs,’ lists the calculations of normalization factors obtained from total numbers of reads aligned to the S. pombe genome for each chromatin sample spiked-in with equal aliquots of S. pombe chromatin prior to immunoprecipitation with Rpb1 antibodies. Factors are calculated for each individual replicate (col. E) or for the combined replicates for each strain (col. G). Sheets ‘Normalized occs._replicates’ and ‘Normalized occs._reps._avged’ list the spike-in normalized Rpb1 occupancies calculated for each replicate or the combined replicates for each strain, respectively, calculated using the respective normalization factors for individual or combined replicates determined in the previous two sheets. [file elife-102287-fig3-data1.xlsx]

## Sheet: Notes
Sheets 1-2 labeled "Relative occs._replicates” and “Relative occs._ Reps._averaged” contain the processed data from ChIP-Seq analysis of Rpb1 in three biological replicates of WT and scd6∆edc3∆ strains and the averaged data from combining the replicates, respectively, listing the relative occupancies averaged over the coding sequences for each expressed gene normalized to the average occupancy on…

## Sheet: Relative occs._replicates
Relative Rpb1 occupancies
Gene	WT-1	WT-2	WT-3	s6e3-1	s6e3-2	s6e3-3
YAL068C	0.279846	0.364136	0.294629	0.350407	0.270696	0.344409
YAL067C	0.324061	0.284664	0.285874	0.234385	0.250018	0.276918
YAL064W	0.351022	0.330876	0.324641	0.271175	0.328553	0.370419
YAL063C	0.446497	0.486918	0.516991	0.518306	0.470054	0.48248
YAL062W	0.81651	0.920407	0.889684	0.851618	0.824331	0.844929
YAL060W	1.50831	1.55012	1.66916	1.92514	1.75754	1.95398
YAL059W	1.41451	1.25876	1.07941	1.00552	1.07042	0.950255
YAL058W	0.603314	0.630636	0.659837	0.59352	0.588988	0.602063
YAL056W	0.820439	0.841796	0.780615	0.841729	0.853799	0.867211
YAL055W	0.690779	0.706159	0.77154	0.758394	0.687247	0.720212
YAL054C	0.506749	0.573944	0.568215	0.64007	0.606478	0.64612
YAL053W	0.984879	0.978323	1.01814	2.03745	1.94091	1.86655
YAL051W	0.675622	0.638157	0.60622	0.63878	0.654275	0.656595
YAL049C	0.928083	0.957671	0.888121	0.954703	0.95359	0.969959
YAL048C	0.58261	0.621141	0.618695	0.651502	0.66896	0.687
YAL047C	0.460555	0.455933	0.443836	0.432972	0.462241	0.48625
YAL046C	0.694894	0.848004	0.889025	0.947743	0.900102	0.900385
YAL044C	0.97833	1.14517	1.08593	1.43209	1.29186	1.32211
YAL043C	0.958359	1.11127	1.18185	1.18375	1.07358	1.04951
YAL042W	1.38552	1.52402	1.6239	1.45018	1.30068	1.31646
YAL041W	1.17001	1.15342	1.08788	1.13288	1.20924	1.15982
YAL040C	2.99185	3.03116	3.08109	3.59134	3.49777	3.44849
YAL039C	1.43783	1.70269	1.82112	1.90981	1.60113	1.76939
YAL038W	16.1934	16.4164	18.5091	15.7355	14.1446	13.1449
YAL036C	1.7231	1.71013	1.719	1.45313	1.40813	1.26902
YAL035W	1.99704	2.0764	2.00293	2.15933	2.06004	1.95672
YAL034W-A	0.858227	0.834024	0.832548	0.833671	0.855182	0.882493
YAL034C	0.809914	0.842411	0.802854	1.10835	1.07459	1.17269
YAL033W	1.06489	1.04137	1.02815	0.994684	0.954514	0.975565
YAL032C	0.986012	1.11188	1.12729	1.06141	0.998403	1.00674
YAL031C	0.612269	0.607238	0.592775	0.649838	0.654512	0.678389
YAL030W	1.06924	1.13003	1.21359	1.0809	1.04391	1.02529
YAL029C	0.93397	0.917887	0.84081	0.902231	0.918547	0.918063
YAL028W	0.417379	0.442762	0.461514	0.51283	0.454655	0.518283
YAL027W	0.710821	0.69245	0.718543	0.68859	0.694728	0.716262
YAL026C	0.567708	0.577607	0.537745	0.588572	0.601084	0.619693
YAL025C	1.98441	2.06137	2.12159	1.91405	1.74135	1.53843
YAL024C	0.673344	0.663064	0.613452	0.662223	0.679933	0.702421
YAL023C	1.83896	1.96785	1.9953	1.87873	1.76564	1.70856
YAL022C	0.835618	0.965498	1.02614	1.1005	1.01321	1.01293
YAL021C	1.0255	1.11637	1.17507	1.21969	1.12563	1.14986
YAL020C	0.857514	1.02425	1.10079	0.988435	0.80428	0.81355
YAL019W	0.888696	0.915221	0.887847	0.898119	0.854503	0.842044
YAL017W	0.507289	0.51149	0.476703	0.657566	0.684489	0.758015
YAL016W	1.20673	1.14784	1.12615	1.32713	1.35612	1.41467
YAL015C	0.732628	0.775894	0.741622	0.749057	0.769001	0.739774
YAL014C	1.12997	1.22083	1.38132	1.55224	1.38551	1.44007
YAL013W	0.954266	1.11731	1.19333	1.25822	1.10764	1.15604
YAL012W	3.68918	4.08515	4.41022	4.03247	3.58764	3.51473
YAL011W	0.903434	0.93196	0.872833	0.813971	0.85148	0.855204
YAL010C	0.661512	0.612206	0.594158	0.616049	0.664428	0.693319
YAL009W	0.702422	0.668209	0.672075	0.673036	0.678211	0.744712
YAL008W	0.699572	0.714475	0.678174	0.671235	0.678444	0.717833
YAL007C	1.19217	1.1422	1.15095	1.19915	1.28169	1.26979
YAL005C	5.60511	6.21452	6.59632	5.88792	5.89268	6.79607
YAL003W	10.7939	9.84359	9.99651	9.22728	9.2657	8.53266
YAL002W	0.701764	0.659074	0.614463	0.575248	0.641894	0.652901
YAL001C	0.593919	0.585143	0.541948	0.603176	0.654614	0.661636
YAR002W	1.3269	1.27929	1.21625	1.26874	1.2952	1.26167
YAR002C-A	1.37445	1.36521	1.33017	1.42558	1.43725	1.39684
YAR003W	0.939356	0.933399	0.948343	0.999706	0.962307	0.990908
YAR007C	0.987249	0.915243	0.930712	1.00648	1.01509	1.04414
YAR008W	0.780841	0.805911	0.816692	0.749903	0.760112	0.782013
YAR014C	0.956319	1.00384	0.989706	1.13218	1.06421	1.10929
YAR015W	0.815065	0.877626	0.872594	1.07497	0.992534	1.04346
YAR018C	0.786489	0.756584	0.706016	1.0221	1.04623	1.04886
YAR019C	0.546895	0.54445	0.5183	0.621793	0.653042	0.694909
YAR020C	0.547586	0.536862	0.581883	0.62016	0.61056	0.673908
YAR027W	0.804303	0.776112	0.793205	1.09334	1.02941	1.23309
YAR031W	0.562377	0.54445	0.57569	0.558544	0.563589	0.587126
YAR033W	0.719921	0.738802	0.694542	0.675805	0.688442	0.730535
YAR035W	0.239591	0.314415	0.329419	0.300207	0.274674	0.286372
YAR042W	0.873147	0.909321	0.903075	0.93196	0.877138	0.908019
YAR050W	0.338695	0.379313	0.387994	0.336666	0.301901	0.31862
YAR071W	1.28581	1.34813	1.32257	1.32159	1.3239	1.29873
YBL108C-A	0.158826	0.19258	0.186917	0.177095	0.170067	0.218128
YBL106C	0.487602	0.512839	0.490796	0.452617	0.448321	0.47066
YBL105C	0.768141	0.830287	0.798696	0.846974	0.835498	0.843344
YBL103C	0.697487	0.737614	0.760422	0.757839	0.726382	0.773833
YBL102W	0.799897	0.841745	0.849913	0.937401	0.905145	0.932161
YBL101C	0.525742	0.587061	0.579625	0.676999	0.66646	0.692026
YBL099W	2.26374	2.46328	2.67074	2.99056	2.74796	2.85997
YBL098W	0.396339	0.429198	0.44986	0.39039	0.378589	0.404326
YBL097W	0.70425	0.718064	0.711818	0.725449	0.716805	0.715304
YBL093C	1.10156	1.12752	1.19112	1.04472	0.956318	1.00337
YBL092W	7.85161	7.20006	7.59304	7.83983	7.72628	7.2153
YBL091C-A	2.29338	2.38346	2.47391	1.91692	1.90307	1.82958
YBL091C	0.745647	0.869884	0.894476	0.852925	0.779493	0.831205
YBL090W	0.934437	0.871765	0.888872	0.79506	0.937885	0.875319
YBL089W	0.77857	0.809283	0.855764	0.741859	0.735368	0.760684
YBL088C	0.509357	0.511158	0.470311	0.45537	0.485991	0.496903
YBL087C	4.41867	4.1419	4.38395	4.28214	4.1818	3.92438
YBL085W	0.757292	0.799268	0.759774	0.832008	0.841441	0.882657
YBL084C	0.625129	0.660728	0.644804	0.692214	0.674763	0.713482
YBL082C	0.714736	0.81441	0.897787	0.78837	0.645846	0.649786
YBL080C	0.543641	0.560011	0.553783	0.542344	0.518367	0.549656
YBL079W	0.961587	0.963065	0.904596	0.878255	0.891514	0.889313
YBL078C	0.471916	0.490178	0.480222	0.683389	0.728389	0.812622
YBL076C	2.06176	2.1174	2.1041	1.99313	1.96265	1.8482
YBL075C	0.589149	0.654415	0.638636	0.646155	0.598139	0.647618
YBL074C	0.807993	0.799423	0.807881	0.819705	0.824357	0.817794
YBL072C	6.60472	6.26887	6.16433	6.52888	6.791	6.2859
YBL071W-A	1.36442	1.46523	1.54338	1.17152	1.11069	1.05687
YBL069W	1.14869	1.17538	1.1629	0.977423	0.966279	0.952596
YBL068W	0.989765	1.01065	0.96748	0.844417	0.832016	0.814368
YBL067C	0.680772	0.674166	0.627395	0.586712	0.608024	0.628
YBL066C	0.747178	0.792454	0.769226	0.894772	0.863167	0.896144
YBL064C	0.616648	0.655029	0.673407	0.930129	0.895232	1.10399
YBL063W	0.473563	0.468113	0.463942	0.482546	0.484221	0.504192
YBL061C	0.967141	0.99282	0.918107	1.28168	1.27142	1.25176
YBL060W	0.657342	0.688855	0.671059	0.776092	0.758494	0.768382
YBL059C-A	0.656533	0.687137	0.685036	0.664903	0.679315	0.729302
YBL058W	1.17386	1.30487	1.35424	1.31075	1.24247	1.31804
YBL057C	0.979643	1.05018	1.16236	1.0212	0.914644	0.897746
YBL056W	1.40514	1.52037	1.51379	1.48612	1.4376	1.46983
YBL055C	0.982273	1.0498	1.04013	0.954383	0.918721	0.866666
YBL054W	1.2479	1.25463	1.16113	1.12048	1.02044	0.876777
YBL052C	0.59271	0.550093	0.51335	0.516037	0.586201	0.579031
YBL051C	0.933914	0.965105	0.945143	1.05284	0.994554	1.02306
YBL050W	0.810633	0.80781	0.823973	0.938123	0.91465	0.999741
YBL049W	0.722232	0.806491	0.828449	0.902111	0.781743	0.873575
YBL047C	0.929335	1.0429	1.03806	1.17204	1.09904	1.17668
YBL046W	0.657257	0.730091	0.781295	0.727854	0.697167	0.7172
YBL045C	1.63656	1.74674	1.78449	1.99306	1.87037	2.00061
YBL043W	0.335965	0.353423	0.400295	0.662546	0.594481	0.648443
YBL042C	1.73009	1.81116	1.79181	1.74508	1.63565	1.53223
YBL041W	1.95718	1.98833	2.11151	2.14975	2.07108	2.04154
YBL040C	1.28192	1.18021	1.13514	1.17158	1.19633	1.27273
YBL039C	1.88718	1.91645	1.85969	1.5154	1.44258	1.26015
YBL038W	1.05114	1.09833	1.1022	1.26434	1.21158	1.21457
YBL037W	0.618754	0.651066	0.649335	0.716081	0.699994	0.717331
YBL036C	0.981341	0.853658	0.85561	0.805258	0.921276	0.863075
YBL035C	0.809573	0.809168	0.790097	0.77106	0.7738	0.773043
YBL034C	0.483723	0.483031	0.469332	0.494932	0.501856	0.515942
YBL033C	1.18052	1.39019	1.49119	1.47985	1.23038	1.24894
YBL032W	0.983117	1.0331	1.12657	1.00731	0.948957	0.977178
YBL031W	0.955864	0.934673	0.957383	0.95987	0.970424	0.947565
YBL030C	3.73895	3.90644	4.39035	4.86928	4.48495	4.5612
YBL028C	1.29693	1.0373	1.05169	0.94682	0.950136	0.837147
YBL027W	6.60405	6.37208	6.56996	6.79742	6.65997	6.28842
YBL026W	1.16092	1.03219	1.09637	1.12054	1.19394	1.2514
YBL025W	0.893275	0.968743	0.959144	0.779947	0.761429	0.803736
YBL024W	1.20879	1.21794	1.18928	1.12465	1.16693	1.09224
YBL023C	0.60793	0.698448	0.686528	0.751938	0.720247	0.739351
YBL022C	0.858251	0.893039	0.860096	0.925684	0.902527	0.926961
YBL021C	0.82441	0.934346	1.00326	0.882675	0.769698	0.784584
YBL020W	0.703315	0.715791	0.700032	0.648402	0.631989	0.665313
YBL019W	0.625254	0.586699	0.513572	0.498482	0.54862	0.545238
YBL018C	1.02064	0.976553	1.05699	0.832673	0.870131	0.810548
YBL017C	0.869861	0.908669	0.854827	0.94649	0.941498	0.936793
YBL016W	1.13975	1.23179	1.34237	1.48868	1.29753	1.29402
YBL015W	0.421385	0.512393	0.532801	0.573527	0.501095	0.612153
YBL014C	0.759451	0.766103	0.735617	0.721892	0.717311	0.702197
YBL013W	0.372955	0.422402	0.478318	0.35415	0.342743	0.372612
YBL011W	0.957467	1.02066	1.00744	0.926743	0.907885	0.942896
YBL009W	0.792768	0.807368	0.772874	0.699872	0.732845	0.774315
YBL008W	0.497793	0.526059	0.51802	0.516642	0.487448	0.507146
YBL007C	0.901737	1.02006	1.03481	1.22576	1.12547	1.19287
YBL006C	1.14744	1.34154	1.48788	1.4276	1.19945	1.27801
YBL005W	1.39109	1.31263	1.27233	0.952864	1.00994	1.02597
YBL004W	1.06993	1.01298	0.937951	0.854527	0.903711	0.882822
YBL003C	7.03426	6.17253	6.61727	5.08922	5.32094	5.3912
YBL002W	7.06804	6.08278	6.2994	5.24784	5.39094	5.50242
YBL001C	3.00638	2.88746	3.03085	2.27453	2.43253	2.31936
YBR001C	0.636167	0.654977	0.629248	0.740988	0.740777	0.822171
YBR002C	1.58741	1.66526	1.69969	1.66096	1.52658	1.5438
YBR003W	0.670371	0.732024	0.718245	0.776479	0.799991	0.869833
YBR004C	0.717146	0.649254	0.595758	0.743755	0.796952	0.802725
YBR005W	0.736939	0.834937	0.877509	1.159	0.978908	1.05875
YBR006W	0.613015	0.684453	0.691908	0.650152	0.646332	0.698987
YBR008C	0.923483	0.978601	0.921373	0.948585	0.942839	0.992138
YBR009C	7.619	7.28194	9.06963	6.53311	6.33413	6.46504
YBR010W	8.91096	7.90268	9.15553	7.00257	7.15001	6.96997
YBR011C	2.33796	2.43718	2.59271	2.08836	1.9855	1.9792
YBR014C	0.728879	0.730724	0.748245	0.73124	0.745245	0.79264
YBR015C	1.14772	1.21945	1.20098	1.26087	1.20142	1.22198
YBR016W	1.1394	1.2546	1.27554	1.41663	1.38236	1.3774
YBR017C	0.919029	0.932856	0.931574	0.920515	0.927587	0.933335
YBR018C	0.220273	0.244145	0.229325	0.24113	0.245435	0.279188
YBR019C	0.428445	0.466843	0.470763	0.480089	0.470926	0.504013
YBR020W	0.751258	0.778102	0.805066	0.705476	0.702692	0.755544
YBR021W	0.977436	1.01394	0.92538	1.05049	1.03433	1.02926
YBR022W	0.865275	0.880444	0.862414	0.942146	0.993451	1.05863
YBR023C	0.930614	0.991141	0.959352	1.61461	1.54657	1.53428
YBR024W	0.835296	0.841379	0.824479	0.590916	0.611776	0.628198
YBR025C	3.05904	3.13916	3.26213	3.07389	2.91277	2.91604
YBR026C	0.510522	0.507613	0.480259	0.557281	0.561811	0.65493
YBR029C	1.4613	1.45321	1.5023	1.41956	1.3539	1.37316
YBR030W	0.883963	0.932074	0.916185	0.804828	0.8057	0.787293
YBR031W	6.83498	7.30947	7.82307	7.17425	6.48217	6.09493
YBR034C	1.99159	2.11671	2.14335	2.2006	1.98834	1.89583
YBR035C	1.433	1.47471	1.47834	1.55619	1.59028	1.53624
YBR036C	1.24224	1.34329	1.43898	1.50409	1.35925	1.39125
YBR037C	0.664901	0.736446	0.771353	0.7694	0.675931	0.739052
YBR038W	0.885656	0.922507	0.885088	1.07393	1.0474	1.11885
YBR039W	1.43591	1.47536	1.56841	1.63012	1.60992	1.63725
YBR040W	0.187978	0.205952	0.164938	0.186642	0.18218	0.212402
YBR041W	0.665895	0.666634	0.650975	0.729834	0.732852	0.771753
YBR042C	0.724201	0.727966	0.68599	0.677902	0.704345	0.718481
YBR043C	0.809111	0.86448	0.886101	0.975406	0.94605	0.957705
YBR044C	0.719766	0.793339	0.814208	0.905886	0.881327	0.897074
YBR045C	0.306535	0.29746	0.300808	0.268654	0.272269	0.295634
YBR046C	0.367907	0.428457	0.374291	0.396727	0.404848	0.462322
YBR048W	4.73501	4.54494	4.66487	4.93062	4.92878	4.56518
YBR049C	0.913329	0.984887	1.03755	0.947319	0.889807	0.920431
YBR050C	0.638263	0.68115	0.764889	0.693353	0.616465	0.663382
YBR052C	0.688186	0.770884	0.802142	1.05125	1.00722	1.25037
YBR054W	0.672676	0.73568	0.756458	0.878699	0.850516	1.05212
YBR055C	0.583859	0.584973	0.529272	0.528258	0.568609	0.575045
YBR057C	0.871911	0.881507	0.908759	0.944006	0.878324	0.881652
YBR058C	0.624449	0.642541	0.63442	0.652832	0.645332	0.650722
YBR058C-A	0.866602	0.846059	0.857226	0.863282	0.891719	0.981006
YBR059C	0.633914	0.682225	0.645888	0.79222	0.796951	0.880085
YBR060C	0.725142	0.73257	0.706553	0.667624	0.661056	0.677031
YBR061C	0.915393	0.965091	0.99984	0.911851	0.857646	0.828644
YBR065C	0.551992	0.528058	0.569534	0.605862	0.615235	0.601652
YBR066C	0.988817	0.967377	0.9964	0.948356	0.927557	1.02155
YBR067C	1.5431	1.69924	2.06637	1.74157	1.52721	1.69242
YBR068C	5.56509	5.55388	5.69362	6.91493	6.86515	6.86649
YBR069C	3.22719	3.35821	3.60492	2.73244	2.60926	2.40153
YBR070C	0.914658	0.852272	0.880393	0.846737	0.916652	0.977781
YBR072W	0.477313	0.55	0.625521	0.841248	0.711554	0.877936
YBR073W	0.81039	0.821105	0.776445	0.943427	0.964987	0.945745
YBR076W	0.415356	0.411365	0.403431	0.622251	0.663476	0.689725
YBR077C	1.60797	1.59059	1.6782	1.95462	2.00157	2.07152
YBR078W	5.52714	5.62703	5.91961	6.285	5.93954	5.83075
YBR079C	2.13584	2.24818	2.17448	2.30428	2.19548	2.07593
YBR080C	0.708246	0.719694	0.731123	0.723902	0.714057	0.763165
YBR081C	0.579021	0.58543	0.567377	0.597716	0.592315	0.607273
YBR082C	2.49511	2.55632	2.64645	2.6294	2.41962	2.63921
YBR083W	1.4816	1.55158	1.6134	1.87886	1.83962	1.86685
YBR084W	1.27323	1.31486	1.28922	1.02397	0.985629	0.885379
YBR084C-A	6.18707	6.0985	6.13436	6.37514	6.21468	5.86348
YBR085W	0.329827	0.386535	0.384979	0.304261	0.295879	0.353655
YBR086C	1.20248	1.22006	1.13998	1.25997	1.27557	1.35565
YBR087W	1.03887	1.02947	1.1311	1.02086	1.01455	1.03777
YBR088C	1.62496	1.64254	1.7727	1.72788	1.61903	1.60775
YBR089C-A	1.69394	1.76196	1.89994	1.72747	1.68874	1.75231
YBR091C	1.19387	1.31157	1.34966	1.58583	1.48719	1.52525
YBR092C	1.79363	1.90804	2.21068	2.85081	2.54322	2.48592
YBR093C	1.61581	1.90747	2.05583	2.75452	2.42322	2.40212
YBR094W	0.594346	0.620236	0.584904	0.574077	0.576375	0.585045
YBR095C	0.723346	0.714724	0.71547	0.744424	0.705057	0.727813
YBR097W	0.446031	0.421521	0.409976	0.404495	0.421956	0.4368
YBR098W	0.636061	0.663186	0.623459	0.546046	0.571907	0.607954
YBR101C	2.33299	2.34647	2.2506	2.20982	2.32536	2.36305
YBR102C	0.593509	0.622012	0.589945	0.650317	0.647304	0.670158
YBR103W	0.68091	0.740147	0.76053	0.762398	0.690666	0.730913
YBR104W	0.863157	0.899643	0.92509	0.835667	0.805732	0.778443
YBR105C	0.655904	0.723413	0.73294	1.20147	1.08482	1.09715
YBR106W	3.46484	3.71222	4.1078	3.19986	2.81774	2.74751
YBR107C	0.913539	1.03296	1.05991	0.840182	0.77998	0.815967
YBR108W	0.46814	0.531442	0.524657	0.541464	0.500881	0.524689
YBR109C	1.46174	1.5644	1.59305	1.79913	1.79027	1.79147
YBR110W	0.547446	0.565487	0.559414	0.624921	0.608763	0.624854
YBR111C	0.630398	0.653942	0.687595	0.770672	0.761349	0.900611
YBR111W-A	0.831492	0.662575	0.659263	0.661615	0.766582	0.785425
YBR112C	1.38582	1.55159	1.58038	1.60032	1.42074	1.45648
YBR114W	0.508346	0.560838	0.546043	0.577793	0.54189	0.550481
YBR115C	0.84139	0.900039	0.888373	0.810323	0.765118	0.797529
YBR117C	0.665393	0.731469	0.766719	0.61307	0.563562	0.635538
YBR118W	15.8503	16.3121	18.5819	19.6745	17.8182	16.7613
YBR119W	1.09594	1.01115	0.968287	0.918113	1.01088	0.979876
YBR120C	0.925538	0.783114	0.754822	0.777044	0.862985	0.858962
YBR121C	1.67026	1.60584	1.54479	1.53456	1.53398	1.46533
YBR122C	1.56812	1.39427	1.41325	1.18549	1.19654	1.2137
YBR123C	0.664931	0.629171	0.628459	0.605343	0.628271	0.653414
YBR125C	0.797274	0.859849	0.906494	0.716898	0.650854	0.735525
YBR126C	0.848314	1.03218	1.1349	1.60507	1.38701	1.87528
YBR127C	1.47358	1.56361	1.61622	1.6861	1.58446	1.68893
YBR128C	0.67745	0.75824	0.710401	0.685724	0.686526	0.74163
YBR129C	0.67427	0.665053	0.665831	0.67667	0.70632	0.726967
YBR130C	0.973784	0.918581	0.865284	0.935212	0.97926	0.968456
YBR131W	0.438242	0.45046	0.44835	0.416818	0.420619	0.436873
YBR132C	0.407262	0.466388	0.441763	0.741566	0.697005	0.7618
YBR133C	0.984108	1.03772	1.01679	0.991889	0.970737	0.967479
YBR135W	0.987694	1.10031	1.26154	1.24534	1.12666	1.09261
YBR136W	0.371198	0.381918	0.350705	0.36239	0.376724	0.39364
YBR137W	0.661788	0.665739	0.646242	0.740681	0.786596	0.79899
YBR139W	0.555342	0.626109	0.627388	0.966732	0.967897	1.20087
YBR140C	0.579966	0.583883	0.549791	0.588123	0.614023	0.62445
YBR142W	0.911535	0.823329	0.802822	0.693676	0.714536	0.694555
YBR143C	2.11627	1.97297	1.91509	2.02427	2.02046	1.9814
YBR145W	0.518167	0.566159	0.592037	0.516977	0.484041	0.517012
YBR146W	0.914541	0.904745	0.920756	1.00225	1.01634	1.00604
YBR147W	0.240054	0.236839	0.230415	0.300942	0.287063	0.329817
YBR148W	0.273714	0.251737	0.250343	0.245728	0.259808	0.276328
YBR149W	0.758593	0.860873	0.869003	1.12934	1.08636	1.30204
YBR150C	0.582221	0.590448	0.569941	0.664512	0.69361	0.710576
YBR151W	0.91401	0.975649	1.0057	1.06985	1.01639	1.19796
YBR152W	0.744024	0.778439	0.795302	0.698751	0.6769	0.714471
YBR153W	1.39934	1.4539	1.39784	1.31992	1.27437	1.24456
YBR154C	2.26223	1.95628	1.88472	1.78891	2.0097	1.83965
YBR155W	0.810521	0.807873	0.788267	0.662354	0.657904	0.632059
YBR156C	0.536033	0.53392	0.483519	0.561019	0.602628	0.597128
YBR157C	1.15419	1.12611	1.18102	1.19299	1.19749	1.18003
YBR158W	3.47546	3.28823	3.47882	4.57145	4.6598	4.38078
YBR159W	0.866925	0.905323	0.899882	0.967466	0.950781	0.968771
YBR160W	1.04494	1.047	1.09716	1.43468	1.36723	1.40737
YBR161W	0.771015	0.747959	0.764829	0.79615	0.808464	0.876749
YBR162C	2.85398	3.01172	3.29191	3.47307	3.1372	3.07687
YBR162W-A	2.06063	2.0594	2.07933	2.12438	2.16701	2.1702
YBR163W	0.760387	0.750826	0.707195	0.669074	0.699012	0.706925
YBR164C	0.930708	0.89366	0.86924	0.915541	0.924881	0.925214
YBR165W	0.84697	0.820654	0.878839	0.839427	0.854461	0.864041
YBR166C	0.785329	0.796152	0.779649	0.832581	0.823289	0.822581
YBR167C	1.0212	1.02569	1.14683	1.1767	1.14562	1.13288
YBR168W	0.409815	0.38121	0.382066	0.426017	0.444428	0.48099
YBR169C	0.369895	0.413656	0.425332	0.568882	0.559023	0.655737
YBR170C	0.789482	0.825836	0.789143	0.855465	0.810618	0.838845
YBR171W	1.0957	0.964753	0.931581	0.855842	1.01223	0.945364
YBR172C	1.68873	1.73247	1.69517	1.70331	1.60208	1.55301
YBR173C	1.61353	1.8121	1.97897	1.72694	1.47682	1.54865
YBR175W	0.842105	0.916969	0.970821	0.829769	0.746173	0.735779
YBR176W	0.703424	0.736868	0.763513	0.627614	0.605391	0.647487
YBR177C	0.807283	0.864462	0.856565	0.83803	0.821324	0.952058
YBR179C	0.578468	0.571923	0.544665	0.551135	0.55678	0.575083
YBR180W	0.390899	0.413687	0.401233	0.296211	0.294702	0.323061
YBR181C	5.47418	5.47948	5.57919	6.06003	5.86147	5.46935
YBR182C	0.454084	0.495563	0.485746	0.431753	0.402614	0.446304
YBR183W	0.561773	0.599592	0.589865	0.825001	0.798495	0.979359
YBR185C	0.623768	0.597473	0.647391	0.670736	0.664772	0.700947
YBR186W	0.577959	0.53935	0.542523	0.400183	0.408201	0.419705
YBR188C	0.945881	0.904065	0.915926	0.770802	0.787798	0.792883
YBR189W	7.01118	6.53736	6.58713	6.77873	6.9716	6.49018
YBR191W	6.44015	6.29355	6.61893	6.82982	6.62702	6.21582
YBR192W	0.942034	0.932962	0.879703	0.777949	0.826719	0.829439
YBR193C	0.902613	0.929408	0.936316	0.845506	0.815253	0.863231
YBR194W	0.806974	0.834291	0.786693	0.806317	0.771251	0.830058
YBR195C	0.958767	0.924857	1.00171	0.848871	0.827322	0.831532
YBR196C	4.10166	4.50219	4.93773	5.05081	4.47477	4.41042
YBR198C	1.15876	1.25913	1.21804	1.10005	1.07317	1.0833
YBR199W	0.827025	0.816902	0.830234	0.965243	0.983296	1.07641
YBR200W	0.531173	0.552224	0.520242	0.591572	0.592315	0.619868
YBR201W	0.564584	0.561036	0.586247	0.63544	0.648024	0.643278
YBR202W	0.961583	1.04861	1.05043	1.16723	1.08196	1.14039
YBR203W	0.440481	0.470306	0.447352	0.671888	0.634839	0.69799
YBR204C	0.403059	0.402213	0.403629	0.432341	0.456071	0.497958
YBR205W	0.811439	0.858775	0.904102	0.83863	0.815017	0.801967
YBR207W	0.913255	0.972723	0.989386	0.96101	0.988884	0.964196
YBR208C	0.545336	0.617575	0.595155	0.567771	0.553155	0.584771
YBR210W	0.734778	0.652097	0.69977	0.667319	0.697911	0.728435
YBR211C	0.717336	0.722094	0.732919	0.801203	0.817263	0.822296
YBR212W	0.57035	0.649157	0.626733	0.857795	0.812552	0.854906
YBR213W	0.517831	0.598467	0.630861	0.586696	0.536801	0.60144
YBR214W	0.52509	0.591133	0.615099	0.765251	0.687258	0.832142
YBR215W	0.63059	0.607156	0.565826	0.562597	0.584784	0.593903
YBR216C	0.604433	0.561314	0.548431	0.593364	0.595738	0.624119
YBR217W	0.578048	0.561978	0.52865	0.581034	0.590624	0.626244
YBR218C	0.870031	0.98396	0.994605	1.00611	0.936608	0.955277
YBR221C	1.03174	1.14768	1.16799	1.22215	1.09768	1.15685
YBR222C	0.602508	0.697014	0.696746	0.774989	0.714014	0.731638
YBR223C	0.46312	0.505688	0.533356	0.544011	0.518062	0.574813
YBR227C	0.563516	0.583126	0.57366	0.575886	0.602637	0.611814
YBR228W	0.743993	0.683839	0.673923	0.657007	0.678132	0.708298
YBR229C	0.524908	0.538411	0.537362	0.563513	0.538443	0.562157
YBR230C	0.733826	0.793688	0.845139	1.07528	0.966694	1.17519
YBR231C	0.798274	0.906278	0.971015	0.84597	0.740482	0.799582
YBR233W	0.654084	0.671893	0.696325	0.679187	0.620171	0.652003
YBR233W-A	0.731113	0.815091	0.859156	0.824203	0.753803	0.814152
YBR234C	0.886054	0.930247	0.958485	1.05035	0.993246	1.10156
YBR236C	0.734556	0.747604	0.732989	0.810892	0.794247	0.803066
YBR237W	0.498706	0.493137	0.47974	0.534468	0.535974	0.541905
YBR238C	0.818099	0.852184	0.868065	0.567402	0.550742	0.552586
YBR240C	0.35506	0.3904	0.42679	0.409543	0.372265	0.41454
YBR243C	0.815773	0.80759	0.830938	0.744131	0.783647	0.767785
YBR244W	0.817823	0.708849	0.702968	0.635319	0.700562	0.71946
YBR245C	0.701465	0.707336	0.690549	0.659394	0.653203	0.68212
YBR247C	1.24938	1.26926	1.18672	1.03025	0.986217	0.920497
YBR248C	1.2445	1.35634	1.31679	1.07821	1.01188	0.994584
YBR249C	2.20028	2.37057	2.52414	2.07936	1.87931	1.78873
YBR250W	0.304976	0.279822	0.268501	0.229677	0.251807	0.270806
YBR251W	0.861025	0.878468	0.940922	0.883298	0.859886	0.895488
YBR252W	1.18623	1.26288	1.366	0.994663	0.988656	0.927835
YBR253W	1.23781	1.26043	1.32566	1.11741	1.01679	1.10299
YBR254C	0.854965	0.81823	0.934881	0.838099	0.828883	0.820847
YBR255W	0.458352	0.509226	0.487489	0.54469	0.520717	0.530982
YBR256C	0.905747	0.949299	0.981791	1.14247	1.08823	1.1387
YBR257W	0.838453	0.775636	0.788465	0.781657	0.817115	0.821988
YBR258C	0.917866	0.85668	0.86352	0.881029	0.902634	0.895932
YBR260C	0.657356	0.660682	0.639741	0.615861	0.627691	0.625281
YBR261C	0.892261	1.09756	1.23385	1.00497	0.850959	0.911316
YBR262C	1.22252	1.29771	1.2775	1.30404	1.25803	1.27534
YBR263W	1.1133	1.19906	1.22546	1.07922	0.982055	0.950375
YBR264C	0.803982	0.86379	0.938238	0.853118	0.787983	0.826678
YBR265W	1.22522	1.34131	1.45544	1.1852	1.04709	1.09695
YBR267W	1.50964	1.5645	1.54019	1.27168	1.21195	1.09432
YBR268W	0.922133	1.10433	1.23939	1.01798	0.942073	0.978419
YBR272C	0.499792	0.492608	0.51409	0.561006	0.562775	0.588889
YBR273C	0.570841	0.684422	0.671292	0.712095	0.637269	0.678343
YBR274W	0.459034	0.462276	0.46875	0.469039	0.46617	0.486642
YBR275C	0.490663	0.493695	0.465252	0.457799	0.476415	0.483617
YBR276C	0.554115	0.566075	0.551312	0.585366	0.579496	0.606604
YBR278W	0.72474	0.776397	0.79825	0.76493	0.729044	0.733805
YBR279W	0.963006	0.938558	0.967435	1.01071	0.979874	1.01323
YBR280C	0.424506	0.462187	0.455089	0.457341	0.470773	0.491691
YBR281C	0.530898	0.525915	0.524613	0.501837	0.534643	0.546884
YBR282W	1.08984	1.13329	1.13256	1.18185	1.11502	1.17764
YBR283C	1.50573	1.51114	1.46005	1.48208	1.44773	1.47851
YBR286W	1.3391	1.52497	1.56815	1.79717	1.66043	1.82647
YBR288C	0.758726	0.730002	0.689866	0.928221	0.946531	0.976792
YBR289W	0.651233	0.706472	0.725545	0.741461	0.697479	0.713429
YBR290W	1.06471	1.108	1.14809	1.26296	1.18857	1.22093
YBR291C	0.984036	1.01503	1.00825	1.12257	1.04597	1.09618
YBR293W	0.704776	0.670847	0.672356	0.63819	0.670414	0.64839
YBR294W	0.465061	0.493812	0.516893	0.476527	0.472231	0.504767
YBR295W	0.513422	0.560568	0.587034	0.817879	0.746344	0.75276
YBR296C	0.318187	0.367526	0.348645	0.857294	0.839526	0.780472
YBR297W	0.417745	0.470876	0.452055	0.756177	0.732632	0.790664
YBR298C	0.503602	0.557571	0.533023	0.666814	0.661752	0.7735
YBR299W	0.625618	0.626123	0.617898	0.589682	0.581333	0.637958
YBR301W	0.387273	0.427451	0.497568	0.336155	0.295701	0.340364
YBR302C	0.442555	0.441845	0.386012	0.412456	0.473996	0.508495
YCL069W	0.269592	0.28106	0.258709	0.273062	0.2666	0.277571
YCL064C	1.00496	0.801424	0.800317	0.693295	0.708051	0.683282
YCL063W	1.21022	1.27356	1.32009	1.20169	1.19143	1.18048
YCL061C	0.665679	0.63091	0.601085	0.604476	0.617162	0.631423
YCL059C	1.27139	1.18766	1.17431	1.07023	1.0519	0.963745
YCL058C	2.08568	2.05556	2.02486	1.92709	1.94095	1.79448
YCL058W-A	2.17643	2.21548	2.19633	2.07154	2.02075	1.89473
YCL057W	0.873605	0.877568	0.853645	0.869545	0.880842	0.888518
YCL055W	1.72692	1.64562	1.83232	1.78539	1.71393	1.65141
YCL054W	1.45482	1.42411	1.35935	1.30648	1.28288	1.17468
YCL052C	0.718417	0.721053	0.695228	0.811991	0.829955	0.892079
YCL051W	0.715517	0.792262	0.797987	0.921375	0.842403	0.881896
YCL050C	1.45633	1.52876	1.57073	1.3568	1.36526	1.31303
YCL048W	0.307844	0.320223	0.313348	0.28579	0.293099	0.320277
YCL045C	0.931098	0.965932	0.970651	1.00814	0.976581	1.01827
YCL044C	1.18067	1.23129	1.23244	1.16276	1.1224	1.11175
YCL043C	3.00777	3.32122	3.72123	3.72392	3.21595	3.32713
YCL040W	0.634525	0.791694	0.865193	2.48324	2.17961	3.08805
YCL039W	0.675341	0.749034	0.75372	0.784997	0.703614	0.77571
YCL038C	0.491608	0.517336	0.486087	0.714519	0.676839	0.735928
YCL037C	3.7297	3.88079	4.02023	4.242	3.83461	3.47588
YCL036W	1.46041	1.54434	1.50864	1.15965	1.02038	0.961571
YCL035C	1.39925	1.4696	1.43422	1.78054	1.6849	1.89953
YCL034W	0.836142	0.991981	1.1024	1.183	0.994589	1.08584
YCL033C	0.689087	0.807776	0.799125	0.829563	0.794786	0.79382
YCL032W	0.770443	0.833281	0.863491	0.881233	0.813491	0.806461
YCL031C	1.96075	1.77057	1.80844	1.77985	1.79661	1.73623
YCL030C	0.872271	0.952844	0.926834	1.16138	1.05706	1.08687
YCL029C	0.767774	0.879249	0.907369	0.929484	0.807153	0.839388
YCL028W	0.772411	0.841535	0.896325	0.932768	0.808033	0.851069
YCL027W	0.413068	0.419246	0.447047	0.457648	0.403407	0.456293
YCL026C-A	0.423542	0.452148	0.491224	0.420085	0.386286	0.417978
YCL025C	1.56253	1.79632	1.98723	2.3677	2.17906	2.19269
YCL024W	0.547945	0.581405	0.55438	0.580888	0.589819	0.632902
YCL018W	2.18686	2.50966	2.73309	2.33703	2.09167	2.11435
YCL017C	0.878153	0.934228	0.96561	1.03268	0.914476	0.95793
YCL016C	0.651643	0.745982	0.765289	0.763303	0.672772	0.711852
YCL014W	0.625714	0.639088	0.581128	0.718433	0.727528	0.734459
YCL012C	0.7348	0.720123	0.695483	0.740369	0.751423	0.765776
YCL011C	2.11309	2.26032	2.13118	2.16709	2.03326	1.98442
YCL010C	1.93775	2.12406	2.31837	1.79555	1.62959	1.67642
YCL009C	1.78352	2.06962	2.30169	1.85737	1.58684	1.60715
YCL008C	0.961703	1.14664	1.23683	1.02225	0.870696	0.955623
YCL005W-A	4.0206	3.81256	3.83411	3.26174	3.34798	3.19418
YCL005W	0.963633	1.02722	1.11802	0.937394	0.884519	0.910782
YCL004W	0.8319	0.794607	0.772234	0.713519	0.749564	0.746446
YCL001W	1.12461	1.12068	1.11915	1.07068	1.10138	1.10707
YCR002C	1.01685	0.997768	0.977255	1.17188	1.23998	1.24792
YCR003W	0.938085	0.85764	0.850375	0.921497	0.985393	0.993498
YCR004C	0.762286	0.840482	0.820002	1.1178	1.08399	1.22397
YCR005C	2.63156	2.73533	2.7888	3.17776	3.04653	3.02592
YCR008W	1.10637	1.08651	1.05974	1.05752	1.0806	1.10349
YCR009C	1.07943	1.01539	1.04727	1.22805	1.22545	1.32668
YCR010C	0.338767	0.393101	0.386593	0.59756	0.57651	0.616304
YCR011C	0.811929	0.832274	0.821393	0.947491	0.967696	1.0146
YCR012W	12.3885	13.2439	15.7226	12.6009	11.2385	11.8055
YCR014C	1.04485	0.923871	0.87567	0.752922	0.839012	0.850972
YCR017C	0.761371	0.799098	0.793334	0.833492	0.812734	0.818679
YCR018C	1.16988	1.06235	1.28911	1.05154	1.04082	1.05556
YCR019W	0.497726	0.582424	0.580242	0.589046	0.589059	0.586867
YCR020C	0.658382	0.730567	0.719561	0.662108	0.694941	0.687214
YCR020C-A	0.713867	0.715916	0.820273	0.755476	0.657065	0.801443
YCR020W-B	0.913247	0.751646	0.769702	0.720654	0.775159	0.787419
YCR021C	0.563145	0.615593	0.63176	0.604724	0.594849	0.65943
YCR023C	0.892269	0.942703	0.928707	0.859824	0.866984	0.912215
YCR024C	0.886621	0.869325	0.801561	0.81626	0.897978	0.863783
YCR024C-A	7.9783	6.86276	6.53807	7.99895	8.66014	8.55146
YCR026C	0.892042	0.941646	0.984525	1.05188	1.01563	1.00208
YCR027C	0.77235	0.812819	0.770459	0.784877	0.789179	0.800985
YCR028C	0.837656	0.803351	0.80178	0.730905	0.748816	0.729291
YCR028C-A	1.24544	1.07262	1.19824	1.04339	1.12254	1.09538
YCR030C	0.801912	0.878328	0.835504	0.894095	0.879863	0.957313
YCR031C	7.02981	6.61983	7.15567	7.35524	7.15268	6.68026
YCR032W	0.455612	0.458301	0.41353	0.4282	0.450095	0.473494
YCR033W	1.05582	1.10075	1.05765	1.07685	1.07237	1.07325
YCR034W	1.93767	1.86922	1.77288	1.65729	1.69033	1.5588
YCR035C	1.60721	1.57664	1.51744	1.46774	1.42222	1.33501
YCR036W	1.10362	1.08816	0.998825	1.64069	1.74055	1.67121
YCR037C	1.23305	1.23351	1.20596	1.29715	1.27453	1.27566
YCR038C	0.665892	0.687402	0.710747	0.731346	0.708275	0.732862
YCR039C	0.453097	0.387306	0.336499	0.392845	0.437849	0.489842
YCR040W	0.175248	0.173958	0.16815	0.195551	0.192707	0.189333
YCR042C	0.920296	0.910736	0.87735	0.885988	0.909667	0.920315
YCR044C	1.3517	1.379	1.41843	1.24167	1.21455	1.27798
YCR045C	0.81661	0.977778	0.980306	0.898629	0.832456	0.811662
YCR046C	1.65629	1.94062	1.95061	1.55518	1.39709	1.4585
YCR047C	1.15673	1.27554	1.33221	1.08966	0.972953	0.902191
YCR048W	0.671876	0.812492	0.855295	0.753267	0.611865	0.642014
YCR052W	0.961246	1.13408	1.18121	1.2112	1.01588	1.02175
YCR053W	2.12027	2.17611	2.20236	2.18572	2.10291	1.9754
YCR054C	0.862348	0.825461	0.829483	0.712157	0.74565	0.732393
YCR057C	1.56819	1.59899	1.53023	1.35972	1.26806	1.17015
YCR059C	1.09672	1.33817	1.50688	1.09749	0.973753	0.957366
YCR060W	0.797491	0.876487	0.916213	0.891304	0.747215	0.812866
YCR063W	1.82167	1.81597	1.98782	2.37032	2.30804	2.13723
YCR065W	1.90401	1.88798	1.84815	2.03317	2.03317	2.03459
YCR066W	0.670105	0.657421	0.631286	0.621669	0.666732	0.658573
YCR067C	0.849177	0.894718	0.911651	0.907951	0.891363	0.916411
YCR068W	0.656382	0.776368	0.836976	0.737769	0.639295	0.673823
YCR069W	0.966499	1.04999	1.07777	1.10113	1.03142	1.05609
YCR071C	1.28232	1.31929	1.21726	1.22736	1.29308	1.3003
YCR072C	1.4245	1.50523	1.47579	1.285	1.21021	1.0788
YCR073C	0.659911	0.671788	0.669071	0.771634	0.743835	0.736858
YCR073W-A	0.645285	0.767578	0.82981	0.817008	0.716458	0.782695
YCR075C	0.581648	0.631858	0.69111	0.614144	0.573035	0.620487
YCR077C	1.0855	1.15142	1.15534	1.22414	1.13563	1.16229
YCR079W	1.09666	1.22108	1.25143	1.16563	1.07242	1.11622
YCR081W	0.510873	0.497169	0.483311	0.498551	0.503442	0.521838
YCR082W	1.36128	1.29767	1.25383	1.347	1.35103	1.36046
YCR083W	0.9099	0.990051	0.987765	0.938109	0.876678	0.897632
YCR084C	1.52258	1.70974	1.73735	1.76163	1.58255	1.57753
YCR086W	1.32691	1.42554	1.30598	1.16016	1.07298	1.08181
YCR088W	1.05001	1.15139	1.1136	1.19681	1.10768	1.13104
YCR089W	0.532886	0.601455	0.625918	0.644749	0.591092	0.612457
YCR091W	0.367067	0.382034	0.367739	0.466923	0.455415	0.530039
YCR092C	0.612747	0.62647	0.59466	0.605673	0.618181	0.623703
YCR093W	1.44384	1.4041	1.32516	1.37594	1.428	1.4121
YCR094W	0.570722	0.5561	0.554177	0.602156	0.610566	0.635772
YCR098C	0.579044	0.60736	0.650966	1.2329	1.20561	1.2544
YCR104W	0.22327	0.242576	0.265889	0.223836	0.172382	0.217509
YCR105W	0.490304	0.50101	0.501528	0.486774	0.482314	0.509521
YCR106W	0.718509	0.717654	0.685928	0.726584	0.766447	0.74588
YCR107W	0.781873	0.848399	0.853493	1.00388	1.0108	0.970538
YDL248W	0.389324	0.386052	0.375827	0.429598	0.463418	0.501802
YDL247W	0.413078	0.460938	0.419795	0.545073	0.538215	0.571618
YDL245C	0.32668	0.371248	0.358062	0.49245	0.478767	0.51753
YDL244W	0.339117	0.363062	0.415007	0.413028	0.356781	0.407673
YDL243C	0.350882	0.372435	0.419032	0.369645	0.33254	0.330739
YDL240W	0.64787	0.638739	0.623484	0.714224	0.705268	0.712223
YDL239C	0.329923	0.301543	0.281773	0.278567	0.310741	0.31547
YDL238C	0.424409	0.486666	0.524826	0.634919	0.615939	0.643811
YDL237W	0.607352	0.585883	0.59694	0.62759	0.62843	0.674466
YDL236W	1.11201	1.16952	1.25419	1.25678	1.17276	1.16678
YDL235C	1.27251	1.17463	1.1932	1.51055	1.54237	1.53816
YDL234C	0.609124	0.600563	0.594375	0.739453	0.707448	0.737427
YDL232W	1.56363	1.61159	1.70227	1.4128	1.55582	1.37397
YDL231C	0.902446	0.92415	0.878646	0.918937	0.912966	0.903566
YDL230W	0.508315	0.588175	0.626988	0.6639	0.554428	0.600414
YDL229W	6.89311	7.37039	7.88178	7.30729	6.47194	5.76832
YDL227C	1.28837	1.24756	1.35547	0.624325	0.615356	0.613198
YDL226C	1.12281	1.12616	1.1448	1.08607	1.02629	1.01257
YDL225W	0.774029	0.763893	0.770437	0.755548	0.787487	0.742315
YDL224C	1.12664	1.21221	1.12087	1.29764	1.24183	1.28237
YDL223C	0.42294	0.481448	0.481367	0.555311	0.498645	0.530224
YDL222C	0.39304	0.454304	0.436411	0.754426	0.686881	0.840849
YDL220C	0.494639	0.549913	0.520915	0.612219	0.56112	0.570884
YDL219W	0.723098	0.57148	0.609428	0.501153	0.540246	0.540506
YDL217C	1.03968	1.07237	1.10749	1.0837	1.00866	0.96712
YDL216C	0.515008	0.539437	0.563022	0.555913	0.520301	0.56709
YDL215C	0.880511	0.836026	0.815439	0.945412	0.973491	0.992038
YDL214C	0.340906	0.382305	0.392498	0.432579	0.417724	0.435017
YDL213C	1.07141	1.00272	1.01608	1.12421	1.07011	0.962175
YDL212W	1.22839	1.2655	1.34117	1.36162	1.31716	1.30194
YDL210W	0.335432	0.374746	0.37356	0.346547	0.321743	0.325178
YDL209C	0.726637	0.752564	0.725758	0.707793	0.72098	0.710121
YDL208W	2.71189	2.77936	3.09077	2.7037	2.43315	2.30115
YDL207W	0.78542	0.774566	0.745183	0.87013	0.837014	0.845719
YDL205C	1.26027	1.24402	1.23537	1.21052	1.20497	1.16103
YDL204W	0.708689	0.767266	0.762351	1.09947	1.02699	1.23177
YDL203C	0.642308	0.649699	0.659297	0.674068	0.644332	0.655623
YDL202W	1.1265	1.12534	1.16829	1.02679	0.975472	0.983446
YDL201W	1.14985	1.18139	1.158	0.933263	0.947908	0.896977
YDL200C	0.702564	0.713934	0.63965	0.658471	0.65898	0.70311
YDL198C	1.48769	1.60089	1.57223	1.39448	1.32836	1.31112
YDL197C	0.70143	0.776662	0.798363	0.807623	0.704664	0.812918
YDL195W	1.20637	1.29894	1.25185	1.32232	1.2812	1.32431
YDL194W	0.307974	0.332985	0.341287	0.365101	0.350338	0.387783
YDL193W	1.06131	0.98713	0.987445	0.895544	0.905475	0.923939
YDL192W	3.17838	3.27724	3.68872	3.48635	3.28665	3.31189
YDL191W	5.40588	4.75154	4.81677	4.93647	5.15748	4.85154
YDL190C	0.841536	0.849373	0.818553	0.798057	0.820135	0.855164
YDL189W	0.867173	0.892322	0.951825	0.834457	0.783527	0.807135
YDL188C	0.769022	0.835614	0.902221	0.850681	0.789639	0.836627
YDL185W	1.58023	1.67476	1.6729	1.79796	1.70621	1.75821
YDL184C	10.6143	9.00144	9.12437	7.84656	8.49277	7.90741
YDL183C	0.461147	0.457195	0.444408	0.375068	0.415597	0.448524
YDL182W	2.52979	2.73323	3.13449	2.55208	2.20481	2.14058
YDL181W	1.61114	1.60952	1.72048	1.74302	1.75057	1.77573
YDL179W	1.59146	1.56039	1.61751	1.82561	1.72804	1.7091
YDL178W	0.805385	0.815337	0.803793	0.830249	0.796897	0.818436
YDL176W	0.588099	0.603273	0.610065	0.613725	0.615105	0.610425
YDL175C	1.02454	1.0895	1.14075	1.08829	0.998163	1.04382
YDL174C	0.975446	1.07369	1.14028	1.07379	0.956157	1.01957
YDL173W	1.00659	1.08558	1.2114	1.19057	1.03449	1.04113
YDL171C	1.092	1.21581	1.254	1.05767	0.968064	0.991287
YDL170W	0.506983	0.540493	0.494154	0.492861	0.489054	0.49258
YDL169C	0.298793	0.327243	0.316847	0.372097	0.348236	0.38606
YDL168W	0.840412	0.90618	0.892458	0.866761	0.802967	0.835265
YDL167C	1.32358	1.35231	1.39965	1.21436	1.14844	1.03268
YDL166C	1.43266	1.48142	1.80271	1.36239	1.12266	1.13224
YDL165W	1.02263	1.08719	1.0922	1.03269	0.991657	0.986648
YDL164C	0.682622	0.703436	0.650835	0.657539	0.623259	0.671223
YDL161W	1.32789	1.48691	1.52252	1.47197	1.30533	1.32058
YDL160C	1.31656	1.31179	1.29564	1.55833	1.52324	1.55123
YDL159W	0.706565	0.68745	0.744302	0.741816	0.716871	0.726163
YDL155W	1.16481	1.23553	1.26458	1.30635	1.18945	1.25696
YDL154W	0.4499	0.468073	0.434021	0.391917	0.408258	0.424945
YDL153C	0.976102	0.980142	0.928233	0.858622	0.807727	0.749948
YDL150W	1.07396	1.10084	1.07822	0.991148	0.951	0.948163
YDL149W	0.410562	0.440262	0.414081	0.402224	0.393632	0.424068
YDL148C	0.922671	0.86483	0.833806	0.806537	0.842765	0.783003
YDL147W	1.49908	1.42475	1.35041	1.52083	1.59902	1.63262
YDL146W	0.538289	0.5709	0.550606	0.577244	0.605962	0.656458
YDL145C	1.07337	1.17039	1.13918	1.18936	1.13166	1.12635
YDL143W	1.61827	1.80403	1.87965	1.70094	1.53954	1.47916
YDL142C	0.800673	0.721643	0.670922	0.688997	0.733806	0.737331
YDL141W	0.656808	0.724583	0.692926	0.672477	0.640603	0.658045
YDL140C	1.7388	1.89279	1.88408	1.94269	1.81412	1.80518
YDL139C	0.452709	0.538091	0.606524	0.541887	0.459418	0.517223
YDL138W	0.997668	1.12097	1.17876	1.17184	1.07168	1.0796
YDL137W	2.93321	3.10555	3.21725	2.84494	2.65063	2.63544
YDL136W	4.439	3.97024	3.8969	4.107	4.21111	3.93937
YDL135C	1.23835	1.10484	1.01994	0.917706	1.0541	1.03869
YDL134C	1.26053	1.39315	1.4734	1.50327	1.34112	1.40714
YDL133C-A	8.45351	7.00316	7.32472	7.32905	8.11996	7.50111
YDL132W	0.771515	0.781813	0.759516	0.764399	0.761553	0.787329
YDL131W	1.78024	1.90255	2.06547	1.77213	1.63446	1.55717
YDL130W-A	0.38724	0.432448	0.379815	0.873653	0.967451	1.10329
YDL130W	7.06146	7.00407	7.16947	7.46784	7.29144	6.82455
YDL128W	1.62239	1.73139	1.79998	1.62708	1.50852	1.50183
YDL127W	1.17707	1.20868	1.21622	1.14387	1.12477	1.09956
YDL126C	1.67211	1.89946	1.95159	2.10855	1.91271	2.04003
YDL125C	2.25953	2.48683	2.87248	4.16031	3.64707	3.97086
YDL124W	1.20795	1.30965	1.32067	1.9319	1.8483	2.26585
YDL123W	1.17299	1.26685	1.26985	1.35472	1.25711	1.40859
YDL122W	1.19937	1.18558	1.16797	1.1688	1.12794	1.08339
YDL120W	1.12386	1.17255	1.21769	1.32999	1.16402	1.27467
YDL117W	1.05597	1.0546	1.00165	1.24432	1.26315	1.25166
YDL116W	0.986579	0.981448	0.938154	0.924131	0.989608	0.962951
YDL115C	0.670987	0.644087	0.610711	0.631677	0.632783	0.722051
YDL113C	0.472005	0.488642	0.477441	0.584284	0.582375	0.642546
YDL112W	0.722767	0.70725	0.692274	0.617785	0.645689	0.614758
YDL111C	1.37054	1.45327	1.46435	1.34068	1.24078	1.19979
YDL110C	1.03226	1.18913	1.28353	1.88298	1.63159	1.92941
YDL108W	0.662897	0.718245	0.7316	0.701373	0.679458	0.6837
YDL107W	0.621317	0.606248	0.548571	0.565589	0.628094	0.626898
YDL106C	0.695784	0.74504	0.739996	0.790587	0.784147	0.838048
YDL105W	0.82489	0.802277	0.780233	0.701333	0.710336	0.711188
YDL104C	0.866887	0.842341	0.824567	0.716958	0.696472	0.762493
YDL103C	0.565898	0.587424	0.593629	0.581465	0.576586	0.598951
YDL102W	0.544402	0.572749	0.5512	0.552465	0.515744	0.541834
YDL101C	0.649668	0.669295	0.689391	0.726282	0.701515	0.73058
YDL100C	1.20303	1.29496	1.46831	1.41198	1.24992	1.32967
YDL099W	0.747546	0.766642	0.689809	0.694648	0.763445	0.760149
YDL098C	0.650443	0.558317	0.639891	0.492844	0.532782	0.509517
YDL097C	1.4729	1.61595	1.71942	1.7098	1.55696	1.60242
YDL095W	1.54118	1.70116	1.77966	1.54627	1.44209	1.42379
YDL093W	0.497003	0.540909	0.52262	0.46639	0.444282	0.479179
YDL092W	1.04078	1.04787	0.976736	1.01829	1.14919	1.14429
YDL091C	0.559214	0.571664	0.564577	0.552291	0.569851	0.586186
YDL090C	0.529045	0.569906	0.575931	0.547684	0.504874	0.537365
YDL089W	0.549037	0.500487	0.490133	0.493934	0.511582	0.53381
YDL088C	1.05671	1.04794	1.07215	1.04228	1.07302	1.04151
YDL087C	0.682401	0.800749	0.841221	0.741244	0.662011	0.742677
YDL085W	0.545337	0.635597	0.668935	0.729151	0.685761	0.752045
YDL084W	1.82392	1.83358	1.87816	1.8012	1.72061	1.71175
YDL083C	5.81662	5.4695	5.47383	5.6138	5.6357	5.21713
YDL082W	4.54318	4.37187	4.43099	4.04112	3.9682	3.72304
YDL081C	6.50002	5.86271	5.93672	5.96621	6.02388	5.69872
YDL080C	0.947528	1.01007	1.00547	0.901778	0.849166	0.879076
YDL079C	0.600336	0.592678	0.637833	0.638849	0.625959	0.70112
YDL078C	0.664287	0.757049	0.771616	0.844221	0.777856	0.854191
YDL077C	0.449226	0.434805	0.404473	0.435275	0.437463	0.473444
YDL076C	0.777609	0.776771	0.821261	0.892267	0.863753	0.980138
YDL075W	6.5299	5.56308	5.57745	5.69175	6.1943	5.6238
YDL074C	1.27144	1.17297	1.1292	1.10461	1.13115	1.10744
YDL072C	1.26492	1.2665	1.30441	1.96779	1.95623	2.09184
YDL070W	2.69732	2.50348	2.50232	2.17807	2.23852	2.20025
YDL069C	1.37618	1.18929	1.15327	0.934399	1.03544	0.993854
YDL067C	2.04638	1.99348	2.02094	2.19006	2.04792	2.12085
YDL066W	1.0884	1.25538	1.31719	1.24868	1.17503	1.20913
YDL065C	0.858476	0.917511	0.941072	0.845647	0.839176	0.891942
YDL064W	1.03856	0.988394	0.950962	0.812274	0.906783	0.898797
YDL063C	1.21812	1.08281	1.04158	0.896253	0.94729	0.835665
YDL061C	5.7631	4.99892	4.99948	5.42774	5.79744	5.33134
YDL060W	1.11548	1.1427	1.13779	1.02874	0.979324	0.920508
YDL059C	0.556454	0.622102	0.66995	0.541981	0.507969	0.5288
YDL058W	0.553712	0.538326	0.522746	0.510473	0.535592	0.544929
YDL056W	1.01516	1.01083	0.988287	1.04606	1.09093	1.10021
YDL055C	7.70145	7.78206	9.05969	10.3489	9.689	9.25885
YDL054C	0.405173	0.481314	0.481737	0.509578	0.44378	0.484162
YDL053C	0.936719	0.965	0.977203	0.94123	0.925845	0.992297
YDL052C	1.44302	1.53608	1.6391	1.49588	1.37581	1.41168
YDL051W	1.86314	1.80178	1.7387	1.72135	1.69139	1.55949
YDL049C	0.845268	0.919132	1.02602	0.907005	0.827012	0.781117
YDL048C	0.631652	0.686233	0.76465	0.739391	0.668346	0.739498
YDL047W	1.42347	1.59389	1.51734	1.58646	1.47858	1.48535
YDL046W	1.69635	1.84677	1.86369	1.89451	1.7348	1.86992
YDL045W-A	1.19818	1.11992	1.07615	1.16429	1.21422	1.11555
YDL045C	0.730043	0.700446	0.740197	0.786715	0.76921	0.777486
YDL044C	0.776135	0.797602	0.834504	0.789686	0.776079	0.763929
YDL043C	0.773689	0.812561	0.864282	0.814632	0.812602	0.81038
YDL042C	0.763219	0.761983	0.755636	0.57334	0.597282	0.610401
YDL040C	0.816606	0.804845	0.780542	0.759266	0.777752	0.748585
YDL039C	0.343793	0.361231	0.418261	0.414797	0.361967	0.381168
YDL037C	0.221677	0.270798	0.311626	0.263148	0.22223	0.242442
YDL036C	1.02174	1.05424	1.06218	0.839792	0.819619	0.791167
YDL035C	0.69469	0.683806	0.698424	0.738642	0.779246	0.784361
YDL033C	1.47439	1.61737	1.61754	1.69132	1.50222	1.54699
YDL031W	0.855601	0.867856	0.815589	0.791782	0.757957	0.761028
YDL030W	0.666798	0.650137	0.614523	0.539276	0.578167	0.557526
YDL029W	1.02591	1.0264	1.11158	1.21763	1.13352	1.15115
YDL028C	0.714228	0.7177	0.71353	0.776171	0.786274	0.790595
YDL025C	0.546867	0.597536	0.551357	0.67863	0.653675	0.740558
YDL024C	0.268721	0.279887	0.276894	0.258253	0.261276	0.278605
YDL022W	1.09122	1.24468	1.45724	1.96803	1.80104	2.35876
YDL021W	0.533902	0.522207	0.532883	0.651857	0.689415	0.753137
YDL020C	1.96612	2.17687	2.27373	2.40407	2.31141	2.50025
YDL019C	0.531835	0.57184	0.559746	0.547444	0.524551	0.614942
YDL018C	0.695464	0.71161	0.740013	0.798151	0.72449	0.799385
YDL017W	0.58191	0.623523	0.597567	0.603226	0.598562	0.611785
YDL015C	1.19005	1.10829	1.04898	1.10507	1.21362	1.16124
YDL014W	4.26035	4.57203	4.61775	4.35479	3.91632	3.46004
YDL013W	0.811368	0.886888	0.902296	0.937643	0.839787	0.865979
YDL012C	1.53402	1.64878	1.74896	1.56131	1.47833	1.47522
YDL010W	0.936	0.892319	0.869022	0.883063	0.948944	0.951845
YDL008W	1.72361	1.81571	2.18147	1.28926	1.14547	1.17243
YDL007W	1.32388	1.33944	1.29335	1.37785	1.40856	1.44107
YDL006W	0.982202	1.06423	1.04248	0.985603	0.94544	1.02197
YDL005C	0.854236	0.845849	0.866473	0.847986	0.84049	0.869878
YDL004W	1.38873	1.47956	1.54537	1.68828	1.627	1.75263
YDL003W	1.31845	1.31812	1.3931	1.38922	1.31585	1.32277
YDL002C	0.910513	0.918039	0.881408	0.895556	0.874742	0.906215
YDL001W	0.730889	0.730677	0.714821	0.656302	0.685658	0.7022
YDR001C	0.708003	0.770659	0.738405	1.42478	1.37536	1.53974
YDR002W	1.99326	1.92901	2.0702	2.28361	2.13504	2.12303
YDR003W	0.981502	1.02273	1.11228	1.14214	1.01115	1.18143
YDR004W	0.995007	0.998739	0.988487	0.923273	0.955372	0.955982
YDR005C	0.901023	0.828321	0.823849	0.859686	0.904017	0.927599
YDR006C	1.13489	1.16341	1.14935	1.26182	1.23509	1.18277
YDR007W	1.22657	1.31118	1.33199	1.44762	1.39599	1.45844
YDR009W	0.400058	0.448936	0.443025	0.416055	0.403613	0.447271
YDR011W	1.93412	2.12647	2.18603	2.34619	2.22469	2.27588
YDR012W	6.89004	7.49384	8.17657	7.52271	6.52714	6.28247
YDR013W	1.3073	1.30211	1.30157	1.16835	1.20642	1.18072
YDR014W	0.451415	0.426882	0.415657	0.413848	0.429303	0.426448
YDR014W-A	0.442167	0.463531	0.456919	0.510864	0.45692	0.514436
YDR016C	0.772855	0.882592	0.909926	0.876987	0.854541	0.961482
YDR017C	1.0865	1.12402	1.0998	1.15174	1.1566	1.14845
YDR019C	0.537405	0.597561	0.598573	0.798289	0.735287	0.764124
YDR021W	0.752735	0.730599	0.700848	0.608365	0.602516	0.562749
YDR022C	0.664765	0.769093	0.758583	0.618384	0.586721	0.623876
YDR023W	2.20587	2.05117	1.99687	2.11735	2.13996	2.03607
YDR025W	6.67789	6.3504	6.74859	6.95625	6.74349	6.28775
YDR026C	1.01199	1.07673	1.03541	1.00374	0.986773	0.967749
YDR027C	0.692111	0.69613	0.664263	0.691588	0.696594	0.740449
YDR028C	0.868335	0.945712	0.921565	1.13535	1.07364	1.08377
YDR030C	0.672063	0.65764	0.626146	0.595026	0.611644	0.661285
YDR031W	0.479555	0.447511	0.43526	0.555281	0.59793	0.666347
YDR032C	0.683623	0.792638	0.859863	1.18895	1.06683	1.23236
YDR033W	5.75112	5.86773	6.43912	7.0882	6.74515	6.80168
YDR034C	1.02198	1.00248	0.966245	0.953857	1.01111	0.999533
YDR035W	1.14298	1.12479	1.15714	1.29359	1.21263	1.22911
YDR036C	0.725309	0.794354	0.785824	0.735662	0.681274	0.697633
YDR037W	2.80705	2.89047	2.87634	2.6397	2.51892	2.21963
YDR038C	0.893372	0.974533	0.927647	1.17149	1.11895	1.16098
YDR039C	0.842716	0.929897	0.935383	1.26534	1.20538	1.21842
YDR040C	0.829212	0.936096	0.921707	1.39245	1.3205	1.39627
YDR041W	0.892364	0.951851	0.94815	1.27877	1.22744	1.26955
YDR043C	1.3227	1.291	1.34399	1.24403	1.2001	1.35131
YDR044W	0.651156	0.72538	0.842668	0.676499	0.587704	0.648716
YDR045C	1.20948	1.27786	1.43386	1.25451	1.15728	1.20401
YDR046C	2.01014	2.1631	2.25897	2.25037	2.10791	2.13539
YDR047W	1.60244	1.68893	1.7277	1.38204	1.33148	1.37807
YDR050C	10.5615	10.8479	12.4351	10.3188	9.28646	9.06547
YDR051C	0.937609	0.983282	1.02654	0.924226	0.878016	0.893086
YDR052C	1.06592	1.05863	0.997256	0.970939	0.984761	0.965
YDR054C	1.31338	1.38093	1.48128	1.62025	1.48937	1.56009
YDR055W	1.54844	1.57172	1.80054	3.54343	3.31236	3.28251
YDR057W	0.543537	0.547895	0.54292	0.558638	0.554995	0.588976
YDR058C	0.380743	0.399235	0.368675	0.383024	0.404909	0.418418
YDR059C	0.518899	0.50491	0.422247	0.615492	0.627231	0.718251
YDR060W	1.46848	1.41476	1.38271	1.22622	1.24023	1.12474
YDR062W	1.18312	1.21472	1.20094	1.11773	1.08015	1.07293
YDR063W	1.30947	1.33239	1.24774	1.25322	1.2953	1.30526
YDR064W	10.083	9.15572	9.37731	9.66905	10.0522	9.19333
YDR065W	1.0282	0.98292	0.898225	0.816741	0.867918	0.82158
YDR068W	0.666336	0.671748	0.667335	0.708402	0.694286	0.721566
YDR069C	0.525919	0.497127	0.480328	0.503818	0.524601	0.540257
YDR071C	1.19948	1.13391	1.11318	1.21425	1.32978	1.30801
YDR072C	1.49378	1.57095	1.60354	1.71067	1.64375	1.72817
YDR073W	1.80923	1.89731	2.17063	2.37974	2.12834	2.16742
YDR074W	0.734281	0.786887	0.804308	1.42562	1.40441	1.83166
YDR075W	0.799528	0.803591	0.760216	0.807473	0.766115	0.758085
YDR076W	0.77171	0.737412	0.749755	1.09822	1.14708	1.13887
YDR077W	4.886	5.54166	7.18163	20.1198	17.8021	18.2078
YDR078C	1.39966	1.41042	1.54475	3.37632	3.52425	3.51675
YDR079W	0.714238	0.615568	0.542668	0.57887	0.655563	0.686984
YDR079C-A	1.04335	0.968975	0.999354	0.924026	0.940741	1.01376
YDR080W	0.41996	0.408737	0.385768	0.399869	0.429162	0.422027
YDR081C	0.694385	0.681821	0.662833	0.654526	0.671334	0.664816
YDR082W	0.689271	0.702808	0.702697	0.688326	0.671296	0.670765
YDR083W	0.969393	0.8823	0.813485	0.791793	0.812977	0.771659
YDR084C	0.645026	0.706473	0.652236	0.695315	0.677002	0.740011
YDR085C	0.42767	0.444077	0.448835	0.780726	0.767245	0.889998
YDR086C	1.93268	1.732	1.81169	2.15131	2.1994	2.3173
YDR087C	1.41033	1.43866	1.4259	1.23179	1.21827	1.13688
YDR088C	0.604119	0.587902	0.59406	0.575715	0.584448	0.611666
YDR091C	1.65003	1.61781	1.62236	1.50003	1.49629	1.39607
YDR092W	1.30148	1.35688	1.49152	1.11496	1.01839	1.08235
YDR093W	0.805787	0.863774	0.867443	0.743118	0.709074	0.719581
YDR096W	0.587755	0.632513	0.59929	0.669001	0.677217	0.732837
YDR097C	0.546988	0.584086	0.556774	0.541293	0.533391	0.54441
YDR098C	1.04535	1.0205	0.979201	0.927985	0.967762	0.928911
YDR099W	1.42716	1.41683	1.38893	1.65737	1.72951	1.83211
YDR100W	0.695978	0.752155	0.747323	0.798172	0.866926	0.905487
YDR101C	1.63019	1.59078	1.56528	1.38244	1.32607	1.18856
YDR103W	0.79419	0.780025	0.737132	0.741144	0.764108	0.746789
YDR104C	0.396527	0.41851	0.409941	0.427308	0.430112	0.44444
YDR105C	0.564423	0.602542	0.600759	0.65791	0.626625	0.650007
YDR106W	0.536214	0.515479	0.498445	0.613117	0.646952	0.689912
YDR107C	1.18417	1.17997	1.16387	1.4916	1.48391	1.50408
YDR108W	0.505708	0.537205	0.530987	0.555601	0.529306	0.555144
YDR110W	0.822565	0.788152	0.828937	0.668489	0.670162	0.673689
YDR113C	0.773863	0.828292	0.827946	0.868148	0.769086	0.835871
YDR116C	0.857178	0.888335	0.871157	0.912709	0.877244	0.91385
YDR117C	0.605824	0.584884	0.581117	0.660975	0.677395	0.700945
YDR118W	0.658952	0.648199	0.658396	0.633276	0.638788	0.632664
YDR120C	1.01617	1.05496	1.02258	0.90974	0.828878	0.841901
YDR121W	0.774934	0.826381	0.904624	0.784582	0.706164	0.730798
YDR122W	0.63225	0.707652	0.683519	0.847994	0.819369	0.876741
YDR123C	0.842487	0.921981	0.983502	0.814717	0.79052	0.798278
YDR125C	0.38846	0.371141	0.335239	0.341819	0.381966	0.423752
YDR126W	1.30744	1.35218	1.50059	1.27902	1.11481	1.13848
YDR127W	1.20595	1.35359	1.37957	1.27697	1.19032	1.17845
YDR128W	0.590155	0.598643	0.56782	0.534621	0.564475	0.557212
YDR129C	1.0256	1.09095	1.09606	1.21631	1.19026	1.28453
YDR130C	0.809777	0.83378	0.872343	0.957523	0.907315	0.913767
YDR135C	0.833659	0.881646	0.87396	0.996198	0.997838	1.00597
YDR137W	0.562588	0.574279	0.533774	0.592151	0.593791	0.607779
YDR138W	0.770388	0.70661	0.669913	0.662686	0.712958	0.706656
YDR139C	0.944432	0.975999	0.986297	0.970327	0.919522	0.983836
YDR140W	0.995253	1.05881	0.974521	0.910334	0.939269	0.920582
YDR141C	0.624675	0.616956	0.586415	0.622128	0.661862	0.659511
YDR142C	0.643625	0.655132	0.642564	0.63681	0.609143	0.633551
YDR143C	1.21487	1.31689	1.35505	1.24256	1.10009	1.10017
YDR144C	1.18603	1.29339	1.3188	1.05281	0.951378	0.968415
YDR145W	0.99167	1.05503	1.03317	1.11732	1.04082	1.06513
YDR146C	0.835931	0.879101	0.841855	1.11961	1.1467	1.21159
YDR147W	0.73946	0.71743	0.681705	0.704308	0.748083	0.750056
YDR148C	0.810616	0.899396	0.896765	0.982842	0.955828	1.04759
YDR150W	0.59431	0.614208	0.579925	0.646985	0.648644	0.662732
YDR151C	1.4693	1.4616	1.50591	1.44103	1.37395	1.43727
YDR152W	1.5387	1.59523	1.6352	1.66597	1.51156	1.46869
YDR153C	1.44207	1.49885	1.55258	1.54249	1.45811	1.44834
YDR155C	5.02394	5.68646	6.43941	4.40878	3.89831	4.32533
YDR156W	2.83975	3.08578	3.17579	2.63445	2.51176	2.42375
YDR158W	1.80052	2.00155	2.12165	1.71552	1.52922	1.53922
YDR159W	0.583169	0.572913	0.536713	0.554183	0.574617	0.590717
YDR160W	0.499779	0.532081	0.49848	0.534105	0.5134	0.55009
YDR162C	0.834664	0.869426	0.945238	0.962022	0.886485	0.886412
YDR163W	0.857531	0.894305	0.844313	0.842201	0.901848	0.917409
YDR164C	0.552379	0.541645	0.520808	0.539059	0.543376	0.56665
YDR165W	1.37088	1.22876	1.18246	1.05813	1.09128	1.0281
YDR166C	0.651098	0.598952	0.558785	0.564783	0.609178	0.603501
YDR167W	1.01875	1.09465	1.21386	1.14416	1.05334	1.05821
YDR168W	0.778116	0.742433	0.683163	0.74802	0.743747	0.805291
YDR169C	0.659766	0.739485	0.696683	0.789023	0.76101	0.756931
YDR170C	0.689033	0.731286	0.716346	0.740932	0.725267	0.734776
YDR171W	0.4852	0.60754	0.694193	0.970774	0.839619	1.28808
YDR172W	2.04857	2.18679	2.26714	2.26384	2.04046	2.00467
YDR173C	1.06076	1.01486	1.02197	0.918782	0.970788	0.943246
YDR174W	3.1868	3.29762	3.36438	3.39415	3.24128	3.03025
YDR175C	0.918565	0.923176	0.923905	0.904991	0.903239	0.871397
YDR176W	0.905664	0.869235	0.839407	0.775681	0.772016	0.781263
YDR177W	1.3669	1.38587	1.47135	1.49336	1.33744	1.41588
YDR178W	0.729689	0.76316	0.781224	0.921329	0.924106	1.02166
YDR179C	0.459023	0.408818	0.391185	0.382906	0.424446	0.46095
YDR180W	0.473274	0.453991	0.42734	0.391269	0.424544	0.429983
YDR181C	0.563608	0.558338	0.527105	0.624159	0.627408	0.61664
YDR182W	0.66465	0.65698	0.653667	0.722513	0.746648	0.780401
YDR183W	0.708325	0.691522	0.729063	0.645137	0.660117	0.687769
YDR184C	1.11626	1.00317	1.01761	0.860102	0.868359	0.810274
YDR185C	1.13536	1.18941	1.27197	0.78438	0.724563	0.746158
YDR186C	1.13093	1.25598	1.26919	1.2813	1.21217	1.21264
YDR188W	1.88814	2.24602	2.45433	2.28621	1.95173	1.88291
YDR189W	0.896982	0.87145	0.855417	0.81112	0.82004	0.813349
YDR190C	1.47265	1.53512	1.61407	1.71205	1.5691	1.5339
YDR191W	0.521614	0.530057	0.514557	0.605546	0.574683	0.605277
YDR192C	0.526754	0.605986	0.646091	0.631649	0.555724	0.571312
YDR194C	1.26342	1.18642	1.11063	1.1077	1.15827	1.13247
YDR195W	1.0524	0.994422	0.975738	0.916129	0.932147	0.914774
YDR196C	0.640108	0.659561	0.644288	0.778845	0.714976	0.793247
YDR197W	0.658237	0.616291	0.601007	0.620573	0.665202	0.708844
YDR198C	0.675028	0.652546	0.670154	0.562676	0.58897	0.537522
YDR200C	0.493542	0.494364	0.471505	0.508262	0.507086	0.543968
YDR201W	0.541999	0.629078	0.640435	0.651677	0.666775	0.694083
YDR202C	0.524178	0.561373	0.538443	0.557669	0.57661	0.614181
YDR204W	0.575932	0.605696	0.632708	0.581951	0.558592	0.575275
YDR205W	0.627011	0.687662	0.68787	0.637106	0.627944	0.658296
YDR206W	0.849192	0.860692	0.816484	0.800787	0.796274	0.766477
YDR207C	0.51728	0.603731	0.618825	0.561728	0.492137	0.535795
YDR208W	1.183	1.19926	1.19372	1.33487	1.3308	1.31866
YDR211W	1.15253	1.15862	1.15585	1.14651	1.1294	1.09405
YDR212W	1.2878	1.35101	1.35163	1.33667	1.22462	1.21265
YDR213W	0.816627	0.877692	0.943011	0.846096	0.793285	0.819083
YDR214W	1.70236	1.97579	2.10138	2.22152	2.04171	2.31611
YDR216W	0.371423	0.395645	0.380514	0.844566	0.854323	0.867388
YDR217C	0.530893	0.547471	0.51954	0.510295	0.513327	0.518437
YDR218C	0.264422	0.253866	0.261429	0.253729	0.274463	0.30341
YDR219C	0.708757	0.685205	0.668498	0.762781	0.821047	0.851904
YDR221W	0.958792	0.982769	0.9996	0.861029	0.852476	0.894383
YDR223W	0.512806	0.549079	0.59728	0.685471	0.686927	0.699694
YDR224C	8.99647	7.89011	8.98337	6.0012	5.91947	5.82948
YDR225W	9.85371	8.93873	10.0713	6.71084	6.68406	6.65906
YDR226W	2.40062	2.48696	2.59118	1.94699	1.90918	1.82621
YDR227W	0.545855	0.536212	0.497117	0.519469	0.527308	0.541738
YDR228C	0.94099	0.924362	0.859557	0.770036	0.790899	0.809063
YDR229W	0.769323	0.827691	0.87495	0.835603	0.800428	0.86958
YDR231C	0.803754	0.830412	0.849035	0.987181	0.950669	0.967547
YDR232W	1.52165	1.7431	1.78654	1.61755	1.41053	1.40367
YDR233C	3.96045	3.74448	3.86601	3.69209	3.60289	3.52029
YDR234W	1.19762	1.29553	1.3012	1.13533	1.04061	1.01506
YDR235W	0.71153	0.65709	0.597304	0.560591	0.581431	0.601716
YDR236C	0.851864	0.914593	0.880844	0.833715	0.789959	0.822362
YDR237W	0.863797	0.872182	0.839898	0.794238	0.766835	0.817494
YDR238C	1.21514	1.28935	1.31646	1.27734	1.2243	1.21937
YDR239C	0.566417	0.591751	0.582747	0.539995	0.514567	0.53947
YDR240C	0.668236	0.651006	0.679983	0.598348	0.582294	0.579751
YDR242W	0.756025	0.835813	0.801048	0.944384	0.91479	0.945723
YDR243C	0.635989	0.640539	0.643733	0.650007	0.651169	0.688485
YDR244W	0.564982	0.602665	0.602711	0.600008	0.566653	0.628002
YDR245W	1.33391	1.39338	1.36437	1.39057	1.37757	1.33787
YDR246W	1.042	1.12375	1.10957	1.24666	1.18841	1.24328
YDR247W	0.608479	0.650629	0.658036	0.983666	0.973253	1.07703
YDR251W	0.713943	0.747516	0.719721	0.895403	0.919259	0.9769
YDR252W	0.71056	0.630276	0.649033	0.631188	0.593377	0.615349
YDR253C	0.779523	0.799118	0.834413	0.739368	0.771295	0.721348
YDR254W	0.668393	0.623344	0.591295	0.689346	0.732459	0.775659
YDR255C	0.618295	0.647395	0.623829	0.775796	0.76667	0.800873
YDR256C	0.975825	1.06094	1.04354	0.889697	0.85187	0.83306
YDR257C	0.864489	0.809878	0.7908	0.745058	0.776627	0.780872
YDR258C	0.644581	0.731366	0.748108	0.992137	0.997069	1.28724
YDR259C	0.488034	0.473352	0.473715	0.522639	0.540647	0.542736
YDR260C	1.17337	1.22134	1.35246	1.56284	1.36353	1.46996
YDR261C	0.96082	1.00808	1.01386	1.09877	1.06402	1.13362
YDR263C	0.469908	0.461544	0.4211	0.416946	0.452848	0.484878
YDR264C	0.920796	1.00746	1.01348	1.04329	0.986881	0.996226
YDR265W	0.807812	0.794404	0.789831	0.822105	0.794814	0.789841
YDR266C	0.969455	0.960481	0.930795	0.942161	0.917715	0.920151
YDR267C	0.797188	0.894387	0.964396	0.902036	0.806089	0.791763
YDR268W	1.14608	1.1544	1.1635	0.800956	0.805072	0.803634
YDR270W	0.75475	0.818074	0.809205	0.613258	0.588048	0.617207
YDR272W	0.738146	0.747045	0.729716	0.796351	0.836783	0.883639
YDR273W	0.501627	0.565032	0.537288	0.544247	0.486703	0.524645
YDR275W	1.48857	1.58696	1.72395	1.33442	1.25443	1.21819
YDR276C	3.27516	3.15119	3.27014	3.82254	3.83034	4.10916
YDR277C	0.654884	0.743701	0.758181	1.2075	1.18562	1.39103
YDR279W	0.730819	0.713551	0.661172	0.575109	0.605737	0.610084
YDR280W	1.56739	1.59878	1.58601	1.42853	1.34055	1.30444
YDR281C	1.47702	1.51063	1.52465	0.974445	0.923528	0.903925
YDR283C	0.573897	0.567181	0.543375	0.55454	0.578337	0.574925
YDR284C	1.09588	1.17641	1.26603	1.08819	1.02722	1.06508
YDR285W	0.380423	0.354857	0.347848	0.300638	0.332622	0.344903
YDR287W	0.486219	0.515925	0.524485	0.58727	0.55371	0.585814
YDR288W	0.789424	0.725032	0.727598	0.684078	0.729436	0.755804
YDR289C	0.710815	0.727496	0.72761	0.704582	0.71501	0.705367
YDR292C	0.772683	0.790157	0.745637	0.742496	0.75459	0.733018
YDR293C	0.911289	0.97674	0.959728	1.29035	1.24701	1.32243
YDR294C	0.80983	0.932161	0.924752	1.08253	1.00574	1.03294
YDR295C	0.664234	0.665346	0.651068	0.586293	0.591405	0.608075
YDR296W	1.22333	1.34767	1.4886	1.48095	1.2603	1.36522
YDR297W	0.85934	0.986371	1.08551	1.16878	0.996109	1.0545
YDR298C	1.42981	1.54922	1.58726	1.81621	1.71406	1.74642
YDR299W	1.43683	1.38034	1.33251	1.14807	1.14554	1.01964
YDR300C	1.20315	1.2348	1.20063	1.03333	0.931476	0.923184
YDR301W	0.608626	0.644076	0.636049	0.629118	0.620812	0.63654
YDR302W	0.666383	0.592445	0.638513	0.686206	0.727111	0.737013
YDR303C	0.713928	0.692899	0.654093	0.663048	0.696246	0.680869
YDR304C	1.03106	1.13457	1.15115	1.16892	1.09356	1.16206
YDR305C	1.01671	1.09654	1.06337	0.942836	0.978177	1.0018
YDR308C	0.936778	0.99895	1.01602	1.06076	1.05416	1.02076
YDR309C	1.76295	1.86617	2.00576	2.37195	2.1436	2.21272
YDR310C	0.996178	1.01311	1.00726	0.958026	0.901372	0.895152
YDR311W	0.721293	0.777128	0.776324	0.815992	0.807708	0.798466
YDR312W	0.770055	0.757401	0.721297	0.746737	0.766893	0.724661
YDR313C	0.824897	0.890973	0.901724	0.913545	0.889889	0.929154
YDR314C	0.652101	0.644354	0.620503	0.692218	0.697727	0.70832
YDR315C	0.580534	0.546797	0.562476	0.614444	0.605421	0.609571
YDR316W	0.612663	0.567561	0.556188	0.624579	0.669175	0.66827
YDR317W	0.478803	0.45225	0.446674	0.416393	0.446165	0.46054
YDR318W	0.896794	0.837337	0.803134	0.78157	0.841534	0.851673
YDR320C	0.683268	0.70074	0.690503	0.734432	0.721864	0.701613
YDR320C-A	1.16082	1.1295	1.08866	1.13375	1.17936	1.21415
YDR321W	1.09667	1.0997	1.06122	0.938109	0.925417	0.891989
YDR322W	0.788138	0.822255	0.827634	0.83233	0.859688	0.828057
YDR322C-A	1.29145	1.33614	1.35237	1.45335	1.38534	1.41913
YDR323C	0.546035	0.557795	0.56236	0.545185	0.532436	0.571192
YDR324C	1.29193	1.27054	1.22212	1.08006	1.08133	0.972812
YDR325W	0.602484	0.617373	0.613079	0.626802	0.603424	0.621726
YDR326C	0.726866	0.720837	0.712998	0.772657	0.75635	0.773796
YDR328C	0.861735	1.05811	1.1783	1.15647	0.96249	1.05341
YDR329C	0.561979	0.632779	0.614257	0.644105	0.597249	0.63277
YDR330W	0.505325	0.576752	0.607548	0.578005	0.527442	0.546435
YDR331W	1.01114	0.970479	1.02453	0.920505	0.918499	0.965278
YDR332W	0.588248	0.601369	0.595999	0.528907	0.546708	0.563155
YDR334W	0.89545	0.993262	0.942484	0.866224	0.842848	0.866049
YDR335W	0.756742	0.758437	0.716997	0.782324	0.807793	0.824297
YDR337W	0.832742	0.82845	0.833118	0.79634	0.812083	0.843717
YDR339C	1.42617	1.34722	1.41568	1.51198	1.44208	1.39876
YDR341C	1.41928	1.37215	1.32939	1.17734	1.17435	1.19679
YDR342C	0.723833	0.764553	0.837879	2.78316	2.78654	3.36801
YDR343C	0.633444	0.646207	0.721882	2.40156	2.37266	2.95032
YDR345C	3.01662	3.3159	3.86409	1.38928	1.29171	1.32517
YDR346C	1.60196	1.59921	1.61347	1.53825	1.51012	1.42906
YDR347W	1.15287	1.20056	1.16182	1.07249	1.07095	1.09277
YDR349C	1.06638	1.16678	1.21081	1.30045	1.141	1.16995
YDR350C	0.666795	0.648064	0.590813	0.758532	0.778968	0.810745
YDR351W	0.900475	0.865442	0.839279	1.18835	1.15517	1.14689
YDR353W	1.98755	2.204	2.30489	2.16568	2.05485	2.08253
YDR354W	0.963412	1.05577	1.07958	1.05454	0.91788	0.966111
YDR356W	0.536111	0.501453	0.50192	0.515406	0.537108	0.551481
YDR358W	0.483208	0.528496	0.502943	0.588657	0.596411	0.687741
YDR359C	0.888303	0.964893	0.931573	1.01667	0.988123	0.984422
YDR361C	1.32888	1.24596	1.25969	1.02022	0.97866	0.940507
YDR362C	0.608352	0.641895	0.618606	0.626996	0.619481	0.617326
YDR363W	0.594477	0.567157	0.561694	0.579552	0.594866	0.607246
YDR363W-A	1.6521	1.53004	1.56896	1.51934	1.54581	1.47925
YDR364C	0.90512	0.891289	0.902668	0.857754	0.837123	0.811313
YDR365C	1.07673	1.06088	1.01754	0.968393	0.957837	0.909398
YDR367W	0.748144	0.693301	0.686073	0.647876	0.622487	0.665267
YDR368W	0.75939	0.792148	0.785471	0.674921	0.624749	0.674662
YDR369C	0.437582	0.434344	0.420857	0.360263	0.382321	0.408777
YDR372C	0.94968	0.924991	0.875564	0.943482	0.962641	0.949772
YDR373W	0.660465	0.622717	0.61931	0.728966	0.769115	0.758846
YDR375C	0.680383	0.740695	0.725931	0.776954	0.748032	0.771983
YDR376W	0.616896	0.649468	0.624391	0.633689	0.637068	0.664571
YDR377W	2.00943	1.88884	1.97032	1.88209	1.89689	1.97115
YDR378C	1.93638	2.04578	2.10647	1.76882	1.78768	1.70103
YDR379W	0.507752	0.557274	0.537623	0.64713	0.642314	0.68695
YDR379C-A	0.689592	0.585392	0.549584	0.817747	0.955922	1.00402
YDR380W	1.18976	1.20087	1.29649	1.57598	1.54454	1.58716
YDR381W	5.75718	5.47519	5.54635	5.7868	5.8645	5.91066
YDR381C-A	1.91228	1.91018	1.86305	1.68007	1.86248	1.77029
YDR382W	7.78087	7.75543	8.33707	8.45294	8.08479	7.62276
YDR383C	2.31882	2.0088	2.03122	1.89522	2.12742	1.98579
YDR384C	1.13942	1.19378	1.26206	1.07186	0.963426	0.937913
YDR385W	5.30982	5.8529	6.18921	5.61458	5.03178	4.78641
YDR386W	0.565268	0.590135	0.517773	0.538501	0.546691	0.564173
YDR388W	0.790764	0.935963	0.965653	1.08694	0.969751	1.03827
YDR389W	0.926023	0.989982	0.978818	0.976851	0.942589	0.915537
YDR390C	0.715929	0.748789	0.73316	0.742885	0.70876	0.723931
YDR392W	0.666171	0.726154	0.745612	0.707084	0.692427	0.705315
YDR393W	1.2123	1.21144	1.20356	1.15954	1.20572	1.12782
YDR394W	1.49554	1.62485	1.67188	1.65048	1.49164	1.53608
YDR395W	1.30148	1.30294	1.2363	1.11008	1.06122	1.04387
YDR397C	1.42121	1.41513	1.40132	1.20705	1.12631	1.10519
YDR398W	1.5971	1.70596	1.65871	1.40689	1.28429	1.15359
YDR399W	3.40595	3.36485	3.47092	3.49822	3.08502	3.09272
YDR400W	0.774103	0.775961	0.785437	0.747187	0.740967	0.740257
YDR402C	0.327574	0.316829	0.289249	0.278428	0.284081	0.319814
YDR403W	0.322486	0.323054	0.309723	0.264818	0.282391	0.307775
YDR404C	1.25084	1.30756	1.27745	1.41947	1.44519	1.53037
YDR405W	1.09722	1.25048	1.38362	1.24648	1.06535	1.21269
YDR406W	0.409189	0.458981	0.447494	0.458877	0.451437	0.46808
YDR407C	0.62939	0.633473	0.604926	0.642462	0.656875	0.667167
YDR408C	1.3748	1.53233	1.65583	1.64398	1.48785	1.45596
YDR409W	0.742142	0.788036	0.764242	0.677722	0.657842	0.675065
YDR410C	1.30747	1.19476	1.23761	1.09553	1.16524	1.13873
YDR411C	1.05353	1.10589	1.12988	1.23244	1.1717	1.17117
YDR412W	1.03864	0.986831	1.00693	0.871251	0.862792	0.85348
YDR414C	0.78398	0.775471	0.787428	0.66963	0.664819	0.690002
YDR416W	1.05008	1.05583	1.022	0.903165	0.905653	0.897935
YDR418W	6.92764	6.77569	7.53401	7.56976	7.23981	6.87094
YDR419W	0.471386	0.493909	0.465349	0.451862	0.450097	0.497814
YDR420W	0.853463	0.952305	0.961463	1.22255	1.13441	1.10438
YDR421W	0.454374	0.49951	0.47136	0.524767	0.512701	0.533801
YDR422C	0.792502	0.850568	0.84564	0.81293	0.760945	0.773697
YDR423C	0.978848	1.0353	1.08602	1.01223	0.932992	0.983249
YDR424C	1.48505	1.49135	1.58253	1.49158	1.53336	1.53304
YDR425W	0.555166	0.527137	0.510648	0.539487	0.534306	0.544991
YDR427W	1.35493	1.23627	1.16534	1.21014	1.35269	1.28875
YDR428C	1.29722	1.27481	1.26675	1.01629	0.998803	0.970229
YDR429C	2.2595	2.27907	2.33821	2.28484	2.05647	1.94255
YDR430C	0.731152	0.758853	0.707999	0.765269	0.764252	0.80744
YDR432W	3.48784	3.60313	3.67554	4.00826	3.74737	3.67692
YDR434W	0.626991	0.649913	0.683727	0.737755	0.720411	0.732405
YDR435C	0.469795	0.549174	0.541025	0.575066	0.557935	0.584741
YDR436W	0.542928	0.608129	0.622964	0.615237	0.582905	0.627334
YDR437W	0.748723	0.800979	0.918345	0.873786	0.742968	0.799231
YDR438W	0.813391	0.879956	0.844142	0.879136	0.834501	0.888641
YDR439W	0.715982	0.72581	0.771151	0.724544	0.675589	0.67799
YDR440W	0.661914	0.681231	0.692576	0.588678	0.562048	0.569616
YDR441C	2.00257	1.96707	1.93074	1.34931	1.32826	1.36178
YDR443C	0.434957	0.452393	0.455471	0.443704	0.431409	0.468414
YDR446W	0.884698	0.729119	0.608873	0.571587	0.665865	0.584168
YDR447C	5.83266	5.29849	5.36114	5.84802	5.8216	5.41497
YDR448W	1.10224	1.15661	1.16102	1.03741	1.02951	1.00383
YDR449C	1.44485	1.30785	1.2884	1.06396	1.15939	1.02262
YDR450W	5.35663	5.14674	5.12325	5.34533	5.39559	5.08027
YDR451C	1.61139	1.6549	1.75804	2.05187	1.90339	2.01309
YDR452W	0.964091	0.974415	0.964431	0.746956	0.795809	0.815548
YDR453C	0.626005	0.675715	0.657019	0.460711	0.464519	0.496897
YDR454C	1.18304	1.17963	1.19037	0.968247	1.0024	0.97086
YDR456W	0.749085	0.765814	0.731283	0.68961	0.708252	0.702926
YDR457W	0.697601	0.716746	0.689356	0.705234	0.714631	0.718893
YDR458C	0.705704	0.69085	0.640169	0.728311	0.721012	0.76369
YDR459C	0.740493	0.803551	0.805325	0.830347	0.778557	0.806889
YDR460W	1.10625	1.13497	1.22865	1.30001	1.28887	1.18284
YDR461W	2.61993	2.25903	2.49605	2.90018	2.94112	2.81386
YDR462W	1.20588	1.33582	1.37921	1.43874	1.33708	1.3721
YDR463W	1.07848	1.15376	1.15611	1.17218	1.08813	1.09594
YDR464W	0.602402	0.617542	0.588741	0.60693	0.581728	0.582272
YDR465C	0.969693	0.986718	0.999068	0.841451	0.74968	0.68819
YDR466W	0.761626	0.779854	0.753564	0.74393	0.726129	0.771325
YDR468C	1.13878	1.20606	1.27078	1.22977	1.17188	1.18667
YDR469W	0.801102	0.826087	0.892102	0.864024	0.855895	0.826405
YDR470C	0.682552	0.703957	0.701942	0.669868	0.693832	0.692767
YDR471W	5.89272	5.67537	5.97035	5.78903	5.77534	5.47871
YDR472W	1.35529	1.36271	1.39651	1.15345	1.16488	1.15867
YDR473C	0.585459	0.551219	0.543371	0.505392	0.49996	0.519975
YDR475C	0.749321	0.851049	0.874133	0.727111	0.671897	0.724887
YDR477W	0.840996	0.917087	0.893608	0.959225	0.85921	0.926442
YDR478W	0.854478	0.810047	0.815619	0.745907	0.767175	0.802378
YDR479C	1.02036	1.04715	1.00646	0.971039	0.97813	1.02578
YDR480W	0.71992	0.796141	0.792203	0.773701	0.744502	0.760457
YDR481C	1.03946	1.19938	1.28664	1.5568	1.36293	1.3893
YDR482C	0.63978	0.697687	0.761251	0.674486	0.618227	0.609875
YDR483W	1.16909	1.20822	1.18442	1.43419	1.40256	1.42239
YDR484W	0.540316	0.4819	0.438065	0.456623	0.489309	0.490111
YDR485C	0.633954	0.64231	0.627636	0.687189	0.667289	0.690253
YDR486C	0.895646	0.923804	0.964256	1.06297	1.00036	1.05676
YDR487C	1.06981	1.27086	1.35419	1.4587	1.26079	1.28379
YDR488C	0.420934	0.520912	0.551598	0.478133	0.412468	0.434164
YDR489W	1.03619	0.996533	1.09364	0.98982	0.911427	0.933041
YDR490C	0.621403	0.686714	0.683487	0.608847	0.578654	0.635677
YDR492W	1.18897	1.20758	1.29939	1.06009	1.02935	0.983259
YDR493W	1.017	1.09543	1.19322	1.13994	1.05271	1.05815
YDR494W	0.85603	0.820285	0.778235	0.858863	0.851852	0.860548
YDR495C	0.486962	0.445955	0.42064	0.410316	0.447393	0.457922
YDR496C	1.57287	1.45471	1.40154	1.24134	1.28476	1.14882
YDR497C	1.92045	2.13012	2.2827	2.28334	2.05251	2.08359
YDR498C	0.74484	0.823272	0.771425	0.919905	0.891344	0.950556
YDR499W	0.922065	0.886016	0.867821	0.808793	0.843718	0.82624
YDR500C	5.67767	5.39535	5.52014	6.03814	6.03373	5.58848
YDR501W	0.675607	0.703104	0.673102	0.588336	0.605766	0.612587
YDR502C	2.31684	2.63282	2.96309	2.74046	2.38756	2.44996
YDR503C	0.850155	0.95573	1.01593	1.05123	0.980822	0.974342
YDR504C	0.600994	0.430002	0.363165	0.361119	0.482932	0.451453
YDR505C	0.719273	0.720941	0.728432	0.788421	0.765354	0.823666
YDR507C	0.899369	0.910789	0.890426	0.977776	0.977904	0.959347
YDR508C	3.32998	3.41425	3.47158	2.92937	2.82842	2.71135
YDR510W	1.69818	1.80448	1.98469	1.83632	1.73767	1.71867
YDR511W	1.19859	1.26223	1.30063	1.29646	1.27503	1.34008
YDR512C	0.761961	0.793757	0.727002	0.802287	0.840255	0.853566
YDR513W	0.897898	0.925888	0.896713	1.13089	1.08278	1.28315
YDR515W	0.557008	0.497389	0.488818	0.439988	0.470961	0.473525
YDR516C	0.536781	0.604896	0.650354	0.778153	0.68474	0.852424
YDR517W	1.00864	1.15589	1.2814	1.10373	0.938606	1.01869
YDR518W	0.542648	0.565373	0.529625	0.530898	0.538082	0.530449
YDR519W	1.07049	1.14177	1.07793	1.12729	1.07401	1.06581
YDR522C	0.338911	0.324278	0.295623	0.329305	0.352122	0.363049
YDR523C	0.257627	0.286927	0.267631	0.236095	0.235859	0.272669
YDR524C	1.17543	1.12156	1.14026	1.15097	1.17765	1.10927
YDR525W-A	1.37692	1.34238	1.30789	1.61257	1.71701	1.79289
YDR527W	1.64931	1.60764	1.5683	1.31515	1.28422	1.17042
YDR528W	1.46971	1.43543	1.44318	1.26356	1.24368	1.24467
YDR529C	2.04848	2.02086	2.13137	2.21566	2.15445	2.33169
YDR530C	0.857282	0.965951	1.05952	1.05877	0.955457	1.02992
YDR531W	0.770933	0.735819	0.718298	0.706025	0.713777	0.722145
YDR532C	0.544643	0.501118	0.462641	0.513307	0.54997	0.574058
YDR533C	0.756118	0.723297	0.707085	0.593853	0.546735	0.636044
YDR534C	0.275442	0.346908	0.363643	0.342469	0.29439	0.329546
YDR536W	0.460213	0.507204	0.505858	0.594495	0.569143	0.60199
YDR538W	0.886247	0.896637	0.942331	0.882126	0.817077	0.849936
YDR539W	0.669235	0.697768	0.682113	0.639801	0.602868	0.62275
YDR540C	0.335853	0.28979	0.303521	0.255148	0.296188	0.271732
YDR542W	0.187362	0.272853	0.240281	0.226006	0.226777	0.263729
YDR545W	0.843974	0.971642	0.99702	0.90103	0.838954	0.878646
YEL072W	0.699613	0.689963	0.728681	0.814315	0.872788	0.903973
YEL071W	1.96728	2.06411	1.9858	2.03573	2.09659	2.02366
YEL069C	0.351192	0.399863	0.386811	0.414509	0.402711	0.444228
YEL066W	0.537306	0.618194	0.637348	0.673759	0.575309	0.61479
YEL065W	0.793164	0.894751	0.949497	0.967793	0.969927	0.91635
YEL064C	0.483655	0.495831	0.47687	0.514203	0.52942	0.525674
YEL063C	1.32775	1.39594	1.32387	1.63036	1.50745	1.50808
YEL062W	0.504598	0.509597	0.489558	0.53754	0.552154	0.575134
YEL061C	0.60749	0.59443	0.566019	0.61706	0.626562	0.657291
YEL060C	0.932853	1.07226	1.10637	1.58705	1.41994	1.5782
YEL059C-A	0.569601	0.652647	0.690631	1.0085	0.961728	0.997703
YEL058W	0.916779	1.04641	1.08024	1.43879	1.26811	1.26506
YEL056W	1.04339	1.08271	1.07191	0.93006	0.906639	0.91641
YEL055C	1.07405	0.999752	0.931967	0.814851	0.869252	0.842457
YEL054C	6.04466	5.78466	6.16008	6.64262	6.27908	5.8697
YEL053C	0.536412	0.513639	0.521325	0.509098	0.50514	0.526744
YEL052W	0.515315	0.556004	0.557138	0.577376	0.507138	0.573043
YEL051W	1.40766	1.34198	1.39594	1.23721	1.17897	1.24064
YEL050C	0.819729	0.928503	0.924999	0.918719	0.871312	0.894177
YEL049W	0.572256	0.677732	0.681223	0.627991	0.570556	0.546172
YEL048C	0.756109	0.621275	0.658006	0.568527	0.602538	0.566596
YEL047C	0.718668	0.790924	0.838475	0.696985	0.636939	0.686152
YEL046C	7.24099	8.01385	8.71223	6.63608	5.712	5.42133
YEL044W	1.37347	1.59537	1.80067	1.14187	0.972684	0.952573
YEL043W	0.728233	0.788911	0.788666	0.728386	0.698262	0.722301
YEL042W	1.05176	1.10602	1.11033	1.05283	0.969355	0.960044
YEL041W	0.39289	0.42479	0.416562	0.510631	0.507032	0.56498
YEL040W	4.56565	4.68065	5.29367	5.08384	4.66413	4.35622
YEL039C	1.78103	1.76114	1.82113	1.99548	1.90751	2.04728
YEL038W	0.613819	0.692747	0.676387	0.633004	0.598356	0.609765
YEL037C	1.22326	1.35667	1.34473	1.24223	1.11336	1.12801
YEL036C	1.16767	1.31203	1.35119	1.55352	1.37164	1.38706
YEL034W	16.8604	17.1786	20.6487	17.938	16.0413	16.3116
YEL032W	0.893839	1.00121	1.04399	1.06995	0.983169	0.976219
YEL031W	1.13034	1.21399	1.1813	1.25422	1.19194	1.19534
YEL030W	0.483173	0.510798	0.506317	0.429639	0.40561	0.446772
YEL029C	0.637979	0.6089	0.569514	0.539009	0.582226	0.610212
YEL027W	2.51321	2.52886	2.82957	2.97431	2.71552	2.88298
YEL026W	4.88276	4.70529	4.9531	4.97603	4.83618	4.40421
YEL024W	1.92952	2.04374	2.14201	2.82861	2.60206	2.74304
YEL022W	0.592723	0.57345	0.555692	0.563697	0.568564	0.599725
YEL021W	1.08267	1.11364	1.19641	1.1948	1.07438	1.11659
YEL020W-A	2.89586	2.96232	3.13562	3.26965	2.93926	3.00207
YEL019C	0.396853	0.405067	0.412094	0.412647	0.361639	0.387107
YEL018W	1.51006	1.54111	1.65723	1.36946	1.33484	1.31503
YEL017C-A	4.70974	4.09356	4.15025	3.78499	3.98561	3.8456
YEL017W	0.763378	0.844142	0.858387	1.02252	1.00253	1.04014
YEL016C	0.623174	0.670497	0.684882	0.81922	0.786022	0.818264
YEL015W	0.97908	1.02512	0.989855	0.000582634	0.000896035	0.000989213
YEL013W	0.805246	0.822344	0.781394	0.887923	0.891917	0.937204
YEL012W	0.394446	0.42842	0.450049	0.46029	0.478371	0.532746
YEL011W	0.580546	0.646036	0.686052	0.884071	0.855433	1.0607
YEL009C	8.92849	8.97075	9.18862	10.4251	10.0665	9.58776
YEL006W	1.06611	1.04971	1.02157	0.934733	0.978716	0.965038
YEL005C	0.474393	0.508069	0.48841	0.480179	0.479013	0.541843
YEL004W	0.604747	0.568171	0.526051	0.483177	0.556447	0.59767
YEL003W	0.933162	0.828534	0.841366	0.781592	0.939013	0.861083
YEL002C	0.925747	0.928605	0.899151	0.954876	0.964379	0.998719
YEL001C	0.838864	0.85038	0.862704	0.954002	0.950764	0.967449
YER001W	1.25918	1.22587	1.22446	1.32636	1.33143	1.37298
YER002W	1.4876	1.41971	1.51583	1.46834	1.39483	1.31654
YER003C	0.808686	0.819364	0.801678	0.83464	0.849649	0.898596
YER004W	1.02623	1.21789	1.2971	1.2517	1.06942	1.16045
YER005W	0.910079	0.99103	0.953576	0.880173	0.865508	0.880158
YER006W	1.4693	1.50292	1.51676	1.42338	1.33673	1.22047
YER007W	0.564578	0.518463	0.487352	0.449128	0.486548	0.456573
YER007C-A	1.06708	1.00121	1.08235	1.00018	0.943318	0.993763
YER008C	0.653391	0.649326	0.624755	0.673648	0.706694	0.715918
YER009W	1.5618	1.55496	1.71973	1.76829	1.70446	1.62471
YER010C	0.759889	0.752061	0.768607	0.790795	0.842842	0.805112
YER011W	0.262307	0.304478	0.326292	0.313753	0.294509	0.345087
YER012W	2.23186	2.21561	2.36939	2.02782	1.92014	1.96636
YER013W	0.465075	0.477617	0.468273	0.4907	0.492363	0.515688
YER014W	0.350135	0.389803	0.385659	0.382372	0.370311	0.401203
YER014C-A	0.43352	0.463004	0.447669	0.416692	0.385339	0.414418
YER015W	0.422619	0.411404	0.384147	0.345857	0.354282	0.397132
YER016W	0.758647	0.762451	0.786138	0.823402	0.782962	0.84322
YER017C	0.747686	0.838886	0.835464	0.914426	0.873563	0.894825
YER018C	1.04129	1.23813	1.38019	1.21809	1.0431	1.06548
YER019W	1.3047	1.50833	1.6774	1.40245	1.23017	1.25995
YER019C-A	2.88013	3.01138	3.31039	2.95251	2.8168	2.79623
YER020W	0.629076	0.771776	0.811675	0.886431	0.758952	0.829676
YER021W	1.35446	1.323	1.26366	1.3361	1.41955	1.44201
YER022W	0.550097	0.552043	0.527085	0.539752	0.562195	0.571632
YER023W	0.923722	1.07654	1.19172	1.26623	1.05285	1.13212
YER024W	0.717687	0.750722	0.75739	0.631809	0.606928	0.624977
YER025W	1.90067	1.99365	1.95135	1.96747	1.8064	1.78458
YER026C	1.1744	1.15804	1.16293	1.44255	1.44475	1.46605
YER027C	0.627301	0.679757	0.737358	0.758647	0.668414	0.733493
YER028C	0.603023	0.661004	0.654608	0.412771	0.391796	0.432625
YER029C	0.845632	0.8207	0.844659	0.867647	0.86384	0.880084
YER030W	0.833309	0.909315	0.932183	0.981284	0.903012	0.921367
YER031C	0.942611	1.01979	1.10561	1.1968	1.1065	1.1273
YER032W	0.58045	0.58675	0.565831	0.712673	0.695074	0.735308
YER033C	0.336023	0.375735	0.370609	0.460698	0.442703	0.48515
YER035W	1.85486	1.89822	2.06897	2.01066	1.95989	2.02902
YER036C	2.25379	2.30184	2.33918	2.06195	1.98197	1.89274
YER037W	0.797739	0.805475	0.856605	1.17584	1.19728	1.36989
YER038C	0.473089	0.449375	0.427617	0.460475	0.509093	0.529592
YER039C	0.779079	0.865605	0.869121	0.80019	0.76519	0.757312
YER040W	0.596299	0.644534	0.638692	0.699599	0.640396	0.667343
YER041W	0.454199	0.443731	0.431446	0.422862	0.422049	0.450239
YER042W	1.34334	1.19571	1.13861	0.972773	1.07978	1.0213
YER043C	3.51318	3.90721	4.28867	4.15394	3.52937	3.4054
YER044C	1.39709	1.48212	1.56626	1.47825	1.51911	1.57126
YER044C-A	0.534583	0.466313	0.457839	0.448257	0.497527	0.512527
YER045C	0.375447	0.435467	0.45341	0.865091	0.773489	0.808606
YER046W	0.646693	0.726748	0.780615	0.773216	0.786652	0.843643
YER047C	0.541476	0.588683	0.584483	0.666281	0.629762	0.679193
YER048C	0.635592	0.660351	0.669646	0.67307	0.659005	0.690879
YER048W-A	1.065	1.05559	1.12616	1.29653	1.2893	1.32789
YER049W	1.03567	1.08196	1.03193	0.873988	0.868158	0.844222
YER050C	0.70845	0.679336	0.750241	0.86004	0.815746	0.915021
YER051W	0.492043	0.468938	0.465606	0.464122	0.504414	0.538517
YER052C	1.33365	1.46057	1.5132	1.38506	1.31668	1.28587
YER053C	0.65651	0.716087	0.756052	1.47161	1.41371	1.8389
YER054C	0.561448	0.541711	0.571512	0.71479	0.701058	0.822062
YER055C	1.74641	1.8873	1.96126	2.58424	2.38103	2.41759
YER056C	3.40599	3.49405	3.57257	3.65731	3.4678	3.05681
YER056C-A	4.92603	4.48534	4.37883	4.65593	4.98598	4.68591
YER057C	1.28695	1.39057	1.47751	1.39371	1.24645	1.35267
YER058W	0.638551	0.708544	0.711536	0.689868	0.645463	0.693772
YER059W	0.716793	0.745539	0.775036	0.724662	0.685124	0.720104
YER060W	0.901486	0.952339	0.920744	0.689946	0.655296	0.683658
YER060W-A	0.491671	0.490015	0.495228	0.492336	0.500765	0.518243
YER061C	0.425611	0.466877	0.478658	0.553901	0.521828	0.551632
YER062C	0.478422	0.555864	0.547908	1.11477	0.954715	1.07032
YER063W	1.92066	1.90737	1.7621	1.95683	2.09048	2.11801
YER065C	1.23003	1.38971	1.40525	1.46131	1.27293	1.34868
YER067W	0.511228	0.539399	0.612393	2.08768	2.01464	2.48888
YER068W	1.04062	1.08627	1.06354	1.10203	1.05476	1.05994
YER069W	0.624316	0.674486	0.655102	0.640665	0.636271	0.6517
YER070W	2.82859	2.88126	3.18032	3.16711	3.00887	2.92891
YER072W	4.72575	5.01257	5.4623	7.00793	6.28522	6.53716
YER073W	3.33453	3.66879	3.82229	3.1395	2.84106	2.85844
YER074W	5.10071	4.67099	4.6518	5.21203	5.33478	5.00248
YER074W-A	0.854557	0.733984	0.751462	0.776444	0.859107	0.891036
YER075C	0.711242	0.733224	0.734152	0.679199	0.691089	0.665241
YER078C	0.584893	0.5599	0.579858	0.632852	0.616604	0.653738
YER080W	0.55244	0.552474	0.544905	0.577152	0.584722	0.62483
YER081W	2.40843	2.43077	2.47779	2.54643	2.47724	2.49059
YER082C	0.972774	1.03837	1.00393	1.01036	0.955627	0.918718
YER083C	0.941167	1.03368	1.09408	1.12751	0.978448	0.98054
YER086W	1.05546	1.15125	1.18028	1.14001	1.02542	0.970242
YER087W	0.529094	0.52801	0.532015	0.493786	0.485614	0.505127
YER087C-B	1.2647	1.26179	1.15002	1.25303	1.24385	1.24211
YER088C	1.12195	1.26282	1.35786	1.5665	1.38383	1.43275
YER089C	1.41768	1.66694	1.69682	1.76828	1.53684	1.62116
YER090W	0.850131	0.934006	0.923468	0.930531	0.882292	0.91004
YER091C	2.72287	3.02014	3.25877	2.48585	2.22886	2.22438
YER092W	1.36582	1.50154	1.60872	1.60449	1.46516	1.53937
YER093C	0.526274	0.527522	0.51638	0.519226	0.538929	0.553892
YER093C-A	0.839643	0.964318	0.961762	0.863782	0.8341	0.840029
YER094C	1.56771	1.78096	1.94199	1.88731	1.70078	1.83446
YER095W	1.0158	1.09585	1.1273	1.22739	1.07839	1.11713
YER096W	0.251159	0.259583	0.238976	0.264312	0.250094	0.293408
YER098W	0.384741	0.401419	0.393976	0.444888	0.456936	0.506613
YER099C	0.816397	0.919578	0.966964	0.986547	0.945388	0.919642
YER100W	0.824322	0.78577	0.800174	0.825157	0.839081	0.860666
YER101C	0.459356	0.459699	0.467423	0.466901	0.451875	0.497896
YER102W	5.97854	5.81367	5.82505	6.26346	6.25437	5.85282
YER103W	0.443948	0.517909	0.504416	0.526769	0.505334	0.573642
YER104W	0.654599	0.712811	0.707087	0.655655	0.591306	0.655281
YER105C	0.73881	0.744022	0.701608	0.675414	0.713086	0.71367
YER106W	0.220785	0.211654	0.192256	0.187977	0.183257	0.214051
YER107C	0.838892	0.93398	0.960969	0.940955	0.835722	0.824857
YER109C	0.565427	0.599834	0.566594	0.582138	0.569844	0.606638
YER110C	1.15532	1.18051	1.13952	1.06981	1.02418	0.989291
YER111C	0.514883	0.487604	0.454951	0.520108	0.555147	0.572812
YER112W	0.949076	0.871295	0.904629	0.874685	0.924993	0.934794
YER113C	0.757696	0.781884	0.795104	0.682686	0.676486	0.714946
YER114C	0.610349	0.668506	0.642014	0.698084	0.64739	0.661436
YER115C	0.841535	0.844884	0.759405	0.630249	0.634317	0.696688
YER116C	0.744672	0.882761	0.941605	0.819802	0.743793	0.780175
YER117W	6.2567	5.86326	5.91875	6.55583	6.50124	6.12815
YER118C	0.952722	1.03479	1.00456	1.09395	1.0796	1.04318
YER119C	0.702573	0.773084	0.859644	0.938077	0.840915	0.914464
YER120W	1.38637	1.50021	1.55891	1.65239	1.55989	1.59896
YER122C	1.28988	1.24696	1.2432	1.37034	1.36548	1.36129
YER123W	0.798702	0.832097	0.811079	0.845469	0.835522	0.860628
YER124C	2.1549	1.9938	2.0874	2.88725	2.99883	2.92784
YER125W	0.942458	1.00868	0.981255	1.08687	1.03624	1.09334
YER126C	1.80918	1.85418	1.86639	1.76473	1.65467	1.48857
YER127W	1.30856	1.40186	1.34619	1.14398	1.04107	0.950536
YER129W	0.68546	0.706781	0.676278	0.709679	0.698505	0.69731
YER131W	5.55063	5.16467	5.23876	5.41421	5.57052	5.17952
YER132C	0.766474	0.780754	0.773901	0.726367	0.723721	0.730141
YER133W	1.55319	1.43113	1.37671	1.62143	1.67354	1.72726
YER136W	0.899866	0.949514	0.904567	0.980937	0.969413	1.08627
YER139C	0.570968	0.55153	0.529378	0.60861	0.599762	0.626058
YER141W	0.849782	0.870426	0.859461	1.06464	1.00849	1.13431
YER142C	0.440051	0.396316	0.358021	0.378126	0.426974	0.427676
YER143W	0.756654	0.839211	0.829829	0.849143	0.782443	0.827802
YER144C	0.663367	0.682697	0.619957	0.890948	0.868872	0.889688
YER145C	1.88751	2.08722	2.40468	1.9733	1.82383	1.7526
YER146W	1.28354	1.35086	1.46472	1.22452	1.25637	1.18716
YER147C	0.656877	0.755258	0.767008	0.736044	0.675141	0.677076
YER148W	1.40763	1.398	1.32041	1.47281	1.47227	1.44648
YER149C	0.707768	0.732188	0.712773	0.654434	0.65624	0.662175
YER150W	0.461112	0.532578	0.533063	0.691431	0.576683	0.642948
YER151C	0.758226	0.811532	0.779688	0.813913	0.780142	0.815445
YER152C	0.727885	0.840234	0.909639	0.897602	0.776489	0.763434
YER153C	0.675928	0.753103	0.826545	0.653446	0.582604	0.597198
YER154W	1.29888	1.39923	1.41976	1.40695	1.27401	1.23048
YER155C	0.888696	0.867925	0.831585	0.928399	0.951284	0.944816
YER157W	0.588453	0.582918	0.562952	0.555478	0.562111	0.583756
YER159C	1.36206	1.35093	1.40654	1.81861	1.80215	1.78269
YER161C	0.701218	0.76897	0.767253	0.840766	0.772799	0.825915
YER162C	0.414124	0.435352	0.460908	0.463899	0.452456	0.488432
YER164W	0.5825	0.605614	0.582911	0.562711	0.550595	0.578614
YER165W	2.25428	2.36968	2.40218	2.53133	2.32139	2.1732
YER166W	0.627999	0.659274	0.644214	0.692391	0.6822	0.696529
YER167W	0.698618	0.789451	0.778132	0.917884	0.855112	0.85338
YER168C	0.686277	0.652651	0.645673	0.62278	0.641517	0.647807
YER169W	0.584053	0.580744	0.557082	0.573071	0.54745	0.568108
YER170W	0.690048	0.716159	0.712867	0.700709	0.662085	0.695045
YER171W	0.680469	0.675286	0.636024	0.650741	0.677812	0.684664
YER172C	0.581962	0.589413	0.551115	0.591835	0.586891	0.603866
YER173W	0.592888	0.61988	0.629664	0.605364	0.58461	0.584376
YER174C	0.791583	0.803296	0.749075	0.707676	0.703349	0.712209
YER175C	0.60959	0.636585	0.589533	0.5439	0.590964	0.608379
YER176W	1.20362	1.19414	1.19636	1.08364	1.13198	1.13005
YER177W	3.32697	3.46241	3.70642	4.1519	3.93397	4.27074
YER178W	1.10075	1.26924	1.36755	1.44796	1.32378	1.38819
YER179W	0.299955	0.311459	0.319204	0.373787	0.406658	0.417938
YER180C	0.717599	0.668539	0.608784	0.627679	0.667247	0.678641
YER180C-A	0.848939	0.79614	0.782934	0.822843	0.748568	0.824636
YER183C	0.629663	0.616806	0.632802	0.605242	0.581015	0.613851
YER185W	0.281408	0.26256	0.266271	0.273754	0.292115	0.284498
YER190W	0.77134	0.882645	0.894373	0.821238	0.759259	0.83551
YFL062W	0.330543	0.327724	0.324262	0.445461	0.444658	0.499161
YFL060C	0.501045	0.513636	0.513493	0.444447	0.482126	0.490429
YFL059W	0.424965	0.521369	0.523696	0.469714	0.41939	0.475876
YFL058W	0.312142	0.379417	0.39273	0.387522	0.329529	0.359397
YFL057C	0.786184	0.851083	0.880857	0.891922	0.775439	0.895795
YFL056C	0.872303	0.955714	0.859762	0.962539	0.867065	0.901828
YFL055W	0.430052	0.45124	0.468884	0.453532	0.42733	0.462638
YFL053W	0.369931	0.444781	0.451798	0.435874	0.401401	0.427417
YFL050C	0.589861	0.626992	0.602978	0.713693	0.667093	0.675306
YFL049W	0.707677	0.685535	0.690038	0.864114	0.866041	0.864705
YFL048C	0.885055	0.899158	0.909889	1.09383	1.07529	1.08871
YFL047W	0.719744	0.709049	0.703083	0.786254	0.800565	0.77648
YFL045C	3.6681	3.52158	3.59695	3.34616	3.259	3.24179
YFL044C	1.64062	1.72762	1.85193	1.47992	1.34678	1.3569
YFL041W	0.705621	0.778864	0.817138	0.665035	0.586402	0.65932
YFL039C	4.6279	4.76485	5.00984	5.71449	5.44173	5.35413
YFL038C	2.30366	2.56657	2.88717	2.93618	2.59615	2.65485
YFL037W	1.63544	1.85336	2.02387	1.79816	1.59432	1.59685
YFL036W	0.856382	0.868708	0.833793	0.867419	0.892709	0.865928
YFL034C-B	1.2899	1.33062	1.28216	1.15466	1.19714	1.15131
YFL034C-A	9.06305	7.92564	8.12461	8.32669	8.69025	7.97678
YFL033C	0.657861	0.713412	0.713173	0.656723	0.63437	0.651485
YFL031W	5.05712	5.12766	5.69451	6.27263	5.80917	5.75423
YFL030W	0.554623	0.626113	0.625663	0.57024	0.552481	0.593919
YFL029C	0.5844	0.607563	0.627872	0.56385	0.559063	0.529047
YFL028C	0.736566	0.774311	0.836	0.708592	0.690735	0.713318
YFL027C	0.861912	0.852457	0.834917	0.816307	0.829836	0.826438
YFL026W	5.4195	5.16001	5.94343	5.96368	5.66296	5.32422
YFL025C	0.958746	0.939973	0.930946	0.930773	0.947457	0.9244
YFL024C	1.5484	1.51472	1.47267	1.57111	1.58992	1.53345
YFL023W	0.879913	0.885442	0.853012	0.713036	0.734999	0.702845
YFL022C	1.98691	2.15724	2.09834	1.95354	1.8578	1.7573
YFL021W	2.10397	2.31424	2.48498	2.60409	2.50484	2.42622
YFL020C	0.280891	0.324413	0.306255	0.389062	0.32	0.413617
YFL018C	1.22507	1.30735	1.31062	1.45781	1.37318	1.44339
YFL017W-A	1.80923	1.55812	1.44412	1.25032	1.40434	1.3482
YFL017C	1.33102	1.29531	1.34731	1.19847	1.26293	1.21858
YFL016C	1.59865	1.91428	1.90868	1.82855	1.66416	1.7723
YFL014W	0.454836	0.533749	0.49106	2.62463	2.29039	2.94198
YFL013C	0.817126	0.840968	0.8708	0.953056	0.929733	0.949586
YFL011W	0.26528	0.285283	0.280522	0.256845	0.249783	0.285864
YFL010W-A	0.969568	1.01934	1.12303	1.11729	1.06286	1.08193
YFL010C	1.10523	1.23439	1.42658	1.36472	1.15178	1.18294
YFL009W	0.804667	0.796688	0.803251	0.733756	0.72161	0.729689
YFL008W	0.822495	0.789128	0.733266	0.720814	0.762942	0.748091
YFL007W	0.861109	0.901063	0.843209	0.773686	0.766313	0.788708
YFL005W	1.83077	1.99295	2.08821	1.79191	1.69041	1.66009
YFL004W	1.44361	1.41871	1.32682	1.42998	1.50031	1.44733
YFL003C	0.398746	0.391352	0.362289	0.324882	0.355628	0.371194
YFL002C	1.06349	1.03798	0.95064	0.872564	0.879443	0.868748
YFL001W	1.00321	1.03186	0.994176	0.932952	0.92673	0.915108
YFR001W	1.59296	1.36702	1.32642	1.23547	1.24352	1.17755
YFR002W	1.27533	1.22858	1.18481	1.1235	1.16154	1.15968
YFR003C	1.11525	1.15207	1.16503	1.2221	1.18978	1.28776
YFR004W	1.92628	1.9928	2.11443	2.09521	1.99325	1.9865
YFR005C	1.30404	1.18759	1.13425	1.04263	1.15162	1.108
YFR007W	0.710281	0.711161	0.701352	0.746063	0.762971	0.751991
YFR008W	0.513032	0.546016	0.546907	0.573596	0.565108	0.576287
YFR009W	1.32115	1.34756	1.32035	1.34557	1.29358	1.29138
YFR010W	1.24201	1.20268	1.14054	1.19116	1.30493	1.29977
YFR011C	1.17331	0.998929	1.00161	0.930648	0.995059	1.03233
YFR013W	0.745206	0.753132	0.737276	0.739756	0.739281	0.747088
YFR014C	0.972945	0.964533	0.901142	0.909512	0.892652	0.981517
YFR015C	0.441972	0.515525	0.530173	1.00749	0.953069	1.24015
YFR016C	0.583767	0.60611	0.567986	0.612906	0.577108	0.644203
YFR019W	0.594686	0.633353	0.620629	0.655235	0.659585	0.666172
YFR021W	0.777164	0.888818	0.960851	0.858892	0.796657	0.847264
YFR022W	0.552724	0.588084	0.609202	0.586964	0.563551	0.598577
YFR023W	0.293781	0.246937	0.231203	0.200326	0.221363	0.236724
YFR024C-A	0.840647	0.894766	0.865042	0.80596	0.767253	0.783243
YFR025C	0.786467	0.810888	0.903627	0.767923	0.704207	0.726999
YFR026C	0.522253	0.526109	0.536338	0.515534	0.496372	0.527566
YFR027W	0.696078	0.760043	0.776743	0.752637	0.713146	0.710211
YFR028C	1.13561	1.18797	1.21694	1.1749	1.14341	1.12136
YFR029W	0.771272	0.824137	0.918399	0.754806	0.699066	0.694452
YFR030W	0.86659	0.954718	0.930368	0.837147	0.795196	0.808297
YFR031C	0.767002	0.752223	0.726367	0.742447	0.766035	0.771072
YFR031C-A	6.71169	7.07529	7.38022	6.81562	6.23942	5.66806
YFR032C-A	10.4875	9.59989	10.0612	10.1535	10.0682	9.12428
YFR033C	4.54134	4.72445	5.4119	5.06374	4.55726	4.60081
YFR034C	2.58516	3.09952	3.5228	2.52327	2.15889	2.09043
YFR036W	1.26429	1.37103	1.52527	1.03323	1.07256	1.00899
YFR037C	1.29144	1.406	1.45922	1.37466	1.25784	1.23411
YFR038W	0.677488	0.651909	0.619614	0.547411	0.562978	0.560033
YFR040W	1.29309	1.23696	1.22576	1.22984	1.24619	1.17328
YFR041C	0.953896	0.856429	0.893573	0.939032	0.952256	0.961677
YFR042W	0.794401	0.768705	0.770822	0.819566	0.786449	0.821131
YFR043C	0.907405	0.802744	0.75347	0.683465	0.720211	0.769845
YFR044C	1.1451	1.25014	1.28591	1.38731	1.26181	1.2972
YFR046C	0.715633	0.710064	0.746261	0.689811	0.633169	0.658013
YFR047C	0.739739	0.755592	0.814651	0.70475	0.673484	0.699622
YFR048W	0.780144	0.782861	0.782163	0.758065	0.728045	0.741607
YFR049W	1.10773	1.1411	1.24281	1.28839	1.20122	1.29635
YFR050C	1.73235	1.7988	1.90814	1.9945	1.85321	1.8152
YFR051C	1.56051	1.68168	1.76912	1.64182	1.47382	1.48463
YFR052W	1.66034	1.55508	1.62184	1.9084	1.91378	1.95833
YFR053C	0.609249	0.695449	0.775985	2.95207	2.77776	3.84377
YGL263W	3.03577e-17	0	6.72205e-17	0.000284222	0.000155594	4.85795e-05
YGL258W	0.246453	0.290424	0.304128	0.297386	0.297684	0.328137
YGL257C	0.673535	0.63067	0.597428	0.589752	0.645138	0.632828
YGL256W	1.0105	1.10916	1.16868	1.14173	0.998719	0.997241
YGL255W	0.813117	0.898604	0.946013	1.06894	0.93867	0.939321
YGL254W	0.780106	0.888366	0.97697	0.901689	0.847846	0.878382
YGL253W	4.19906	4.46218	4.77102	3.28933	3.0413	3.02922
YGL252C	0.787136	0.8159	0.793596	0.794513	0.802355	0.81736
YGL251C	0.408554	0.397278	0.371943	0.422737	0.454685	0.461651
YGL250W	0.429454	0.462168	0.517644	0.488299	0.473643	0.513914
YGL249W	0.474925	0.414437	0.395376	0.424727	0.454054	0.457429
YGL248W	0.679767	0.725295	0.691654	0.999026	0.941156	1.07036
YGL247W	1.11223	1.11848	1.07696	1.02004	1.03325	1.09018
YGL246C	0.795583	0.79752	0.748746	0.740097	0.744389	0.72537
YGL245W	1.15262	1.22487	1.26234	1.1926	1.09902	1.09596
YGL244W	0.66519	0.716095	0.69241	0.715435	0.713121	0.73882
YGL243W	0.509124	0.510651	0.493913	0.516109	0.506744	0.521184
YGL241W	0.493215	0.497696	0.502262	0.448556	0.478929	0.470384
YGL240W	0.708238	0.76018	0.743352	0.665699	0.653464	0.683929
YGL238W	1.04194	0.964429	0.944355	0.947309	1.01215	0.99692
YGL237C	0.537386	0.618264	0.650761	0.660428	0.577607	0.668956
YGL236C	0.62214	0.728959	0.772732	0.638425	0.546138	0.572981
YGL234W	0.977653	1.10878	1.1244	1.06431	0.915234	0.912182
YGL233W	0.499893	0.471682	0.436854	0.445056	0.514767	0.499184
YGL232W	0.78321	0.746957	0.720768	0.646659	0.698991	0.72204
YGL231C	0.943667	0.913892	0.979687	1.06865	1.01962	1.04185
YGL229C	0.312032	0.301406	0.298365	0.294631	0.308143	0.319201
YGL228W	0.748251	0.821099	0.810879	0.798633	0.747016	0.829554
YGL227W	0.451845	0.470129	0.464743	0.487069	0.486369	0.549197
YGL226C-A	0.941207	0.89515	0.965367	0.903947	0.865122	0.922773
YGL226W	1.01365	0.966232	1.04506	0.956761	0.969523	0.970754
YGL225W	2.00218	2.11201	2.17606	2.05538	1.94307	1.94152
YGL224C	1.17867	1.24316	1.20896	1.21288	1.18851	1.19967
YGL223C	0.686651	0.715066	0.709449	0.701178	0.716008	0.721423
YGL222C	1.16883	1.08204	1.06595	1.2825	1.28339	1.27481
YGL221C	0.955248	1.13475	1.17588	1.12025	1.00605	0.986641
YGL220W	0.831405	0.928356	1.01364	0.932219	0.79818	0.859852
YGL219C	0.806193	0.807512	0.856184	0.874239	0.813342	0.855925
YGL216W	0.671642	0.716481	0.721309	0.720086	0.714211	0.732321
YGL215W	1.48071	1.48501	1.46647	1.45685	1.48105	1.36178
YGL213C	0.698828	0.675358	0.659794	0.647395	0.643731	0.667061
YGL212W	0.568696	0.640787	0.683783	0.674421	0.609646	0.645638
YGL211W	1.10133	1.22008	1.21166	1.21605	1.0382	1.04905
YGL210W	1.68275	1.80964	1.84554	1.45177	1.36694	1.31212
YGL209W	1.91669	2.09944	2.32803	1.51466	1.34309	1.35218
YGL208W	0.611616	0.699662	0.691655	0.594382	0.542188	0.594619
YGL207W	1.04119	1.00701	0.942007	0.999932	1.04749	1.01558
YGL206C	0.853702	0.876404	0.836072	0.939213	0.965064	1.0221
YGL205W	0.368275	0.37881	0.373556	0.330073	0.337433	0.353414
YGL203C	0.620885	0.643795	0.658571	0.6106	0.575091	0.605506
YGL202W	1.13966	1.20326	1.19791	1.2208	1.15287	1.10847
YGL201C	0.604869	0.66932	0.663883	0.645255	0.609681	0.65219
YGL200C	1.40182	1.51254	1.67539	1.41364	1.26289	1.30806
YGL198W	1.23108	1.48336	1.60979	1.49455	1.33659	1.4467
YGL197W	0.595685	0.65405	0.629146	0.726346	0.697698	0.753228
YGL196W	1.04154	1.07402	1.10243	1.0448	0.967437	1.01895
YGL195W	0.890942	0.927181	0.882494	0.918833	0.89118	0.910211
YGL194C	0.900322	0.909704	0.921995	0.876824	0.887	0.914922
YGL192W	1.09522	1.08204	1.04825	1.14203	1.10741	1.17083
YGL191W	1.58104	1.5567	1.68741	1.94158	1.95244	1.98166
YGL190C	1.19977	1.17944	1.1052	1.08276	1.06676	1.14897
YGL189C	7.25428	6.62035	6.7766	7.14102	7.15373	6.84656
YGL187C	1.84882	1.78594	1.82933	1.88877	1.87108	1.92764
YGL186C	0.845482	0.896773	0.886593	0.863065	0.798283	0.838777
YGL184C	0.287794	0.345603	0.342016	0.383831	0.362971	0.39524
YGL183C	0.218309	0.206977	0.175312	0.182188	0.208834	0.227547
YGL181W	0.682822	0.729328	0.74857	0.83614	0.753512	0.799485
YGL180W	0.385662	0.376598	0.373212	0.352677	0.355594	0.395757
YGL179C	0.426202	0.44794	0.455336	0.461497	0.476047	0.50749
YGL178W	0.923654	0.879183	0.841391	0.897432	0.917029	0.88624
YGL175C	0.643585	0.59904	0.587055	0.547168	0.550295	0.592894
YGL174W	0.812589	0.80278	0.786431	0.678467	0.687469	0.730544
YGL173C	1.0049	1.0006	0.917252	0.980689	1.01767	1.03645
YGL172W	0.944445	1.02412	1.02989	0.919708	0.839003	0.895647
YGL171W	0.901888	0.869614	0.86599	0.698181	0.677728	0.679974
YGL170C	0.328585	0.329034	0.285408	0.222436	0.249436	0.25621
YGL169W	0.717656	0.748339	0.741627	0.674371	0.6279	0.64094
YGL168W	1.3906	1.41654	1.35875	1.22273	1.29104	1.17428
YGL167C	1.10191	1.14712	1.12645	1.19538	1.18019	1.1526
YGL166W	0.608293	0.783941	0.791378	0.689755	0.626268	0.667873
YGL164C	0.638394	0.634343	0.635829	0.628549	0.608022	0.645116
YGL163C	0.527032	0.571402	0.555992	0.526684	0.496341	0.544049
YGL162W	1.21095	1.31052	1.45792	1.38252	1.22844	1.29637
YGL161C	0.800904	0.936362	0.992592	1.00939	0.964182	1.0102
YGL160W	0.508871	0.479612	0.460983	0.52493	0.541531	0.568717
YGL158W	0.208763	0.240322	0.232211	0.269577	0.249058	0.277292
YGL157W	0.648123	0.649657	0.61292	0.769295	0.771047	0.858212
YGL156W	0.579436	0.62557	0.586094	0.606803	0.605987	0.633865
YGL155W	0.648186	0.672195	0.734301	0.689145	0.647656	0.639576
YGL154C	0.765946	0.793719	0.764522	0.758853	0.694745	0.752827
YGL153W	0.654147	0.656873	0.613341	0.561957	0.57449	0.599209
YGL151W	0.6309	0.597509	0.575276	0.614622	0.675986	0.680076
YGL150C	0.675766	0.729777	0.720038	0.742689	0.723322	0.750326
YGL148W	1.50447	1.69826	1.83851	1.41795	1.26217	1.20266
YGL147C	5.88932	5.88166	6.96548	6.73122	5.95787	5.60115
YGL145W	0.511271	0.502635	0.478565	0.537231	0.530263	0.546162
YGL144C	0.496557	0.52537	0.510034	0.490661	0.475973	0.492636
YGL143C	0.523188	0.576685	0.574752	0.540941	0.497177	0.540154
YGL142C	0.48543	0.499843	0.465613	0.435889	0.440648	0.48166
YGL141W	0.428768	0.422101	0.392578	0.464155	0.455408	0.509851
YGL139W	0.512231	0.551651	0.528758	0.537711	0.52026	0.5366
YGL137W	1.10672	1.16021	1.14213	1.15753	1.0825	1.09644
YGL136C	0.96529	0.954855	0.918132	0.784327	0.834074	0.845934
YGL135W	7.63759	7.87225	8.65776	8.85623	8.02831	7.6426
YGL134W	0.982157	0.982386	0.96249	0.964031	0.97555	0.999633
YGL133W	0.784889	0.767003	0.720314	0.784532	0.826031	0.824892
YGL131C	0.490075	0.51458	0.473662	0.563386	0.572006	0.599705
YGL130W	0.605827	0.628498	0.62319	0.650378	0.656556	0.666353
YGL129C	0.664945	0.663039	0.640936	0.628985	0.658371	0.680506
YGL128C	0.670024	0.730426	0.783219	0.66623	0.608853	0.63938
YGL127C	1.0125	1.04875	1.09848	1.01525	1.01733	1.0358
YGL126W	0.832133	1.00283	1.17894	1.09904	0.944413	0.907934
YGL125W	0.894633	1.07393	1.15266	1.0418	0.946695	1.00284
YGL124C	0.515497	0.511319	0.499048	0.490998	0.503286	0.526249
YGL123W	8.37231	8.72014	9.36582	9.84399	8.72362	8.26667
YGL122C	2.03796	2.2015	2.22876	2.42624	2.21977	2.22904
YGL121C	1.01892	1.04418	1.09699	1.25466	1.10214	1.2475
YGL120C	1.12884	1.17826	1.12764	1.02029	0.949026	0.886893
YGL119W	0.483427	0.468054	0.41263	0.401508	0.407012	0.441082
YGL116W	0.784757	0.839857	0.855344	0.945276	0.916804	0.932567
YGL115W	1.02575	1.04352	1.11199	1.18041	1.09946	1.16376
YGL113W	0.507174	0.519247	0.483512	0.461504	0.456894	0.486034
YGL112C	0.670406	0.694348	0.65754	0.684458	0.645702	0.682458
YGL111W	0.976809	0.931086	0.863672	0.816524	0.822305	0.764517
YGL110C	0.701291	0.696582	0.617423	0.617611	0.663998	0.69719
YGL107C	0.836635	0.872247	0.870575	0.803569	0.809402	0.823344
YGL106W	1.51418	1.70039	1.8197	1.57962	1.2759	1.3831
YGL105W	1.83627	1.88347	1.92413	2.04624	1.89992	1.85005
YGL104C	0.468558	0.496172	0.470329	0.482157	0.4627	0.481301
YGL103W	13.9838	12.9946	13.6805	13.415	13.4107	12.6758
YGL100W	0.7836	0.791662	0.821277	0.78208	0.744404	0.78616
YGL099W	0.857049	0.829728	0.803618	0.695567	0.676338	0.673966
YGL098W	0.771923	0.79867	0.798594	0.802715	0.779297	0.774088
YGL097W	1.00085	1.11848	1.1456	1.07944	0.966423	0.994244
YGL096W	0.356283	0.36902	0.349509	0.402247	0.442136	0.471051
YGL095C	0.501777	0.485037	0.461185	0.536816	0.580548	0.57281
YGL094C	0.596935	0.626741	0.602163	0.624498	0.603355	0.632097
YGL093W	0.500051	0.541237	0.527147	0.560543	0.545723	0.590082
YGL092W	0.894148	0.883206	0.806225	0.835249	0.842238	0.844287
YGL091C	0.778727	0.779523	0.832573	0.824503	0.812189	0.830134
YGL090W	0.474227	0.511827	0.501417	0.505531	0.523128	0.525376
YGL089C	0.47535	0.530941	0.507733	0.489099	0.42866	0.462976
YGL087C	3.57908	3.4955	3.66313	3.10225	3.18531	3.08171
YGL086W	0.60554	0.567095	0.527175	0.564664	0.620178	0.609477
YGL084C	0.57745	0.546991	0.522214	0.538501	0.567573	0.598457
YGL083W	0.70384	0.703999	0.66304	0.704414	0.714757	0.751996
YGL078C	1.62989	1.62255	1.59581	1.42713	1.33644	1.28187
YGL077C	1.97506	2.06161	2.09843	1.61689	1.51566	1.47222
YGL076C	5.79384	5.4758	5.55743	5.74581	5.98599	5.42641
YGL075C	0.549079	0.595461	0.580906	0.527726	0.492674	0.52025
YGL073W	1.14227	1.19766	1.21521	1.07528	1.05976	1.04173
YGL071W	1.22941	1.31106	1.33111	1.10578	1.0425	1.03974
YGL070C	1.25674	1.28805	1.28771	1.21356	1.21224	1.33809
YGL068W	1.25271	1.36642	1.35658	1.35923	1.26189	1.33543
YGL067W	0.824655	0.831442	0.790388	0.720897	0.722314	0.739908
YGL066W	0.689274	0.753832	0.75441	0.762419	0.71135	0.751348
YGL065C	0.715349	0.649424	0.614368	0.664943	0.679106	0.665346
YGL064C	0.570231	0.569994	0.545881	0.557681	0.58761	0.580341
YGL063W	0.755121	0.893238	0.964355	0.775038	0.709834	0.71256
YGL062W	0.885135	1.01431	0.891329	0.972089	0.927472	0.953421
YGL061C	0.60713	0.578753	0.598229	0.602548	0.58507	0.613942
YGL060W	0.476161	0.504577	0.493554	0.501343	0.487965	0.527131
YGL059W	0.544611	0.521917	0.534226	0.54357	0.562629	0.595023
YGL058W	1.14443	1.18585	1.24613	1.20755	1.17561	1.16722
YGL057C	0.718616	0.667588	0.664791	0.568008	0.608269	0.587103
YGL056C	1.48285	1.53773	1.60618	1.45135	1.31262	1.32249
YGL055W	3.40825	3.41603	3.95405	3.70923	3.4594	3.24795
YGL054C	1.70834	1.49548	1.64013	1.63225	1.70438	1.73809
YGL053W	0.703792	0.719528	0.71791	0.852123	0.785343	0.875242
YGL051W	0.532028	0.619056	0.615894	0.594365	0.567854	0.593361
YGL050W	0.857682	0.858545	0.812729	0.815012	0.835827	0.834369
YGL049C	0.551854	0.583365	0.569658	0.716297	0.689517	0.73286
YGL048C	1.13196	1.16527	1.19984	1.29148	1.26316	1.31282
YGL047W	1.26019	1.19682	1.25663	1.0655	1.0282	1.11207
YGL045W	0.434725	0.488711	0.495114	0.59032	0.54682	0.620905
YGL044C	0.662904	0.66387	0.678603	0.748276	0.715692	0.756263
YGL043W	1.00102	1.07176	1.13011	1.12492	0.99118	0.976299
YGL040C	1.34319	1.4823	1.53198	1.2764	1.11423	1.19912
YGL039W	0.728201	0.709779	0.691566	0.595275	0.614238	0.639576
YGL038C	1.08268	1.07232	1.04113	0.967032	0.999508	1.03209
YGL037C	1.22618	1.40028	1.53559	2.25154	2.05831	2.81615
YGL035C	0.9934	1.08726	1.18051	1.21716	1.12414	1.18015
YGL033W	0.293155	0.292705	0.251822	0.30144	0.317601	0.345347
YGL032C	0.790062	0.830818	0.894381	1.0627	1.05575	1.10929
YGL031C	4.91145	4.53593	4.38178	4.54544	4.83727	4.52002
YGL030W	8.89519	7.99051	8.51052	8.37426	8.61922	8.12781
YGL029W	1.41737	1.19074	1.1785	0.982093	0.983252	0.959304
YGL028C	3.1779	3.22176	3.82566	4.80914	4.43021	4.23887
YGL027C	0.633993	0.675296	0.649594	0.655136	0.66834	0.67453
YGL026C	0.988092	1.13282	1.17066	1.12653	1.03639	1.03589
YGL025C	0.796439	0.874711	0.971392	0.839414	0.801665	0.795038
YGL023C	0.628777	0.747124	0.814471	0.831635	0.695662	0.732826
YGL022W	1.12411	1.24208	1.26245	1.32519	1.1962	1.24343
YGL021W	0.815689	0.782343	0.753936	1.10873	1.14318	1.16231
YGL020C	0.849963	0.852504	0.893714	0.962726	0.989921	0.966093
YGL019W	1.03902	1.12961	1.16939	1.13039	1.03539	1.04936
YGL018C	0.61646	0.724141	0.731206	0.731573	0.652189	0.722092
YGL017W	0.586886	0.632321	0.6161	0.603463	0.547854	0.574329
YGL016W	0.589632	0.572768	0.567021	0.519468	0.531457	0.558555
YGL014W	0.986681	1.01261	0.963229	0.991359	0.995586	0.989988
YGL013C	0.683021	0.673544	0.643114	0.691304	0.693534	0.702822
YGL012W	1.23733	1.3328	1.32962	1.27081	1.21343	1.25548
YGL011C	1.53254	1.65619	1.63917	1.78363	1.74329	1.73748
YGL009C	2.34238	2.59494	2.66184	2.29847	2.15316	2.11192
YGL008C	15.1277	15.3692	16.4907	16.0652	15.3257	14.8163
YGL006W	0.442351	0.462298	0.434653	0.553175	0.575658	0.628068
YGL005C	0.59737	0.574408	0.595728	0.598108	0.608404	0.620034
YGL004C	0.580954	0.601966	0.561814	0.550902	0.558017	0.575745
YGL003C	0.806992	0.885515	0.923867	0.880602	0.807202	0.860574
YGL002W	0.68465	0.689875	0.717274	0.699534	0.709185	0.73464
YGL001C	0.848054	0.871837	0.88557	0.888059	0.850798	0.871527
YGR002C	0.680013	0.676659	0.625424	0.696038	0.697444	0.733916
YGR003W	0.522572	0.513825	0.505089	0.484194	0.502084	0.503831
YGR004W	0.51658	0.559977	0.545256	0.491624	0.47923	0.509219
YGR005C	0.681138	0.679041	0.681812	0.703753	0.692734	0.703619
YGR006W	0.933338	0.950936	0.964675	1.02548	1.03014	1.03315
YGR007W	1.08017	1.18175	1.13138	1.42564	1.39366	1.46909
YGR008C	1.1858	1.17689	1.30871	2.25708	2.26018	2.67134
YGR009C	0.633047	0.719624	0.707957	0.805189	0.760837	0.830109
YGR010W	0.763928	0.855246	0.887184	0.790865	0.755104	0.79641
YGR012W	0.69121	0.817722	0.815601	0.761523	0.669425	0.706504
YGR013W	0.761773	0.81781	0.846597	0.881912	0.826628	0.879438
YGR014W	1.47943	1.7215	1.74627	2.21714	2.00857	2.05439
YGR019W	0.615057	0.7055	0.735449	0.964359	0.927481	1.06119
YGR020C	1.14401	1.24564	1.36841	1.49732	1.36958	1.51545
YGR023W	0.50804	0.582273	0.657475	0.804738	0.716449	0.804306
YGR024C	0.763044	0.691465	0.700043	0.709796	0.729817	0.79633
YGR027C	6.42914	5.96976	6.02545	6.57103	6.73963	6.33651
YGR028W	0.530012	0.550895	0.539045	0.640027	0.660732	0.706757
YGR029W	0.71986	0.745114	0.752406	0.778355	0.737595	0.818078
YGR030C	2.32896	1.95537	2.01477	1.69025	1.87371	1.6944
YGR031C-A	0.975518	1.17353	1.25433	1.17307	1.00194	1.00263
YGR032W	0.579325	0.599846	0.569757	1.10642	1.06221	1.07424
YGR033C	1.07379	1.05857	1.06437	1.07492	1.0712	1.06143
YGR034W	4.54484	4.06777	4.00415	4.41311	4.64437	4.29211
YGR036C	0.792471	0.770005	0.762315	0.734618	0.761001	0.758069
YGR037C	1.95815	2.08696	2.18941	1.89711	1.91343	1.89329
YGR038W	1.12305	1.11083	1.08686	1.06805	1.06062	1.12042
YGR040W	1.45829	1.45696	1.4766	1.55936	1.52414	1.51808
YGR041W	1.06717	1.0981	1.13638	1.06923	1.09836	1.09408
YGR043C	0.305538	0.312774	0.300344	0.325331	0.319617	0.360834
YGR044C	0.58313	0.608938	0.634997	0.94848	0.92302	0.91628
YGR046W	0.661639	0.644244	0.630782	0.775461	0.822706	0.851521
YGR047C	0.480886	0.473622	0.456269	0.497185	0.497911	0.508971
YGR048W	0.761214	0.813582	0.797762	0.881049	0.883183	0.913983
YGR049W	1.14878	1.07234	1.22112	1.26181	1.21304	1.27139
YGR054W	1.64666	1.63379	1.55915	1.56375	1.54381	1.52433
YGR055W	4.16488	4.29372	4.49086	3.82381	3.84265	3.87401
YGR056W	0.807407	0.808835	0.744901	0.7823	0.827154	0.818068
YGR057C	0.677729	0.606665	0.611137	0.565722	0.573256	0.587839
YGR058W	0.605734	0.671344	0.702689	0.629702	0.616199	0.605376
YGR059W	0.367757	0.352476	0.335359	0.311915	0.325447	0.35289
YGR060W	3.67395	3.77898	4.47663	4.31458	3.95239	3.79847
YGR061C	1.0399	1.11674	1.09305	1.09561	1.03344	1.03421
YGR062C	1.3901	1.43525	1.4386	1.49585	1.51493	1.53392
YGR063C	1.51748	1.64941	1.89213	1.82782	1.61772	1.69854
YGR065C	0.841784	0.88338	0.900109	0.852183	0.801813	0.815496
YGR068C	0.577775	0.611623	0.627271	0.66403	0.622644	0.66097
YGR070W	0.385788	0.384075	0.367525	0.617547	0.654158	0.732071
YGR072W	0.645685	0.581306	0.577681	0.588661	0.652521	0.672058
YGR074W	1.41212	1.51209	1.51413	1.50717	1.34618	1.37303
YGR075C	1.01277	0.980589	0.926135	0.887612	0.942405	0.915459
YGR076C	0.912846	0.807986	0.757057	0.831185	0.803313	0.866788
YGR077C	0.779745	0.852429	0.837243	0.729818	0.73992	0.740391
YGR078C	1.52704	1.60239	1.55359	1.39726	1.27952	1.26929
YGR080W	1.03183	1.05966	1.01586	0.992896	0.954524	0.941354
YGR081C	1.41003	1.38526	1.41839	1.35385	1.32756	1.27235
YGR082W	1.17221	1.2676	1.28038	1.24551	1.15025	1.2197
YGR083C	1.02865	1.04276	1.05004	0.981153	0.955721	0.933804
YGR084C	1.3227	1.35695	1.31395	1.16045	1.17189	1.15934
YGR085C	6.53847	6.6791	6.99219	7.19218	6.89855	6.54138
YGR086C	2.25162	2.45858	2.7861	3.55425	3.22017	3.7315
YGR087C	0.300474	0.331452	0.354094	0.368645	0.326362	0.363064
YGR088W	0.532365	0.541472	0.585932	0.610067	0.578993	0.661162
YGR089W	0.728877	0.703892	0.64361	0.687064	0.747322	0.731295
YGR090W	1.10371	1.05468	0.97297	1.14628	1.15309	1.13773
YGR091W	0.839031	0.819108	0.811757	1.05352	1.04543	1.07557
YGR092W	0.825554	0.815711	0.787599	1.18559	1.21154	1.26458
YGR094W	1.56328	1.65292	1.60166	1.52069	1.46591	1.37518
YGR095C	0.926645	1.01662	1.00196	0.957461	0.920619	0.87896
YGR096W	0.624671	0.653174	0.678847	0.69138	0.6109	0.641039
YGR097W	0.524494	0.554374	0.537821	1.00063	0.961668	0.990974
YGR098C	0.434385	0.410441	0.389913	0.421863	0.45255	0.468255
YGR099W	0.553738	0.565924	0.556615	0.586821	0.57708	0.591085
YGR100W	0.469063	0.493671	0.462365	0.510981	0.509328	0.559353
YGR101W	0.718168	0.770468	0.690454	0.72394	0.703631	0.727511
YGR102C	0.693534	0.687241	0.653912	0.837325	0.80879	0.891888
YGR103W	1.55307	1.47486	1.40249	1.26517	1.22292	1.1003
YGR104C	0.71847	0.698535	0.713805	0.718795	0.707291	0.70334
YGR105W	1.10817	1.09294	1.19145	1.00243	1.00917	0.96953
YGR106C	1.198	1.18576	1.23343	1.19893	1.203	1.21161
YGR108W	1.02525	0.995328	1.09147	2.22122	2.31787	2.42822
YGR109C	0.733542	0.645598	0.643691	0.776865	0.828583	0.865253
YGR110W	0.324398	0.341127	0.343538	0.373307	0.389049	0.418382
YGR112W	0.48267	0.54323	0.574351	0.53243	0.463771	0.548892
YGR113W	0.849178	0.853861	0.839351	0.871986	0.836016	0.90028
YGR116W	0.814047	0.816673	0.771183	0.800991	0.82898	0.842228
YGR118W	6.32787	5.96703	6.17898	6.64319	6.52265	6.33275
YGR119C	1.45239	1.44299	1.38333	1.36594	1.39035	1.36582
YGR120C	1.16445	1.16432	1.1402	1.05567	1.11321	1.11372
YGR121C	1.0103	1.13495	1.17565	1.08631	1.02901	1.03024
YGR122W	0.526427	0.580583	0.56327	0.512043	0.521694	0.552979
YGR123C	0.767577	0.758208	0.69602	0.623141	0.627591	0.574312
YGR124W	1.4287	1.58348	1.69225	1.75698	1.55781	1.52555
YGR128C	1.08604	0.997857	0.933397	0.863487	0.915814	0.852646
YGR129W	0.668012	0.631281	0.654178	0.677482	0.568158	0.60535
YGR130C	0.784646	0.846159	0.833109	0.93583	0.906877	1.04755
YGR131W	0.584069	0.567139	0.563205	0.513098	0.538204	0.605676
YGR132C	0.975944	1.04583	1.05133	1.11392	1.00825	1.11973
YGR133W	0.653768	0.695642	0.688057	0.658199	0.631262	0.706242
YGR134W	0.573141	0.608255	0.59243	0.570825	0.555948	0.586407
YGR135W	1.59194	1.59328	1.65514	1.73304	1.70024	1.70485
YGR136W	1.23376	1.31883	1.37655	1.66034	1.5623	1.61106
YGR138C	0.615636	0.687182	0.731407	1.10387	0.968658	1.03016
YGR140W	0.566167	0.550838	0.522788	0.522564	0.552161	0.537776
YGR141W	0.688178	0.747665	0.70918	0.677899	0.671985	0.704725
YGR142W	1.21088	1.1843	1.14401	0.998302	1.04323	1.13853
YGR143W	0.658759	0.737757	0.731416	1.06476	1.02689	1.08038
YGR144W	0.325448	0.37667	0.40988	0.290632	0.277378	0.326879
YGR145W	0.926741	0.903642	0.852984	0.780895	0.747938	0.701544
YGR146C	1.83978	1.84183	1.94253	2.17082	2.12719	2.20377
YGR147C	1.14844	1.20888	1.28475	1.23179	1.05548	1.13076
YGR148C	4.71838	4.44576	4.3852	4.62942	4.58438	4.37435
YGR150C	0.54722	0.536421	0.50202	0.523636	0.553723	0.560695
YGR152C	0.863789	0.877289	0.929091	0.788343	0.772261	0.752715
YGR154C	0.765827	0.73686	0.726865	0.783746	0.810894	0.820093
YGR155W	3.92557	3.96413	3.95966	3.83131	3.74285	3.53002
YGR156W	2.01595	2.04258	2.0288	1.97299	1.98617	1.95117
YGR157W	1.53451	1.45787	1.41199	1.75918	1.89371	1.86719
YGR158C	1.27834	1.38572	1.42547	1.28883	1.20548	1.18077
YGR159C	4.66263	4.47477	4.42913	3.1092	2.83617	2.24333
YGR162W	1.84456	1.91245	1.86609	1.81455	1.73611	1.62799
YGR163W	0.781548	0.831743	0.822847	0.743889	0.754648	0.791992
YGR165W	0.77551	0.750467	0.754955	0.783956	0.802132	0.843598
YGR166W	0.622616	0.608756	0.558787	0.705527	0.771244	0.763185
YGR167W	1.04914	1.11486	1.16364	1.28296	1.18182	1.30373
YGR169C	0.73885	0.795193	0.792277	0.671649	0.63084	0.626112
YGR170W	0.627741	0.623703	0.601184	0.579365	0.578279	0.610005
YGR171C	0.565177	0.573408	0.525673	0.497842	0.520307	0.529866
YGR172C	0.828662	0.846139	0.845381	0.801596	0.809124	0.786858
YGR173W	1.07378	1.09647	1.13904	1.07415	1.0139	1.00906
YGR174C	0.660395	0.745647	0.718539	0.950626	0.925652	0.98334
YGR175C	2.09252	2.27718	2.63737	2.73698	2.43732	2.36951
YGR177C	1.36508	1.44588	1.51008	1.25109	1.22898	1.18219
YGR178C	1.36096	1.4741	1.42268	1.2805	1.26114	1.19323
YGR179C	0.551538	0.598708	0.612169	0.626945	0.627662	0.664003
YGR180C	1.00943	1.05336	1.14176	1.00651	0.954186	1.0227
YGR181W	1.63225	1.78448	1.64048	1.55019	1.60935	1.57851
YGR183C	2.59348	2.68423	2.93435	3.06902	2.9356	3.19638
YGR184C	0.609591	0.624803	0.599461	0.607674	0.628208	0.641073
YGR185C	1.75498	1.71892	1.73374	1.73568	1.7255	1.69093
YGR186W	0.797736	0.790822	0.816566	0.864249	0.805837	0.834435
YGR187C	1.14034	1.00162	0.992791	0.756069	0.808078	0.745412
YGR188C	0.390462	0.406279	0.385729	0.373778	0.386304	0.411753
YGR189C	2.54011	2.76218	2.92632	5.31417	4.6626	4.62682
YGR191W	1.19686	1.23587	1.17803	1.30461	1.23676	1.20324
YGR192C	20.2272	20.5747	24.9793	21.1287	19.1078	19.3062
YGR193C	0.96553	0.975168	1.0488	0.891252	0.879619	0.947827
YGR194C	0.45925	0.460747	0.44852	0.481509	0.507563	0.574302
YGR195W	1.49369	1.51705	1.52511	1.49299	1.4466	1.3909
YGR196C	0.599341	0.624424	0.620117	0.62007	0.56828	0.617671
YGR197C	0.819378	0.889229	0.867234	0.787652	0.76025	0.81203
YGR198W	0.997442	0.977298	0.921428	0.92144	0.949512	0.950806
YGR199W	0.770455	0.776896	0.715638	0.706092	0.664886	0.70632
YGR200C	1.13048	1.10537	1.06926	1.01487	0.992123	0.948114
YGR202C	0.853642	0.893665	0.97479	0.838345	0.754203	0.811534
YGR203W	0.735296	0.93628	1.00338	0.813442	0.764777	0.747805
YGR204W	1.27659	1.57657	1.66096	1.64509	1.42478	1.47171
YGR205W	0.544291	0.542723	0.59331	0.561752	0.590084	0.648366
YGR206W	1.00011	0.907489	0.881557	0.922801	0.984788	1.00162
YGR207C	0.745883	0.728283	0.702914	0.808165	0.829321	0.846984
YGR208W	1.12875	1.10638	1.1706	1.21564	1.1643	1.15615
YGR209C	1.54436	1.63442	1.62004	1.52821	1.51561	1.65809
YGR211W	1.89373	2.06273	2.02332	1.76648	1.62359	1.63669
YGR212W	0.489568	0.486398	0.427696	0.462593	0.472651	0.50428
YGR213C	0.51679	0.49395	0.48935	0.534642	0.550839	0.5851
YGR214W	3.7488	3.72157	3.71326	3.73134	3.58755	3.4194
YGR215W	1.10062	1.07631	0.986467	0.963429	0.99792	0.970784
YGR216C	0.659548	0.629703	0.625904	0.619692	0.648759	0.637666
YGR217W	0.43079	0.427799	0.389604	0.449329	0.453955	0.469657
YGR218W	0.85723	0.827656	0.757696	0.831875	0.859626	0.87682
YGR220C	1.08863	1.09003	1.04172	1.09802	1.08023	1.12857
YGR221C	0.616574	0.610484	0.619474	0.644101	0.627776	0.653264
YGR222W	0.691125	0.679251	0.666774	0.743937	0.779252	0.86599
YGR223C	0.563907	0.631004	0.615977	0.713534	0.720116	0.783978
YGR224W	0.388239	0.405624	0.420407	0.457108	0.427783	0.464733
YGR225W	0.161745	0.16976	0.162729	0.175673	0.184752	0.217703
YGR227W	0.571951	0.566489	0.533685	0.5785	0.599175	0.604912
YGR229C	1.19621	1.26362	1.23038	1.30963	1.25185	1.2059
YGR230W	0.590545	0.595233	0.583431	0.735596	0.783131	0.803913
YGR231C	0.906131	0.969474	0.994546	1.08853	0.958671	1.08941
YGR232W	0.943081	0.941109	0.946785	0.874258	0.935733	0.986702
YGR233C	0.941489	0.9355	0.876356	1.05346	1.12694	1.07505
YGR234W	6.38566	6.30863	7.3039	7.34594	7.02299	6.70533
YGR236C	0.560467	0.634404	0.687096	0.689669	0.637492	0.687811
YGR238C	0.387161	0.406921	0.382369	0.354504	0.35798	0.380747
YGR239C	0.928338	1.02364	1.09529	1.01749	0.959869	0.936119
YGR240C	2.39181	2.60575	2.61237	2.68732	2.45474	2.44991
YGR241C	1.04842	1.13111	1.0785	1.13182	1.11346	1.1186
YGR244C	0.779876	0.823978	0.842881	1.11569	1.01897	1.12639
YGR245C	1.04123	1.05885	1.00595	0.915717	0.869865	0.789408
YGR246C	0.502271	0.516314	0.548851	0.531842	0.494089	0.514624
YGR247W	0.409196	0.457451	0.49427	0.551454	0.439597	0.471186
YGR248W	0.228905	0.29453	0.306765	0.407038	0.370258	0.464821
YGR249W	0.254982	0.298025	0.275963	0.287574	0.263597	0.293401
YGR250C	0.506602	0.537331	0.528996	0.703355	0.683457	0.721522
YGR251W	0.971459	0.987747	0.985411	0.790448	0.738835	0.751544
YGR252W	0.931535	0.945519	0.898509	0.94468	0.967419	0.957556
YGR253C	1.68215	1.7357	1.89188	1.97212	1.82119	1.89343
YGR254W	1.98522	2.30073	2.85677	4.14745	3.67138	4.03905
YGR255C	0.450312	0.469911	0.489413	0.578068	0.575592	0.621654
YGR256W	0.317922	0.367555	0.334489	0.345345	0.342086	0.400013
YGR257C	0.870327	0.961577	0.983065	0.981118	0.914704	0.923214
YGR258C	0.392276	0.409873	0.395811	0.414128	0.415392	0.430995
YGR260W	0.834057	0.9251	0.951728	0.757033	0.712767	0.758481
YGR261C	0.536488	0.559242	0.529265	0.56023	0.578234	0.604195
YGR262C	0.647435	0.735866	0.774648	0.744573	0.633096	0.720608
YGR263C	0.49162	0.464752	0.457492	0.458755	0.452613	0.46401
YGR264C	1.7997	1.76936	1.7298	1.73494	1.71507	1.65543
YGR266W	0.67786	0.725679	0.69787	0.710967	0.690946	0.721488
YGR267C	1.18071	1.22326	1.29282	1.22613	1.18723	1.22885
YGR268C	1.23299	1.41318	1.50725	1.54561	1.28461	1.39899
YGR270W	0.763402	0.761028	0.711687	0.76947	0.785612	0.802378
YGR271W	0.468509	0.479531	0.449716	0.47908	0.485585	0.5106
YGR271C-A	0.77522	0.692799	0.631592	0.580419	0.666656	0.589133
YGR274C	0.521901	0.54166	0.496453	0.538141	0.554358	0.551126
YGR275W	0.540541	0.610113	0.651441	0.691696	0.61753	0.641871
YGR276C	0.509128	0.52337	0.515886	0.479064	0.478808	0.495726
YGR277C	0.581383	0.63054	0.631328	0.685172	0.60184	0.649351
YGR278W	0.729581	0.746013	0.697074	0.669394	0.72957	0.685547
YGR279C	2.8718	3.21862	3.60204	3.59516	3.0802	3.13831
YGR280C	1.13724	1.08376	1.06939	0.935495	0.89861	0.825795
YGR281W	0.597217	0.634923	0.609562	0.648817	0.662116	0.688112
YGR282C	2.79268	3.05362	3.17513	4.95881	4.50347	4.65681
YGR283C	1.36511	1.30486	1.369	2.1565	2.07009	2.01901
YGR284C	0.989571	0.970246	0.960136	0.924895	0.976002	0.966045
YGR285C	2.06797	2.11687	2.14761	2.00236	1.86985	1.72341
YGR286C	0.631667	0.716792	0.756773	0.494976	0.443775	0.492738
YGR287C	0.337375	0.371715	0.373337	0.310593	0.310682	0.332954
YGR288W	0.375152	0.434813	0.435445	0.490401	0.441778	0.495489
YGR289C	0.353643	0.380103	0.371062	0.438348	0.44792	0.508255
YGR292W	0.563077	0.584245	0.563025	0.542005	0.539021	0.571181
YGR294W	0.39542	0.451263	0.467856	0.343612	0.321313	0.342425
YGR295C	1.24777	1.19849	1.15148	1.30675	1.37613	1.44673
YGR296W	0.772484	0.888795	0.884848	0.822887	0.763537	0.822976
YHL048W	0.514737	0.502744	0.469901	0.624069	0.644158	0.567251
YHL047C	0.492902	0.532173	0.529423	0.56494	0.558252	0.538522
YHL046C	0.220101	0.279204	0.265584	0.240202	0.213211	0.277294
YHL043W	0.582461	0.598888	0.592708	0.704369	0.69229	0.727882
YHL040C	0.731065	0.807471	0.829481	0.681427	0.634022	0.640773
YHL039W	0.822714	0.791877	0.738336	0.712517	0.756821	0.693686
YHL038C	0.596124	0.605141	0.570147	0.570025	0.564771	0.567515
YHL036W	0.61132	0.677542	0.709171	0.804254	0.802168	0.881653
YHL035C	0.507937	0.513654	0.495587	0.634909	0.678023	0.700184
YHL034C	1.10308	1.19058	1.13108	1.50977	1.45082	1.58463
YHL033C	12.1153	12.3636	14.0332	15.0271	13.3466	12.54
YHL032C	0.608176	0.71649	0.724856	0.711737	0.610149	0.699581
YHL031C	0.837037	1.01575	1.09516	1.08195	1.0201	1.12646
YHL030W	0.51298	0.518539	0.500285	0.517187	0.521038	0.549667
YHL028W	0.630854	0.743345	0.858611	0.808504	0.712427	0.767697
YHL027W	0.886799	1.02489	1.07965	1.25648	1.12657	1.17145
YHL025W	1.48176	1.7453	1.87574	1.8587	1.69723	1.76406
YHL024W	0.475291	0.520903	0.507799	0.782225	0.779955	0.916784
YHL023C	0.53468	0.529645	0.511591	0.542576	0.540706	0.572551
YHL022C	0.357371	0.36358	0.341068	0.285159	0.297616	0.339642
YHL021C	0.617397	0.650445	0.608174	1.15926	1.17995	1.52648
YHL020C	1.1638	1.35163	1.54176	1.91945	1.67836	1.76835
YHL019C	0.519147	0.554665	0.565842	0.636232	0.626087	0.663095
YHL016C	0.502125	0.536812	0.500524	0.599883	0.587732	0.647355
YHL015W	8.75942	8.41958	9.06379	10.1077	9.5602	9.25969
YHL014C	1.32758	1.21751	1.14866	1.04398	1.17668	1.07451
YHL013C	0.761907	0.704615	0.727989	0.703541	0.711856	0.678116
YHL011C	1.9307	1.93275	2.01821	2.09892	1.98373	1.84014
YHL010C	0.505232	0.490986	0.462509	0.513675	0.566481	0.614054
YHL009C	0.500283	0.511055	0.504715	0.607024	0.616146	0.609011
YHL007C	1.23415	1.3107	1.27945	1.24409	1.18832	1.15794
YHL006C	1.21604	1.3629	1.5764	1.46825	1.25588	1.23736
YHL004W	0.985246	1.06974	1.04927	1.01637	0.990035	1.01809
YHL003C	0.98583	0.974449	0.962218	0.938088	0.997524	1.02142
YHL002W	1.12429	1.17954	1.18215	1.30036	1.28384	1.29875
YHL001W	4.94194	4.77989	4.81524	5.36553	5.51602	5.21599
YHR001W	0.772156	0.745129	0.763584	0.844288	0.890651	0.898779
YHR001W-A	1.35547	1.21866	1.33107	1.5746	1.59995	1.7815
YHR002W	0.758101	0.738941	0.692517	0.746029	0.797396	0.836775
YHR003C	1.03913	1.06426	1.03902	0.973901	0.958308	0.966509
YHR004C	0.614038	0.615489	0.636983	0.618573	0.597112	0.627073
YHR005C	1.49321	1.44553	1.48781	1.74072	1.6845	1.65916
YHR005C-A	4.0072	3.58512	3.82201	3.68201	3.96221	4.05642
YHR006W	1.0818	1.14169	1.11796	1.7785	1.71514	1.69888
[truncated: 3,772 more rows]

## Sheet: Relative occs._ Reps._averaged
Relative Rpb1 occupancies
Gene	WT-averaged	s6e3-averaged	log∆(s6,e3/WT)
YAL068C	0.31761	0.322812	0.0234399
YAL067C	0.295908	0.254249	-0.218908
YAL064W	0.334325	0.324205	-0.0443436
YAL063C	0.4859	0.490367	0.0132018
YAL062W	0.881513	0.840574	-0.0686078
YAL060W	1.5786	1.88163	0.253335
YAL059W	1.24138	1.00702	-0.301854
YAL058W	0.632929	0.59507	-0.0889823
YAL056W	0.815378	0.854516	0.0676371
YAL055W	0.723887	0.722312	-0.00314278
YAL054C	0.553539	0.63145	0.189985
YAL053W	0.993501	1.94693	0.970606
YAL051W	0.63774	0.649979	0.0274247
YAL049C	0.926179	0.959702	0.0512953
YAL048C	0.609723	0.669505	0.134941
YAL047C	0.453144	0.460958	0.0246683
YAL046C	0.819666	0.915985	0.160287
YAL044C	1.07939	1.34884	0.321511
YAL043C	1.09291	1.10164	0.0114805
YAL042W	1.51947	1.35568	-0.164554
YAL041W	1.13598	1.16676	0.0385723
YAL040C	3.03712	3.51161	0.209429
YAL039C	1.66961	1.76204	0.0777321
YAL038W	17.0579	14.3221	-0.252196
YAL036C	1.71668	1.37447	-0.320745
YAL035W	2.02991	2.05686	0.0190295
YAL034W-A	0.840188	0.85763	0.0296421
YAL034C	0.820191	1.12005	0.449531
YAL033W	1.04341	0.97518	-0.0975596
YAL032C	1.08243	1.02218	-0.0826246
YAL031C	0.603767	0.661324	0.131364
YAL030W	1.14137	1.04967	-0.12083
YAL029C	0.896431	0.913008	0.0264361
YAL028W	0.442078	0.496131	0.166419
YAL027W	0.706268	0.700238	-0.0123699
YAL026C	0.561499	0.603462	0.103977
YAL025C	2.06043	1.72766	-0.254128
YAL024C	0.649234	0.681949	0.070925
YAL023C	1.94162	1.78316	-0.122823
YAL022C	0.950139	1.04201	0.133164
YAL021C	1.11109	1.16524	0.0686483
YAL020C	1.00409	0.868452	-0.209371
YAL019W	0.898735	0.864603	-0.0558582
YAL017W	0.498654	0.701281	0.491954
YAL016W	1.15676	1.36702	0.240942
YAL015C	0.752486	0.75222	-0.00051139
YAL014C	1.24974	1.45975	0.224094
YAL013W	1.09799	1.17438	0.097032
YAL012W	4.08541	3.70941	-0.13929
YAL011W	0.90426	0.840399	-0.105665
YAL010C	0.61971	0.658535	0.0876677
YAL009W	0.678921	0.699743	0.0435831
YAL008W	0.698188	0.689835	-0.0173626
YAL007C	1.15889	1.25027	0.109496
YAL005C	6.17512	6.20677	0.00737385
YAL003W	10.1564	8.99726	-0.17483
YAL002W	0.655838	0.623713	-0.0724566
YAL001C	0.573053	0.640072	0.159564
YAR002W	1.27122	1.27478	0.00402784
YAR002C-A	1.35599	1.41932	0.0658568
YAR003W	0.940059	0.984693	0.0669227
YAR007C	0.940248	1.02241	0.120866
YAR008W	0.802638	0.764406	-0.0704108
YAR014C	0.986025	1.10247	0.161038
YAR015W	0.85873	1.03761	0.272994
YAR018C	0.747831	1.0392	0.474683
YAR019C	0.536343	0.657346	0.293499
YAR020C	0.554932	0.635876	0.196434
YAR027W	0.789609	1.12172	0.506502
YAR031W	0.559874	0.570156	0.0262558
YAR033W	0.718748	0.698982	-0.0402291
YAR035W	0.298873	0.287213	-0.0574127
YAR042W	0.897276	0.906081	0.0140883
YAR050W	0.371057	0.319247	-0.216964
YAR071W	1.32241	1.31438	-0.00878495
YBL108C-A	0.181113	0.189221	0.0631821
YBL106C	0.498427	0.457559	-0.123424
YBL105C	0.802236	0.841985	0.0697676
YBL103C	0.733668	0.75327	0.0380386
YBL102W	0.832509	0.925121	0.152175
YBL101C	0.567166	0.678861	0.259347
YBL099W	2.47449	2.8662	0.212007
YBL098W	0.426618	0.391461	-0.124075
YBL097W	0.712083	0.71909	0.0141265
YBL093C	1.14098	1.00159	-0.187983
YBL092W	7.5144	7.58389	0.0132789
YBL091C-A	2.38747	1.88178	-0.343383
YBL091C	0.842577	0.821532	-0.0364912
YBL090W	0.895217	0.86946	-0.0421174
YBL089W	0.815779	0.746365	-0.128298
YBL088C	0.497253	0.479858	-0.0513697
YBL087C	4.30006	4.1241	-0.0602791
YBL085W	0.774369	0.852838	0.139251
YBL084C	0.645372	0.69403	0.104867
YBL082C	0.81337	0.693598	-0.229813
YBL080C	0.553309	0.537149	-0.0427624
YBL079W	0.943473	0.886428	-0.0899785
YBL078C	0.481715	0.743312	0.625789
YBL076C	2.0972	1.9324	-0.11807
YBL075C	0.63066	0.631126	0.00106411
YBL074C	0.804636	0.82054	0.028238
YBL072C	6.33021	6.52845	0.0444872
YBL071W-A	1.46215	1.11159	-0.395472
YBL069W	1.16369	0.965102	-0.269956
YBL068W	0.990549	0.829857	-0.255366
YBL067C	0.660712	0.608101	-0.119709
YBL066C	0.771948	0.885023	0.197211
YBL064C	0.650128	0.979852	0.591841
YBL063W	0.468297	0.490685	0.0673725
YBL061C	0.961013	1.26786	0.399767
YBL060W	0.674048	0.76769	0.187672
YBL059C-A	0.677735	0.69217	0.0304043
YBL058W	1.28376	1.29121	0.00834554
YBL057C	1.06688	0.943382	-0.177483
YBL056W	1.4854	1.4647	-0.0202529
YBL055C	1.02741	0.912054	-0.171815
YBL054W	1.22206	1.00257	-0.28561
YBL052C	0.550179	0.560857	0.0277333
YBL051C	0.94968	1.02352	0.108028
YBL050W	0.813913	0.952151	0.226315
YBL049W	0.789702	0.853134	0.111463
YBL047C	1.00898	1.15004	0.188779
YBL046W	0.726144	0.714182	-0.0239648
YBL045C	1.72775	1.956	0.179008
YBL043W	0.363821	0.635564	0.804808
YBL042C	1.78173	1.63496	-0.124028
YBL041W	2.01985	2.08631	0.0467049
YBL040C	1.19439	1.21509	0.024792
YBL039C	1.88951	1.40225	-0.43027
YBL038W	1.08616	1.2298	0.179178
YBL037W	0.6413	0.711312	0.149484
YBL036C	0.890649	0.863104	-0.045322
YBL035C	0.80303	0.772643	-0.055653
YBL034C	0.478736	0.504547	0.0757577
YBL033C	1.36362	1.31805	-0.0490284
YBL032W	1.04952	0.977845	-0.102048
YBL031W	0.948152	0.958968	0.0163635
YBL030C	4.01742	4.63675	0.206845
YBL028C	1.11593	0.909402	-0.295259
YBL027W	6.503	6.57429	0.0157287
YBL026W	1.08988	1.19023	0.127062
YBL025W	0.94411	0.782302	-0.271229
YBL024W	1.20594	1.12696	-0.0977152
YBL023C	0.66877	0.737262	0.140668
YBL022C	0.872334	0.918637	0.0746138
YBL021C	0.925644	0.811679	-0.189548
YBL020W	0.707072	0.649025	-0.123585
YBL019W	0.573699	0.531121	-0.111253
YBL018C	1.01548	0.837033	-0.278806
YBL017C	0.879967	0.941471	0.0974667
YBL016W	1.24184	1.35849	0.129519
YBL015W	0.493174	0.563638	0.19267
YBL014C	0.754214	0.713497	-0.0800656
YBL013W	0.426658	0.356937	-0.25741
YBL011W	0.998333	0.926308	-0.108029
YBL009W	0.791901	0.736672	-0.104298
YBL008W	0.515376	0.503859	-0.032604
YBL007C	0.991211	1.18176	0.253668
YBL006C	1.33426	1.30125	-0.0361416
YBL005W	1.32175	0.996997	-0.406793
YBL004W	1.00459	0.880378	-0.190416
YBL003C	6.56369	5.27021	-0.316645
YBL002W	6.4343	5.38351	-0.257237
YBL001C	2.96833	2.34141	-0.342277
YBR001C	0.641186	0.769412	0.263014
YBR002C	1.65438	1.57634	-0.0697139
YBR003W	0.709954	0.816854	0.202352
YBR004C	0.651043	0.781671	0.26381
YBR005W	0.820996	1.06552	0.376115
YBR006W	0.666559	0.666055	-0.0010926
YBR008C	0.944145	0.962011	0.027044
YBR009C	7.96404	6.44481	-0.305363
YBR010W	8.60051	7.03886	-0.289082
YBR011C	2.45992	2.01675	-0.286579
YBR014C	0.735944	0.757322	0.0413126
YBR015C	1.19298	1.22798	0.0417203
YBR016W	1.22867	1.39177	0.179823
YBR017C	0.928499	0.927304	-0.0018587
YBR018C	0.232489	0.255881	0.138305
YBR019C	0.457196	0.48552	0.0867155
YBR020W	0.7793	0.722147	-0.109887
YBR021W	0.974509	1.0378	0.0907877
YBR022W	0.870214	0.999633	0.200029
YBR023C	0.963486	1.56439	0.699269
YBR024W	0.834106	0.610753	-0.449642
YBR025C	3.15667	2.96634	-0.0897201
YBR026C	0.499472	0.593019	0.247673
YBR029C	1.47161	1.38202	-0.0906118
YBR030W	0.913167	0.798956	-0.192763
YBR031W	7.34278	6.57143	-0.16012
YBR034C	2.08982	2.02493	-0.0455113
YBR035C	1.46402	1.56022	0.0918133
YBR036C	1.3459	1.4176	0.0748886
YBR037C	0.727522	0.728493	0.00192455
YBR038W	0.899747	1.08111	0.264921
YBR039W	1.49464	1.62609	0.121607
YBR040W	0.187387	0.194238	0.0518037
YBR041W	0.661289	0.745523	0.172971
YBR042C	0.713131	0.700704	-0.0253634
YBR043C	0.855806	0.959691	0.165287
YBR044C	0.779235	0.894844	0.199576
YBR045C	0.301141	0.279293	-0.108661
YBR046C	0.393459	0.422377	0.102319
YBR048W	4.63837	4.80177	0.0499457
YBR049C	0.981781	0.919266	-0.0949181
YBR050C	0.696396	0.657946	-0.0819397
YBR052C	0.757589	1.10688	0.547015
YBR054W	0.724556	0.930442	0.360819
YBR055C	0.566393	0.55774	-0.0222107
YBR057C	0.88771	0.900861	0.0212158
YBR058C	0.634727	0.649664	0.0335562
YBR058C-A	0.855569	0.913804	0.0950004
YBR059C	0.656557	0.824589	0.328754
YBR060C	0.721925	0.6688	-0.110274
YBR061C	0.962335	0.865103	-0.153669
YBR065C	0.548471	0.607418	0.147275
YBR066C	0.982997	0.967312	-0.0232055
YBR067C	1.77516	1.65493	-0.101179
YBR068C	5.60289	6.88182	0.296619
YBR069C	3.4018	2.57643	-0.400927
YBR070C	0.879254	0.91536	0.0580595
YBR072W	0.554068	0.812143	0.551672
YBR073W	0.803411	0.95122	0.24364
YBR076W	0.4099	0.659277	0.685611
YBR077C	1.62426	2.01085	0.30802
YBR078W	5.69452	6.01375	0.07869
YBR079C	2.19203	2.18892	-0.0020521
YBR080C	0.720182	0.734495	0.0283902
YBR081C	0.577686	0.599322	0.0530454
YBR082C	2.56845	2.56494	-0.00197038
YBR083W	1.55193	1.86194	0.262746
YBR084W	1.2946	0.962918	-0.427021
YBR084C-A	6.13547	6.14363	0.00191611
YBR085W	0.36988	0.318883	-0.214031
YBR086C	1.1888	1.2986	0.127449
YBR087W	1.06547	1.02475	-0.0562128
YBR088C	1.68021	1.65049	-0.0257506
YBR089C-A	1.78784	1.72365	-0.0527465
YBR091C	1.29055	1.53264	0.248037
YBR092C	1.9747	2.62318	0.409688
YBR093C	1.87308	2.5236	0.430073
YBR094W	0.601281	0.57867	-0.0552971
YBR095C	0.717423	0.725851	0.0168487
YBR097W	0.424714	0.421485	-0.011009
YBR098W	0.642438	0.576145	-0.157126
YBR101C	2.3112	2.301	-0.00638171
YBR102C	0.603383	0.656305	0.121293
YBR103W	0.729965	0.728129	-0.00363469
YBR104W	0.897599	0.805894	-0.155482
YBR105C	0.707317	1.1271	0.672187
YBR106W	3.77149	2.91741	-0.370446
YBR107C	1.00779	0.812196	-0.311301
YBR108W	0.511195	0.52244	0.0313908
YBR109C	1.54457	1.79357	0.215633
YBR110W	0.55836	0.619667	0.150299
YBR111C	0.658273	0.813258	0.305027
YBR111W-A	0.709579	0.739045	0.0586987
YBR112C	1.51383	1.49171	-0.0212413
YBR114W	0.541043	0.556586	0.0408614
YBR115C	0.879516	0.7912	-0.152668
YBR117C	0.724215	0.60493	-0.25965
YBR118W	16.9248	18.0512	0.0929512
YBR119W	1.02124	0.969818	-0.0745294
YBR120C	0.814385	0.833613	0.0336672
YBR121C	1.60416	1.51008	-0.0872002
YBR122C	1.44999	1.19897	-0.27425
YBR123C	0.639119	0.629636	-0.0215657
YBR125C	0.857328	0.702057	-0.288258
YBR126C	1.01351	1.62932	0.6849
YBR127C	1.55523	1.65419	0.0889997
YBR128C	0.719554	0.705605	-0.0282425
YBR129C	0.667932	0.70392	0.0757103
YBR130C	0.916822	0.961138	0.0681016
YBR131W	0.44629	0.425087	-0.0702212
YBR132C	0.441481	0.734243	0.733906
YBR133C	1.0156	0.976475	-0.0566717
YBR135W	1.12111	1.15332	0.0408666
YBR136W	0.368632	0.377998	0.0361957
YBR137W	0.658222	0.776008	0.237498
YBR139W	0.606381	1.04928	0.791107
YBR140C	0.57159	0.609256	0.0920689
YBR142W	0.841717	0.700737	-0.264463
YBR143C	1.99479	2.00799	0.00951444
YBR145W	0.560981	0.506328	-0.147879
YBR146W	0.912783	1.00814	0.143354
YBR147W	0.235648	0.306584	0.379647
YBR148W	0.257537	0.261025	0.0194082
YBR149W	0.83442	1.17604	0.495089
YBR150C	0.581382	0.690098	0.247314
YBR151W	0.967953	1.09751	0.181221
YBR152W	0.77417	0.697195	-0.151089
YBR153W	1.41999	1.27873	-0.151172
YBR154C	2.01992	1.87819	-0.104956
YBR155W	0.802199	0.650281	-0.302896
YBR156C	0.517996	0.587161	0.180815
YBR157C	1.15211	1.1899	0.0465631
YBR158W	3.40402	4.53313	0.413266
YBR159W	0.892608	0.962523	0.108795
YBR160W	1.06286	1.40326	0.400834
YBR161W	0.760054	0.828423	0.124266
YBR162C	3.05868	3.2253	0.0765244
YBR162W-A	2.06628	2.15426	0.0601548
YBR163W	0.739243	0.692049	-0.0951731
YBR164C	0.896201	0.921959	0.0408814
YBR165W	0.847224	0.852932	0.00968827
YBR166C	0.78766	0.826064	0.0686798
YBR167C	1.06413	1.15126	0.113534
YBR168W	0.389634	0.45127	0.211871
YBR169C	0.405025	0.596174	0.557721
YBR170C	0.803455	0.835115	0.0557571
YBR171W	0.991158	0.937884	-0.0797057
YBR172C	1.70779	1.61779	-0.0781042
YBR173C	1.81028	1.5834	-0.193184
YBR175W	0.913312	0.769722	-0.246771
YBR176W	0.736083	0.627395	-0.230493
YBR177C	0.845594	0.872642	0.0454251
YBR179C	0.564849	0.561367	-0.00892048
YBR180W	0.403116	0.305146	-0.401696
YBR181C	5.51066	5.78845	0.0709505
YBR182C	0.480535	0.427428	-0.168962
YBR183W	0.585636	0.870595	0.571998
YBR185C	0.621326	0.679409	0.128928
YBR186W	0.551382	0.40963	-0.428732
YBR188C	0.919859	0.784053	-0.230461
YBR189W	6.68857	6.73989	0.0110262
YBR191W	6.44197	6.54868	0.0237025
YBR192W	0.918082	0.811807	-0.177487
YBR193C	0.924045	0.841934	-0.134255
YBR194W	0.810907	0.803299	-0.0136007
YBR195C	0.959709	0.83581	-0.199421
YBR196C	4.53096	4.63959	0.0341814
YBR198C	1.21708	1.08547	-0.165105
YBR199W	0.824155	1.0101	0.293515
YBR200W	0.535745	0.601744	0.167604
YBR201W	0.570312	0.642264	0.171415
YBR202W	1.02443	1.13021	0.141766
YBR203W	0.454289	0.669057	0.558519
YBR204C	0.402918	0.463052	0.200686
YBR205W	0.86016	0.818119	-0.0722951
YBR207W	0.961256	0.971151	0.0147744
YBR208C	0.589658	0.569006	-0.051433
YBR210W	0.691267	0.698671	0.0153698
YBR211C	0.724289	0.813804	0.168117
YBR212W	0.619368	0.842136	0.443255
YBR213W	0.586131	0.57572	-0.0258572
YBR214W	0.580189	0.763481	0.396071
YBR215W	0.600276	0.580766	-0.0476696
YBR216C	0.569366	0.604926	0.0874042
YBR217W	0.555626	0.600005	0.110861
YBR218C	0.955015	0.965773	0.0161603
YBR221C	1.12133	1.15894	0.047596
YBR222C	0.67002	0.740037	0.143392
YBR223C	0.502641	0.546422	0.120488
YBR227C	0.574439	0.597154	0.0559497
YBR228W	0.697713	0.681847	-0.0331873
YBR229C	0.534223	0.554922	0.054843
YBR230C	0.793515	1.07519	0.438269
YBR231C	0.896755	0.795544	-0.172773
YBR233W	0.674833	0.650543	-0.0528864
YBR233W-A	0.805631	0.797888	-0.0139337
YBR234C	0.926924	1.04984	0.179645
YBR236C	0.739097	0.802758	0.1192
YBR237W	0.49033	0.537566	0.132688
YBR238C	0.847687	0.556809	-0.606348
YBR240C	0.39227	0.39923	0.025373
YBR243C	0.817575	0.765224	-0.0954692
YBR244W	0.737945	0.685968	-0.105372
YBR245C	0.70016	0.665366	-0.0735373
YBR247C	1.23654	0.977476	-0.339173
YBR248C	1.31153	1.02739	-0.352271
YBR249C	2.37244	1.9126	-0.310833
YBR250W	0.283271	0.251275	-0.172915
YBR251W	0.893979	0.879998	-0.0227414
YBR252W	1.27487	0.969264	-0.395386
YBR253W	1.27538	1.07978	-0.240193
YBR254C	0.866936	0.829061	-0.0644466
YBR255W	0.487616	0.532119	0.126004
YBR256C	0.947553	1.12359	0.245842
YBR257W	0.797726	0.807289	0.0171922
YBR258C	0.876342	0.893253	0.0275742
YBR260C	0.652869	0.622997	-0.0675698
YBR261C	1.0838	0.922248	-0.232871
YBR262C	1.26968	1.27907	0.0106374
YBR263W	1.1833	1.00255	-0.239143
YBR264C	0.871172	0.822755	-0.0824961
YBR265W	1.34568	1.10952	-0.278393
YBR267W	1.54091	1.1901	-0.372702
YBR268W	1.09674	0.979525	-0.163071
YBR272C	0.501697	0.571364	0.187596
YBR273C	0.647781	0.676028	0.0615777
YBR274W	0.463476	0.474289	0.0332719
YBR275C	0.483506	0.472886	-0.0320411
YBR276C	0.55783	0.59092	0.0831375
YBR278W	0.768855	0.74239	-0.0505347
YBR279W	0.954986	1.00161	0.0687741
YBR280C	0.449132	0.473744	0.0769697
YBR281C	0.526907	0.528266	0.00371664
YBR282W	1.12068	1.15874	0.0481841
YBR283C	1.49285	1.46971	-0.02254
YBR286W	1.48621	1.76319	0.246548
YBR288C	0.72502	0.951195	0.39172
YBR289W	0.696999	0.717386	0.0415931
YBR290W	1.10882	1.22413	0.142729
YBR291C	1.00399	1.08851	0.116621
YBR293W	0.681001	0.652201	-0.0623409
YBR294W	0.493194	0.485048	-0.0240301
YBR295W	0.555823	0.771869	0.47373
YBR296C	0.347289	0.824581	1.24753
YBR297W	0.449579	0.76066	0.758676
YBR298C	0.534158	0.702619	0.395477
YBR299W	0.623282	0.603923	-0.0455217
YBR301W	0.439003	0.324537	-0.435844
YBR302C	0.423741	0.466082	0.137403
YCL069W	0.27042	0.27257	0.0114239
YCL064C	0.858325	0.694563	-0.305419
YCL063W	1.27119	1.19098	-0.0940341
YCL061C	0.630801	0.618049	-0.0294644
YCL059C	1.20679	1.02697	-0.232787
YCL058C	2.05387	1.88507	-0.123723
YCL058W-A	2.19816	1.99315	-0.141245
YCL057W	0.868523	0.879879	0.0187415
YCL055W	1.73045	1.71536	-0.0126344
YCL054W	1.41128	1.25264	-0.172026
YCL052C	0.711749	0.845929	0.249168
YCL051W	0.772577	0.882068	0.191212
YCL050C	1.52232	1.34421	-0.17952
YCL048W	0.314462	0.300264	-0.0666518
YCL045C	0.957705	1.00155	0.0645795
YCL044C	1.21744	1.13187	-0.105147
YCL043C	3.36578	3.42086	0.0234186
YCL040W	0.771868	2.59769	1.7508
YCL039W	0.729862	0.755506	0.0498203
YCL038C	0.499734	0.709902	0.506461
YCL037C	3.88458	3.84175	-0.0159933
YCL036W	1.5089	1.04522	-0.52969
YCL035C	1.43808	1.79151	0.317036
YCL034W	0.98478	1.08814	0.143993
YCL033C	0.77152	0.805822	0.0627582
YCL032W	0.825632	0.833157	0.0130897
YCL031C	1.83665	1.77	-0.0533267
YCL030C	0.921553	1.1016	0.257467
YCL029C	0.857224	0.858419	0.00200983
YCL028W	0.840273	0.863875	0.0399646
YCL027W	0.426735	0.439688	0.0431396
YCL026C-A	0.457068	0.408455	-0.162233
YCL025C	1.7939	2.24548	0.323921
YCL024W	0.563029	0.602049	0.0966701
YCL018W	2.49299	2.17978	-0.1937
YCL017C	0.928871	0.968337	0.0600299
YCL016C	0.725852	0.716058	-0.0195985
YCL014W	0.6161	0.727017	0.238825
YCL012C	0.716083	0.752879	0.0722919
YCL011C	2.17607	2.05986	-0.0791818
YCL010C	2.13613	1.70025	-0.329254
YCL009C	2.06614	1.68231	-0.296496
YCL008C	1.12454	0.949998	-0.243343
YCL005W-A	3.87827	3.26595	-0.24791
YCL005W	1.03947	0.911024	-0.190282
YCL004W	0.797682	0.736731	-0.114677
YCL001W	1.12129	1.0934	-0.0363385
YCR002C	0.996339	1.22058	0.292864
YCR003W	0.877869	0.967418	0.140135
YCR004C	0.811694	1.1442	0.495331
YCR005C	2.72389	3.08222	0.178299
YCR008W	1.08323	1.08114	-0.00278443
YCR009C	1.04399	1.26188	0.273464
YCR010C	0.375658	0.597368	0.669201
YCR011C	0.822946	0.977599	0.248445
YCR012W	13.8257	11.8825	-0.218514
YCR014C	0.941921	0.815142	-0.208555
YCR017C	0.786578	0.821622	0.0628855
YCR018C	1.16785	1.04953	-0.154107
YCR019W	0.557876	0.588305	0.0766196
YCR020C	0.706613	0.681536	-0.0521301
YCR020C-A	0.749969	0.739888	-0.0195242
YCR020W-B	0.803107	0.761701	-0.0763686
YCR021C	0.606206	0.620763	0.0342344
YCR023C	0.923878	0.880555	-0.0692891
YCR024C	0.851715	0.859334	0.0128498
YCR024C-A	7.06893	8.40649	0.250012
YCR026C	0.941925	1.02274	0.118749
YCR027C	0.787386	0.791946	0.00833102
YCR028C	0.812487	0.736141	-0.142364
YCR028C-A	1.16293	1.08721	-0.0971328
YCR030C	0.842628	0.911726	0.113705
YCR031C	6.91301	7.05317	0.0289583
YCR032W	0.442694	0.451179	0.0273898
YCR033W	1.07381	1.07417	0.000480282
YCR034W	1.85653	1.63343	-0.184707
YCR035C	1.56561	1.40651	-0.154608
YCR036W	1.06288	1.68367	0.663637
YCR037C	1.22425	1.28235	0.0668948
YCR038C	0.689101	0.724459	0.0721879
YCR039C	0.388961	0.441429	0.182556
YCR040W	0.172395	0.192457	0.158816
YCR042C	0.902356	0.905707	0.00534849
YCR044C	1.38441	1.24571	-0.152311
YCR045C	0.933282	0.846779	-0.140327
YCR046C	1.86396	1.47028	-0.342274
YCR047C	1.26093	0.986229	-0.354494
YCR048W	0.787139	0.668616	-0.235441
YCR052W	1.1011	1.08172	-0.0256231
YCR053W	2.16913	2.08524	-0.0569018
YCR054C	0.83718	0.73009	-0.197463
YCR057C	1.56752	1.26364	-0.310902
YCR059C	1.32623	1.00841	-0.395241
YCR060W	0.86745	0.817311	-0.0858959
YCR063W	1.8746	2.26848	0.275137
YCR065W	1.87929	2.03374	0.113946
YCR066W	0.652323	0.649183	-0.00696228
YCR067C	0.887531	0.905599	0.0290753
YCR068W	0.762726	0.683574	-0.158068
YCR069W	1.03572	1.06286	0.0373189
YCR071C	1.27505	1.27421	-0.000949168
YCR072C	1.47276	1.18853	-0.309351
YCR073C	0.66755	0.750482	0.168942
YCR073W-A	0.753826	0.77255	0.0353956
YCR075C	0.637396	0.603128	-0.0797257
YCR077C	1.13418	1.17391	0.0496699
YCR079W	1.19615	1.11825	-0.0971547
YCR081W	0.49643	0.50832	0.0341456
YCR082W	1.30103	1.35307	0.0565807
YCR083W	0.96675	0.904111	-0.096644
YCR084C	1.66626	1.63928	-0.0235484
YCR086W	1.35813	1.10456	-0.298149
YCR088W	1.11034	1.14501	0.0443568
YCR089W	0.590285	0.616123	0.0618064
YCR091W	0.373083	0.485383	0.379626
YCR092C	0.61206	0.616058	0.0093941
YCR093W	1.3891	1.40547	0.0169043
YCR094W	0.55958	0.61669	0.140203
YCR098C	0.613867	1.23168	1.00463
YCR104W	0.244881	0.205022	-0.256302
YCR105W	0.498174	0.493336	-0.0140779
YCR106W	0.707374	0.746242	0.0771711
YCR107W	0.83138	0.994441	0.258379
YDL248W	0.383658	0.465958	0.28038
YDL247W	0.433808	0.552163	0.348036
YDL245C	0.354173	0.496805	0.488224
YDL244W	0.373126	0.392845	0.0742998
YDL243C	0.381441	0.343909	-0.149434
YDL240W	0.636385	0.710607	0.159152
YDL239C	0.303236	0.301995	-0.00591798
YDL238C	0.481253	0.631866	0.392821
YDL237W	0.595641	0.644324	0.113343
YDL236W	1.18063	1.19784	0.0208775
YDL235C	1.20875	1.5306	0.340586
YDL234C	0.601001	0.728327	0.27722
YDL232W	1.62739	1.4457	-0.170791
YDL231C	0.903098	0.911597	0.0135124
YDL230W	0.577929	0.605985	0.0683895
YDL229W	7.40022	6.49504	-0.188228
YDL227C	1.29443	0.617499	-1.06781
YDL226C	1.13128	1.04081	-0.120249
YDL225W	0.768932	0.761294	-0.0144016
YDL224C	1.15791	1.27412	0.137974
YDL223C	0.464648	0.528063	0.184572
YDL222C	0.430909	0.762796	0.823914
YDL220C	0.524616	0.581077	0.147467
YDL219W	0.627315	0.527693	-0.249492
YDL217C	1.07445	1.01835	-0.077364
YDL216C	0.54012	0.54825	0.0215559
YDL215C	0.842071	0.970922	0.205414
YDL214C	0.373758	0.428602	0.197533
YDL213C	1.02677	1.0497	0.0318714
YDL212W	1.27952	1.3262	0.0516911
YDL210W	0.363088	0.330972	-0.133611
YDL209C	0.736395	0.712902	-0.0467761
YDL208W	2.8615	2.47431	-0.209749
YDL207W	0.768102	0.850782	0.147491
YDL205C	1.24586	1.19134	-0.0645599
YDL204W	0.74887	1.12235	0.583733
YDL203C	0.650708	0.657915	0.015891
YDL202W	1.13967	0.994872	-0.196034
YDL201W	1.16473	0.925286	-0.332018
YDL200C	0.686466	0.674313	-0.0257699
YDL198C	1.55909	1.34369	-0.214506
YDL197C	0.762166	0.77598	0.0259156
YDL195W	1.25705	1.30964	0.0591254
YDL194W	0.32852	0.368263	0.164755
YDL193W	1.0085	0.908747	-0.150263
YDL192W	3.383	3.36011	-0.00979489
YDL191W	4.9604	4.97856	0.00527358
YDL190C	0.837082	0.825295	-0.0204599
YDL189W	0.904504	0.808291	-0.162252
YDL188C	0.838229	0.825883	-0.0214067
YDL185W	1.64705	1.75415	0.0908864
YDL184C	9.5039	8.0782	-0.234485
YDL183C	0.454161	0.414051	-0.133395
YDL182W	2.80567	2.29458	-0.290118
YDL181W	1.64614	1.75696	0.0939949
YDL179W	1.58791	1.75295	0.142655
YDL178W	0.808722	0.815249	0.0115972
YDL176W	0.601136	0.613015	0.0282307
YDL175C	1.08758	1.04335	-0.0598992
YDL174C	1.06723	1.01647	-0.0702919
YDL173W	1.10394	1.0873	-0.0219057
YDL171C	1.19276	1.0052	-0.246822
YDL170W	0.515784	0.491523	-0.0695079
YDL169C	0.315698	0.369236	0.225997
YDL168W	0.882853	0.834943	-0.0804952
YDL167C	1.3595	1.12911	-0.267892
YDL166C	1.57215	1.20356	-0.385422
YDL165W	1.07031	1.00317	-0.0934653
YDL164C	0.680327	0.65119	-0.0631487
YDL161W	1.45292	1.36458	-0.0904959
YDL160C	1.30789	1.54442	0.239819
YDL159W	0.711458	0.728202	0.0335612
YDL155W	1.22472	1.25097	0.0305923
YDL154W	0.451765	0.408832	-0.144064
YDL153C	0.962067	0.803899	-0.259123
YDL150W	1.08576	0.96299	-0.173114
YDL149W	0.423215	0.407099	-0.0560102
YDL148C	0.871302	0.810061	-0.105142
YDL147W	1.42183	1.58553	0.15721
YDL146W	0.554937	0.614406	0.146868
YDL145C	1.1324	1.14846	0.0203122
YDL143W	1.77542	1.57054	-0.176897
YDL142C	0.727771	0.720551	-0.0143854
YDL141W	0.694835	0.657038	-0.080695
YDL140C	1.84581	1.85257	0.00527499
YDL139C	0.535914	0.506391	-0.0817494
YDL138W	1.10446	1.10686	0.00313114
YDL137W	3.09254	2.70815	-0.191488
YDL136W	4.08073	4.08201	0.000453585
YDL135C	1.11545	1.00457	-0.15104
YDL134C	1.38128	1.41675	0.0365807
YDL133C-A	7.52377	7.64683	0.0234068
YDL132W	0.771594	0.771525	-0.000128303
YDL131W	1.92058	1.65185	-0.217461
YDL130W-A	0.402335	0.984815	1.29146
YDL130W	7.07443	7.18454	0.0222821
YDL128W	1.72249	1.54452	-0.157342
YDL127W	1.20207	1.1221	-0.09933
YDL126C	1.85127	2.02076	0.126387
YDL125C	2.54735	3.92678	0.624351
YDL124W	1.28408	2.02197	0.655021
YDL123W	1.24092	1.34188	0.112846
YDL122W	1.18379	1.12551	-0.0728334
YDL120W	1.17331	1.25656	0.0988983
YDL117W	1.03773	1.25303	0.271981
YDL116W	0.96881	0.959069	-0.0145795
YDL115C	0.640922	0.663773	0.0505406
YDL113C	0.480222	0.604122	0.331139
YDL112W	0.706818	0.625802	-0.175633
YDL111C	1.43316	1.2587	-0.187267
YDL110C	1.17492	1.81748	0.629377
YDL108W	0.70673	0.688036	-0.0386746
YDL107W	0.591772	0.607457	0.0377409
YDL106C	0.729275	0.805158	0.142809
YDL105W	0.801576	0.707723	-0.179654
YDL104C	0.843586	0.726282	-0.216005
YDL103C	0.583275	0.586018	0.00676817
YDL102W	0.557599	0.536783	-0.0548901
YDL101C	0.670217	0.719732	0.102832
YDL100C	1.3251	1.33034	0.00569586
YDL099W	0.736128	0.740036	0.00763785
YDL098C	0.611314	0.511695	-0.25663
YDL097C	1.60866	1.62236	0.0122336
YDL095W	1.68088	1.46936	-0.194025
YDL093W	0.522361	0.463687	-0.171895
YDL092W	1.02266	1.10513	0.111894
YDL091C	0.565785	0.569908	0.0104741
YDL090C	0.560155	0.53013	-0.0794789
YDL089W	0.511032	0.51368	0.00745516
YDL088C	1.05834	1.05201	-0.00865847
YDL087C	0.780009	0.715965	-0.1236
YDL085W	0.620585	0.723072	0.220511
YDL084W	1.84534	1.74357	-0.081847
YDL083C	5.57043	5.48163	-0.0231824
YDL082W	4.44025	3.9057	-0.185062
YDL081C	6.06954	5.89105	-0.0430647
YDL080C	0.990639	0.876687	-0.176299
YDL079C	0.60959	0.656522	0.107005
YDL078C	0.735202	0.826128	0.168224
YDL077C	0.429055	0.449391	0.0668087
YDL076C	0.79151	0.913846	0.207343
YDL075W	5.84495	5.83142	-0.00334347
YDL074C	1.18694	1.11424	-0.0911899
YDL072C	1.2784	2.00759	0.651125
YDL070W	2.55868	2.20553	-0.214272
YDL069C	1.23113	0.988156	-0.317177
YDL067C	2.0176	2.11951	0.0710914
YDL066W	1.22765	1.21083	-0.0199047
YDL065C	0.908265	0.859798	-0.079114
YDL064W	0.990578	0.87341	-0.181611
YDL063C	1.10817	0.891584	-0.313735
YDL061C	5.21819	5.51419	0.0795981
YDL060W	1.1333	0.974652	-0.217568
YDL059C	0.618874	0.526285	-0.233802
YDL058W	0.53766	0.530746	-0.0186712
YDL056W	1.00472	1.07968	0.103801
YDL055C	8.17533	9.7514	0.254333
YDL054C	0.459623	0.479243	0.0603059
YDL053C	0.960869	0.954157	-0.0101132
YDL052C	1.54298	1.42724	-0.112483
YDL051W	1.79882	1.65476	-0.120422
YDL049C	0.932789	0.836769	-0.156722
YDL048C	0.696141	0.716311	0.0412081
YDL047W	1.52008	1.51585	-0.00402009
YDL046W	1.80916	1.83391	0.0196008
YDL045W-A	1.12809	1.16342	0.0444833
YDL045C	0.721886	0.777778	0.107588
YDL044C	0.803474	0.776214	-0.0497972
YDL043C	0.818272	0.812478	-0.0102515
YDL042C	0.760269	0.594145	-0.355695
YDL040C	0.800297	0.761531	-0.0716325
YDL039C	0.374817	0.385797	0.0416555
YDL037C	0.270021	0.242563	-0.154714
YDL036C	1.04751	0.816153	-0.360052
YDL035C	0.691691	0.767909	0.150809
YDL033C	1.57644	1.5791	0.00244018
YDL031W	0.847309	0.769976	-0.138075
YDL030W	0.643307	0.55834	-0.204364
YDL029W	1.05402	1.16692	0.146798
YDL028C	0.715346	0.784524	0.133176
YDL025C	0.56796	0.692257	0.285518
YDL024C	0.27571	0.266384	-0.0496476
YDL022W	1.26996	2.0509	0.69148
YDL021W	0.529039	0.699644	0.403246
YDL020C	2.14801	2.40769	0.16465
YDL019C	0.556429	0.563698	0.0187237
YDL018C	0.716237	0.774616	0.113043
YDL017W	0.603134	0.604714	0.00377391
YDL015C	1.11241	1.16012	0.0605889
YDL014W	4.49757	3.89791	-0.206444
YDL013W	0.870258	0.880636	0.0171016
YDL012C	1.64853	1.50408	-0.132298
YDL010W	0.89725	0.928654	0.0496311
YDL008W	1.9085	1.20144	-0.667672
YDL007W	1.31996	1.41004	0.0952426
YDL006W	1.03362	0.985307	-0.069066
YDL005C	0.854975	0.853235	-0.0029387
YDL004W	1.47497	1.69094	0.197139
YDL003W	1.34265	1.34202	-0.000683949
YDL002C	0.903943	0.892527	-0.0183374
YDL001W	0.725571	0.681972	-0.0894035
YDR001C	0.742184	1.44907	0.965275
YDR002W	1.99344	2.17888	0.128324
YDR003W	1.04009	1.11331	0.098147
YDR004W	0.994328	0.945204	-0.0730961
YDR005C	0.847707	0.89796	0.0830848
YDR006C	1.15065	1.22537	0.0907594
YDR007W	1.2937	1.43462	0.149163
YDR009W	0.432996	0.422969	-0.0338047
YDR011W	2.09073	2.28196	0.126267
YDR012W	7.54323	6.76323	-0.157469
YDR013W	1.30342	1.18508	-0.137317
YDR014W	0.430258	0.423302	-0.0235142
YDR014W-A	0.455251	0.494566	0.119499
YDR016C	0.860039	0.899355	0.0644886
YDR017C	1.10537	1.15217	0.0598204
YDR019C	0.580645	0.765791	0.399295
YDR021W	0.72725	0.590443	-0.300652
YDR022C	0.735758	0.61001	-0.270397
YDR023W	2.07783	2.09617	0.0126753
YDR025W	6.57406	6.65227	0.0170621
YDR026C	1.0447	0.985581	-0.0840465
YDR027C	0.684593	0.710375	0.053336
YDR028C	0.915659	1.09716	0.26089
YDR030C	0.651512	0.623701	-0.0629352
YDR031W	0.452705	0.608161	0.42588
YDR032C	0.783292	1.16446	0.572033
YDR033W	6.02051	6.87596	0.191675
YDR034C	0.99626	0.988527	-0.0112428
YDR035W	1.14055	1.24461	0.125966
YDR036C	0.771779	0.70461	-0.131363
YDR037W	2.86195	2.45289	-0.222517
YDR038C	0.935985	1.15071	0.297961
YDR039C	0.90669	1.22935	0.439219
YDR040C	0.900764	1.37038	0.605356
YDR041W	0.93359	1.25883	0.431223
YDR043C	1.31736	1.26741	-0.0557652
YDR044W	0.742324	0.63785	-0.218832
YDR045C	1.3091	1.20514	-0.119373
YDR046C	2.15049	2.16364	0.00879332
YDR047W	1.67677	1.36419	-0.297638
YDR050C	11.283	9.54277	-0.241676
YDR051C	0.984287	0.898255	-0.131954
YDR052C	1.04072	0.973351	-0.0965464
YDR054C	1.39427	1.55654	0.158833
YDR055W	1.63962	3.37662	1.04222
YDR057W	0.545025	0.568106	0.0598395
YDR058C	0.383974	0.402575	0.0682462
YDR059C	0.481981	0.655397	0.443392
YDR060W	1.41972	1.19514	-0.248421
YDR062W	1.20117	1.08977	-0.140416
YDR063W	1.29823	1.28519	-0.0145712
YDR064W	9.49377	9.62666	0.0200536
YDR065W	0.968302	0.835093	-0.213519
YDR068W	0.668759	0.708431	0.0831425
YDR069C	0.499907	0.523377	0.0661905
YDR071C	1.14595	1.28477	0.164962
YDR072C	1.55945	1.69504	0.120283
YDR073W	1.96114	2.22338	0.181064
YDR074W	0.777483	1.5613	1.00587
YDR075W	0.788291	0.776672	-0.0214213
YDR076W	0.751268	1.12839	0.58687
YDR077W	5.88814	18.6942	1.66671
YDR078C	1.45111	3.47377	1.25934
YDR079W	0.620099	0.641791	0.0496056
YDR079C-A	1.0002	0.960977	-0.057713
YDR080W	0.404469	0.417182	0.044647
YDR081C	0.679235	0.663609	-0.0335779
YDR082W	0.698891	0.676618	-0.0467254
YDR083W	0.884843	0.791616	-0.160621
YDR084C	0.671181	0.705052	0.0710275
YDR085C	0.440924	0.814712	0.885759
YDR086C	1.81551	2.22524	0.293593
YDR087C	1.42638	1.19406	-0.256482
YDR088C	0.594558	0.591181	-0.00821705
YDR091C	1.62853	1.46231	-0.155322
YDR092W	1.38488	1.07209	-0.369333
YDR093W	0.848345	0.723775	-0.22911
YDR096W	0.608854	0.694092	0.189029
YDR097C	0.564549	0.539817	-0.0646304
YDR098C	1.01417	0.941254	-0.107639
YDR099W	1.4107	1.74221	0.304505
YDR100W	0.734475	0.858229	0.22465
YDR101C	1.59377	1.29602	-0.298356
YDR103W	0.770108	0.750599	-0.0370183
YDR104C	0.409415	0.434237	0.0849164
YDR105C	0.591033	0.644955	0.125961
YDR106W	0.515872	0.651094	0.335852
YDR107C	1.17593	1.49348	0.344879
YDR108W	0.526149	0.546884	0.055765
YDR110W	0.81131	0.670859	-0.274243
YDR113C	0.812575	0.82458	0.021158
YDR116C	0.873804	0.90157	0.0451289
YDR117C	0.58966	0.680354	0.206402
YDR118W	0.654605	0.634855	-0.0441981
YDR120C	1.03329	0.859606	-0.265491
YDR121W	0.837131	0.740179	-0.177579
YDR122W	0.67817	0.848775	0.323735
YDR123C	0.91924	0.801071	-0.198511
YDR125C	0.364406	0.383654	0.0742608
YDR126W	1.38772	1.17624	-0.238535
YDR127W	1.31973	1.21418	-0.120261
YDR128W	0.586165	0.552269	-0.0859364
YDR129C	1.07388	1.23179	0.19792
YDR130C	0.839466	0.92582	0.14126
YDR135C	0.865384	1.00016	0.208821
YDR137W	0.557727	0.598173	0.101003
YDR138W	0.712936	0.694485	-0.0378282
YDR139C	0.970305	0.958539	-0.0176011
YDR140W	1.01312	0.923348	-0.133857
YDR141C	0.609216	0.648185	0.0894513
YDR142C	0.647737	0.626663	-0.0477192
YDR143C	1.30008	1.1462	-0.181736
YDR144C	1.27089	0.990168	-0.360095
YDR145W	1.02974	1.0741	0.0608477
YDR146C	0.854586	1.16073	0.44173
YDR147W	0.712104	0.734617	0.0449052
YDR148C	0.873086	0.996788	0.191163
YDR150W	0.597331	0.653055	0.128674
YDR151C	1.47825	1.41788	-0.0601547
YDR152W	1.59205	1.54645	-0.0419286
YDR153C	1.50009	1.48197	-0.0175275
YDR155C	5.7419	4.21337	-0.446552
YDR156W	3.04458	2.52054	-0.272512
YDR158W	1.98306	1.59299	-0.315988
YDR159W	0.564056	0.573662	0.0243612
YDR160W	0.51187	0.532981	0.0583085
YDR162C	0.884167	0.910892	0.042961
YDR163W	0.86747	0.88802	0.0337782
YDR164C	0.537932	0.550153	0.0324088
YDR165W	1.25442	1.05837	-0.245172
YDR166C	0.600812	0.592825	-0.0193072
YDR167W	1.11174	1.08443	-0.0358874
YDR168W	0.733348	0.766741	0.0642417
YDR169C	0.702681	0.768639	0.129435
YDR170C	0.714304	0.733673	0.0385994
YDR171W	0.600705	1.03952	0.791193
YDR172W	2.17335	2.10015	-0.0494298
YDR173C	1.03034	0.944295	-0.125806
YDR174W	3.28761	3.21662	-0.0314913
YDR175C	0.922092	0.892624	-0.0468581
YDR176W	0.869959	0.776449	-0.164056
YDR177W	1.40829	1.41541	0.00728249
YDR178W	0.759451	0.957467	0.334266
YDR179C	0.417465	0.423829	0.0218275
YDR180W	0.450834	0.415692	-0.117083
YDR181C	0.54967	0.622576	0.179683
YDR182W	0.658099	0.750695	0.189921
YDR183W	0.708574	0.664982	-0.0916022
YDR184C	1.0403	0.845291	-0.299477
YDR185C	1.20082	0.751494	-0.676188
YDR186C	1.22444	1.23469	0.0120364
YDR188W	2.21131	2.03575	-0.119339
YDR189W	0.873545	0.814805	-0.100426
YDR190C	1.54294	1.60298	0.055072
YDR191W	0.522585	0.595409	0.188216
YDR192C	0.596341	0.585756	-0.0258384
YDR194C	1.1838	1.13285	-0.0634601
YDR195W	1.00495	0.920866	-0.126068
YDR196C	0.649007	0.76312	0.233677
YDR197W	0.623336	0.666093	0.0957131
YDR198C	0.66473	0.562399	-0.241174
YDR200C	0.486679	0.520418	0.0967013
YDR201W	0.607814	0.671482	0.143718
YDR202C	0.543236	0.583677	0.103591
YDR204W	0.605966	0.572006	-0.0832061
YDR205W	0.670341	0.641566	-0.0632982
YDR206W	0.842988	0.78727	-0.0986536
YDR207C	0.583865	0.529977	-0.139705
YDR208W	1.19279	1.32785	0.154751
YDR211W	1.15597	1.12252	-0.0423622
YDR212W	1.33309	1.25666	-0.0851826
YDR213W	0.881472	0.819426	-0.105303
YDR214W	1.93833	2.19623	0.180214
YDR216W	0.38377	0.855755	1.15696
YDR217C	0.533616	0.514141	-0.0536367
YDR218C	0.259357	0.277922	0.0997398
YDR219C	0.686513	0.813037	0.244034
YDR221W	0.98138	0.869959	-0.173865
YDR223W	0.554388	0.69094	0.317663
YDR224C	8.56359	5.91431	-0.534007
YDR225W	9.57015	6.68394	-0.517842
YDR226W	2.49617	1.89227	-0.399598
YDR227W	0.526236	0.52984	0.00984606
YDR228C	0.90801	0.79053	-0.199888
YDR229W	0.826359	0.836089	0.0168881
YDR231C	0.828838	0.968406	0.224521
YDR232W	1.69377	1.47508	-0.199446
YDR233C	3.846	3.60274	-0.094266
YDR234W	1.26931	1.06227	-0.256888
YDR235W	0.653214	0.581814	-0.166998
YDR236C	0.885611	0.815491	-0.119004
YDR237W	0.859257	0.793488	-0.114882
YDR238C	1.27691	1.23972	-0.0426366
YDR239C	0.581553	0.531537	-0.129742
YDR240C	0.665389	0.586594	-0.181837
YDR242W	0.801608	0.935225	0.222415
YDR243C	0.640276	0.663897	0.052267
YDR244W	0.591877	0.598985	0.0172239
YDR245W	1.36688	1.36784	0.00101067
YDR246W	1.09569	1.22652	0.162722
YDR247W	0.640959	1.01306	0.660423
YDR251W	0.728833	0.931785	0.354409
YDR252W	0.659406	0.613323	-0.104521
YDR253C	0.805003	0.743429	-0.114799
YDR254W	0.625815	0.733685	0.229424
YDR255C	0.631372	0.781633	0.308
YDR256C	1.03087	0.857499	-0.265654
YDR257C	0.819318	0.767907	-0.0934905
YDR258C	0.711942	1.09737	0.624219
YDR259C	0.47768	0.535556	0.164993
YDR260C	1.25032	1.46537	0.228971
YDR261C	0.996414	1.0997	0.142289
YDR263C	0.450761	0.452483	0.0055012
YDR264C	0.984577	1.00841	0.0345016
YDR265W	0.796758	0.801895	0.00927229
YDR266C	0.95338	0.926477	-0.0412952
YDR267C	0.889336	0.832092	-0.095985
YDR268W	1.15498	0.803236	-0.523971
YDR270W	0.797029	0.606442	-0.394263
YDR272W	0.738847	0.84016	0.185389
YDR273W	0.537813	0.518639	-0.0523727
YDR275W	1.6034	1.26757	-0.339064
YDR276C	3.2255	3.92573	0.283438
YDR277C	0.722957	1.26483	0.806961
YDR279W	0.701432	0.597357	-0.23171
YDR280W	1.58562	1.35633	-0.225344
YDR281C	1.50556	0.933113	-0.69018
YDR283C	0.561348	0.569442	0.0206525
YDR284C	1.18252	1.06024	-0.157482
YDR285W	0.359903	0.326589	-0.140129
YDR287W	0.510199	0.575839	0.174606
YDR288W	0.744329	0.724025	-0.0399009
YDR289C	0.722751	0.708251	-0.0292377
YDR292C	0.770638	0.743103	-0.052492
YDR293C	0.952432	1.28751	0.434895
YDR294C	0.894675	1.04013	0.217329
YDR295C	0.660374	0.595606	-0.148927
YDR296W	1.35795	1.36851	0.0111764
YDR297W	0.982261	1.07246	0.126751
YDR298C	1.52738	1.75846	0.203252
YDR299W	1.38095	1.10214	-0.325346
YDR300C	1.21459	0.961509	-0.337095
YDR301W	0.631297	0.629022	-0.00520809
YDR302W	0.628656	0.717358	0.190422
YDR303C	0.686281	0.680109	-0.0130342
YDR304C	1.1103	1.14199	0.0406037
YDR305C	1.06284	0.975042	-0.124391
YDR308C	0.986689	1.04456	0.0822317
YDR309C	1.88207	2.24173	0.252295
YDR310C	1.00635	0.917513	-0.133333
YDR311W	0.760858	0.807142	0.0851949
YDR312W	0.749263	0.745544	-0.00717947
YDR313C	0.875533	0.911329	0.0578094
YDR314C	0.638802	0.699665	0.131295
YDR315C	0.561579	0.609797	0.118839
YDR316W	0.576785	0.654433	0.182211
YDR317W	0.458046	0.441583	-0.0528059
YDR318W	0.843237	0.8257	-0.0303209
YDR320C	0.692395	0.718818	0.054032
YDR320C-A	1.12517	1.17682	0.0647567
YDR321W	1.08629	0.917784	-0.243184
YDR322W	0.814227	0.839732	0.0444983
YDR322C-A	1.32862	1.4192	0.0951541
YDR323C	0.555911	0.550169	-0.0149789
YDR324C	1.26089	1.04281	-0.273967
YDR325W	0.611705	0.617413	0.0133988
YDR326C	0.720011	0.767751	0.0926186
YDR328C	1.04098	1.05716	0.0222493
YDR329C	0.606445	0.624878	0.0431982
YDR330W	0.56631	0.550466	-0.0409396
YDR331W	0.999749	0.935575	-0.0957122
YDR332W	0.595857	0.546726	-0.124149
YDR334W	0.948672	0.858557	-0.143996
YDR335W	0.744446	0.805351	0.11345
YDR337W	0.831202	0.8181	-0.0229221
YDR339C	1.39217	1.44948	0.0582015
YDR341C	1.37173	1.1832	-0.213303
YDR342C	0.776775	2.98964	1.9444
YDR343C	0.66721	2.58486	1.95387
YDR345C	3.40875	1.33502	-1.35238
YDR346C	1.60465	1.49075	-0.106215
YDR347W	1.17426	1.07911	-0.121915
YDR349C	1.15234	1.20274	0.0617531
YDR350C	0.634776	0.783517	0.303716
YDR351W	0.86696	1.16299	0.423808
YDR353W	2.17483	2.10042	-0.0502237
YDR354W	1.03705	0.97902	-0.0830805
YDR356W	0.511542	0.535136	0.0650538
YDR358W	0.507185	0.625975	0.303593
YDR359C	0.932076	0.996057	0.0957795
YDR361C	1.27421	0.978704	-0.380657
YDR362C	0.624689	0.621155	-0.00818458
YDR363W	0.573209	0.59426	0.052034
YDR363W-A	1.57772	1.51388	-0.0595922
YDR364C	0.898963	0.834733	-0.106947
YDR365C	1.0513	0.944242	-0.154951
YDR367W	0.706669	0.645722	-0.130122
YDR368W	0.780581	0.658504	-0.245355
YDR369C	0.430877	0.384477	-0.16438
YDR372C	0.915961	0.951925	0.0555615
YDR373W	0.632429	0.752523	0.250832
YDR375C	0.718593	0.765798	0.0917891
YDR376W	0.631958	0.645633	0.0308874
YDR377W	1.94997	1.91818	-0.0237105
YDR378C	2.0342	1.75115	-0.216153
YDR379W	0.536672	0.659546	0.297433
YDR379C-A	0.603596	0.928119	0.620726
YDR380W	1.22885	1.56968	0.353159
YDR381W	5.57923	5.85558	0.0697454
YDR381C-A	1.89542	1.77111	-0.0978673
YDR382W	7.95228	8.04162	0.0161174
YDR383C	2.10499	2.00258	-0.0719494
YDR384C	1.20044	0.98954	-0.278737
YDR385W	5.8068	5.13412	-0.177627
YDR386W	0.559424	0.550181	-0.024035
YDR388W	0.904011	1.03172	0.190633
YDR389W	0.968007	0.944171	-0.0359685
YDR390C	0.734275	0.725125	-0.0180904
YDR392W	0.715298	0.701694	-0.0277037
YDR393W	1.20912	1.16343	-0.0555695
YDR394W	1.6031	1.55862	-0.0405963
YDR395W	1.2808	1.07093	-0.258183
YDR397C	1.41237	1.14501	-0.302763
YDR398W	1.65936	1.27805	-0.376678
YDR399W	3.4112	3.22137	-0.0826041
YDR400W	0.778517	0.74273	-0.0678907
YDR402C	0.310922	0.2948	-0.0768129
YDR403W	0.318547	0.285621	-0.157402
YDR404C	1.28149	1.46678	0.194833
YDR405W	1.24993	1.17568	-0.0883573
YDR406W	0.440962	0.459688	0.0599993
YDR407C	0.622999	0.655827	0.0740857
YDR408C	1.52741	1.52715	-0.000249113
YDR409W	0.767124	0.67032	-0.19461
YDR410C	1.24104	1.13339	-0.130911
YDR411C	1.0987	1.19116	0.116573
YDR412W	1.00823	0.862258	-0.225639
YDR414C	0.781808	0.675219	-0.211459
YDR416W	1.04316	0.902138	-0.209539
YDR418W	7.06639	7.217	0.0304261
YDR419W	0.478144	0.467424	-0.0327129
YDR420W	0.926952	1.15238	0.314044
YDR421W	0.477396	0.524013	0.134417
YDR422C	0.832315	0.782238	-0.0895223
YDR423C	1.03565	0.976269	-0.0851813
YDR424C	1.51926	1.51974	0.000456945
YDR425W	0.529799	0.539734	0.0268039
YDR427W	1.24717	1.28413	0.0421313
YDR428C	1.27861	0.994426	-0.362639
YDR429C	2.29273	2.09033	-0.133336
YDR430C	0.734338	0.779747	0.086561
YDR432W	3.59367	3.80702	0.0832009
YDR434W	0.654361	0.730233	0.158269
YDR435C	0.523761	0.572889	0.129349
YDR436W	0.594271	0.608965	0.0352385
YDR437W	0.824247	0.805038	-0.0340195
YDR438W	0.849201	0.86795	0.031506
YDR439W	0.737768	0.692266	-0.091841
YDR440W	0.67939	0.573319	-0.244902
YDR441C	1.96541	1.34684	-0.545252
YDR443C	0.448397	0.448381	-5.39587e-05
YDR446W	0.734536	0.606683	-0.275891
YDR447C	5.47205	5.68736	0.0556764
YDR448W	1.14246	1.02305	-0.159269
YDR449C	1.34079	1.0805	-0.311389
YDR450W	5.19926	5.2686	0.0191143
YDR451C	1.67604	1.98994	0.247669
YDR452W	0.968201	0.78694	-0.299054
YDR453C	0.655371	0.474657	-0.465425
YDR454C	1.18411	0.980277	-0.272541
YDR456W	0.749764	0.700352	-0.0983569
YDR457W	0.702331	0.713088	0.0219297
YDR458C	0.678592	0.73836	0.121779
YDR459C	0.786051	0.805257	0.034827
YDR460W	1.15727	1.25524	0.117244
YDR461W	2.43974	2.88319	0.240937
YDR462W	1.31271	1.38226	0.0744814
YDR463W	1.13294	1.11806	-0.0190829
YDR464W	0.603815	0.590071	-0.0332199
YDR465C	0.985862	0.75777	-0.379626
YDR466W	0.766061	0.747758	-0.0348878
YDR468C	1.20786	1.1958	-0.0144835
YDR469W	0.840438	0.848169	0.0132099
YDR470C	0.697164	0.685707	-0.0239052
YDR471W	5.83382	5.6756	-0.0396657
YDR472W	1.3716	1.15901	-0.242972
YDR473C	0.558478	0.508746	-0.134556
YDR475C	0.829407	0.708364	-0.22759
YDR477W	0.88762	0.915169	0.0440953
YDR478W	0.824601	0.772658	-0.0938663
YDR479C	1.02621	0.99257	-0.0480828
YDR480W	0.773006	0.759549	-0.0253354
YDR481C	1.18197	1.4349	0.27976
YDR482C	0.701801	0.633491	-0.147737
YDR483W	1.18925	1.41975	0.255594
YDR484W	0.484362	0.479019	-0.0160046
YDR485C	0.635132	0.68179	0.10227
YDR486C	0.928915	1.04042	0.163547
YDR487C	1.24038	1.33288	0.103767
YDR488C	0.502249	0.441326	-0.186557
YDR489W	1.03955	0.944373	-0.138533
YDR490C	0.666938	0.608444	-0.132428
YDR492W	1.23216	1.02311	-0.268236
YDR493W	1.10481	1.08284	-0.0289897
YDR494W	0.816829	0.857174	0.0695534
YDR495C	0.449462	0.439098	-0.0336553
YDR496C	1.47125	1.22298	-0.266646
YDR497C	2.11973	2.13808	0.0124352
YDR498C	0.783889	0.921375	0.233139
YDR499W	0.890422	0.826285	-0.10785
YDR500C	5.51696	5.8788	0.0916484
YDR501W	0.685443	0.602524	-0.186018
YDR502C	2.64986	2.52362	-0.0704252
YDR503C	0.945081	1.00132	0.0833919
YDR504C	0.457243	0.432478	-0.0803364
YDR505C	0.722905	0.793292	0.134046
YDR507C	0.900879	0.971346	0.108652
YDR508C	3.40877	2.81996	-0.273578
YDR510W	1.83273	1.7629	-0.0560434
YDR511W	1.2565	1.30481	0.0544251
YDR512C	0.762886	0.832649	0.12624
YDR513W	0.908356	1.1687	0.363577
YDR515W	0.511688	0.461843	-0.147863
YDR516C	0.600182	0.773839	0.366632
YDR517W	1.15458	1.02014	-0.178604
YDR518W	0.547208	0.533078	-0.0377421
YDR519W	1.10053	1.08837	-0.0160309
YDR522C	0.319135	0.348579	0.127319
YDR523C	0.272238	0.248862	-0.129526
YDR524C	1.1431	1.14501	0.0024078
YDR525W-A	1.34104	1.70987	0.350534
YDR527W	1.60677	1.25426	-0.357322
YDR528W	1.44779	1.25046	-0.211393
YDR529C	2.06479	2.23649	0.115238
YDR530C	0.965288	1.01502	0.072475
YDR531W	0.740176	0.714208	-0.0515239
YDR532C	0.501057	0.546571	0.125432
YDR533C	0.727423	0.593337	-0.293942
YDR534C	0.331873	0.322286	-0.0422883
YDR536W	0.493293	0.588878	0.255523
YDR538W	0.90855	0.849656	-0.0966873
YDR539W	0.684486	0.621796	-0.138581
YDR540C	0.307471	0.274326	-0.16456
YDR542W	0.237728	0.239504	0.0107374
YDR545W	0.943311	0.872971	-0.111799
YEL072W	0.705464	0.864547	0.293372
YEL071W	2.01076	2.05137	0.0288446
YEL069C	0.381711	0.421	0.141338
YEL066W	0.60148	0.621176	0.046485
YEL065W	0.883869	0.950603	0.10501
YEL064C	0.486121	0.523152	0.105913
YEL063C	1.35279	1.54779	0.194273
YEL062W	0.501575	0.555376	0.146998
YEL061C	0.588791	0.634147	0.107062
YEL060C	1.04382	1.52953	0.551216
YEL059C-A	0.641521	0.989509	0.625216
YEL058W	1.02066	1.32277	0.37406
YEL056W	1.06796	0.917685	-0.218789
YEL055C	0.998577	0.842179	-0.245746
YEL054C	5.98233	6.25541	0.0643983
YEL053C	0.522654	0.513946	-0.0242393
YEL052W	0.544797	0.552984	0.0215192
YEL051W	1.37845	1.21943	-0.17684
YEL050C	0.89639	0.89474	-0.00265784
YEL049W	0.648861	0.580827	-0.1598
YEL048C	0.671753	0.57894	-0.214518
YEL047C	0.786021	0.673654	-0.22256
YEL046C	8.02391	5.91259	-0.440514
YEL044W	1.59983	1.02092	-0.648049
YEL043W	0.771561	0.716456	-0.106902
YEL042W	1.092	0.993367	-0.136568
YEL041W	0.413001	0.528358	0.355371
YEL040W	4.84983	4.69408	-0.0470911
YEL039C	1.78656	1.98484	0.151832
YEL038W	0.664894	0.613635	-0.115744
YEL037C	1.31477	1.16052	-0.180035
YEL036C	1.28384	1.43638	0.161968
YEL034W	18.231	16.7545	-0.121849
YEL032W	0.984741	1.00908	0.0352291
YEL031W	1.17942	1.21346	0.0410495
YEL030W	0.501461	0.427768	-0.229306
YEL029C	0.604206	0.577851	-0.0643426
YEL027W	2.62345	2.85824	0.123658
YEL026W	4.83743	4.73164	-0.0319023
YEL024W	2.0436	2.72504	0.415166
YEL022W	0.573088	0.577812	0.0118438
YEL021W	1.13209	1.12837	-0.00475124
YEL020W-A	3.00049	3.06896	0.0325511
YEL019C	0.405044	0.387146	-0.0652015
YEL018W	1.57052	1.33926	-0.229812
YEL017C-A	4.28763	3.87145	-0.147308
YEL017W	0.825847	1.02214	0.30764
YEL016C	0.661767	0.808072	0.288162
YEL015W	1.0004	0.000826134	-10.2419
YEL013W	0.803992	0.906363	0.172909
YEL012W	0.425875	0.491378	0.206404
YEL011W	0.640576	0.936159	0.547383
YEL009C	9.0305	10.0171	0.14959
YEL006W	1.04511	0.959605	-0.123144
YEL005C	0.49201	0.501243	0.0268219
YEL004W	0.564711	0.546865	-0.0463262
YEL003W	0.862543	0.86053	-0.00337085
YEL002C	0.918093	0.97322	0.084127
YEL001C	0.851164	0.957626	0.170025
YER001W	1.23489	1.34423	0.1224
YER002W	1.4707	1.39161	-0.0797474
YER003C	0.810501	0.861772	0.0884916
YER004W	1.18943	1.16058	-0.0354252
YER005W	0.955655	0.875392	-0.12656
YER006W	1.49791	1.32459	-0.177406
YER007W	0.521344	0.463911	-0.168386
YER007C-A	1.04669	0.979423	-0.0958274
YER008C	0.642392	0.699116	0.122079
YER009W	1.61118	1.69757	0.075354
YER010C	0.759741	0.812735	0.0972783
YER011W	0.29966	0.318379	0.0874173
YER012W	2.27089	1.97137	-0.204062
YER013W	0.47097	0.499932	0.0860967
YER014W	0.377148	0.384991	0.0296946
YER014C-A	0.449562	0.405686	-0.148156
YER015W	0.40562	0.366433	-0.146578
YER016W	0.769172	0.817118	0.0872394
YER017C	0.811802	0.894298	0.139628
YER018C	1.22889	1.10801	-0.149392
YER019W	1.50606	1.29677	-0.215859
YER019C-A	3.07251	2.85396	-0.106454
YER020W	0.744301	0.82516	0.148787
YER021W	1.31242	1.40012	0.0933279
YER022W	0.54327	0.558152	0.0389899
YER023W	1.07098	1.15007	0.102787
YER024W	0.743517	0.621328	-0.259012
YER025W	1.95326	1.8514	-0.0772664
YER026C	1.16431	1.45144	0.318012
YER027C	0.6838	0.7205	0.075425
YER028C	0.642396	0.412841	-0.637876
YER029C	0.83569	0.870734	0.0592644
YER030W	0.895215	0.934947	0.062651
YER031C	1.02609	1.14321	0.155938
YER032W	0.578068	0.714811	0.306322
YER033C	0.362744	0.463338	0.353114
YER035W	1.94212	2.00051	0.042731
YER036C	2.30047	1.97706	-0.218573
YER037W	0.820115	1.25031	0.608386
YER038C	0.44896	0.500352	0.156357
YER039C	0.842137	0.773878	-0.121948
YER040W	0.628882	0.669094	0.0894188
YER041W	0.442665	0.432118	-0.0347908
YER042W	1.21892	1.02452	-0.250665
YER043C	3.9207	3.69015	-0.0874322
YER044C	1.48564	1.52391	0.0366974
YER044C-A	0.482955	0.486661	0.0110285
YER045C	0.424294	0.815604	0.942805
YER046W	0.721705	0.802086	0.152347
YER047C	0.573865	0.658873	0.199291
YER048C	0.656366	0.674681	0.0397048
YER048W-A	1.08151	1.30508	0.271088
YER049W	1.05231	0.86174	-0.288233
YER050C	0.710978	0.864728	0.282441
YER051W	0.474418	0.503121	0.084747
YER052C	1.44178	1.32829	-0.118281
YER053C	0.712294	1.58047	1.14981
YER054C	0.557146	0.747619	0.424248
YER055C	1.87156	2.46008	0.394464
YER056C	3.49486	3.38676	-0.045327
YER056C-A	4.57571	4.77391	0.0611772
YER057C	1.38971	1.33146	-0.0617789
YER058W	0.689608	0.676758	-0.0271369
YER059W	0.747074	0.710196	-0.0730337
YER060W	0.927461	0.676471	-0.455258
YER060W-A	0.492205	0.504093	0.034431
YER061C	0.459013	0.542663	0.241522
YER062C	0.531202	1.04717	0.979156
YER063W	1.86331	2.05643	0.142276
YER065C	1.34938	1.36077	0.0121222
YER067W	0.555423	2.2034	1.98807
YER068W	1.06579	1.072	0.00836911
YER069W	0.653823	0.643072	-0.0239191
YER070W	2.96477	3.03273	0.0326951
YER072W	5.07907	6.60876	0.379816
YER073W	3.62421	2.94453	-0.299629
YER074W	4.787	5.17918	0.113601
YER074W-A	0.774062	0.843228	0.123474
YER075C	0.727274	0.678222	-0.100743
YER078C	0.573589	0.634822	0.146335
YER080W	0.549973	0.596199	0.116435
YER081W	2.43991	2.50447	0.0376808
YER082C	1.00836	0.960661	-0.0699083
YER083C	1.02724	1.02784	0.000832205
YER086W	1.13355	1.04364	-0.119222
YER087W	0.529639	0.495068	-0.097382
YER087C-B	1.22581	1.24625	0.0238568
YER088C	1.25403	1.46048	0.219869
YER089C	1.60584	1.64171	0.0318745
YER090W	0.906663	0.90769	0.00163232
YER091C	3.01413	2.3112	-0.383099
YER092W	1.49821	1.53645	0.0363568
YER093C	0.523498	0.537702	0.0386215
YER093C-A	0.927992	0.845853	-0.133704
YER094C	1.7733	1.80816	0.0280841
YER095W	1.08343	1.1405	0.074069
YER096W	0.250399	0.269797	0.107649
YER098W	0.394221	0.470278	0.25451
YER099C	0.905818	0.949874	0.0685138
YER100W	0.801489	0.842044	0.0712117
YER101C	0.462146	0.472784	0.0328302
YER102W	5.86436	6.11772	0.0610218
YER103W	0.492414	0.536085	0.12259
YER104W	0.694358	0.634559	-0.129926
YER105C	0.72857	0.700994	-0.0556659
YER106W	0.207864	0.195506	-0.0884293
YER107C	0.915806	0.866298	-0.0801794
YER109C	0.579094	0.586653	0.0187103
YER110C	1.15984	1.02695	-0.175564
YER111C	0.484615	0.549853	0.182207
YER112W	0.904415	0.911982	0.0120191
YER113C	0.779355	0.691885	-0.171748
YER114C	0.643228	0.668824	0.0562961
YER115C	0.815779	0.654679	-0.31739
YER116C	0.862839	0.781258	-0.143292
YER117W	5.99354	6.38934	0.09226
YER118C	1.00148	1.07162	0.0976707
YER119C	0.781526	0.898209	0.200758
YER120W	1.48714	1.60368	0.108841
YER122C	1.25794	1.36561	0.118482
YER123W	0.815671	0.847501	0.0552287
YER124C	2.07049	2.93773	0.504734
YER125W	0.980801	1.07263	0.129113
YER126C	1.8454	1.63284	-0.176547
YER127W	1.35697	1.04318	-0.379397
YER129W	0.690667	0.701739	0.022943
YER131W	5.29894	5.38355	0.0228541
YER132C	0.774434	0.726819	-0.0915459
YER133W	1.44796	1.67521	0.210325
YER136W	0.920581	1.01381	0.139174
YER139C	0.549768	0.611796	0.154226
YER141W	0.860941	1.07058	0.314402
YER142C	0.396153	0.411274	0.0540439
YER143W	0.812624	0.819991	0.0130196
YER144C	0.656532	0.883319	0.428069
YER145C	2.13494	1.84786	-0.208343
YER146W	1.3692	1.22191	-0.164194
YER147C	0.731127	0.695697	-0.0716631
YER148W	1.37519	1.46348	0.0897778
YER149C	0.718844	0.657716	-0.128214
YER150W	0.512397	0.637184	0.314447
YER151C	0.785872	0.803444	0.031902
YER152C	0.831117	0.811487	-0.0344846
YER153C	0.755327	0.610805	-0.306389
YER154W	1.37743	1.30227	-0.0809476
YER155C	0.86187	0.941567	0.127593
YER157W	0.577919	0.567474	-0.0263121
YER159C	1.37242	1.80076	0.391882
YER161C	0.749122	0.813458	0.118867
YER162C	0.437728	0.468702	0.0986368
YER164W	0.591559	0.564294	-0.0680734
YER165W	2.34754	2.3384	-0.0056301
YER166W	0.645413	0.690511	0.0974417
YER167W	0.75987	0.875003	0.203535
YER168C	0.659925	0.63759	-0.0496746
YER169W	0.573894	0.562998	-0.0276528
YER170W	0.707644	0.686156	-0.0444877
YER171W	0.663831	0.67136	0.0162693
YER172C	0.574679	0.594409	0.0486993
YER173W	0.615421	0.591305	-0.0576709
YER174C	0.782106	0.707844	-0.143932
YER175C	0.613406	0.581658	-0.07667
YER176W	1.19757	1.11553	-0.10238
YER177W	3.50423	4.12222	0.234324
YER178W	1.25366	1.38672	0.145524
YER179W	0.310736	0.399852	0.363774
YER180C	0.662824	0.658294	-0.00989259
YER180C-A	0.806821	0.799267	-0.0135715
YER183C	0.625736	0.600343	-0.0597658
YER185W	0.269147	0.283474	0.074819
YER190W	0.854829	0.806007	-0.084842
YFL062W	0.327379	0.464173	0.503704
YFL060C	0.510038	0.472849	-0.109222
YFL059W	0.494946	0.455654	-0.119334
YFL058W	0.36483	0.358875	-0.0237428
YFL057C	0.84259	0.855707	0.0222872
YFL056C	0.900572	0.910286	0.015479
YFL055W	0.451078	0.448295	-0.00892679
YFL053W	0.425982	0.421764	-0.0143578
YFL050C	0.608606	0.685096	0.170797
YFL049W	0.693264	0.864946	0.319205
YFL048C	0.898717	1.08604	0.273142
YFL047W	0.710099	0.787419	0.149111
YFL045C	3.58774	3.28117	-0.128865
YFL044C	1.74404	1.3935	-0.323721
YFL041W	0.770818	0.637646	-0.273636
YFL039C	4.80695	5.49918	0.194094
YFL038C	2.59806	2.72708	0.0699254
YFL037W	1.84808	1.66127	-0.153739
YFL036W	0.853727	0.875053	0.0355967
YFL034C-B	1.30317	1.16718	-0.158994
YFL034C-A	8.31199	8.32039	0.00145654
YFL033C	0.697666	0.647661	-0.107297
YFL031W	5.29455	5.93996	0.165946
YFL030W	0.605802	0.572876	-0.0806228
YFL029C	0.607722	0.550011	-0.143951
YFL028C	0.783992	0.704501	-0.154238
YFL027C	0.849344	0.824252	-0.0432627
YFL026W	5.49134	5.64075	0.0387293
YFL025C	0.942293	0.933906	-0.0128989
YFL024C	1.51036	1.56388	0.0502349
YFL023W	0.873197	0.716523	-0.285294
YFL022C	2.08979	1.85332	-0.173244
YFL021W	2.31119	2.50923	0.118608
YFL020C	0.306155	0.375454	0.294373
YFL018C	1.28522	1.42541	0.149359
YFL017W-A	1.59138	1.3346	-0.253873
YFL017C	1.32252	1.22637	-0.108887
YFL016C	1.82342	1.75564	-0.05465
YFL014W	0.497426	2.6289	2.40191
YFL013C	0.844074	0.944306	0.161886
YFL011W	0.278072	0.264819	-0.0704542
YFL010W-A	1.03947	1.08724	0.0648233
YFL010C	1.26129	1.23179	-0.0341416
YFL009W	0.801101	0.728401	-0.13725
YFL008W	0.780132	0.744044	-0.068329
YFL007W	0.870731	0.776615	-0.165028
YFL005W	1.9786	1.71259	-0.208295
YFL004W	1.39545	1.45881	0.0640522
YFL003C	0.383861	0.351164	-0.128439
YFL002C	1.01639	0.873437	-0.218685
YFL001W	1.01136	0.924641	-0.12933
YFR001W	1.41736	1.21761	-0.219163
YFR002W	1.22735	1.14856	-0.0957209
YFR003C	1.14596	1.23487	0.107806
YFR004W	2.01412	2.02391	0.00699655
YFR005C	1.20285	1.10089	-0.127788
YFR007W	0.707681	0.753614	0.0907267
YFR008W	0.537007	0.571809	0.0905907
YFR009W	1.33115	1.30965	-0.0234921
YFR010W	1.19329	1.26624	0.0856006
YFR011C	1.049	0.987355	-0.0873695
YFR013W	0.745672	0.742194	-0.00674468
YFR014C	0.946018	0.929511	-0.0253946
YFR015C	0.499607	1.07213	1.10161
YFR016C	0.587246	0.612413	0.0605405
YFR019W	0.618255	0.660504	0.0953648
YFR021W	0.881063	0.834705	-0.0779791
YFR022W	0.58507	0.583513	-0.00384348
YFR023W	0.254964	0.219973	-0.212969
YFR024C-A	0.869708	0.785447	-0.147018
YFR025C	0.834559	0.732908	-0.187382
YFR026C	0.528392	0.513603	-0.0409567
YFR027W	0.747505	0.724908	-0.0442856
YFR028C	1.18275	1.14582	-0.0457599
YFR029W	0.840287	0.7155	-0.231931
YFR030W	0.921839	0.81342	-0.180513
YFR031C	0.747872	0.760172	0.0235348
YFR031C-A	7.07322	6.2243	-0.184455
YFR032C-A	10.0022	9.76238	-0.0350182
YFR033C	4.89933	4.73678	-0.0486764
YFR034C	3.09393	2.25279	-0.457726
YFR036W	1.39175	1.03736	-0.423982
YFR037C	1.39123	1.28732	-0.111993
YFR038W	0.648482	0.556894	-0.219664
YFR040W	1.2491	1.21514	-0.039769
YFR041C	0.896158	0.9513	0.086148
YFR042W	0.77665	0.809434	0.0596496
YFR043C	0.816026	0.725839	-0.168966
YFR044C	1.2323	1.31498	0.0936907
YFR046C	0.723562	0.660302	-0.13199
YFR047C	0.770581	0.692851	-0.153402
YFR048W	0.781865	0.742566	-0.0744001
YFR049W	1.1652	1.26308	0.11636
YFR050C	1.81609	1.88557	0.0541691
YFR051C	1.67632	1.53208	-0.129798
YFR052W	1.60676	1.92778	0.26278
YFR053C	0.697675	3.21085	2.20233
YGL263W	1.86483e-17	0.000160309	42.9669
YGL258W	0.28242	0.308183	0.125945
YGL257C	0.631933	0.622792	-0.0210221
YGL256W	1.10067	1.04485	-0.075083
YGL255W	0.889874	0.981383	0.141215
YGL254W	0.886707	0.876032	-0.0174735
YGL253W	4.4889	3.11799	-0.525746
YGL252C	0.80038	0.805019	0.00833895
YGL251C	0.392153	0.44669	0.187855
YGL250W	0.471108	0.492436	0.0638786
YGL249W	0.425379	0.445664	0.0672081
YGL248W	0.701276	1.00499	0.519122
YGL247W	1.10305	1.04875	-0.0728172
YGL246C	0.780927	0.736372	-0.0847513
YGL245W	1.21664	1.12848	-0.108527
YGL244W	0.69382	0.722818	0.0590719
YGL243W	0.504711	0.514823	0.0286186
YGL241W	0.497923	0.46605	-0.0954379
YGL240W	0.739866	0.668055	-0.147296
YGL238W	0.979882	0.985705	0.00854747
YGL237C	0.60594	0.636404	0.0707669
YGL236C	0.712964	0.585577	-0.283969
YGL234W	1.07661	0.962791	-0.161198
YGL233W	0.468254	0.48661	0.0554753
YGL232W	0.748659	0.689944	-0.117829
YGL231C	0.944007	1.04335	0.144353
YGL229C	0.30343	0.307585	0.0196222
YGL228W	0.79701	0.79257	-0.00805848
YGL227W	0.463155	0.508459	0.134635
YGL226C-A	0.931353	0.897845	-0.0528612
YGL226W	1.00565	0.96579	-0.0583535
YGL225W	2.10183	1.97916	-0.0867578
YGL224C	1.21356	1.20034	-0.0158011
YGL223C	0.705134	0.713057	0.0161186
YGL222C	1.10144	1.28011	0.216876
YGL221C	1.0972	1.03654	-0.0820508
YGL220W	0.928823	0.863355	-0.105449
YGL219C	0.823148	0.848021	0.0429484
YGL216W	0.705311	0.722429	0.0345962
YGL215W	1.47769	1.43166	-0.0456587
YGL213C	0.676917	0.653044	-0.051799
YGL212W	0.634417	0.643296	0.0200505
YGL211W	1.18352	1.09998	-0.105611
YGL210W	1.78535	1.37553	-0.376215
YGL209W	2.12264	1.40221	-0.598156
YGL208W	0.671976	0.577455	-0.218702
YGL207W	0.995357	1.02088	0.0365219
YGL206C	0.856679	0.976479	0.188835
YGL205W	0.374085	0.340593	-0.135314
YGL203C	0.642137	0.597255	-0.104533
YGL202W	1.1834	1.15958	-0.0293458
YGL201C	0.649193	0.636075	-0.0294515
YGL200C	1.5346	1.32777	-0.208857
YGL198W	1.45316	1.42642	-0.0267949
YGL197W	0.629252	0.726364	0.207055
YGL196W	1.07413	1.01059	-0.087961
YGL195W	0.902172	0.906822	0.00741695
YGL194C	0.911078	0.893398	-0.0282727
YGL192W	1.07468	1.14077	0.0861049
YGL191W	1.60662	1.95907	0.286137
YGL190C	1.1608	1.10058	-0.0768566
YGL189C	6.85213	7.04271	0.0395775
YGL187C	1.81811	1.89653	0.0609272
YGL186C	0.878831	0.833502	-0.0764003
YGL184C	0.327974	0.381003	0.216217
YGL183C	0.199786	0.206655	0.0487703
YGL181W	0.722425	0.796457	0.140749
YGL180W	0.378064	0.368618	-0.0365048
YGL179C	0.444188	0.482243	0.118591
YGL178W	0.879407	0.899926	0.0332748
YGL175C	0.607773	0.564098	-0.107587
YGL174W	0.800194	0.699522	-0.193981
YGL173C	0.974407	1.01215	0.054821
YGL172W	1.00335	0.885034	-0.181015
YGL171W	0.877606	0.685181	-0.35709
YGL170C	0.314556	0.242988	-0.372436
YGL169W	0.737402	0.647594	-0.187361
YGL168W	1.39015	1.22814	-0.17877
YGL167C	1.12746	1.17554	0.060256
YGL166W	0.736408	0.661451	-0.154873
YGL164C	0.635985	0.627624	-0.0190925
YGL163C	0.553709	0.522838	-0.0827646
YGL162W	1.33067	1.30233	-0.0310631
YGL161C	0.916315	0.994939	0.118765
YGL160W	0.48181	0.545577	0.179317
YGL158W	0.228674	0.265574	0.215822
YGL157W	0.637137	0.800806	0.329849
YGL156W	0.599459	0.615954	0.0391617
YGL155W	0.685793	0.658376	-0.0588602
YGL154C	0.776213	0.735863	-0.0770158
YGL153W	0.641779	0.579004	-0.148503
YGL151W	0.599698	0.657397	0.132529
YGL150C	0.711206	0.739035	0.0553764
YGL148W	1.68925	1.29227	-0.386477
YGL147C	6.24035	6.08597	-0.0361388
YGL145W	0.497175	0.538068	0.114034
YGL144C	0.512127	0.486562	-0.07388
YGL143C	0.560827	0.526405	-0.0913844
YGL142C	0.484483	0.453367	-0.095767
YGL141W	0.414288	0.477205	0.203977
YGL139W	0.532905	0.531638	-0.00343439
YGL137W	1.13904	1.11182	-0.0348978
YGL136C	0.945746	0.821978	-0.202353
YGL135W	8.06387	8.16413	0.017827
YGL134W	0.975777	0.980174	0.00648606
YGL133W	0.756736	0.812101	0.10187
YGL131C	0.494148	0.578833	0.228204
YGL130W	0.620302	0.657951	0.0850095
YGL129C	0.656312	0.65649	0.000390351
YGL128C	0.730605	0.638188	-0.19511
YGL127C	1.05479	1.02308	-0.0440424
YGL126W	1.01219	0.982152	-0.0434595
YGL125W	1.04881	0.997247	-0.0727329
YGL124C	0.508472	0.507269	-0.00341836
YGL123W	8.83356	8.93003	0.01567
YGL122C	2.16393	2.29034	0.0819049
YGL121C	1.05436	1.20246	0.18962
YGL120C	1.14755	0.95065	-0.271565
YGL119W	0.454198	0.417072	-0.123025
YGL116W	0.829274	0.931576	0.167824
YGL115W	1.06099	1.14823	0.114005
YGL113W	0.504058	0.468537	-0.105426
YGL112C	0.675429	0.671132	-0.00920704
YGL111W	0.921923	0.800313	-0.204081
YGL110C	0.671885	0.660419	-0.024832
YGL107C	0.861565	0.812352	-0.0848546
YGL106W	1.68665	1.41226	-0.256163
YGL105W	1.88342	1.93029	0.0354669
YGL104C	0.479815	0.475518	-0.012977
YGL103W	13.5017	13.1564	-0.0373762
YGL100W	0.79911	0.771221	-0.0512496
YGL099W	0.828915	0.681785	-0.281907
YGL098W	0.791035	0.785123	-0.0108229
YGL097W	1.09393	1.01296	-0.110942
YGL096W	0.358978	0.439188	0.290942
YGL095C	0.481955	0.563594	0.225756
YGL094C	0.610176	0.620252	0.0236293
YGL093W	0.524884	0.565992	0.108783
YGL092W	0.860999	0.840673	-0.0344675
YGL091C	0.796747	0.82245	0.0458053
YGL090W	0.497704	0.518172	0.0581405
YGL089C	0.50749	0.460312	-0.140766
YGL087C	3.57442	3.12218	-0.195159
YGL086W	0.564904	0.59835	0.0829843
YGL084C	0.547508	0.568838	0.0551383
YGL083W	0.690482	0.724342	0.0690674
YGL078C	1.61585	1.34703	-0.262509
YGL077C	2.0491	1.53356	-0.418101
YGL076C	5.59315	5.71296	0.0305755
YGL075C	0.577476	0.513701	-0.168832
YGL073W	1.18767	1.05855	-0.166044
YGL071W	1.29442	1.06218	-0.285281
YGL070C	1.27903	1.25646	-0.0256846
YGL068W	1.33083	1.31922	-0.0126353
YGL067W	0.816007	0.727975	-0.164694
YGL066W	0.735653	0.741924	0.0122444
YGL065C	0.656652	0.6697	0.0283867
YGL064C	0.562131	0.575321	0.0334608
YGL063W	0.877331	0.732049	-0.261181
YGL062W	0.937104	0.951054	0.0213176
YGL061C	0.593234	0.600817	0.0183229
YGL060W	0.492866	0.505957	0.0378181
YGL059W	0.532424	0.567685	0.0925171
YGL058W	1.19389	1.18311	-0.0130901
YGL057C	0.681188	0.587774	-0.212791
YGL056C	1.54463	1.3613	-0.18228
YGL055W	3.59079	3.46731	-0.0504865
YGL054C	1.60363	1.69259	0.077889
YGL053W	0.714519	0.838404	0.230672
YGL051W	0.593253	0.585376	-0.0192838
YGL050W	0.84323	0.828532	-0.0253691
YGL049C	0.569891	0.713333	0.32389
YGL048C	1.16716	1.28968	0.144006
YGL047W	1.23453	1.06955	-0.206963
YGL045W	0.475456	0.586786	0.303521
YGL044C	0.668442	0.740437	0.147574
YGL043W	1.07083	1.02962	-0.0566107
YGL040C	1.45906	1.19666	-0.286031
YGL039W	0.709031	0.61687	-0.200881
YGL038C	1.06501	1.00025	-0.090499
YGL037C	1.39525	2.38502	0.773481
YGL035C	1.09123	1.17397	0.105443
YGL033W	0.279386	0.321985	0.204735
YGL032C	0.84013	1.07664	0.357857
YGL031C	4.59208	4.63171	0.0123974
YGL030W	8.41899	8.36835	-0.00870407
YGL029W	1.2512	0.974543	-0.360517
YGL028C	3.40792	4.48722	0.396929
YGL027C	0.65509	0.666188	0.0242367
YGL026C	1.10409	1.06562	-0.0511621
YGL025C	0.884242	0.811671	-0.123545
YGL023C	0.735602	0.75294	0.0336089
YGL022W	1.21521	1.2547	0.0461365
YGL021W	0.782488	1.1386	0.541122
YGL020C	0.865337	0.972762	0.168824
YGL019W	1.11692	1.07124	-0.0602511
YGL018C	0.695826	0.702402	0.0135723
YGL017W	0.614058	0.575203	-0.0943036
YGL016W	0.575677	0.536976	-0.100401
YGL014W	0.988992	0.992261	0.0047607
YGL013C	0.666232	0.696039	0.0631443
YGL012W	1.30459	1.24678	-0.0653937
YGL011C	1.61541	1.75443	0.119101
YGL009C	2.54509	2.1862	-0.219287
YGL008C	15.6694	15.3896	-0.0259934
YGL006W	0.447529	0.586562	0.390302
YGL005C	0.587955	0.609093	0.0509562
YGL004C	0.582781	0.561865	-0.0527281
YGL003C	0.875788	0.849712	-0.0436067
YGL002W	0.697402	0.714895	0.0357426
YGL001C	0.869588	0.870164	0.000955884
YGR002C	0.660761	0.709677	0.103033
YGR003W	0.513441	0.496858	-0.0473654
YGR004W	0.542787	0.493708	-0.136729
YGR005C	0.68055	0.700116	0.0408921
YGR006W	0.950449	1.02967	0.115503
YGR007W	1.13628	1.43034	0.33204
YGR008C	1.22279	2.40224	0.974207
YGR009C	0.691152	0.799406	0.209926
YGR010W	0.839768	0.781141	-0.104409
YGR012W	0.781027	0.712364	-0.132757
YGR013W	0.811335	0.863035	0.0891207
YGR014W	1.66077	2.09254	0.333404
YGR019W	0.689617	0.986033	0.515841
YGR020C	1.25711	1.462	0.217832
YGR023W	0.585888	0.775814	0.405087
YGR024C	0.714655	0.746431	0.0627626
YGR027C	6.1188	6.54438	0.0970088
YGR028W	0.541055	0.669995	0.308374
YGR029W	0.740327	0.778894	0.0732625
YGR030C	2.08121	1.75149	-0.248846
YGR031C-A	1.14377	1.05799	-0.112462
YGR032W	0.58411	1.08082	0.887808
YGR033C	1.06481	1.06901	0.00568111
YGR034W	4.1826	4.44638	0.0882335
YGR036C	0.773869	0.751377	-0.0425516
YGR037C	2.08401	1.9011	-0.132525
YGR038W	1.10642	1.08385	-0.0297329
YGR040W	1.4638	1.53352	0.0671283
YGR041W	1.10189	1.08737	-0.0191401
YGR043C	0.306627	0.335822	0.131214
YGR044C	0.610167	0.928979	0.606443
YGR046W	0.644766	0.817325	0.342133
YGR047C	0.469982	0.501523	0.0937123
YGR048W	0.793478	0.893205	0.170801
YGR049W	1.14303	1.24925	0.128197
YGR054W	1.6129	1.54354	-0.0634216
YGR055W	4.32191	3.84743	-0.167776
YGR056W	0.7874	0.809365	0.0396946
YGR057C	0.628357	0.575874	-0.125833
YGR058W	0.662986	0.616838	-0.104088
YGR059W	0.351194	0.330583	-0.0872566
YGR060W	3.97858	4.01696	0.0138508
YGR061C	1.08709	1.05399	-0.0446083
YGR062C	1.42351	1.51532	0.0901701
YGR063C	1.69171	1.71437	0.0191931
YGR065C	0.877048	0.823002	-0.0917587
YGR068C	0.607139	0.649478	0.0972525
YGR070W	0.379119	0.669329	0.820065
YGR072W	0.598433	0.638493	0.0934806
YGR074W	1.48432	1.40803	-0.0761246
YGR075C	0.971835	0.91516	-0.0866874
YGR076C	0.821072	0.83449	0.0233869
YGR077C	0.826753	0.73679	-0.166202
YGR078C	1.5649	1.31436	-0.251707
YGR080W	1.03733	0.962457	-0.108085
YGR081C	1.40321	1.31692	-0.0915571
YGR082W	1.24466	1.20549	-0.0461424
YGR083C	1.04114	0.956391	-0.122491
YGR084C	1.33307	1.16379	-0.195911
YGR085C	6.74208	6.87004	0.0271261
YGR086C	2.50743	3.50705	0.484051
YGR087C	0.330085	0.352923	0.0965137
YGR088W	0.553505	0.617719	0.158353
YGR089W	0.691174	0.722094	0.0631386
YGR090W	1.04175	1.14552	0.136988
YGR091W	0.82236	1.05856	0.364259
YGR092W	0.809266	1.22153	0.594006
YGR094W	1.61055	1.45221	-0.149308
YGR095C	0.986196	0.91814	-0.10316
YGR096W	0.653509	0.647636	-0.0130246
YGR097W	0.540428	0.984575	0.865399
YGR098C	0.410502	0.448007	0.126131
YGR099W	0.559395	0.585131	0.0648911
YGR100W	0.476372	0.527274	0.146463
YGR101W	0.729268	0.718564	-0.0213318
YGR102C	0.678069	0.847011	0.320949
YGR103W	1.47331	1.19404	-0.303215
YGR104C	0.709231	0.709669	0.000890706
YGR105W	1.12968	0.993179	-0.185787
YGR106C	1.20492	1.20467	-0.000305446
YGR108W	1.03547	2.32475	1.16679
YGR109C	0.669995	0.824476	0.299327
YGR110W	0.33716	0.394122	0.225208
YGR112W	0.536235	0.515782	-0.0561058
YGR113W	0.847756	0.870109	0.0375458
YGR116W	0.800964	0.824463	0.0417173
YGR118W	6.13943	6.49589	0.0814238
YGR119C	1.42604	1.37386	-0.0537885
YGR120C	1.15642	1.09462	-0.079239
YGR121C	1.11287	1.04813	-0.0864753
YGR122W	0.559479	0.529433	-0.0796362
YGR123C	0.740419	0.607602	-0.285215
YGR124W	1.57522	1.61154	0.0328887
YGR128C	1.00175	0.87677	-0.19225
YGR129W	0.649265	0.616754	-0.0741106
YGR130C	0.824364	0.96527	0.22765
YGR131W	0.570663	0.553494	-0.0440722
YGR132C	1.02776	1.0815	0.0735412
YGR133W	0.681233	0.666137	-0.0323285
YGR134W	0.593059	0.571399	-0.0536766
YGR135W	1.61325	1.71254	0.0861724
YGR136W	1.31361	1.61124	0.294632
YGR138C	0.681372	1.03416	0.601943
YGR140W	0.545974	0.537504	-0.0225577
YGR141W	0.71808	0.685307	-0.0673956
YGR142W	1.17861	1.06174	-0.150663
YGR143W	0.713194	1.05785	0.568774
YGR144W	0.373019	0.298925	-0.319466
YGR145W	0.893553	0.742544	-0.267075
YGR146C	1.87437	2.16807	0.210004
YGR147C	1.21664	1.13918	-0.0949078
YGR148C	4.50342	4.52599	0.00721417
YGR150C	0.528179	0.546337	0.0487648
YGR152C	0.890488	0.770706	-0.208415
YGR154C	0.741816	0.805242	0.118361
YGR155W	3.95169	3.69765	-0.0958607
YGR156W	2.03047	1.96969	-0.0438461
YGR157W	1.46459	1.84061	0.329688
YGR158C	1.36824	1.22407	-0.160639
YGR159C	4.51322	2.71894	-0.73111
YGR162W	1.87789	1.72407	-0.123287
YGR163W	0.814535	0.764134	-0.0921514
YGR165W	0.75907	0.810633	0.0948166
YGR166W	0.596264	0.747008	0.325172
YGR167W	1.11221	1.25722	0.176815
YGR169C	0.778203	0.642505	-0.276438
YGR170W	0.617446	0.589673	-0.0663971
YGR171C	0.555365	0.516307	-0.105206
YGR172C	0.840917	0.798922	-0.0739094
YGR173W	1.10402	1.03186	-0.097507
YGR174C	0.712473	0.953871	0.420958
YGR175C	2.34312	2.51146	0.100095
YGR177C	1.44401	1.21991	-0.2433
YGR178C	1.42499	1.24383	-0.196167
YGR179C	0.589714	0.640074	0.118222
YGR180C	1.06994	0.995091	-0.104625
YGR181W	1.6938	1.57933	-0.100952
YGR183C	2.74068	3.06986	0.163635
YGR184C	0.612139	0.625988	0.0322748
YGR185C	1.73406	1.71679	-0.0144355
YGR186W	0.801258	0.834839	0.0592304
YGR187C	1.03819	0.769312	-0.43243
YGR188C	0.395019	0.391074	-0.0144792
YGR189C	2.75299	4.86266	0.820747
YGR191W	1.20574	1.24723	0.0487995
YGR192C	21.9247	19.8359	-0.144439
YGR193C	0.996646	0.907147	-0.135744
YGR194C	0.4563	0.522289	0.194864
YGR195W	1.51306	1.44235	-0.0690446
YGR196C	0.615871	0.602357	-0.0320087
YGR197C	0.86212	0.787205	-0.131149
YGR198W	0.964653	0.940808	-0.0361102
YGR199W	0.754914	0.692743	-0.123993
YGR200C	1.10064	0.984229	-0.161273
YGR202C	0.908963	0.801594	-0.181349
YGR203W	0.901162	0.774744	-0.218067
YGR204W	1.51897	1.51296	-0.00572157
YGR205W	0.55981	0.601124	0.102727
YGR206W	0.925315	0.970431	0.0686803
YGR207C	0.724947	0.828568	0.192744
YGR208W	1.13387	1.17821	0.0553387
YGR209C	1.60406	1.56929	-0.0316154
YGR211W	2.00168	1.67475	-0.257263
YGR212W	0.467991	0.480376	0.0376834
YGR213C	0.498937	0.557478	0.160059
YGR214W	3.72659	3.57594	-0.0595312
YGR215W	1.05368	0.97723	-0.108661
YGR216C	0.636946	0.63542	-0.00346055
YGR217W	0.416087	0.45791	0.138179
YGR218W	0.81306	0.856559	0.0751909
YGR220C	1.07374	1.10285	0.0385867
YGR221C	0.615175	0.641969	0.061508
YGR222W	0.678526	0.797916	0.233831
YGR223C	0.60697	0.740191	0.286273
YGR224W	0.40554	0.450204	0.150736
YGR225W	0.165167	0.193256	0.226594
YGR227W	0.557253	0.594429	0.0931702
YGR229C	1.23351	1.25471	0.0245856
YGR230W	0.590018	0.77486	0.393177
YGR231C	0.959698	1.04652	0.124941
YGR232W	0.943538	0.93342	-0.0155553
YGR233C	0.917751	1.08492	0.241414
YGR234W	6.65793	7.01779	0.0759426
YGR236C	0.630698	0.672018	0.09155
YGR238C	0.393223	0.364769	-0.108367
YGR239C	1.02009	0.970399	-0.0720497
YGR240C	2.54706	2.52891	-0.0103119
YGR241C	1.09028	1.12124	0.0403937
YGR244C	0.817648	1.08789	0.411986
YGR245C	1.03644	0.856825	-0.274559
YGR246C	0.523021	0.513547	-0.0263721
YGR247W	0.455832	0.48707	0.0956256
YGR248W	0.279882	0.415157	0.568841
YGR249W	0.27852	0.281788	0.0168248
YGR250C	0.525846	0.703192	0.419278
YGR251W	0.982345	0.760091	-0.370057
YGR252W	0.926078	0.956572	0.0467401
YGR253C	1.77184	1.89555	0.097372
YGR254W	2.39386	3.95458	0.724189
YGR255C	0.47075	0.592428	0.331679
YGR256W	0.342556	0.363305	0.0848423
YGR257C	0.942681	0.939326	-0.00514396
YGR258C	0.400241	0.420409	0.070926
YGR260W	0.907954	0.743111	-0.289042
YGR261C	0.542908	0.581396	0.0988141
YGR262C	0.723461	0.699903	-0.0477594
YGR263C	0.47001	0.458582	-0.0355102
YGR264C	1.76498	1.7008	-0.053441
YGR266W	0.702926	0.708104	0.0105878
YGR267C	1.23404	1.2144	-0.0231439
YGR268C	1.39285	1.40953	0.0171768
YGR270W	0.745475	0.786182	0.0767047
YGR271W	0.466588	0.492168	0.077002
YGR271C-A	0.696119	0.611557	-0.186847
YGR274C	0.521168	0.547945	0.0722822
YGR275W	0.603912	0.650189	0.106521
YGR276C	0.516857	0.484779	-0.092438
YGR277C	0.616813	0.64555	0.0656964
YGR278W	0.725241	0.694628	-0.0622202
YGR279C	3.24606	3.26837	0.00988309
YGR280C	1.09425	0.885304	-0.305695
YGR281W	0.615852	0.666825	0.114724
YGR282C	3.01935	4.70533	0.640061
YGR283C	1.3431	2.0805	0.631362
YGR284C	0.97242	0.955871	-0.0247642
YGR285C	2.11307	1.86211	-0.182401
YGR286C	0.705722	0.477511	-0.563567
YGR287C	0.362478	0.318403	-0.18704
YGR288W	0.418045	0.476325	0.188288
YGR289C	0.3696	0.465793	0.333722
YGR292W	0.571243	0.551185	-0.0515672
YGR294W	0.440832	0.335932	-0.392059
YGR295C	1.19705	1.37807	0.203161
YGR296W	0.854402	0.803576	-0.0884803
YHL048W	0.495265	0.610854	0.302627
YHL047C	0.520157	0.553595	0.089884
YHL046C	0.257981	0.244327	-0.0784495
YHL043W	0.592196	0.708619	0.258934
YHL040C	0.793148	0.651922	-0.28289
YHL039W	0.782876	0.720357	-0.120071
YHL038C	0.591008	0.56745	-0.0586852
YHL036W	0.669283	0.830466	0.311305
YHL035C	0.506057	0.671578	0.408256
YHL034C	1.14614	1.51665	0.404103
YHL033C	12.846	13.6178	0.0841748
YHL032C	0.688627	0.674546	-0.0298056
YHL031C	0.99149	1.07734	0.119805
YHL030W	0.510925	0.529721	0.0521219
YHL028W	0.749684	0.76315	0.0256829
YHL027W	1.00396	1.18478	0.238918
YHL025W	1.71394	1.77342	0.0492188
YHL024W	0.503666	0.828232	0.717567
YHL023C	0.525093	0.552383	0.0730965
YHL022C	0.354373	0.308129	-0.201736
YHL021C	0.627107	1.29354	1.04454
YHL020C	1.36144	1.78872	0.393793
YHL019C	0.54832	0.642273	0.22817
YHL016C	0.514991	0.612432	0.250001
YHL015W	8.72892	9.63546	0.14255
YHL014C	1.22585	1.09766	-0.159351
YHL013C	0.728554	0.697411	-0.063028
YHL011C	1.96046	1.97165	0.008212
YHL010C	0.485589	0.565684	0.220259
YHL009C	0.50591	0.610677	0.271529
YHL007C	1.27871	1.19607	-0.0963844
YHL006C	1.39203	1.31913	-0.0776083
YHL004W	1.03907	1.00842	-0.0431891
YHL003C	0.973619	0.986328	0.0187107
YHL002W	1.16478	1.29444	0.15228
YHL001W	4.83742	5.36245	0.148653
YHR001W	0.758881	0.878267	0.210786
YHR001W-A	1.29456	1.6547	0.354109
YHR002W	0.728994	0.794226	0.123642
YHR003C	1.0488	0.966276	-0.118229
YHR004C	0.622193	0.614563	-0.0178033
YHR005C	1.47301	1.69415	0.201794
YHR005C-A	3.7829	3.90302	0.0450994
YHR006W	1.1169	1.73028	0.631514
[truncated: 3,772 more rows]

## Sheet: S. pombe norm. factor calcs.
Individual replicates factors
Strain	Chromatin sample	S. cerevisiae Rpb1 reads (aligned 1 time)	S. pombe Rpb1 reads (aligned 1 time)	Norm factor (avg all sample reads/replicate reads)	Norm SacCer_Reads (1 time)_(C * E)
WT	RPB1-1	32451784	2920413	1.22953	3.99003e+07
	RPB1-2	42368151	4412479	0.813766	3.44778e+07
	RPB1-3	36320473	3292480	1.09058	3.96105e+07
s6e3	RPB1-4	36936594	4362071	0.82317	3.04051e+07
	RPB1-5	36855836	2912227	1.23298	4.54426e+07
	RPB1-6	41415279	3644686	0.985195	4.08021e+07
		Ave	3590726
Summed replicates factors
Strain	Chromatin sample	S. cerevisiae Rpb1 reads (1 time)	Summed S. cere reads	S. pombe Rpb1 reads (1 time)	Summed S. pombe reads	Norm factor (sum all reads/sum reads for each strain)	Norm summed S. cere. Reads (D * G)
WT	RPB1-1	32451784	111140408	2920413	10625372	1.01382	1.12676e+08
	RPB1-2	42368151		4412479
	RPB1-3	36320473		3292480
s6e3	RPB1-4	36936594	115207709	4362071	10918984	0.986555	1.13659e+08
	RPB1-5	36855836		2912227
	RPB1-6	41415279		3644686
			Ave	3590726	10772178

## Sheet: Normalized occs._replicates
Spike-in normalized Rpb1 occupancies
Gene	WT_SPK-1	WT_SPK-2	WT_SPK-3	s6e3_SPK-1	s6e3_SPK-2	s6e3_SPK-3
YAL068C	120.459	146.733	137.331	123.47	138.269	153.356
YAL067C	139.49	114.709	133.25	82.5887	127.707	123.304
YAL064W	151.096	133.33	151.32	95.5517	167.822	164.937
YAL063C	192.193	196.21	240.977	182.632	240.099	214.835
YAL062W	351.463	370.889	414.694	300.078	421.061	376.224
YAL060W	649.246	624.641	778.02	678.347	897.738	870.052
YAL059W	608.871	507.232	503.13	354.307	546.759	423.123
YAL058W	259.694	254.122	307.559	209.134	300.85	268.083
YAL056W	353.154	339.212	363.856	296.594	436.113	386.146
YAL055W	297.343	284.555	359.626	267.229	351.039	320.691
YAL054C	218.128	231.278	264.853	225.537	309.783	287.7
YAL053W	423.937	394.227	474.571	717.921	991.399	831.125
YAL051W	290.819	257.153	282.568	225.082	334.198	292.364
YAL049C	399.489	385.905	413.966	336.402	487.085	431.897
YAL048C	250.782	250.296	288.383	229.565	341.698	305.903
YAL047C	198.244	183.724	206.878	152.563	236.109	216.514
YAL046C	299.114	341.714	414.387	333.949	459.764	400.917
YAL044C	421.118	461.46	506.167	504.615	659.871	588.698
YAL043C	412.522	447.799	550.876	417.108	548.374	467.32
YAL042W	596.39	614.122	756.925	510.989	664.376	586.184
YAL041W	503.626	464.786	507.077	399.185	617.668	516.438
YAL040C	1287.83	1221.44	1436.14	1265.45	1786.63	1535.52
YAL039C	618.909	686.119	848.849	672.944	817.841	787.863
YAL038W	6970.36	6615.18	8627.38	5544.59	7224.94	5853.07
YAL036C	741.701	689.118	801.251	512.027	719.262	565.06
YAL035W	859.619	836.709	933.596	760.866	1052.25	871.275
YAL034W-A	369.42	336.08	388.062	293.754	436.819	392.95
YAL034C	348.624	339.46	374.222	390.541	548.892	522.168
YAL033W	458.378	419.633	479.237	350.489	487.557	434.393
YAL032C	424.424	448.044	525.447	374.001	509.975	448.275
YAL031C	263.549	244.694	276.301	228.979	334.319	302.068
YAL030W	460.249	455.359	565.673	380.869	533.218	456.536
YAL029C	402.023	369.874	391.914	317.912	469.186	408.789
YAL028W	179.659	178.416	215.118	180.702	232.234	230.777
YAL027W	305.97	279.031	334.923	242.633	354.861	318.932
YAL026C	244.367	232.754	250.651	207.391	307.028	275.932
YAL025C	854.18	830.654	988.902	674.438	889.464	685.023
YAL024C	289.838	267.19	285.939	233.343	347.303	312.769
YAL023C	791.573	792.969	930.04	661.994	901.875	760.776
YAL022C	359.688	389.059	478.299	387.775	517.54	451.029
YAL021C	441.42	449.855	547.718	429.774	574.964	512.001
YAL020C	369.113	412.734	513.092	348.288	410.819	362.252
YAL019W	382.535	368.8	413.838	316.464	436.472	374.939
YAL017W	218.36	206.111	222.198	231.701	349.63	337.524
YAL016W	519.433	462.535	524.915	467.631	692.693	629.913
YAL015C	315.357	312.656	345.681	263.94	392.799	329.401
YAL014C	486.391	491.949	643.855	546.95	707.705	641.222
YAL013W	410.759	450.234	556.227	443.351	565.77	514.755
YAL012W	1587.99	1646.16	2055.67	1420.89	1832.53	1565.01
YAL011W	388.879	375.544	406.84	286.813	434.928	380.799
YAL010C	284.745	246.696	276.945	217.073	339.384	308.716
YAL009W	302.354	269.263	313.264	237.153	346.424	331.6
YAL008W	301.127	287.906	316.107	236.518	346.543	319.632
YAL007C	513.166	460.263	536.476	422.536	654.674	565.404
YAL005C	2412.69	2504.22	3074.64	2074.68	3009.93	3026.1
YAL003W	4646.21	3966.59	4659.52	3251.35	4732.84	3799.36
YAL002W	302.071	265.582	286.41	202.696	327.874	290.719
YAL001C	255.65	235.79	252.61	212.537	334.371	294.609
YAR002W	571.16	515.507	566.91	447.055	661.577	561.788
YAR002C-A	591.624	550.128	620.012	502.322	734.136	621.977
YAR003W	404.342	376.125	442.036	352.259	491.538	441.225
YAR007C	424.957	368.808	433.818	354.644	518.499	464.925
YAR008W	336.109	324.752	380.672	264.238	388.258	348.209
YAR014C	411.643	404.509	461.316	398.937	543.589	493.938
YAR015W	350.841	353.65	406.729	378.78	506.977	464.624
YAR018C	338.541	304.875	329.084	360.149	534.403	467.029
YAR019C	235.409	219.393	241.587	219.096	333.568	309.424
YAR020C	235.706	216.335	271.224	218.521	311.868	300.073
YAR027W	346.209	312.744	369.724	385.254	525.814	549.064
YAR031W	242.073	219.393	268.337	196.81	287.876	261.431
YAR033W	309.887	297.709	323.736	238.128	351.65	325.288
YAR035W	103.131	126.697	153.547	105.782	140.301	127.514
YAR042W	375.842	366.422	420.936	328.388	448.034	404.316
YAR050W	145.79	152.849	180.85	118.628	154.208	141.873
YAR071W	553.471	543.246	616.469	465.678	676.235	578.288
YBL108C-A	81.2467	88.7197	97.6741	71.7541	102.712	114.107
YBL106C	249.43	236.26	256.468	183.388	270.763	246.212
YBL105C	392.939	382.506	417.362	343.171	504.598	441.171
YBL103C	356.796	339.812	397.362	307.056	438.697	404.808
YBL102W	409.184	387.784	444.126	379.809	546.66	487.633
YBL101C	268.941	270.454	302.886	274.301	402.507	362.013
YBL099W	1158.01	1134.81	1395.61	1211.69	1659.63	1496.11
YBL098W	202.745	197.728	235.076	158.175	228.648	211.511
YBL097W	360.256	330.806	371.964	293.932	432.913	374.19
YBL093C	563.498	519.436	622.428	423.291	577.567	524.882
YBL092W	4016.45	3317	3967.78	3176.49	4666.27	3774.47
YBL091C-A	1173.17	1098.04	1292.75	776.685	1149.35	957.092
YBL091C	381.432	400.748	467.412	345.582	470.773	434.821
YBL090W	478.007	401.614	464.484	322.137	566.434	457.898
YBL089W	398.274	372.83	447.184	300.581	444.124	397.93
YBL088C	260.559	235.486	245.763	184.504	293.513	259.941
YBL087C	2260.35	1908.14	2290.86	1735.01	2525.59	2052.92
YBL085W	387.389	368.216	397.024	337.107	508.187	461.736
YBL084C	319.782	304.392	336.945	280.466	407.522	373.238
YBL082C	365.62	375.191	469.143	319.426	390.058	339.917
YBL080C	278.097	257.992	289.382	219.743	313.067	287.536
YBL079W	491.896	443.675	472.701	355.845	538.428	465.218
YBL078C	241.407	225.821	250.942	276.891	439.909	425.1
YBL076C	1054.68	975.469	1099.51	807.562	1185.34	966.832
YBL075C	301.376	301.483	333.722	261.804	361.245	338.782
YBL074C	413.325	368.287	422.162	332.122	497.869	427.805
YBL072C	3378.61	2888.01	3221.2	2645.33	4101.41	3288.29
YBL071W-A	697.963	675.018	806.499	474.666	670.797	552.87
YBL069W	587.608	541.489	607.679	396.025	583.583	498.323
YBL068W	506.31	465.596	505.561	342.135	502.495	426.013
YBL067C	348.246	310.582	327.848	237.72	367.215	328.52
YBL066C	382.215	365.077	401.963	362.537	521.308	468.792
YBL064C	315.443	301.766	351.892	376.863	540.674	577.521
YBL063W	242.249	215.656	242.435	195.514	292.444	263.753
YBL061C	494.736	457.384	479.761	519.303	767.872	654.821
YBL060W	336.26	317.349	350.665	314.451	458.091	401.957
YBL059C-A	335.846	316.558	357.969	269.401	410.271	381.513
YBL058W	600.485	601.142	707.666	531.081	750.388	689.496
YBL057C	501.132	483.808	607.396	413.764	552.398	469.63
YBL056W	718.79	700.42	791.035	602.135	868.234	768.899
YBL055C	502.477	483.633	543.527	386.69	554.86	453.371
YBL054W	638.356	577.998	606.752	453.989	616.295	458.66
YBL052C	303.198	253.423	268.254	209.084	354.035	302.903
YBL051C	477.739	444.615	493.889	426.582	600.659	535.185
YBL050W	414.676	372.151	430.571	380.102	552.401	522.986
YBL049W	369.454	371.543	432.91	365.511	472.133	456.986
YBL047C	475.397	480.456	542.443	474.88	663.761	615.544
YBL046W	336.217	336.347	408.269	294.906	421.053	375.182
YBL045C	837.174	804.708	932.496	807.534	1129.61	1046.56
YBL043W	171.862	162.819	209.176	268.446	359.036	339.214
YBL042C	885.019	834.383	936.316	707.06	987.851	801.539
YBL041W	1001.18	916.007	1103.38	871.019	1250.83	1067.97
YBL040C	655.762	543.711	593.171	474.694	722.518	665.791
YBL039C	965.378	882.891	971.792	614	871.243	659.213
YBL038W	537.704	505.991	575.961	512.277	731.732	635.369
YBL037W	316.521	299.94	339.313	290.136	422.76	375.251
YBL036C	502.001	393.272	447.103	326.268	556.403	451.493
YBL035C	414.133	372.777	412.869	312.412	467.335	404.395
YBL034C	247.446	222.528	245.252	200.533	303.095	269.9
YBL033C	603.891	640.45	779.229	599.594	743.084	653.344
YBL032W	502.909	475.941	588.694	408.133	573.121	511.182
YBL031W	488.968	430.596	500.285	388.913	586.086	495.691
YBL030C	1912.64	1799.66	2294.2	1972.9	2708.68	2386.06
YBL028C	663.437	477.874	549.565	383.626	573.833	437.929
YBL027W	3378.27	2935.56	3433.16	2754.13	4022.28	3289.6
YBL026W	593.865	475.523	572.911	454.013	721.08	654.632
YBL025W	456.951	446.291	501.205	316.013	459.864	420.451
YBL024W	618.351	561.094	621.461	455.677	704.766	571.375
YBL023C	310.984	321.769	358.749	304.665	434.992	386.77
YBL022C	439.034	411.415	449.447	375.062	545.08	484.913
YBL021C	421.723	430.445	524.259	357.636	464.858	410.433
YBL020W	359.777	329.759	365.805	262.715	381.689	348.039
YBL019W	319.846	270.287	268.369	201.971	331.338	285.225
YBL018C	522.105	449.889	552.336	337.377	525.514	424.015
YBL017C	444.974	418.616	446.694	383.492	568.616	490.056
YBL016W	583.034	567.474	701.464	603.173	783.641	676.931
YBL015W	215.557	236.055	278.418	232.378	302.636	320.23
YBL014C	388.494	352.937	384.4	292.491	433.219	367.334
YBL013W	190.784	194.597	249.948	143.492	206.999	194.921
YBL011W	489.788	470.208	526.442	375.491	548.316	493.249
YBL009W	405.537	371.947	403.869	283.569	442.6	405.061
YBL008W	254.644	242.351	270.694	209.329	294.393	265.299
YBL007C	461.279	469.933	540.745	496.645	679.726	624.018
YBL006C	586.966	618.036	777.497	578.427	724.407	668.554
YBL005W	711.607	604.717	664.862	386.075	609.95	536.709
YBL004W	547.319	466.67	490.131	346.231	545.795	461.823
YBL003C	3598.34	2843.63	3457.89	2062.01	3213.58	2820.25
YBL002W	3615.62	2802.28	3291.78	2126.28	3255.85	2878.43
YBL001C	1537.9	1330.23	1583.79	921.577	1469.12	1213.3
YBR001C	325.428	301.742	328.817	300.228	447.391	430.095
YBR002C	812.034	767.17	888.179	672.975	921.975	807.595
YBR003W	342.925	337.237	375.322	314.608	483.153	455.028
YBR004C	366.853	299.106	311.316	301.349	481.318	419.922
YBR005W	376.978	384.648	458.546	469.597	591.21	553.854
YBR006W	313.585	315.321	361.56	263.424	390.351	365.655
YBR008C	472.404	450.833	481.468	384.341	569.426	519.008
YBR009C	3897.46	3354.73	4739.38	2647.04	3825.49	3382
YBR010W	4558.36	3640.69	4784.26	2837.25	4318.24	3646.14
YBR011C	1195.97	1122.78	1354.83	846.147	1199.14	1035.36
YBR014C	372.855	336.638	390.999	296.279	450.089	414.646
YBR015C	587.112	561.79	627.58	510.872	725.595	639.242
YBR016W	582.855	577.984	666.539	573.982	834.872	720.547
YBR017C	470.125	429.759	486.798	372.968	560.214	488.247
YBR018C	112.68	112.475	119.835	97.6993	148.23	146.049
YBR019C	219.169	215.07	245.999	194.519	284.415	263.66
YBR020W	384.303	358.465	420.691	285.84	424.39	395.241
YBR021W	500.003	467.111	483.561	425.628	624.68	538.426
YBR022W	442.627	405.613	450.659	381.732	599.993	553.79
YBR023C	476.051	456.61	501.314	654.197	934.048	802.616
YBR024W	427.292	387.616	430.835	239.423	369.481	328.624
YBR025C	1564.84	1446.18	1704.64	1245.46	1759.16	1525.44
YBR026C	261.155	233.853	250.961	225.795	339.305	342.608
YBR029C	747.52	669.479	785.035	575.167	817.684	718.331
YBR030W	452.187	429.398	478.757	326.095	486.601	411.849
YBR031W	3496.4	3367.41	4087.98	2906.81	3914.9	3188.39
YBR034C	1018.79	975.149	1120.02	891.622	1200.85	991.747
YBR035C	733.042	679.385	772.514	630.526	960.446	803.641
YBR036C	635.46	618.841	751.947	609.414	820.918	727.794
YBR037C	340.127	339.274	403.074	311.74	408.227	386.614
YBR038W	453.053	424.991	462.507	435.129	632.573	585.296
YBR039W	734.532	679.687	819.58	660.482	972.306	856.482
YBR040W	96.1594	94.8805	86.189	75.6224	110.027	111.112
YBR041W	340.635	307.112	340.17	295.709	442.605	403.72
YBR042C	370.462	335.367	358.468	274.668	425.388	375.853
YBR043C	413.897	398.258	463.036	395.208	571.365	500.996
YBR044C	368.193	365.484	425.468	367.04	532.276	469.278
YBR045C	156.806	137.037	157.189	108.851	164.437	154.652
YBR046C	188.201	197.386	195.588	160.743	244.507	241.85
YBR048W	2422.17	2093.81	2437.65	1997.75	2976.73	2388.14
YBR049C	467.209	453.729	542.175	383.828	537.397	481.497
YBR050C	326.5	313.8	399.696	280.928	372.313	347.029
YBR052C	352.038	355.139	419.163	425.937	608.311	654.094
YBR054W	344.104	338.921	395.291	356.025	513.668	550.387
YBR055C	298.67	269.492	276.573	214.036	343.41	300.818
YBR057C	446.022	406.102	474.876	382.486	530.462	461.211
YBR058C	319.434	296.013	331.519	264.51	389.747	340.406
YBR058C-A	443.306	389.772	447.948	349.778	538.552	513.185
YBR059C	324.276	314.295	337.512	320.986	481.317	460.391
YBR060C	370.943	337.488	369.212	270.503	399.244	354.169
YBR061C	468.265	444.609	522.471	369.457	517.974	433.481
YBR065C	282.369	243.272	297.613	245.479	371.57	314.737
YBR066C	505.825	445.662	520.674	384.248	560.197	534.394
YBR067C	789.367	782.824	1079.79	705.636	922.356	885.339
YBR068C	2846.8	2558.62	2975.23	2801.74	4146.19	3592.01
YBR069C	1650.85	1547.1	1883.77	1107.11	1575.86	1256.29
YBR070C	467.889	392.634	460.054	343.075	553.61	511.498
YBR072W	244.167	253.38	326.869	340.851	429.742	459.267
YBR073W	414.551	378.276	405.735	382.251	582.802	494.739
YBR076W	212.474	189.512	210.815	252.119	400.705	360.81
YBR077C	822.548	732.77	876.95	791.96	1208.85	1083.66
YBR078W	2827.39	2592.32	3093.32	2546.51	3587.18	3050.19
YBR079C	1092.58	1035.72	1136.29	933.633	1325.95	1085.96
YBR080C	362.3	331.557	382.052	293.305	431.253	399.227
YBR081C	296.196	269.702	296.485	242.178	357.728	317.677
YBR082C	1276.36	1177.67	1382.92	1065.36	1461.33	1380.63
YBR083W	757.907	714.798	843.091	761.261	1111.04	976.587
YBR084W	651.317	605.742	673.687	414.884	595.269	463.16
YBR084C-A	3164.96	2809.52	3205.54	2583.03	3753.35	3067.31
YBR085W	168.722	178.073	201.173	123.278	178.696	185.004
YBR086C	615.123	562.07	595.703	510.504	770.376	709.167
YBR087W	531.428	474.269	591.06	413.624	612.735	542.88
YBR088C	831.239	756.705	926.331	700.091	977.812	841.048
YBR089C-A	866.53	811.717	992.824	699.923	1019.91	916.669
YBR091C	610.717	604.227	705.269	642.536	898.188	797.889
YBR092C	917.523	879.016	1155.2	1155.07	1535.97	1300.44
YBR093C	826.562	878.752	1074.28	1116.06	1463.5	1256.6
YBR094W	304.035	285.737	305.644	232.6	348.101	306.049
YBR095C	370.025	329.267	373.872	301.62	425.818	380.734
YBR097W	228.165	194.191	214.235	163.891	254.84	228.499
YBR098W	325.374	305.524	325.791	221.243	345.402	318.034
YBR101C	1193.43	1081	1176.06	895.357	1404.4	1236.16
YBR102C	303.607	286.555	308.278	263.491	390.938	350.574
YBR103W	348.316	340.979	397.418	308.903	417.127	382.356
YBR104W	441.544	414.458	483.41	338.59	486.62	407.22
YBR105C	335.525	333.27	383.001	486.803	655.176	573.944
YBR106W	1772.42	1710.19	2146.55	1296.5	1701.77	1437.28
YBR107C	467.317	475.873	553.858	340.419	471.068	426.849
YBR108W	239.475	244.831	274.162	219.387	302.506	274.476
YBR109C	747.746	720.707	832.458	728.957	1081.23	937.157
YBR110W	280.044	260.515	292.324	253.201	367.661	326.874
YBR111C	322.477	301.265	359.306	312.255	459.815	471.129
YBR111W-A	425.346	305.243	344.501	268.068	462.976	410.872
YBR112C	708.909	714.802	825.835	648.407	858.052	761.915
YBR114W	260.042	258.373	285.337	234.106	327.273	287.968
YBR115C	430.409	414.64	464.223	328.321	462.092	417.204
YBR117C	340.379	336.981	400.652	248.399	340.362	332.463
YBR118W	8108.16	7514.84	9710.04	7971.57	10761.2	8768.19
YBR119W	560.626	465.826	505.983	371.994	610.52	512.594
YBR120C	473.454	360.773	394.436	314.837	521.198	449.341
YBR121C	854.415	739.796	807.235	621.762	926.447	766.543
YBR122C	802.163	642.327	738.503	480.328	722.647	634.91
YBR123C	340.142	289.854	328.404	245.268	379.443	341.815
YBR125C	407.842	396.125	473.692	290.467	393.082	384.768
YBR126C	433.951	475.517	593.047	650.329	837.679	980.997
YBR127C	753.802	720.343	844.565	683.163	956.933	883.515
YBR128C	346.546	349.315	371.224	277.837	414.626	387.962
YBR129C	344.92	306.384	347.933	274.168	426.581	380.292
YBR130C	498.135	423.182	452.158	378.923	591.422	506.62
YBR131W	224.18	207.523	234.287	168.883	254.032	228.538
YBR132C	208.333	214.861	230.845	300.463	420.955	398.514
YBR133C	503.416	478.069	531.33	401.886	586.275	506.108
YBR135W	505.25	506.903	659.224	504.579	680.445	571.57
YBR136W	189.885	175.946	183.263	146.831	227.522	205.921
YBR137W	338.535	306.7	337.697	300.104	475.063	417.968
YBR139W	284.082	288.443	327.844	391.694	584.56	628.199
YBR140C	296.679	268.99	287.296	238.291	370.838	326.663
YBR142W	466.291	379.3	419.518	281.059	431.543	363.336
YBR143C	1082.57	908.93	1000.74	820.178	1220.25	1036.51
YBR145W	265.066	260.825	309.372	209.465	292.335	270.46
YBR146W	467.829	416.808	481.145	406.084	613.816	526.283
YBR147W	122.798	109.11	120.404	121.933	173.371	172.534
YBR148W	140.017	115.973	130.818	99.5623	156.91	144.553
YBR149W	388.055	396.597	454.102	457.578	656.105	681.122
YBR150C	297.833	272.014	297.825	269.242	418.904	371.717
YBR151W	467.558	449.473	525.533	433.474	613.85	626.675
YBR152W	380.602	358.62	415.589	283.115	408.813	373.755
YBR153W	715.828	669.8	730.449	534.795	769.654	651.056
YBR154C	1157.23	901.241	984.868	724.818	1213.75	962.362
YBR155W	414.618	372.18	411.913	268.368	397.34	330.644
YBR156C	274.205	245.972	252.665	227.31	363.956	312.37
YBR157C	590.421	518.787	617.148	483.366	723.224	617.299
YBR158W	1777.86	1514.86	1817.88	1852.23	2814.28	2291.68
YBR159W	443.472	417.074	470.238	391.991	574.223	506.784
YBR160W	534.533	482.344	573.325	581.294	825.733	736.224
YBR161W	394.409	344.578	399.665	322.578	488.27	458.646
YBR162C	1459.94	1387.47	1720.2	1407.19	1894.71	1609.58
YBR162W-A	1054.1	948.746	1086.56	860.742	1308.76	1135.28
YBR163W	388.972	345.899	369.548	271.09	422.167	369.808
YBR164C	476.099	411.701	454.226	370.952	558.58	483.999
YBR165W	433.264	378.068	459.242	340.113	516.05	451.998
YBR166C	401.731	366.78	407.409	337.339	497.224	430.309
YBR167C	522.392	472.528	599.281	476.766	691.897	592.632
YBR168W	209.639	175.62	199.65	172.611	268.412	251.616
YBR169C	189.218	190.567	222.259	230.495	337.621	343.03
YBR170C	403.856	380.455	412.37	346.611	489.571	438.817
YBR171W	560.502	444.453	486.802	346.764	611.336	494.54
YBR172C	863.863	798.135	885.821	690.136	967.571	812.414
YBR173C	825.396	834.816	1034.12	699.708	891.922	810.131
YBR175W	430.775	422.439	507.307	336.2	450.65	384.901
YBR176W	359.833	339.468	398.977	254.292	365.625	338.714
YBR177C	412.962	398.25	447.602	339.547	496.037	498.042
YBR179C	295.913	263.48	284.617	223.305	336.266	300.838
YBR180W	199.963	190.582	209.666	120.017	177.985	169
YBR181C	2800.29	2524.35	2915.43	2455.36	3540.02	2861.13
YBR182C	232.284	228.302	253.829	174.934	243.158	233.471
YBR183W	287.372	276.227	308.237	334.268	482.25	512.323
YBR185C	319.086	275.251	338.297	271.764	401.488	366.68
YBR186W	295.652	248.474	283.498	162.143	246.532	219.556
YBR188C	483.861	416.495	478.621	312.308	475.789	414.773
YBR189W	3586.54	3011.7	3442.13	2746.56	4210.48	3395.15
YBR191W	3294.43	2899.38	3458.75	2767.26	4002.37	3251.63
YBR192W	481.893	429.807	459.693	315.204	499.295	433.897
YBR193C	461.728	428.17	489.276	342.576	492.371	451.574
YBR194W	412.804	384.35	411.09	326.698	465.796	434.221
YBR195C	490.453	426.074	523.447	343.939	499.659	434.992
YBR196C	2098.18	2074.12	2580.23	2046.45	2702.53	2307.18
YBR198C	592.758	580.07	636.492	445.71	648.139	566.699
YBR199W	423.061	376.339	433.843	391.09	593.86	563.094
YBR200W	271.719	254.404	271.855	239.689	357.728	324.266
YBR201W	288.81	258.464	306.346	257.463	391.373	336.512
YBR202W	491.893	483.083	548.909	472.93	653.447	596.56
YBR203W	225.326	216.666	233.766	272.231	383.41	365.133
YBR204C	206.183	185.296	210.918	175.173	275.443	260.492
YBR205W	415.088	395.63	472.443	339.79	492.228	419.526
YBR207W	467.171	448.125	517.008	389.375	597.235	504.391
YBR208C	278.964	284.511	311.001	230.046	334.077	305.906
YBR210W	375.873	300.415	365.668	270.379	421.502	381.06
YBR211C	366.95	332.662	382.99	324.626	493.584	430.16
YBR212W	291.76	299.061	327.502	347.555	490.739	447.219
YBR213W	264.894	275.708	329.659	237.713	324.2	314.626
YBR214W	268.607	272.33	321.423	310.059	415.068	435.311
YBR215W	322.575	279.711	295.675	227.949	353.179	310.683
YBR216C	309.195	258.592	286.585	240.415	359.795	326.49
YBR217W	295.698	258.898	276.249	235.419	356.706	327.601
YBR218C	445.06	453.302	519.735	407.649	565.663	499.726
YBR221C	527.781	528.727	610.337	495.181	662.944	605.171
YBR222C	308.21	321.108	364.088	314.004	431.227	382.735
YBR223C	236.907	232.966	278.707	220.419	312.883	300.697
YBR227C	288.264	268.641	299.769	233.333	363.961	320.053
YBR228W	380.586	315.038	352.162	266.201	409.557	370.526
YBR229C	268.514	248.041	280.801	228.32	325.192	294.076
YBR230C	375.385	365.645	441.631	435.674	583.833	614.766
YBR231C	408.353	417.514	507.408	342.764	447.213	418.278
YBR233W	334.594	309.535	363.868	275.188	374.551	341.076
YBR233W-A	373.998	375.505	448.956	333.945	455.258	425.9
YBR234C	453.257	428.557	500.861	425.574	599.869	576.248
YBR236C	375.759	344.415	383.027	328.552	479.684	420.101
YBR237W	255.111	227.184	250.69	216.552	323.701	283.482
YBR238C	418.495	392.593	453.612	229.896	332.62	289.069
YBR240C	181.629	179.854	223.021	165.936	224.829	216.854
YBR243C	417.305	372.049	434.211	301.501	473.283	401.645
YBR244W	418.353	326.56	367.339	257.414	423.103	376.365
YBR245C	358.831	325.863	360.849	267.168	394.501	356.831
YBR247C	639.115	584.738	620.126	417.428	595.624	481.531
YBR248C	636.619	624.855	688.092	436.861	611.121	520.288
YBR249C	1125.54	1092.1	1319	842.5	1135.01	935.721
YBR250W	156.009	128.911	140.307	93.0587	152.079	141.665
YBR251W	440.453	404.702	491.683	357.888	519.327	468.449
YBR252W	606.811	581.797	713.809	403.01	597.097	485.37
YBR253W	633.198	580.669	692.728	452.742	614.088	576.995
YBR254C	437.354	376.951	488.526	339.575	500.603	429.402
YBR255W	234.468	234.596	254.74	220.693	314.486	277.768
YBR256C	463.331	437.334	513.039	462.899	657.237	595.68
YBR257W	428.907	357.329	412.016	316.706	493.495	429.999
YBR258C	469.53	394.665	451.237	356.969	545.144	468.681
YBR260C	336.268	304.371	334.3	249.53	379.093	327.098
YBR261C	456.432	505.636	644.756	407.186	513.935	476.729
YBR262C	625.376	597.844	667.563	528.361	759.785	667.158
YBR263W	569.502	552.398	640.368	437.271	593.111	497.161
YBR264C	411.273	397.94	490.281	345.66	475.901	432.453
YBR265W	626.755	617.931	760.545	480.212	632.388	573.84
YBR267W	772.25	720.751	804.834	515.25	731.953	572.464
YBR268W	471.713	508.755	647.649	412.458	568.964	511.831
YBR272C	255.666	226.94	268.64	227.304	339.887	308.06
YBR273C	292.011	315.307	350.787	288.521	384.878	354.855
YBR274W	234.817	212.966	244.947	190.042	281.543	254.573
YBR275C	250.996	227.441	243.119	185.488	287.73	252.99
YBR276C	283.455	260.786	288.091	237.174	349.985	317.327
YBR278W	370.737	357.679	417.129	309.929	440.305	383.869
YBR279W	492.621	432.385	505.537	409.511	591.793	530.044
YBR280C	217.154	212.925	237.809	185.302	284.322	257.214
YBR281C	271.579	242.284	274.139	203.331	322.897	286.086
YBR282W	557.502	522.095	591.827	478.855	673.414	616.049
YBR283C	770.25	696.168	762.958	600.499	874.354	773.438
YBR286W	685.01	702.541	819.446	728.164	1002.81	955.466
YBR288C	388.123	336.305	360.493	376.09	571.656	510.98
YBR289W	333.135	325.466	379.137	300.42	421.241	373.21
YBR290W	544.647	510.445	599.942	511.715	717.836	638.693
YBR291C	503.379	467.617	526.867	454.836	631.711	573.434
YBR293W	360.525	309.053	351.343	258.577	404.896	339.186
YBR294W	237.9	227.495	270.105	193.076	285.203	264.054
YBR295W	262.639	258.248	306.757	331.382	450.753	393.784
YBR296C	162.767	169.316	182.186	347.352	507.03	408.281
YBR297W	213.696	216.928	236.224	306.382	442.472	413.613
YBR298C	257.615	256.868	278.534	270.175	399.664	404.634
YBR299W	320.032	288.449	322.886	238.923	351.095	333.729
YBR301W	198.108	196.923	260.007	136.201	178.588	178.052
YBR302C	226.387	203.554	201.713	167.116	286.269	266.004
YCL069W	125.263	118.845	125.74	101.901	147.351	133.362
YCL064C	466.942	338.88	388.977	258.724	391.343	328.29
YCL063W	562.313	538.522	641.602	448.446	658.51	567.176
YCL061C	309.3	266.778	292.145	225.578	341.108	303.374
YCL059C	590.736	502.197	570.747	399.389	581.389	463.041
YCL058C	969.087	869.189	984.139	719.151	1072.77	862.175
YCL058W-A	1011.25	936.809	1067.48	773.057	1116.88	910.342
YCL057W	405.91	371.077	414.896	324.497	486.845	426.897
YCL055W	802.393	695.843	890.559	666.273	947.294	793.437
YCL054W	675.966	602.179	660.686	487.554	709.054	564.388
YCL052C	333.804	304.895	337.901	303.019	458.719	428.608
YCL051W	332.457	335.006	387.845	343.839	465.6	423.716
YCL050C	676.668	646.433	763.421	506.33	754.585	630.857
YCL048W	143.036	135.405	152.296	106.651	161.997	153.88
YCL045C	432.624	408.441	471.765	376.219	539.76	489.239
YCL044C	548.584	520.648	599.003	433.919	620.352	534.152
YCL043C	1397.53	1404.37	1808.62	1389.69	1777.47	1598.55
YCL040W	294.824	334.765	420.509	926.696	1204.68	1483.69
YCL039W	313.789	316.727	366.33	292.945	388.89	372.698
YCL038C	228.42	218.754	236.253	266.644	374.092	353.584
YCL037C	1732.96	1640.98	1953.95	1583.03	2119.4	1670.02
YCL036W	678.562	653.02	733.245	432.757	563.969	461.996
YCL035C	650.145	621.414	697.074	664.463	931.248	912.648
YCL034W	388.503	419.456	535.798	441.47	549.713	521.701
YCL033C	320.176	341.565	388.398	309.576	439.281	381.399
YCL032W	357.977	352.35	419.682	328.858	449.62	387.472
YCL031C	911.038	748.68	878.955	664.204	992.994	834.191
YCL030C	405.29	402.907	450.468	433.404	584.243	522.195
YCL029C	356.737	371.788	441.008	346.865	446.117	403.292
YCL028W	358.891	355.84	435.64	348.09	446.603	408.904
YCL027W	191.927	177.277	217.278	170.785	222.965	219.231
YCL026C-A	196.794	191.189	238.749	156.767	213.502	200.822
YCL025C	726.012	759.569	965.85	883.578	1204.37	1053.5
YCL024W	254.596	245.845	269.445	216.776	325.995	304.084
YCL018W	1016.1	1061.2	1328.36	872.133	1156.08	1015.86
YCL017C	408.023	395.035	469.315	385.376	505.434	460.247
YCL016C	302.778	315.436	371.953	284.849	371.844	342.016
YCL014W	290.731	270.236	282.445	268.105	402.108	352.878
YCL012C	341.416	304.502	338.025	276.291	415.315	367.925
YCL011C	981.824	955.768	1035.82	808.715	1123.79	953.432
YCL010C	900.354	898.15	1126.79	670.063	900.681	805.455
YCL009C	828.689	875.131	1118.69	693.133	877.055	772.17
YCL008C	446.844	484.854	601.136	381.483	481.237	459.138
YCL005W-A	1868.12	1612.13	1863.49	1217.22	1850.44	1534.67
YCL005W	447.741	434.358	543.39	349.817	488.877	437.594
YCL004W	386.533	335.997	375.328	266.271	414.287	358.637
YCL001W	522.535	473.876	543.94	399.557	608.739	531.902
YCR002C	472.469	421.903	474.975	437.321	685.343	599.577
YCR003W	435.87	362.65	413.307	343.884	544.631	477.336
YCR004C	354.187	355.395	398.545	417.142	599.124	588.068
YCR005C	1222.72	1156.62	1355.44	1185.88	1683.83	1453.83
YCR008W	514.06	459.428	515.067	394.645	597.25	530.181
YCR009C	501.543	429.354	509.002	458.284	677.313	637.416
YCR010C	157.404	166.221	187.895	222.997	318.639	296.109
YCR011C	377.253	351.924	399.221	353.585	534.85	487.474
YCR012W	5756.19	5600.12	7641.64	4702.38	6211.55	5672.09
YCR014C	485.477	390.656	425.601	280.975	463.725	408.858
YCR017C	353.762	337.896	385.583	311.043	449.201	393.342
YCR018C	543.57	449.213	626.544	392.415	575.267	507.155
YCR019W	231.263	246.276	282.015	219.82	325.575	281.966
YCR020C	305.909	308.918	349.728	247.085	384.097	330.179
YCR020C-A	331.69	302.723	398.677	281.928	363.162	385.061
YCR020W-B	424.329	317.831	374.098	268.933	428.434	378.323
YCR021C	261.659	260.302	307.054	225.671	328.775	316.83
YCR023C	414.582	398.619	451.379	320.869	479.186	438.283
YCR024C	411.958	367.591	389.582	304.612	496.316	415.013
YCR024C-A	3707.02	2901.9	3177.69	2985.05	4786.5	4108.64
YCR026C	414.477	398.172	478.508	392.54	561.341	481.46
YCR027C	358.863	343.698	374.466	292.9	436.183	384.841
YCR028C	389.207	339.695	389.688	272.759	413.874	350.395
YCR028C-A	578.679	453.555	582.378	389.371	620.433	526.285
YCR030C	372.599	371.398	406.08	333.658	486.304	459.951
YCR031C	3266.32	2799.17	3477.87	2744.83	3953.31	3209.6
YCR032W	211.695	193.791	200.988	159.796	248.769	227.495
YCR033W	490.572	465.447	514.048	401.857	592.702	515.652
YCR034W	900.318	790.396	861.67	618.466	934.25	748.942
YCR035C	746.769	666.678	737.522	547.732	786.068	641.421
YCR036W	512.782	460.126	485.458	612.271	962.007	802.951
YCR037C	572.923	521.584	586.133	484.069	704.438	612.906
YCR038C	309.399	290.666	345.444	272.924	391.466	352.111
YCR039C	210.526	163.771	163.548	146.602	242.001	235.35
YCR040W	81.4269	73.5575	81.7258	72.9758	106.51	90.967
YCR042C	427.604	385.102	426.418	330.633	502.777	442.175
YCR044C	628.054	583.104	689.399	463.365	671.285	614.018
YCR045C	379.428	413.45	476.457	335.35	460.102	389.971
YCR046C	769.577	820.587	948.051	580.36	772.175	700.752
YCR047C	537.462	539.359	647.495	406.638	537.755	433.467
YCR048W	312.179	343.56	415.698	281.104	338.18	308.462
YCR052W	446.631	479.544	574.103	451.996	561.482	490.912
YCR053W	985.159	920.16	1070.41	815.666	1162.28	949.1
YCR054C	400.68	349.043	403.153	265.763	412.124	351.885
YCR057C	728.639	676.126	743.738	507.419	700.859	562.209
YCR059C	509.576	565.841	732.39	409.561	538.197	459.976
YCR060W	370.545	370.62	445.307	332.617	412.989	390.55
YCR063W	846.419	767.875	966.138	884.555	1275.66	1026.85
YCR065W	884.678	798.326	898.253	758.738	1123.74	977.541
YCR066W	311.356	277.988	306.824	231.994	368.505	316.418
YCR067C	394.56	378.329	443.089	338.829	492.66	440.299
YCR068W	304.98	328.285	406.795	275.321	353.341	323.745
YCR069W	449.072	443.984	523.826	410.92	570.072	507.408
YCR071C	595.814	557.859	591.624	458.027	714.69	624.742
YCR072C	661.877	636.481	717.278	479.537	668.89	518.32
YCR073C	306.62	284.063	325.188	287.958	411.121	354.031
YCR073W-A	299.824	324.568	403.312	304.891	395.989	376.054
YCR075C	270.256	267.179	335.9	229.186	316.719	298.119
YCR077C	504.367	486.872	561.529	456.825	627.67	558.432
YCR079W	509.55	516.328	608.23	434.99	592.733	536.3
YCR081W	237.371	210.226	234.903	186.049	278.254	250.722
YCR082W	632.503	548.716	609.398	502.672	746.72	653.648
YCR083W	422.774	418.64	480.083	350.084	484.543	431.276
YCR084C	707.446	722.957	844.403	657.405	874.681	757.938
YCR086W	616.533	602.785	634.745	432.948	593.039	519.765
YCR088W	487.876	486.86	541.24	446.625	612.221	543.419
YCR089W	247.599	254.323	304.214	240.608	326.699	294.261
YCR091W	170.553	161.542	178.732	174.246	251.71	254.662
YCR092C	284.705	264.901	289.022	226.025	341.671	299.665
YCR093W	670.861	593.721	644.069	513.471	789.261	678.459
YCR094W	265.179	235.145	269.346	224.713	337.462	305.463
YCR098C	269.046	256.82	316.389	460.093	666.343	602.69
YCR104W	103.74	102.573	129.23	83.5312	95.2764	104.505
YCR105W	227.814	211.851	243.757	181.654	266.577	244.804
YCR106W	333.847	303.458	333.381	271.146	423.618	358.365
YCR107W	363.288	358.743	414.823	374.629	558.674	466.305
YDL248W	195.04	172.952	189.834	170.457	277.138	258.719
YDL247W	206.94	206.502	212.043	216.275	321.869	294.715
YDL245C	163.657	166.32	180.861	195.395	286.317	266.828
YDL244W	169.888	162.653	209.625	163.882	213.366	210.188
YDL243C	175.782	166.852	211.657	146.669	198.869	170.522
YDL240W	324.564	286.157	314.929	283.391	421.772	367.208
YDL239C	165.282	135.092	142.327	110.531	185.832	162.65
YDL238C	212.617	218.028	265.095	251.925	368.35	331.936
YDL237W	304.266	262.477	301.521	249.017	375.82	347.741
YDL236W	557.085	523.951	633.504	498.669	701.345	601.57
YDL235C	637.491	526.24	602.7	599.358	922.387	793.046
YDL234C	305.154	269.054	300.225	293.402	423.075	380.203
YDL232W	783.333	721.996	859.836	560.574	930.426	708.392
YDL231C	452.1	414.022	443.814	364.618	545.981	465.861
YDL230W	254.651	263.504	316.698	263.424	331.564	309.562
YDL229W	3453.25	3301.96	3981.17	2899.4	3870.42	2974.03
YDL227C	645.437	558.912	684.66	247.721	368.002	316.153
YDL226C	562.497	504.524	578.253	430.934	613.751	522.061
YDL225W	387.766	342.227	389.156	299.788	470.941	382.723
YDL224C	564.416	543.072	566.164	514.879	742.651	661.165
YDL223C	211.881	215.69	243.143	220.338	298.205	273.373
YDL222C	196.902	203.53	220.436	299.343	410.776	433.525
YDL220C	247.8	246.363	263.12	242.918	335.567	294.336
YDL219W	362.251	256.025	307.829	198.849	323.084	278.674
YDL217C	520.85	480.426	559.407	429.994	603.212	498.628
YDL216C	258.004	241.669	284.388	220.576	311.156	292.38
YDL215C	441.111	374.542	411.887	375.123	582.177	511.475
YDL214C	170.784	171.274	198.255	171.64	249.812	224.286
YDL213C	536.744	449.224	513.233	446.065	639.958	496.078
YDL212W	615.391	566.948	677.439	540.268	787.702	671.256
YDL210W	168.042	167.887	188.689	137.504	192.412	167.655
YDL209C	364.025	337.151	366.588	280.84	431.168	366.125
YDL208W	1358.58	1245.16	1561.18	1072.78	1455.1	1186.43
YDL207W	393.473	347.008	376.4	345.252	500.56	436.036
YDL205C	631.357	557.326	623.997	480.313	720.608	598.606
YDL204W	355.033	343.737	385.071	436.252	614.174	635.078
YDL203C	321.778	291.067	333.018	267.458	385.33	338.026
YDL202W	564.344	504.157	590.116	407.414	583.362	507.045
YDL201W	576.041	529.265	584.92	370.302	566.878	462.464
YDL200C	351.964	319.845	323.094	261.27	394.09	362.51
YDL198C	745.29	717.203	794.148	553.306	794.399	675.986
YDL197C	351.397	347.947	403.261	320.451	421.41	419.124
YDL195W	604.357	581.927	632.32	524.672	766.199	682.788
YDL194W	154.286	149.178	172.387	144.866	209.513	199.933
YDL193W	531.688	442.237	498.769	355.336	541.501	476.365
YDL192W	1592.28	1468.21	1863.21	1383.32	1965.52	1707.55
YDL191W	2708.19	2128.71	2433	1958.7	3084.33	2501.36
YDL190C	421.585	380.522	413.46	316.655	490.466	440.906
YDL189W	434.429	399.763	480.777	331.098	468.573	416.143
YDL188C	385.258	374.357	455.721	337.535	472.228	431.348
YDL185W	791.649	750.296	844.997	713.399	1020.37	906.499
YDL184C	5317.45	4032.67	4608.82	3113.38	5078.93	4076.9
YDL183C	231.022	204.825	224.475	148.82	248.54	231.25
YDL182W	1267.35	1224.5	1583.26	1012.62	1318.54	1103.64
YDL181W	807.133	721.068	869.032	691.601	1046.89	915.531
YDL179W	797.275	699.058	817.021	724.37	1033.42	881.179
YDL178W	403.475	365.273	406.004	329.428	476.569	421.97
YDL176W	294.621	270.268	308.15	243.515	367.851	314.723
YDL175C	513.265	488.099	576.205	431.813	596.932	538.174
YDL174C	488.67	481.018	575.965	426.061	571.811	525.671
YDL173W	504.272	486.345	611.891	472.397	618.655	536.785
YDL171C	547.061	544.686	633.411	419.664	578.932	511.088
YDL170W	253.984	242.143	249.603	195.559	292.469	253.964
YDL169C	149.687	146.606	160.043	147.642	208.256	199.045
YDL168W	421.022	405.971	450.79	343.915	480.199	430.646
YDL167C	663.077	605.839	706.98	481.836	686.8	532.432
YDL166C	717.719	663.679	910.57	540.571	671.387	583.76
YDL165W	512.308	487.065	551.68	409.754	593.041	508.696
YDL164C	341.974	315.141	328.744	260.9	372.728	346.069
YDL161W	665.233	666.138	769.042	584.053	780.628	680.863
YDL160C	659.557	587.688	654.439	618.32	910.942	799.782
YDL159W	353.969	307.98	375.955	294.339	428.71	374.395
YDL155W	583.538	553.519	638.752	518.338	711.326	648.065
YDL154W	225.387	209.698	219.229	155.506	244.151	219.093
YDL153C	488.999	439.107	468.86	340.686	483.045	386.658
YDL150W	538.021	493.179	544.622	393.27	568.727	488.854
YDL149W	205.68	197.239	209.157	159.595	235.404	218.641
YDL148C	462.232	387.446	421.164	320.02	503.999	403.701
YDL147W	750.996	638.294	682.106	603.439	956.261	841.746
YDL146W	269.668	255.765	278.117	229.04	362.383	338.457
YDL145C	537.728	524.337	575.411	471.917	676.766	580.726
YDL143W	810.706	808.21	949.431	674.901	920.694	762.624
YDL142C	401.114	323.298	338.89	273.382	438.838	380.153
YDL141W	329.042	324.615	350.004	266.827	383.1	339.275
YDL140C	871.09	847.978	951.668	770.824	1084.9	930.714
YDL139C	226.794	241.066	306.362	215.011	274.746	266.67
YDL138W	499.803	502.199	595.406	464.965	640.894	556.619
YDL137W	1469.45	1391.29	1625.07	1128.82	1585.16	1358.78
YDL136W	2223.81	1778.68	1968.36	1629.58	2518.37	2031.06
YDL135C	620.376	494.969	515.183	364.13	630.383	535.528
YDL134C	631.488	624.134	744.232	596.471	802.032	725.494
YDL133C-A	4234.97	3137.44	3699.79	2908.04	4855.98	3867.43
YDL132W	386.507	350.254	383.639	303.3	455.432	405.931
YDL131W	891.85	852.347	1043.29	703.149	977.454	802.847
YDL130W-A	193.996	193.738	191.849	346.65	578.565	568.836
YDL130W	3537.59	3137.84	3621.38	2963.11	4360.5	3518.6
YDL128W	812.773	775.666	909.19	645.598	902.138	774.314
YDL127W	589.677	541.493	614.326	453.869	672.647	566.911
YDL126C	837.681	850.963	985.767	836.635	1143.86	1051.8
YDL125C	1131.96	1114.11	1450.92	1650.74	2181.06	2047.3
YDL124W	605.151	586.728	667.082	766.545	1105.34	1168.23
YDL123W	587.635	567.55	641.413	537.528	751.792	726.241
YDL122W	600.848	531.141	589.954	463.759	674.54	558.577
YDL120W	563.024	525.308	615.07	527.717	696.117	657.196
YDL117W	529.009	472.462	505.942	493.724	755.402	645.333
YDL116W	494.248	439.692	473.872	366.679	591.816	496.478
YDL115C	336.145	288.553	308.476	250.638	378.423	372.275
YDL113C	236.461	218.913	241.16	231.833	348.278	331.284
YDL112W	362.086	316.85	349.675	245.126	386.142	316.957
YDL111C	686.6	651.071	739.657	531.959	742.025	618.59
YDL110C	517.132	532.735	648.324	747.131	975.738	994.765
YDL108W	332.093	321.776	369.539	278.292	406.336	352.502
YDL107W	311.262	271.601	277.089	224.416	375.619	323.216
YDL106C	348.568	333.78	373.78	313.691	468.944	432.081
YDL105W	413.246	359.422	394.104	278.277	424.803	366.674
YDL104C	434.285	377.371	416.497	284.476	416.511	393.126
YDL103C	283.499	263.168	299.848	230.715	344.816	308.807
YDL102W	272.73	256.593	278.417	219.208	308.43	279.359
YDL101C	325.465	299.846	348.219	288.176	419.527	376.672
YDL100C	602.684	580.147	741.661	560.248	747.49	685.552
YDL099W	374.499	343.458	348.43	275.624	456.563	391.918
YDL098C	325.853	250.128	323.216	195.552	318.62	262.697
YDL097C	737.88	723.95	868.499	678.418	931.108	826.176
YDL095W	772.087	762.125	898.923	613.532	862.414	734.077
YDL093W	248.984	242.329	263.981	185.055	265.694	247.055
YDL092W	521.403	469.451	493.36	404.039	687.251	589.975
YDL091C	280.15	256.107	285.174	219.139	340.788	302.226
YDL090C	265.037	255.32	290.909	217.311	301.93	277.055
YDL089W	275.052	224.22	247.572	195.984	305.942	275.222
YDL088C	529.381	469.48	541.553	413.557	641.697	536.981
YDL087C	341.863	358.738	424.91	294.113	395.903	382.909
YDL085W	273.198	284.749	337.886	289.314	410.106	387.739
YDL084W	913.732	821.45	948.68	714.685	1028.98	882.545
YDL083C	2913.96	2450.35	2764.89	2227.46	3370.32	2689.85
YDL082W	2276	1958.61	2238.14	1603.45	2373.1	1919.53
YDL081C	3256.32	2626.51	2998.7	2367.29	3602.46	2938.15
YDL080C	474.685	452.513	507.873	357.81	507.827	453.234
YDL079C	300.751	265.522	322.176	253.484	374.342	361.483
YDL078C	332.789	339.16	389.751	334.972	465.182	440.404
YDL077C	225.049	194.794	204.303	172.71	261.616	244.098
YDL076C	389.56	347.996	414.828	354.036	516.55	505.34
YDL075W	3271.3	2492.28	2817.23	2258.39	3704.38	2899.52
YDL074C	636.953	525.496	570.373	438.288	676.46	570.973
YDL072C	633.689	567.394	658.871	780.784	1169.89	1078.51
YDL070W	1351.28	1121.57	1263.95	864.22	1338.7	1134.4
YDL069C	689.429	532.804	582.531	370.753	619.225	512.411
YDL067C	1025.18	893.085	1020.8	868.978	1224.72	1093.47
YDL066W	545.256	562.414	665.327	495.456	702.704	623.405
YDL065C	430.072	411.048	475.345	335.538	501.853	459.868
YDL064W	520.29	442.803	480.341	322.296	542.284	463.402
YDL063C	610.244	485.102	526.114	355.617	566.508	430.852
YDL061C	2887.15	2239.53	2525.29	2153.63	3467.04	2748.73
YDL060W	558.823	511.934	574.711	408.184	585.666	474.596
YDL059C	278.767	278.704	338.399	215.049	303.781	272.639
YDL058W	277.394	241.172	264.044	202.547	320.3	280.955
YDL056W	508.565	452.853	499.194	415.057	652.41	567.246
YDL055C	3858.21	3486.39	4576.15	4106.27	5794.32	4773.68
YDL054C	202.98	215.63	243.33	202.192	265.394	249.624
YDL053C	469.269	432.323	493.595	373.464	553.683	511.609
YDL052C	722.914	688.17	827.927	593.54	822.776	727.836
YDL051W	933.38	807.204	878.237	683.003	1011.5	804.043
YDL049C	423.455	411.774	518.252	359.884	494.578	402.728
YDL048C	316.44	307.434	386.233	293.377	399.691	381.271
YDL047W	713.116	714.068	766.423	629.48	884.238	765.818
YDL046W	849.822	827.358	941.37	751.706	1037.47	964.092
YDL045W-A	600.253	501.729	543.576	461.969	726.139	575.154
YDL045C	365.731	313.802	373.881	312.155	460.011	400.856
YDL044C	388.821	357.328	421.517	313.333	464.119	393.867
YDL043C	387.596	364.03	436.558	323.231	485.961	417.816
YDL042C	382.351	341.371	381.679	227.491	357.193	314.711
YDL040C	409.096	360.573	394.26	301.264	465.119	385.956
YDL039C	172.231	161.833	211.268	164.584	216.467	196.523
YDL037C	111.054	121.318	157.406	104.413	132.9	124.998
YDL036C	511.862	472.303	536.516	333.215	490.157	407.91
YDL035C	348.02	306.347	352.781	293.08	466.013	404.401
YDL033C	738.63	724.587	817.037	671.086	898.37	797.598
YDL031W	428.632	388.802	411.963	314.165	453.281	392.371
YDL030W	334.047	291.263	310.402	213.975	345.762	287.449
YDL029W	513.952	459.83	561.472	483.134	677.881	593.508
YDL028C	357.808	321.532	360.412	307.971	470.216	407.615
YDL025C	273.965	267.698	278.496	269.269	390.917	381.817
YDL024C	134.622	125.39	139.862	102.47	156.251	143.643
YDL022W	546.671	557.618	736.068	780.879	1077.08	1216.13
YDL021W	267.47	233.95	269.165	258.645	412.291	388.303
YDL020C	984.968	975.243	1148.48	953.895	1382.29	1289.08
YDL019C	266.434	256.186	282.734	217.216	313.698	317.052
YDL018C	348.407	318.803	373.788	316.692	433.267	412.147
YDL017W	291.52	279.34	301.838	239.349	357.958	315.424
YDL015C	596.184	496.518	529.853	438.474	725.784	598.711
YDL014W	2134.31	2048.28	2332.47	1727.9	2342.08	1783.93
YDL013W	406.472	397.329	455.759	372.04	502.218	446.481
YDL012C	768.501	738.657	883.417	619.502	884.085	760.593
YDL010W	468.909	399.762	438.952	350.384	567.497	490.752
YDL008W	863.48	813.443	1101.88	511.556	685.023	604.481
YDL007W	663.228	600.075	653.286	546.707	842.362	742.986
YDL006W	492.055	476.777	526.567	391.07	565.402	526.91
YDL005C	427.948	378.943	437.664	336.466	502.639	448.492
YDL004W	695.717	662.847	780.585	669.879	972.998	903.62
YDL003W	660.504	590.523	703.672	551.22	786.92	681.996
YDL002C	456.141	411.284	445.208	355.341	523.122	467.226
YDL001W	366.155	327.346	361.064	260.409	410.044	362.04
YDR001C	354.689	345.258	372.976	565.326	822.506	793.859
YDR002W	998.565	864.202	1045.68	906.097	1276.82	1094.59
YDR003W	491.705	458.188	561.822	453.179	604.7	609.124
YDR004W	498.47	447.438	499.295	366.339	571.342	492.885
YDR005C	451.387	371.09	416.135	341.108	540.63	478.252
YDR006C	568.547	521.211	580.551	500.669	738.624	609.813
YDR007W	614.475	587.411	672.804	574.391	834.845	751.945
YDR009W	200.418	201.125	223.776	165.083	241.373	230.604
YDR011W	968.94	952.663	1104.19	930.927	1330.43	1173.4
YDR012W	3451.71	3357.26	4130.07	2984.88	3903.43	3239.12
YDR013W	654.921	583.348	657.436	463.58	721.476	608.757
YDR014W	226.146	191.244	209.953	164.208	256.736	219.868
YDR014W-A	221.513	207.663	230.794	202.702	273.252	265.233
YDR016C	387.178	395.404	459.613	347.973	511.042	495.721
YDR017C	544.306	503.567	555.52	456.99	691.684	592.121
YDR019C	269.225	267.709	302.346	316.747	439.724	393.967
YDR021W	377.099	327.311	354.006	241.389	360.323	290.142
YDR022C	333.028	344.556	383.168	245.364	350.877	321.658
YDR023W	1105.08	918.932	1008.64	840.126	1279.76	1049.76
YDR025W	3345.43	2845	3408.78	2760.12	4032.81	3241.84
YDR026C	506.977	482.377	522.999	398.267	590.12	498.952
YDR027C	346.728	311.868	335.526	274.41	416.585	381.761
YDR028C	435.011	423.682	465.492	450.489	642.069	558.771
YDR030C	336.684	294.625	316.273	236.096	365.782	340.945
YDR031W	240.243	200.486	219.854	220.326	357.58	343.555
YDR032C	342.476	355.104	434.326	471.753	637.994	635.383
YDR033W	2881.15	2628.76	3252.47	2812.47	4033.8	3506.81
YDR034C	511.983	449.112	488.06	378.474	604.675	515.339
YDR035W	572.599	503.91	584.482	513.275	725.191	633.707
YDR036C	363.359	355.873	396.928	291.898	407.422	359.686
YDR037W	1406.25	1294.94	1452.87	1047.39	1506.39	1144.4
YDR038C	447.554	436.594	468.564	464.828	669.166	598.58
YDR039C	422.176	416.597	472.472	502.066	720.856	628.191
YDR040C	415.411	419.374	465.564	552.5	789.697	719.891
YDR041W	447.049	426.432	478.92	507.394	734.046	654.555
YDR043C	662.634	578.374	678.862	493.611	717.696	696.708
YDR044W	326.21	324.972	425.64	268.423	351.465	334.465
YDR045C	605.914	572.486	724.26	497.769	692.087	620.763
YDR046C	1007.02	969.074	1141.03	892.908	1260.59	1100.96
YDR047W	802.774	756.646	872.682	548.369	796.263	710.504
YDR050C	5291.01	4859.87	6281.1	4094.32	5553.59	4673.98
YDR051C	469.716	440.513	518.518	366.717	525.08	460.458
YDR052C	533.996	474.268	503.724	385.252	588.917	497.535
YDR054C	657.968	618.659	748.212	642.888	890.688	804.353
YDR055W	775.726	704.134	909.474	1405.97	1980.89	1692.4
YDR057W	272.297	245.459	274.235	221.658	331.904	303.664
YDR058C	190.742	178.858	186.222	151.977	242.148	215.728
YDR059C	259.954	226.201	213.281	244.216	375.103	370.316
YDR060W	735.667	633.819	698.423	486.544	741.695	579.894
YDR062W	592.709	544.197	606.609	443.495	645.963	553.183
YDR063W	656.005	596.915	630.246	497.255	774.628	672.965
YDR064W	5051.27	4101.79	4736.58	3836.51	6011.5	4739.9
YDR065W	515.101	440.351	453.703	324.069	519.041	423.59
YDR068W	333.815	300.945	337.078	281.081	415.204	372.025
YDR069C	263.47	222.715	242.619	199.906	313.727	278.546
YDR071C	600.904	507.995	562.28	481.794	795.249	674.386
YDR072C	748.342	703.792	809.966	678.762	983.014	891.011
YDR073W	906.375	850.003	1096.41	944.241	1272.81	1117.48
YDR074W	367.854	352.528	406.264	565.661	839.881	944.368
YDR075W	400.541	360.011	383.993	320.391	458.16	390.854
YDR076W	386.605	330.363	378.709	435.753	685.986	587.181
YDR077W	2447.75	2482.68	3627.51	7983.2	10646.2	9387.58
YDR078C	701.19	631.872	780.271	1339.67	2107.61	1813.17
YDR079W	357.813	275.776	274.107	229.686	392.046	354.195
YDR079C-A	522.688	434.104	504.784	366.637	562.591	522.675
YDR080W	210.388	183.115	194.855	158.661	256.652	217.589
YDR081C	347.867	305.458	334.804	259.704	401.478	342.766
YDR082W	345.305	314.86	354.939	273.116	401.456	345.833
YDR083W	485.638	395.273	410.9	314.17	486.185	397.852
YDR084C	323.139	316.502	329.451	275.889	404.868	381.535
YDR085C	214.25	198.948	226.711	309.778	458.836	458.865
YDR086C	968.218	775.943	915.102	853.6	1315.31	1194.75
YDR087C	706.533	644.526	720.236	488.752	728.563	586.15
YDR088C	302.646	263.382	300.066	228.434	349.517	315.363
YDR091C	826.617	724.783	819.474	595.187	894.828	719.788
YDR092W	652.004	607.886	753.382	442.396	609.031	558.039
YDR093W	403.676	386.973	438.155	294.856	424.048	371.002
YDR096W	294.449	283.368	302.708	265.448	404.996	377.836
YDR097C	274.025	261.672	281.233	214.776	318.984	280.687
YDR098C	523.69	457.188	494.604	368.208	578.751	478.928
YDR099W	714.967	634.744	701.562	657.614	1034.3	944.599
YDR100W	348.665	336.968	377.481	316.701	518.448	466.851
YDR101C	816.679	712.674	790.638	548.529	793.031	612.8
YDR103W	397.867	349.454	372.333	294.073	456.959	385.03
YDR104C	198.649	187.494	207.066	169.548	257.22	229.144
YDR105C	282.76	269.941	303.45	261.047	374.741	335.131
YDR106W	268.628	230.936	251.77	243.274	386.897	355.705
YDR107C	593.235	528.63	587.885	591.841	887.422	775.476
YDR108W	253.345	240.67	268.207	220.453	316.541	286.221
YDR110W	412.082	353.095	418.705	265.245	400.777	347.341
YDR113C	387.684	371.077	418.204	344.466	459.936	430.959
YDR116C	429.422	397.977	440.03	362.147	524.619	471.163
YDR117C	303.501	262.03	293.528	262.263	405.103	361.393
YDR118W	330.116	290.395	332.563	251.273	382.015	326.189
YDR120C	509.07	472.623	516.518	360.969	495.694	434.068
YDR121W	388.22	370.221	456.935	311.308	422.308	376.785
YDR122W	316.739	317.03	345.253	336.469	490.008	452.031
YDR123C	422.062	413.05	496.777	323.265	472.755	411.576
YDR125C	194.607	166.272	169.332	135.628	228.427	218.478
YDR126W	654.99	605.779	757.962	507.493	666.69	586.98
YDR127W	604.145	606.412	696.837	506.681	711.847	607.584
YDR128W	295.651	268.194	286.812	212.128	337.573	287.288
YDR129C	513.799	488.75	553.632	482.61	711.814	662.277
YDR130C	405.675	373.536	440.629	379.928	542.602	471.12
YDR135C	417.639	394.98	441.446	395.274	596.738	518.656
YDR137W	281.84	257.279	269.615	234.955	355.105	313.359
YDR138W	385.942	316.563	338.38	262.942	426.371	364.338
YDR139C	473.133	437.251	498.189	385.009	549.902	507.246
YDR140W	498.593	474.349	492.241	361.204	561.711	474.634
YDR141C	312.944	276.398	296.204	246.849	395.814	340.031
YDR142C	322.438	293.501	324.566	252.675	364.286	326.646
YDR143C	608.614	589.97	684.45	493.028	657.885	567.228
YDR144C	594.165	579.445	666.137	417.736	568.953	499.295
YDR145W	496.799	472.658	521.864	443.335	622.444	549.158
YDR146C	418.777	393.84	425.23	444.243	685.762	624.672
YDR147W	370.448	321.411	344.337	279.457	447.376	386.714
YDR148C	406.095	402.932	452.966	389.974	571.614	540.115
YDR150W	297.732	275.167	292.926	256.712	387.909	341.692
YDR151C	736.08	654.803	760.653	571.777	821.663	741.026
YDR152W	770.843	714.67	825.957	661.026	903.957	757.227
YDR153C	722.438	671.491	784.226	612.031	871.995	746.736
YDR155C	2516.85	2547.55	3252.61	1749.32	2331.31	2230.06
YDR156W	1422.63	1382.44	1604.13	1045.3	1502.11	1249.64
YDR158W	902.011	896.701	1071.67	680.688	914.52	793.593
YDR159W	292.151	256.667	271.1	219.89	343.639	304.562
YDR160W	250.375	238.374	251.787	211.923	307.029	283.616
YDR162C	418.143	389.505	477.45	381.713	530.145	457.016
YDR163W	429.598	400.651	426.471	334.171	539.332	472.998
YDR164C	276.726	242.659	263.065	213.889	324.955	292.154
YDR165W	686.77	550.49	597.274	419.847	652.616	530.07
YDR166C	326.182	268.332	282.248	224.096	364.307	311.153
YDR167W	510.365	490.407	613.133	453.982	629.932	545.592
YDR168W	389.814	332.612	345.073	296.801	444.783	415.192
YDR169C	330.524	331.292	351.902	313.07	455.107	390.259
YDR170C	345.186	327.619	361.834	293.989	433.732	378.836
YDR171W	243.071	272.18	350.644	385.186	502.117	664.109
YDR172W	1026.27	979.689	1145.16	898.253	1220.26	1033.57
YDR173C	531.413	454.66	516.206	364.557	580.561	486.319
YDR174W	1596.5	1477.34	1699.38	1346.74	1938.38	1562.34
YDR175C	460.175	413.586	466.674	359.084	540.164	449.275
YDR176W	453.712	389.42	423.993	307.777	461.689	402.804
YDR177W	684.776	620.873	743.193	592.537	799.827	729.999
YDR178W	365.553	341.898	394.604	365.567	552.644	526.749
YDR179C	229.957	183.152	197.591	151.93	253.832	237.657
YDR180W	237.097	203.39	215.854	155.249	253.89	221.691
YDR181C	282.351	250.137	266.246	247.655	375.209	317.927
YDR182W	332.971	294.329	330.174	286.681	446.518	402.359
YDR183W	354.851	309.804	368.257	255.979	394.77	354.6
YDR184C	559.216	449.423	514.004	341.273	519.305	417.761
YDR185C	568.784	532.861	642.484	311.228	433.31	384.705
YDR186C	566.564	562.685	641.081	508.397	724.912	625.214
YDR188W	945.905	1006.23	1239.71	907.13	1167.19	970.79
YDR189W	449.362	390.412	432.08	321.838	490.409	419.347
YDR190C	737.755	687.737	815.286	679.311	938.372	790.848
YDR191W	261.314	237.467	259.908	240.27	343.678	312.069
YDR192C	263.889	271.484	326.347	250.627	332.34	294.557
YDR194C	632.936	531.52	560.991	439.515	692.682	583.878
YDR195W	527.222	445.504	492.856	363.504	557.452	471.639
YDR196C	320.676	295.485	325.437	309.032	427.578	408.983
YDR197W	329.758	276.1	303.575	246.232	397.811	365.466
YDR198C	338.17	292.342	338.502	223.26	352.222	277.136
YDR200C	247.25	221.477	238.162	201.669	303.253	280.459
YDR201W	271.526	281.829	323.49	258.574	398.752	357.856
YDR202C	262.598	251.497	271.973	221.273	344.83	316.66
YDR204W	288.525	271.354	319.587	230.908	334.055	296.6
YDR205W	314.115	308.074	347.45	252.792	375.53	339.404
YDR206W	425.421	385.593	412.414	317.738	476.196	395.18
YDR207C	259.143	270.473	312.575	222.884	294.313	276.245
YDR208W	592.648	537.272	602.959	529.651	795.856	679.875
YDR211W	577.386	519.064	583.831	454.914	675.417	564.071
YDR212W	645.15	605.256	682.723	530.367	732.358	625.218
YDR213W	409.107	393.209	476.325	335.716	474.408	422.303
YDR214W	852.835	885.159	1061.43	881.46	1221.01	1194.14
YDR216W	186.072	177.25	192.201	335.109	510.911	447.208
YDR217C	265.962	245.269	262.425	202.476	306.985	267.296
YDR218C	132.468	113.733	132.05	100.675	164.137	156.432
YDR219C	355.067	306.974	337.665	302.658	491.011	439.225
YDR221W	480.328	440.283	504.908	341.641	509.807	461.126
YDR223W	256.901	245.989	301.693	271.983	410.803	360.749
YDR224C	4506.97	3534.79	4537.6	2381.17	3540.02	3005.56
YDR225W	4936.43	4004.58	5087.11	2662.74	3997.27	3433.28
YDR226W	1202.64	1114.17	1308.83	772.53	1141.75	941.558
YDR227W	273.458	240.225	251.099	206.116	315.346	279.309
YDR228C	471.409	414.117	434.171	305.537	472.982	417.137
YDR229W	385.409	370.808	441.946	331.552	478.68	448.338
YDR231C	402.658	372.027	428.857	391.696	568.529	498.848
YDR232W	762.304	780.913	902.4	641.814	843.538	723.702
YDR233C	1984.07	1677.54	1952.76	1464.96	2154.64	1814.99
YDR234W	599.974	580.4	657.252	450.479	622.315	523.343
YDR235W	356.456	294.378	301.705	222.432	347.714	310.233
YDR236C	426.759	409.741	444.924	330.803	472.419	423.994
YDR237W	432.738	390.74	424.241	315.14	458.59	421.484
YDR238C	608.748	577.634	664.958	506.827	732.167	628.683
YDR239C	283.759	265.106	294.352	214.261	307.727	278.14
YDR240C	334.767	291.653	343.467	237.414	348.23	298.908
YDR242W	378.747	374.447	404.618	374.715	547.072	487.596
YDR243C	318.612	286.963	325.156	257.912	389.419	354.969
YDR244W	283.04	269.996	304.436	238.073	338.876	323.785
YDR245W	668.252	624.239	689.158	551.755	823.831	689.778
YDR246W	522.012	503.445	560.457	494.653	710.703	641.008
YDR247W	304.831	291.484	332.381	390.302	582.035	555.296
YDR251W	357.665	334.889	363.539	355.28	549.745	503.67
YDR252W	355.97	282.366	327.833	250.444	354.857	317.262
YDR253C	390.519	358.007	421.471	293.368	461.258	371.913
YDR254W	334.846	279.26	298.669	273.52	438.033	399.914
YDR255C	309.748	290.035	315.103	307.822	458.492	412.914
YDR256C	488.861	475.304	527.105	353.016	509.444	429.509
YDR257C	433.084	362.828	399.441	295.626	464.447	402.602
YDR258C	322.917	327.654	377.877	393.663	596.277	663.674
YDR259C	244.491	212.063	239.278	207.374	323.323	279.824
YDR260C	587.823	547.164	683.143	620.107	815.431	757.884
YDR261C	481.344	451.622	512.111	435.971	636.316	584.469
YDR263C	235.41	206.773	212.702	165.437	270.817	249.993
YDR264C	461.292	451.347	511.92	413.958	590.185	513.634
YDR265W	404.691	355.895	398.952	326.197	475.323	407.227
YDR266C	485.669	430.298	470.155	373.833	548.821	474.411
YDR267C	399.368	400.688	487.127	357.912	482.066	408.218
YDR268W	574.152	517.173	587.696	317.805	481.457	414.338
YDR270W	378.108	366.5	408.738	243.33	351.671	318.22
YDR272W	369.79	334.678	368.587	315.978	500.422	455.587
YDR273W	251.301	253.136	271.39	215.948	291.063	270.496
YDR275W	745.731	710.965	870.788	529.475	750.185	628.072
YDR276C	1640.76	1411.74	1651.78	1516.72	2290.66	2118.6
YDR277C	328.078	333.18	382.965	479.116	709.037	717.186
YDR279W	366.119	319.673	333.965	228.193	362.249	314.547
YDR280W	785.22	716.258	801.111	566.814	801.69	672.544
YDR281C	739.945	676.767	770.118	386.643	552.298	466.046
YDR283C	287.506	254.099	274.464	220.032	345.863	296.42
YDR284C	549.003	527.033	639.483	431.776	614.309	549.136
YDR285W	190.581	158.977	175.702	119.288	198.918	177.825
YDR287W	243.582	231.136	264.923	233.019	331.136	302.034
YDR288W	395.479	324.816	367.517	271.43	436.225	389.678
YDR289C	356.098	325.92	367.523	279.566	427.597	363.673
YDR292C	387.092	353.993	376.629	294.609	451.267	377.93
YDR293C	456.53	437.583	484.769	511.987	745.747	681.817
YDR294C	405.702	417.611	467.102	429.531	601.464	532.562
YDR295C	332.762	298.077	328.861	232.631	353.678	313.512
YDR296W	612.852	603.76	751.909	587.614	753.696	703.882
YDR297W	430.505	441.897	548.303	463.753	595.703	543.679
YDR298C	716.295	694.055	801.743	720.64	1025.06	900.421
YDR299W	719.81	618.397	673.066	455.533	685.066	525.705
YDR300C	602.742	553.193	606.449	410.007	557.051	475.975
YDR301W	304.904	288.548	321.275	249.623	371.265	328.188
YDR302W	333.839	265.417	322.519	272.275	434.834	379.989
YDR303C	357.657	310.421	330.389	263.086	416.376	351.043
YDR304C	516.533	508.29	581.458	463.807	653.985	599.134
YDR305C	509.343	491.253	537.119	374.101	584.98	516.509
YDR308C	469.299	447.533	513.203	420.89	630.419	526.281
YDR309C	883.187	836.049	1013.13	941.149	1281.94	1140.83
YDR310C	499.057	453.877	508.779	380.128	539.048	461.523
YDR311W	361.347	348.156	392.129	323.771	483.034	411.673
YDR312W	385.776	339.318	364.335	296.292	458.625	373.621
YDR313C	413.25	399.159	455.47	362.478	532.181	479.053
YDR314C	326.684	288.672	313.422	274.66	417.262	365.196
YDR315C	290.831	244.967	284.113	243.801	362.06	314.283
YDR316W	306.927	254.269	280.936	247.822	400.187	344.547
YDR317W	239.867	202.61	225.62	165.217	266.82	237.445
YDR318W	449.268	375.13	405.671	310.113	503.263	439.106
YDR320C	342.298	313.933	348.78	291.41	431.697	361.738
YDR320C-A	581.537	506.018	549.894	449.85	705.293	625.992
YDR321W	549.399	492.669	536.034	372.225	553.428	459.892
YDR322W	394.834	368.373	418.047	330.254	514.12	426.93
YDR322C-A	646.98	598.595	683.097	576.663	828.474	731.676
YDR323C	273.548	249.894	284.054	216.32	318.413	294.495
YDR324C	647.221	569.205	617.304	428.549	646.666	501.563
YDR325W	301.827	276.585	309.673	248.704	360.866	320.549
YDR326C	364.139	322.937	360.143	306.577	452.32	398.954
YDR328C	431.705	474.036	595.171	458.865	575.598	543.116
YDR329C	281.535	283.487	310.268	255.569	357.173	326.244
YDR330W	253.153	258.387	306.879	229.342	315.427	281.731
YDR331W	506.551	434.777	517.499	365.24	549.291	497.678
YDR332W	294.696	269.415	301.045	209.861	326.948	290.351
YDR334W	448.595	444.985	476.059	343.702	504.049	446.518
YDR335W	379.106	339.782	362.163	310.413	483.085	424.991
YDR337W	417.18	371.148	420.817	315.974	485.65	435.004
YDR339C	714.472	603.557	715.076	599.925	862.41	721.174
YDR341C	711.02	614.728	671.49	467.147	702.297	617.043
YDR342C	362.62	342.522	423.221	1104.31	1666.44	1736.48
YDR343C	317.337	289.503	364.63	952.896	1418.93	1521.12
YDR345C	1511.24	1485.53	1951.79	551.24	772.483	683.233
YDR346C	802.538	716.449	814.982	610.351	903.096	736.794
YDR347W	577.556	537.855	586.846	425.544	640.458	563.412
YDR349C	534.224	522.72	611.593	515.995	682.355	603.201
YDR350C	334.045	290.335	298.426	300.972	465.847	418.004
YDR351W	451.112	387.721	423.929	471.517	690.828	591.312
YDR353W	995.708	987.399	1164.23	859.303	1228.86	1073.71
YDR354W	482.642	472.99	545.308	418.424	548.92	498.108
YDR356W	268.576	224.653	253.525	204.504	321.207	284.332
YDR358W	242.073	236.768	254.042	233.569	356.672	354.586
YDR359C	445.014	432.275	470.547	403.396	590.928	507.548
YDR361C	665.733	558.193	636.285	404.805	585.268	484.907
YDR362C	304.767	287.571	312.464	248.781	370.469	318.281
YDR363W	297.816	254.088	283.717	229.956	355.748	313.084
YDR363W-A	827.653	685.463	792.498	602.847	924.444	762.671
YDR364C	453.439	399.3	455.947	340.342	500.625	418.297
YDR365C	539.413	475.278	513.973	384.241	572.816	468.868
YDR367W	374.799	310.601	346.543	257.066	372.266	342.998
YDR368W	380.433	354.885	396.75	267.797	373.619	347.842
YDR369C	219.216	194.588	212.579	142.946	228.64	210.757
YDR372C	475.762	414.399	442.257	374.357	575.689	489.684
YDR373W	330.874	278.979	312.82	289.241	459.954	391.246
YDR375C	340.853	331.834	366.675	308.282	447.346	398.019
YDR376W	309.047	290.964	315.387	251.436	380.986	342.64
YDR377W	1006.67	846.206	995.231	746.781	1134.4	1016.29
YDR378C	970.069	916.517	1064	701.836	1069.09	877.02
YDR379W	254.369	249.661	271.559	256.77	384.123	354.178
YDR379C-A	345.466	262.257	277.6	324.468	571.67	517.65
YDR380W	596.037	537.995	654.87	625.32	923.682	818.308
YDR381W	2884.19	2452.9	2801.52	2296.1	3507.15	3047.42
YDR381C-A	957.999	855.765	941.047	666.621	1113.82	912.728
YDR382W	3898	3474.46	4211.14	3353.98	4834.95	3930.14
YDR383C	1161.66	899.947	1025.99	751.99	1272.26	1023.83
YDR384C	570.815	534.816	637.477	425.296	576.158	483.57
YDR385W	2660.07	2622.12	3126.24	2227.77	3009.16	2467.78
YDR386W	283.183	264.382	261.533	213.668	326.938	290.876
YDR388W	396.15	419.314	487.761	431.277	579.941	535.311
YDR389W	463.911	443.515	494.411	387.597	563.697	472.033
YDR390C	358.66	335.46	370.327	294.764	423.86	373.244
YDR392W	333.733	325.319	376.617	280.559	414.092	363.647
YDR393W	607.327	542.728	607.931	460.086	721.057	581.483
YDR394W	749.225	727.937	844.482	654.88	892.047	791.973
YDR395W	652.005	583.72	624.467	440.461	634.639	538.199
YDR397C	711.988	633.981	707.822	478.937	673.565	569.814
YDR398W	800.104	764.276	837.834	558.231	768.045	594.77
YDR399W	1706.28	1507.46	1753.2	1388.03	1844.94	1594.55
YDR400W	387.803	347.633	396.733	296.471	443.121	381.662
YDR402C	164.105	141.941	146.103	110.475	169.889	164.89
YDR403W	161.556	144.729	156.444	105.075	168.878	158.683
YDR404C	626.637	585.793	645.255	563.221	864.268	789.027
YDR405W	549.676	560.219	698.881	494.582	637.109	625.24
YDR406W	204.992	205.625	226.034	182.074	269.973	241.333
YDR407C	315.307	283.798	305.554	254.918	392.831	343.978
YDR408C	688.733	686.487	836.376	652.301	889.779	750.662
YDR409W	371.792	353.042	386.027	268.908	393.41	348.05
YDR410C	655.004	535.258	625.131	434.688	696.851	587.107
YDR411C	527.789	495.443	570.712	489.01	700.714	603.83
YDR412W	520.33	442.103	508.609	345.697	515.976	440.038
YDR414C	392.752	347.414	397.738	265.698	397.582	355.751
YDR416W	526.062	473.014	516.225	358.36	541.608	462.957
YDR418W	3470.55	3035.53	3805.51	3003.55	4329.63	3542.52
YDR419W	236.151	221.273	235.053	179.291	269.172	256.663
YDR420W	427.561	426.636	485.645	485.088	678.414	569.396
YDR421W	227.628	223.782	238.089	208.218	306.611	275.217
YDR422C	397.021	381.057	427.142	322.556	455.068	398.903
YDR423C	490.375	463.819	548.562	401.635	557.958	506.943
YDR424C	743.966	668.128	799.351	591.835	916.994	790.407
YDR425W	278.122	236.159	257.934	214.059	319.531	280.987
YDR427W	678.782	553.851	588.624	480.164	808.947	664.455
YDR428C	649.869	571.12	639.849	403.247	597.315	500.231
YDR429C	1131.95	1021.03	1181.05	906.583	1229.83	1001.54
YDR430C	366.286	339.969	357.618	303.645	457.046	416.3
YDR432W	1747.31	1614.21	1856.56	1590.41	2241.04	1895.75
YDR434W	314.104	291.163	345.358	292.728	430.828	377.613
YDR435C	235.354	246.032	273.277	228.176	333.662	301.481
YDR436W	271.991	272.443	314.666	244.115	348.595	323.441
YDR437W	375.089	358.841	463.866	346.703	444.317	412.068
YDR438W	407.486	394.223	426.385	348.826	499.057	458.166
YDR439W	358.686	325.165	389.516	287.486	404.022	349.558
YDR440W	331.6	305.194	349.827	233.577	336.122	293.683
YDR441C	1003.23	881.253	975.238	535.383	794.339	702.107
YDR443C	217.901	202.674	230.063	176.054	257.996	241.505
YDR446W	443.209	326.648	307.548	226.796	398.207	301.186
YDR447C	2921.99	2373.74	2707.97	2320.39	3481.5	2791.85
YDR448W	552.189	518.164	586.441	411.625	615.676	517.555
YDR449C	723.829	585.919	650.787	422.162	693.351	527.242
YDR450W	2683.52	2305.76	2587.81	2120.93	3226.72	2619.28
YDR451C	807.259	741.401	888.006	814.148	1138.28	1037.91
YDR452W	482.982	436.541	487.144	296.379	475.918	420.48
YDR453C	313.61	302.723	331.867	182.802	277.796	256.19
YDR454C	592.67	528.477	601.271	384.183	599.463	500.556
YDR456W	375.27	343.087	369.379	273.625	423.556	362.415
YDR457W	349.478	321.104	348.201	279.824	427.371	370.647
YDR458C	353.537	309.503	323.356	288.981	431.187	393.743
YDR459C	370.966	359.993	406.778	329.467	465.601	416.016
YDR460W	554.198	508.47	620.604	515.822	770.786	609.847
YDR461W	1312.51	1012.05	1260.78	1150.74	1758.88	1450.77
YDR462W	604.113	598.453	696.653	570.867	799.617	707.425
YDR463W	540.288	516.889	583.961	465.099	650.733	565.044
YDR464W	301.786	276.661	297.379	240.819	347.891	300.208
YDR465C	485.788	442.053	504.64	333.873	448.331	354.817
YDR466W	381.553	349.377	380.633	295.178	434.247	397.68
YDR468C	570.494	540.319	641.885	487.95	700.819	611.824
YDR469W	401.329	370.089	450.61	342.829	511.851	426.078
YDR470C	341.939	315.375	354.558	265.792	414.933	357.177
YDR471W	2952.09	2542.58	3015.68	2296.99	3453.83	2824.71
YDR472W	678.96	610.5	705.393	457.67	696.635	597.389
YDR473C	293.298	246.948	274.462	200.531	298.991	268.089
YDR475C	375.388	381.273	441.534	288.505	401.815	373.737
YDR477W	421.315	410.858	451.371	380.604	513.834	477.655
YDR478W	428.069	362.904	411.978	295.963	458.794	413.69
YDR479C	511.172	469.126	508.373	385.291	584.951	528.873
YDR480W	360.66	356.674	400.15	306.991	445.235	392.077
YDR481C	520.741	537.324	649.893	617.711	815.075	716.298
YDR482C	320.511	312.566	384.516	267.624	369.719	314.44
YDR483W	585.679	541.287	598.264	569.06	838.776	733.354
YDR484W	270.683	215.893	221.271	181.18	292.622	252.691
YDR485C	317.593	287.757	317.026	272.665	399.059	355.881
YDR486C	448.693	413.867	487.056	421.77	598.248	544.843
YDR487C	535.947	569.351	684.017	578.788	753.99	661.898
YDR488C	210.876	233.37	278.618	189.715	246.668	223.846
YDR489W	519.103	446.45	552.411	392.743	545.061	481.057
YDR490C	311.305	307.65	345.236	241.58	346.052	327.743
YDR492W	595.639	540.998	656.335	420.623	615.585	506.949
YDR493W	509.488	490.757	602.707	452.309	629.553	545.56
YDR494W	428.846	367.49	393.095	340.782	509.433	443.682
YDR495C	243.954	199.789	212.47	162.806	267.555	236.095
YDR496C	787.961	651.713	707.931	492.541	768.326	592.311
YDR497C	962.089	954.302	1153.02	905.988	1227.46	1074.26
YDR498C	373.144	368.828	389.655	365.002	533.051	490.088
YDR499W	461.928	396.938	438.346	320.915	504.569	425.993
YDR500C	2844.35	2417.13	2788.28	2395.83	3608.35	2881.31
YDR501W	338.46	314.993	339.991	233.441	362.267	315.838
YDR502C	1160.67	1179.51	1496.69	1087.37	1427.83	1263.15
YDR503C	425.904	428.17	513.156	417.108	586.561	502.351
YDR504C	301.081	192.642	183.439	143.286	288.808	232.76
YDR505C	360.335	322.984	367.939	312.832	457.705	424.666
YDR507C	450.558	408.036	449.764	387.964	584.816	494.62
YDR508C	1668.23	1529.59	1753.53	1162.32	1691.48	1397.92
YDR510W	850.738	808.411	1002.49	728.619	1039.18	886.111
YDR511W	600.46	565.481	656.964	514.412	762.509	690.919
YDR512C	381.721	355.605	367.216	318.333	502.498	440.082
YDR513W	449.821	414.801	452.939	448.716	647.536	661.564
YDR515W	279.045	222.832	246.907	174.579	281.649	244.14
YDR516C	268.912	270.995	328.501	308.758	409.495	439.493
YDR517W	505.298	517.843	647.25	437.94	561.315	525.214
YDR518W	271.851	253.289	267.519	210.651	321.789	273.489
YDR519W	536.283	511.515	544.473	447.29	642.29	549.512
YDR522C	169.785	145.278	149.322	130.662	210.58	187.181
YDR523C	129.064	128.544	135.183	93.6784	141.051	140.583
YDR524C	588.855	502.462	575.956	456.684	704.268	571.917
YDR525W-A	689.799	601.39	660.628	639.838	1026.82	924.377
YDR527W	826.257	720.228	792.164	521.828	768.001	603.446
YDR528W	736.285	643.078	728.966	501.357	743.76	641.726
YDR529C	1026.23	905.352	1076.58	879.133	1288.43	1202.17
YDR530C	429.474	432.749	535.172	420.099	571.392	531.005
YDR531W	386.216	329.649	362.82	280.138	426.86	372.324
YDR532C	272.851	224.502	233.685	203.671	328.899	295.973
YDR533C	378.793	324.039	357.156	235.63	326.964	327.932
YDR534C	137.989	155.416	183.68	135.886	176.054	169.907
YDR536W	230.554	227.229	255.514	235.885	340.365	310.374
YDR538W	443.984	401.696	475.981	350.012	488.637	438.21
YDR539W	335.268	312.602	344.542	253.862	360.533	321.077
YDR540C	168.253	129.827	153.312	101.238	177.13	140.1
YDR542W	93.8629	122.239	121.368	89.6753	135.62	135.973
YDR545W	422.807	435.299	503.605	357.513	501.72	453.013
YEL072W	396.159	350.634	423.501	355.637	570.045	503.329
YEL071W	1113.98	1048.97	1154.13	889.065	1369.35	1126.77
YEL069C	198.864	203.208	224.81	181.029	263.023	247.345
YEL066W	304.252	314.162	370.419	294.251	375.752	342.313
YEL065W	449.133	454.706	551.836	422.665	633.49	510.221
YEL064C	273.871	251.978	277.151	224.568	345.781	292.694
YEL063C	751.841	709.405	769.415	712.027	984.562	839.695
YEL062W	285.731	258.974	284.525	234.76	360.629	320.233
YEL061C	343.994	302.085	328.963	269.489	409.227	365.978
YEL060C	528.232	544.916	643.007	693.112	927.409	878.738
YEL059C-A	322.539	331.671	401.386	440.444	628.134	555.518
YEL058W	519.13	531.779	627.825	628.364	828.241	704.384
YEL056W	590.821	550.224	622.983	406.186	592.154	510.255
YEL055C	608.186	508.067	541.648	355.871	567.735	469.078
YEL054C	3422.82	2939.72	3580.16	2901.04	4101.06	3268.23
YEL053C	303.746	261.027	302.988	222.339	329.923	293.289
YEL052W	291.799	282.557	323.802	252.158	331.227	319.069
YEL051W	797.091	681.983	811.306	540.329	770.024	690.784
YEL050C	464.175	471.858	537.598	401.233	569.081	497.875
YEL049W	324.042	344.418	395.919	274.263	372.648	304.107
YEL048C	428.15	315.727	382.425	248.293	393.537	315.479
YEL047C	406.949	401.942	487.312	304.395	416.004	382.048
YEL046C	4100.24	4072.58	5063.44	2898.18	3730.69	3018.58
YEL044W	777.733	810.757	1046.53	498.689	635.29	530.39
YEL043W	412.365	400.919	458.363	318.109	456.056	402.175
YEL042W	595.563	562.07	645.309	459.801	633.116	534.549
YEL041W	222.475	215.875	242.101	223.008	331.158	314.579
YEL040W	2585.32	2378.67	3076.61	2220.27	3046.29	2425.53
YEL039C	1008.52	894.998	1058.42	871.487	1245.86	1139.92
YEL038W	347.577	352.049	393.108	276.452	390.805	339.515
YEL037C	692.675	689.451	781.543	542.519	727.167	628.072
YEL036C	661.199	666.762	785.295	678.468	895.859	772.311
YEL034W	9547.3	8730.03	12000.8	7834.08	10477.1	9082.24
YEL032W	506.14	508.808	606.755	467.28	642.138	543.556
YEL031W	640.06	616.94	686.557	547.757	778.492	665.562
YEL030W	273.599	259.584	294.266	187.637	264.917	248.762
YEL029C	361.258	309.439	330.995	235.402	380.27	339.764
YEL027W	1423.12	1285.15	1644.51	1298.97	1773.59	1605.24
YEL026W	2764.89	2391.19	2878.68	2173.19	3158.66	2452.25
YEL024W	1092.6	1038.62	1244.91	1235.34	1699.49	1527.32
YEL022W	335.632	291.423	322.961	246.184	371.347	333.925
YEL021W	613.066	565.946	695.34	521.807	701.71	621.713
YEL020W-A	1639.8	1505.43	1822.38	1427.95	1919.72	1671.54
YEL019C	224.72	205.852	239.504	180.216	236.198	215.54
YEL018W	855.077	783.18	963.163	598.085	871.825	732.204
YEL017C-A	2666.91	2080.32	2412.08	1653.02	2603.12	2141.22
YEL017W	432.266	428.987	498.884	446.568	654.781	579.146
YEL016C	352.875	340.742	398.045	357.778	513.376	455.607
YEL015W	554.408	520.958	575.292	0.254454	0.585228	0.550791
YEL013W	455.974	417.909	454.137	387.783	582.539	521.832
YEL012W	223.357	217.72	261.563	201.023	312.439	296.631
YEL011W	328.737	328.311	398.725	386.101	558.71	590.593
YEL009C	5055.8	4558.87	5340.31	4552.96	6574.76	5338.44
YEL006W	603.691	533.453	593.725	408.227	639.23	537.33
YEL005C	268.627	258.197	283.858	209.709	312.858	301.697
YEL004W	342.441	288.741	305.734	211.018	363.433	332.781
YEL003W	528.407	421.055	488.992	341.345	613.298	479.449
YEL002C	524.208	471.91	522.575	417.024	629.866	556.084
YEL001C	475.01	432.157	501.393	416.642	620.974	538.673
YER001W	713.014	622.976	711.64	579.263	869.596	764.474
YER002W	842.361	721.488	880.981	641.268	911.01	733.047
YER003C	457.922	416.395	465.926	364.513	554.932	500.336
YER004W	581.108	618.923	753.857	546.656	698.471	646.133
YER005W	515.336	503.634	554.207	384.399	565.29	490.07
YER006W	831.998	763.774	881.523	621.636	873.06	679.552
YER007W	319.695	263.479	283.243	196.148	317.78	254.219
YER007C-A	604.239	508.809	629.05	436.809	616.111	553.324
YER008C	369.985	329.983	363.1	294.203	461.564	398.621
YER009W	884.377	790.22	999.486	772.268	1113.23	904.637
YER010C	430.291	382.192	446.705	345.365	550.486	448.284
YER011W	148.533	154.733	189.637	137.026	192.353	192.143
YER012W	1263.8	1125.96	1377.06	885.611	1254.11	1094.86
YER013W	263.351	242.721	272.154	214.304	321.578	287.134
YER014W	198.265	198.095	224.141	166.994	241.861	223.389
YER014C-A	245.483	235.296	260.18	181.982	251.677	230.747
YER015W	239.31	209.073	223.262	151.046	231.392	221.122
YER016W	429.587	387.472	456.894	359.605	511.377	469.502
YER017C	423.38	426.316	485.561	399.358	570.551	498.236
YER018C	589.634	629.21	802.15	531.978	681.282	593.257
YER019W	738.789	766.523	974.887	612.493	803.46	701.538
YER019C-A	1630.88	1530.36	1923.96	1289.45	1839.74	1556.93
YER020W	356.217	392.211	471.735	387.132	495.695	461.961
YER021W	766.97	672.341	734.423	583.515	927.152	802.905
YER022W	311.495	280.544	306.335	235.726	367.187	318.283
YER023W	523.061	547.09	692.615	553.001	687.65	630.36
YER024W	406.393	381.511	440.186	275.93	396.403	347.985
YER025W	1076.26	1013.16	1134.1	859.256	1179.82	993.652
YER026C	665.008	588.506	675.882	630.008	943.609	816.29
YER027C	355.212	345.448	428.544	331.324	436.562	408.407
YER028C	341.465	335.918	380.451	180.27	255.894	240.884
YER029C	478.843	417.074	490.906	378.928	564.201	490.028
YER030W	471.865	462.107	541.774	428.557	589.785	513.014
YER031C	533.758	518.248	642.567	522.681	722.69	627.675
YER032W	328.683	298.182	328.854	311.246	453.974	409.417
YER033C	190.274	190.946	215.394	201.201	289.143	270.13
YER035W	1050.32	964.662	1202.46	878.118	1280.06	1129.75
YER036C	1276.22	1169.78	1359.5	900.517	1294.49	1053.87
YER037W	451.723	409.337	497.848	513.527	781.982	762.753
YER038C	267.889	228.369	248.526	201.103	332.504	294.875
YER039C	441.157	439.894	505.123	349.468	499.769	421.669
YER040W	337.657	327.548	371.2	305.536	418.262	371.575
YER041W	257.192	225.501	250.751	184.677	275.653	250.692
YER042W	760.67	607.649	661.746	424.84	705.236	568.656
YER043C	1989.35	1985.62	2492.52	1814.15	2305.14	1896.12
YER044C	791.11	753.203	910.292	645.597	992.179	874.872
YER044C-A	302.71	236.977	266.09	195.768	324.95	285.374
YER045C	212.598	221.301	263.517	377.812	505.189	450.229
YER046W	366.193	369.328	453.684	337.687	513.787	469.738
YER047C	306.613	299.165	339.695	290.985	411.317	378.173
YER048C	359.907	335.585	389.19	293.95	430.417	384.679
YER048W-A	603.063	536.443	654.508	566.233	842.083	739.365
YER049W	586.451	549.844	599.748	381.698	567.021	470.06
YER050C	401.163	345.234	436.031	375.606	532.789	509.481
YER051W	278.621	238.311	270.605	202.696	329.449	299.845
YER052C	755.183	742.252	879.452	604.899	859.963	715.968
YER053C	371.751	363.91	439.408	642.699	923.341	1023.89
YER054C	317.923	275.294	332.156	312.171	457.882	457.722
YER055C	988.912	959.113	1139.86	1128.62	1555.12	1346.11
YER056C	1928.66	1775.65	2076.34	1597.26	2264.93	1702.02
YER056C-A	2789.39	2279.42	2544.92	2033.39	3256.5	2609.1
YER057C	728.74	706.675	858.712	608.678	814.093	753.161
YER058W	361.582	360.077	413.536	301.287	421.572	386.29
YER059W	405.887	378.877	450.441	316.482	447.476	400.952
YER060W	510.47	483.972	535.126	301.321	427.994	380.659
YER060W-A	278.411	249.022	287.821	215.018	327.065	288.556
YER061C	241.004	237.264	278.19	241.906	340.822	307.147
YER062C	270.909	282.486	318.437	486.854	623.554	595.954
YER063W	1087.58	969.313	1024.11	854.61	1365.36	1179.3
YER065C	696.511	706.242	816.715	638.201	831.39	750.942
YER067W	289.485	274.119	355.915	911.754	1315.83	1385.8
YER068W	589.254	552.036	618.12	481.291	688.898	590.17
YER069W	353.522	342.769	380.737	279.798	415.569	362.865
YER070W	1601.7	1464.24	1848.36	1383.18	1965.19	1630.81
YER072W	2675.98	2547.35	3174.62	3060.58	4105.07	3639.87
YER073W	1888.19	1864.45	2221.47	1371.12	1855.59	1591.57
YER074W	2888.3	2373.77	2703.57	2276.25	3484.31	2785.37
YER074W-A	483.897	373.006	436.741	339.097	561.109	496.126
YER075C	402.744	372.619	426.68	296.627	451.371	370.404
YER078C	331.198	284.537	337.007	276.386	402.723	363.999
YER080W	312.822	280.763	316.692	252.06	381.9	347.904
YER081W	1363.79	1235.3	1440.06	1112.1	1617.96	1386.75
YER082C	550.838	527.69	583.475	441.254	624.15	511.54
YER083C	532.94	525.309	635.866	492.418	639.055	545.962
YER086W	597.658	585.055	685.965	497.876	669.731	540.228
YER087W	299.602	268.331	309.2	215.652	317.169	281.253
YER087C-B	716.142	641.233	668.376	547.236	812.398	691.604
YER088C	635.311	641.753	789.173	684.14	903.823	797.752
YER089C	802.767	847.127	986.174	772.262	1003.76	902.655
YER090W	481.39	474.655	536.708	406.391	576.252	506.708
YER091C	1541.84	1534.81	1893.96	1085.65	1455.74	1238.53
YER092W	773.4	763.071	934.97	700.732	956.938	857.114
YER093C	298.005	268.083	300.114	226.762	351.991	308.405
YER093C-A	475.452	490.06	558.965	377.24	544.777	467.726
YER094C	887.72	905.072	1128.66	824.248	1110.84	1021.42
YER095W	575.199	556.904	655.174	536.037	704.333	622.016
YER096W	142.22	131.918	138.89	115.433	163.344	163.369
YER098W	217.861	203.998	228.974	194.296	298.439	282.081
YER099C	462.288	467.323	561.988	430.856	617.462	512.054
YER100W	466.776	399.323	465.051	360.371	548.03	479.216
YER101C	260.112	233.615	271.661	203.91	295.133	277.227
YER102W	3385.37	2954.47	3385.45	2735.45	4084.92	3258.83
YER103W	251.387	263.198	293.161	230.056	330.049	319.402
YER104W	370.669	362.246	410.95	286.345	386.2	364.858
YER105C	418.354	378.106	407.766	294.974	465.739	397.37
YER106W	125.02	107.561	111.737	82.0954	119.691	119.183
YER107C	475.026	474.642	558.504	410.944	545.836	459.278
YER109C	320.176	304.831	329.297	254.238	372.183	337.775
YER110C	654.204	599.924	662.274	467.221	668.921	550.835
YER111C	291.555	247.797	264.412	227.147	362.584	318.94
YER112W	537.418	442.786	525.759	382.002	604.142	520.49
YER113C	429.048	397.348	462.105	298.15	441.834	398.08
YER114C	345.613	339.73	373.131	304.875	422.831	368.286
YER115C	476.522	429.364	441.357	275.249	414.292	387.914
YER116C	421.674	448.613	547.25	358.033	485.795	434.399
YER117W	3542.88	2979.67	3439.91	2863.13	4246.16	3412.14
YER118C	539.483	525.873	583.838	477.763	705.12	580.841
YER119C	397.835	392.876	499.615	409.687	549.228	509.171
YER120W	785.036	762.395	906.02	721.651	1018.81	890.298
YER122C	730.403	633.696	722.531	598.47	891.835	757.961
YER123W	452.268	422.866	471.39	369.242	545.705	479.195
YER124C	1220.22	1013.23	1213.17	1260.95	1958.63	1630.21
YER125W	533.671	512.605	570.294	474.67	676.801	608.768
YER126C	1024.46	942.28	1084.73	770.712	1080.71	828.831
YER127W	740.978	712.417	782.389	499.609	679.957	529.256
YER129W	388.145	359.181	393.044	309.939	456.215	388.26
YER131W	3143.07	2624.65	3044.7	2364.55	3638.28	2883.94
YER132C	434.019	396.774	449.782	317.227	472.685	406.54
YER133W	879.502	727.292	800.13	708.127	1093.04	961.732
YER136W	509.553	482.536	525.724	428.405	633.154	604.832
YER139C	323.313	280.284	307.668	265.799	391.723	348.587
YER141W	481.193	442.344	499.508	464.962	658.679	631.583
YER142C	249.181	201.405	208.077	165.139	278.87	238.129
YER143W	428.459	426.481	482.286	370.847	511.038	460.918
YER144C	375.634	346.942	360.312	389.104	567.487	495.376
YER145C	1068.81	1060.71	1397.57	861.801	1191.2	975.841
YER146W	726.808	686.496	851.278	534.787	820.575	661.008
YER147C	371.959	383.816	445.776	321.453	440.956	376.994
YER148W	797.074	710.452	767.406	643.221	961.585	805.396
YER149C	400.776	372.093	414.255	285.812	428.611	368.697
YER150W	261.107	270.652	309.81	301.969	376.65	357.991
YER151C	429.349	412.414	453.145	355.461	509.535	454.038
YER152C	412.168	427.001	528.671	392.011	507.149	425.078
YER153C	382.747	382.722	480.378	285.38	380.517	332.518
YER154W	735.497	711.078	825.145	614.458	832.099	685.126
YER155C	503.228	441.073	483.307	405.461	621.313	526.071
YER157W	333.214	296.235	327.181	242.594	367.132	325.034
YER159C	771.273	686.534	817.467	794.241	1177.04	992.595
YER161C	397.068	390.785	445.918	367.189	504.739	459.867
YER162C	234.499	221.243	267.874	202.599	295.513	271.957
YER164W	329.843	307.768	338.781	245.753	359.611	322.17
YER165W	1276.49	1204.25	1396.12	1105.51	1516.17	1210.03
YER166W	355.607	335.038	374.41	302.389	445.566	387.825
YER167W	395.595	401.193	452.241	400.868	558.5	475.16
YER168C	388.607	331.673	375.257	271.987	418.995	360.697
YER169W	330.722	295.13	323.769	250.278	357.557	316.321
YER170W	390.743	363.947	414.31	306.021	432.428	386.999
YER171W	385.318	343.175	369.65	284.198	442.7	381.219
YER172C	329.538	299.535	320.301	258.472	383.317	336.231
YER173W	335.725	315.018	365.953	264.381	381.827	325.379
YER174C	448.237	408.229	435.354	309.064	459.379	396.556
YER175C	345.183	323.508	342.63	237.538	385.977	338.744
YER176W	681.556	606.853	695.308	473.259	739.329	629.209
YER177W	1883.91	1759.57	2154.13	1813.26	2569.4	2377.94
YER178W	623.304	645.017	794.806	632.37	864.602	772.941
YER179W	169.851	158.281	185.518	163.244	265.601	232.707
YER180C	406.344	339.747	353.818	274.127	435.8	377.865
YER180C-A	480.715	404.593	455.032	359.361	488.913	459.155
YER183C	356.549	313.457	367.777	264.328	379.479	341.79
YER185W	159.348	133.431	154.753	119.557	190.789	158.408
YER190W	436.775	448.554	519.799	358.66	495.896	465.209
YFL062W	138.215	124.906	140.508	154.4	229.9	225.74
YFL060C	209.51	195.763	222.505	154.049	249.272	221.791
YFL059W	177.697	198.71	226.927	162.806	216.836	215.21
YFL058W	130.521	144.608	170.177	134.318	170.376	162.534
YFL057C	328.74	324.375	381.691	309.147	400.924	405.114
YFL056C	364.75	364.253	372.55	333.623	448.297	407.842
YFL055W	179.824	171.982	203.176	157.197	220.942	209.224
YFL053W	154.685	169.52	195.772	151.077	207.536	193.295
YFL050C	246.648	238.966	261.281	247.371	344.906	305.4
YFL049W	295.912	261.279	299.006	299.508	447.767	391.054
YFL048C	370.082	342.698	394.271	379.131	555.957	492.357
YFL047W	300.958	270.241	304.658	272.521	413.914	351.155
YFL045C	1533.8	1342.19	1558.62	1159.8	1685	1466.07
YFL044C	686.02	658.452	802.471	512.952	696.322	613.645
YFL041W	295.053	296.85	354.08	230.506	303.186	298.171
YFL039C	1935.14	1816.03	2170.85	1980.68	2813.53	2421.35
YFL038C	963.264	978.2	1251.06	1017.7	1342.28	1200.63
YFL037W	683.854	706.372	876.978	623.256	824.309	722.16
YFL036W	358.093	331.092	361.297	300.654	461.555	391.607
YFL034C-B	539.366	507.141	555.583	400.213	618.955	520.666
YFL034C-A	3789.67	3020.71	3520.53	2886.09	4493.1	3607.42
YFL033C	275.082	271.904	309.03	227.625	327.987	294.628
YFL031W	2114.61	1954.31	2467.53	2174.14	3003.5	2602.29
YFL030W	231.913	238.631	271.111	197.649	285.648	268.594
YFL029C	244.364	231.561	272.068	195.435	289.051	239.256
YFL028C	307.992	295.114	362.253	245.603	357.129	322.591
YFL027C	360.405	324.898	361.784	282.938	429.049	373.748
YFL026W	2266.14	1966.64	2575.39	2067.05	2927.91	2407.83
YFL025C	400.896	358.253	403.395	322.613	489.862	418.05
YFL024C	647.456	577.307	638.132	544.559	822.034	693.487
YFL023W	367.932	337.47	369.625	247.143	380.015	317.854
YFL022C	830.817	822.193	909.247	677.11	960.536	794.723
YFL021W	879.765	882.029	1076.78	902.595	1295.07	1097.23
YFL020C	117.453	123.644	132.706	134.852	165.449	187.054
YFL018C	512.257	498.272	567.914	505.286	709.97	652.756
YFL017W-A	756.524	593.848	625.763	433.369	726.084	609.711
YFL017C	556.562	493.683	583.812	415.397	652.971	551.089
YFL016C	668.469	729.594	827.065	633.788	860.415	801.505
YFL014W	190.188	203.428	212.785	909.714	1184.2	1330.48
YFL013C	341.678	320.519	377.333	330.336	480.698	429.441
YFL011W	110.926	108.73	121.555	89.0244	129.145	129.279
YFL010W-A	405.421	388.501	486.628	387.26	549.529	489.293
YFL010C	462.149	470.464	618.163	473.021	595.502	534.971
YFL009W	336.468	303.643	348.063	254.325	373.093	329.994
YFL008W	343.923	300.761	317.737	249.839	394.462	338.316
YFL007W	360.069	343.423	365.377	268.165	396.205	356.685
YFL005W	765.529	759.575	904.86	621.089	873.99	750.76
YFL004W	603.639	540.715	574.935	495.642	775.703	654.541
YFL003C	166.734	149.157	156.986	112.606	183.869	167.869
YFL002C	444.692	395.607	411.929	302.437	454.697	392.882
YFL001W	419.486	393.273	430.794	323.368	479.145	413.848
YFR001W	666.09	521.013	574.76	428.224	642.932	532.534
YFR002W	533.275	468.252	513.399	389.412	600.549	524.453
YFR003C	466.338	439.089	504.83	423.59	615.148	582.375
YFR004W	805.467	759.52	916.22	726.216	1030.57	898.373
YFR005C	545.277	452.626	491.489	361.382	595.42	501.083
YFR007W	297.001	271.046	303.908	258.591	394.478	340.08
YFR008W	214.522	208.104	236.985	198.813	292.177	260.62
YFR009W	552.435	513.599	572.133	466.384	668.815	584.012
YFR010W	519.34	458.378	494.215	412.865	674.686	587.807
YFR011C	490.617	380.724	434.016	322.569	514.473	466.861
YFR013W	311.605	287.042	319.475	256.405	382.229	337.863
YFR014C	406.833	367.614	390.48	315.243	461.526	443.881
YFR015C	184.809	196.483	229.733	349.203	492.763	560.846
YFR016C	244.1	231.008	246.118	212.438	298.381	291.334
YFR019W	248.666	241.391	268.93	227.109	341.024	301.27
YFR021W	324.968	338.757	416.353	297.698	411.894	383.166
YFR022W	231.119	224.137	263.978	203.446	291.372	270.701
YFR023W	122.843	94.1154	100.184	69.4346	114.451	107.056
YFR024C-A	351.513	341.023	374.838	279.352	396.691	354.214
YFR025C	328.858	309.055	391.558	266.168	364.095	328.778
YFR026C	218.378	200.517	232.404	178.688	256.638	238.586
YFR027W	291.062	289.676	336.576	260.87	368.717	321.186
YFR028C	474.852	452.772	527.321	407.228	591.173	507.122
YFR029W	322.504	314.104	397.958	261.621	361.437	314.059
YFR030W	362.361	363.873	403.145	290.161	411.139	365.544
YFR031C	320.719	286.696	314.747	257.338	396.062	348.71
YFR031C-A	2806.47	2696.62	3197.98	2362.34	3225.96	2563.32
YFR032C-A	4385.31	3658.82	4359.69	3519.28	5205.52	4126.36
YFR033C	1898.94	1800.64	2345.07	1755.13	2356.23	2080.67
YFR034C	1080.97	1181.33	1526.49	874.584	1116.21	945.378
YFR036W	528.657	522.542	660.928	358.126	554.544	456.307
YFR037C	540.012	535.872	632.306	476.467	650.337	558.115
YFR038W	283.289	248.463	268.489	189.737	291.076	253.269
YFR040W	540.7	471.444	531.144	426.272	644.318	530.605
YFR041C	398.868	326.412	387.201	325.475	492.343	434.909
YFR042W	332.175	292.978	334.011	284.067	406.616	371.348
YFR043C	379.427	305.951	326.492	236.894	372.369	348.155
YFR044C	478.819	476.467	557.208	480.852	652.392	586.645
YFR046C	299.239	270.628	323.368	239.094	327.366	297.58
YFR047C	309.319	287.98	353.002	244.272	348.21	316.397
YFR048W	326.214	298.373	338.925	262.751	376.42	335.384
YFR049W	463.191	434.91	538.532	446.564	621.064	586.26
YFR050C	724.375	685.58	826.83	691.308	958.163	820.907
YFR051C	652.519	640.94	766.59	569.067	762.005	671.41
YFR052W	694.264	592.69	702.771	661.465	989.477	885.636
YFR053C	254.755	265.057	336.248	1023.21	1436.18	1738.31
YGL263W	0	0	0	0.122406	0.100323	0.0267148
YGL258W	134.452	142.433	170.124	128.075	191.939	180.449
YGL257C	367.446	309.301	334.191	253.988	415.969	348.004
YGL256W	551.279	543.967	653.738	491.711	643.949	548.402
YGL255W	443.595	440.704	529.184	460.36	605.231	516.55
YGL254W	425.585	435.683	546.501	388.331	546.67	483.039
YGL253W	2290.79	2188.4	2668.83	1416.62	1960.95	1665.82
YGL252C	429.421	400.143	443.925	342.173	517.338	449.482
YGL251C	222.886	194.838	208.059	182.06	293.17	253.87
YGL250W	234.288	226.662	289.561	210.296	305.393	282.611
YGL249W	259.094	203.253	221.167	182.917	292.763	251.549
YGL248W	370.846	355.708	386.9	430.251	606.834	588.608
YGL247W	606.777	548.536	602.436	439.302	666.214	599.512
YGL246C	434.029	391.129	418.836	318.738	479.963	398.895
YGL245W	628.811	600.716	706.134	513.617	708.621	602.688
YGL244W	362.893	351.196	387.323	308.117	459.802	406.291
YGL243W	277.752	250.439	276.287	222.273	326.736	286.609
YGL241W	269.073	244.086	280.957	193.18	308.801	258.673
YGL240W	386.378	372.816	415.819	286.697	421.337	376.105
YGL238W	568.429	472.987	528.257	407.978	652.609	548.225
YGL237C	293.17	303.216	364.025	284.427	372.426	367.872
YGL236C	339.408	357.505	432.254	274.951	352.136	315.093
YGL234W	533.357	543.781	628.97	458.365	590.12	501.626
YGL233W	272.716	231.328	244.369	191.673	331.909	274.511
YGL232W	427.279	366.332	403.186	278.497	450.692	397.063
YGL231C	514.816	448.201	548.021	460.237	657.428	572.935
YGL229C	170.229	147.819	166.9	126.889	198.683	175.535
YGL228W	408.207	402.693	453.592	343.948	481.657	456.187
YGL227W	246.503	230.566	259.97	209.766	313.599	302.014
YGL226C-A	513.474	439.01	540.01	389.303	557.809	507.45
YGL226W	552.994	473.871	584.591	412.049	625.124	533.836
YGL225W	1092.29	1035.8	1217.25	885.189	1252.84	1067.68
YGL224C	643.023	609.683	676.272	522.351	766.319	659.722
YGL223C	374.602	350.691	396.854	301.977	461.664	396.724
YGL222C	637.655	530.665	596.275	552.333	827.497	701.04
YGL221C	521.134	556.52	657.766	482.458	648.679	542.573
YGL220W	453.572	455.295	567.013	401.479	514.647	472.849
YGL219C	439.818	396.029	478.936	376.509	524.423	470.689
YGL216W	366.413	351.385	403.489	310.12	460.505	402.717
YGL215W	807.8	728.296	820.319	627.422	954.941	748.866
YGL213C	381.244	331.217	369.078	278.814	415.061	366.829
YGL212W	310.251	314.262	382.497	290.453	393.085	355.048
YGL211W	600.831	598.365	677.782	523.715	669.404	576.894
YGL210W	918.023	887.506	1032.36	625.233	881.366	721.559
YGL209W	1045.65	1029.63	1302.26	652.32	865.99	743.588
YGL208W	333.666	343.136	386.9	255.983	349.589	326.992
YGL207W	568.019	493.872	526.943	430.641	675.394	558.485
YGL206C	465.736	429.816	467.685	404.491	622.249	562.072
YGL205W	200.912	185.78	208.961	142.153	217.568	194.349
YGL203C	338.723	315.737	368.394	262.967	370.804	332.979
YGL202W	621.738	590.119	670.09	525.762	743.341	609.568
YGL201C	329.986	328.256	371.365	277.892	393.107	358.652
YGL200C	764.759	741.799	937.185	608.812	814.282	719.325
YGL198W	671.613	727.487	900.49	643.66	861.803	795.566
YGL197W	324.975	320.767	351.934	312.816	449.858	414.214
YGL196W	568.213	526.735	616.68	449.964	623.779	560.341
YGL195W	486.052	454.719	493.653	395.714	574.611	500.542
YGL194C	491.169	446.147	515.749	377.622	571.915	503.133
YGL192W	597.496	530.666	586.374	491.84	714.029	643.861
YGL191W	862.533	763.455	943.911	836.181	1258.88	1089.75
YGL190C	654.531	578.434	618.229	466.313	687.817	631.839
YGL189C	3957.56	3246.83	3790.72	3075.42	4612.54	3765.05
YGL187C	1008.62	875.881	1023.3	813.439	1206.43	1060.04
YGL186C	461.251	439.806	495.945	371.697	514.713	461.259
YGL184C	157.005	169.495	191.318	165.305	234.035	217.35
YGL183C	119.098	101.508	98.0667	78.463	134.651	125.132
YGL181W	372.512	357.686	418.738	360.101	485.845	439.652
YGL180W	210.398	184.696	208.769	151.887	229.278	217.634
YGL179C	232.514	219.684	254.707	198.753	306.943	279.078
YGL178W	503.898	431.179	470.66	386.497	591.277	487.36
YGL175C	351.107	293.788	328.389	235.649	354.817	326.044
YGL174W	443.307	393.709	439.917	292.196	443.263	401.74
YGL173C	548.22	490.725	513.096	422.354	656.168	569.965
YGL172W	515.241	502.261	576.102	396.091	540.968	492.533
YGL171W	492.024	426.486	484.421	300.686	436.982	373.93
YGL170C	179.259	161.369	159.652	95.7967	160.83	140.895
YGL169W	391.516	367.009	414.854	290.432	404.854	352.465
YGL168W	758.64	694.718	760.06	526.594	832.431	645.761
YGL167C	601.143	562.582	630.12	514.813	760.956	633.835
YGL166W	331.853	384.47	442.684	297.057	403.802	367.276
YGL164C	348.275	311.102	355.673	270.697	392.037	354.762
YGL163C	287.522	280.234	311.013	226.827	320.028	299.183
YGL162W	660.633	642.721	815.536	595.411	792.066	712.899
YGL161C	436.932	459.222	555.239	434.715	621.68	555.527
YGL160W	277.614	235.217	257.866	226.072	349.166	312.748
YGL158W	113.89	117.861	129.895	116.099	160.586	152.488
YGL157W	353.583	318.612	342.857	331.313	497.152	471.947
YGL156W	316.11	306.799	327.852	261.332	390.725	348.574
YGL155W	353.617	329.666	410.756	296.794	417.592	351.715
YGL154C	417.861	389.265	427.661	326.815	447.954	413.993
YGL153W	356.869	322.151	343.093	242.018	370.417	329.516
YGL151W	344.186	293.037	321.8	264.699	435.859	373.987
YGL150C	368.663	357.906	402.777	319.854	466.38	412.618
YGL148W	820.76	832.882	1028.43	610.671	813.816	661.365
YGL147C	3212.91	2884.55	3896.37	2898.94	3841.49	3080.18
YGL145W	278.923	246.508	267.702	231.369	341.9	300.345
YGL144C	270.896	257.658	285.304	211.313	306.895	270.91
YGL143C	285.424	282.824	321.507	232.967	320.567	297.041
YGL142C	264.825	245.139	260.456	187.724	284.119	264.874
YGL141W	233.914	207.012	219.602	199.898	293.636	280.377
YGL139W	279.447	270.547	295.779	231.576	335.451	295.086
YGL137W	603.771	569.002	638.889	498.512	697.969	602.954
YGL136C	526.612	468.291	513.588	337.786	537.79	465.195
YGL135W	4166.67	3860.8	4843.01	3814.12	5176.45	4202.81
YGL134W	535.814	481.793	538.401	415.179	629.01	549.717
YGL133W	428.195	376.163	402.932	337.875	532.604	453.624
YGL131C	267.36	252.366	264.959	242.634	368.815	329.789
YGL130W	330.508	308.235	348.602	280.099	423.331	366.44
YGL129C	362.76	325.175	358.529	270.885	424.501	374.223
YGL128C	365.531	358.224	438.12	286.926	392.573	351.607
YGL127C	552.366	514.342	614.472	437.24	655.946	569.607
YGL126W	453.969	491.818	659.482	473.326	608.934	499.29
YGL125W	488.066	526.689	644.782	448.671	610.405	551.479
YGL124C	281.229	250.767	279.16	211.458	324.506	289.394
YGL123W	4567.5	4276.63	5239.09	4239.52	5624.77	4546
YGL122C	1111.8	1079.68	1246.73	1044.91	1431.26	1225.79
YGL121C	555.87	512.098	613.637	540.346	710.632	686.023
YGL120C	615.836	577.854	630.782	439.409	611.908	487.719
YGL119W	263.733	229.549	230.818	172.917	262.431	242.559
YGL116W	428.123	411.892	478.466	407.102	591.132	512.836
YGL115W	559.597	511.777	622.031	508.366	708.901	639.974
YGL113W	276.688	254.655	270.469	198.756	294.594	267.279
YGL112C	365.739	340.53	367.817	294.776	416.333	375.296
YGL111W	532.897	456.634	483.124	351.653	530.202	420.422
YGL110C	382.588	341.626	345.376	265.987	428.129	383.398
YGL107C	456.425	427.777	486.986	346.073	521.882	452.772
YGL106W	826.057	833.927	1017.91	680.295	822.669	760.591
YGL105W	1001.78	923.714	1076.33	881.255	1225.02	1017.38
YGL104C	255.621	243.339	263.095	207.651	298.337	264.676
YGL103W	7628.86	6372.99	7652.66	5777.46	8646.91	6970.66
YGL100W	427.492	388.256	459.409	336.819	479.973	432.324
YGL099W	467.562	406.925	449.531	299.56	436.086	370.626
YGL098W	421.122	391.693	446.72	345.706	502.471	425.686
YGL097W	546.012	548.537	640.833	464.881	623.125	546.753
YGL096W	194.37	180.979	195.51	173.236	285.078	259.04
YGL095C	273.744	237.878	257.979	231.191	374.323	314.999
YGL094C	325.657	307.374	336.84	268.953	389.028	347.602
YGL093W	272.802	265.44	294.877	241.409	351.868	324.497
YGL092W	487.801	433.152	450.989	359.717	543.054	464.289
YGL091C	424.834	382.303	465.728	355.089	523.679	456.506
YGL090W	258.714	251.016	280.484	217.717	337.3	288.914
YGL089C	259.327	260.39	284.018	210.64	276.389	254.599
YGL087C	1952.56	1714.3	2049.09	1336.05	2053.81	1694.69
YGL086W	330.351	278.121	294.893	243.184	399.875	335.163
YGL084C	315.027	268.262	292.118	231.916	365.957	329.103
YGL083W	383.979	345.263	370.894	303.37	460.857	413.537
YGL078C	889.187	795.751	892.67	614.622	861.705	704.922
YGL077C	1077.49	1011.08	1173.83	696.347	977.257	809.603
YGL076C	3160.82	2685.51	3108.74	2474.55	3859.61	2984.08
YGL075C	299.549	292.033	324.949	227.276	317.664	286.095
YGL073W	623.162	587.37	679.767	463.092	683.309	572.867
YGL071W	670.702	642.984	744.603	476.229	672.178	571.772
YGL070C	685.61	631.702	720.326	522.643	781.622	735.843
YGL068W	683.415	670.134	758.851	585.381	813.635	734.376
YGL067W	449.889	407.765	442.13	310.469	465.73	406.889
YGL066W	376.032	369.703	422.005	328.351	458.66	413.181
YGL065C	390.257	318.498	343.667	286.371	437.871	365.886
YGL064C	311.089	279.543	305.357	240.177	378.876	319.141
YGL063W	411.955	438.072	539.444	333.786	457.683	391.85
YGL062W	482.884	497.451	498.595	418.65	598.011	524.304
YGL061C	331.219	283.839	334.639	259.499	377.238	337.618
YGL060W	259.769	247.461	276.086	215.914	314.628	289.879
YGL059W	297.112	255.964	298.837	234.099	362.769	327.214
YGL058W	624.345	581.577	697.063	520.057	758.003	641.876
YGL057C	392.04	327.406	371.873	244.624	392.197	322.859
YGL056C	808.967	754.153	898.473	625.052	846.346	727.261
YGL055W	1859.37	1675.33	2211.83	1597.45	2230.53	1786.11
YGL054C	931.983	733.43	917.463	702.962	1098.94	955.809
YGL053W	383.953	352.879	401.587	366.984	506.369	481.312
YGL051W	290.247	303.605	344.521	255.975	366.138	326.3
YGL050W	467.907	421.058	454.627	351.001	538.92	458.835
YGL049C	301.063	286.101	318.657	308.488	444.583	403.014
YGL048C	617.539	571.485	671.168	556.203	814.454	721.945
YGL047W	687.495	586.961	702.939	458.879	662.955	611.546
YGL045W	237.163	239.679	276.959	254.233	352.576	341.447
YGL044C	361.646	325.583	379.599	322.26	461.46	415.883
YGL043W	546.103	525.625	632.168	484.47	639.088	536.885
YGL040C	732.776	726.969	856.964	549.71	718.424	659.417
YGL039W	397.269	348.098	386.851	256.367	396.045	351.715
YGL038C	590.656	525.898	582.393	416.472	644.457	567.566
YGL037C	668.939	686.74	858.982	969.67	1327.14	1548.65
YGL035C	541.948	533.228	660.355	524.195	724.817	648.989
YGL033W	159.93	143.552	140.865	129.821	204.781	189.913
YGL032C	431.017	407.459	500.302	457.672	680.719	610.017
YGL031C	2679.44	2224.56	2451.1	1957.59	3118.95	2485.65
YGL030W	4852.76	3918.8	4760.64	3606.55	5557.45	4469.63
YGL029W	773.246	583.977	659.231	422.959	633.976	527.539
YGL028C	1733.7	1580.05	2140.01	2071.16	2856.49	2331.03
YGL027C	345.874	331.187	363.372	282.148	430.929	370.937
YGL026C	539.052	555.571	654.846	485.165	668.24	569.656
YGL025C	434.496	428.986	543.381	361.511	516.893	437.206
YGL023C	343.028	366.413	455.602	358.161	448.545	402.995
YGL022W	613.255	609.157	706.195	570.719	771.283	683.785
YGL021W	444.998	383.686	421.74	477.498	737.095	639.174
YGL020C	463.696	418.095	499.929	414.618	638.276	531.273
YGL019W	566.837	553.998	654.14	486.827	667.597	577.063
YGL018C	336.309	355.142	409.025	315.067	420.515	397.092
YGL017W	320.175	310.11	344.636	259.894	353.242	315.835
YGL016W	321.673	280.903	317.183	223.72	342.67	307.16
YGL014W	538.282	496.618	538.815	426.949	641.929	544.413
YGL013C	372.621	330.327	359.747	297.724	447.173	386.495
YGL012W	675.024	653.647	743.766	547.3	782.391	690.409
YGL011C	836.074	812.247	916.926	768.156	1124.03	955.472
YGL009C	1277.88	1272.64	1488.99	989.882	1388.31	1161.38
YGL008C	8252.9	7537.55	9224.64	6918.79	9881.6	8147.76
YGL006W	241.324	226.726	243.138	238.236	371.17	345.387
YGL005C	325.894	281.708	333.241	257.587	392.283	340.968
YGL004C	316.939	295.223	314.27	237.257	359.795	316.613
YGL003C	440.253	434.285	516.796	379.249	520.464	473.246
YGL002W	373.51	338.336	401.232	301.269	457.265	403.992
YGL001C	462.655	427.576	495.373	382.461	548.573	479.269
YGR002C	370.98	331.855	349.852	299.763	449.694	403.594
YGR003W	285.088	251.996	282.539	208.528	323.731	277.066
YGR004W	281.82	274.63	305.007	211.728	308.996	280.029
YGR005C	371.594	333.023	381.395	303.086	446.658	386.933
YGR006W	509.181	466.369	539.624	441.645	664.21	568.15
YGR007W	589.285	579.568	632.874	613.983	898.594	807.881
YGR008C	646.912	577.183	732.07	972.057	1457.31	1469.02
YGR009C	345.358	352.926	396.02	346.771	490.569	456.493
YGR010W	416.76	419.44	496.276	340.602	486.872	437.961
YGR012W	377.089	401.037	456.234	327.966	431.628	388.52
YGR013W	415.584	401.08	473.572	379.813	532.989	483.62
YGR014W	807.099	844.279	976.833	954.855	1295.08	1129.75
YGR019W	335.543	345.999	411.398	415.321	598.016	583.567
YGR020C	624.113	610.904	765.466	644.849	883.073	833.373
YGR023W	277.161	285.565	367.781	346.577	461.948	442.303
YGR024C	416.277	339.117	391.593	305.688	470.567	437.917
YGR027C	3507.41	2927.76	3370.54	2829.95	4345.54	3484.57
YGR028W	289.147	270.176	301.533	275.641	426.024	388.659
YGR029W	392.718	365.427	420.884	335.214	475.583	449.877
YGR030C	1270.56	958.977	1127.03	727.939	1208.12	931.781
YGR031C-A	532.192	575.538	701.65	505.208	646.024	551.364
YGR032W	316.05	294.183	318.713	476.504	684.885	590.745
YGR033C	585.806	519.157	595.391	462.935	690.68	583.699
YGR034W	2479.43	1994.96	2239.86	1900.59	2994.57	2360.31
YGR036C	432.331	377.635	426.426	316.378	490.674	416.877
YGR037C	1068.26	1023.51	1224.72	817.03	1233.73	1041.16
YGR038W	612.678	544.785	607.969	459.977	683.862	616.14
YGR040W	795.566	714.541	825.989	671.571	982.729	834.821
YGR041W	582.195	538.544	635.673	460.484	708.196	601.656
YGR043C	166.686	153.394	168.007	140.11	206.081	198.429
YGR044C	318.126	298.642	355.207	408.482	595.14	503.879
YGR046W	360.956	315.958	352.849	333.968	530.46	468.267
YGR047C	262.347	232.279	255.229	214.123	321.04	279.893
YGR048W	415.279	399.006	446.255	379.442	569.454	502.617
YGR049W	626.718	525.909	683.076	543.425	782.137	699.161
YGR054W	898.336	801.263	872.161	673.46	995.408	838.257
YGR055W	2272.15	2105.77	2512.11	1646.8	2477.65	2130.39
YGR056W	440.48	396.678	416.685	336.914	533.328	449.871
YGR057C	369.734	297.528	341.86	243.64	369.621	323.264
YGR058W	330.458	329.248	393.073	271.194	397.31	332.908
YGR059W	200.629	172.865	187.595	134.332	209.84	194.061
YGR060W	2004.32	1853.33	2504.15	1858.16	2548.4	2088.85
YGR061C	567.317	547.685	611.434	471.849	666.337	568.732
YGR062C	758.369	703.894	804.727	644.219	976.79	843.532
YGR063C	827.858	808.924	1058.43	787.188	1043.07	934.061
YGR065C	459.234	433.238	503.506	367.01	516.989	448.456
YGR068C	315.204	299.959	350.885	285.978	401.465	363.48
YGR070W	210.466	188.363	205.587	265.959	421.785	402.58
YGR072W	352.252	285.091	323.145	253.519	420.729	369.577
YGR074W	770.382	741.578	846.982	649.095	867.984	755.053
YGR075C	552.515	480.912	518.065	382.268	607.639	503.428
YGR076C	498.002	396.262	423.485	357.967	517.956	476.663
YGR077C	425.389	418.058	468.34	314.311	477.082	407.155
YGR078C	833.077	785.864	869.052	601.76	825.002	698.009
YGR080W	562.912	519.691	568.255	427.611	615.453	517.668
YGR081C	769.242	679.378	793.422	583.064	855.977	699.688
YGR082W	639.497	621.673	716.224	536.404	741.654	670.737
YGR083C	561.177	511.403	587.372	422.554	616.225	513.516
YGR084C	721.598	665.494	735.005	499.773	755.608	637.54
YGR085C	3567.05	3275.64	3911.32	3097.46	4448.01	3597.23
YGR086C	1228.37	1205.77	1558.5	1530.71	2076.28	2052.02
YGR087C	163.923	162.555	198.075	158.765	210.43	199.656
YGR088W	290.431	265.555	327.761	262.738	373.32	363.585
YGR089W	397.638	345.211	360.025	295.898	481.855	402.153
YGR090W	602.126	517.249	544.263	493.667	743.481	625.656
YGR091W	457.732	401.716	454.084	453.72	674.068	591.477
YGR092W	450.38	400.05	440.57	510.597	781.17	695.416
YGR094W	852.843	810.643	895.944	654.917	945.181	756.236
YGR095C	505.53	498.582	560.479	412.35	593.592	483.357
YGR096W	340.788	320.337	379.736	297.757	393.893	352.52
YGR097W	286.137	271.883	300.848	430.944	620.059	544.955
YGR098C	236.978	201.293	218.111	181.684	291.793	257.502
YGR099W	302.091	277.547	311.361	252.726	372.087	325.049
YGR100W	255.897	242.112	258.64	220.064	328.402	307.599
YGR101W	391.796	377.862	386.229	311.779	453.684	400.072
YGR102C	378.356	337.045	365.787	360.611	521.488	490.466
YGR103W	847.273	723.318	784.532	544.87	788.51	605.078
YGR104C	391.96	342.584	399.291	309.564	456.043	386.78
YGR105W	604.561	536.012	666.48	431.716	650.687	533.163
YGR106C	653.565	581.534	689.959	516.342	775.664	666.285
YGR108W	559.323	488.14	610.55	956.613	1494.5	1335.32
YGR109C	400.183	316.622	360.07	334.573	534.249	475.819
YGR110W	176.975	167.3	192.169	160.772	250.849	230.076
YGR112W	263.32	266.417	321.283	229.302	299.028	301.846
YGR113W	463.268	418.76	469.519	375.538	539.042	495.081
YGR116W	444.102	400.522	431.387	344.963	534.505	463.157
YGR118W	3452.16	2926.42	3456.42	2861.02	4205.64	3482.5
YGR119C	792.35	707.69	773.812	588.271	896.462	751.089
YGR120C	635.265	571.018	637.809	454.644	717.772	612.453
YGR121C	551.166	556.616	657.641	467.84	663.477	566.55
YGR122W	287.191	284.736	315.084	220.522	336.375	304.094
YGR123C	418.75	371.849	389.342	268.368	404.655	315.825
YGR124W	779.428	776.591	946.614	756.679	1004.43	838.928
YGR128C	592.49	489.381	522.127	371.878	590.494	468.886
YGR129W	364.433	309.6	365.936	291.771	366.334	332.894
YGR130C	428.063	414.983	466.027	403.034	584.732	576.07
YGR131W	318.638	278.143	315.048	220.976	347.02	333.073
YGR132C	532.425	512.908	588.1	479.731	650.094	615.763
YGR133W	356.662	341.165	384.888	283.467	407.022	388.376
YGR134W	312.676	298.307	331.396	245.838	358.462	322.476
YGR135W	868.481	781.397	925.856	746.371	1096.27	937.53
YGR136W	673.076	646.798	770.018	715.058	1007.33	885.951
YGR138C	335.859	337.016	409.137	475.405	624.566	566.506
YGR140W	308.872	270.148	292.439	225.053	356.02	295.733
YGR141W	375.435	366.679	396.704	291.951	433.279	387.541
YGR142W	660.596	580.819	639.939	429.939	672.646	626.1
YGR143W	359.385	361.819	409.142	458.56	662.113	594.121
YGR144W	177.548	184.731	229.28	125.166	178.847	179.757
YGR145W	505.582	443.175	477.145	336.308	482.252	385.792
YGR146C	1003.69	903.292	1086.62	934.907	1371.56	1211.9
YGR147C	626.532	592.873	718.666	530.496	680.548	621.828
YGR148C	2574.1	2180.34	2453.01	1993.75	2955.89	2405.54
YGR150C	298.535	263.078	280.822	225.514	357.026	308.337
YGR152C	471.239	430.25	519.718	339.516	497.935	413.932
YGR154C	417.796	361.38	406.597	337.536	522.844	450.985
YGR155W	2141.59	1944.13	2214.97	1650.03	2413.3	1941.22
YGR156W	1099.8	1001.75	1134.88	849.706	1280.63	1072.98
YGR157W	837.148	714.985	789.845	757.625	1221.02	1026.8
YGR158C	697.395	679.599	797.385	555.063	777.262	649.327
YGR159C	2543.69	2194.57	2477.58	1339.04	1828.69	1233.65
YGR162W	1006.3	937.926	1043.86	781.474	1119.4	895.262
YGR163W	426.372	407.913	460.287	320.371	486.578	435.531
YGR165W	423.079	368.053	422.309	337.627	517.195	463.91
YGR166W	339.667	298.553	312.576	303.849	497.278	419.69
YGR167W	572.356	546.763	650.923	552.532	762.008	716.944
YGR169C	403.079	389.988	443.187	289.259	406.75	344.311
YGR170W	342.463	305.884	336.292	249.515	372.86	335.453
YGR171C	308.331	281.217	294.053	214.406	335.481	291.383
YGR172C	452.075	414.973	472.892	345.224	521.703	432.708
YGR173W	585.799	537.742	637.16	462.604	653.736	554.899
YGR174C	360.277	365.689	401.939	409.406	596.837	540.757
YGR175C	1141.57	1116.8	1475.3	1178.74	1571.52	1303.04
YGR177C	744.715	709.107	844.714	538.809	792.416	650.108
YGR178C	742.467	722.943	795.824	551.473	813.154	656.18
YGR179C	300.891	293.625	342.437	270.007	404.701	365.148
YGR180C	550.692	516.599	638.682	433.474	615.235	562.402
YGR181W	890.47	875.165	917.658	667.621	1037.67	868.051
YGR183C	1414.87	1316.43	1641.43	1321.74	1892.8	1757.75
YGR184C	332.561	306.423	335.329	261.707	405.053	352.538
YGR185C	957.429	843.011	969.827	747.504	1112.56	929.876
YGR186W	435.204	387.844	456.774	372.207	519.583	458.871
YGR187C	622.113	491.226	555.351	325.616	521.028	409.916
YGR188C	213.016	199.252	215.77	160.975	249.079	226.431
YGR189C	1385.75	1354.66	1636.94	2288.66	3006.33	2544.38
YGR191W	652.943	606.11	658.971	561.859	797.43	661.684
YGR192C	11034.9	10090.5	13973	9099.5	12320.2	10616.8
YGR193C	526.743	478.253	586.68	383.836	567.156	521.228
YGR194C	250.543	225.965	250.895	207.372	327.264	315.82
YGR195W	814.879	744.011	853.121	642.988	932.73	764.88
YGR196C	326.969	306.237	346.883	267.046	366.413	339.669
YGR197C	447.011	436.106	485.117	339.218	490.19	446.551
YGR198W	544.153	479.298	515.432	396.837	612.222	522.866
YGR199W	420.321	381.014	400.316	304.093	428.702	388.419
YGR200C	616.73	542.11	598.124	437.073	639.696	521.385
YGR202C	465.703	438.282	545.282	361.05	486.291	446.278
YGR203W	401.14	459.182	561.272	350.326	493.109	411.232
YGR204W	696.444	773.201	929.114	708.493	918.659	809.322
YGR205W	296.937	266.169	331.888	241.93	380.472	356.549
YGR206W	545.61	445.061	493.128	397.423	634.967	550.811
YGR207C	406.916	357.173	393.199	348.053	534.725	465.772
YGR208W	615.787	542.605	654.815	523.54	750.71	635.788
YGR209C	842.523	801.57	906.223	658.154	977.225	911.813
YGR211W	1033.12	1011.63	1131.81	760.771	1046.85	900.047
YGR212W	267.083	238.545	239.246	199.225	304.753	277.313
YGR213C	281.934	242.249	273.735	230.255	355.167	321.757
YGR214W	2045.15	1825.17	2077.13	1606.98	2313.16	1880.39
YGR215W	600.443	527.856	551.813	414.921	643.433	533.852
YGR216C	359.815	308.826	350.12	266.883	418.304	350.664
YGR217W	235.017	209.806	217.938	193.513	292.698	258.273
YGR218W	467.66	405.909	423.843	358.264	554.266	482.18
YGR220C	593.902	534.586	582.722	472.883	696.505	620.619
YGR221C	336.371	299.401	346.524	277.395	404.774	359.242
YGR222W	377.042	333.126	372.982	320.391	502.442	476.224
YGR223C	307.639	309.464	344.567	307.298	464.313	431.124
YGR224W	211.803	198.931	235.169	196.863	275.824	255.565
YGR225W	88.2399	83.2555	91.0278	75.6572	119.124	119.719
YGR227W	312.027	277.824	298.534	249.143	386.333	332.652
YGR229C	652.588	619.719	688.255	564.019	807.16	663.146
YGR230W	322.171	291.921	326.362	316.799	504.943	442.087
YGR231C	494.339	475.461	556.333	468.797	618.127	599.089
YGR232W	514.496	461.55	529.616	376.517	603.337	542.606
YGR233C	513.628	458.799	490.219	453.693	726.622	591.19
YGR234W	3483.69	3093.95	4085.68	3163.68	4528.25	3687.38
YGR236C	305.762	311.132	384.35	297.02	411.039	378.24
YGR238C	211.215	199.567	213.891	152.674	230.816	209.38
YGR239C	506.454	502.025	612.689	438.203	618.899	514.789
YGR240C	1304.85	1277.94	1461.32	1157.35	1582.75	1347.25
YGR241C	571.965	554.733	603.296	487.439	717.934	615.138
YGR244C	425.46	404.105	471.494	480.494	657.008	619.424
YGR245C	568.04	519.293	562.712	394.372	560.867	434.111
YGR246C	274.013	253.217	307.018	229.049	318.576	283.001
YGR247W	223.236	224.349	276.487	237.495	283.441	259.114
YGR248W	124.879	144.447	171.6	175.299	238.733	255.614
YGR249W	139.105	146.161	154.369	123.85	169.961	161.347
YGR250C	276.376	263.524	295.912	302.914	440.676	396.779
YGR251W	529.978	484.422	551.223	340.423	476.382	413.288
YGR252W	508.198	463.712	502.611	406.846	623.767	526.578
YGR253C	917.695	851.241	1058.29	849.332	1174.26	1041.23
YGR254W	1083.03	1128.35	1598.03	1786.18	2367.21	2221.15
YGR255C	245.667	230.459	273.77	248.957	371.127	341.859
YGR256W	173.442	180.261	187.108	148.73	220.569	219.975
YGR257C	474.806	471.588	549.911	422.538	589.778	507.693
YGR258C	214.006	201.015	221.41	178.353	267.834	237.012
YGR260W	455.019	453.698	532.381	326.032	459.574	417.103
YGR261C	292.68	274.27	296.062	241.274	372.831	332.258
YGR262C	353.207	360.892	433.325	320.665	408.205	396.276
YGR263C	268.203	227.929	255.914	197.572	291.833	255.168
YGR264C	981.825	867.751	967.621	747.186	1105.84	910.351
YGR266W	369.805	355.896	390.377	306.192	445.505	396.76
YGR267C	644.134	599.926	723.184	528.056	765.494	675.767
YGR268C	672.655	693.07	843.129	665.65	828.287	769.331
YGR270W	416.473	373.232	398.106	331.388	506.543	441.243
YGR271W	255.594	235.177	251.564	206.326	313.093	280.788
YGR271C-A	422.92	339.771	353.302	249.969	429.843	323.975
YGR274C	284.723	265.647	277.708	231.761	357.436	303.075
YGR275W	294.891	299.219	364.406	297.893	398.168	352.977
YGR276C	277.754	256.677	288.578	206.318	308.723	272.609
YGR277C	317.173	309.237	353.155	295.083	388.051	357.09
YGR278W	398.022	365.869	389.932	288.288	470.409	376.995
YGR279C	1566.71	1578.51	2014.92	1548.33	1986.03	1725.82
YGR280C	620.417	531.509	598.197	402.89	579.401	454.12
YGR281W	325.811	311.386	340.979	279.426	426.916	378.406
YGR282C	1523.54	1497.59	1776.12	2135.61	2903.72	2560.87
YGR283C	744.735	639.943	765.797	928.742	1334.74	1110.29
YGR284C	539.859	475.839	537.084	398.325	629.302	531.247
YGR285C	1128.18	1038.18	1201.34	862.357	1205.63	947.735
YGR286C	344.605	351.538	423.326	213.172	286.135	270.966
YGR287C	184.055	182.301	208.838	133.763	200.32	183.098
YGR288W	204.664	213.246	243.581	211.201	284.847	272.479
YGR289C	192.929	186.414	207.566	188.784	288.808	279.499
YGR292W	307.186	286.532	314.947	233.425	347.547	314.103
YGR294W	215.721	221.314	261.711	147.984	207.175	188.306
YGR295C	680.721	587.778	644.118	562.777	887.294	795.582
YGR296W	421.427	435.893	494.969	354.393	492.309	452.57
YHL048W	266.424	235.164	252.489	246.863	377.648	284.345
YHL047C	255.122	248.93	284.472	223.474	327.284	269.944
YHL046C	113.922	130.601	142.705	95.0168	124.998	138.999
YHL043W	301.477	280.137	318.476	278.628	405.866	364.865
YHL040C	378.393	377.704	445.7	269.553	371.706	321.2
YHL039W	425.83	370.409	396.726	281.851	443.698	347.723
YHL038C	308.549	283.062	306.354	225.485	331.106	284.478
YHL036W	316.414	316.928	381.055	318.139	470.284	441.946
YHL035C	262.904	240.267	266.291	251.151	397.502	350.981
YHL034C	570.944	556.908	607.759	597.22	850.568	794.328
YHL033C	6270.78	5783.23	7540.38	5944.3	7824.65	6285.92
YHL032C	314.787	335.146	389.483	281.543	357.71	350.678
YHL031C	433.244	475.126	588.455	427.987	598.053	564.659
YHL030W	265.515	242.553	268.815	204.584	305.467	275.531
YHL028W	326.525	347.708	461.353	319.821	417.672	384.823
YHL027W	459	479.403	580.124	497.025	660.471	587.21
YHL025W	766.949	816.384	1007.88	735.247	995.027	884.269
YHL024W	246.007	243.658	272.853	309.425	457.261	459.555
YHL023C	276.746	247.747	274.89	214.627	316.997	287.002
YHL022C	184.973	170.069	183.264	112.801	174.482	170.252
YHL021C	319.56	304.253	326.786	458.569	691.765	765.176
YHL020C	602.372	632.24	828.425	759.279	983.963	886.417
YHL019C	268.706	259.451	304.04	251.675	367.054	332.389
YHL016C	259.896	251.1	268.944	237.296	344.567	324.499
YHL015W	4533.81	3938.36	4870.19	3998.3	5604.82	4641.6
YHL014C	687.143	569.503	617.202	412.968	689.85	538.616
YHL013C	394.357	329.592	391.166	278.3	417.337	339.919
YHL011C	999.316	904.065	1084.43	830.27	1162.99	922.405
YHL010C	261.504	229.664	248.517	203.195	332.108	307.806
YHL009C	258.943	239.052	271.195	240.121	361.226	305.279
YHL007C	638.784	613.095	687.479	492.127	696.672	580.438
YHL006C	629.412	637.511	847.037	580.798	736.281	620.252
YHL004W	509.956	500.384	563.797	402.048	580.424	510.335
YHL003C	510.258	455.81	517.023	371.08	584.814	512.006
YHL002W	581.922	551.742	635.197	514.384	752.672	651.025
YHL001W	2557.91	2235.85	2587.35	2122.45	3233.86	2614.61
YHR001W	399.662	348.543	410.292	333.976	522.159	450.53
YHR001W-A	701.58	570.044	715.218	622.867	937.993	893.01
YHR002W	392.387	345.648	372.106	295.108	467.486	419.45
YHR003C	537.848	497.819	558.288	385.247	561.824	484.481
YHR004C	317.822	287.902	342.266	244.689	350.066	314.333
YHR005C	772.873	676.166	799.435	688.578	987.567	831.684
YHR005C-A	2074.1	1676.98	2053.66	1456.5	2322.91	2033.36
YHR006W	559.93	534.038	600.705	703.522	1005.53	851.594
[truncated: 3,772 more rows]

## Sheet: Normalized occs._reps._avged.
Spike-in normalized Rpb1 occupancies
Gene	WT_SPK-averaged	s6e3_SPK-averaged		Gene
YAL068C	409.729	412.425		YAL068C
YAL067C	381.733	324.828		YAL067C
YAL064W	431.292	414.204		YAL064W
YAL063C	626.83	626.493		YAL063C
YAL062W	1137.19	1073.92		YAL062W
YAL060W	2036.46	2403.97		YAL060W
YAL059W	1601.43	1286.57		YAL059W
YAL058W	816.502	760.261		YAL058W
YAL056W	1051.87	1091.73		YAL056W
YAL055W	933.842	922.825		YAL055W
YAL054C	714.086	806.741		YAL054C
YAL053W	1281.65	2487.4		YAL053W
YAL051W	822.709	830.413		YAL051W
YAL049C	1194.81	1226.12		YAL049C
YAL048C	786.566	855.359		YAL048C
YAL047C	584.572	588.92		YAL047C
YAL046C	1057.4	1170.26		YAL046C
YAL044C	1392.45	1723.28		YAL044C
YAL043C	1409.9	1407.46		YAL043C
YAL042W	1960.17	1732.01		YAL042W
YAL041W	1465.46	1490.65		YAL041W
YAL040C	3918	4486.43		YAL040C
YAL039C	2153.86	2251.18		YAL039C
YAL038W	22005.3	18297.9		YAL038W
YAL036C	2214.59	1756.03		YAL036C
YAL035W	2618.66	2627.84		YAL035W
YAL034W-A	1083.88	1095.71		YAL034W-A
YAL034C	1058.08	1430.97		YAL034C
YAL033W	1346.03	1245.89		YAL033W
YAL032C	1396.38	1305.94		YAL032C
YAL031C	778.883	844.907		YAL031C
YAL030W	1472.41	1341.06		YAL030W
YAL029C	1156.43	1166.46		YAL029C
YAL028W	570.298	633.857		YAL028W
YAL027W	911.113	894.624		YAL027W
YAL026C	724.356	770.982		YAL026C
YAL025C	2658.03	2207.25		YAL025C
YAL024C	837.536	871.257		YAL024C
YAL023C	2504.77	2278.17		YAL023C
YAL022C	1225.72	1331.28		YAL022C
YAL021C	1433.35	1488.71		YAL021C
YAL020C	1295.32	1109.53		YAL020C
YAL019W	1159.4	1104.62		YAL019W
YAL017W	643.283	895.956		YAL017W
YAL016W	1492.26	1746.5		YAL016W
YAL015C	970.736	961.035		YAL015C
YAL014C	1612.21	1864.97		YAL014C
YAL013W	1416.45	1500.39		YAL013W
YAL012W	5270.33	4739.14		YAL012W
YAL011W	1166.53	1073.69		YAL011W
YAL010C	799.449	841.344		YAL010C
YAL009W	875.833	893.992		YAL009W
YAL008W	900.688	881.333		YAL008W
YAL007C	1495.01	1597.34		YAL007C
YAL005C	7966.14	7929.76		YAL005C
YAL003W	13102.1	11494.9		YAL003W
YAL002W	846.056	796.855		YAL002W
YAL001C	739.261	817.755		YAL001C
YAR002W	1639.92	1628.65		YAR002W
YAR002C-A	1749.28	1813.33		YAR002C-A
YAR003W	1212.71	1258.04		YAR003W
YAR007C	1212.96	1306.24		YAR007C
YAR008W	1035.43	976.604		YAR008W
YAR014C	1272.01	1408.51		YAR014C
YAR015W	1107.79	1325.66		YAR015W
YAR018C	964.73	1327.68		YAR018C
YAR019C	691.902	839.825		YAR019C
YAR020C	715.884	812.395		YAR020C
YAR027W	1018.63	1433.11		YAR027W
YAR031W	722.259	728.431		YAR031W
YAR033W	927.212	893.019		YAR033W
YAR035W	385.557	366.943		YAR035W
YAR042W	1157.52	1157.61		YAR042W
YAR050W	478.677	407.87		YAR050W
YAR071W	1705.96	1679.25		YAR071W
YBL108C-A	268.278	282.611		YBL108C-A
YBL106C	738.305	683.386		YBL106C
YBL105C	1188.33	1257.55		YBL105C
YBL103C	1086.76	1125.04		YBL103C
YBL102W	1233.17	1381.71		YBL102W
YBL101C	840.125	1013.91		YBL101C
YBL099W	3665.39	4280.81		YBL099W
YBL098W	631.936	584.666		YBL098W
YBL097W	1054.79	1074		YBL097W
YBL093C	1690.1	1495.92		YBL093C
YBL092W	11130.9	11326.9		YBL092W
YBL091C-A	3536.49	2810.53		YBL091C-A
YBL091C	1248.08	1227		YBL091C
YBL090W	1326.06	1298.58		YBL090W
YBL089W	1208.39	1114.73		YBL089W
YBL088C	736.565	716.691		YBL088C
YBL087C	6369.55	6159.53		YBL087C
YBL085W	1147.05	1273.75		YBL085W
YBL084C	955.97	1036.57		YBL084C
YBL082C	1204.82	1035.92		YBL082C
YBL080C	819.599	802.257		YBL080C
YBL079W	1397.54	1323.92		YBL079W
YBL078C	713.55	1110.17		YBL078C
YBL076C	3106.52	2886.13		YBL076C
YBL075C	934.178	942.616		YBL075C
YBL074C	1191.88	1225.52		YBL074C
YBL072C	9376.75	9750.55		YBL072C
YBL071W-A	2165.84	1660.21		YBL071W-A
YBL069W	1723.74	1441.43		YBL069W
YBL068W	1467.27	1239.43		YBL068W
YBL067C	978.693	908.228		YBL067C
YBL066C	1143.46	1321.82		YBL066C
YBL064C	963.015	1463.46		YBL064C
YBL063W	693.674	732.861		YBL063W
YBL061C	1423.52	1893.61		YBL061C
YBL060W	998.448	1146.58		YBL060W
YBL059C-A	1003.91	1033.79		YBL059C-A
YBL058W	1901.6	1928.48		YBL058W
YBL057C	1580.34	1408.99		YBL057C
YBL056W	2200.28	2187.59		YBL056W
YBL055C	1521.86	1362.2		YBL055C
YBL054W	1810.2	1497.38		YBL054W
YBL052C	814.964	837.667		YBL052C
YBL051C	1406.73	1528.68		YBL051C
YBL050W	1205.63	1422.08		YBL050W
YBL049W	1169.76	1274.2		YBL049W
YBL047C	1494.58	1717.63		YBL047C
YBL046W	1075.62	1066.66		YBL046W
YBL045C	2559.27	2921.37		YBL045C
YBL043W	538.917	949.245		YBL043W
YBL042C	2639.23	2441.88		YBL042C
YBL041W	2991.94	3116		YBL041W
YBL040C	1769.21	1814.8		YBL040C
YBL039C	2798.87	2094.32		YBL039C
YBL038W	1608.9	1836.76		YBL038W
YBL037W	949.938	1062.38		YBL037W
YBL036C	1319.29	1289.09		YBL036C
YBL035C	1189.5	1153.98		YBL035C
YBL034C	709.138	753.565		YBL034C
YBL033C	2019.88	1968.58		YBL033C
YBL032W	1554.62	1460.46		YBL032W
YBL031W	1404.47	1432.26		YBL031W
YBL030C	5950.88	6925.21		YBL030C
YBL028C	1653	1358.23		YBL028C
YBL027W	9632.7	9819.01		YBL027W
YBL026W	1614.41	1777.66		YBL026W
YBL025W	1398.48	1168.41		YBL025W
YBL024W	1786.32	1683.17		YBL024W
YBL023C	990.629	1101.14		YBL023C
YBL022C	1292.16	1372.03		YBL022C
YBL021C	1371.13	1212.28		YBL021C
YBL020W	1047.37	969.349		YBL020W
YBL019W	849.803	793.254		YBL019W
YBL018C	1504.2	1250.15		YBL018C
YBL017C	1303.47	1406.13		YBL017C
YBL016W	1839.51	2028.97		YBL016W
YBL015W	730.524	841.82		YBL015W
YBL014C	1117.19	1065.64		YBL014C
YBL013W	631.996	533.103		YBL013W
YBL011W	1478.8	1383.49		YBL011W
YBL009W	1173.02	1100.25		YBL009W
YBL008W	763.411	752.538		YBL008W
YBL007C	1468.25	1765.01		YBL007C
YBL006C	1976.4	1943.48		YBL006C
YBL005W	1957.88	1489.06		YBL005W
YBL004W	1488.07	1314.89		YBL004W
YBL003C	9722.59	7871.31		YBL003C
YBL002W	9530.94	8040.53		YBL002W
YBL001C	4396.9	3497		YBL001C
YBR001C	949.77	1149.15		YBR001C
YBR002C	2450.59	2354.34		YBR002C
YBR003W	1051.63	1220.01		YBR003W
YBR004C	964.37	1167.46		YBR004C
YBR005W	1216.12	1591.41		YBR005W
YBR006W	987.354	994.784		YBR006W
YBR008C	1398.53	1436.81		YBR008C
YBR009C	11796.9	9625.63		YBR009C
YBR010W	12739.7	10512.9		YBR010W
YBR011C	3643.81	3012.11		YBR011C
YBR014C	1090.13	1131.1		YBR014C
YBR015C	1767.12	1834.04		YBR015C
YBR016W	1819.99	2078.67		YBR016W
YBR017C	1375.36	1384.97		YBR017C
YBR018C	344.38	382.17		YBR018C
YBR019C	677.231	725.147		YBR019C
YBR020W	1154.35	1078.56		YBR020W
YBR021W	1443.51	1550.01		YBR021W
YBR022W	1289.02	1493		YBR022W
YBR023C	1427.18	2336.5		YBR023C
YBR024W	1235.54	912.188		YBR024W
YBR025C	4675.88	4430.37		YBR025C
YBR026C	739.854	885.702		YBR026C
YBR029C	2179.85	2064.12		YBR029C
YBR030W	1352.65	1193.28		YBR030W
YBR031W	10876.6	9814.74		YBR031W
YBR034C	3095.59	3024.33		YBR034C
YBR035C	2168.62	2330.27		YBR035C
YBR036C	1993.63	2117.26		YBR036C
YBR037C	1077.66	1088.04		YBR037C
YBR038W	1332.77	1614.69		YBR038W
YBR039W	2213.96	2428.64		YBR039W
YBR040W	277.571	290.104		YBR040W
YBR041W	979.548	1113.47		YBR041W
YBR042C	1056.34	1046.53		YBR042C
YBR043C	1267.68	1433.34		YBR043C
YBR044C	1154.26	1336.49		YBR044C
YBR045C	446.072	417.138		YBR045C
YBR046C	582.819	630.84		YBR046C
YBR048W	6870.69	7171.67		YBR048W
YBR049C	1454.28	1372.97		YBR049C
YBR050C	1031.55	982.674		YBR050C
YBR052C	1122.19	1653.18		YBR052C
YBR054W	1073.26	1389.66		YBR054W
YBR055C	838.981	833.011		YBR055C
YBR057C	1314.94	1345.48		YBR057C
YBR058C	940.203	970.304		YBR058C
YBR058C-A	1267.33	1364.81		YBR058C-A
YBR059C	972.538	1231.56		YBR059C
YBR060C	1069.37	998.884		YBR060C
YBR061C	1425.48	1292.07		YBR061C
YBR065C	812.433	907.208		YBR065C
YBR066C	1456.08	1444.73		YBR066C
YBR067C	2629.49	2471.72		YBR067C
YBR068C	8299.39	10278.3		YBR068C
YBR069C	5038.99	3848.02		YBR069C
YBR070C	1302.41	1367.13		YBR070C
YBR072W	820.724	1212.97		YBR072W
YBR073W	1190.07	1420.69		YBR073W
YBR076W	607.173	984.661		YBR076W
YBR077C	2405.97	3003.3		YBR077C
YBR078W	8435.13	8981.82		YBR078W
YBR079C	3246.99	3269.25		YBR079C
YBR080C	1066.78	1097		YBR080C
YBR081C	855.709	895.116		YBR081C
YBR082C	3804.56	3830.86		YBR082C
YBR083W	2298.82	2780.9		YBR083W
YBR084W	1917.65	1438.16		YBR084W
YBR084C-A	9088.29	9175.8		YBR084C-A
YBR085W	547.893	476.267		YBR085W
YBR086C	1760.93	1939.52		YBR086C
YBR087W	1578.25	1530.52		YBR087W
YBR088C	2488.85	2465.08		YBR088C
YBR089C-A	2648.27	2574.36		YBR089C-A
YBR091C	1911.65	2289.07		YBR091C
YBR092C	2925.06	3917.85		YBR092C
YBR093C	2774.53	3769.12		YBR093C
YBR094W	890.659	864.272		YBR094W
YBR095C	1062.7	1084.09		YBR095C
YBR097W	629.116	629.508		YBR097W
YBR098W	951.624	860.5		YBR098W
YBR101C	3423.51	3436.65		YBR101C
YBR102C	893.773	980.223		YBR102C
YBR103W	1081.28	1087.49		YBR103W
YBR104W	1329.59	1203.64		YBR104W
YBR105C	1047.73	1683.38		YBR105C
YBR106W	5586.6	4357.3		YBR106W
YBR107C	1492.82	1213.05		YBR107C
YBR108W	757.218	780.289		YBR108W
YBR109C	2287.92	2678.79		YBR109C
YBR110W	827.081	925.503		YBR110W
YBR111C	975.08	1214.64		YBR111C
YBR111W-A	1051.08	1103.8		YBR111W-A
YBR112C	2242.4	2227.94		YBR112C
YBR114W	801.43	831.287		YBR114W
YBR115C	1302.8	1181.7		YBR115C
YBR117C	1072.76	903.492		YBR117C
YBR118W	25070.3	26960.3		YBR118W
YBR119W	1512.73	1448.47		YBR119W
YBR120C	1206.32	1245.04		YBR120C
YBR121C	2376.2	2255.37		YBR121C
YBR122C	2147.82	1790.71		YBR122C
YBR123C	946.707	940.391		YBR123C
YBR125C	1269.93	1048.56		YBR125C
YBR126C	1501.29	2433.46		YBR126C
YBR127C	2303.72	2470.62		YBR127C
YBR128C	1065.85	1053.85		YBR128C
YBR129C	989.388	1051.34		YBR129C
YBR130C	1358.06	1435.51		YBR130C
YBR131W	661.076	634.888		YBR131W
YBR132C	653.953	1096.63		YBR132C
YBR133C	1504.37	1458.41		YBR133C
YBR135W	1660.67	1722.54		YBR135W
YBR136W	546.043	564.557		YBR136W
YBR137W	975.004	1159		YBR137W
YBR139W	898.214	1567.15		YBR139W
YBR140C	846.679	909.953		YBR140C
YBR142W	1246.81	1046.58		YBR142W
YBR143C	2954.82	2999.03		YBR143C
YBR145W	830.964	756.225		YBR145W
YBR146W	1352.08	1505.71		YBR146W
YBR147W	349.058	457.897		YBR147W
YBR148W	381.482	389.853		YBR148W
YBR149W	1236	1756.47		YBR149W
YBR150C	861.184	1030.69		YBR150C
YBR151W	1433.8	1639.18		YBR151W
YBR152W	1146.76	1041.29		YBR152W
YBR153W	2103.39	1909.84		YBR153W
YBR154C	2992.04	2805.16		YBR154C
YBR155W	1188.27	971.226		YBR155W
YBR156C	767.292	876.953		YBR156C
YBR157C	1706.58	1777.17		YBR157C
YBR158W	5042.28	6770.44		YBR158W
YBR159W	1322.19	1437.57		YBR159W
YBR160W	1574.38	2095.84		YBR160W
YBR161W	1125.85	1237.29		YBR161W
YBR162C	4530.73	4817.14		YBR162C
YBR162W-A	3060.72	3217.49		YBR162W-A
YBR163W	1095.02	1033.61		YBR163W
YBR164C	1327.52	1376.99		YBR164C
YBR165W	1254.97	1273.9		YBR165W
YBR166C	1166.74	1233.77		YBR166C
YBR167C	1576.27	1719.46		YBR167C
YBR168W	577.154	673.994		YBR168W
YBR169C	599.952	890.414		YBR169C
YBR170C	1190.13	1247.28		YBR170C
YBR171W	1468.17	1400.77		YBR171W
YBR172C	2529.7	2416.25		YBR172C
YBR173C	2681.51	2364.89		YBR173C
YBR175W	1352.86	1149.62		YBR175W
YBR176W	1090.34	937.045		YBR176W
YBR177C	1252.55	1303.33		YBR177C
YBR179C	836.694	838.429		YBR179C
YBR180W	597.124	455.75		YBR180W
YBR181C	8162.78	8645.32		YBR181C
YBR182C	711.803	638.383		YBR182C
YBR183W	867.485	1300.28		YBR183W
YBR185C	920.352	1014.73		YBR185C
YBR186W	816.746	611.802		YBR186W
YBR188C	1362.56	1171.02		YBR188C
YBR189W	9907.59	10066.3		YBR189W
YBR191W	9542.3	9780.77		YBR191W
YBR192W	1359.93	1212.47		YBR192W
YBR193C	1368.76	1257.47		YBR193C
YBR194W	1201.17	1199.76		YBR194W
YBR195C	1421.59	1248.32		YBR195C
YBR196C	6711.58	6929.45		YBR196C
YBR198C	1802.83	1621.2		YBR198C
YBR199W	1220.8	1508.64		YBR199W
YBR200W	793.582	898.733		YBR200W
YBR201W	844.786	959.252		YBR201W
YBR202W	1517.46	1688.02		YBR202W
YBR203W	672.924	999.268		YBR203W
YBR204C	596.831	691.59		YBR204C
YBR205W	1274.13	1221.9		YBR205W
YBR207W	1423.88	1450.46		YBR207W
YBR208C	873.442	849.838		YBR208C
YBR210W	1023.95	1043.5		YBR210W
YBR211C	1072.87	1215.46		YBR211C
YBR212W	917.452	1257.77		YBR212W
YBR213W	868.219	859.865		YBR213W
YBR214W	859.416	1140.3		YBR214W
YBR215W	889.172	867.402		YBR215W
YBR216C	843.384	903.486		YBR216C
YBR217W	823.032	896.136		YBR217W
YBR218C	1414.64	1442.43		YBR218C
YBR221C	1660.99	1730.93		YBR221C
YBR222C	992.481	1105.28		YBR222C
YBR223C	744.546	816.107		YBR223C
YBR227C	850.9	891.879		YBR227C
YBR228W	1033.5	1018.37		YBR228W
YBR229C	791.328	828.802		YBR229C
YBR230C	1175.41	1605.85		YBR230C
YBR231C	1328.34	1188.18		YBR231C
YBR233W	999.611	971.617		YBR233W
YBR233W-A	1193.36	1191.68		YBR233W-A
YBR234C	1373.02	1567.98		YBR234C
YBR236C	1094.8	1198.96		YBR236C
YBR237W	726.311	802.88		YBR237W
YBR238C	1255.65	831.621		YBR238C
YBR240C	581.058	596.269		YBR240C
YBR243C	1211.05	1142.9		YBR243C
YBR244W	1093.1	1024.53		YBR244W
YBR245C	1037.13	993.756		YBR245C
YBR247C	1831.65	1459.91		YBR247C
YBR248C	1942.73	1534.45		YBR248C
YBR249C	3514.22	2856.57		YBR249C
YBR250W	419.601	375.292		YBR250W
YBR251W	1324.22	1314.32		YBR251W
YBR252W	1888.42	1447.64		YBR252W
YBR253W	1889.18	1612.7		YBR253W
YBR254C	1284.17	1238.24		YBR254C
YBR255W	722.29	794.745		YBR255W
YBR256C	1403.58	1678.14		YBR256C
YBR257W	1181.65	1205.73		YBR257W
YBR258C	1298.1	1334.12		YBR258C
YBR260C	967.076	930.475		YBR260C
YBR261C	1605.4	1377.42		YBR261C
YBR262C	1880.74	1910.36		YBR262C
YBR263W	1752.79	1497.35		YBR263W
YBR264C	1290.44	1228.82		YBR264C
YBR265W	1993.31	1657.13		YBR265W
YBR267W	2282.51	1777.47		YBR267W
YBR268W	1624.57	1462.97		YBR268W
YBR272C	743.148	853.36		YBR272C
YBR273C	959.539	1009.68		YBR273C
YBR274W	686.532	708.373		YBR274W
YBR275C	716.202	706.277		YBR275C
YBR276C	826.296	882.567		YBR276C
YBR278W	1138.88	1108.8		YBR278W
YBR279W	1414.59	1495.96		YBR279W
YBR280C	665.286	707.56		YBR280C
YBR281C	780.491	788.99		YBR281C
YBR282W	1660.03	1730.64		YBR282W
YBR283C	2211.31	2195.08		YBR283C
YBR286W	2201.48	2633.41		YBR286W
YBR288C	1073.95	1420.65		YBR288C
YBR289W	1032.44	1071.45		YBR289W
YBR290W	1642.46	1828.29		YBR290W
YBR291C	1487.17	1625.75		YBR291C
YBR293W	1008.75	974.093		YBR293W
YBR294W	730.554	724.442		YBR294W
YBR295W	823.324	1152.82		YBR295W
YBR296C	514.428	1231.55		YBR296C
YBR297W	665.948	1136.08		YBR297W
YBR298C	791.232	1049.39		YBR298C
YBR299W	923.25	901.988		YBR299W
YBR301W	650.281	484.712		YBR301W
YBR302C	627.675	696.116		YBR302C
YCL069W	368.176	373.793		YCL069W
YCL064C	1168.61	952.501		YCL064C
YCL063W	1730.72	1633.26		YCL063W
YCL061C	858.835	847.571		YCL061C
YCL059C	1643.05	1408.35		YCL059C
YCL058C	2796.34	2585.12		YCL058C
YCL058W-A	2992.79	2733.34		YCL058W-A
YCL057W	1182.49	1206.64		YCL057W
YCL055W	2356	2352.39		YCL055W
YCL054W	1921.45	1717.83		YCL054W
YCL052C	969.045	1160.08		YCL052C
YCL051W	1051.86	1209.64		YCL051W
YCL050C	2072.64	1843.4		YCL050C
YCL048W	428.14	411.773		YCL048W
YCL045C	1303.92	1373.49		YCL045C
YCL044C	1657.55	1552.21		YCL044C
YCL043C	4582.5	4691.25		YCL043C
YCL040W	1050.9	3562.39		YCL040W
YCL039W	993.706	1036.08		YCL039W
YCL038C	680.387	973.536		YCL038C
YCL037C	5288.85	5268.45		YCL037C
YCL036W	2054.36	1433.38		YCL036W
YCL035C	1957.95	2456.82		YCL035C
YCL034W	1340.78	1492.24		YCL034W
YCL033C	1050.42	1105.08		YCL033C
YCL032W	1124.1	1142.56		YCL032W
YCL031C	2500.6	2427.32		YCL031C
YCL030C	1254.69	1510.7		YCL030C
YCL029C	1167.11	1177.21		YCL029C
YCL028W	1144.03	1184.69		YCL028W
YCL027W	581	602.974		YCL027W
YCL026C-A	622.298	560.141		YCL026C-A
YCL025C	2442.4	3079.37		YCL025C
YCL024W	766.564	825.63		YCL024W
YCL018W	3394.21	2989.27		YCL018W
YCL017C	1264.66	1327.94		YCL017C
YCL016C	988.247	981.979		YCL016C
YCL014W	838.82	997.007		YCL014W
YCL012C	974.946	1032.47		YCL012C
YCL011C	2962.72	2824.82		YCL011C
YCL010C	2908.34	2331.66		YCL010C
YCL009C	2813.05	2307.06		YCL009C
YCL008C	1531.07	1302.8		YCL008C
YCL005W-A	5280.27	4478.82		YCL005W-A
YCL005W	1415.23	1249.35		YCL005W
YCL004W	1086.04	1010.33		YCL004W
YCL001W	1526.63	1499.45		YCL001W
YCR002C	1356.52	1673.87		YCR002C
YCR003W	1195.22	1326.69		YCR003W
YCR004C	1105.12	1569.12		YCR004C
YCR005C	3708.58	4226.85		YCR005C
YCR008W	1474.81	1482.63		YCR008W
YCR009C	1421.39	1730.5		YCR009C
YCR010C	511.458	819.211		YCR010C
YCR011C	1120.44	1340.65		YCR011C
YCR012W	18823.7	16295.3		YCR012W
YCR014C	1282.43	1117.86		YCR014C
YCR017C	1070.93	1126.74		YCR017C
YCR018C	1590.02	1439.29		YCR018C
YCR019W	759.547	806.781		YCR019W
YCR020C	962.053	934.636		YCR020C
YCR020C-A	1021.08	1014.66		YCR020C-A
YCR020W-B	1093.43	1044.57		YCR020W-B
YCR021C	825.349	851.294		YCR021C
YCR023C	1257.86	1207.56		YCR023C
YCR024C	1159.61	1178.46		YCR024C
YCR024C-A	9624.34	11528.4		YCR024C-A
YCR026C	1282.43	1402.54		YCR026C
YCR027C	1072.02	1086.05		YCR027C
YCR028C	1106.2	1009.52		YCR028C
YCR028C-A	1583.33	1490.96		YCR028C-A
YCR030C	1147.24	1250.31		YCR030C
YCR031C	9412.06	9672.49		YCR031C
YCR032W	602.727	618.732		YCR032W
YCR033W	1462	1473.08		YCR033W
YCR034W	2527.66	2240.03		YCR034W
YCR035C	2131.58	1928.84		YCR035C
YCR036W	1447.11	2308.93		YCR036W
YCR037C	1666.81	1758.57		YCR037C
YCR038C	938.211	993.499		YCR038C
YCR039C	529.571	605.362		YCR039C
YCR040W	234.716	263.929		YCR040W
YCR042C	1228.56	1242.06		YCR042C
YCR044C	1884.88	1708.32		YCR044C
YCR045C	1270.66	1161.24		YCR045C
YCR046C	2537.78	2016.3		YCR046C
YCR047C	1716.75	1352.48		YCR047C
YCR048W	1071.69	916.917		YCR048W
YCR052W	1499.15	1483.43		YCR052W
YCR053W	2953.26	2859.63		YCR053W
YCR054C	1139.82	1001.22		YCR054C
YCR057C	2134.18	1732.91		YCR057C
YCR059C	1805.66	1382.9		YCR059C
YCR060W	1181.03	1120.83		YCR060W
YCR063W	2552.27	3110.91		YCR063W
YCR065W	2558.65	2789		YCR065W
YCR066W	888.138	890.268		YCR066W
YCR067C	1208.37	1241.91		YCR067C
YCR068W	1038.45	937.431		YCR068W
YCR069W	1410.14	1457.58		YCR069W
YCR071C	1735.98	1747.41		YCR071C
YCR072C	2005.16	1629.9		YCR072C
YCR073C	908.869	1029.19		YCR073C
YCR073W-A	1026.33	1059.45		YCR073W-A
YCR075C	867.814	827.11		YCR075C
YCR077C	1544.19	1609.86		YCR077C
YCR079W	1628.56	1533.54		YCR079W
YCR081W	675.89	697.093		YCR081W
YCR082W	1771.35	1855.55		YCR082W
YCR083W	1316.23	1239.87		YCR083W
YCR084C	2268.61	2248.05		YCR084C
YCR086W	1849.1	1514.76		YCR086W
YCR088W	1511.72	1570.22		YCR088W
YCR089W	803.673	844.93		YCR089W
YCR091W	507.953	665.638		YCR091W
YCR092C	833.319	844.842		YCR092C
YCR093W	1891.26	1927.42		YCR093W
YCR094W	761.868	845.709		YCR094W
YCR098C	835.779	1689.09		YCR098C
YCR104W	333.406	281.161		YCR104W
YCR105W	678.263	676.545		YCR105W
YCR106W	963.089	1023.37		YCR106W
YCR107W	1131.92	1363.74		YCR107W
YDL248W	552.672	685.513		YDL248W
YDL247W	624.916	812.338		YDL247W
YDL245C	510.199	730.895		YDL245C
YDL244W	537.5	577.951		YDL244W
YDL243C	549.479	505.956		YDL243C
YDL240W	916.735	1045.44		YDL240W
YDL239C	436.822	444.293		YDL239C
YDL238C	693.262	929.596		YDL238C
YDL237W	858.042	947.925		YDL237W
YDL236W	1700.73	1762.25		YDL236W
YDL235C	1741.24	2251.81		YDL235C
YDL234C	865.762	1071.51		YDL234C
YDL232W	2344.31	2126.9		YDL232W
YDL231C	1300.94	1341.13		YDL231C
YDL230W	832.526	891.519		YDL230W
YDL229W	10660.3	9555.46		YDL229W
YDL227C	1864.67	908.46		YDL227C
YDL226C	1629.64	1531.23		YDL226C
YDL225W	1107.67	1120.01		YDL225W
YDL224C	1668.01	1874.47		YDL224C
YDL223C	669.341	776.881		YDL223C
YDL222C	620.739	1122.22		YDL222C
YDL220C	755.727	854.875		YDL220C
YDL219W	903.669	776.338		YDL219W
YDL217C	1547.78	1498.18		YDL217C
YDL216C	778.061	806.581		YDL216C
YDL215C	1213.03	1428.41		YDL215C
YDL214C	538.411	630.555		YDL214C
YDL213C	1479.1	1544.32		YDL213C
YDL212W	1843.2	1951.09		YDL212W
YDL210W	523.041	486.923		YDL210W
YDL209C	1060.8	1048.82		YDL209C
YDL208W	4122.09	3640.18		YDL208W
YDL207W	1106.48	1251.66		YDL207W
YDL205C	1794.7	1752.68		YDL205C
YDL204W	1078.77	1651.19		YDL204W
YDL203C	937.367	967.919		YDL203C
YDL202W	1641.73	1463.65		YDL202W
YDL201W	1677.83	1361.27		YDL201W
YDL200C	988.877	992.043		YDL200C
YDL198C	2245.93	1976.83		YDL198C
YDL197C	1097.93	1141.62		YDL197C
YDL195W	1810.83	1926.73		YDL195W
YDL194W	473.244	541.785		YDL194W
YDL193W	1452.78	1336.94		YDL193W
YDL192W	4873.32	4943.36		YDL192W
YDL191W	7145.62	7324.42		YDL191W
YDL190C	1205.85	1214.17		YDL190C
YDL189W	1302.97	1189.15		YDL189W
YDL188C	1207.5	1215.03		YDL188C
YDL185W	2372.63	2580.69		YDL185W
YDL184C	13690.7	11884.6		YDL184C
YDL183C	654.234	609.148		YDL183C
YDL182W	4041.67	3375.76		YDL182W
YDL181W	2371.33	2584.83		YDL181W
YDL179W	2287.44	2578.93		YDL179W
YDL178W	1164.99	1199.39		YDL178W
YDL176W	865.957	901.863		YDL176W
YDL175C	1566.69	1534.96		YDL175C
YDL174C	1537.37	1495.43		YDL174C
YDL173W	1590.26	1599.63		YDL173W
YDL171C	1718.21	1478.84		YDL171C
YDL170W	743.005	723.125		YDL170W
YDL169C	454.774	543.217		YDL169C
YDL168W	1271.78	1228.36		YDL168W
YDL167C	1958.41	1661.14		YDL167C
YDL166C	2264.73	1770.67		YDL166C
YDL165W	1541.82	1475.86		YDL165W
YDL164C	980.034	958.025		YDL164C
YDL161W	2092.98	2007.57		YDL161W
YDL160C	1884.07	2272.14		YDL160C
YDL159W	1024.88	1071.33		YDL159W
YDL155W	1764.25	1840.42		YDL155W
YDL154W	650.783	601.471		YDL154W
YDL153C	1385.89	1182.69		YDL153C
YDL150W	1564.08	1416.74		YDL150W
YDL149W	609.656	598.921		YDL149W
YDL148C	1255.14	1191.76		YDL148C
YDL147W	2048.2	2332.62		YDL147W
YDL146W	799.406	903.909		YDL146W
YDL145C	1631.26	1689.6		YDL145C
YDL143W	2557.55	2310.57		YDL143W
YDL142C	1048.38	1060.07		YDL142C
YDL141W	1000.93	966.628		YDL141W
YDL140C	2658.95	2725.48		YDL140C
YDL139C	772.003	744.998		YDL139C
YDL138W	1591.01	1628.4		YDL138W
YDL137W	4454.91	3984.2		YDL137W
YDL136W	5878.43	6005.42		YDL136W
YDL135C	1606.84	1477.92		YDL135C
YDL134C	1989.78	2084.31		YDL134C
YDL133C-A	10838.2	11250		YDL133C-A
YDL132W	1111.51	1135.06		YDL132W
YDL131W	2766.66	2430.18		YDL131W
YDL130W-A	579.577	1448.85		YDL130W-A
YDL130W	10191	10569.8		YDL130W
YDL128W	2481.31	2272.28		YDL128W
YDL127W	1731.63	1650.82		YDL127W
YDL126C	2666.82	2972.93		YDL126C
YDL125C	3669.54	5777.04		YDL125C
YDL124W	1849.77	2974.7		YDL124W
YDL123W	1787.58	1974.16		YDL123W
YDL122W	1705.29	1655.84		YDL122W
YDL120W	1690.19	1848.64		YDL120W
YDL117W	1494.89	1843.44		YDL117W
YDL116W	1395.6	1410.97		YDL116W
YDL115C	923.27	976.537		YDL115C
YDL113C	691.776	888.78		YDL113C
YDL112W	1018.2	920.675		YDL112W
YDL111C	2064.52	1851.79		YDL111C
YDL110C	1692.51	2673.86		YDL110C
YDL108W	1018.07	1012.23		YDL108W
YDL107W	852.468	893.686		YDL107W
YDL106C	1050.55	1184.54		YDL106C
YDL105W	1154.7	1041.2		YDL105W
YDL104C	1215.21	1068.5		YDL104C
YDL103C	840.228	862.144		YDL103C
YDL102W	803.241	789.711		YDL102W
YDL101C	965.471	1058.86		YDL101C
YDL100C	1908.85	1957.19		YDL100C
YDL099W	1060.42	1088.73		YDL099W
YDL098C	880.618	752.801		YDL098C
YDL097C	2317.33	2386.8		YDL097C
YDL095W	2421.36	2161.71		YDL095W
YDL093W	752.479	682.173		YDL093W
YDL092W	1473.17	1625.86		YDL092W
YDL091C	815.033	838.444		YDL091C
YDL090C	806.923	779.923		YDL090C
YDL089W	736.159	755.721		YDL089W
YDL088C	1524.58	1547.71		YDL088C
YDL087C	1123.63	1053.32		YDL087C
YDL085W	893.973	1063.78		YDL085W
YDL084W	2658.28	2565.12		YDL084W
YDL083C	8024.39	8064.53		YDL083C
YDL082W	6396.34	5746.03		YDL082W
YDL081C	8743.39	8666.86		YDL081C
YDL080C	1427.05	1289.77		YDL080C
YDL079C	878.135	965.87		YDL079C
YDL078C	1059.08	1215.39		YDL078C
YDL077C	618.068	661.14		YDL077C
YDL076C	1140.2	1344.44		YDL076C
YDL075W	8419.85	8579.13		YDL075W
YDL074C	1709.83	1639.26		YDL074C
YDL072C	1841.58	2953.55		YDL072C
YDL070W	3685.86	3244.76		YDL070W
YDL069C	1773.49	1453.77		YDL069C
YDL067C	2906.42	3118.2		YDL067C
YDL066W	1768.47	1781.36		YDL066W
YDL065C	1308.39	1264.93		YDL065C
YDL064W	1426.96	1284.95		YDL064W
YDL063C	1596.35	1311.69		YDL063C
YDL061C	7516.98	8112.42		YDL061C
YDL060W	1632.55	1433.9		YDL060W
YDL059C	891.51	774.266		YDL059C
YDL058W	774.517	780.829		YDL058W
YDL056W	1447.34	1588.41		YDL056W
YDL055C	11776.8	14346.2		YDL055C
YDL054C	662.102	705.058		YDL054C
YDL053C	1384.16	1403.75		YDL053C
YDL052C	2222.71	2099.75		YDL052C
YDL051W	2591.26	2434.47		YDL051W
YDL049C	1343.71	1231.05		YDL049C
YDL048C	1002.81	1053.83		YDL048C
YDL047W	2189.73	2230.11		YDL047W
YDL046W	2606.15	2698.03		YDL046W
YDL045W-A	1625.06	1711.61		YDL045W-A
YDL045C	1039.9	1144.26		YDL045C
YDL044C	1157.43	1141.96		YDL044C
YDL043C	1178.75	1195.31		YDL043C
YDL042C	1095.19	874.101		YDL042C
YDL040C	1152.85	1120.36		YDL040C
YDL039C	539.937	567.582		YDL039C
YDL037C	388.974	356.856		YDL037C
YDL036C	1508.97	1200.72		YDL036C
YDL035C	996.404	1129.74		YDL035C
YDL033C	2270.91	2323.17		YDL033C
YDL031W	1220.58	1132.78		YDL031W
YDL030W	926.706	821.425		YDL030W
YDL029W	1518.35	1716.76		YDL029W
YDL028C	1030.48	1154.18		YDL028C
YDL025C	818.166	1018.44		YDL025C
YDL024C	397.17	391.901		YDL024C
YDL022W	1829.41	3017.27		YDL022W
YDL021W	762.099	1029.31		YDL021W
YDL020C	3094.29	3542.18		YDL020C
YDL019C	801.556	829.308		YDL019C
YDL018C	1031.76	1139.61		YDL018C
YDL017W	868.836	889.65		YDL017W
YDL015C	1602.46	1706.76		YDL015C
YDL014W	6478.91	5734.58		YDL014W
YDL013W	1253.64	1295.58		YDL013W
YDL012C	2374.76	2212.79		YDL012C
YDL010W	1292.52	1366.23		YDL010W
YDL008W	2749.26	1767.55		YDL008W
YDL007W	1901.45	2074.44		YDL007W
YDL006W	1488.97	1449.58		YDL006W
YDL005C	1231.62	1255.27		YDL005C
YDL004W	2124.74	2487.69		YDL004W
YDL003W	1934.14	1974.36		YDL003W
YDL002C	1302.16	1313.08		YDL002C
YDL001W	1045.21	1003.31		YDL001W
YDR001C	1069.14	2131.86		YDR001C
YDR002W	2871.62	3205.55		YDR002W
YDR003W	1498.29	1637.9		YDR003W
YDR004W	1432.36	1390.58		YDR004W
YDR005C	1221.15	1321.07		YDR005C
YDR006C	1657.55	1802.75		YDR006C
YDR007W	1863.63	2110.6		YDR007W
YDR009W	623.746	622.268		YDR009W
YDR011W	3011.77	3357.21		YDR011W
YDR012W	10866.3	9950.01		YDR012W
YDR013W	1877.62	1743.48		YDR013W
YDR014W	619.801	622.758		YDR014W
YDR014W-A	655.805	727.601		YDR014W-A
YDR016C	1238.92	1323.12		YDR016C
YDR017C	1592.33	1695.06		YDR017C
YDR019C	836.439	1126.63		YDR019C
YDR021W	1047.63	868.655		YDR021W
YDR022C	1059.88	897.442		YDR022C
YDR023W	2993.18	3083.86		YDR023W
YDR025W	9470.16	9786.76		YDR025W
YDR026C	1504.93	1449.98		YDR026C
YDR027C	986.179	1045.1		YDR027C
YDR028C	1319.04	1614.13		YDR028C
YDR030C	938.525	917.584		YDR030C
YDR031W	652.138	894.721		YDR031W
YDR032C	1128.36	1713.14		YDR032C
YDR033W	8672.75	10115.9		YDR033W
YDR034C	1435.15	1454.31		YDR034C
YDR035W	1643	1831.06		YDR035W
YDR036C	1111.77	1036.62		YDR036C
YDR037W	4122.73	3608.67		YDR037W
YDR038C	1348.32	1692.91		YDR038C
YDR039C	1306.12	1808.62		YDR039C
YDR040C	1297.58	2016.09		YDR040C
YDR041W	1344.87	1851.98		YDR041W
YDR043C	1897.7	1864.6		YDR043C
YDR044W	1069.34	938.399		YDR044W
YDR045C	1885.8	1772.99		YDR045C
YDR046C	3097.85	3183.13		YDR046C
YDR047W	2415.44	2006.99		YDR047W
YDR050C	16253.6	14039.2		YDR050C
YDR051C	1417.9	1321.5		YDR051C
YDR052C	1499.19	1431.99		YDR052C
YDR054C	2008.49	2289.97		YDR054C
YDR055W	2361.93	4967.65		YDR055W
YDR057W	785.127	835.793		YDR057W
YDR058C	553.128	592.264		YDR058C
YDR059C	694.311	964.214		YDR059C
YDR060W	2045.15	1758.29		YDR060W
YDR062W	1730.33	1603.26		YDR062W
YDR063W	1870.15	1890.75		YDR063W
YDR064W	13676.1	14162.7		YDR064W
YDR065W	1394.87	1228.58		YDR065W
YDR068W	963.37	1042.24		YDR068W
YDR069C	720.133	769.988		YDR069C
YDR071C	1650.78	1890.14		YDR071C
YDR072C	2246.44	2493.73		YDR072C
YDR073W	2825.08	3271.01		YDR073W
YDR074W	1119.99	2296.98		YDR074W
YDR075W	1135.56	1142.63		YDR075W
YDR076W	1082.23	1660.08		YDR076W
YDR077W	8482.07	27502.8		YDR077W
YDR078C	2090.38	5110.58		YDR078C
YDR079W	893.274	944.198		YDR079W
YDR079C-A	1440.82	1413.78		YDR079C-A
YDR080W	582.651	613.754		YDR080W
YDR081C	978.462	976.296		YDR081C
YDR082W	1006.78	995.435		YDR082W
YDR083W	1274.65	1164.62		YDR083W
YDR084C	966.859	1037.27		YDR084C
YDR085C	635.166	1198.6		YDR085C
YDR086C	2615.3	3273.76		YDR086C
YDR087C	2054.75	1756.69		YDR087C
YDR088C	856.481	869.741		YDR088C
YDR091C	2345.95	2151.34		YDR091C
YDR092W	1994.96	1577.25		YDR092W
YDR093W	1222.07	1064.81		YDR093W
YDR096W	877.075	1021.14		YDR096W
YDR097C	813.253	794.174		YDR097C
YDR098C	1460.94	1384.76		YDR098C
YDR099W	2032.16	2563.12		YDR099W
YDR100W	1058.04	1262.62		YDR100W
YDR101C	2295.88	1906.69		YDR101C
YDR103W	1109.37	1104.27		YDR103W
YDR104C	589.777	638.845		YDR104C
YDR105C	851.403	948.853		YDR105C
YDR106W	743.132	957.884		YDR106W
YDR107C	1693.97	2197.2		YDR107C
YDR108W	757.935	804.572		YDR108W
YDR110W	1168.72	986.963		YDR110W
YDR113C	1170.54	1213.11		YDR113C
YDR116C	1258.75	1326.38		YDR116C
YDR117C	849.426	1000.93		YDR117C
YDR118W	942.981	933.993		YDR118W
YDR120C	1488.48	1264.64		YDR120C
YDR121W	1205.92	1088.94		YDR121W
YDR122W	976.927	1248.71		YDR122W
YDR123C	1324.2	1178.53		YDR123C
YDR125C	524.939	564.429		YDR125C
YDR126W	1999.05	1730.47		YDR126W
YDR127W	1901.11	1786.29		YDR127W
YDR128W	844.39	812.493		YDR128W
YDR129C	1546.96	1812.2		YDR129C
YDR130C	1209.28	1362.06		YDR130C
YDR135C	1246.62	1471.43		YDR135C
YDR137W	803.425	880.027		YDR137W
YDR138W	1027.01	1021.72		YDR138W
YDR139C	1397.76	1410.19		YDR139C
YDR140W	1459.43	1358.42		YDR140W
YDR141C	877.596	953.604		YDR141C
YDR142C	933.088	921.941		YDR142C
YDR143C	1872.8	1686.28		YDR143C
YDR144C	1830.76	1456.73		YDR144C
YDR145W	1483.38	1580.21		YDR145W
YDR146C	1231.06	1707.65		YDR146C
YDR147W	1025.81	1080.76		YDR147W
YDR148C	1257.71	1466.47		YDR148C
YDR150W	860.476	960.769		YDR150W
YDR151C	2129.47	2085.98		YDR151C
YDR152W	2293.4	2275.12		YDR152W
YDR153C	2160.93	2180.26		YDR153C
YDR155C	8271.4	6198.68		YDR155C
YDR156W	4385.82	3708.19		YDR156W
YDR158W	2856.66	2343.6		YDR158W
YDR159W	812.542	843.966		YDR159W
YDR160W	737.366	784.118		YDR160W
YDR162C	1273.67	1340.1		YDR162C
YDR163W	1249.62	1306.45		YDR163W
YDR164C	774.91	809.38		YDR164C
YDR165W	1807.03	1557.07		YDR165W
YDR166C	865.49	872.159		YDR166C
YDR167W	1601.5	1595.4		YDR167W
YDR168W	1056.41	1128.02		YDR168W
YDR169C	1012.24	1130.81		YDR169C
YDR170C	1028.98	1079.37		YDR170C
YDR171W	865.337	1529.34		YDR171W
YDR172W	3130.78	3089.72		YDR172W
YDR173C	1484.24	1389.24		YDR173C
YDR174W	4735.91	4732.27		YDR174W
YDR175C	1328.31	1313.22		YDR175C
YDR176W	1253.21	1142.31		YDR176W
YDR177W	2028.69	2082.34		YDR177W
YDR178W	1094.02	1408.62		YDR178W
YDR179C	601.373	623.534		YDR179C
YDR180W	649.442	611.562		YDR180W
YDR181C	791.819	915.928		YDR181C
YDR182W	948.014	1104.42		YDR182W
YDR183W	1020.72	978.316		YDR183W
YDR184C	1498.59	1243.59		YDR184C
YDR185C	1729.82	1105.59		YDR185C
YDR186C	1763.84	1816.47		YDR186C
YDR188W	3185.46	2994.98		YDR188W
YDR189W	1258.37	1198.73		YDR189W
YDR190C	2222.66	2358.29		YDR190C
YDR191W	752.802	875.961		YDR191W
YDR192C	859.049	861.759		YDR192C
YDR194C	1705.3	1666.64		YDR194C
YDR195W	1447.67	1354.77		YDR195W
YDR196C	934.916	1122.7		YDR196C
YDR197W	897.937	979.95		YDR197W
YDR198C	957.566	827.397		YDR198C
YDR200C	701.077	765.635		YDR200C
YDR201W	875.577	987.878		YDR201W
YDR202C	782.551	858.701		YDR202C
YDR204W	872.914	841.53		YDR204W
YDR205W	965.65	943.867		YDR205W
YDR206W	1214.35	1158.22		YDR206W
YDR207C	841.078	779.698		YDR207C
YDR208W	1718.26	1953.52		YDR208W
YDR211W	1665.22	1651.44		YDR211W
YDR212W	1920.36	1848.78		YDR212W
YDR213W	1269.79	1205.53		YDR213W
YDR214W	2792.23	3231.07		YDR214W
YDR216W	552.833	1258.98		YDR216W
YDR217C	768.691	756.4		YDR217C
YDR218C	373.613	408.876		YDR218C
YDR219C	988.945	1196.13		YDR219C
YDR221W	1413.71	1279.88		YDR221W
YDR223W	798.615	1016.5		YDR223W
YDR224C	12336.1	8701.08		YDR224C
YDR225W	13786.1	9833.36		YDR225W
YDR226W	3595.82	2783.89		YDR226W
YDR227W	758.061	779.496		YDR227W
YDR228C	1308.02	1163.02		YDR228C
YDR229W	1190.4	1230.05		YDR229W
YDR231C	1193.97	1424.71		YDR231C
YDR232W	2439.93	2170.12		YDR232W
YDR233C	5540.3	5300.32		YDR233C
YDR234W	1828.48	1562.81		YDR234W
YDR235W	940.977	855.96		YDR235W
YDR236C	1275.75	1199.74		YDR236C
YDR237W	1237.79	1167.37		YDR237W
YDR238C	1839.43	1823.87		YDR238C
YDR239C	837.748	781.993		YDR239C
YDR240C	958.516	862.992		YDR240C
YDR242W	1154.74	1375.89		YDR242W
YDR243C	922.339	976.72		YDR243C
YDR244W	852.619	881.222		YDR244W
YDR245W	1969.03	2012.35		YDR245W
YDR246W	1578.38	1804.44		YDR246W
YDR247W	923.323	1490.41		YDR247W
YDR251W	1049.91	1370.83		YDR251W
YDR252W	949.897	902.315		YDR252W
YDR253C	1159.63	1093.73		YDR253C
YDR254W	901.508	1079.39		YDR254W
YDR255C	909.513	1149.93		YDR255C
YDR256C	1485	1261.55		YDR256C
YDR257C	1180.26	1129.74		YDR257C
YDR258C	1025.58	1614.44		YDR258C
YDR259C	688.114	787.905		YDR259C
YDR260C	1801.12	2155.84		YDR260C
YDR261C	1435.37	1617.87		YDR261C
YDR263C	649.337	665.69		YDR263C
YDR264C	1418.32	1483.56		YDR264C
YDR265W	1147.76	1179.74		YDR265W
YDR266C	1373.38	1363.03		YDR266C
YDR267C	1281.12	1224.17		YDR267C
YDR268W	1663.79	1181.71		YDR268W
YDR270W	1148.15	892.192		YDR270W
YDR272W	1064.33	1236.04		YDR272W
YDR273W	774.738	763.018		YDR273W
YDR275W	2309.75	1864.84		YDR275W
YDR276C	4646.44	5775.5		YDR276C
YDR277C	1041.44	1860.81		YDR277C
YDR279W	1010.44	878.826		YDR279W
YDR280W	2284.14	1995.42		YDR280W
YDR281C	2168.82	1372.79		YDR281C
YDR283C	808.641	837.758		YDR283C
YDR284C	1703.47	1559.81		YDR284C
YDR285W	518.452	480.476		YDR285W
YDR287W	734.959	847.169		YDR287W
YDR288W	1072.23	1065.18		YDR288W
YDR289C	1041.15	1041.97		YDR289C
YDR292C	1110.13	1093.25		YDR292C
YDR293C	1372.01	1894.17		YDR293C
YDR294C	1288.81	1530.23		YDR294C
YDR295C	951.292	876.25		YDR295C
YDR296W	1956.17	2013.34		YDR296W
YDR297W	1414.98	1577.8		YDR297W
YDR298C	2200.25	2587.04		YDR298C
YDR299W	1989.3	1621.47		YDR299W
YDR300C	1749.66	1414.56		YDR300C
YDR301W	909.405	925.412		YDR301W
YDR302W	905.6	1055.37		YDR302W
YDR303C	988.612	1000.57		YDR303C
YDR304C	1599.42	1680.09		YDR304C
YDR305C	1531.06	1434.47		YDR305C
YDR308C	1421.36	1536.75		YDR308C
YDR309C	2711.19	3298.02		YDR309C
YDR310C	1449.68	1349.84		YDR310C
YDR311W	1096.04	1187.46		YDR311W
YDR312W	1079.34	1096.84		YDR312W
YDR313C	1261.24	1340.74		YDR313C
YDR314C	920.216	1029.34		YDR314C
YDR315C	808.974	897.128		YDR315C
YDR316W	830.879	962.796		YDR316W
YDR317W	659.831	649.654		YDR317W
YDR318W	1214.71	1214.76		YDR318W
YDR320C	997.418	1057.52		YDR320C
YDR320C-A	1620.84	1731.33		YDR320C-A
YDR321W	1564.84	1350.24		YDR321W
YDR322W	1172.92	1235.41		YDR322W
YDR322C-A	1913.92	2087.92		YDR322C-A
YDR323C	800.809	809.404		YDR323C
YDR324C	1816.36	1534.17		YDR324C
YDR325W	881.182	908.332		YDR325W
YDR326C	1037.2	1129.51		YDR326C
YDR328C	1499.57	1555.28		YDR328C
YDR329C	873.605	919.315		YDR329C
YDR330W	815.79	809.841		YDR330W
YDR331W	1440.17	1376.41		YDR331W
YDR332W	858.353	804.339		YDR332W
YDR334W	1366.59	1263.1		YDR334W
YDR335W	1072.4	1184.83		YDR335W
YDR337W	1197.38	1203.58		YDR337W
YDR339C	2005.46	2132.46		YDR339C
YDR341C	1976.02	1740.71		YDR341C
YDR342C	1118.97	4398.33		YDR342C
YDR343C	961.139	3802.82		YDR343C
YDR345C	4910.42	1964.07		YDR345C
YDR346C	2311.55	2193.18		YDR346C
YDR347W	1691.57	1587.58		YDR347W
YDR349C	1659.99	1769.46		YDR349C
YDR350C	914.417	1152.7		YDR350C
YDR351W	1248.88	1710.99		YDR351W
YDR353W	3132.91	3090.12		YDR353W
YDR354W	1493.91	1440.33		YDR354W
YDR356W	736.893	787.288		YDR356W
YDR358W	730.617	920.929		YDR358W
YDR359C	1342.69	1465.39		YDR359C
YDR361C	1835.54	1439.86		YDR361C
YDR362C	899.886	913.838		YDR362C
YDR363W	825.727	874.271		YDR363W
YDR363W-A	2272.76	2227.2		YDR363W-A
YDR364C	1294.99	1228.05		YDR364C
YDR365C	1514.44	1389.16		YDR365C
YDR367W	1017.98	949.98		YDR367W
YDR368W	1124.45	968.786		YDR368W
YDR369C	620.693	565.639		YDR369C
YDR372C	1319.47	1400.46		YDR372C
YDR373W	911.036	1107.11		YDR373W
YDR375C	1035.16	1126.63		YDR375C
YDR376W	910.356	949.85		YDR376W
YDR377W	2809	2822.01		YDR377W
YDR378C	2930.33	2576.28		YDR378C
YDR379W	773.095	970.319		YDR379W
YDR379C-A	869.501	1365.44		YDR379C-A
YDR380W	1770.2	2309.29		YDR380W
YDR381W	8037.07	8614.67		YDR381W
YDR381C-A	2730.42	2605.64		YDR381C-A
YDR382W	11455.5	11830.8		YDR382W
YDR383C	3032.3	2946.18		YDR383C
YDR384C	1729.28	1455.8		YDR384C
YDR385W	8364.9	7553.28		YDR385W
YDR386W	805.869	809.422		YDR386W
YDR388W	1302.26	1517.85		YDR388W
YDR389W	1394.45	1389.06		YDR389W
YDR390C	1057.75	1066.8		YDR390C
YDR392W	1030.41	1032.33		YDR392W
YDR393W	1741.77	1711.63		YDR393W
YDR394W	2309.33	2293.03		YDR394W
YDR395W	1845.04	1575.54		YDR395W
YDR397C	2034.57	1684.53		YDR397C
YDR398W	2390.36	1880.26		YDR398W
YDR399W	4913.96	4739.26		YDR399W
YDR400W	1121.48	1092.7		YDR400W
YDR402C	447.893	433.708		YDR402C
YDR403W	458.877	420.203		YDR403W
YDR404C	1846.03	2157.92		YDR404C
YDR405W	1800.57	1729.65		YDR405W
YDR406W	635.221	676.289		YDR406W
YDR407C	897.452	964.848		YDR407C
YDR408C	2200.29	2246.73		YDR408C
YDR409W	1105.07	986.17		YDR409W
YDR410C	1787.76	1667.43		YDR410C
YDR411C	1582.71	1752.42		YDR411C
YDR412W	1452.4	1268.55		YDR412W
YDR414C	1126.22	993.376		YDR414C
YDR416W	1502.71	1327.22		YDR416W
YDR418W	10179.4	10617.6		YDR418W
YDR419W	688.783	687.671		YDR419W
YDR420W	1335.31	1695.37		YDR420W
YDR421W	687.705	770.924		YDR421W
YDR422C	1198.98	1150.82		YDR422C
YDR423C	1491.89	1436.28		YDR423C
YDR424C	2188.54	2235.82		YDR424C
YDR425W	763.194	794.053		YDR425W
YDR427W	1796.59	1889.2		YDR427W
YDR428C	1841.88	1462.99		YDR428C
YDR429C	3302.76	3075.28		YDR429C
YDR430C	1057.84	1147.16		YDR430C
YDR432W	5176.81	5600.85		YDR432W
YDR434W	942.63	1074.31		YDR434W
YDR435C	754.495	842.83		YDR435C
YDR436W	856.067	895.904		YDR436W
YDR437W	1187.36	1184.37		YDR437W
YDR438W	1223.3	1276.92		YDR438W
YDR439W	1062.78	1018.46		YDR439W
YDR440W	978.685	843.462		YDR440W
YDR441C	2831.24	1981.46		YDR441C
YDR443C	645.932	659.654		YDR443C
YDR446W	1058.12	892.547		YDR446W
YDR447C	7882.68	8367.19		YDR447C
YDR448W	1645.75	1505.1		YDR448W
YDR449C	1931.45	1589.62		YDR449C
YDR450W	7489.71	7751.13		YDR450W
YDR451C	2414.39	2927.58		YDR451C
YDR452W	1394.73	1157.74		YDR452W
YDR453C	944.084	698.312		YDR453C
YDR454C	1705.75	1442.17		YDR454C
YDR456W	1080.06	1030.35		YDR456W
YDR457W	1011.73	1049.09		YDR457W
YDR458C	977.535	1086.27		YDR458C
YDR459C	1132.33	1184.69		YDR459C
YDR460W	1667.08	1846.7		YDR460W
YDR461W	3514.53	4241.73		YDR461W
YDR462W	1891	2033.57		YDR462W
YDR463W	1632.04	1644.87		YDR463W
YDR464W	869.817	868.107		YDR464W
YDR465C	1420.17	1114.82		YDR465C
YDR466W	1103.54	1100.1		YDR466W
YDR468C	1739.97	1759.25		YDR468C
YDR469W	1210.68	1247.82		YDR469W
YDR470C	1004.29	1008.81		YDR470C
YDR471W	8403.81	8349.9		YDR471W
YDR472W	1975.84	1705.12		YDR472W
YDR473C	804.507	748.462		YDR473C
YDR475C	1194.79	1042.14		YDR475C
YDR477W	1278.65	1346.39		YDR477W
YDR478W	1187.87	1136.73		YDR478W
YDR479C	1478.29	1460.26		YDR479C
YDR480W	1113.54	1117.44		YDR480W
YDR481C	1702.66	2111.01		YDR481C
YDR482C	1010.97	931.987		YDR482C
YDR483W	1713.15	2088.73		YDR483W
YDR484W	697.74	704.728		YDR484W
YDR485C	914.93	1003.04		YDR485C
YDR486C	1338.13	1530.66		YDR486C
YDR487C	1786.81	1960.93		YDR487C
YDR488C	723.507	649.275		YDR488C
YDR489W	1497.51	1389.35		YDR489W
YDR490C	960.747	895.138		YDR490C
YDR492W	1774.97	1505.19		YDR492W
YDR493W	1591.52	1593.06		YDR493W
YDR494W	1176.67	1261.07		YDR494W
YDR495C	647.465	645.997		YDR495C
YDR496C	2119.39	1799.24		YDR496C
YDR497C	3053.55	3145.53		YDR497C
YDR498C	1129.22	1355.52		YDR498C
YDR499W	1282.68	1215.62		YDR499W
YDR500C	7947.37	8648.84		YDR500C
YDR501W	987.404	886.428		YDR501W
YDR502C	3817.22	3712.72		YDR502C
YDR503C	1361.42	1473.13		YDR503C
YDR504C	658.675	636.258		YDR504C
YDR505C	1041.37	1167.08		YDR505C
YDR507C	1297.75	1429.04		YDR507C
YDR508C	4910.46	4148.7		YDR508C
YDR510W	2640.11	2593.57		YDR510W
YDR511W	1810.03	1919.62		YDR511W
YDR512C	1098.96	1224.99		YDR512C
YDR513W	1308.52	1719.38		YDR513W
YDR515W	737.105	679.46		YDR515W
YDR516C	864.583	1138.46		YDR516C
YDR517W	1663.21	1500.82		YDR517W
YDR518W	788.271	784.26		YDR518W
YDR519W	1585.35	1601.19		YDR519W
YDR522C	459.725	512.827		YDR522C
YDR523C	392.169	366.123		YDR523C
YDR524C	1646.67	1684.52		YDR524C
YDR525W-A	1931.82	2515.55		YDR525W-A
YDR527W	2314.6	1845.26		YDR527W
YDR528W	2085.59	1839.66		YDR528W
YDR529C	2974.41	3290.3		YDR529C
YDR530C	1390.53	1493.29		YDR530C
YDR531W	1066.25	1050.74		YDR531W
YDR532C	721.79	804.11		YDR532C
YDR533C	1047.88	872.913		YDR533C
YDR534C	478.074	474.145		YDR534C
YDR536W	710.606	866.352		YDR536W
YDR538W	1308.8	1250.01		YDR538W
YDR539W	986.026	914.781		YDR539W
YDR540C	442.923	403.586		YDR540C
YDR542W	342.455	352.356		YDR542W
YDR545W	1358.87	1284.31		YDR545W
YEL072W	1156.99	1387.17		YEL072W
YEL071W	3297.73	3291.43		YEL071W
YEL069C	626.02	675.496		YEL069C
YEL066W	986.449	996.68		YEL066W
YEL065W	1449.58	1525.25		YEL065W
YEL064C	797.256	839.399		YEL064C
YEL063C	2218.63	2483.44		YEL063C
YEL062W	822.601	891.103		YEL062W
YEL061C	965.638	1017.49		YEL061C
YEL060C	1711.9	2454.13		YEL060C
YEL059C-A	1052.12	1587.67		YEL059C-A
YEL058W	1673.92	2122.39		YEL058W
YEL056W	1751.49	1472.43		YEL056W
YEL055C	1637.7	1351.28		YEL055C
YEL054C	9811.23	10036.8		YEL054C
YEL053C	857.171	824.628		YEL053C
YEL052W	893.486	887.265		YEL052W
YEL051W	2260.71	1956.58		YEL051W
YEL050C	1470.11	1435.61		YEL050C
YEL049W	1064.16	931.94		YEL049W
YEL048C	1101.7	928.911		YEL048C
YEL047C	1289.1	1080.88		YEL047C
YEL046C	13159.5	9486.78		YEL046C
YEL044W	2623.78	1638.07		YEL044W
YEL043W	1265.39	1149.56		YEL043W
YEL042W	1790.91	1593.86		YEL042W
YEL041W	677.336	847.753		YEL041W
YEL040W	7953.9	7531.68		YEL040W
YEL039C	2930.03	3184.68		YEL039C
YEL038W	1090.45	984.58		YEL038W
YEL037C	2156.27	1862.06		YEL037C
YEL036C	2105.54	2304.67		YEL036C
YEL034W	29899.5	26882.6		YEL034W
YEL032W	1615.01	1619.08		YEL032W
YEL031W	1934.28	1947		YEL031W
YEL030W	822.413	686.356		YEL030W
YEL029C	990.92	927.165		YEL029C
YEL027W	4302.56	4586.05		YEL027W
YEL026W	7933.56	7591.93		YEL026W
YEL024W	3351.58	4372.34		YEL024W
YEL022W	939.885	927.102		YEL022W
YEL021W	1856.67	1810.47		YEL021W
YEL020W-A	4920.91	4924.15		YEL020W-A
YEL019C	664.287	621.178		YEL019C
YEL018W	2575.71	2148.84		YEL018W
YEL017C-A	7031.87	6211.75		YEL017C-A
YEL017W	1354.42	1640.02		YEL017W
YEL016C	1085.32	1296.56		YEL016C
YEL015W	1640.69	1.32554		YEL015W
YEL013W	1318.57	1454.26		YEL013W
YEL012W	698.45	788.418		YEL012W
YEL011W	1050.57	1502.07		YEL011W
YEL009C	14810.3	16072.5		YEL009C
YEL006W	1714.02	1539.69		YEL006W
YEL005C	806.913	804.246		YEL005C
YEL004W	926.146	877.448		YEL004W
YEL003W	1414.6	1380.72		YEL003W
YEL002C	1505.7	1561.54		YEL002C
YEL001C	1395.94	1536.51		YEL001C
YER001W	2025.26	2156.82		YER001W
YER002W	2412	2232.84		YER002W
YER003C	1329.25	1382.72		YER003C
YER004W	1950.7	1862.15		YER004W
YER005W	1567.31	1404.57		YER005W
YER006W	2456.63	2125.31		YER006W
YER007W	855.022	744.348		YER007W
YER007C-A	1716.61	1571.49		YER007C-A
YER008C	1053.55	1121.73		YER008C
YER009W	2642.39	2723.76		YER009W
YER010C	1246	1304.04		YER010C
YER011W	491.453	510.84		YER011W
YER012W	3724.34	3163.07		YER012W
YER013W	772.408	802.144		YER013W
YER014W	618.536	617.72		YER014W
YER014C-A	737.298	650.925		YER014C-A
YER015W	665.231	587.943		YER015W
YER016W	1261.47	1311.07		YER016W
YER017C	1331.38	1434.9		YER017C
YER018C	2015.43	1777.8		YER018C
YER019W	2469.99	2080.67		YER019W
YER019C-A	5039.03	4579.18		YER019C-A
YER020W	1220.68	1323.97		YER020W
YER021W	2152.41	2246.5		YER021W
YER022W	890.982	895.558		YER022W
YER023W	1756.45	1845.29		YER023W
YER024W	1219.39	996.923		YER024W
YER025W	3203.41	2970.58		YER025W
YER026C	1909.51	2328.84		YER026C
YER027C	1121.46	1156.05		YER027C
YER028C	1053.55	662.405		YER028C
YER029C	1370.56	1397.1		YER029C
YER030W	1468.18	1500.13		YER030W
YER031C	1682.82	1834.29		YER031C
YER032W	948.053	1146.92		YER032W
YER033C	594.913	743.428		YER033C
YER035W	3185.15	3209.82		YER035W
YER036C	3772.85	3172.2		YER036C
YER037W	1345.02	2006.13		YER037W
YER038C	736.31	802.817		YER038C
YER039C	1381.13	1241.69		YER039C
YER040W	1031.39	1073.56		YER040W
YER041W	725.987	693.335		YER041W
YER042W	1999.08	1643.84		YER042W
YER043C	6430.09	5920.86		YER043C
YER044C	2436.49	2445.12		YER044C
YER044C-A	792.064	780.85		YER044C-A
YER045C	695.857	1308.64		YER045C
YER046W	1183.62	1286.95		YER046W
YER047C	941.158	1057.16		YER047C
YER048C	1076.46	1082.53		YER048C
YER048W-A	1773.72	2094.01		YER048W-A
YER049W	1725.82	1382.67		YER049W
YER050C	1166.03	1387.46		YER050C
YER051W	778.063	807.261		YER051W
YER052C	2364.57	2131.25		YER052C
YER053C	1168.19	2535.87		YER053C
YER054C	913.739	1199.56		YER054C
YER055C	3069.43	3947.21		YER055C
YER056C	5731.69	5434.07		YER056C
YER056C-A	7504.32	7659.76		YER056C-A
YER057C	2279.18	2136.33		YER057C
YER058W	1130.98	1085.86		YER058W
YER059W	1225.23	1139.51		YER059W
YER060W	1521.07	1085.4		YER060W
YER060W-A	807.233	808.819		YER060W-A
YER061C	752.797	870.705		YER061C
YER062C	871.19	1680.18		YER062C
YER063W	3055.9	3299.56		YER063W
YER065C	2213.04	2183.36		YER065C
YER067W	910.914	3535.36		YER067W
YER068W	1747.94	1720.02		YER068W
YER069W	1072.29	1031.81		YER069W
YER070W	4862.33	4866.03		YER070W
YER072W	8329.85	10603.8		YER072W
YER073W	5943.84	4724.51		YER073W
YER074W	7850.85	8310.01		YER074W
YER074W-A	1269.49	1352.96		YER074W-A
YER075C	1192.76	1088.21		YER075C
YER078C	940.706	1018.57		YER078C
YER080W	901.975	956.604		YER080W
YER081W	4001.54	4018.44		YER081W
YER082C	1653.74	1541.38		YER082C
YER083C	1684.72	1649.17		YER083C
YER086W	1859.06	1674.52		YER086W
YER087W	868.627	794.339		YER087W
YER087C-B	2010.37	1999.61		YER087C-B
YER088C	2056.65	2343.34		YER088C
YER089C	2633.63	2634.13		YER089C
YER090W	1486.96	1456.39		YER090W
YER091C	4943.27	3708.33		YER091C
YER092W	2457.12	2465.24		YER092W
YER093C	858.556	862.745		YER093C
YER093C-A	1521.94	1357.18		YER093C-A
YER094C	2908.28	2901.2		YER094C
YER095W	1776.86	1829.94		YER095W
YER096W	410.663	432.891		YER096W
YER098W	646.537	754.563		YER098W
YER099C	1485.57	1524.08		YER099C
YER100W	1314.47	1351.06		YER100W
YER101C	757.936	758.583		YER101C
YER102W	9617.76	9815.92		YER102W
YER103W	807.577	860.151		YER103W
YER104W	1138.77	1018.15		YER104W
YER105C	1194.88	1124.75		YER105C
YER106W	340.905	313.69		YER106W
YER107C	1501.95	1389.98		YER107C
YER109C	949.735	941.288		YER109C
YER110C	1902.18	1647.74		YER110C
YER111C	794.786	882.241		YER111C
YER112W	1483.27	1463.28		YER112W
YER113C	1278.17	1110.13		YER113C
YER114C	1054.92	1073.13		YER114C
YER115C	1337.91	1050.44		YER115C
YER116C	1415.09	1253.53		YER116C
YER117W	9829.62	10251.7		YER117W
YER118C	1642.46	1719.43		YER118C
YER119C	1281.73	1441.18		YER119C
YER120W	2438.97	2573.11		YER120W
YER122C	2063.07	2191.13		YER122C
YER123W	1337.73	1359.82		YER123W
YER124C	3395.67	4713.6		YER124C
YER125W	1608.55	1721.03		YER125W
YER126C	3026.52	2619.9		YER126C
YER127W	2225.48	1673.79		YER127W
YER129W	1132.72	1125.94		YER129W
YER131W	8690.45	8637.93		YER131W
YER132C	1270.1	1166.18		YER132C
YER133W	2374.7	2687.88		YER133W
YER136W	1509.79	1626.67		YER136W
YER139C	901.64	981.629		YER139C
YER141W	1411.97	1717.74		YER141W
YER142C	649.704	659.891		YER142C
YER143W	1332.73	1315.68		YER143W
YER144C	1076.74	1417.29		YER144C
YER145C	3501.38	2964.89		YER145C
YER146W	2245.54	1960.56		YER146W
YER147C	1199.07	1116.25		YER147C
YER148W	2255.35	2348.16		YER148W
YER149C	1178.93	1055.31		YER149C
YER150W	840.35	1022.36		YER150W
YER151C	1288.86	1289.13		YER151C
YER152C	1363.06	1302.03		YER152C
YER153C	1238.76	980.039		YER153C
YER154W	2259.04	2089.5		YER154W
YER155C	1413.5	1510.75		YER155C
YER157W	947.807	910.514		YER157W
YER159C	2250.82	2889.32		YER159C
YER161C	1228.59	1305.2		YER161C
YER162C	717.89	752.035		YER162C
YER164W	970.177	905.413		YER164W
YER165W	3850.05	3751.97		YER165W
YER166W	1058.5	1107.93		YER166W
YER167W	1246.21	1403.95		YER167W
YER168C	1082.3	1023.02		YER168C
YER169W	941.206	903.333		YER169W
YER170W	1160.56	1100.94		YER170W
YER171W	1088.71	1077.2		YER171W
YER172C	942.495	953.732		YER172C
YER173W	1009.31	948.752		YER173W
YER174C	1282.68	1135.74		YER174C
YER175C	1006.01	933.273		YER175C
YER176W	1964.06	1789.88		YER176W
YER177W	5747.07	6614.13		YER177W
YER178W	2056.05	2225		YER178W
YER179W	509.619	641.563		YER179W
YER180C	1087.05	1056.24		YER180C
YER180C-A	1323.21	1282.43		YER180C-A
YER183C	1026.23	963.253		YER183C
YER185W	441.411	454.835		YER185W
YER190W	1401.95	1293.24		YER190W
YFL062W	400.131	595.398		YFL062W
YFL060C	623.381	606.527		YFL060C
YFL059W	604.936	584.47		YFL059W
YFL058W	445.904	460.331		YFL058W
YFL057C	1029.84	1097.62		YFL057C
YFL056C	1100.7	1167.63		YFL056C
YFL055W	551.319	575.031		YFL055W
YFL053W	520.647	540.999		YFL053W
YFL050C	743.855	878.777		YFL050C
YFL049W	847.325	1109.47		YFL049W
YFL048C	1098.43	1393.07		YFL048C
YFL047W	867.902	1010.03		YFL047W
YFL045C	4385.03	4208.78		YFL045C
YFL044C	2131.62	1787.46		YFL044C
YFL041W	942.114	817.912		YFL041W
YFL039C	5875.18	7053.83		YFL039C
YFL038C	3175.41	3498.05		YFL038C
YFL037W	2258.77	2130.93		YFL037W
YFL036W	1043.45	1122.44		YFL036W
YFL034C-B	1592.77	1497.15		YFL034C-B
YFL034C-A	10159.1	10672.6		YFL034C-A
YFL033C	852.705	830.759		YFL033C
YFL031W	6471.13	7619.22		YFL031W
YFL030W	740.427	734.832		YFL030W
YFL029C	742.774	705.503		YFL029C
YFL028C	958.216	903.668		YFL028C
YFL027C	1038.09	1057.27		YFL027C
YFL026W	6711.66	7235.43		YFL026W
YFL025C	1151.69	1197.93		YFL025C
YFL024C	1846	2006		YFL024C
YFL023W	1067.24	919.089		YFL023W
YFL022C	2554.2	2377.27		YFL022C
YFL021W	2824.8	3218.61		YFL021W
YFL020C	374.191	481.597		YFL020C
YFL018C	1570.83	1828.38		YFL018C
YFL017W-A	1945.03	1711.9		YFL017W-A
YFL017C	1616.41	1573.08		YFL017C
YFL016C	2228.63	2251.97		YFL016C
YFL014W	607.967	3372.11		YFL014W
YFL013C	1031.65	1211.27		YFL013C
YFL011W	339.867	339.685		YFL011W
YFL010W-A	1270.46	1394.61		YFL010W-A
YFL010C	1541.58	1580.03		YFL010C
YFL009W	979.126	934.325		YFL009W
YFL008W	953.497	954.39		YFL008W
YFL007W	1064.23	996.169		YFL007W
YFL005W	2418.29	2196.76		YFL005W
YFL004W	1705.56	1871.22		YFL004W
YFL003C	469.165	450.44		YFL003C
YFL002C	1242.26	1120.36		YFL002C
YFL001W	1236.11	1186.04		YFL001W
YFR001W	1732.34	1561.83		YFR001W
YFR002W	1500.09	1473.26		YFR002W
YFR003C	1400.62	1583.97		YFR003C
YFR004W	2461.71	2596.08		YFR004W
YFR005C	1470.16	1412.12		YFR005C
YFR007W	864.946	966.665		YFR007W
YFR008W	656.344	733.463		YFR008W
YFR009W	1626.97	1679.9		YFR009W
YFR010W	1458.48	1624.21		YFR010W
YFR011C	1282.11	1266.49		YFR011C
YFR013W	911.38	952.017		YFR013W
YFR014C	1156.25	1192.29		YFR014C
YFR015C	610.633	1375.22		YFR015C
YFR016C	717.747	785.546		YFR016C
YFR019W	755.647	847.232		YFR019W
YFR021W	1076.86	1070.68		YFR021W
YFR022W	715.087	748.476		YFR022W
YFR023W	311.624	282.161		YFR023W
YFR024C-A	1062.98	1007.5		YFR024C-A
YFR025C	1020.02	940.106		YFR025C
YFR026C	645.815	658.801		YFR026C
YFR027W	913.62	929.844		YFR027W
YFR028C	1445.59	1469.75		YFR028C
YFR029W	1027.02	917.776		YFR029W
YFR030W	1126.7	1043.38		YFR030W
YFR031C	914.068	975.077		YFR031C
YFR031C-A	8645.07	7983.95		YFR031C-A
YFR032C-A	12225	12522.3		YFR032C-A
YFR033C	5988.08	6075.9		YFR033C
YFR034C	3781.48	2889.67		YFR034C
YFR036W	1701.03	1330.63		YFR036W
YFR037C	1700.4	1651.25		YFR037C
YFR038W	792.591	714.331		YFR038W
YFR040W	1526.68	1558.67		YFR040W
YFR041C	1095.31	1220.24		YFR041C
YFR042W	949.242	1038.27		YFR042W
YFR043C	997.368	931.038		YFR043C
YFR044C	1506.15	1686.74		YFR044C
YFR046C	884.356	846.974		YFR046C
YFR047C	941.824	888.725		YFR047C
YFR048W	955.615	952.494		YFR048W
YFR049W	1424.14	1620.16		YFR049W
YFR050C	2219.67	2418.64		YFR050C
YFR051C	2048.84	1965.21		YFR051C
YFR052W	1963.83	2472.77		YFR052W
YFR053C	852.716	4118.58		YFR053C
YGL263W	0	0.253874		YGL263W
YGL258W	446.387	488.056		YGL258W
YGL257C	998.82	986.289		YGL257C
YGL256W	1739.69	1654.68		YGL256W
YGL255W	1406.52	1554.18		YGL255W
YGL254W	1401.51	1387.33		YGL254W
YGL253W	7095.06	4937.83		YGL253W
YGL252C	1265.06	1274.88		YGL252C
YGL251C	619.829	707.404		YGL251C
YGL250W	744.622	779.85		YGL250W
YGL249W	672.345	705.78		YGL249W
YGL248W	1108.42	1591.55		YGL248W
YGL247W	1743.45	1660.87		YGL247W
YGL246C	1234.32	1166.16		YGL246C
YGL245W	1922.99	1787.12		YGL245W
YGL244W	1096.64	1144.7		YGL244W
YGL243W	797.736	815.304		YGL243W
YGL241W	787.007	738.064		YGL241W
YGL240W	1169.42	1057.97		YGL240W
YGL238W	1548.78	1561.02		YGL238W
YGL237C	957.736	1007.85		YGL237C
YGL236C	1126.89	927.354		YGL236C
YGL234W	1701.66	1524.73		YGL234W
YGL233W	740.112	770.624		YGL233W
YGL232W	1183.31	1092.64		YGL232W
YGL231C	1492.08	1652.31		YGL231C
YGL229C	479.594	487.109		YGL229C
YGL228W	1259.74	1255.16		YGL228W
YGL227W	732.053	805.225		YGL227W
YGL226C-A	1472.08	1421.88		YGL226C-A
YGL226W	1589.52	1529.48		YGL226W
YGL225W	3322.1	3134.31		YGL225W
YGL224C	1918.13	1900.93		YGL224C
YGL223C	1114.52	1129.24		YGL223C
YGL222C	1740.92	2027.26		YGL222C
YGL221C	1734.22	1641.53		YGL221C
YGL220W	1468.08	1367.26		YGL220W
YGL219C	1301.05	1342.97		YGL219C
YGL216W	1114.8	1144.08		YGL216W
YGL215W	2335.6	2267.25		YGL215W
YGL213C	1069.92	1034.2		YGL213C
YGL212W	1002.75	1018.76		YGL212W
YGL211W	1870.65	1741.99		YGL211W
YGL210W	2821.88	2178.37		YGL210W
YGL209W	3354.99	2220.62		YGL209W
YGL208W	1062.11	914.49		YGL208W
YGL207W	1573.24	1616.72		YGL207W
YGL206C	1354.05	1546.41		YGL206C
YGL205W	591.27	539.383		YGL205W
YGL203C	1014.95	945.848		YGL203C
YGL202W	1870.46	1836.37		YGL202W
YGL201C	1026.1	1007.32		YGL201C
YGL200C	2425.56	2102.74		YGL200C
YGL198W	2296.84	2258.97		YGL198W
YGL197W	994.581	1150.31		YGL197W
YGL196W	1697.74	1600.43		YGL196W
YGL195W	1425.95	1436.1		YGL195W
YGL194C	1440.03	1414.84		YGL194C
YGL192W	1698.61	1806.59		YGL192W
YGL191W	2539.39	3102.49		YGL191W
YGL190C	1834.74	1742.95		YGL190C
YGL189C	10830.3	11153.2		YGL189C
YGL187C	2873.66	3003.46		YGL187C
YGL186C	1389.06	1319.98		YGL186C
YGL184C	518.389	603.378		YGL184C
YGL183C	315.777	327.271		YGL183C
YGL181W	1141.85	1261.32		YGL181W
YGL180W	597.56	583.764		YGL180W
YGL179C	702.073	763.708		YGL179C
YGL178W	1389.97	1425.17		YGL178W
YGL175C	960.633	893.339		YGL175C
YGL174W	1264.77	1107.8		YGL174W
YGL173C	1540.13	1602.89		YGL173C
YGL172W	1585.87	1401.59		YGL172W
YGL171W	1387.13	1085.09		YGL171W
YGL170C	497.181	384.809		YGL170C
YGL169W	1165.52	1025.57		YGL169W
YGL168W	2197.24	1944.95		YGL168W
YGL167C	1782.03	1861.66		YGL167C
YGL166W	1163.95	1047.51		YGL166W
YGL164C	1005.22	993.942		YGL164C
YGL163C	875.18	827.996		YGL163C
YGL162W	2103.23	2062.44		YGL162W
YGL161C	1448.31	1575.64		YGL161C
YGL160W	761.539	864.007		YGL160W
YGL158W	361.437	420.579		YGL158W
YGL157W	1007.04	1268.2		YGL157W
YGL156W	947.491	975.46		YGL156W
YGL155W	1083.95	1042.64		YGL155W
YGL154C	1226.87	1165.36		YGL154C
YGL153W	1014.38	916.944		YGL153W
YGL151W	947.869	1041.09		YGL151W
YGL150C	1124.12	1170.38		YGL150C
YGL148W	2670	2046.52		YGL148W
YGL147C	9863.36	9638.1		YGL147C
YGL145W	785.824	852.116		YGL145W
YGL144C	809.457	770.547		YGL144C
YGL143C	886.431	833.645		YGL143C
YGL142C	765.763	717.978		YGL142C
YGL141W	654.814	755.729		YGL141W
YGL139W	842.297	841.932		YGL139W
YGL137W	1800.35	1760.74		YGL137W
YGL136C	1494.82	1301.73		YGL136C
YGL135W	12745.6	12929.2		YGL135W
YGL134W	1542.29	1552.26		YGL134W
YGL133W	1196.08	1286.09		YGL133W
YGL131C	781.04	916.674		YGL131C
YGL130W	980.435	1041.97		YGL130W
YGL129C	1037.35	1039.65		YGL129C
YGL128C	1154.78	1010.67		YGL128C
YGL127C	1667.18	1620.21		YGL127C
YGL126W	1599.84	1555.39		YGL126W
YGL125W	1657.73	1579.3		YGL125W
YGL124C	803.68	803.34		YGL124C
YGL123W	13962.1	14142.1		YGL123W
YGL122C	3420.26	3627.11		YGL122C
YGL121C	1666.5	1904.29		YGL121C
YGL120C	1813.79	1505.5		YGL120C
YGL119W	717.895	660.499		YGL119W
YGL116W	1310.73	1475.3		YGL116W
YGL115W	1676.98	1818.41		YGL115W
YGL113W	796.702	742.002		YGL113W
YGL112C	1067.57	1062.84		YGL112C
YGL111W	1457.17	1267.42		YGL111W
YGL110C	1061.97	1045.88		YGL110C
YGL107C	1361.77	1286.49		YGL107C
YGL106W	2665.89	2236.53		YGL106W
YGL105W	2976.89	3056.92		YGL105W
YGL104C	758.385	753.058		YGL104C
YGL103W	21340.5	20835.3		YGL103W
YGL100W	1263.06	1221.35		YGL100W
YGL099W	1310.16	1079.71		YGL099W
YGL098W	1250.29	1243.37		YGL098W
YGL097W	1729.04	1604.19		YGL097W
YGL096W	567.393	695.524		YGL096W
YGL095C	761.768	892.539		YGL095C
YGL094C	964.431	982.267		YGL094C
YGL093W	829.62	896.337		YGL093W
YGL092W	1360.88	1331.34		YGL092W
YGL091C	1259.32	1302.48		YGL091C
YGL090W	786.661	820.606		YGL090W
YGL089C	802.127	728.977		YGL089C
YGL087C	5649.66	4944.46		YGL087C
YGL086W	892.874	947.581		YGL086W
YGL084C	865.379	900.845		YGL084C
YGL083W	1091.36	1147.11		YGL083W
YGL078C	2553.97	2133.23		YGL078C
YGL077C	3238.75	2428.64		YGL077C
YGL076C	8840.42	9047.37		YGL076C
YGL075C	912.746	813.527		YGL075C
YGL073W	1877.21	1676.38		YGL073W
YGL071W	2045.94	1682.13		YGL071W
YGL070C	2021.61	1989.81		YGL070C
YGL068W	2103.48	2089.2		YGL068W
YGL067W	1289.76	1152.86		YGL067W
YGL066W	1162.76	1174.95		YGL066W
YGL065C	1037.89	1060.58		YGL065C
YGL064C	888.491	911.111		YGL064C
YGL063W	1386.69	1159.32		YGL063W
YGL062W	1481.17	1506.14		YGL062W
YGL061C	937.653	951.488		YGL061C
YGL060W	779.013	801.262		YGL060W
YGL059W	841.537	899.019		YGL059W
YGL058W	1887.04	1873.64		YGL058W
YGL057C	1076.67	930.834		YGL057C
YGL056C	2441.41	2155.83		YGL056C
YGL055W	5675.53	5491.03		YGL055W
YGL054C	2534.66	2680.48		YGL054C
YGL053W	1129.35	1327.74		YGL053W
YGL051W	937.682	927.035		YGL051W
YGL050W	1332.79	1312.11		YGL050W
YGL049C	900.757	1129.67		YGL049C
YGL048C	1844.79	2042.41		YGL048C
YGL047W	1951.27	1693.79		YGL047W
YGL045W	751.495	929.267		YGL045W
YGL044C	1056.52	1172.6		YGL044C
YGL043W	1692.52	1630.57		YGL043W
YGL040C	2306.16	1895.1		YGL040C
YGL039W	1120.68	976.911		YGL039W
YGL038C	1683.33	1584.06		YGL038C
YGL037C	2205.3	3777.05		YGL037C
YGL035C	1724.77	1859.16		YGL035C
YGL033W	441.591	509.914		YGL033W
YGL032C	1327.89	1705.04		YGL032C
YGL031C	7258.14	7335.05		YGL031C
YGL030W	13306.9	13252.6		YGL030W
YGL029W	1977.62	1543.34		YGL029W
YGL028C	5386.49	7106.22		YGL028C
YGL027C	1035.42	1055.01		YGL027C
YGL026C	1745.09	1687.57		YGL026C
YGL025C	1397.61	1285.41		YGL025C
YGL023C	1162.68	1192.4		YGL023C
YGL022W	1920.74	1987.02		YGL022W
YGL021W	1236.78	1803.16		YGL021W
YGL020C	1367.73	1540.52		YGL020C
YGL019W	1765.38	1696.47		YGL019W
YGL018C	1099.81	1112.37		YGL018C
YGL017W	970.566	910.925		YGL017W
YGL016W	909.902	850.387		YGL016W
YGL014W	1563.18	1571.4		YGL014W
YGL013C	1053.03	1102.29		YGL013C
YGL012W	2062	1974.47		YGL012W
YGL011C	2553.28	2778.41		YGL011C
YGL009C	4022.71	3462.2		YGL009C
YGL008C	24766.7	24371.9		YGL008C
YGL006W	707.355	928.914		YGL006W
YGL005C	929.309	964.595		YGL005C
YGL004C	921.13	889.803		YGL004C
YGL003C	1384.25	1345.65		YGL003C
YGL002W	1102.3	1132.15		YGL002W
YGL001C	1374.45	1378.04		YGL001C
YGR002C	1044.38	1123.88		YGR002C
YGR003W	811.533	786.853		YGR003W
YGR004W	857.917	781.864		YGR004W
YGR005C	1075.66	1108.74		YGR005C
YGR006W	1502.26	1630.65		YGR006W
YGR007W	1795.98	2265.17		YGR007W
YGR008C	1932.71	3804.32		YGR008C
YGR009C	1092.42	1265.99		YGR009C
YGR010W	1327.32	1237.06		YGR010W
YGR012W	1234.47	1128.14		YGR012W
YGR013W	1282.38	1366.75		YGR013W
YGR014W	2624.97	3313.87		YGR014W
YGR019W	1089.99	1561.54		YGR019W
YGR020C	1986.96	2315.3		YGR020C
YGR023W	926.041	1228.62		YGR023W
YGR024C	1129.57	1182.09		YGR024C
YGR027C	9671.24	10364.1		YGR027C
YGR028W	855.18	1061.04		YGR028W
YGR029W	1170.15	1233.5		YGR029W
YGR030C	3289.52	2773.75		YGR030C
YGR031C-A	1807.81	1675.5		YGR031C-A
YGR032W	923.232	1711.64		YGR032W
YGR033C	1683.02	1692.95		YGR033C
YGR034W	6610.92	7041.55		YGR034W
YGR036C	1223.16	1189.92		YGR036C
YGR037C	3293.94	3010.7		YGR037C
YGR038W	1748.78	1716.45		YGR038W
YGR040W	2313.65	2428.57		YGR040W
YGR041W	1741.63	1722.02		YGR041W
YGR043C	484.647	531.828		YGR043C
YGR044C	964.416	1471.19		YGR044C
YGR046W	1019.1	1294.36		YGR046W
YGR047C	742.842	794.241		YGR047C
YGR048W	1254.15	1414.53		YGR048W
YGR049W	1806.65	1978.39		YGR049W
YGR054W	2549.32	2444.43		YGR054W
YGR055W	6831.11	6093		YGR055W
YGR056W	1244.55	1281.76		YGR056W
YGR057C	993.168	911.987		YGR057C
YGR058W	1047.9	976.86		YGR058W
YGR059W	555.09	523.53		YGR059W
YGR060W	6288.46	6361.49		YGR060W
YGR061C	1718.22	1669.15		YGR061C
YGR062C	2249.96	2399.74		YGR062C
YGR063C	2673.88	2714.97		YGR063C
YGR065C	1386.24	1303.35		YGR065C
YGR068C	959.631	1028.55		YGR068C
YGR070W	599.227	1059.99		YGR070W
YGR072W	945.869	1011.15		YGR072W
YGR074W	2346.08	2229.84		YGR074W
YGR075C	1536.06	1449.3		YGR075C
YGR076C	1297.77	1321.55		YGR076C
YGR077C	1306.75	1166.82		YGR077C
YGR078C	2473.45	2081.5		YGR078C
YGR080W	1639.59	1524.2		YGR080W
YGR081C	2217.88	2085.56		YGR081C
YGR082W	1967.29	1909.08		YGR082W
YGR083C	1645.6	1514.6		YGR083C
YGR084C	2107.01	1843.05		YGR084C
YGR085C	10656.4	10879.8		YGR085C
YGR086C	3963.18	5553.97		YGR086C
YGR087C	521.726	558.909		YGR087C
YGR088W	874.858	978.255		YGR088W
YGR089W	1092.45	1143.55		YGR089W
YGR090W	1646.57	1814.11		YGR090W
YGR091W	1299.8	1676.39		YGR091W
YGR092W	1279.11	1934.49		YGR092W
YGR094W	2545.6	2299.8		YGR094W
YGR095C	1558.76	1454.02		YGR095C
YGR096W	1032.92	1025.63		YGR096W
YGR097W	854.188	1559.23		YGR097W
YGR098C	648.831	709.49		YGR098C
YGR099W	884.167	926.646		YGR099W
YGR100W	752.944	835.021		YGR100W
YGR101W	1152.66	1137.96		YGR101W
YGR102C	1071.74	1341.38		YGR102C
YGR103W	2328.68	1890.95		YGR103W
YGR104C	1120.99	1123.87		YGR104C
YGR105W	1785.55	1572.86		YGR105W
YGR106C	1904.47	1907.78		YGR106C
YGR108W	1636.64	3681.6		YGR108W
YGR109C	1058.98	1305.69		YGR109C
YGR110W	532.908	624.154		YGR110W
YGR112W	847.562	816.822		YGR112W
YGR113W	1339.94	1377.95		YGR113W
YGR116W	1265.99	1305.67		YGR116W
YGR118W	9703.84	10287.3		YGR118W
YGR119C	2253.97	2175.72		YGR119C
YGR120C	1827.82	1733.5		YGR120C
YGR121C	1758.98	1659.87		YGR121C
YGR122W	884.3	838.441		YGR122W
YGR123C	1170.29	962.233		YGR123C
YGR124W	2489.76	2552.13		YGR124W
YGR128C	1583.34	1388.5		YGR128C
YGR129W	1026.21	976.728		YGR129W
YGR130C	1302.97	1528.66		YGR130C
YGR131W	901.977	876.544		YGR131W
YGR132C	1624.45	1712.73		YGR132C
YGR133W	1076.74	1054.93		YGR133W
YGR134W	937.375	904.9		YGR134W
YGR135W	2549.87	2712.08		YGR135W
YGR136W	2076.27	2551.65		YGR136W
YGR138C	1076.96	1637.75		YGR138C
YGR140W	862.954	851.222		YGR140W
YGR141W	1134.98	1085.29		YGR141W
YGR142W	1862.89	1681.43		YGR142W
YGR143W	1127.26	1675.28		YGR143W
YGR144W	589.586	473.395		YGR144W
YGR145W	1412.33	1175.94		YGR145W
YGR146C	2962.59	3433.48		YGR146C
YGR147C	1922.99	1804.07		YGR147C
YGR148C	7118	7167.62		YGR148C
YGR150C	834.828	865.211		YGR150C
YGR152C	1407.49	1220.53		YGR152C
YGR154C	1172.5	1275.23		YGR154C
YGR155W	6245.95	5855.81		YGR155W
YGR156W	3209.32	3119.32		YGR156W
YGR157W	2314.89	2914.89		YGR157W
YGR158C	2162.61	1938.5		YGR158C
YGR159C	7133.49	4305.88		YGR159C
YGR162W	2968.14	2730.34		YGR162W
YGR163W	1287.44	1210.13		YGR163W
YGR165W	1199.77	1283.77		YGR165W
YGR166W	942.442	1183		YGR166W
YGR167W	1757.93	1991.01		YGR167W
YGR169C	1230.01	1017.51		YGR169C
YGR170W	975.921	933.84		YGR170W
YGR171C	877.797	817.654		YGR171C
YGR172C	1329.14	1265.22		YGR172C
YGR173W	1744.98	1634.12		YGR173W
YGR174C	1126.12	1510.6		YGR174C
YGR175C	3703.48	3977.29		YGR175C
YGR177C	2282.37	1931.92		YGR177C
YGR178C	2252.31	1969.8		YGR178C
YGR179C	932.089	1013.66		YGR179C
YGR180C	1691.12	1575.88		YGR180C
YGR181W	2677.18	2501.11		YGR181W
YGR183C	4331.86	4861.6		YGR183C
YGR184C	967.534	991.351		YGR184C
YGR185C	2740.81	2718.81		YGR185C
YGR186W	1266.45	1322.1		YGR186W
YGR187C	1640.94	1218.33		YGR187C
YGR188C	624.358	619.328		YGR188C
YGR189C	4351.31	7700.79		YGR189C
YGR191W	1905.77	1975.18		YGR191W
YGR192C	34653.6	31413.3		YGR192C
YGR193C	1575.28	1436.61		YGR193C
YGR194C	721.218	827.126		YGR194C
YGR195W	2391.5	2284.19		YGR195W
YGR196C	973.431	953.927		YGR196C
YGR197C	1362.65	1246.66		YGR197C
YGR198W	1524.71	1489.92		YGR198W
YGR199W	1193.2	1097.07		YGR199W
YGR200C	1739.64	1558.68		YGR200C
YGR202C	1436.69	1269.45		YGR202C
YGR203W	1424.36	1226.93		YGR203W
YGR204W	2400.86	2396.01		YGR204W
YGR205W	884.822	951.975		YGR205W
YGR206W	1462.53	1536.83		YGR206W
YGR207C	1145.84	1312.17		YGR207C
YGR208W	1792.17	1865.88		YGR208W
YGR209C	2535.35	2485.23		YGR209C
YGR211W	3163.81	2652.24		YGR211W
YGR212W	739.697	760.752		YGR212W
YGR213C	788.608	882.855		YGR213C
YGR214W	5890.16	5663.07		YGR214W
YGR215W	1665.42	1547.6		YGR215W
YGR216C	1006.74	1006.29		YGR216C
YGR217W	657.658	725.173		YGR217W
YGR218W	1285.1	1356.5		YGR218W
YGR220C	1697.14	1746.54		YGR220C
YGR221C	972.332	1016.66		YGR221C
YGR222W	1072.46	1263.63		YGR222W
YGR223C	959.363	1172.21		YGR223C
YGR224W	640.987	712.969		YGR224W
YGR225W	261.059	306.052		YGR225W
YGR227W	880.782	941.372		YGR227W
YGR229C	1949.65	1987.03		YGR229C
YGR230W	932.569	1227.11		YGR230W
YGR231C	1516.88	1657.32		YGR231C
YGR232W	1491.34	1478.22		YGR232W
YGR233C	1450.58	1718.14		YGR233C
YGR234W	10523.4	11113.8		YGR234W
YGR236C	996.868	1064.25		YGR236C
YGR238C	621.52	577.668		YGR238C
YGR239C	1612.33	1536.78		YGR239C
YGR240C	4025.82	4004.93		YGR240C
YGR241C	1723.27	1775.66		YGR241C
YGR244C	1292.36	1722.85		YGR244C
YGR245C	1638.17	1356.92		YGR245C
YGR246C	826.676	813.283		YGR246C
YGR247W	720.478	771.351		YGR247W
YGR248W	442.375	657.467		YGR248W
YGR249W	440.223	446.255		YGR249W
YGR250C	831.141	1113.62		YGR250C
YGR251W	1552.67	1203.72		YGR251W
YGR252W	1463.74	1514.88		YGR252W
YGR253C	2800.53	3001.9		YGR253C
YGR254W	3783.67	6262.7		YGR254W
YGR255C	744.056	938.202		YGR255C
YGR256W	541.436	575.351		YGR256W
YGR257C	1489.98	1487.57		YGR257C
YGR258C	632.612	665.784		YGR258C
YGR260W	1435.09	1176.83		YGR260W
YGR261C	858.108	920.732		YGR261C
YGR262C	1143.49	1108.41		YGR262C
YGR263C	742.887	726.237		YGR263C
YGR264C	2789.69	2693.48		YGR264C
YGR266W	1111.03	1121.39		YGR266W
YGR267C	1950.49	1923.19		YGR267C
YGR268C	2201.51	2232.22		YGR268C
YGR270W	1178.28	1245.04		YGR270W
YGR271W	737.479	779.426		YGR271W
YGR271C-A	1100.27	968.497		YGR271C-A
YGR274C	823.747	867.757		YGR274C
YGR275W	954.529	1029.68		YGR275W
YGR276C	816.932	767.723		YGR276C
YGR277C	974.92	1022.33		YGR277C
YGR278W	1146.3	1100.05		YGR278W
YGR279C	5130.65	5175.98		YGR279C
YGR280C	1729.54	1402.02		YGR280C
YGR281W	973.402	1056.02		YGR281W
YGR282C	4772.31	7451.64		YGR282C
YGR283C	2122.88	3294.8		YGR283C
YGR284C	1536.99	1513.77		YGR284C
YGR285C	3339.87	2948.95		YGR285C
YGR286C	1115.45	756.213		YGR286C
YGR287C	572.924	504.241		YGR287C
YGR288W	660.753	754.336		YGR288W
YGR289C	584.182	737.656		YGR289C
YGR292W	902.893	872.888		YGR292W
YGR294W	696.769	532.001		YGR294W
YGR295C	1892.03	2182.39		YGR295C
YGR296W	1350.45	1272.59		YGR296W
YHL048W	747.251	883.281		YHL048W
YHL047C	784.807	800.485		YHL047C
YHL046C	389.239	353.292		YHL046C
YHL043W	893.5	1024.65		YHL043W
YHL040C	1196.69	942.664		YHL040C
YHL039W	1181.2	1041.62		YHL039W
YHL038C	891.707	820.519		YHL038C
YHL036W	1009.81	1200.83		YHL036W
YHL035C	763.534	971.087		YHL035C
YHL034C	1729.28	2193.04		YHL034C
YHL033C	19381.9	19691		YHL033C
YHL032C	1038.99	975.378		YHL032C
YHL031C	1495.95	1557.81		YHL031C
YHL030W	770.878	765.964		YHL030W
YHL028W	1131.12	1103.5		YHL028W
YHL027W	1514.77	1713.17		YHL027W
YHL025W	2585.98	2564.33		YHL025W
YHL024W	759.927	1197.6		YHL024W
YHL023C	792.255	798.733		YHL023C
YHL022C	534.674	445.547		YHL022C
YHL021C	946.173	1870.43		YHL021C
YHL020C	2054.13	2586.45		YHL020C
YHL019C	827.299	928.712		YHL019C
YHL016C	777.013	885.562		YHL016C
YHL015W	13170.1	13932.6		YHL015W
YHL014C	1849.55	1587.19		YHL014C
YHL013C	1099.24	1008.44		YHL013C
YHL011C	2957.92	2850.96		YHL011C
YHL010C	732.652	817.965		YHL010C
YHL009C	763.312	883.025		YHL009C
YHL007C	1929.3	1729.49		YHL007C
YHL006C	2100.28	1907.43		YHL006C
YHL004W	1567.74	1458.16		YHL004W
YHL003C	1468.99	1426.21		YHL003C
YHL002W	1757.4	1871.74		YHL002W
YHL001W	7298.66	7753.97		YHL001W
YHR001W	1144.99	1269.95		YHR001W
YHR001W-A	1953.22	2392.66		YHR001W-A
YHR002W	1099.9	1148.43		YHR002W
YHR003C	1582.42	1397.21		YHR003C
YHR004C	938.759	888.643		YHR004C
YHR005C	2222.46	2449.7		YHR005C
YHR005C-A	5707.6	5643.68		YHR005C-A
YHR006W	1685.16	2501.95		YHR006W
[truncated: 3,772 more rows]
