# Supplementary material for: Decapping activators Edc3 and Scd6 act redundantly with Dhh1 in post-transcriptional repression of starvation-induced pathways
Source: eLife. 2025 Nov 25;13:RP102287. doi: 10.7554/eLife.102287 (PMC12646578; doi:10.7554/eLife.102287)
Supplement: Figure 3—source data 2. — Sheet 1 lists the numbers of reads for each ERCC molecule identified in each RNA sample and calculations of the normalization factors for each sample. Sheet 2 lists the un-normalized reads for each yeast gene in each RNA sample, the ERCC-normalized reads for each sample, and the density of normalized reads for each gene calculated by normalizing for coding sequences (CDS) lengths. Sheets 2–4 list processed data from DESeq2, including log2Δ mRNA, p-value, and adj. p-value determined for each gene in the indicated mutant vs. wild-type (WT) strain, obtained by setting the size factor to unity. [file elife-102287-fig3-data2.xlsx]

## Sheet: Notes
Sheet 1 lists the numbers of reads for each ERCC molecule identified in each RNA sample and calculations of the size factors for each sample. Sheet 2 lists the un-normalized reads for each yeast gene in each RNA sample, the ERCC-normalized reads for each sample, and the density of normalized reads for each gene calculated by normalizing for CDS lengths. Sheets 2-4 lists processed data from DESeq2…

## Sheet: ERCC_Corr_FA
# Program:featureCounts v2.0.3; Command:"featureCounts" "-g" "gene_id" "-M" "--primary" "--ignoreDup" "-s" "2" "-T" "16" "-a" "../SacCer_Genome/sacCer3_plus_ERCC.gtf" "-o" "FZ5888ERCC_05_Reads_Counts/FZ5888ERCC.reads_counts.txt" "FZ5888ERCC_04_Bam_Files/FZ5888-1.bam" "FZ5888ERCC_04_Bam_Files/FZ5888-2.bam" "FZ5888ERCC_04_Bam_Files/FZ5888-3.bam" "FZ5888ERCC_04_Bam_Files/FZ5888-4.bam" "FZ5888ERCC_04…
Geneid	Chr	Start	End	Strand	Length	edc3_d-1	edc3_d-2	scd6edc3_dd-1	scd6edc3_dd-2	WT-1	WT-2	scd6_d-1	scd6_d-2
ERCC-00002	ERCC-00002	1	1061	+	1061	128655	226056	111555	118350	145989	97551	122753	134274
ERCC-00003	ERCC-00003	1	1023	+	1023	33237	64024	29664	34101	38988	25311	35214	36644
ERCC-00004	ERCC-00004	1	523	+	523	50346	91030	40606	52702	57662	34537	45052	53203
ERCC-00009	ERCC-00009	1	984	+	984	5539	10015	4802	5351	6338	4201	5652	6140
ERCC-00012	ERCC-00012	1	994	+	994	4	2	1	1	4	2	5	1
ERCC-00013	ERCC-00013	1	808	+	808	8	8	7	7	205	380	155	6
ERCC-00014	ERCC-00014	1	1957	+	1957	79	129	76	89	131	152	82	51
ERCC-00016	ERCC-00016	1	844	+	844	1	5	0	0	2	4	0	8
ERCC-00017	ERCC-00017	1	1136	+	1136	1	1	0	1	0	0	0	3
ERCC-00019	ERCC-00019	1	644	+	644	224	331	206	239	286	166	208	218
ERCC-00022	ERCC-00022	1	751	+	751	3128	5933	2731	2975	3463	2296	3134	3386
ERCC-00024	ERCC-00024	1	536	+	536	0	2	1	0	3	0	1	4
ERCC-00025	ERCC-00025	1	1994	+	1994	2011	3668	1842	1938	2232	1600	1942	2250
ERCC-00028	ERCC-00028	1	1130	+	1130	38	88	36	46	46	28	34	57
ERCC-00031	ERCC-00031	1	1138	+	1138	34	63	24	25	40	18	31	34
ERCC-00033	ERCC-00033	1	2022	+	2022	17	45	16	17	18	19	17	21
ERCC-00034	ERCC-00034	1	1019	+	1019	245	449	196	236	275	193	226	259
ERCC-00035	ERCC-00035	1	1130	+	1130	1902	3351	1692	1887	2122	1400	1909	2067
ERCC-00039	ERCC-00039	1	740	+	740	21	29	21	15	20	20	16	22
ERCC-00040	ERCC-00040	1	744	+	744	4	11	7	13	10	6	14	7
ERCC-00041	ERCC-00041	1	1122	+	1122	3	4	4	4	4	12	3	2
ERCC-00042	ERCC-00042	1	1023	+	1023	17773	32204	15654	17032	20420	13396	18142	19427
ERCC-00043	ERCC-00043	1	1023	+	1023	5156	9750	4428	5038	5846	3987	5185	5672
ERCC-00044	ERCC-00044	1	1156	+	1156	2643	4992	2289	2622	3162	1923	2700	2932
ERCC-00046	ERCC-00046	1	522	+	522	20347	35516	17141	18857	22164	15464	19240	20779
ERCC-00048	ERCC-00048	1	992	+	992	0	3	3	1	0	1	0	0
ERCC-00051	ERCC-00051	1	274	+	274	173	274	143	149	154	151	155	140
ERCC-00053	ERCC-00053	1	1023	+	1023	520	965	435	531	573	433	575	621
ERCC-00054	ERCC-00054	1	274	+	274	5	9	4	6	7	6	2	8
ERCC-00057	ERCC-00057	1	1021	+	1021	1	0	0	1	0	0	0	0
ERCC-00058	ERCC-00058	1	1136	+	1136	23	33	22	21	19	20	23	31
ERCC-00059	ERCC-00059	1	525	+	525	141	268	163	140	201	98	138	148
ERCC-00060	ERCC-00060	1	523	+	523	1438	2570	1243	1322	1658	1113	1406	1449
ERCC-00061	ERCC-00061	1	1136	+	1136	1	0	1	2	0	3	1	0
ERCC-00062	ERCC-00062	1	1023	+	1023	466	981	409	457	576	343	535	647
ERCC-00067	ERCC-00067	1	644	+	644	13	21	9	15	13	6	23	12
ERCC-00069	ERCC-00069	1	1137	+	1137	42	50	31	42	35	31	33	31
ERCC-00071	ERCC-00071	1	642	+	642	569	1022	532	583	681	417	531	652
ERCC-00073	ERCC-00073	1	603	+	603	6	12	5	8	9	3	5	12
ERCC-00074	ERCC-00074	1	522	+	522	227320	436305	201733	238101	271987	172403	234076	242768
ERCC-00075	ERCC-00075	1	1023	+	1023	4	0	0	1	3	1	1	2
ERCC-00076	ERCC-00076	1	642	+	642	1124	1924	958	1062	1086	863	1014	1112
ERCC-00077	ERCC-00077	1	273	+	273	7	17	11	12	6	6	4	8
ERCC-00078	ERCC-00078	1	993	+	993	338	579	292	361	366	229	313	357
ERCC-00079	ERCC-00079	1	644	+	644	614	1123	561	652	713	457	602	713
ERCC-00081	ERCC-00081	1	534	+	534	0	7	1	0	7	1	2	2
ERCC-00083	ERCC-00083	1	1022	+	1022	1	3	0	1	1	0	1	0
ERCC-00084	ERCC-00084	1	994	+	994	448	778	380	474	518	361	472	462
ERCC-00085	ERCC-00085	1	844	+	844	35	46	15	18	27	15	15	15
ERCC-00086	ERCC-00086	1	1020	+	1020	2	10	2	1	2	6	4	3
ERCC-00092	ERCC-00092	1	1124	+	1124	2059	3827	1799	1945	2452	1563	2133	2266
ERCC-00095	ERCC-00095	1	521	+	521	1224	2169	1132	1314	1481	956	1259	1250
ERCC-00096	ERCC-00096	1	1107	+	1107	256093	511556	240724	266040	308406	208351	268979	278714
ERCC-00097	ERCC-00097	1	523	+	523	4	0	6	5	8	3	6	4
ERCC-00098	ERCC-00098	1	1143	+	1143	0	0	3	1	0	2	0	0
ERCC-00099	ERCC-00099	1	1350	+	1350	209	367	188	203	254	220	239	258
ERCC-00104	ERCC-00104	1	2022	+	2022	21	36	11	20	24	10	16	17
ERCC-00108	ERCC-00108	1	1022	+	1022	8070	15339	7397	8133	9691	6199	8254	9051
ERCC-00109	ERCC-00109	1	536	+	536	4	11	6	6	5	4	3	5
ERCC-00111	ERCC-00111	1	994	+	994	10282	18723	9022	9722	11657	7731	9998	10841
ERCC-00112	ERCC-00112	1	1136	+	1136	1519	2604	1338	1441	1688	1113	1430	1518
ERCC-00113	ERCC-00113	1	840	+	840	38488	74138	35717	39296	45573	30695	39108	40755
ERCC-00116	ERCC-00116	1	1991	+	1991	7505	12661	6673	7499	8872	5478	7314	7464
ERCC-00117	ERCC-00117	1	1136	+	1136	2	3	0	3	0	2	0	1
ERCC-00120	ERCC-00120	1	536	+	536	7	5	2	5	4	8	6	5
ERCC-00123	ERCC-00123	1	1022	+	1022	14	13	11	11	12	7	13	19
ERCC-00126	ERCC-00126	1	1118	+	1118	73	169	77	87	119	59	67	113
ERCC-00130	ERCC-00130	1	1059	+	1059	207349	355727	179257	204881	232420	156627	199465	213236
ERCC-00131	ERCC-00131	1	771	+	771	1437	2958	1313	1520	1669	1105	1549	1643
ERCC-00134	ERCC-00134	1	274	+	274	1	2	1	2	1	2	1	2
ERCC-00136	ERCC-00136	1	1033	+	1033	11462	20565	9971	10581	14358	10029	11614	12214
ERCC-00137	ERCC-00137	1	537	+	537	1	2	0	0	1	2	1	0
ERCC-00138	ERCC-00138	1	1024	+	1024	5	2	6	1	2	1	2	4
ERCC-00142	ERCC-00142	1	493	+	493	1	0	1	2	1	0	0	0
ERCC-00143	ERCC-00143	1	784	+	784	57	96	52	46	36	21	41	49
ERCC-00144	ERCC-00144	1	538	+	538	77	142	65	75	68	62	83	82
ERCC-00145	ERCC-00145	1	1042	+	1042	6276	10507	5556	6167	7146	4801	6054	6411
ERCC-00147	ERCC-00147	1	1023	+	1023	0	10	4	6	8	5	8	6
ERCC-00148	ERCC-00148	1	494	+	494	18	21	17	23	31	18	10	18
ERCC-00150	ERCC-00150	1	743	+	743	47	83	29	46	51	34	23	30
ERCC-00154	ERCC-00154	1	537	+	537	23	90	27	26	33	19	25	25
ERCC-00156	ERCC-00156	1	494	+	494	0	0	0	1	1	2	2	0
ERCC-00157	ERCC-00157	1	1019	+	1019	67	91	76	75	87	55	64	61
ERCC-00158	ERCC-00158	1	1027	+	1027	2	13	9	5	5	2	11	4
ERCC-00160	ERCC-00160	1	743	+	743	101	173	92	104	139	68	106	98
ERCC-00162	ERCC-00162	1	523	+	523	1049	1941	863	1034	1214	729	1049	1116
ERCC-00163	ERCC-00163	1	543	+	543	74	124	66	88	91	61	71	65
ERCC-00164	ERCC-00164	1	1022	+	1022	18	27	24	15	16	9	18	21
ERCC-00165	ERCC-00165	1	872	+	872	734	1366	617	660	813	571	734	734
ERCC-00168	ERCC-00168	1	1024	+	1024	16	33	25	31	28	21	23	19
ERCC-00170	ERCC-00170	1	1023	+	1023	122	187	97	116	120	83	93	129
ERCC-00171	ERCC-00171	1	505	+	505	10736	17154	9655	11358	13313	8047	10075	10606
ERCC sum						1069954	1987641	951881	1078101	1249970	824408	1071593	1135514	1.17113e+06
Correction FA						0.913606	1.69719	0.812786	0.920562	1.06732	0.703941	0.915005	0.969586	1

## Sheet: RNASeq_wERCC_Normalization
	Un-normalized Counts																Normalized Counts																		Normalized Counts per kb
																CorrectionFA	0.913606	1.69719	0.812786	0.920562	1.06732	0.703941	0.915005	0.969586
Geneid	edc3_d-1	edc3_d-2	scd6edc3_dd-1	scd6edc3_dd-2	WT-1	WT-2	scd6_d-1	scd6_d-2								Geneid	edc3_d-1	edc3_d-2	scd6edc3_dd-1	scd6edc3_dd-2	WT-1	WT-2	scd6_d-1	scd6_d-2								Geneid	Length	length kb	edc3_d-1	edc3_d-2	scd6edc3_dd-1	scd6edc3_dd-2	WT-1	WT-2	scd6_d-1	scd6_d-2
YAL012W	53487	73447	52529	55294	54319	50686	65905	62206								YAL012W	58545.3	43275.4	64627.2	60063	50893.8	72007.4	72027.3	64156.4								YAL012W	1185	1.185	49405.3	36519.3	54537.7	50686.1	42948.4	60765.7	60782.6	54140.4
YAL069W	5	0	7	7	1	3	7	7								YAL069W	5.47285	0	8.6122	7.60374	0.936944	4.26197	7.65027	7.21947								YAL069W	315	0.315	17.3741	0	27.3403	24.1388	2.97442	13.5301	24.2866	22.919
YAL068W-A	0	0	0	0	0	0	0	0								YAL068W-A	0	0	0	0	0	0	0	0								YAL068W-A	255	0.255	0	0	0	0	0	0	0	0
YAL068C	44	43	39	47	55	51	61	68								YAL068C	48.1611	25.3358	47.9823	51.0537	51.5319	72.4535	66.6667	70.132								YAL068C	363	0.363	132.675	69.7957	132.183	140.644	141.961	199.596	183.655	193.201
YAL067W-A	0	0	0	0	0	0	0	0								YAL067W-A	0	0	0	0	0	0	0	0								YAL067W-A	228	0.228	0	0	0	0	0	0	0	0
YAL067C	100	118	268	218	265	221	295	257								YAL067C	109.457	69.5263	329.724	236.802	248.29	313.965	322.404	265.058								YAL067C	1782	1.782	61.4237	39.0159	185.031	132.886	139.332	176.187	180.923	148.742
YAL066W	5	6	6	3	4	1	7	3								YAL066W	5.47285	3.53523	7.38189	3.25874	3.74777	1.42066	7.65027	3.09406								YAL066W	309	0.309	17.7115	11.4409	23.8896	10.5461	12.1287	4.59759	24.7582	10.0131
YAL065C	45	82	74	96	53	39	60	49								YAL065C	49.2557	48.3149	91.0433	104.28	49.658	55.4056	65.5738	50.5363								YAL065C	387	0.387	127.276	124.845	235.254	269.457	128.315	143.167	169.441	130.585
YAL064W-B	60	49	86	106	72	60	91	89								YAL064W-B	65.6743	28.8711	105.807	115.142	67.4599	85.2394	99.4536	91.7904								YAL064W-B	381	0.381	172.373	75.7771	277.709	302.211	177.06	223.725	261.033	240.92
YAL064C-A	9	3	29	46	24	21	26	23								YAL064C-A	9.85114	1.76762	35.6791	49.9674	22.4866	29.8338	28.4153	23.7211								YAL064C-A	381	0.381	25.856	4.63942	93.646	131.148	59.0201	78.3039	74.5808	62.2602
YAL064W	6	6	5	12	9	4	6	7								YAL064W	6.56743	3.53523	6.15157	13.035	8.43249	5.68263	6.55738	7.21947								YAL064W	285	0.285	23.0436	12.4043	21.5845	45.7368	29.5877	19.939	23.0083	25.3315
YAL063C-A	39	35	25	28	42	37	41	43								YAL063C-A	42.6883	20.6222	30.7579	30.4149	39.3516	52.5643	44.8087	44.3482								YAL063C-A	291	0.291	146.695	70.8667	105.697	104.519	135.229	180.633	153.982	152.399
YAL063C	217	255	438	466	227	247	327	294								YAL063C	237.522	150.247	538.878	506.192	212.686	350.902	357.377	303.218								YAL063C	3969	3.969	59.8443	37.8552	135.772	127.536	53.5869	88.4107	90.0421	76.3965
YAL062W	117	248	316	328	105	123	155	130								YAL062W	128.065	146.123	388.78	356.289	98.3791	174.741	169.399	134.076								YAL062W	1374	1.374	93.2058	106.349	282.955	259.308	71.6005	127.177	123.289	97.5807
YAL061W	158	129	1359	1337	105	86	205	137								YAL061W	172.942	76.0075	1672	1452.31	98.3791	122.176	224.044	141.295								YAL061W	1254	1.254	137.912	60.6121	1333.33	1158.14	78.4522	97.4294	178.663	112.676
YAL060W	4000	5018	11065	11271	4299	3870	6031	5217								YAL060W	4378.28	2956.63	13613.4	12243.1	4027.92	5497.94	6591.26	5380.57								YAL060W	1149	1.149	3810.52	2573.22	11848.1	10655.4	3505.59	4784.98	5736.52	4682.83
YAL059C-A	2	5	6	11	7	5	6	7								YAL059C-A	2.18914	2.94603	7.38189	11.9487	6.55861	7.10328	6.55738	7.21947								YAL059C-A	423	0.423	5.17528	6.96461	17.4513	28.2476	15.505	16.7926	15.5021	17.0673
YAL059W	1048	1993	1288	1391	1258	1227	1410	1225								YAL059W	1147.11	1174.29	1584.65	1510.97	1178.68	1743.15	1540.98	1263.41								YAL059W	639	0.639	1795.16	1837.69	2479.88	2364.59	1844.56	2727.93	2411.55	1977.16
YAL058W	2098	2370	2060	2142	2273	2035	2590	2482								YAL058W	2296.41	1396.42	2534.45	2326.74	2129.67	2891.04	2830.6	2559.82								YAL058W	1509	1.509	1521.81	925.393	1679.56	1541.91	1411.31	1915.86	1875.81	1696.37
YAL056C-A	2	8	4	5	5	1	1	3								YAL056C-A	2.18914	4.71365	4.92126	5.43124	4.68472	1.42066	1.0929	3.09406								YAL056C-A	351	0.351	6.23687	13.4292	14.0207	15.4736	13.3468	4.04745	3.11366	8.81498
YAL056W	1767	1501	2996	3025	1792	1782	2487	2402								YAL056W	1934.11	884.398	3686.02	3285.9	1679	2531.61	2718.03	2477.31								YAL056W	2643	2.643	731.785	334.619	1394.64	1243.25	635.264	957.855	1028.39	937.31
YAL055W	82	78	124	126	67	70	95	97								YAL055W	89.7548	45.958	152.559	136.867	62.7752	99.4459	103.825	100.041								YAL055W	543	0.543	165.294	84.6373	280.956	252.058	115.608	183.142	191.207	184.238
YAL054C	604	1232	1523	1585	553	537	753	680								YAL054C	661.121	725.901	1873.77	1721.7	518.13	762.892	822.951	701.32								YAL054C	2142	2.142	308.647	338.89	874.776	803.783	241.891	356.159	384.197	327.414
YAL053W	7864	9611	20987	21658	8834	8506	12252	10859								YAL053W	8607.71	5662.86	25820.6	23526	8276.96	12084.1	13390.2	11199.5								YAL053W	2352	2.352	3659.74	2407.68	10978.2	10002.5	3519.12	5137.8	5693.1	4761.68
YAL051W	2715	1961	3901	4159	2873	2502	4071	3613								YAL051W	2971.76	1155.43	4799.46	4517.71	2691.84	3554.48	4449.18	3726.28								YAL051W	3144	3.144	945.216	367.504	1526.55	1436.93	856.183	1130.56	1415.13	1185.2
YAL049C	3449	3239	4949	4874	3220	2901	4251	3617								YAL049C	3775.18	1908.44	6088.83	5294.37	3016.96	4121.32	4645.9	3730.4								YAL049C	741	0.741	5094.7	2575.49	8217.04	7144.9	4071.47	5561.84	6269.77	5034.28
YAL048C	1108	642	1393	1473	1116	1086	1480	1352								YAL048C	1212.78	378.27	1713.83	1600.04	1045.63	1542.83	1617.49	1394.39								YAL048C	1989	1.989	609.746	190.181	861.653	804.446	525.706	775.683	813.216	701.05
YAL047W-A	8	5	0	2	4	0	1	2								YAL047W-A	8.75657	2.94603	0	2.1725	3.74777	0	1.0929	2.06271								YAL047W-A	330	0.33	26.5351	8.92736	0	6.58332	11.3569	0	3.31181	6.25063
YAL047C	679	759	1296	1480	769	779	1148	1000								YAL047C	743.214	447.207	1594.49	1607.65	720.51	1106.69	1254.64	1031.35								YAL047C	1869	1.869	397.653	239.276	853.124	860.164	385.505	592.13	671.292	551.821
YAL046C	665	851	868	852	633	621	722	694								YAL046C	727.89	501.414	1067.91	925.483	593.085	882.228	789.071	715.759								YAL046C	357	0.357	2038.91	1404.52	2991.35	2592.39	1661.3	2471.23	2210.28	2004.93
YAL045C	3	0	2	3	2	2	1	2								YAL045C	3.28371	0	2.46063	3.25874	1.87389	2.84131	1.0929	2.06271								YAL045C	309	0.309	10.6269	0	7.9632	10.5461	6.06436	9.19519	3.53688	6.67542
YAL044W-A	1663	3030	2117	2010	1552	1518	1936	1766								YAL044W-A	1820.27	1785.29	2604.58	2183.36	1454.14	2156.56	2115.85	1821.37								YAL044W-A	333	0.333	5466.28	5361.24	7821.55	6556.63	4366.78	6476.15	6353.89	5469.58
YAL044C	2488	3595	5183	4961	2662	2313	3451	3198								YAL044C	2723.29	2118.19	6376.72	5388.88	2494.14	3285.98	3771.58	3298.27								YAL044C	513	0.513	5308.56	4129.03	12430.3	10504.6	4861.88	6405.42	7352.02	6429.37
YAL043C	6631	6256	9593	10108	5618	6012	8571	7854								YAL043C	7258.1	3686.07	11802.4	10979.8	5263.75	8540.99	9367.21	8100.25								YAL043C	2358	2.358	3078.07	1563.22	5005.26	4656.4	2232.29	3622.13	3972.52	3435.22
YAL042C-A	3	7	7	5	2	6	6	1								YAL042C-A	3.28371	4.12444	8.6122	5.43124	1.87389	8.52394	6.55738	1.03135								YAL042C-A	378	0.378	8.68707	10.9112	22.7836	14.3684	4.95737	22.5501	17.3476	2.72845
YAL042W	9105	12555	8650	8819	9138	8954	10980	9996								YAL042W	9966.07	7397.48	10642.2	9579.62	8561.79	12720.6	12000	10309.4								YAL042W	1248	1.248	7985.63	5927.47	8527.42	7675.98	6860.41	10192.8	9615.38	8260.74
YAL041W	3024	2212	5296	5824	3482	3225	4939	4245								YAL041W	3309.98	1303.32	6515.75	6326.31	3262.44	4581.62	5397.81	4378.09								YAL041W	2565	2.565	1290.44	508.118	2540.25	2466.4	1271.91	1786.21	2104.41	1706.86
YAL040C	9011	6287	16802	18739	9814	10903	14774	13024								YAL040C	9863.18	3704.34	20671.8	20355.2	9195.17	15489.4	16146.4	13432.3								YAL040C	1743	1.743	5658.74	2125.26	11859.9	11678.3	5275.48	8886.64	9263.6	7706.45
YAL039C	1764	1856	3068	3107	1563	1532	1829	1645								YAL039C	1930.82	1093.57	3774.61	3374.97	1464.44	2176.45	1998.91	1696.58								YAL039C	810	0.81	2383.73	1350.08	4660.01	4166.63	1807.95	2686.97	2467.79	2094.54
YAL038W	774067	934887	629784	649372	837234	782320	983295	937546								YAL038W	847271	550841	774833	705379	784441	1.11141e+06	1.07464e+06	966941								YAL038W	1503	1.503	563720	366494	515524	469314	521917	739460	714996	643341
YAL037C-B	65	39	14	19	32	21	25	44								YAL037C-B	71.1471	22.979	17.2244	20.6387	29.9822	29.8338	27.3224	45.3795								YAL037C-B	975	0.975	72.9714	23.5682	17.6661	21.1679	30.751	30.5988	28.023	46.5431
YAL037C-A	1	0	1	0	1	1	1	1								YAL037C-A	1.09457	0	1.23031	0	0.936944	1.42066	1.0929	1.03135								YAL037C-A	93	0.093	11.7696	0	13.2292	0	10.0747	15.2759	11.7516	11.0898
YAL037W	80	89	148	146	79	84	101	103								YAL037W	87.5657	52.4393	182.087	158.592	74.0186	119.335	110.383	106.229								YAL037W	804	0.804	108.913	65.223	226.476	197.254	92.0629	148.427	137.292	132.126
YAL036C	3724	3364	3769	3944	4028	3958	4371	4139								YAL036C	4076.18	1982.09	4637.06	4284.16	3774.01	5622.96	4777.05	4268.77								YAL036C	1110	1.11	3672.24	1785.66	4177.53	3859.61	3400.01	5065.73	4303.65	3845.74
YAL035W	25182	22947	34496	39520	31814	30794	42132	38048								YAL035W	27563.5	13520.5	42440.9	42928.5	29807.9	43747.7	46045.9	39240.9								YAL035W	3009	3.009	9160.35	4493.35	14104.7	14266.7	9906.26	14538.9	15302.7	13041.2
YAL034C-B	2	2	10	13	4	0	4	2								YAL034C-B	2.18914	1.17841	12.3031	14.1212	3.74777	0	4.37158	2.06271								YAL034C-B	354	0.354	6.18402	3.32885	34.7547	39.8905	10.5869	0	12.3491	5.82685
YAL034W-A	184	254	338	382	170	198	269	228								YAL034W-A	201.401	149.658	415.846	414.947	159.28	281.29	293.989	235.149								YAL034W-A	870	0.87	231.495	172.021	477.984	476.95	183.081	323.322	337.918	270.286
YAL034C	1282	682	2747	2765	1016	1083	1659	1442								YAL034C	1403.24	401.838	3379.68	3003.48	951.935	1538.57	1813.11	1487.21								YAL034C	1242	1.242	1129.82	323.541	2721.16	2418.26	766.453	1238.78	1459.83	1197.43
YAL033W	684	1530	910	835	794	650	852	852								YAL033W	748.687	901.485	1119.59	907.017	743.933	923.427	931.148	878.713								YAL033W	522	0.522	1434.27	1726.98	2144.8	1737.58	1425.16	1769.02	1783.81	1683.36
YAL032C	1206	928	1737	1785	1137	1119	1498	1320								YAL032C	1320.05	546.783	2137.06	1938.95	1065.3	1589.71	1637.16	1361.39								YAL032C	1140	1.14	1157.94	479.634	1874.61	1700.84	934.478	1394.49	1436.1	1194.2
YAL031W-A	1	5	4	1	4	2	1	4								YAL031W-A	1.09457	2.94603	4.92126	1.08625	3.74777	2.84131	1.0929	4.12541								YAL031W-A	309	0.309	3.5423	9.53407	15.9264	3.51537	12.1287	9.19519	3.53688	13.3508
YAL031C	2058	1441	3125	3057	1950	1867	2885	2388								YAL031C	2252.63	849.045	3844.73	3320.66	1827.04	2652.37	3153.01	2462.87								YAL031C	2283	2.283	986.696	371.899	1684.07	1454.52	800.28	1161.79	1381.08	1078.79
YAL030W	865	1047	1039	992	747	664	805	796								YAL030W	946.804	616.898	1278.3	1077.56	699.897	943.316	879.781	820.957								YAL030W	354	0.354	2674.59	1742.65	3611.01	3043.95	1977.11	2664.73	2485.26	2319.09
YAL029C	5346	6706	9923	10713	6678	6775	9817	8763								YAL029C	5851.58	3951.21	12208.4	11637	6256.91	9624.95	10729	9037.75								YAL029C	4416	4.416	1325.09	894.749	2764.59	2635.18	1416.87	2179.56	2429.57	2046.59
YAL028W	303	162	829	775	280	281	439	432								YAL028W	331.655	95.4513	1019.93	841.842	262.344	399.204	479.781	445.545								YAL028W	1587	1.587	208.982	60.1458	642.679	530.461	165.308	251.547	302.32	280.746
YAL027W	451	897	880	898	490	427	681	578								YAL027W	493.651	528.518	1082.68	975.451	459.102	606.62	744.262	596.122								YAL027W	786	0.786	628.055	672.414	1377.45	1241.03	584.1	771.781	946.899	758.425
YAL026C-A	311	456	354	386	359	291	475	453								YAL026C-A	340.412	268.678	435.531	419.292	336.363	413.411	519.126	467.203								YAL026C-A	438	0.438	777.195	613.42	994.364	957.287	767.952	943.861	1185.22	1066.67
YAL026C	5823	5173	8158	8556	6725	6363	9455	8273								YAL026C	6373.69	3047.96	10036.9	9293.94	6300.95	9039.64	10333.3	8532.38								YAL026C	4068	4.068	1566.79	749.253	2467.28	2284.65	1548.91	2222.13	2540.15	2097.44
YAL025C	1920	2169	2895	3168	2121	2119	2884	2668								YAL025C	2101.58	1277.99	3561.76	3441.23	1987.26	3010.37	3151.91	2751.65								YAL025C	921	0.921	2281.84	1387.61	3867.28	3736.41	2157.72	3268.59	3422.27	2987.68
YAL024C	1539	1427	3112	3490	1759	1765	2898	2452								YAL024C	1684.54	840.797	3828.74	3791.01	1648.08	2507.46	3167.21	2528.88								YAL024C	4308	4.308	391.027	195.171	888.751	879.992	382.564	582.047	735.193	587.019
YAL023C	33903	50625	29504	29614	34774	33484	43334	41137								YAL023C	37109.2	29828.5	36299.2	32168.2	32581.3	47569.3	47359.6	42426.8								YAL023C	2280	2.28	16276	13082.7	15920.7	14108.8	14290	20863.7	20771.7	18608.2
YAL022C	3364	4635	4908	4850	3422	3439	4440	4040								YAL022C	3682.14	2730.97	6038.39	5268.3	3206.22	4885.64	4852.46	4166.67								YAL022C	1554	1.554	2369.46	1757.38	3885.71	3390.16	2063.21	3143.91	3122.56	2681.25
YAL021C	12023	9040	14562	15566	11554	12565	16330	15043								YAL021C	13160	5326.42	17915.8	16908.5	10825.4	17850.5	17847	15514.6								YAL021C	2514	2.514	5234.7	2118.7	7126.43	6725.75	4306.06	7100.46	7099.04	6171.3
YAL020C	581	1058	693	677	591	517	746	626								YAL020C	635.946	623.38	852.608	735.39	553.734	734.479	815.301	645.627								YAL020C	1002	1.002	634.676	622.135	850.906	733.922	552.628	733.013	813.673	644.338
YAL019W-A	14	16	14	19	19	30	24	28								YAL019W-A	15.324	9.42729	17.2244	20.6387	17.8019	42.6197	26.2295	28.8779								YAL019W-A	570	0.57	26.8842	16.5391	30.2183	36.2083	31.2315	74.7714	46.0167	50.663
YAL019W	5614	4307	7853	8894	6112	6769	9040	8276								YAL019W	6144.92	2537.71	9661.66	9661.09	5726.6	9616.42	9879.78	8535.48								YAL019W	3396	3.396	1809.46	747.264	2845.01	2844.84	1686.28	2831.69	2909.24	2513.39
YAL018C	4	24	14	31	20	11	26	22								YAL018C	4.37828	14.1409	17.2244	33.6737	18.7389	15.6272	28.4153	22.6898								YAL018C	978	0.978	4.47677	14.459	17.6119	34.4312	19.1604	15.9788	29.0545	23.2002
YAL017W	3770	2593	9882	9839	3633	3315	5506	4739								YAL017W	4126.53	1527.81	12158	10687.6	3403.92	4709.48	6017.49	4887.58								YAL017W	4071	4.071	1013.64	375.291	2986.48	2625.3	836.138	1156.84	1478.13	1200.59
YAL016C-B	0	0	1	0	0	0	0	0								YAL016C-B	0	0	1.23031	0	0	0	0	0								YAL016C-B	186	0.186	0	0	6.6146	0	0	0	0	0
YAL016C-A	18	22	12	14	11	5	10	7								YAL016C-A	19.7023	12.9625	14.7638	15.2075	10.3064	7.10328	10.929	7.21947								YAL016C-A	315	0.315	62.5469	41.1509	46.8691	48.2777	32.7187	22.5501	34.6951	22.919
YAL016W	7220	9139	11632	12106	7786	6676	9523	8649								YAL016W	7902.8	5384.75	14311	13150.1	7295.04	9484.3	10407.7	8920.17								YAL016W	1908	1.908	4141.93	2822.2	7500.54	6892.1	3823.4	4970.81	5454.74	4675.14
YAL015C	642	702	834	945	637	508	723	670								YAL015C	702.715	413.622	1026.08	1026.5	596.833	721.693	790.164	691.007								YAL015C	1200	1.2	585.595	344.685	855.069	855.42	497.361	601.411	658.47	575.839
YAL014C	1905	1479	1839	2007	1650	1556	2139	1865								YAL014C	2085.16	871.435	2262.55	2180.1	1545.96	2210.54	2337.7	1923.47								YAL014C	768	0.768	2715.05	1134.68	2946.03	2838.67	2012.96	2878.31	3043.89	2504.52
YAL013W	2323	2220	2930	3002	2156	2065	2923	2519								YAL013W	2542.69	1308.04	3604.82	3260.92	2020.05	2933.66	3194.54	2597.98								YAL013W	1218	1.218	2087.59	1073.92	2959.62	2677.27	1658.5	2408.58	2622.77	2132.99
YAL011W	463	287	755	867	413	453	666	580								YAL011W	506.786	169.102	928.888	941.777	386.958	643.557	727.869	598.185								YAL011W	1878	1.878	269.854	90.0437	494.615	501.479	206.048	342.682	387.577	318.522
YAL010C	1117	1137	1968	2189	1273	1142	1646	1494								YAL010C	1222.64	669.927	2421.26	2377.8	1192.73	1622.39	1798.91	1540.84								YAL010C	1482	1.482	824.99	452.042	1633.78	1604.45	804.811	1094.73	1213.84	1039.7
YAL009W	789	727	872	890	716	618	886	752								YAL009W	863.616	428.353	1072.83	966.761	670.852	877.966	968.306	775.578								YAL009W	780	0.78	1107.2	549.17	1375.43	1239.44	860.066	1125.6	1241.42	994.33
YAL008W	241	472	457	461	251	177	309	255								YAL008W	263.792	278.105	562.254	500.76	235.173	251.456	337.705	262.995								YAL008W	597	0.597	441.862	465.838	941.799	838.795	393.924	421.2	565.67	440.528
YAL007C	5904	7643	6518	6229	5571	5268	7473	6705								YAL007C	6462.35	4503.3	8019.19	6766.24	5219.71	7484.02	8167.21	6915.22								YAL007C	648	0.648	9972.76	6949.54	12375.3	10441.7	8055.11	11549.4	12603.7	10671.6
YAL005C	88173	83427	113806	115377	69984	61293	103151	89488								YAL005C	96511.6	49155.7	140017	125328	65571.1	87076.3	112733	92293.7								YAL005C	1929	1.929	50031.9	25482.5	72585.4	64970.5	33992.3	45140.6	58441.3	47845.4
YAL004W	2	1	0	0	0	1	0	1								YAL004W	2.18914	0.589206	0	0	0	1.42066	0	1.03135								YAL004W	648	0.648	3.37831	0.909268	0	0	0	2.19237	0	1.59159
YAL003W	44438	44124	31079	31653	47789	42881	50062	47096								YAL003W	48640.5	25998.1	38237	34383	44775.6	60919.2	54712.6	48572.6								YAL003W	621	0.621	78326.2	41864.9	61573.2	55367.2	72102.4	98098.5	88104	78216.8
YAL002W	2304	1305	2871	3009	2546	2270	3322	2910								YAL002W	2521.89	768.914	3532.23	3268.52	2385.46	3224.89	3630.6	3001.24								YAL002W	3825	3.825	659.318	201.023	923.46	854.515	623.649	843.108	949.177	784.637
YAL001C	862	1289	1663	1749	1000	838	1450	1285								YAL001C	943.52	759.486	2046.01	1899.85	936.944	1190.51	1584.7	1325.29								YAL001C	3483	3.483	270.893	218.055	587.429	545.463	269.005	341.806	454.981	380.502
YAR002W	4776	4540	6844	7269	4753	4626	6605	5982								YAR002W	5227.67	2674.99	8420.28	7895.94	4453.29	6571.96	7218.58	6169.55								YAR002W	1620	1.62	3226.96	1651.23	5197.7	4874.04	2748.95	4056.76	4455.91	3808.37
YAR002C-A	6437	9049	7023	7048	5897	5430	7121	6791								YAR002C-A	7045.75	5331.72	8640.5	7655.88	5525.16	7714.16	7782.51	7003.92								YAR002C-A	660	0.66	10675.4	8078.37	13091.7	11599.8	8371.45	11688.1	11791.7	10612
YAR003W	1463	2562	1768	1774	1488	1251	1829	1675								YAR003W	1601.36	1509.55	2175.2	1927	1394.17	1777.24	1998.91	1727.52								YAR003W	1281	1.281	1250.08	1178.41	1698.05	1504.3	1088.35	1387.39	1560.43	1348.57
YAR007C	4838	7286	6825	7323	5264	4610	6831	6071								YAR007C	5295.53	4292.95	8396.9	7954.59	4932.07	6549.23	7465.57	6261.34								YAR007C	1866	1.866	2837.91	2300.62	4499.95	4262.91	2643.13	3509.77	4000.84	3355.49
YAR008W	331	569	475	503	369	289	458	424								YAR008W	362.303	335.258	584.4	546.383	345.732	410.57	500.546	437.294								YAR008W	828	0.828	437.564	404.901	705.797	659.883	417.551	495.857	604.525	528.133
YAR009C	46788	23363	86802	98816	77388	86415	139257	111035								YAR009C	51212.8	13765.6	106794	107339	72508.2	122766	152193	114516								YAR009C	3591	3.591	14261.4	3833.37	29739.3	29891	20191.6	34187.1	42381.9	31889.8
YAR010C	11928	9784	18075	19529	20806	20935	28914	24529								YAR010C	13056	5764.79	22237.9	21213.3	19494.1	29741.4	31600	25298.1								YAR010C	1323	1.323	9868.51	4357.36	16808.7	16034.3	14734.7	22480.3	23885.1	19121.7
YAR014C	3171	1973	5025	5342	3300	3189	4386	3981								YAR014C	3470.88	1162.5	6182.33	5802.74	3091.91	4530.47	4793.44	4105.82								YAR014C	2130	2.13	1629.52	545.776	2902.5	2724.29	1451.6	2126.98	2250.44	1927.61
YAR015W	2375	2566	4090	4135	2731	2587	3228	3079								YAR015W	2599.61	1511.9	5031.99	4491.64	2558.79	3675.24	3527.87	3175.54								YAR015W	921	0.921	2822.59	1641.59	5463.61	4876.91	2778.28	3990.49	3830.48	3447.92
YAR018C	1370	767	2758	2774	1518	1411	1998	1746								YAR018C	1499.56	451.921	3393.21	3013.25	1422.28	2004.55	2183.61	1800.74								YAR018C	1308	1.308	1146.45	345.505	2594.2	2303.71	1087.37	1532.53	1669.42	1376.71
YAR019C	1714	1209	3916	4028	1749	1840	2548	2238								YAR019C	1876.09	712.35	4817.91	4375.41	1638.71	2614.01	2784.7	2308.17								YAR019C	2925	2.925	641.4	243.538	1647.15	1495.87	560.244	893.678	952.034	789.117
YAR019W-A	3	8	15	9	1	1	0	4								YAR019W-A	3.28371	4.71365	18.4547	9.77623	0.936944	1.42066	0	4.12541								YAR019W-A	333	0.333	9.861	14.1551	55.4196	29.3581	2.81364	4.26624	0	12.3886
YAR020C	49	37	77	63	44	47	69	45								YAR020C	53.634	21.8006	94.7343	68.4336	41.2255	66.7708	75.4098	46.4109								YAR020C	168	0.168	319.25	129.766	563.894	407.343	245.39	397.446	448.868	276.255
YAR023C	151	183	220	205	127	107	206	147								YAR023C	165.28	107.825	270.669	222.681	118.992	152.01	225.137	151.609								YAR023C	540	0.54	306.074	199.675	501.239	412.372	220.355	281.5	416.92	280.757
YAR027W	1457	2819	3218	3319	1439	1349	1810	1553								YAR027W	1594.79	1660.97	3959.15	3605.26	1348.26	1916.47	1978.14	1601.69								YAR027W	708	0.708	2252.53	2346	5592.02	5092.17	1904.32	2706.87	2793.99	2262.28
YAR028W	379	683	777	874	487	439	573	491								YAR028W	414.842	402.428	955.955	949.381	456.292	623.668	626.23	506.394								YAR028W	705	0.705	588.429	570.819	1355.96	1346.64	647.222	884.636	888.269	718.29
YAR029W	53	82	70	71	57	51	63	63								YAR029W	58.0123	48.3149	86.122	77.1236	53.4058	72.4535	68.8525	64.9752								YAR029W	225	0.225	257.832	214.733	382.765	342.772	237.359	322.015	306.011	288.779
YAR030C	23	20	18	23	22	30	42	29								YAR030C	25.1751	11.7841	22.1457	24.9837	20.6128	42.6197	45.9016	29.9092								YAR030C	342	0.342	73.6115	34.4565	64.7534	73.0518	60.2712	124.619	134.215	87.4539
YAR031W	141	198	247	227	141	125	144	163								YAR031W	154.335	116.663	303.888	246.578	132.109	177.582	157.377	168.111								YAR031W	897	0.897	172.056	130.059	338.782	274.892	147.279	197.973	175.448	187.414
YAR033W	449	588	753	729	403	379	514	470								YAR033W	491.462	346.453	926.427	791.875	377.588	538.429	561.749	484.736								YAR033W	705	0.705	697.11	491.423	1314.08	1123.23	535.586	763.729	796.807	687.569
YAR035W	288	645	658	816	296	318	362	359								YAR035W	315.236	380.038	809.547	886.378	277.335	451.769	395.628	370.256								YAR035W	2064	2.064	152.731	184.127	392.223	429.447	134.368	218.88	191.68	179.387
YAR035C-A	0	0	1	1	0	0	0	0								YAR035C-A	0	0	1.23031	1.08625	0	0	0	0								YAR035C-A	81	0.081	0	0	15.1891	13.4105	0	0	0	0
YAR042W	4612	2620	8333	9245	4691	4866	7788	6550								YAR042W	5048.16	1543.72	10252.2	10042.4	4395.2	6912.91	8511.48	6755.36								YAR042W	3567	3.567	1415.24	432.778	2874.18	2815.35	1232.18	1938.02	2386.17	1893.85
YAR047C	0	0	0	0	0	0	0	0								YAR047C	0	0	0	0	0	0	0	0								YAR047C	321	0.321	0	0	0	0	0	0	0	0
YAR050W	279	123	644	651	246	389	443	378								YAR050W	305.385	72.4723	792.323	707.148	230.488	552.635	484.153	389.851								YAR050W	4614	4.614	66.1867	15.707	171.721	153.261	49.9541	119.774	104.931	84.4932
YAR053W	13	26	7	2	7	3	12	17								YAR053W	14.2294	15.3193	8.6122	2.1725	6.55861	4.26197	13.1148	17.533								YAR053W	297	0.297	47.9105	51.5803	28.9973	7.3148	22.0828	14.3501	44.1574	59.0337
YAR060C	2	0	6	16	4	7	5	1								YAR060C	2.18914	0	7.38189	17.38	3.74777	9.94459	5.46448	1.03135								YAR060C	336	0.336	6.5153	0	21.9699	51.7261	11.1541	29.597	16.2633	3.0695
YAR064W	0	0	1	2	4	3	3	2								YAR064W	0	0	1.23031	2.1725	3.74777	4.26197	3.27869	2.06271								YAR064W	300	0.3	0	0	4.10105	7.24165	12.4926	14.2066	10.929	6.87569
YAR066W	115	128	29	40	110	140	137	124								YAR066W	125.876	75.4183	35.6791	43.4499	103.064	198.892	149.727	127.888								YAR066W	612	0.612	205.679	123.233	58.2992	70.9966	168.405	324.987	244.652	208.967
YAR068W	335	304	120	184	247	381	363	401								YAR068W	366.681	179.119	147.638	199.87	231.425	541.27	396.721	413.573								YAR068W	486	0.486	754.488	368.557	303.781	411.254	476.183	1113.72	816.299	850.972
YAR069C	6	7	3	3	10	4	7	6								YAR069C	6.56743	4.12444	3.69094	3.25874	9.36944	5.68263	7.65027	6.18812								YAR069C	294	0.294	22.3382	14.0287	12.5542	11.0842	31.8688	19.3287	26.0213	21.048
YAR070C	18	33	18	9	27	23	27	20								YAR070C	19.7023	19.4438	22.1457	9.77623	25.2975	32.6751	29.5082	20.6271								YAR070C	300	0.3	65.6743	64.8126	73.8189	32.5874	84.3249	108.917	98.3607	68.7569
YAR071W	10045	11823	12752	12671	18751	17775	18250	20292								YAR071W	10995	6966.18	15689	13763.8	17568.6	25252.2	19945.4	20928.2								YAR071W	1404	1.404	7831.17	4961.67	11174.5	9803.31	12513.3	17985.9	14206.1	14906.1
YAR073W	163	247	127	141	163	183	178	176								YAR073W	178.415	145.534	156.25	153.161	152.722	259.98	194.536	181.518								YAR073W	1212	1.212	147.207	120.077	128.919	126.37	126.008	214.505	160.508	149.767
YAR075W	151	143	96	106	131	146	146	142								YAR075W	165.28	84.2564	118.11	115.142	122.74	207.416	159.563	146.452								YAR075W	474	0.474	348.692	177.756	249.178	242.916	258.944	437.586	336.63	308.971
Q0010	3	10	7	6	8	3	6	1								Q0010	3.28371	5.89206	8.6122	6.51749	7.49555	4.26197	6.55738	1.03135								Q0010	387	0.387	8.48505	15.225	22.2538	16.8411	19.3683	11.0128	16.9441	2.665
Q0017	0	0	0	0	0	0	0	0								Q0017	0	0	0	0	0	0	0	0								Q0017	162	0.162	0	0	0	0	0	0	0	0
Q0032	13	72	18	27	28	14	60	42								Q0032	14.2294	42.4228	22.1457	29.3287	26.2344	19.8892	65.5738	43.3168								Q0032	291	0.291	48.8984	145.783	76.102	100.786	90.1527	68.3477	225.339	148.855
Q0045	7625	24876	12947	9417	8641	7406	11692	11207								Q0045	8346.1	14657.1	15928.9	10229.2	8096.13	10521.4	12778.1	11558.4								Q0045	1605	1.605	5200.06	9132.14	9924.54	6373.33	5044.32	6555.38	7961.46	7201.48
Q0070	13	42	12	16	16	7	21	22								Q0070	14.2294	24.7466	14.7638	17.38	14.9911	9.94459	22.9508	22.6898								Q0070	1893	1.893	7.51686	13.0727	7.79914	9.18118	7.91923	5.25335	12.124	11.9861
Q0065	23	171	114	94	105	56	125	133								Q0065	25.1751	100.754	140.256	102.107	98.3791	79.5568	136.612	137.17								Q0065	1671	1.671	15.0659	60.2957	83.9353	61.1055	58.8744	47.6103	81.7547	82.0885
Q0060	203	744	492	437	309	188	492	431								Q0060	222.198	438.369	605.315	474.69	289.516	267.083	537.705	444.513								Q0060	1248	1.248	178.043	351.257	485.028	380.361	231.984	214.009	430.853	356.18
Q0055	30031	83903	52073	33250	32511	24679	44434	44823								Q0055	32871.1	49436.1	64066.2	36117.7	30461	35060.4	48561.7	46228.3								Q0055	2565	2.565	12815.2	19273.3	24977.1	14081	11875.6	13668.8	18932.5	18022.7
Q0050	12555	42860	25056	18562	20387	10020	26640	24638								Q0050	13742.3	25253.4	30826.8	20162.9	19101.5	14235	29114.8	25410.5								Q0050	2505	2.505	5485.96	10081.2	12306.1	8049.08	7625.34	5682.63	11622.7	10143.9
Q0075	90	399	290	221	152	90	247	203								Q0075	98.5114	235.093	356.791	240.061	142.415	127.859	269.945	209.365								Q0075	1065	1.065	92.499	220.745	335.015	225.409	133.723	120.055	253.47	196.587
Q0080	29	164	31	76	46	22	49	39								Q0080	31.7426	96.6297	38.1398	82.5549	43.0994	31.2544	53.5519	40.2228								Q0080	147	0.147	215.936	657.345	259.454	561.598	293.193	212.615	364.299	273.624
Q0085	627	4266	1422	1107	1424	714	1745	1392								Q0085	686.296	2513.55	1749.51	1202.48	1334.21	1014.35	1907.1	1435.64								Q0085	780	0.78	879.867	3222.5	2242.96	1541.64	1710.52	1300.45	2445	1840.57
Q0092	0	0	0	0	0	0	0	0								Q0092	0	0	0	0	0	0	0	0								Q0092	141	0.141	0	0	0	0	0	0	0	0
Q0105	12554	34379	16132	11303	13167	10467	16699	17117								Q0105	13741.2	20256.3	19847.4	12277.9	12336.7	14870	18250.3	17653.7								Q0105	1158	1.158	11866.4	17492.5	17139.4	10602.6	10653.5	12841.1	15760.2	15245
Q0120	189	743	369	348	598	247	610	551								Q0120	206.874	437.78	453.986	378.014	560.292	350.902	666.667	568.276								Q0120	1917	1.917	107.915	228.367	236.821	197.191	292.276	183.048	347.766	296.44
Q0115	12	31	18	25	17	10	21	13								Q0115	13.1349	18.2654	22.1457	27.1562	15.928	14.2066	22.9508	13.4076								Q0115	1554	1.554	8.45229	11.7538	14.2508	17.475	10.2497	9.14193	14.7689	8.62779
Q0110	16	98	46	21	34	15	42	44								Q0110	17.5131	57.7422	56.5945	22.8112	31.8561	21.3098	45.9016	45.3795								Q0110	1272	1.272	13.7682	45.3948	44.4925	17.9333	25.0441	16.753	36.0862	35.6757
Q0130	27130	75188	44013	30478	29327	25099	36189	34592								Q0130	29695.7	44301.2	54149.9	33106.7	27477.7	35657.1	39550.8	35676.6								Q0130	231	0.231	128553	191780	234415	143319	118951	154360	171216	154444
Q0140	27	125	59	33	71	24	62	51								Q0140	29.5534	73.6507	72.5886	35.8462	66.523	34.0958	67.7596	52.599								Q0140	1197	1.197	24.6896	61.5294	60.6421	29.9467	55.5748	28.4843	56.6078	43.9424
Q0142	4	11	1	3	3	10	11	8								Q0142	4.37828	6.48126	1.23031	3.25874	2.81083	14.2066	12.0219	8.25083								Q0142	177	0.177	24.7361	36.6173	6.95093	18.411	15.8804	80.2631	67.9201	46.6148
Q0143	4	4	5	6	7	2	5	12								Q0143	4.37828	2.35682	6.15157	6.51749	6.55861	2.84131	5.46448	12.3762								Q0143	153	0.153	28.6162	15.4041	40.2064	42.598	42.8667	18.5707	35.7156	80.8904
Q0144	0	0	0	0	0	0	0	0								Q0144	0	0	0	0	0	0	0	0								Q0144	330	0.33	0	0	0	0	0	0	0	0
Q0160	2100	6186	3628	2454	2790	2217	3431	3140								Q0160	2298.6	3644.83	4463.58	2665.65	2614.07	3149.6	3749.73	3238.45								Q0160	708	0.708	3246.61	5148.06	6304.5	3765.05	3692.19	4448.58	5296.22	4574.08
Q0182	144	350	146	120	141	114	162	193								Q0182	157.618	206.222	179.626	130.35	132.109	161.955	177.049	199.051								Q0182	405	0.405	389.181	509.19	443.521	321.851	326.195	399.888	437.158	491.484
Q0250	10695	31565	15542	10561	13371	12100	16898	16191								Q0250	11706.4	18598.3	19121.6	11471.9	12527.9	17189.9	18467.8	16698.6								Q0250	756	0.756	15484.7	24600.9	25293.1	15174.4	16571.3	22738	24428.3	22088.1
Q0255	80	557	320	203	163	104	275	233								Q0255	87.5657	328.188	393.701	220.508	152.722	147.748	300.546	240.305								Q0255	1419	1.419	61.7094	231.281	277.449	155.397	107.626	104.121	211.802	169.348
Q0275	16989	49903	26264	20239	18038	16041	24422	22371								Q0275	18595.7	29403.1	32313	21984.6	16900.6	22788.7	26690.7	23072.4								Q0275	810	0.81	22957.6	36300.2	39892.6	27141.5	20864.9	28134.3	32951.5	28484.4
Q0297	398	1063	589	498	438	350	458	390								Q0297	435.639	626.326	724.656	540.952	410.381	497.23	500.546	402.228								Q0297	156	0.156	2792.56	4014.91	4645.23	3467.64	2630.65	3187.37	3208.63	2578.38
YER054C	83	48	1549	1651	90	69	250	166								YER054C	90.8494	28.2819	1905.76	1793.4	84.3249	98.0253	273.224	171.205								YER054C	1647	1.647	55.1605	17.1718	1157.11	1088.89	51.1991	59.5175	165.892	103.949
YER114C	4800	2581	6331	6956	4879	5198	6923	6215								YER114C	5253.94	1520.74	7789.12	7555.94	4571.35	7384.57	7566.12	6409.86								YER114C	3123	3.123	1682.34	486.948	2494.12	2419.45	1463.77	2364.58	2422.71	2052.47
YER169W	2331	1671	3453	3754	2281	2319	2970	2724								YER169W	2551.44	984.563	4248.28	4077.78	2137.17	3294.5	3245.9	2809.41								YER169W	2391	2.391	1067.1	411.779	1776.78	1705.47	893.839	1377.88	1357.55	1174.99
YEL077C	1655	641	1963	2015	1548	1712	2564	2299								YEL077C	1811.51	377.681	2415.11	2188.79	1450.39	2432.16	2802.19	2371.08								YEL077C	3834	3.834	472.487	98.5083	629.919	570.889	378.297	634.367	730.878	618.435
YEL077W-A	10	11	22	25	8	30	23	14								YEL077W-A	10.9457	6.48126	27.0669	27.1562	7.49555	42.6197	25.1366	14.4389								YEL077W-A	483	0.483	22.6619	13.4188	56.0392	56.224	15.5187	88.2395	52.0427	29.8943
YEL076C-A	169	113	202	244	163	163	226	265								YEL076C-A	184.982	66.5802	248.524	265.045	152.722	231.567	246.995	273.309								YEL076C-A	651	0.651	284.151	102.274	381.757	407.134	234.596	355.71	379.408	419.829
YEL076C	38	14	47	37	39	43	48	44								YEL076C	41.5937	8.24888	57.8248	40.1912	36.5408	61.0882	52.459	45.3795								YEL076C	651	0.651	63.892	12.6711	88.8246	61.7376	56.1303	93.8375	80.5822	69.7074
YEL075W-A	142	98	155	144	125	145	194	169								YEL075W-A	155.429	57.7422	190.699	156.42	117.118	205.995	212.022	174.299								YEL075W-A	612	0.612	253.969	94.3499	311.599	255.588	191.369	336.593	346.441	284.802
YEL075C	31	24	47	35	58	30	57	41								YEL075C	33.9317	14.1409	57.8248	38.0187	54.3427	42.6197	62.2951	42.2855								YEL075C	369	0.369	91.9558	38.3223	156.707	103.032	147.27	115.501	168.821	114.595
YEL074W	63	53	57	52	54	72	85	92								YEL074W	68.958	31.2279	70.128	56.4849	50.595	102.287	92.8962	94.8845								YEL074W	339	0.339	203.416	92.1177	206.867	166.622	149.248	301.732	274.03	279.895
YEL073C	97	99	330	360	104	127	139	153								YEL073C	106.173	58.3314	406.004	391.049	97.4421	180.423	151.913	157.797								YEL073C	324	0.324	327.696	180.035	1253.1	1206.94	300.747	556.862	468.866	487.028
YEL072W	350	839	501	537	368	340	527	479								YEL072W	383.1	494.344	616.388	583.315	344.795	483.023	575.956	494.018								YEL072W	696	0.696	550.431	710.264	885.615	838.097	495.396	693.999	827.523	709.796
YEL071W	11458	10776	12092	12525	14251	11761	15691	14152								YEL071W	12541.6	6349.28	14877	13605.3	13352.4	16708.3	17148.6	14595.7								YEL071W	1491	1.491	8411.53	4258.4	9977.85	9124.92	8955.32	11206.1	11501.4	9789.21
YEL070W	37	34	413	411	25	41	57	46								YEL070W	40.4991	20.033	508.12	446.448	23.4236	58.2469	62.2951	47.4422								YEL070W	1509	1.509	26.8384	13.2757	336.726	295.857	15.5226	38.5997	41.2824	31.4395
YEL069C	6	1	10	12	2	3	1	2								YEL069C	6.56743	0.589206	12.3031	13.035	1.87389	4.26197	1.0929	2.06271								YEL069C	1695	1.695	3.87459	0.347614	7.2585	7.69025	1.10554	2.51444	0.644777	1.21694
YEL068C	684	1146	670	671	650	635	806	714								YEL068C	748.687	675.23	824.311	728.872	609.013	902.117	880.874	736.386								YEL068C	333	0.333	2248.31	2027.72	2475.41	2188.81	1828.87	2709.06	2645.27	2211.37
YEL067C	134	143	185	190	129	98	146	148								YEL067C	146.673	84.2564	227.608	206.387	120.866	139.224	159.563	152.64								YEL067C	588	0.588	249.443	143.293	387.089	350.999	205.554	236.776	271.365	259.592
YEL066W	806	1495	1056	1013	793	773	911	804								YEL066W	882.224	880.863	1299.21	1100.37	742.996	1098.17	995.628	829.208								YEL066W	540	0.54	1633.75	1631.23	2405.95	2037.72	1375.92	2033.64	1843.76	1535.57
YEL065W	2586	2521	3729	5468	1743	2605	4268	3261								YEL065W	2830.56	1485.39	4587.84	5939.6	1633.09	3700.81	4664.48	3363.24								YEL065W	1887	1.887	1500.03	787.169	2431.29	3147.64	865.444	1961.21	2471.9	1782.32
YEL064C	625	707	916	944	566	523	763	626								YEL064C	684.107	416.568	1126.97	1025.42	530.31	743.003	833.88	645.627								YEL064C	1443	1.443	474.087	288.682	780.99	710.616	367.505	514.902	577.879	447.42
YEL063C	3351	2065	3315	3649	3692	3500	4505	4143								YEL063C	3667.91	1216.71	4078.49	3963.72	3459.2	4972.3	4923.5	4272.9								YEL063C	1773	1.773	2068.76	686.244	2300.34	2235.6	1951.04	2804.45	2776.93	2409.98
YEL062W	1204	1770	2568	2546	1265	1201	1781	1706								YEL062W	1317.86	1042.89	3159.45	2765.59	1185.23	1706.21	1946.45	1759.49								YEL062W	1848	1.848	713.13	564.337	1709.66	1496.53	641.36	923.273	1053.27	952.104
YEL061C	850	918	1941	2357	1127	993	1604	1433								YEL061C	930.385	540.891	2388.04	2560.29	1055.94	1410.71	1753.01	1477.93								YEL061C	3003	3.003	309.819	180.117	795.219	852.576	351.627	469.767	583.751	492.151
YEL060C	12176	12264	37137	42162	10406	10089	15800	13211								YEL060C	13327.5	7226.02	45690.2	45798.4	9749.84	14333	17267.8	13625.2								YEL060C	1908	1.908	6985.06	3787.22	23946.6	24003.4	5109.98	7512.06	9050.19	7141.09
YEL059C-A	315	554	546	537	311	264	311	328								YEL059C-A	344.79	326.42	671.752	583.315	291.389	375.053	339.891	338.284								YEL059C-A	225	0.225	1532.4	1450.76	2985.56	2592.51	1295.06	1666.9	1510.63	1503.48
YEL059W	10	8	19	7	13	4	10	9								YEL059W	10.9457	4.71365	23.376	7.60374	12.1803	5.68263	10.929	9.28218								YEL059W	309	0.309	35.423	15.2545	75.6504	24.6076	39.4183	18.3904	35.3688	30.0394
YEL058W	5765	7964	11480	11471	6777	6193	8124	7618								YEL058W	6310.2	4692.43	14124	12460.4	6349.67	8798.12	8878.69	7856.85								YEL058W	1674	1.674	3769.53	2803.13	8437.29	7443.46	3793.11	5255.75	5303.88	4693.46
YEL057C	73	89	143	143	78	67	70	86								YEL057C	79.9037	52.4393	175.935	155.333	73.0816	95.184	76.5027	88.6964								YEL057C	702	0.702	113.823	74.6999	250.62	221.273	104.105	135.59	108.978	126.348
YEL056W	2694	2622	3839	3795	2885	2541	3762	3254								YEL056W	2948.77	1544.9	4723.18	4122.31	2703.08	3609.89	4111.48	3356.02								YEL056W	1206	1.206	2445.09	1281.01	3916.4	3418.17	2241.36	2993.27	3409.18	2782.77
YEL055C	7478	9936	8323	9482	9471	8983	12128	10931								YEL055C	8185.2	5854.35	10239.9	10299.8	8873.79	12761.8	13254.6	11273.7								YEL055C	3069	3.069	2667.06	1907.58	3336.56	3356.08	2891.43	4158.28	4318.88	3673.42
YEL054C	50619	88488	45590	43920	52014	47664	59264	57507								YEL054C	55406.1	52137.6	56090.1	47708	48734.2	67714.2	64769.4	59310								YEL054C	498	0.498	111257	104694	112631	95799.2	97859.8	135972	130059	119096
YEL053W-A	10	1	2	5	3	0	2	2								YEL053W-A	10.9457	0.589206	2.46063	5.43124	2.81083	0	2.18579	2.06271								YEL053W-A	348	0.348	31.4532	1.69312	7.07078	15.607	8.0771	0	6.28101	5.92732
YEL053C	2439	2381	3324	3224	2638	2563	3636	3226								YEL053C	2669.66	1402.9	4089.57	3502.06	2471.66	3641.14	3973.77	3327.15								YEL053C	2202	2.202	1212.38	637.102	1857.21	1590.4	1122.46	1653.56	1804.62	1510.97
YEL052W	1982	2011	2389	2245	1780	1736	2556	2205								YEL052W	2169.44	1184.89	2939.22	2438.63	1667.76	2466.26	2793.44	2274.13								YEL052W	1530	1.53	1417.93	774.44	1921.06	1593.87	1090.04	1611.93	1825.78	1486.36
YEL051W	6199	11284	7671	7268	6688	5907	7727	7468								YEL051W	6785.25	6648.6	9437.75	7894.85	6266.28	8391.82	8444.81	7702.15								YEL051W	771	0.771	8800.58	8623.34	12240.9	10239.8	8127.47	10884.3	10953.1	9989.81
YEL050W-A	2	7	0	0	1	4	5	3								YEL050W-A	2.18914	4.12444	0	0	0.936944	5.68263	5.46448	3.09406								YEL050W-A	192	0.192	11.4018	21.4815	0	0	4.87992	29.597	28.4608	16.1149
YEL050C	2240	2335	3025	3075	2066	2009	2703	2298								YEL050C	2451.84	1375.8	3721.7	3340.21	1935.73	2854.1	2954.1	2370.05								YEL050C	1182	1.182	2074.31	1163.96	3148.65	2825.9	1637.67	2414.64	2499.24	2005.12
YEL049W	14	23	121	149	25	33	39	18								YEL049W	15.324	13.5517	148.868	161.851	23.4236	46.8817	42.623	18.5644								YEL049W	363	0.363	42.2149	37.3326	410.105	445.87	64.5278	129.151	117.419	51.1415
YEL048C	362	888	337	361	458	442	508	529								YEL048C	396.235	523.215	414.616	392.136	429.12	627.93	555.191	545.586								YEL048C	459	0.459	863.256	1139.9	903.303	854.326	934.902	1368.04	1209.57	1188.64
YEL047C	5255	6928	7801	7874	5752	4910	6405	6136								YEL047C	5751.97	4082.02	9597.69	8553.12	5389.3	6975.42	7000	6328.38								YEL047C	1413	1.413	4070.75	2888.9	6792.42	6053.16	3814.08	4936.6	4954	4478.69
YEL046C	19613	24300	18728	20440	19561	19075	23889	21390								YEL046C	21467.8	14317.7	23041.3	22202.9	18327.6	27099	26108.2	22060.6								YEL046C	1164	1.164	18443.1	12300.4	19795	19074.7	15745.3	23280.9	22429.7	18952.4
YEL045C	162	157	130	219	158	130	131	101								YEL045C	177.32	92.5053	159.941	237.888	148.037	184.685	143.169	104.167								YEL045C	426	0.426	416.245	217.149	375.448	558.423	347.505	433.534	336.078	244.523
YEL044W	806	1614	718	689	947	803	962	841								YEL044W	882.224	950.978	883.366	748.425	887.286	1140.79	1051.37	867.368								YEL044W	501	0.501	1760.93	1898.16	1763.21	1493.86	1771.03	2277.02	2098.54	1731.27
YEL043W	6378	3408	6969	7128	6207	6561	8875	7843								YEL043W	6981.17	2008.01	8574.06	7742.78	5815.61	9320.93	9699.45	8088.9								YEL043W	2871	2.871	2431.62	699.412	2986.44	2696.89	2025.64	3246.58	3378.42	2817.45
YEL042W	14522	17260	13416	13175	15662	16407	20726	18796								YEL042W	15895.4	10169.7	16505.9	14311.3	14674.4	23308.7	22651.4	19385.3								YEL042W	1557	1.557	10209	6531.59	10601.1	9191.6	9424.8	14970.3	14548.1	12450.4
YEL041W	219	197	501	503	180	156	285	175								YEL041W	239.711	116.074	616.388	546.383	168.65	221.622	311.475	180.487								YEL041W	1488	1.488	161.096	78.0064	414.239	367.193	113.34	148.94	209.325	121.295
YEL040W	24210	21863	29530	32233	29952	29007	35592	33234								YEL040W	26499.6	12881.8	36331.2	35013	28063.3	41209	38898.4	34276								YEL040W	1404	1.404	18874.3	9175.08	25876.9	24938.1	19988.1	29351.1	27705.4	24413.1
YEL039C	81	120	517	534	71	51	90	97								YEL039C	88.6602	70.7047	636.073	580.056	66.523	72.4535	98.3607	100.041								YEL039C	342	0.342	259.24	206.739	1859.86	1696.07	194.512	211.852	287.604	292.518
YEL038W	1353	1731	1230	1250	1275	1128	1423	1270								YEL038W	1480.95	1019.92	1513.29	1357.81	1194.6	1602.5	1555.19	1309.82								YEL038W	684	0.684	2165.14	1491.1	2212.41	1985.1	1746.5	2342.84	2273.67	1914.94
YEL037C	5596	5217	5281	5605	5933	5782	6890	6072								YEL037C	6125.22	3073.89	6497.29	6088.42	5558.89	8214.23	7530.05	6262.38								YEL037C	1197	1.197	5117.14	2567.99	5427.98	5086.4	4644.02	6862.35	6290.77	5231.73
YEL036C	4807	4015	6975	7317	4964	4854	6058	5605								YEL036C	5261.6	2365.66	8581.45	7948.08	4650.99	6895.87	6620.77	5780.73								YEL036C	1503	1.503	3500.73	1573.96	5709.55	5288.14	3094.47	4588.07	4405.03	3846.13
YEL035C	2	5	1	4	2	0	2	2								YEL035C	2.18914	2.94603	1.23031	4.34499	1.87389	0	2.18579	2.06271								YEL035C	501	0.501	4.36954	5.8803	2.45572	8.67264	3.74029	0	4.36286	4.11718
YEL034C-A	27	14	11	9	11	19	14	29								YEL034C-A	29.5534	8.24888	13.5335	9.77623	10.3064	26.9925	15.3005	29.9092								YEL034C-A	603	0.603	49.0106	13.6797	22.4436	16.2127	17.0918	44.7636	25.374	49.6007
YEL034W	133931	204134	128373	127000	134468	116342	143876	134278								YEL034W	146597	120277	157939	137954	125989	165282	157242	138488								YEL034W	474	0.474	309276	253749	333205	291041	265799	348696	331733	292169
YEL033W	518	660	479	386	453	440	488	490								YEL033W	566.988	388.876	589.321	419.292	424.435	625.089	533.333	505.363								YEL033W	420	0.42	1349.97	925.895	1403.14	998.314	1010.56	1488.31	1269.84	1203.25
YEL032W	6819	7071	10230	10862	6892	6816	9575	8926								YEL032W	7463.88	4166.27	12586.1	11798.8	6457.42	9683.19	10464.5	9205.86								YEL032W	2916	2.916	2559.63	1428.76	4316.23	4046.24	2214.48	3320.71	3588.64	3157.02
YEL032C-A	0	1	0	0	0	0	0	0								YEL032C-A	0	0.589206	0	0	0	0	0	0								YEL032C-A	162	0.162	0	3.63707	0	0	0	0	0	0
YEL031W	29667	31769	33186	34310	31086	30274	42199	38321								YEL031W	32472.6	18718.5	40829.2	37269.2	29125.8	43009	46119.1	39522.5								YEL031W	3648	3.648	8901.49	5131.16	11192.2	10216.3	7984.05	11789.7	12642.3	10834
YEL030C-A	6	6	1	2	3	6	3	2								YEL030C-A	6.56743	3.53523	1.23031	2.1725	2.81083	8.52394	3.27869	2.06271								YEL030C-A	315	0.315	20.849	11.223	3.90576	6.89681	8.92327	27.0601	10.4085	6.54827
YEL030W	444	431	460	446	405	409	552	479								YEL030W	485.989	253.948	565.945	484.467	379.462	581.048	603.279	494.018								YEL030W	1935	1.935	251.157	131.239	292.478	250.37	196.104	300.283	311.772	255.307
YEL029C	866	1684	1196	1209	1063	909	1144	1168								YEL029C	947.898	992.222	1471.46	1313.27	995.971	1291.38	1250.27	1204.62								YEL029C	939	0.939	1009.48	1056.68	1567.05	1398.59	1060.67	1375.27	1331.49	1282.88
YEL028W	95	163	129	130	114	94	136	108								YEL028W	103.984	96.0405	158.711	141.212	106.812	133.542	148.634	111.386								YEL028W	462	0.462	225.074	207.88	343.53	305.654	231.194	289.051	321.718	241.096
YEL027W	12658	23425	14175	14552	14552	12074	15299	14579								YEL027W	13855.1	13802.1	17439.7	15807.1	13634.4	17153	16720.2	15036.1								YEL027W	483	0.483	28685.5	28575.9	36107.1	32726.9	28228.6	35513.5	34617.4	31130.6
YEL026W	17615	32075	15085	15575	17318	16969	20382	19944								YEL026W	19280.9	18898.8	18559.3	16918.3	16226	24107.1	22275.4	20569.3								YEL026W	381	0.381	50605.9	49603.1	48712.1	44405	42587.9	63273.3	58465.6	53987.7
YEL025C	2033	1266	2550	2821	2077	2026	2909	2487								YEL025C	2225.26	745.934	3137.3	3064.31	1946.03	2878.25	3179.23	2564.98								YEL025C	3567	3.567	623.847	209.121	879.536	859.071	545.565	806.91	891.291	719.085
YEL024W	6177	10459	11091	11191	5095	4371	7495	5989								YEL024W	6761.16	6162.5	13645.4	12156.2	4773.73	6209.69	8191.26	6176.77								YEL024W	648	0.648	10433.9	9510.04	21057.8	18759.6	7366.86	9582.85	12640.8	9532.06
YEL023C	189	108	238	291	145	153	239	197								YEL023C	206.874	63.6342	292.815	316.098	135.857	217.36	261.202	203.177								YEL023C	2049	2.049	100.963	31.0562	142.906	154.269	66.304	106.081	127.478	99.1589
YEL022W	5731	6859	10026	11650	7435	7073	10995	9213								YEL022W	6272.99	4041.36	12335.1	12654.8	6966.18	10048.3	12016.4	9501.86								YEL022W	4380	4.38	1432.19	922.685	2816.24	2889.22	1590.45	2294.13	2743.47	2169.37
YEL021W	1392	1243	1889	1912	1683	1578	1769	1556								YEL021W	1523.64	732.383	2324.06	2076.91	1576.88	2241.8	1933.33	1604.79								YEL021W	804	0.804	1895.08	910.924	2890.63	2583.22	1961.29	2788.3	2404.64	1996
YEL020C-B	1	8	7	2	7	5	0	8								YEL020C-B	1.09457	4.71365	8.6122	2.1725	6.55861	7.10328	0	8.25083								YEL020C-B	198	0.198	5.52814	23.8063	43.496	10.9722	33.1243	35.8752	0	41.6708
YEL020W-A	2387	3838	3601	3776	2450	2120	2746	2315								YEL020W-A	2612.74	2261.37	4430.36	4101.67	2295.51	3011.79	3001.09	2387.58								YEL020W-A	264	0.264	9896.75	8565.8	16781.7	15536.6	8695.12	11408.3	11367.8	9043.87
YEL020C	724	639	992	947	709	665	942	841								YEL020C	792.469	376.502	1220.47	1028.68	664.293	944.736	1029.51	867.368								YEL020C	1683	1.683	470.867	223.709	725.177	611.216	394.708	561.341	611.71	515.37
YEL019C	401	295	405	433	369	383	466	423								YEL019C	438.923	173.816	498.278	470.345	345.732	544.111	509.29	436.262								YEL019C	804	0.804	545.924	216.189	619.748	585.007	430.015	676.755	633.445	542.615
YEL018C-A	24	1	7	3	4	7	7	0								YEL018C-A	26.2697	0.589206	8.6122	3.25874	3.74777	9.94459	7.65027	0								YEL018C-A	534	0.534	49.1942	1.10338	16.1277	6.10252	7.0183	18.6228	14.3264	0
YEL018W	539	617	676	731	495	493	679	613								YEL018W	589.974	363.54	831.693	794.047	463.787	700.384	742.077	632.219								YEL018W	840	0.84	702.35	432.786	990.111	945.294	552.128	833.79	883.424	752.642
YEL017C-A	4748	10597	3514	3798	4752	4002	5307	5346								YEL017C-A	5197.02	6243.81	4323.33	4125.57	4452.36	5685.47	5800	5513.61								YEL017C-A	132	0.132	39371.4	47301.6	32752.5	31254.3	33730	43071.7	43939.4	41769.8
YEL017W	3585	4388	4755	4706	3207	2987	4044	3966								YEL017W	3924.04	2585.43	5850.15	5111.88	3004.78	4243.5	4419.67	4090.35								YEL017W	1014	1.014	3869.86	2549.74	5769.38	5041.31	2963.29	4184.91	4358.65	4033.87
YEL016C	1391	1111	1376	1376	922	876	1292	1093								YEL016C	1522.55	654.608	1692.91	1494.68	863.862	1244.49	1412.02	1127.27								YEL016C	1482	1.482	1027.36	441.706	1142.32	1008.55	582.903	839.74	952.781	760.64
YEL015W	8	7	13	10	3805	3671	4908	4298								YEL015W	8.75657	4.12444	15.9941	10.8625	3565.07	5215.23	5363.93	4432.76								YEL015W	1656	1.656	5.28778	2.4906	9.65827	6.55947	2152.82	3149.29	3239.09	2676.78
YEL014C	0	0	0	0	0	0	0	0								YEL014C	0	0	0	0	0	0	0	0								YEL014C	306	0.306	0	0	0	0	0	0	0	0
YEL013W	6097	6168	9135	9868	6838	6110	8518	7609								YEL013W	6673.6	3634.22	11238.9	10719.1	6406.82	8680.21	9309.29	7847.57								YEL013W	1737	1.737	3842.03	2092.24	6470.31	6171.04	3688.44	4997.24	5359.41	4517.88
YEL012W	490	809	1000	1150	438	383	625	504								YEL012W	536.34	476.667	1230.31	1249.19	410.381	544.111	683.06	519.802								YEL012W	657	0.657	816.347	725.521	1872.63	1901.35	624.629	828.176	1039.67	791.175
YEL011W	990	795	9128	9269	692	549	1681	1380								YEL011W	1083.63	468.419	11230.3	10068.4	648.365	779.94	1837.16	1423.27								YEL011W	2115	2.115	512.352	221.475	5309.84	4760.49	306.556	368.766	868.633	672.94
YEL010W	0	0	0	0	0	0	0	0								YEL010W	0	0	0	0	0	0	0	0								YEL010W	351	0.351	0	0	0	0	0	0	0	0
YEL009C-A	3	7	12	5	2	4	8	5								YEL009C-A	3.28371	4.12444	14.7638	5.43124	1.87389	5.68263	8.74317	5.15677								YEL009C-A	408	0.408	8.04832	10.1089	36.1857	13.3119	4.59286	13.928	21.4293	12.6391
YEL009C	28367	47883	36184	34911	28425	28765	38844	36719								YEL009C	31049.7	28212.9	44517.7	37922	26632.6	40865.2	42452.5	37870.3								YEL009C	846	0.846	36701.8	33348.6	52621.4	44825.1	31480.6	48304	50180.2	44763.9
YEL008W	4	3	8	5	0	0	2	1								YEL008W	4.37828	1.76762	9.84252	5.43124	0	0	2.18579	1.03135								YEL008W	381	0.381	11.4916	4.63942	25.8334	14.2552	0	0	5.73699	2.70696
YEL008C-A	131	156	172	174	111	124	160	123								YEL008C-A	143.389	91.9161	211.614	189.007	104.001	176.161	174.863	126.856								YEL008C-A	93	0.093	1541.81	988.345	2275.42	2032.34	1118.29	1894.21	1880.25	1364.05
YEL007W	10152	6341	14807	15199	9350	8753	13641	12446								YEL007W	11112.1	3736.15	18217.3	16509.9	8760.42	12435	14908.2	12836.2								YEL007W	2001	2.001	5553.27	1867.14	9104.08	8250.82	4378.02	6214.4	7450.37	6414.9
YEL006W	1390	1882	1056	1074	1605	1443	1715	1568								YEL006W	1521.45	1108.89	1299.21	1166.63	1503.79	2050.01	1874.32	1617.16								YEL006W	1008	1.008	1509.38	1100.08	1288.9	1157.37	1491.86	2033.74	1859.44	1604.33
YEL005C	440	494	855	876	371	338	533	417								YEL005C	481.611	291.068	1051.92	951.553	347.606	480.182	582.514	430.074								YEL005C	849	0.849	567.269	342.836	1239.01	1120.79	409.43	565.585	686.117	506.566
YEL004W	499	998	733	755	576	535	721	645								YEL004W	546.191	588.027	901.821	820.117	539.68	760.051	787.978	665.223								YEL004W	1029	1.029	530.798	571.455	876.405	797.004	524.47	738.631	765.771	646.475
YEL003W	939	1832	1186	1104	974	867	1211	1037								YEL003W	1027.8	1079.42	1459.15	1199.22	912.583	1231.71	1323.5	1069.51								YEL003W	336	0.336	3058.93	3212.57	4342.72	3569.1	2716.02	3665.8	3938.98	3183.08
YEL002C	9711	14052	10602	10389	10467	9675	12762	11767								YEL002C	10629.4	8279.52	13043.8	11285	9806.99	13744.9	13947.5	12135.9								YEL002C	1293	1.293	8220.71	6403.34	10088	8727.79	7584.68	10630.2	10787	9385.87
YEL001C	3006	3622	3583	3522	2914	2793	3296	3224								YEL001C	3290.28	2134.1	4408.22	3825.77	2730.25	3967.89	3602.19	3325.08								YEL001C	678	0.678	4852.92	3147.64	6501.8	5642.72	4026.92	5852.35	5312.96	4904.25
YER001W	8053	10467	13223	13840	13368	11990	16083	14826								YER001W	8814.58	6167.22	16268.5	15033.7	12525.1	17033.7	17577	15290.8								YER001W	2289	2.289	3850.84	2694.28	7107.23	6567.79	5471.85	7441.53	7678.92	6680.14
YER002W	900	776	1507	1666	1063	1065	1225	1128								YER002W	985.114	457.224	1854.08	1809.69	995.971	1513	1338.8	1163.37								YER002W	696	0.696	1415.39	656.931	2663.91	2600.13	1430.99	2173.85	1923.56	1671.5
YER003C	12974	12563	15015	15104	12831	11538	15126	13803								YER003C	14201	7402.19	18473.2	16406.7	12021.9	16391.5	16531.1	14235.8								YER003C	1290	1.29	11008.5	5738.13	14320.3	12718.4	9319.32	12706.6	12814.8	11035.5
YER004W	3395	4399	4023	4106	2846	2822	3795	3549								YER004W	3716.07	2591.92	4949.56	4460.13	2666.54	4009.09	4147.54	3660.27								YER004W	696	0.696	5339.18	3724.02	7111.43	6408.24	3831.24	5760.19	5959.11	5259.01
YER005W	1890	1419	1930	1891	1862	1668	2092	1971								YER005W	2068.74	836.083	2374.51	2054.1	1744.59	2369.65	2286.34	2032.8								YER005W	1893	1.893	1092.84	441.671	1254.36	1085.1	921.6	1251.8	1207.79	1073.85
YER006W	8806	8326	10326	11283	10651	10359	11640	11247								YER006W	9638.79	4905.73	12704.2	12256.1	9979.39	14716.6	12721.3	11599.6								YER006W	1563	1.563	6166.85	3138.66	8128.11	7841.42	6384.76	9415.6	8139.03	7421.39
YER006C-A	7	10	5	7	4	8	8	5								YER006C-A	7.662	5.89206	6.15157	7.60374	3.74777	11.3653	8.74317	5.15677								YER006C-A	318	0.318	24.0943	18.5285	19.3446	23.9111	11.7855	35.7398	27.4942	16.2162
YER007W	200	366	233	258	214	219	265	267								YER007W	218.914	215.649	286.663	280.252	200.506	311.124	289.617	275.371								YER007W	1557	1.557	140.6	138.503	184.113	179.995	128.777	199.823	186.01	176.86
YER007C-A	1733	3085	1942	1969	1970	1798	2180	2018								YER007C-A	1896.89	1817.7	2389.27	2138.82	1845.78	2554.34	2382.51	2081.27								YER007C-A	546	0.546	3474.16	3329.12	4375.96	3917.26	3380.55	4678.28	4363.58	3811.85
YER008C	2741	3299	5645	6328	3542	3518	5511	5005								YER008C	3000.22	1943.79	6945.13	6873.78	3318.65	4997.87	6022.95	5161.92								YER008C	4011	4.011	747.998	484.615	1731.52	1713.73	827.388	1246.04	1501.61	1286.94
YER009W	9610	17439	10661	10095	9812	8467	11086	11009								YER009W	10518.8	10275.2	13116.4	10965.7	9193.29	12028.7	12115.8	11354.2								YER009W	378	0.378	27827.6	27183	34699.4	29009.7	24320.9	31822	32052.5	30037.5
YER010C	2224	4572	3181	3155	2166	1954	2709	2538								YER010C	2434.33	2693.85	3913.63	3427.11	2029.42	2775.96	2960.66	2617.57								YER010C	705	0.705	3452.94	3821.06	5551.25	4861.15	2878.61	3937.54	4199.51	3712.87
YER011W	448	532	453	600	777	737	764	838								YER011W	490.368	313.457	557.333	651.749	728.005	1047.02	834.973	864.274								YER011W	765	0.765	641.004	409.748	728.539	851.959	951.641	1368.66	1091.47	1129.77
YER012W	3570	6308	5452	5816	3642	3206	4510	3861								YER012W	3907.62	3716.71	6707.68	6317.62	3412.35	4554.62	4928.96	3982.05								YER012W	597	0.597	6545.42	6225.64	11235.6	10582.3	5715.83	7629.19	8256.22	6670.11
YER013W	1321	1068	2603	3003	1563	1409	2243	2000								YER013W	1445.93	629.272	3202.51	3262	1464.44	2001.7	2451.37	2062.71								YER013W	3438	3.438	420.572	183.034	931.504	948.808	425.958	582.229	713.021	599.973
YER014W	1288	1166	1857	2085	1480	1359	1828	1634								YER014W	1409.81	687.014	2284.69	2264.83	1386.68	1930.67	1997.81	1685.23								YER014W	1620	1.62	870.251	424.083	1410.31	1398.04	855.973	1191.77	1233.22	1040.27
YER014C-A	11	2	2	6	9	4	6	13								YER014C-A	12.0403	1.17841	2.46063	6.51749	8.43249	5.68263	6.55738	13.4076								YER014C-A	462	0.462	26.0612	2.55067	5.32604	14.1071	18.2521	12.3001	14.1935	29.0208
YER015W	558	610	758	834	470	460	665	577								YER015W	610.771	359.416	932.579	905.931	440.364	653.502	726.776	595.091								YER015W	2235	2.235	273.275	160.812	417.261	405.338	197.031	292.395	325.179	266.26
YER016W	878	638	1579	1849	958	811	1402	1199								YER016W	961.033	375.913	1942.67	2008.47	897.592	1152.15	1532.24	1236.59								YER016W	1035	1.035	928.535	363.201	1876.97	1940.55	867.239	1113.19	1480.43	1194.78
YER017C	5066	5172	8128	7599	5502	5394	7313	6429								YER017C	5545.1	3047.37	10000	8254.4	5155.06	7663.02	7992.35	6630.57								YER017C	2286	2.286	2425.68	1333.06	4374.45	3610.85	2255.06	3352.15	3496.22	2900.51
YER018C	839	1830	1688	1717	860	737	1115	826								YER018C	918.345	1078.25	2076.77	1865.09	805.772	1047.02	1218.58	851.898								YER018C	666	0.666	1378.9	1618.99	3118.28	2800.43	1209.87	1572.11	1829.7	1279.13
YER019W	3016	4530	3643	3635	2997	2756	3632	3289								YER019W	3301.23	2669.1	4482.04	3948.51	2808.02	3915.33	3969.4	3392.12								YER019W	1434	1.434	2302.11	1861.3	3125.55	2753.5	1958.17	2730.35	2768.06	2365.5
YER019C-A	4734	9223	4426	4149	4963	4819	5429	5075								YER019C-A	5181.7	5434.24	5445.37	4506.84	4650.05	6846.14	5933.33	5234.12								YER019C-A	267	0.267	19407.1	20353	20394.7	16879.6	17415.9	25641	22222.2	19603.4
YER020W	1978	1746	2729	2763	1785	1553	2400	2115								YER020W	2165.06	1028.75	3357.53	3001.3	1672.44	2206.28	2622.95	2181.31								YER020W	1350	1.35	1603.75	762.039	2487.06	2223.19	1238.85	1634.28	1942.93	1615.79
YER021W	9304	11571	14202	15011	8963	7986	12111	10615								YER021W	10183.9	6817.7	17472.9	16305.7	8397.83	11345.4	13236.1	10947.8								YER021W	1572	1.572	6478.3	4336.96	11115.1	10372.6	5342.13	7217.15	8419.89	6964.26
YER022W	1409	2223	2731	2979	1579	1520	2512	2228								YER022W	1542.25	1309.8	3359.99	3235.93	1479.43	2159.4	2745.36	2297.85								YER022W	2064	2.064	747.214	634.595	1627.9	1567.8	716.78	1046.22	1330.11	1113.3
YER023W	7849	9632	7333	7184	7821	7330	8917	8548								YER023W	8591.29	5675.23	9021.9	7803.61	7327.84	10413.4	9745.36	8816.01								YER023W	861	0.861	9978.27	6591.44	10478.4	9063.42	8510.84	12094.6	11318.6	10239.3
YER023C-A	0	0	0	2	0	0	1	0								YER023C-A	0	0	0	2.1725	0	0	1.0929	0								YER023C-A	213	0.213	0	0	0	10.1995	0	0	5.13097	0
YER024W	504	332	1131	1166	578	563	707	641								YER024W	551.664	195.616	1391.49	1266.57	541.553	799.83	772.678	661.097								YER024W	2772	2.772	199.013	70.5687	501.979	456.914	195.366	288.539	278.744	238.491
YER025W	19555	18959	21584	23243	24084	22105	28739	26281								YER025W	21404.3	11170.8	26555.1	25247.7	22565.4	31403.6	31408.7	27105								YER025W	1584	1.584	13512.8	7052.24	16764.6	15939.2	14245.8	19825.5	19828.8	17111.7
YER026C	3109	5501	6689	6747	3184	2825	3880	3765								YER026C	3403.02	3241.22	8229.58	7328.92	2983.23	4013.35	4240.44	3883.04								YER026C	831	0.831	4095.09	3900.39	9903.22	8819.39	3589.93	4829.55	5102.81	4672.74
YER027C	4931	3845	5812	5938	4548	4325	5833	5337								YER027C	5397.33	2265.5	7150.59	6450.14	4261.22	6144.34	6374.86	5504.33								YER027C	1254	1.254	4304.09	1806.62	5702.23	5143.65	3398.1	4899.79	5083.62	4389.42
YER028C	707	593	282	277	720	687	666	573								YER028C	773.862	349.399	346.949	300.891	674.599	975.991	727.869	590.965								YER028C	1185	1.185	653.048	294.851	292.784	253.916	569.282	823.621	614.235	498.705
YER029C	712	1037	1271	1260	713	651	862	787								YER029C	779.335	611.006	1563.73	1368.67	668.041	924.847	942.077	811.675								YER029C	591	0.591	1318.67	1033.85	2645.91	2315.86	1130.36	1564.89	1594.04	1373.39
YER030W	482	854	855	954	856	453	853	735								YER030W	527.583	503.182	1051.92	1036.28	802.024	643.557	932.24	758.045								YER030W	462	0.462	1141.95	1089.14	2276.88	2243.03	1735.98	1392.98	2017.84	1640.79
YER031C	3702	3570	4611	4386	3867	3474	4467	4157								YER031C	4052.1	2103.46	5672.98	4764.28	3623.16	4935.36	4881.97	4287.33								YER031C	672	0.672	6029.91	3130.16	8441.94	7089.71	5391.61	7344.29	7264.83	6379.96
YER032W	4214	2681	6479	7161	3867	4169	5902	5051								YER032W	4612.52	1579.66	7971.21	7778.62	3623.16	5922.72	6450.27	5209.36								YER032W	2631	2.631	1753.14	600.403	3029.73	2956.53	1377.1	2251.13	2451.64	1979.99
YER033C	1832	853	3333	3566	1601	1572	2524	2002								YER033C	2005.25	502.593	4100.64	3873.56	1500.05	2233.27	2758.47	2064.77								YER033C	3231	3.231	620.63	155.553	1269.15	1198.87	464.267	691.201	853.751	639.05
YER034W	888	864	1147	1303	869	767	951	833								YER034W	971.979	509.074	1411.17	1415.38	814.204	1089.64	1039.34	859.117								YER034W	558	0.558	1741.9	912.319	2528.98	2536.53	1459.15	1952.77	1862.62	1539.64
YER035W	1482	1578	4136	4307	1120	955	1778	1467								YER035W	1622.15	929.767	5088.58	4678.47	1049.38	1356.73	1943.17	1513								YER035W	438	0.438	3703.55	2122.75	11617.8	10681.4	2395.84	3097.55	4436.46	3454.33
YER036C	21361	17957	18494	18959	24787	23352	27920	26641								YER036C	23381.1	10580.4	22753.4	20594.2	23224	33175.2	30513.7	27476.3								YER036C	1833	1.833	12755.7	5772.16	12413.2	11235.2	12670	18098.8	16646.8	14989.8
YER037W	1450	2784	3184	3142	1994	1493	2330	2197								YER037W	1587.13	1640.35	3917.32	3412.99	1868.27	2121.04	2546.45	2265.88								YER037W	966	0.966	1642.99	1698.08	4055.2	3533.12	1934.02	2195.69	2636.07	2345.63
YER038C	418	590	276	334	415	377	496	419								YER038C	457.531	347.631	339.567	362.807	388.832	535.587	542.077	432.137								YER038C	1395	1.395	327.979	249.198	243.417	260.077	278.732	383.934	388.585	309.776
YER038W-A	38	42	26	33	23	29	54	47								YER038W-A	41.5937	24.7466	31.9882	35.8462	21.5497	41.199	59.0164	48.4736								YER038W-A	381	0.381	109.17	64.9518	83.9585	94.0845	56.5609	108.134	154.899	127.227
YER039C	102	108	151	144	77	72	112	102								YER039C	111.646	63.6342	185.778	156.42	72.1447	102.287	122.404	105.198								YER039C	750	0.75	148.862	84.8456	247.703	208.56	96.1929	136.383	163.206	140.264
YER039C-A	20	21	20	38	10	10	26	9								YER039C-A	21.8914	12.3733	24.6063	41.2774	9.36944	14.2066	28.4153	9.28218								YER039C-A	219	0.219	99.9608	56.4992	112.358	188.481	42.7828	64.8702	129.75	42.3844
YER040W	2638	1829	4671	5145	2549	2601	3993	3537								YER040W	2887.48	1077.66	5746.8	5588.75	2388.27	3695.13	4363.93	3647.9								YER040W	2193	2.193	1316.68	491.408	2620.52	2548.45	1089.04	1684.96	1989.94	1663.43
YER041W	873	532	857	879	789	757	1126	1066								YER041W	955.56	313.457	1054.38	954.812	739.249	1075.44	1230.6	1099.42								YER041W	2280	2.28	419.105	137.481	462.447	418.777	324.232	471.683	539.737	482.203
YER042W	1722	2936	2264	2393	2252	1811	2258	2097								YER042W	1884.85	1729.91	2785.43	2599.39	2110	2572.81	2467.76	2162.75								YER042W	555	0.555	3396.13	3116.95	5018.8	4683.59	3801.8	4635.69	4446.41	3896.84
YER043C	70027	90552	70959	73969	78018	70873	86668	84357								YER043C	76649.5	53353.8	87301.9	80348.7	73098.5	100686	94719.1	87001.9								YER043C	1350	1.35	56777.4	39521.3	64668.1	59517.5	54147	74582.4	70162.3	64445.8
YER044C	5999	13053	7283	6916	7418	6353	7882	7533								YER044C	6566.33	7690.9	8960.38	7512.49	6950.25	9025.43	8614.21	7769.18								YER044C	447	0.447	14689.8	17205.6	20045.6	16806.5	15548.7	20191.1	19271.2	17380.7
YER044C-A	56	74	163	131	73	77	110	89								YER044C-A	61.296	43.6012	200.541	142.299	68.3969	109.391	120.219	91.7904								YER044C-A	1227	1.227	49.956	35.5348	163.44	115.973	55.7432	89.1528	97.9777	74.8088
YER045C	1112	759	4001	4410	1425	1274	1874	1753								YER045C	1217.16	447.207	4922.49	4790.35	1335.14	1809.92	2048.09	1807.96								YER045C	1470	1.47	828.002	304.223	3348.63	3258.74	908.262	1231.24	1393.26	1229.91
YER046W	294	469	529	553	257	240	329	299								YER046W	321.804	276.337	650.837	600.695	240.795	340.958	359.563	308.375								YER046W	432	0.432	744.916	639.67	1506.57	1390.5	557.395	789.254	832.321	713.83
YER046W-A	9	13	24	15	13	5	12	15								YER046W-A	9.85114	7.65967	29.5276	16.2937	12.1803	7.10328	13.1148	15.4703								YER046W-A	330	0.33	29.8519	23.2111	89.4775	49.3749	36.9099	21.5251	39.7417	46.8797
YER047C	1805	1038	4003	4139	1638	1796	2725	2240								YER047C	1975.7	611.596	4924.95	4495.98	1534.71	2551.5	2978.14	2310.23								YER047C	2694	2.694	733.371	227.021	1828.12	1668.89	569.678	947.104	1105.47	857.547
YER048C	2201	3451	3386	3398	2410	2226	3046	2905								YER048C	2409.15	2033.35	4165.85	3691.07	2258.03	3162.38	3328.96	2996.08								YER048C	1176	1.176	2048.6	1729.04	3542.39	3138.67	1920.1	2689.1	2830.75	2547.69
YER048W-A	569	1083	920	910	592	443	690	605								YER048W-A	622.811	638.11	1131.89	988.486	554.671	629.351	754.098	623.969								YER048W-A	285	0.285	2185.3	2238.98	3971.54	3468.37	1946.21	2208.25	2645.96	2189.36
YER049W	8065	9698	7177	7490	9929	9103	10957	10611								YER049W	8827.71	5714.12	8829.97	8136	9302.91	12932.2	11974.9	10943.7								YER049W	1935	1.935	4562.13	2953.03	4563.29	4204.65	4807.71	6683.33	6188.56	5655.65
YER050C	1559	3094	3549	3774	1602	1528	2270	1948								YER050C	1706.44	1823	4366.39	4099.5	1500.98	2170.76	2480.87	2009.08								YER050C	417	0.417	4092.17	4371.71	10471	9830.94	3599.48	5205.67	5949.34	4817.93
YER051W	757	1579	893	944	753	698	958	866								YER051W	828.59	930.356	1098.67	1025.42	705.519	991.618	1046.99	893.152								YER051W	1479	1.479	560.237	629.044	742.847	693.319	477.024	670.465	707.907	603.889
YER052C	13721	14539	14697	15662	18481	16403	22353	20586								YER052C	15018.6	8566.46	18081.9	17012.8	17315.7	23303	24429.5	21231.4								YER052C	1584	1.584	9481.44	5408.12	11415.4	10740.4	10931.6	14711.5	15422.7	13403.7
YER053C	848	751	4614	4146	689	489	1063	865								YER053C	928.196	442.494	5676.67	4503.58	645.554	694.701	1161.75	892.12								YER053C	903	0.903	1027.9	490.026	6286.46	4987.36	714.899	769.326	1286.54	987.952
YER053C-A	842	1602	4286	3795	543	443	906	832								YER053C-A	921.629	943.908	5273.13	4122.31	508.76	629.351	990.164	858.086								YER053C-A	114	0.114	8084.46	8279.89	46255.5	36160.6	4462.81	5520.62	8685.65	7527.07
YER055C	11868	20008	17219	17315	15775	13617	17996	17978								YER055C	12990.4	11788.8	21184.8	18808.4	14780.3	19345.1	19667.8	18541.7								YER055C	894	0.894	14530.6	13186.6	23696.6	21038.5	16532.8	21638.8	21999.7	20740.1
YER056C	10958	12891	13705	14122	12696	12182	13960	13178								YER056C	11994.3	7595.45	16861.5	15340	11895.4	17306.4	15256.8	13591.2								YER056C	1602	1.602	7487.08	4741.23	10525.3	9575.53	7425.37	10803	9523.61	8483.88
YER056C-A	48519	92907	50913	51995	46143	40977	56364	53370								YER056C-A	53107.5	54741.3	62639	56479.5	43233.4	58214.2	61600	55043.3								YER056C-A	366	0.366	145102	149566	171145	154315	118124	159055	168306	150392
YER057C	2339	3773	3056	2782	2492	2226	2679	2649								YER057C	2560.2	2223.07	3759.84	3021.94	2334.86	3162.38	2927.87	2732.05								YER057C	390	0.39	6564.62	5700.19	9640.62	7748.57	5986.83	8108.67	7507.36	7005.27
YER058W	152	205	264	273	132	124	163	167								YER058W	166.375	120.787	324.803	296.546	123.677	176.161	178.142	172.236								YER058W	324	0.324	513.502	372.8	1002.48	915.265	381.718	543.708	549.821	531.593
YER059W	1200	1057	2485	2531	1240	1152	1842	1657								YER059W	1313.49	622.79	3057.33	2749.29	1161.81	1636.6	2013.11	1708.95								YER059W	1263	1.263	1039.97	493.104	2420.69	2176.8	919.881	1295.8	1593.92	1353.09
YER060W	1775	1962	1038	991	1868	1933	1929	1818								YER060W	1942.86	1156.02	1277.07	1076.47	1750.21	2746.13	2108.2	1875								YER060W	1587	1.587	1224.24	728.432	804.705	678.306	1102.84	1730.39	1328.42	1181.47
YER060W-A	492	575	623	533	559	591	688	633								YER060W-A	538.529	338.793	766.486	578.97	523.752	839.608	751.913	652.847								YER060W-A	1593	1.593	338.06	212.676	481.159	363.446	328.783	527.061	472.01	409.822
YER061C	975	1047	1731	1733	1085	1014	1420	1157								YER061C	1067.21	616.898	2129.68	1882.47	1016.58	1440.55	1551.91	1193.28								YER061C	1329	1.329	803.015	464.182	1602.46	1416.45	764.924	1083.93	1167.73	897.875
YER062C	3057	3417	8730	8789	2037	1731	2863	2533								YER062C	3346.1	2013.32	10740.6	9547.03	1908.55	2459.16	3128.96	2612.42								YER062C	753	0.753	4443.7	2673.73	14263.8	12678.7	2534.6	3265.81	4155.33	3469.35
YER063W	1378	1263	2106	2056	1196	1131	1491	1487								YER063W	1508.32	744.167	2591.04	2233.33	1120.58	1606.76	1629.51	1533.62								YER063W	657	0.657	2295.77	1132.67	3943.75	3399.28	1705.61	2445.6	2480.23	2334.28
YER064C	5119	3841	10867	12051	4895	5017	6750	6080								YER064C	5603.11	2263.14	13369.8	13090.4	4586.34	7127.43	7377.05	6270.63								YER064C	1518	1.518	3691.11	1490.87	8807.53	8623.44	3021.3	4695.28	4859.72	4130.85
YER065C	565	362	654	670	560	535	736	639								YER065C	618.433	213.292	804.626	727.786	524.688	760.051	804.372	659.035								YER065C	1674	1.674	369.434	127.415	480.661	434.759	313.434	454.033	480.509	393.689
YER066W	70	59	125	67	55	84	76	47								YER066W	76.62	34.7631	153.789	72.7786	51.5319	119.335	83.0601	48.4736								YER066W	558	0.558	137.312	62.2995	275.608	130.428	92.3511	213.862	148.853	86.8702
YER066C-A	5	11	6	4	9	9	9	6								YER066C-A	5.47285	6.48126	7.38189	4.34499	8.43249	12.7859	9.83607	6.18812								YER066C-A	501	0.501	10.9239	12.9367	14.7343	8.67264	16.8313	25.5208	19.6329	12.3515
YER067W	870	1169	10237	9403	770	510	1501	1375								YER067W	952.277	688.782	12594.7	10214	721.447	724.535	1640.44	1418.11								YER067W	486	0.486	1959.42	1417.25	25915.1	21016.4	1484.46	1490.81	3375.39	2917.92
YER067C-A	3	6	1	2	3	6	2	3								YER067C-A	3.28371	3.53523	1.23031	2.1725	2.81083	8.52394	2.18579	3.09406								YER067C-A	324	0.324	10.1349	10.9112	3.79727	6.70524	8.6754	26.3085	6.74627	9.54957
YER068W	4281	3354	7469	7873	4407	4327	6238	5520								YER068W	4685.86	1976.2	9189.22	8552.03	4129.11	6147.18	6817.49	5693.07								YER068W	1764	1.764	2656.38	1120.29	5209.31	4848.09	2340.77	3484.8	3864.79	3227.36
YER068C-A	1	1	13	4	3	4	1	1								YER068C-A	1.09457	0.589206	15.9941	4.34499	2.81083	5.68263	1.0929	1.03135								YER068C-A	432	0.432	2.53373	1.3639	37.0234	10.0579	6.50655	13.1542	2.52985	2.38739
YER069W	5276	4752	5646	5439	9399	7751	7624	7046								YER069W	5774.96	2799.91	6946.36	5908.1	8806.33	11011.5	8332.24	7266.91								YER069W	2592	2.592	2227.99	1080.21	2679.92	2279.36	3397.51	4248.27	3214.6	2803.59
YER070W	27102	29490	44042	45789	27436	26711	36417	33559								YER070W	29665.1	17375.7	54185.5	49738.2	25706	37947.2	39800	34611.2								YER070W	2667	2.667	11123	6515.06	20317	18649.5	9638.54	14228.4	14923.1	12977.6
YER071C	413	672	669	651	385	343	375	367								YER071C	452.058	395.946	823.081	707.148	360.723	487.285	409.836	378.507								YER071C	381	0.381	1186.5	1039.23	2160.32	1856.03	946.78	1278.96	1075.69	993.456
YER072W	14058	18308	19912	19143	14832	12836	16572	16086								YER072W	15387.5	10787.2	24498	20794	13896.7	18235.5	18111.5	16590.3								YER072W	390	0.39	39455.1	27659.4	62815.5	53318.1	35632.7	46757.8	46439.7	42539.4
YER073W	7157	6818	16284	17210	9194	8509	12212	11280								YER073W	7833.84	4017.2	20034.4	18694.3	8614.26	12088.4	13346.4	11633.7								YER073W	1563	1.563	5012.06	2570.19	12817.9	11960.5	5511.36	7734.08	8538.99	7443.16
YER074W	18732	34414	15559	14699	18720	16089	19458	18295								YER074W	20503.5	20276.9	19142.5	15966.8	17539.6	22856.9	21265.6	18868.6								YER074W	408	0.408	50253.7	49698.3	46917.8	39134.2	42989.2	56021.9	52121.5	46246.6
YER074W-A	2006	3864	2651	2762	1914	1593	2389	2073								YER074W-A	2195.71	2276.69	3261.56	3000.22	1793.31	2263.11	2610.93	2138								YER074W-A	258	0.258	8510.5	8824.38	12641.7	11628.7	6950.81	8771.73	10119.9	8286.8
YER075C	3336	2753	4664	5004	3004	2923	4570	3904								YER075C	3651.49	1622.08	5738.19	5435.59	2814.58	4152.58	4994.54	4026.4								YER075C	2787	2.787	1310.19	582.018	2058.91	1950.34	1009.9	1489.98	1792.08	1444.71
YER076C	393	249	474	475	358	386	468	399								YER076C	430.166	146.712	583.169	515.968	335.426	548.373	511.475	411.51								YER076C	909	0.909	473.23	161.4	641.55	567.621	369.005	603.271	562.679	452.706
YER076W-A	22	18	13	16	21	22	30	22								YER076W-A	24.0806	10.6057	15.9941	17.38	19.6758	31.2544	32.7869	22.6898								YER076W-A	348	0.348	69.197	30.4762	45.96	49.9424	56.5397	89.8116	94.2152	65.2005
YER077C	1104	1628	4921	5281	1201	1187	1877	1670								YER077C	1208.41	959.227	6054.38	5736.48	1125.27	1686.32	2051.37	1722.36								YER077C	2067	2.067	584.618	464.067	2929.07	2775.27	544.397	815.829	992.436	833.265
YER078C	1873	1593	1995	2051	2070	1916	2591	2217								YER078C	2050.13	938.605	2454.48	2227.89	1939.47	2721.98	2831.69	2286.51								YER078C	1536	1.536	1334.72	611.071	1597.97	1450.45	1262.68	1772.12	1843.55	1488.61
YER078W-A	22	25	30	28	16	11	12	21								YER078W-A	24.0806	14.7301	36.9094	30.4149	14.9911	15.6272	13.1148	21.6584								YER078W-A	165	0.165	145.943	89.2736	223.694	184.333	90.8551	94.7104	79.4834	131.263
YER079W	544	610	1864	1891	437	404	756	576								YER079W	595.447	359.416	2293.31	2054.1	409.444	573.945	826.23	594.059								YER079W	633	0.633	940.674	567.797	3622.92	3245.02	646.832	906.706	1305.26	938.482
YER079C-A	0	0	1	0	0	1	0	0								YER079C-A	0	0	1.23031	0	0	1.42066	0	0								YER079C-A	339	0.339	0	0	3.62925	0	0	4.19073	0	0
YER080W	5416	5710	7404	7707	5981	5786	8140	7438								YER080W	5928.2	3364.36	9109.25	8371.71	5603.86	8219.92	8896.17	7671.2								YER080W	1884	1.884	3146.6	1785.76	4835.06	4443.58	2974.45	4363.01	4721.96	4071.76
YER081W	1879	1587	6789	7357	3444	3142	4867	4352								YER081W	2056.7	935.07	8352.61	7991.53	3226.83	4463.7	5319.13	4488.45								YER081W	1410	1.41	1458.65	663.17	5923.84	5667.75	2288.53	3165.75	3772.43	3183.3
YER082C	3324	3769	5498	6014	4026	4115	5307	4842								YER082C	3638.35	2220.72	6764.27	6532.7	3772.14	5846	5800	4993.81								YER082C	1665	1.665	2185.2	1333.76	4062.63	3923.54	2265.55	3511.11	3483.48	2999.29
YER083C	4233	4778	6112	6264	4197	3973	5443	5118								YER083C	4633.32	2815.23	7519.69	6804.26	3932.35	5644.27	5948.63	5278.47								YER083C	858	0.858	5400.14	3281.15	8764.2	7930.37	4583.16	6578.4	6933.14	6152.06
YER084W	54	109	252	256	65	87	99	81								YER084W	59.1068	64.2234	310.039	278.08	60.9013	123.597	108.197	83.5396								YER084W	387	0.387	152.731	165.952	801.135	718.552	157.368	319.372	279.578	215.865
YER084W-A	9	0	2	3	2	0	0	0								YER084W-A	9.85114	0	2.46063	3.25874	1.87389	0	0	0								YER084W-A	513	0.513	19.203	0	4.79655	6.35233	3.6528	0	0	0
YER085C	4	4	14	7	3	11	4	7								YER085C	4.37828	2.35682	17.2244	7.60374	2.81083	15.6272	4.37158	7.21947								YER085C	522	0.522	8.38752	4.51499	32.997	14.5665	5.38473	29.9372	8.37468	13.8304
YER086W	19790	21826	17755	18154	24968	23833	30127	27913								YER086W	21661.6	12860	21844.2	19719.7	23393.6	33858.5	32925.7	28788.2								YER086W	1731	1.731	12513.9	7429.23	12619.4	11392.1	13514.5	19560.1	19021.2	16630.9
YER087W	780	817	1274	1322	783	770	1202	1057								YER087W	853.765	481.381	1567.42	1436.02	733.627	1093.91	1313.66	1090.14								YER087W	1731	1.731	493.221	278.094	905.5	829.59	423.817	631.95	758.903	629.775
YER087C-A	43	56	29	35	36	39	32	34								YER087C-A	47.0665	32.9955	35.6791	38.0187	33.73	55.4056	34.9727	35.066								YER087C-A	552	0.552	85.2655	59.7745	64.6361	68.8744	61.105	100.372	63.3563	63.5254
YER087C-B	5417	10318	5621	5412	5251	4952	6237	5879								YER087C-B	5929.29	6079.42	6915.6	5878.77	4919.89	7035.09	6816.39	6063.33								YER087C-B	249	0.249	23812.4	24415.4	27773.5	23609.5	19758.6	28253.4	27375.1	24350.7
YER088C	7452	5902	13621	14655	6463	6455	9868	8894								YER088C	8156.74	3477.49	16758.1	15919	6055.47	9170.34	10784.7	9172.85								YER088C	2013	2.013	4052.03	1727.52	8324.95	7908.08	3008.18	4555.56	5357.53	4556.81
YER088C-A	486	451	817	894	416	549	713	562								YER088C-A	531.961	265.732	1005.17	971.106	389.769	779.94	779.235	579.62								YER088C-A	324	0.324	1641.86	820.16	3102.37	2997.24	1202.99	2407.22	2405.05	1788.95
YER088W-B	0	3	6	2	4	3	2	1								YER088W-B	0	1.76762	7.38189	2.1725	3.74777	4.26197	2.18579	1.03135								YER088W-B	147	0.147	0	12.0246	50.2169	14.7789	25.4951	28.993	14.8693	7.01601
YER089C	9711	10362	11123	11951	9497	9809	12991	11918								YER089C	10629.4	6105.35	13684.8	12981.8	8898.15	13935.2	14197.8	12291.7								YER089C	1395	1.395	7619.63	4376.59	9809.89	9305.91	6378.61	9989.4	10177.6	8811.23
YER090W	10270	8443	12788	12881	11734	10807	14256	13791								YER090W	11241.2	4974.66	15733.3	13992	10994.1	15353	15580.3	14223.4								YER090W	1524	1.524	7376.14	3264.22	10323.7	9181.08	7213.97	10074.2	10223.3	9332.93
YER090C-A	0	1	0	1	0	1	1	0								YER090C-A	0	0.589206	0	1.08625	0	1.42066	1.0929	0								YER090C-A	90	0.09	0	6.54673	0	12.0694	0	15.7851	12.1433	0
YER091C	78294	76291	76120	82556	106417	83883	111557	107863								YER091C	85698.3	44951.1	93651.6	89676.3	99706.7	119169	121920	111245								YER091C	2304	2.304	37195.5	19510	40647.4	38922	43275.5	51722.6	52916.8	48283.4
YER091C-A	1	0	0	2	1	0	0	0								YER091C-A	1.09457	0	0	2.1725	0.936944	0	0	0								YER091C-A	222	0.222	4.9305	0	0	9.78602	4.22047	0	0	0
YER092W	644	980	991	980	596	505	689	613								YER092W	704.904	577.422	1219.24	1064.52	558.418	717.431	753.005	632.219								YER092W	378	0.378	1864.82	1527.57	3225.51	2816.2	1477.3	1897.97	1992.08	1672.54
YER093C	1620	1526	3297	3651	1974	1952	2943	2611								YER093C	1773.2	899.128	4056.35	3965.89	1849.53	2773.12	3216.39	2692.86								YER093C	4293	4.293	413.046	209.44	944.875	923.804	430.824	645.963	749.218	627.268
YER093C-A	598	760	951	904	474	483	679	569								YER093C-A	654.553	447.796	1170.03	981.968	444.111	686.177	742.077	586.84								YER093C-A	414	0.414	1581.05	1081.63	2826.16	2371.9	1072.73	1657.43	1792.46	1417.49
YER094C	5991	8556	8924	8992	6199	5391	7107	6560								YER094C	6557.57	5041.24	10979.3	9767.54	5808.11	7658.76	7767.21	6765.68								YER094C	618	0.618	10611	8157.35	17765.9	15805.1	9398.24	12392.8	12568.3	10947.7
YER095W	1378	1385	2777	2713	1301	1241	1534	1402								YER095W	1508.32	816.05	3416.58	2946.99	1218.96	1763.03	1676.5	1445.96								YER095W	1203	1.203	1253.8	678.346	2840.05	2449.7	1013.27	1465.53	1393.6	1201.96
YER096W	168	176	275	266	203	211	201	210								YER096W	183.888	103.7	338.337	288.942	190.2	299.758	219.672	216.584								YER096W	1539	1.539	119.485	67.3816	219.842	187.747	123.586	194.775	142.737	140.73
YER097W	330	921	141	139	414	400	439	426								YER097W	361.208	542.658	173.474	150.988	387.895	568.263	479.781	439.356								YER097W	330	0.33	1094.57	1644.42	525.68	457.541	1175.44	1722.01	1453.88	1331.38
YER098W	468	372	1107	1140	435	435	726	600								YER098W	512.259	219.185	1361.96	1238.32	407.571	617.986	793.443	618.812								YER098W	2265	2.265	226.163	96.7702	601.306	546.721	179.943	272.841	350.306	273.206
YER099C	1299	1177	1985	1948	1345	1219	1688	1644								YER099C	1421.85	693.495	2442.18	2116.01	1260.19	1731.78	1844.81	1695.54								YER099C	957	0.957	1485.73	724.655	2551.91	2211.09	1316.81	1809.59	1927.7	1771.73
YER100W	3130	3468	4448	4771	3227	2897	4107	3655								YER100W	3426.01	2043.37	5472.44	5182.49	3023.52	4115.64	4488.52	3769.6								YER100W	753	0.753	4549.81	2713.63	7267.52	6882.46	4015.3	5465.66	5960.86	5006.1
YER101C	567	421	972	870	459	441	643	597								YER101C	620.622	248.056	1195.87	945.036	430.057	626.509	702.732	615.718								YER101C	1293	1.293	479.986	191.845	924.877	730.886	332.604	484.539	543.49	476.193
YER102W	67092	133231	58060	56987	72870	66008	80517	74854								YER102W	73437	78500.5	71432.1	61902	68275.1	93774.7	87996.7	77200.9								YER102W	603	0.603	121786	130183	118461	102657	113226	155514	145932	128028
YER103W	485	439	2786	2787	476	450	752	575								YER103W	530.867	258.661	3427.66	3027.37	445.985	639.295	821.858	593.028								YER103W	1929	1.929	275.203	134.091	1776.91	1569.4	231.2	331.413	426.054	307.428
YER104W	304	309	406	411	253	261	320	315								YER104W	332.75	182.065	499.508	446.448	237.047	370.791	349.727	324.876								YER104W	627	0.627	530.701	290.374	796.663	712.038	378.065	591.374	557.778	518.144
YER105C	9519	8203	13616	14380	10665	9942	14411	13034								YER105C	10419.2	4833.25	16752	15620.2	9992.5	14124.2	15749.7	13442.7								YER105C	4176	4.176	2495.02	1157.39	4011.49	3740.48	2392.84	3382.22	3771.49	3219.03
YER106W	6	15	23	20	16	13	17	15								YER106W	6.56743	8.83809	28.2972	21.725	14.9911	18.4685	18.5792	15.4703								YER106W	909	0.909	7.22489	9.72287	31.1301	23.8998	16.4919	20.3174	20.4392	17.019
YER107C	3399	3669	4193	4343	3408	3225	4147	3876								YER107C	3720.45	2161.8	5158.71	4717.58	3193.1	4581.62	4532.24	3997.52								YER107C	1098	1.098	3388.38	1968.85	4698.28	4296.52	2908.11	4172.69	4127.72	3640.73
YER107W-A	1	2	0	0	2	0	1	0								YER107W-A	1.09457	1.17841	0	0	1.87389	0	1.0929	0								YER107W-A	321	0.321	3.40988	3.67106	0	0	5.83766	0	3.40466	0
YER109C	1494	611	2029	2124	1444	1449	2088	1812								YER109C	1635.29	360.005	2496.31	2307.19	1352.95	2058.53	2281.97	1868.81								YER109C	2400	2.4	681.37	150.002	1040.13	961.33	563.728	857.721	950.82	778.672
YER110C	47017	56369	33319	36290	60367	54704	63714	61917								YER110C	51463.4	33212.9	40992.9	39419.9	56560.5	77715.6	69632.8	63858.3								YER110C	3342	3.342	15399	9938.04	12266	11795.3	16924.1	23254.2	20835.7	19107.8
YER111C	1614	2397	4946	5927	1845	1949	3524	2876								YER111C	1766.64	1412.33	6085.14	6438.19	1728.66	2768.86	3851.37	2966.17								YER111C	3282	3.282	538.281	430.325	1854.09	1961.67	526.71	843.65	1173.48	903.77
YER112W	1157	2020	1973	2022	1435	1269	1806	1617								YER112W	1266.42	1190.2	2427.41	2196.39	1344.51	1802.81	1973.77	1667.7								YER112W	564	0.564	2245.42	2110.28	4303.92	3894.31	2383.89	3196.48	3499.59	2956.91
YER113C	3469	3554	3512	3581	3773	3693	4876	4427								YER113C	3797.07	2094.04	4320.87	3889.85	3535.09	5246.48	5328.96	4565.8								YER113C	2121	2.121	1790.22	987.288	2037.18	1833.97	1666.71	2473.59	2512.48	2152.66
YER115C	470	455	292	329	455	501	567	545								YER115C	514.448	268.089	359.252	357.376	426.309	711.749	619.672	562.087								YER115C	576	0.576	893.139	465.432	623.701	620.444	740.12	1235.68	1075.82	975.846
YER116C	555	325	923	927	544	582	757	680								YER116C	607.487	191.492	1135.58	1006.95	509.697	826.822	827.322	701.32								YER116C	825	0.825	736.348	232.111	1376.46	1220.55	617.815	1002.21	1002.82	850.085
YER117W	33307	59094	27699	26821	34145	29926	34042	32092								YER117W	36456.9	34818.5	34078.5	29134.3	31991.9	42514.6	37204.4	33098.2								YER117W	414	0.414	88060.1	84102.7	82315.2	70372.6	77275.2	102692	89865.6	79947.3
YER118C	4098	4630	5880	5906	4489	4227	5554	5095								YER118C	4485.55	2728.02	7234.25	6415.38	4205.94	6005.11	6069.95	5254.74								YER118C	1104	1.104	4063	2471.03	6552.76	5811.03	3809.73	5439.42	5498.14	4759.73
YER119C	2462	3599	3293	3170	2098	1971	2825	2650								YER119C	2694.83	2120.55	4051.43	3443.41	1965.71	2800.11	3087.43	2733.09								YER119C	1347	1.347	2000.62	1574.28	3007.74	2556.35	1459.32	2078.78	2292.08	2029.02
YER119C-A	7	4	12	12	6	9	12	7								YER119C-A	7.662	2.35682	14.7638	13.035	5.62166	12.7859	13.1148	7.21947								YER119C-A	372	0.372	20.5968	6.33555	39.6876	35.0403	15.112	34.3707	35.2547	19.4072
YER120W	23863	32351	24997	26340	23939	21099	27417	25401								YER120W	26119.7	19061.4	30754.2	28611.8	22429.5	29974.4	29963.9	26197.4								YER120W	735	0.735	35537.1	25933.9	41842.4	38927.6	30516.3	40781.5	40767.3	35642.7
YER121W	41	67	243	221	35	28	64	35								YER121W	44.8774	39.4768	298.967	240.061	32.793	39.7784	69.9454	36.0974								YER121W	345	0.345	130.079	114.425	866.57	695.828	95.0523	115.3	202.74	104.63
YER122C	9169	11711	13310	13798	9225	8295	12896	11692								YER122C	10036.1	6900.19	16375.5	14988.1	8643.31	11784.3	14094	12058.6								YER122C	1482	1.482	6772.01	4656	11049.6	10113.4	5832.19	7951.65	9510.11	8136.69
YER123W	1724	2314	3106	3591	1893	1810	2805	2557								YER123W	1887.04	1363.42	3821.36	3900.72	1773.63	2571.39	3065.57	2637.17								YER123W	1575	1.575	1198.12	865.665	2426.26	2476.65	1126.12	1632.63	1946.4	1674.39
YER124C	5625	9659	16200	17791	5987	5227	8954	7808								YER124C	6156.96	5691.14	19931.1	19325.4	5609.48	7425.77	9785.79	8052.81								YER124C	1722	1.722	3575.47	3304.96	11574.4	11222.7	3257.54	4312.29	5682.81	4676.43
YER125W	13780	8794	18657	19329	14198	13757	19038	16518								YER125W	15083.2	5181.48	22954	20996.1	13302.7	19544	20806.6	17035.9								YER125W	2430	2.43	6207.07	2132.29	9446.08	8640.37	5474.37	8042.79	8562.37	7010.65
YER126C	2123	4122	2728	2911	2359	2206	2594	2612								YER126C	2323.77	2428.71	3356.3	3162.07	2210.25	3133.97	2834.97	2693.89								YER126C	786	0.786	2956.46	3089.96	4270.1	4022.99	2812.02	3987.24	3606.84	3427.35
YER127W	1347	1283	2164	2517	1522	1598	1905	1875								YER127W	1474.39	755.951	2662.4	2734.09	1426.03	2270.21	2081.97	1933.79								YER127W	1074	1.074	1372.8	703.865	2478.96	2545.7	1327.77	2113.79	1938.52	1800.55
YER128W	435	337	510	575	377	353	501	438								YER128W	476.138	198.562	627.461	624.593	353.228	501.492	547.541	451.733								YER128W	612	0.612	778.004	324.448	1025.26	1020.58	577.17	819.431	894.675	738.125
YER129W	3231	1621	4326	4681	3300	3355	4848	4338								YER129W	3536.56	955.103	5322.34	5084.73	3091.91	4766.3	5298.36	4474.01								YER129W	3429	3.429	1031.37	278.537	1552.16	1482.86	901.696	1390	1545.16	1304.76
YER130C	1351	1908	3801	4059	1513	1351	1925	1815								YER130C	1478.77	1124.2	4676.43	4409.08	1417.6	1919.31	2103.83	1871.91								YER130C	1332	1.332	1110.18	843.997	3510.83	3310.12	1064.26	1440.92	1579.45	1405.33
YER131W	39927	77317	45773	45494	42722	38282	51420	47445								YER131W	43702.9	45555.6	56315.2	49417.8	40028.1	54385.6	56196.7	48932.5								YER131W	360	0.36	121397	126543	156431	137272	111189	151071	156102	135924
YER132C	5629	2843	7250	8178	5999	6434	9020	7887								YER132C	6161.34	1675.11	8919.78	8883.34	5620.73	9140.5	9857.92	8134.28								YER132C	5262	5.262	1170.91	318.341	1695.13	1688.21	1068.17	1737.08	1873.42	1545.85
YER133W	4135	8209	7044	7707	5080	4353	6312	5865								YER133W	4526.05	4836.79	8666.34	8371.71	4759.67	6184.12	6898.36	6048.89								YER133W	939	0.939	4820.08	5151	9229.33	8915.56	5068.88	6585.85	7346.5	6441.84
YER133W-A	1	0	0	0	0	0	0	0								YER133W-A	1.09457	0	0	0	0	0	0	0								YER133W-A	342	0.342	3.2005	0	0	0	0	0	0	0
YER134C	1089	1459	1680	1678	1016	900	1246	1085								YER134C	1191.99	859.651	2066.93	1822.72	951.935	1278.59	1361.75	1119.02								YER134C	537	0.537	2219.72	1600.84	3849.03	3394.27	1772.69	2380.99	2535.84	2083.83
YER135C	2	5	7	9	3	2	9	3								YER135C	2.18914	2.94603	8.6122	9.77623	2.81083	2.84131	9.83607	3.09406								YER135C	393	0.393	5.57034	7.49626	21.914	24.8759	7.15224	7.2298	25.0282	7.87292
YER136W	9079	14310	15061	15649	9589	8528	12521	11180								YER136W	9937.61	8431.53	18529.8	16998.7	8984.35	12115.4	13684.2	11530.5								YER136W	1356	1.356	7328.62	6217.95	13665	12535.9	6625.63	8934.63	10091.6	8503.34
YER137C	186	296	391	403	176	180	242	199								YER137C	203.59	174.405	481.053	437.758	164.902	255.718	264.481	205.239								YER137C	447	0.447	455.459	390.168	1076.18	979.324	368.908	572.076	591.68	459.148
YER137W-A	2	6	3	0	4	2	2	3								YER137W-A	2.18914	3.53523	3.69094	0	3.74777	2.84131	2.18579	3.09406								YER137W-A	306	0.306	7.15406	11.5531	12.0619	0	12.2476	9.28534	7.14311	10.1113
YER138C	54591	26847	102388	116218	91451	103160	164975	130175								YER138C	59753.7	15818.4	125969	126242	85684.4	146555	180301	134256								YER138C	5268	5.268	11342.8	3002.73	23912.2	23963.9	16265.1	27819.8	34225.6	25485.3
YER137C-A	0	0	0	0	0	0	0	0								YER137C-A	0	0	0	0	0	0	0	0								YER137C-A	1323	1.323	0	0	0	0	0	0	0	0
YER138W-A	550	1225	455	472	701	623	731	691								YER138W-A	602.014	721.777	559.793	512.709	656.798	885.069	798.907	712.665								YER138W-A	105	0.105	5733.47	6874.07	5331.36	4882.94	6255.21	8429.23	7608.64	6787.29
YER139C	260	438	485	471	281	283	381	312								YER139C	284.588	258.072	596.703	511.623	263.281	402.046	416.393	321.782								YER139C	681	0.681	417.898	378.961	876.216	751.282	386.61	590.376	611.444	472.514
YER140W	576	819	798	814	679	654	835	743								YER140W	630.473	482.56	981.791	884.206	636.185	929.109	912.568	766.295								YER140W	1671	1.671	377.303	288.785	587.547	529.148	380.721	556.02	546.121	458.585
YER141W	6734	6549	11050	10539	6417	5248	8119	7437								YER141W	7370.84	3858.71	13595	11448	6012.37	7455.6	8873.22	7670.17								YER141W	1461	1.461	5045.07	2641.14	9305.26	7835.71	4115.24	5103.08	6073.39	5249.95
YER142C	221	355	213	285	223	171	299	206								YER142C	241.9	209.168	262.057	309.581	208.938	242.932	326.776	212.459								YER142C	891	0.891	271.493	234.756	294.116	347.453	234.499	272.651	366.752	238.45
YER143W	2617	3047	3780	3715	2370	2025	2987	2595								YER143W	2864.49	1795.31	4650.59	4035.41	2220.56	2876.83	3264.48	2676.36								YER143W	1287	1.287	2225.71	1394.96	3613.51	3135.52	1725.37	2235.3	2536.5	2079.53
YER144C	2962	1646	6056	6184	2910	2944	4578	3787								YER144C	3242.12	969.833	7450.79	6717.36	2726.51	4182.41	5003.28	3905.73								YER144C	2418	2.418	1340.83	401.089	3081.38	2778.06	1127.59	1729.7	2069.18	1615.27
YER145C	5038	5182	3535	4255	3653	4021	4607	3852								YER145C	5514.45	3053.26	4349.16	4621.99	3422.66	5712.46	5034.97	3972.77								YER145C	1215	1.215	4538.64	2512.97	3579.56	3804.1	2817	4701.61	4144.01	3269.77
YER145C-A	4	8	6	9	2	5	4	5								YER145C-A	4.37828	4.71365	7.38189	9.77623	1.87389	7.10328	4.37158	5.15677								YER145C-A	438	0.438	9.99608	10.7617	16.8536	22.3202	4.27828	16.2175	9.98079	11.7734
YER146W	1344	2818	1367	1256	1290	1191	1616	1573								YER146W	1471.1	1660.38	1681.84	1364.33	1208.66	1692	1766.12	1622.32								YER146W	282	0.282	5216.68	5887.88	5963.97	4838.04	4286.02	6000.01	6262.84	5752.9
YER147C	491	387	748	693	494	482	592	584								YER147C	537.434	228.023	920.276	752.77	462.85	684.756	646.995	602.31								YER147C	1875	1.875	286.632	121.612	490.814	401.477	246.853	365.203	345.064	321.232
YER147C-A	0	3	2	3	1	1	0	0								YER147C-A	0	1.76762	2.46063	3.25874	0.936944	1.42066	0	0								YER147C-A	411	0.411	0	4.30077	5.98693	7.92882	2.27967	3.45658	0	0
YER148W	5238	8873	4865	4860	5532	5402	7153	6712								YER148W	5733.36	5228.02	5985.48	5279.17	5183.17	7674.39	7817.49	6922.44								YER148W	723	0.723	7929.96	7231.01	8278.68	7301.75	7168.98	10614.6	10812.6	9574.61
YER148W-A	27	24	13	8	13	12	32	25								YER148W-A	29.5534	14.1409	15.9941	8.68998	12.1803	17.0479	34.9727	25.7838								YER148W-A	579	0.579	51.0422	24.423	27.6237	15.0086	21.0367	29.4437	60.4019	44.5317
YER149C	1638	2261	1913	1838	1669	1648	2100	1915								YER149C	1792.91	1332.19	2353.59	1996.52	1563.76	2341.24	2295.08	1975.04								YER149C	1263	1.263	1419.56	1054.79	1863.49	1580.78	1238.13	1853.71	1817.17	1563.77
YER150W	349	307	2613	2818	305	222	458	399								YER150W	382.005	180.886	3214.81	3061.05	285.768	315.386	500.546	411.51								YER150W	447	0.447	854.598	404.667	7191.98	6847.98	639.302	705.561	1119.79	920.604
YER151C	5998	4306	8422	9869	7023	6916	9902	9030								YER151C	6565.24	2537.12	10361.7	10720.2	6580.16	9825.26	10821.9	9313.12								YER151C	2739	2.739	2396.95	926.294	3783.03	3913.9	2402.39	3587.17	3951.03	3400.19
YER152C	3309	5719	3480	3627	3157	3120	3807	3779								YER152C	3621.94	3369.67	4281.5	3939.82	2957.93	4432.45	4160.66	3897.48								YER152C	1332	1.332	2719.17	2529.78	3214.34	2957.82	2220.67	3327.66	3123.62	2926.04
YER152W-A	9	6	13	9	6	5	4	5								YER152W-A	9.85114	3.53523	15.9941	9.77623	5.62166	7.10328	4.37158	5.15677								YER152W-A	567	0.567	17.3741	6.23498	28.2083	17.242	9.91475	12.5278	7.71003	9.09482
YER153C	315	604	258	313	262	286	339	282								YER153C	344.79	355.88	317.421	339.996	245.479	406.308	370.492	290.842								YER153C	765	0.765	450.706	465.203	414.93	444.439	320.888	531.121	484.303	380.185
YER154W	7640	9452	7707	7847	6758	7266	9920	9095								YER154W	8362.52	5569.17	9482.04	8523.79	6331.87	10322.5	10841.5	9380.16								YER154W	1209	1.209	6916.89	4606.43	7842.88	7050.28	5237.27	8538.04	8967.35	7758.61
YER155C	11306	11545	23308	25785	14043	13811	22470	19444								YER155C	12375.2	6802.38	28676.2	28008.9	13157.5	19620.7	24557.4	20053.6								YER155C	6504	6.504	1902.71	1045.88	4409.01	4306.41	2022.99	3016.71	3775.73	3083.28
YER156C	5796	5674	5927	5924	5986	5587	7033	6732								YER156C	6344.13	3343.15	7292.08	6434.93	5608.54	7937.21	7686.34	6943.07								YER156C	1017	1.017	6238.09	3287.27	7170.18	6327.37	5514.79	7804.53	7557.86	6827.01
YER157W	1500	2377	2417	2492	1724	1642	2421	2095								YER157W	1641.86	1400.54	2973.67	2706.93	1615.29	2332.72	2645.9	2160.68								YER157W	2406	2.406	682.401	582.104	1235.94	1125.07	671.359	969.542	1099.71	898.04
YER158C	625	562	1593	1624	522	540	794	665								YER158C	684.107	331.134	1959.89	1764.07	489.085	767.154	867.76	685.85								YER158C	1722	1.722	397.275	192.296	1138.15	1024.43	284.021	445.502	503.925	398.287
YER158W-A	16	22	14	13	8	12	25	16								YER158W-A	17.5131	12.9625	17.2244	14.1212	7.49555	17.0479	27.3224	16.5017								YER158W-A	216	0.216	81.0793	60.0117	79.7426	65.376	34.7016	78.9254	126.493	76.3965
YER159C	735	1691	1403	1658	936	827	1196	1175								YER159C	804.51	996.347	1726.13	1801	876.979	1174.88	1307.1	1211.84								YER159C	429	0.429	1875.31	2322.49	4023.62	4198.13	2044.24	2738.65	3046.86	2824.8
YER160C	23786	11946	31803	36209	36833	41527	61330	48732								YER160C	26035.5	7038.65	39127.7	39332	34510.4	58995.6	67027.3	50259.9								YER160C	5268	5.268	4942.19	1336.11	7427.43	7466.2	6550.96	11198.9	12723.5	9540.6
YER159C-A	0	0	0	0	0	0	0	0								YER159C-A	0	0	0	0	0	0	0	0								YER159C-A	1323	1.323	0	0	0	0	0	0	0	0
YER161C	1213	808	1743	1909	1205	1221	1663	1513								YER161C	1327.71	476.078	2144.44	2073.65	1129.02	1734.62	1817.49	1560.44								YER161C	1002	1.002	1325.06	475.128	2140.16	2069.51	1126.76	1731.16	1813.86	1557.32
YER162C	211	174	727	766	262	208	363	291								YER162C	230.954	102.522	894.439	832.066	245.479	295.497	396.721	300.124								YER162C	2265	2.265	101.967	45.2635	394.896	367.358	108.379	130.462	175.153	132.505
YER163C	1200	1831	1547	1535	1097	1113	1399	1208								YER163C	1313.49	1078.84	1903.3	1667.39	1027.83	1581.19	1528.96	1245.87								YER163C	699	0.699	1879.09	1543.4	2722.89	2385.39	1470.43	2262.08	2187.36	1782.37
YER164W	5735	3865	6509	7489	6313	6285	8855	7933								YER164W	6277.36	2277.28	8008.12	8134.91	5914.93	8928.83	9677.6	8181.72								YER164W	4407	4.407	1424.41	516.742	1817.14	1845.91	1342.17	2026.06	2195.96	1856.53
YER165W	73575	64726	53038	57032	85312	80756	101392	92065								YER165W	80533.1	38136.9	65253.4	61950.9	79932.5	114727	110811	94951.5								YER165W	1734	1.734	46443.5	21993.6	37631.7	35727.2	46097.2	66162.9	63904.8	54758.7
YER165C-A	0	0	0	0	2	0	0	1								YER165C-A	0	0	0	0	1.87389	0	0	1.03135								YER165C-A	357	0.357	0	0	0	0	5.24898	0	0	2.88894
YER166W	8740	7127	10960	11816	9601	9289	12959	11601								YER166W	9566.55	4199.27	13484.3	12835.1	8995.6	13196.5	14162.8	11964.7								YER166W	4716	4.716	2028.53	890.43	2859.26	2721.61	1907.46	2798.24	3003.15	2537.05
YER167W	3359	2039	7870	8412	3536	3716	5963	5258								YER167W	3676.66	1201.39	9682.58	9137.52	3313.03	5279.16	6516.94	5422.85								YER167W	2556	2.556	1438.44	470.028	3788.18	3574.93	1296.18	2065.4	2549.66	2121.62
YER168C	1372	2132	1898	1818	1527	1452	1765	1744								YER168C	1501.75	1256.19	2335.14	1974.8	1430.71	2062.79	1928.96	1798.68								YER168C	1641	1.641	915.144	765.501	1423	1203.41	871.854	1257.03	1175.48	1096.09
YER170W	1072	1519	1647	1669	951	923	1380	1159								YER170W	1173.38	895.004	2026.33	1812.95	891.033	1311.27	1508.2	1195.34								YER170W	678	0.678	1730.65	1320.06	2988.69	2673.96	1314.21	1934.02	2224.48	1763.04
YER171W	2270	2263	2904	3093	2490	2285	3093	2895								YER171W	2484.68	1333.37	3572.83	3359.77	2332.99	3246.2	3380.33	2985.77								YER171W	2337	2.337	1063.19	570.549	1528.81	1437.64	998.284	1389.05	1446.44	1277.61
YER172C	3638	3537	7823	8932	4351	4193	6863	6039								YER172C	3982.05	2084.02	9624.75	9702.37	4076.64	5956.81	7500.55	6228.34								YER172C	6492	6.492	613.378	321.014	1482.56	1494.51	627.949	917.562	1155.35	959.387
YER172C-A	0	0	0	0	0	1	0	0								YER172C-A	0	0	0	0	0	1.42066	0	0								YER172C-A	381	0.381	0	0	0	0	0	3.72876	0	0
YER173W	983	737	1156	1279	925	890	1267	1163								YER173W	1075.96	434.245	1422.24	1389.31	866.673	1264.38	1384.7	1199.46								YER173W	1980	1.98	543.416	219.315	718.305	701.672	437.714	638.578	699.343	605.79
YER174C	2055	3481	2105	1975	1897	1843	2267	2028								YER174C	2249.34	2051.03	2589.81	2145.34	1777.38	2618.27	2477.6	2091.58								YER174C	735	0.735	3060.33	2790.51	3523.56	2918.83	2418.21	3562.27	3370.88	2845.69
YER175C	479	320	1149	1163	502	422	635	615								YER175C	524.299	188.546	1413.63	1263.31	470.346	599.517	693.989	634.282								YER175C	900	0.9	582.555	209.495	1570.7	1403.67	522.606	666.13	771.099	704.758
YER175W-A	13	11	10	14	6	4	15	5								YER175W-A	14.2294	6.48126	12.3031	15.2075	5.62166	5.68263	16.3934	5.15677								YER175W-A	165	0.165	86.2389	39.2804	74.5645	92.1665	34.0707	34.4402	99.3542	31.2531
YER176W	2621	2220	4134	4627	3052	3158	4438	4031								YER176W	2868.87	1308.04	5086.12	5026.07	2859.55	4486.43	4850.27	4157.38								YER176W	3366	3.366	852.308	388.603	1511.03	1493.19	849.54	1332.87	1440.96	1235.11
YER177W	52860	67139	70549	71383	50403	46115	64450	58487								YER177W	57859	39558.7	86797.5	77539.6	47224.8	65513.6	70437.2	60320.8								YER177W	804	0.804	71964	49202.3	107957	96442.3	58737.3	81484.5	87608.4	75025.8
YER178W	22500	30222	23888	23698	22922	20466	25814	25494								YER178W	24627.8	17807	29389.8	25741.9	21476.6	29075.2	28212	26293.3								YER178W	1263	1.263	19499.5	14099	23269.8	20381.6	17004.5	23020.7	22337.3	20818.1
YER179W	24	48	48	61	34	21	33	45								YER179W	26.2697	28.2819	59.0551	66.2611	31.8561	29.8338	36.0656	46.4109								YER179W	1005	1.005	26.139	28.1412	58.7613	65.9315	31.6976	29.6854	35.8861	46.18
YER180C	599	405	606	626	524	657	808	793								YER180C	655.648	238.628	745.571	679.991	490.958	933.371	883.06	817.863								YER180C	804	0.804	815.483	296.801	927.327	845.76	610.645	1160.91	1098.33	1017.24
YER180C-A	59	57	71	54	56	68	72	61								YER180C-A	64.5797	33.5847	87.3524	58.6574	52.4688	96.6046	78.6885	62.9125								YER180C-A	258	0.258	250.309	130.173	338.575	227.354	203.368	374.437	304.994	243.847
YER181C	21	32	24	22	22	10	23	17								YER181C	22.986	18.8546	29.5276	23.8975	20.6128	14.2066	25.1366	17.533								YER181C	324	0.324	70.9444	58.1932	91.1344	73.7576	63.6196	43.8474	77.5821	54.1142
YER182W	569	781	1189	1094	526	523	741	657								YER182W	622.811	460.17	1462.84	1188.36	492.832	743.003	809.836	677.599								YER182W	735	0.735	847.362	626.081	1990.26	1616.81	670.52	1010.89	1101.82	921.903
YER183C	895	1209	999	932	814	800	1002	1008								YER183C	979.641	712.35	1229.08	1012.38	762.672	1136.53	1095.08	1039.6								YER183C	636	0.636	1540.32	1120.05	1932.52	1591.8	1199.17	1786.99	1721.83	1634.6
YER184C	430	271	680	782	522	523	680	605								YER184C	470.665	159.675	836.614	849.446	489.085	743.003	743.169	623.969								YER184C	2385	2.385	197.344	66.9496	350.782	356.162	205.067	311.532	311.601	261.622
YER185W	48	72	91	115	54	77	77	45								YER185W	52.5394	42.4228	111.959	124.919	50.595	109.391	84.153	46.4109								YER185W	912	0.912	57.609	46.5162	122.762	136.972	55.4769	119.946	92.273	50.8891
YER186C	659	1045	673	581	636	643	856	882								YER186C	721.322	615.72	828.002	631.11	595.896	913.482	935.519	909.653								YER186C	921	0.921	783.195	668.534	899.025	685.244	647.01	991.837	1015.76	987.68
YER187W	7	12	5	2	9	11	9	11								YER187W	7.662	7.07047	6.15157	2.1725	8.43249	15.6272	9.83607	11.3449								YER187W	426	0.426	17.9859	16.5973	14.4403	5.09976	19.7946	36.6836	23.0894	26.6312
YER188W	76	143	41	42	63	75	106	81								YER188W	83.1874	84.2564	50.4429	45.6224	59.0275	106.549	115.847	83.5396								YER188W	720	0.72	115.538	117.023	70.0596	63.3645	81.9826	147.985	160.899	116.027
YER188C-A	129	41	65	93	75	88	115	91								YER188C-A	141.2	24.1574	79.9705	101.021	70.2708	125.018	125.683	93.8531								YER188C-A	300	0.3	470.665	80.5248	266.568	336.737	234.236	416.726	418.944	312.844
YER189W	69	43	62	63	63	53	65	79								YER189W	75.5254	25.3358	76.2795	68.4336	59.0275	75.2948	71.0383	81.4769								YER189W	369	0.369	204.676	68.6608	206.72	185.457	159.966	204.051	192.516	220.805
YER190W	2052	1059	2874	3025	2182	2379	3044	2773								YER190W	2246.06	623.969	3535.93	3285.9	2044.41	3379.74	3326.78	2859.94								YER190W	5046	5.046	445.117	123.656	700.738	651.189	405.155	669.786	659.29	566.774
YER190C-A	0	1	7	8	3	0	4	3								YER190C-A	0	0.589206	8.6122	8.68998	2.81083	0	4.37158	3.09406								YER190C-A	576	0.576	0	1.02293	14.9517	15.0868	4.87992	0	7.58956	5.37163
YER190C-B	12	9	20	29	14	12	11	18								YER190C-B	13.1349	5.30285	24.6063	31.5012	13.1172	17.0479	12.0219	18.5644								YER190C-B	483	0.483	27.1943	10.979	50.9447	65.2199	27.1578	35.2958	24.89	38.4355
YJL091C	2803	5684	3193	3299	2933	2497	3426	3108								YJL091C	3068.08	3349.05	3928.4	3583.53	2748.06	3547.38	3744.26	3205.45								YJL091C	1473	1.473	2082.88	2273.62	2666.94	2432.81	1865.62	2408.27	2541.93	2176.13
YJL026W	16077	21151	17695	17262	19748	16036	18355	18173								YJL026W	17597.4	12462.3	21770.4	18750.8	18502.8	22781.6	20060.1	18742.8								YJL026W	1200	1.2	14664.5	10385.2	18142	15625.7	15419	18984.7	16716.8	15619
YJL026C-A	3	0	1	0	2	3	1	1								YJL026C-A	3.28371	0	1.23031	0	1.87389	4.26197	1.0929	1.03135								YJL026C-A	222	0.222	14.7915	0	5.54196	0	8.44093	19.1981	4.92296	4.64573
YJR125C	3235	2872	4927	5050	3219	2768	4056	3676								YJR125C	3540.94	1692.2	6061.76	5485.55	3016.02	3932.38	4432.79	3791.25								YJR125C	1227	1.227	2885.85	1379.14	4940.31	4470.7	2458.05	3204.87	3612.7	3089.86
YJL225C	3019	1172	3658	3658	2881	3271	4208	3623								YJL225C	3304.51	690.549	4500.49	3973.5	2699.33	4646.97	4598.91	3736.59								YJL225C	5277	5.277	626.21	130.86	852.851	752.984	511.528	880.608	871.5	708.09
YJL225W-A	10	9	18	23	13	14	9	11								YJL225W-A	10.9457	5.30285	22.1457	24.9837	12.1803	19.8892	9.83607	11.3449								YJL225W-A	483	0.483	22.6619	10.979	45.8502	51.7261	25.2179	41.1784	20.3645	23.4884
YJL223C	247	179	212	220	237	217	323	270								YJL223C	270.359	105.468	260.827	238.975	222.056	308.282	353.005	278.465								YJL223C	363	0.363	744.791	290.545	718.531	658.332	611.724	849.263	972.467	767.122
YJL222W-B	0	0	0	0	0	0	0	0								YJL222W-B	0	0	0	0	0	0	0	0								YJL222W-B	138	0.138	0	0	0	0	0	0	0	0
YJL222W-A	0	0	0	0	0	0	0	0								YJL222W-A	0	0	0	0	0	0	0	0								YJL222W-A	228	0.228	0	0	0	0	0	0	0	0
YJL222W	1202	1011	2391	2494	1647	1541	2126	1834								YJL222W	1315.67	595.687	2941.68	2709.1	1543.15	2189.23	2323.5	1891.5								YJL222W	4650	4.65	282.941	128.105	632.62	582.603	331.859	470.802	499.677	406.775
YJL221C	88	89	144	151	104	92	90	80								YJL221C	96.3222	52.4393	177.165	164.023	97.4421	130.7	98.3607	82.5083								YJL221C	1770	1.77	54.4193	29.6267	100.093	92.6686	55.0521	73.842	55.571	46.6148
YJL220W	0	0	0	1	0	0	0	0								YJL220W	0	0	0	1.08625	0	0	0	0								YJL220W	453	0.453	0	0	0	2.3979	0	0	0	0
YJL219W	36	48	68	75	57	44	68	44								YJL219W	39.4046	28.2819	83.6614	81.4686	53.4058	62.5089	74.3169	45.3795								YJL219W	1704	1.704	23.1247	16.5973	49.0971	47.8102	31.3414	36.6836	43.6132	26.6312
YJL218W	187	171	256	244	185	142	201	157								YJL218W	204.685	100.754	314.961	265.045	173.335	201.733	219.672	161.922								YJL218W	591	0.591	346.336	170.481	532.928	448.468	293.29	341.342	371.696	273.98
YJL217W	3607	5687	6487	5601	5923	6392	7176	6417								YJL217W	3948.12	3350.81	7981.05	6084.08	5549.52	9080.84	7842.62	6618.19								YJL217W	597	0.597	6613.26	5612.75	13368.6	10191.1	9295.67	15210.8	13136.7	11085.8
YJL216C	143	150	242	216	200	151	220	223								YJL216C	156.524	88.3809	297.736	234.63	187.389	214.519	240.437	229.992								YJL216C	1746	1.746	89.647	50.6191	170.525	134.381	107.325	122.863	137.707	131.725
YJL215C	45	22	52	60	27	43	51	39								YJL215C	49.2557	12.9625	63.9764	65.1749	25.2975	61.0882	55.7377	40.2228								YJL215C	360	0.36	136.821	36.007	177.712	181.041	70.2708	169.69	154.827	111.73
YJL214W	25	50	83	81	46	39	45	32								YJL214W	27.3643	29.4603	102.116	87.9861	43.0994	55.4056	49.1803	33.0033								YJL214W	1710	1.71	16.0025	17.2282	59.717	51.4539	25.2043	32.4009	28.7604	19.3002
YJL213W	198	169	187	138	232	222	228	251								YJL213W	216.725	99.5758	230.069	149.902	217.371	315.386	249.18	258.87								YJL213W	996	0.996	217.595	99.9757	230.993	150.504	218.244	316.652	250.181	259.909
YJL212C	6267	7353	8500	8372	7510	7221	9981	9283								YJL212C	6859.68	4332.43	10457.7	9094.07	7036.45	10258.6	10908.2	9574.05								YJL212C	2400	2.4	2858.2	1805.18	4357.37	3789.2	2931.85	4274.4	4545.08	3989.19
YJL211C	57	48	64	43	51	65	58	68								YJL211C	62.3905	28.2819	78.7402	46.7087	47.7841	92.3427	63.388	70.132								YJL211C	444	0.444	140.519	63.6979	177.343	105.2	107.622	207.979	142.766	157.955
YJL210W	1368	2173	1597	1609	1071	991	1373	1353								YJL210W	1497.37	1280.34	1964.81	1747.77	1003.47	1407.87	1500.55	1395.42								YJL210W	816	0.816	1835.02	1569.05	2407.86	2141.88	1229.74	1725.33	1838.9	1710.07
YJL209W	938	1052	1387	1370	1005	945	1411	1225								YJL209W	1026.71	619.844	1706.45	1488.16	941.628	1342.52	1542.08	1263.41								YJL209W	1965	1.965	522.497	315.442	868.421	757.333	479.2	683.216	784.772	642.956
YJL208C	1436	2170	1706	1714	1491	1541	1721	1614								YJL208C	1571.8	1278.58	2098.92	1861.83	1396.98	2189.23	1880.87	1664.6								YJL208C	990	0.99	1587.68	1291.49	2120.12	1880.64	1411.09	2211.34	1899.87	1681.42
YJL207C	4293	5594	7821	8087	5610	5135	8819	7540								YJL207C	4698.99	3296.02	9622.29	8784.49	5256.25	7295.07	9638.25	7776.4								YJL207C	6045	6.045	777.335	545.247	1591.78	1453.18	869.521	1206.79	1594.42	1286.42
YJL206C	844	729	1381	1396	920	846	1279	1056								YJL206C	923.818	429.531	1699.06	1516.4	861.988	1201.88	1397.81	1089.11								YJL206C	2277	2.277	405.717	188.639	746.186	665.965	378.563	527.833	613.884	478.309
YJL205C	535	658	538	531	442	440	476	388								YJL205C	585.595	387.697	661.909	576.798	414.129	625.089	520.219	400.165								YJL205C	162	0.162	3614.79	2393.19	4085.86	3560.48	2556.35	3858.57	3211.23	2470.15
YJL204C	1061	1885	2298	2482	1336	1166	1986	1741								YJL204C	1161.34	1110.65	2827.26	2696.07	1251.76	1656.49	2170.49	1795.59								YJL204C	2523	2.523	460.301	440.211	1120.6	1068.6	496.138	656.554	860.282	711.687
YJL203W	480	865	904	967	517	457	722	594								YJL203W	525.394	509.663	1112.2	1050.4	484.4	649.24	789.071	612.624								YJL203W	843	0.843	623.243	604.582	1319.34	1246.03	574.614	770.154	936.027	726.719
YJL202C	7	20	7	4	9	3	3	4								YJL202C	7.662	11.7841	8.6122	4.34499	8.43249	4.26197	3.27869	4.12541								YJL202C	348	0.348	22.0172	33.8624	24.7477	12.4856	24.2313	12.247	9.42152	11.8546
YJL201W	3027	2510	5344	5466	3023	2946	4519	4059								YJL201W	3313.27	1478.91	6574.8	5937.43	2832.38	4185.25	4938.8	4186.26								YJL201W	1800	1.8	1840.7	821.615	3652.67	3298.57	1573.54	2325.14	2743.78	2325.7
YJL200C	10228	12479	10880	10850	15127	13549	15474	15802								YJL200C	11195.3	7352.7	13385.8	11785.8	14173.1	19248.5	16911.5	16297.4								YJL200C	2370	2.37	4723.74	3102.4	5648.03	4972.91	5980.23	8121.72	7135.64	6876.56
YJL199C	34	30	95	55	54	40	60	38								YJL199C	37.2154	17.6762	116.88	59.7436	50.595	56.8263	65.5738	39.1914								YJL199C	327	0.327	113.809	54.0556	357.431	182.702	154.725	173.781	200.531	119.851
YJL198W	6235	5701	7526	7684	6914	7408	8855	8259								YJL198W	6824.65	3359.06	9259.35	8346.73	6478.03	10524.2	9677.6	8517.95								YJL198W	2646	2.646	2579.23	1269.49	3499.38	3154.47	2448.23	3977.41	3657.44	3219.18
YJL197W	3593	3306	4193	4656	4008	3789	5297	4899								YJL197W	3932.79	1947.91	5158.71	5057.57	3755.27	5382.87	5789.07	5052.6								YJL197W	3765	3.765	1044.57	517.374	1370.18	1343.31	997.416	1429.71	1537.6	1341.99
YJL197C-A	0	0	0	0	0	0	1	0								YJL197C-A	0	0	0	0	0	0	1.0929	0								YJL197C-A	282	0.282	0	0	0	0	0	0	3.87552	0
YJL196C	2108	3474	2277	2175	2040	1733	2458	2299								YJL196C	2307.36	2046.9	2801.43	2362.59	1911.37	2462	2686.34	2371.08								YJL196C	933	0.933	2473.05	2193.89	3002.6	2532.25	2048.62	2638.8	2879.25	2541.35
YJL195C	1	1	1	3	4	0	5	3								YJL195C	1.09457	0.589206	1.23031	3.25874	3.74777	0	5.46448	3.09406								YJL195C	702	0.702	1.55922	0.839324	1.75259	4.64209	5.33871	0	7.78416	4.40749
YJL194W	1533	1741	2764	2816	1508	1451	2133	2104								YJL194W	1677.98	1025.81	3400.59	3058.87	1412.91	2061.37	2331.15	2169.97								YJL194W	1542	1.542	1088.18	665.245	2205.31	1983.71	916.285	1336.82	1511.77	1407.24
YJL193W	1436	2063	1348	1275	1396	1314	1692	1719								YJL193W	1571.8	1215.53	1658.46	1384.97	1307.97	1866.74	1849.18	1772.9								YJL193W	1209	1.209	1300.09	1005.4	1371.77	1145.55	1081.86	1544.04	1529.51	1466.42
YJL192C	5369	4453	5232	5616	5604	5101	6659	6104								YJL192C	5876.75	2623.73	6437.01	6100.37	5250.63	7246.77	7277.6	6295.38								YJL192C	705	0.705	8335.82	3721.61	9130.51	8653.01	7447.71	10279.1	10322.8	8929.62
YJL191W	15385	31665	21143	20744	16094	13961	20279	19030								YJL191W	16840	18657.2	26012.5	22533.1	15079.2	19833.8	22162.8	19626.7								YJL191W	417	0.417	40383.6	44741.5	62380.2	54036.3	36161.1	47563	53148.3	47066.3
YJL190C	52856	111980	37926	39284	54949	49256	61308	56015								YJL190C	57854.6	65979.3	46660.9	42672.2	51484.1	69975.8	67003.3	57771.2								YJL190C	393	0.393	147213	167886	118730	108581	131003	178056	170492	147001
YJL189W	21010	31935	18030	18452	22611	19595	21328	18746								YJL189W	22996.9	18816.3	22182.6	20043.4	21185.2	27837.8	23309.3	19333.7								YJL189W	156	0.156	147416	120617	142196	128484	135803	178447	149419	123934
YJL188C	13	11	3	5	7	7	6	4								YJL188C	14.2294	6.48126	3.69094	5.43124	6.55861	9.94459	6.55738	4.12541								YJL188C	309	0.309	46.0499	20.975	11.9448	17.5768	21.2253	32.1832	21.2213	13.3508
YJL187C	2520	1822	3851	4228	2428	2469	3687	3200								YJL187C	2758.32	1073.53	4737.94	4592.66	2274.9	3507.6	4029.51	3300.33								YJL187C	2460	2.46	1121.27	436.395	1925.99	1866.93	924.756	1425.85	1638.01	1341.6
YJL186W	6947	9464	8996	9055	7582	6943	9087	8323								YJL186W	7603.98	5576.24	11067.9	9835.98	7103.91	9863.62	9931.15	8583.95								YJL186W	1761	1.761	4317.99	3166.52	6285.02	5585.45	4034.02	5601.15	5639.49	4874.48
YJL185C	370	477	692	747	333	271	421	421								YJL185C	404.991	281.051	851.378	811.427	312.002	384.998	460.109	434.2								YJL185C	882	0.882	459.174	318.652	965.281	919.986	353.744	436.506	521.666	492.29
YJL184W	913	1682	1463	1421	916	823	1140	1153								YJL184W	999.343	991.044	1799.95	1543.56	858.24	1169.2	1245.9	1189.15								YJL184W	372	0.372	2686.41	2664.1	4838.58	4149.35	2307.1	3143.01	3349.2	3196.64
YJL183W	4817	7421	4715	4679	5084	4712	5962	5501								YJL183W	5272.55	4372.5	5800.94	5082.55	4763.42	6694.13	6515.85	5673.47								YJL183W	1269	1.269	4154.88	3445.62	4571.26	4005.17	3753.68	5275.12	5134.63	4470.82
YJL182C	1	0	1	1	0	0	1	0								YJL182C	1.09457	0	1.23031	1.08625	0	0	1.0929	0								YJL182C	318	0.318	3.44205	0	3.86891	3.41587	0	0	3.43678	0
YJL181W	1299	1255	2076	2017	1239	1162	1618	1492								YJL181W	1421.85	739.453	2554.13	2190.96	1160.87	1650.8	1768.31	1538.78								YJL181W	1836	1.836	774.427	402.752	1391.14	1193.33	632.284	899.13	963.13	838.115
YJL180C	781	922	1575	1502	666	761	1049	918								YJL180C	854.86	543.248	1937.75	1631.54	624.004	1081.12	1146.45	946.782								YJL180C	978	0.978	874.09	555.468	1981.34	1668.25	638.041	1105.44	1172.24	968.08
YJL179W	843	1722	1174	1112	882	779	1070	944								YJL179W	922.723	1014.61	1444.39	1207.91	826.384	1106.69	1169.4	973.597								YJL179W	330	0.33	2796.13	3074.58	4376.94	3660.33	2504.19	3353.61	3543.63	2950.3
YJL178C	1526	2262	1652	1616	1660	1413	1872	1754								YJL178C	1670.32	1332.78	2032.48	1755.38	1555.33	2007.39	2045.9	1808.99								YJL178C	816	0.816	2046.95	1633.31	2490.78	2151.2	1906.04	2460.03	2507.23	2216.9
YJL177W	57126	80438	45388	44610	58450	51096	71154	67740								YJL177W	62528.5	47394.5	55841.5	48457.5	54764.4	72589.9	77763.9	69863.9								YJL177W	555	0.555	112664	85395.6	100615	87310.9	98674.5	130793	140115	125881
YJL176C	3422	2372	5281	5959	3654	3318	5043	4520								YJL176C	3745.62	1397.6	6497.29	6472.95	3423.59	4713.74	5511.48	4661.72								YJL176C	2478	2.478	1511.55	564.002	2621.99	2612.17	1381.59	1902.23	2224.16	1881.24
YJL175W	2	0	2	0	0	0	4	2								YJL175W	2.18914	0	2.46063	0	0	0	4.37158	2.06271								YJL175W	513	0.513	4.26733	0	4.79655	0	0	0	8.52161	4.02087
YJL174W	7494	13619	13228	14384	7940	7479	11102	9718								YJL174W	8202.71	8024.39	16274.6	15624.6	7439.33	10625.1	12133.3	10022.7								YJL174W	831	0.831	9870.9	9656.31	19584.4	18802.2	8952.27	12785.9	14600.9	12061
YJL173C	1977	3287	2020	1914	1840	1665	1911	1715								YJL173C	2163.97	1936.72	2485.24	2079.08	1723.98	2365.39	2088.52	1768.77								YJL173C	369	0.369	5864.41	5248.56	6735.06	5634.36	4672.02	6410.28	5659.96	4793.42
YJL172W	16460	23139	29661	30632	20046	19296	26914	23381								YJL172W	18016.6	13633.6	36492.4	33274	18782	27413	29414.2	24114.1								YJL172W	1731	1.731	10408.2	7876.16	21081.7	19222.4	10850.4	15836.5	16992.6	13930.7
YJL171C	4031	5906	8536	8379	4568	4045	5531	4942								YJL171C	4412.22	3479.85	10502	9101.67	4279.96	5746.55	6044.81	5096.95								YJL171C	1191	1.191	3704.63	2921.79	8817.77	7642.04	3593.58	4824.98	5075.41	4279.55
YJL170C	159	168	189	171	113	135	152	141								YJL170C	174.037	98.9866	232.53	185.748	105.875	191.789	166.12	145.421								YJL170C	630	0.63	276.249	157.122	369.094	294.839	168.055	304.426	263.683	230.827
YJL169W	11	14	3	5	6	5	9	6								YJL169W	12.0403	8.24888	3.69094	5.43124	5.62166	7.10328	9.83607	6.18812								YJL169W	369	0.369	32.6295	22.3547	10.0026	14.7188	15.2349	19.2501	26.656	16.77
YJL168C	1474	1631	2708	2931	1787	1670	2458	2274								YJL168C	1613.4	960.995	3331.69	3183.79	1674.32	2372.5	2686.34	2345.3								YJL168C	2202	2.202	732.696	436.419	1513.03	1445.86	760.363	1077.43	1219.95	1065.08
YJL167W	23472	36251	32835	32472	24626	21510	28758	27894								YJL167W	25691.8	21359.3	40397.4	35272.6	23073.2	30558.3	31429.5	28768.6								YJL167W	1059	1.059	24260.4	20169.3	38146.7	33307.5	21787.7	28855.8	29678.5	27165.8
YJL166W	6885	11449	13635	13821	5433	4776	7411	6164								YJL166W	7536.12	6745.82	16775.3	15013	5090.42	6785.05	8099.45	6357.26								YJL166W	285	0.285	26442.5	23669.5	58860.9	52677.3	17861.1	23807.2	28419.1	22306.2
YJL165C	2245	1509	4507	4833	2436	2367	3562	3121								YJL165C	2457.31	889.111	5545.03	5249.84	2282.39	3362.69	3892.9	3218.85								YJL165C	2568	2.568	956.897	346.227	2159.28	2044.33	888.783	1309.46	1515.93	1253.45
YJL164C	1126	998	2288	2122	925	799	1484	1278								YJL164C	1232.49	588.027	2814.96	2305.02	866.673	1135.1	1621.86	1318.07								YJL164C	1194	1.194	1032.23	492.485	2357.59	1930.5	725.857	950.674	1358.34	1103.91
YJL163C	370	451	595	580	338	265	425	367								YJL163C	404.991	265.732	732.037	630.024	316.687	376.474	464.481	378.507								YJL163C	1668	1.668	242.801	159.312	438.871	377.712	189.86	225.704	278.466	226.922
YJL162C	306	485	583	622	302	387	598	518								YJL162C	334.939	285.765	717.274	675.646	282.957	549.794	653.552	534.241								YJL162C	1752	1.752	191.175	163.108	409.403	385.643	161.505	313.809	373.032	304.932
YJL161W	75	97	882	829	79	51	115	96								YJL161W	82.0928	57.153	1085.14	900.5	74.0186	72.4535	125.683	99.0099								YJL161W	543	0.543	151.184	105.254	1998.41	1658.38	136.314	133.432	231.461	182.339
YJL160C	56	53	69	48	46	35	32	37								YJL160C	61.296	31.2279	84.8917	52.1399	43.0994	49.723	34.9727	38.1601								YJL160C	864	0.864	70.9444	36.1434	98.2543	60.3471	49.8836	57.5497	40.4776	44.1667
YJL159W	181115	230296	540490	600184	170381	172407	259289	231708								YJL159W	198243	135692	664973	651949	159637	244931	283376	238973								YJL159W	1242	1.242	159616	109253	535405	524918	128533	197207	228161	192410
YJL158C	61080	81311	115505	127607	63993	62959	87325	77079								YJL158C	66856.4	47908.9	142108	138613	59957.8	89443.1	95437.2	79495.7								YJL158C	684	0.684	97743.3	70042.3	207760	202650	87657.7	130765	139528	116222
YJL157C	5050	6013	12630	12866	5887	5572	8883	8274								YJL157C	5527.58	3542.89	15538.9	13975.7	5515.79	7915.9	9708.2	8533.42								YJL157C	2493	2.493	2217.24	1421.14	6233	5605.96	2212.51	3175.25	3894.18	3422.95
YJL156W-A	12	11	16	20	15	7	5	13								YJL156W-A	13.1349	6.48126	19.685	21.725	14.0542	9.94459	5.46448	13.4076								YJL156W-A	222	0.222	59.166	29.1949	88.6713	97.8602	63.307	44.7955	24.6148	60.3946
YJL156C	1833	2888	3109	3395	1783	1680	2532	2350								YJL156C	2006.35	1701.63	3825.05	3687.81	1670.57	2386.7	2767.21	2423.68								YJL156C	2100	2.1	955.404	810.298	1821.45	1756.1	795.51	1136.53	1317.72	1154.13
YJL155C	865	1093	3824	3981	921	830	1377	1182								YJL155C	946.804	644.002	4704.72	4324.35	862.925	1179.14	1504.92	1219.06								YJL155C	1359	1.359	696.692	473.879	3461.9	3182.01	634.971	867.656	1107.37	897.027
YJL154C	6624	6278	8671	9135	7350	6420	10174	8884								YJL154C	7250.44	3699.03	10668.1	9922.88	6886.54	9120.61	11119.1	9162.54								YJL154C	2835	2.835	2557.47	1304.77	3762.98	3500.13	2429.11	3217.15	3922.09	3231.94
YJL153C	214	251	3083	3455	233	206	275	266								YJL153C	234.238	147.891	3793.06	3752.99	218.308	292.655	300.546	274.34								YJL153C	1602	1.602	146.216	92.3163	2367.7	2342.69	136.272	182.681	187.607	171.248
YJL152W	11	10	10	11	3	2	7	12								YJL152W	12.0403	5.89206	12.3031	11.9487	2.81083	2.84131	7.65027	12.3762								YJL152W	360	0.36	33.4452	16.3668	34.1754	33.1909	7.80786	7.89254	21.2508	34.3784
YJL151C	3272	4873	6726	6602	2952	2730	3338	3136								YJL151C	3581.44	2871.2	8275.1	7171.41	2765.86	3878.39	3648.09	3234.32								YJL151C	402	0.402	8909.04	7142.29	20584.8	17839.3	6880.24	9647.74	9074.84	8045.58
YJL150W	25	14	12	11	8	7	15	7								YJL150W	27.3643	8.24888	14.7638	11.9487	7.49555	9.94459	16.3934	7.21947								YJL150W	303	0.303	90.3111	27.224	48.7253	39.4347	24.7378	32.8204	54.1038	23.8266
YJL149W	1877	1822	4084	4304	1867	1768	2684	2395								YJL149W	2054.51	1073.53	5024.61	4675.21	1749.27	2511.72	2933.33	2470.09								YJL149W	1992	1.992	1031.38	538.922	2522.39	2346.99	878.15	1260.9	1472.56	1240.01
YJL148W	2017	5000	2676	3042	2476	2342	3112	3293								YJL148W	2207.75	2946.03	3292.32	3304.37	2319.87	3327.18	3401.09	3396.25								YJL148W	702	0.702	3144.94	4196.62	4689.92	4707.08	3304.66	4739.57	4844.86	4837.96
YJL147C	533	542	939	857	435	416	665	602								YJL147C	583.406	319.35	1155.27	930.915	407.571	590.993	726.776	620.875								YJL147C	1149	1.149	507.751	277.937	1005.45	810.195	354.718	514.354	632.529	540.361
YJL146W	1012	780	2014	1975	964	856	1264	1165								YJL146W	1107.71	459.58	2477.85	2145.34	903.214	1216.08	1381.42	1201.53								YJL146W	1410	1.41	785.607	325.944	1757.34	1521.52	640.577	862.469	979.731	852.146
YJL145W	3029	4431	3179	3247	3195	3088	3725	3550								YJL145W	3315.46	2610.77	3911.17	3527.05	2993.54	4386.99	4071.04	3661.3								YJL145W	885	0.885	3746.28	2950.02	4419.4	3985.36	3382.53	4957.05	4600.04	4137.07
YJL144W	68	67	381	383	83	60	122	118								YJL144W	74.4308	39.4768	468.75	416.033	77.7663	85.2394	133.333	121.7								YJL144W	315	0.315	236.288	125.323	1488.1	1320.74	246.877	270.601	423.28	386.348
YJL143W	2983	3630	4087	4303	2951	2840	3509	3165								YJL143W	3265.11	2138.82	5028.3	4674.13	2764.92	4034.66	3834.97	3264.23								YJL143W	477	0.477	6845.08	4483.89	10541.5	9799.01	5796.48	8458.42	8039.78	6843.26
YJL142C	15	6	30	42	19	16	19	20								YJL142C	16.4186	3.53523	36.9094	45.6224	17.8019	22.7305	20.765	20.6271								YJL142C	393	0.393	41.7775	8.99551	93.9172	116.088	45.2975	57.8384	52.8372	52.4862
YJL141C	2769	1671	9622	9556	2787	2630	4403	3742								YJL141C	3030.87	984.563	11838.1	10380.2	2611.26	3736.33	4812.02	3859.32								YJL141C	2424	2.424	1250.36	406.173	4883.7	4282.26	1077.25	1541.39	1985.16	1592.13
YJL140W	720	1144	1142	1034	670	734	939	853								YJL140W	788.091	674.051	1405.02	1123.18	627.752	1042.76	1026.23	879.744								YJL140W	666	0.666	1183.32	1012.09	2109.64	1686.46	942.571	1565.71	1540.89	1320.94
YJL139C	795	775	733	766	824	774	1004	920								YJL139C	870.184	456.634	901.821	832.066	772.042	1099.59	1097.27	948.845								YJL139C	1287	1.287	676.134	354.805	700.716	646.516	599.877	854.381	852.578	737.253
YJL138C	78158	105505	73273	75893	86552	79014	103084	96708								YJL138C	85549.5	62164.2	90148.9	82438.6	81094.4	112252	112660	99740.1								YJL138C	1188	1.188	72011.3	52326.7	75882.9	69392.8	68261.2	94488	94831.7	83956.3
YJL137C	1231	1108	1656	1691	1066	966	1367	1211								YJL137C	1347.42	652.84	2037.4	1836.85	998.782	1372.35	1493.99	1248.97								YJL137C	1143	1.143	1178.84	571.164	1782.5	1607.04	873.825	1200.66	1307.08	1092.71
YJL136W-A	1	1	0	1	1	1	3	2								YJL136W-A	1.09457	0.589206	0	1.08625	0.936944	1.42066	3.27869	2.06271								YJL136W-A	84	0.084	13.0306	7.01435	0	12.9315	11.1541	16.9126	39.032	24.556
YJL136C	37668	62826	33613	32206	38999	35552	40150	34171								YJL136C	41230.3	37017.4	41354.6	34983.7	36539.9	50507.2	43879.8	35242.4								YJL136C	264	0.264	156175	140218	156646	132514	138409	191315	166211	133494
YJL135W	6	7	9	15	10	4	13	8								YJL135W	6.56743	4.12444	11.0728	16.2937	9.36944	5.68263	14.2077	8.25083								YJL135W	318	0.318	20.6523	12.9699	34.8202	51.2381	29.4636	17.8699	44.6781	25.946
YJL134W	1803	2216	2010	1957	2005	1864	2235	2130								YJL134W	1973.51	1305.68	2472.93	2125.79	1878.57	2648.1	2442.62	2196.78								YJL134W	1230	1.23	1604.48	1061.53	2010.51	1728.28	1527.29	2152.93	1985.87	1786
YJL133C-A	535	601	2030	1943	548	502	775	526								YJL133C-A	585.595	354.113	2497.54	2110.58	513.445	713.169	846.995	542.492								YJL133C-A	225	0.225	2602.65	1573.83	11100.2	9380.36	2281.98	3169.64	3764.42	2411.07
YJL133W	2823	2726	3317	3398	2935	2683	3433	3337								YJL133W	3089.97	1606.17	4080.95	3691.07	2749.93	3811.62	3751.91	3441.63								YJL133W	945	0.945	3269.81	1699.66	4318.47	3905.9	2909.98	4033.46	3970.28	3641.93
YJL132W	604	675	1570	1519	588	500	793	670								YJL132W	661.121	397.714	1931.59	1650.01	550.923	710.328	866.667	691.007								YJL132W	2253	2.253	293.44	176.526	857.343	732.362	244.529	315.281	384.672	306.705
YJL131C	225	276	383	393	195	188	317	240								YJL131C	246.278	162.621	471.211	426.896	182.704	267.083	346.448	247.525								YJL131C	1071	1.071	229.952	151.84	439.973	398.595	170.592	249.378	323.481	231.116
YJL130C	61835	55973	53144	58835	79476	79349	90450	81608								YJL130C	67682.8	32979.6	65383.9	63909.4	74464.5	112728	98852.5	84166.7								YJL130C	6645	6.645	10185.5	4963.07	9839.56	9617.67	11206.1	16964.3	14876.2	12666.2
YJL129C	3392	2497	5755	6049	4000	3982	5714	5124								YJL129C	3712.78	1471.25	7080.46	6570.71	3747.77	5657.05	6244.81	5284.65								YJL129C	3708	3.708	1001.29	396.776	1909.51	1772.04	1010.73	1525.63	1684.14	1425.2
YJL128C	6034	4346	9321	10057	5746	5420	8010	7288								YJL128C	6604.64	2560.69	11467.8	10924.4	5383.68	7699.96	8754.1	7516.5								YJL128C	2007	2.007	3290.8	1275.88	5713.88	5443.15	2682.45	3836.55	4361.78	3745.14
YJL127W-A	0	0	2	0	0	0	0	0								YJL127W-A	0	0	2.46063	0	0	0	0	0								YJL127W-A	117	0.117	0	0	21.031	0	0	0	0	0
YJL127C-B	842	1536	1060	1092	731	735	932	878								YJL127C-B	921.629	905.02	1304.13	1186.18	684.906	1044.18	1018.58	905.528								YJL127C-B	159	0.159	5796.41	5691.95	8202.1	7460.27	4307.58	6567.18	6406.16	5695.14
YJL127C	1255	644	1529	1710	1277	1275	1778	1464								YJL127C	1373.69	379.449	1881.15	1857.48	1196.48	1811.34	1943.17	1509.9								YJL127C	1923	1.923	714.346	197.321	978.238	965.93	622.193	941.933	1010.49	785.18
YJL126W	622	1032	874	796	717	637	867	756								YJL126W	680.823	608.06	1075.3	864.653	671.789	904.958	947.541	779.703								YJL126W	924	0.924	736.822	658.074	1163.74	935.772	727.044	979.392	1025.48	843.834
YJL125C	2142	3171	2887	3347	2444	2340	2956	2679								YJL125C	2344.57	1868.37	3551.92	3635.67	2289.89	3324.34	3230.6	2763								YJL125C	1152	1.152	2035.22	1621.85	3083.26	3155.97	1987.75	2885.71	2804.34	2398.43
YJL124C	2598	3271	3960	3973	2759	2458	3638	3504								YJL124C	2843.7	1927.29	4872.05	4315.66	2585.03	3491.97	3975.96	3613.86								YJL124C	519	0.519	5479.18	3713.47	9387.37	8315.34	4980.79	6728.27	7660.8	6963.12
YJL123C	2825	3185	4978	5587	3297	3092	4552	4059								YJL123C	3092.16	1876.62	6124.51	6068.87	3089.1	4392.67	4974.86	4186.26								YJL123C	1437	1.437	2151.82	1305.93	4262.01	4223.29	2149.69	3056.83	3461.98	2913.2
YJL122W	1349	2152	1760	1758	1564	1664	1836	1814								YJL122W	1476.58	1267.97	2165.35	1909.62	1465.38	2363.97	2006.56	1870.87								YJL122W	528	0.528	2796.55	2401.46	4101.05	3616.71	2775.34	4477.22	3800.3	3543.32
YJL121C	10844	16451	8859	8592	9471	8562	11247	10912								YJL121C	11869.5	9693.02	10899.4	9333.04	8873.79	12163.7	12291.8	11254.1								YJL121C	717	0.717	16554.4	13518.9	15201.3	13016.8	12376.3	16964.7	17143.4	15696.1
YJL120W	9	5	7	9	3	5	7	7								YJL120W	9.85114	2.94603	8.6122	9.77623	2.81083	7.10328	7.65027	7.21947								YJL120W	324	0.324	30.4047	9.09268	26.5809	30.1736	8.6754	21.9237	23.612	22.2823
YJL119C	108	91	75	110	80	78	77	86								YJL119C	118.214	53.6177	92.2736	119.487	74.9555	110.811	84.153	88.6964								YJL119C	324	0.324	364.857	165.487	284.795	368.788	231.344	342.01	259.731	273.754
YJL118W	882	1040	1200	1309	682	811	1094	927								YJL118W	965.412	612.774	1476.38	1421.9	638.996	1152.15	1195.63	956.064								YJL118W	660	0.66	1462.74	928.445	2236.94	2154.39	968.175	1745.69	1811.56	1448.58
YJL117W	6649	6049	8076	7978	7943	7018	9686	9221								YJL117W	7277.8	3564.11	9936.02	8666.09	7442.14	9970.17	10585.8	9510.11								YJL117W	936	0.936	7775.43	3807.81	10615.4	9258.64	7951.01	10651.9	11309.6	10160.4
YJL116C	133	167	155	185	82	85	101	80								YJL116C	145.578	98.3974	190.699	200.956	76.8294	120.756	110.383	82.5083								YJL116C	1014	1.014	143.568	97.0388	188.066	198.181	75.7686	119.089	108.858	81.3691
YJL115W	1397	1116	1921	2161	1224	1195	1693	1596								YJL115W	1529.12	657.554	2363.44	2347.38	1146.82	1697.68	1850.27	1646.04								YJL115W	840	0.84	1820.38	782.802	2813.61	2794.5	1365.26	2021.05	2202.71	1959.57
YJL114W	8	30	18	23	15	6	21	15								YJL114W	8.75657	17.6762	22.1457	24.9837	14.0542	8.52394	22.9508	15.4703								YJL114W	681	0.681	12.8584	25.9562	32.5193	36.6868	20.6375	12.5168	33.7016	22.717
YJL113W	69	133	142	193	84	79	149	104								YJL113W	75.5254	78.3644	174.705	209.646	78.7033	112.232	162.842	107.261								YJL113W	4647	4.647	16.2525	16.8634	37.5952	45.1142	16.9364	24.1515	35.0423	23.0817
YJL112W	2005	1624	2889	2806	1873	1858	2781	2461								YJL112W	2194.61	956.87	3554.38	3048.01	1754.9	2639.58	3039.34	2538.16								YJL112W	2145	2.145	1023.13	446.093	1657.05	1420.98	818.133	1230.57	1416.94	1183.29
YJL111W	8111	6281	9707	10393	9412	8683	11311	10458								YJL111W	8878.06	3700.8	11942.7	11289.4	8818.51	12335.6	12361.7	10785.9								YJL111W	1653	1.653	5370.88	2238.84	7224.84	6829.63	5334.85	7462.53	7478.37	6525.04
YJL110C	939	559	1322	1496	1181	1063	1485	1400								YJL110C	1027.8	329.366	1626.48	1625.03	1106.53	1510.16	1622.95	1443.89								YJL110C	1656	1.656	620.653	198.893	982.172	981.297	668.195	911.931	980.043	871.917
YJL109C	21628	21316	27506	30309	26180	27246	33936	32777								YJL109C	23673.4	12559.5	33841	32923.1	24529.2	38707.2	37088.5	33804.7								YJL109C	5310	5.31	4458.26	2365.26	6373.08	6200.21	4619.43	7289.49	6984.66	6366.23
YJL108C	677	546	1286	1330	678	769	1099	958								YJL108C	741.025	321.706	1582.19	1444.71	635.248	1092.48	1201.09	988.036								YJL108C	1152	1.152	643.25	279.259	1373.42	1254.09	551.43	948.337	1042.62	857.67
YJL107C	302	198	548	603	312	293	402	311								YJL107C	330.56	116.663	674.213	655.008	292.326	416.252	439.344	320.751								YJL107C	1164	1.164	283.987	100.226	579.22	562.721	251.14	357.605	377.444	275.559
YJL106W	119	83	505	601	147	125	206	172								YJL106W	130.254	48.9041	621.309	652.835	137.731	177.582	225.137	177.393								YJL106W	1938	1.938	67.2105	25.2343	320.593	336.86	71.0685	91.6316	116.17	91.5339
YJL105W	33	21	76	84	25	29	59	24								YJL105W	36.1208	12.3733	93.5039	91.2448	23.4236	41.199	64.4809	24.7525								YJL105W	1683	1.683	21.4622	7.35194	55.5579	54.2156	13.9178	24.4795	38.3131	14.7074
YJL104W	674	1005	1001	1035	609	599	808	716								YJL104W	737.741	592.152	1231.55	1124.27	570.599	850.973	883.06	738.449								YJL104W	450	0.45	1639.42	1315.89	2736.77	2498.37	1268	1891.05	1962.36	1641
YJL103C	607	581	1231	1222	511	432	892	706								YJL103C	664.405	342.329	1514.52	1327.4	478.778	613.724	974.863	728.135								YJL103C	1857	1.857	357.784	184.345	815.572	714.806	257.823	330.492	524.967	392.103
YJL102W	1319	977	1798	1760	1300	1224	2009	1590								YJL102W	1443.74	575.654	2212.11	1911.8	1218.03	1738.88	2195.63	1639.85								YJL102W	2460	2.46	586.886	234.006	899.23	777.153	495.133	706.863	892.532	666.606
YJL101C	3951	3458	4686	4254	4177	3978	5905	5021								YJL101C	4324.65	2037.47	5765.26	4620.9	3913.61	5651.37	6453.55	5178.42								YJL101C	2037	2.037	2123.05	1000.23	2830.27	2268.48	1921.26	2774.36	3168.16	2542.18
YJL100W	1677	1227	2159	1962	1500	1395	1962	1943								YJL100W	1835.6	722.955	2656.25	2131.22	1405.42	1981.82	2144.26	2003.92								YJL100W	1824	1.824	1006.36	396.357	1456.28	1168.43	770.513	1086.52	1175.58	1098.64
YJL099W	1538	1500	4173	4423	1674	1614	2392	2224								YJL099W	1683.45	883.809	5134.1	4804.48	1568.44	2292.94	2614.21	2293.73								YJL099W	2241	2.241	751.205	394.381	2290.99	2143.9	699.886	1023.18	1166.54	1023.53
YJL098W	2368	2086	3722	4494	2882	2988	4163	3849								YJL098W	2591.94	1229.08	4579.23	4881.6	2700.27	4244.92	4549.73	3969.68								YJL098W	3177	3.177	815.846	386.869	1441.37	1536.54	849.944	1336.14	1432.08	1249.51
YJL097W	4711	6909	5902	5817	4688	4227	5507	5189								YJL097W	5156.52	4070.82	7261.32	6318.71	4392.39	6005.11	6018.58	5351.69								YJL097W	654	0.654	7884.59	6224.5	11102.9	9661.63	6716.2	9182.13	9202.72	8183.01
YJL096W	1441	2487	2349	2392	1388	1263	1828	1546								YJL096W	1577.28	1465.35	2890.01	2598.31	1300.48	1794.29	1997.81	1594.47								YJL096W	486	0.486	3245.43	3015.13	5946.52	5346.31	2675.88	3691.95	4110.73	3280.81
YJL095W	2676	1301	3446	3556	2588	3123	4083	3584								YJL095W	2929.07	766.557	4239.67	3862.7	2424.81	4436.71	4462.3	3696.37								YJL095W	4437	4.437	660.147	172.765	955.525	870.565	546.498	999.935	1005.7	833.079
YJL094C	2269	2476	3755	3691	2362	2190	3319	2863								YJL094C	2483.58	1458.87	4619.83	4009.34	2213.06	3111.24	3627.32	2952.76								YJL094C	2622	2.622	947.209	556.397	1761.95	1529.12	844.035	1186.59	1383.42	1126.15
YJL093C	2241	1911	3016	3081	2212	2182	3070	2662								YJL093C	2452.93	1125.97	3710.63	3346.73	2072.52	3099.87	3355.19	2745.46								YJL093C	2076	2.076	1181.57	542.376	1787.39	1612.11	998.323	1493.19	1616.18	1322.48
YJL092W	2608	1866	4672	4920	2688	2764	4219	3731								YJL092W	2854.64	1099.46	5748.03	5344.34	2518.5	3926.69	4610.93	3847.98								YJL092W	3525	3.525	809.827	311.903	1630.65	1516.13	714.469	1113.96	1308.06	1091.63
YJL090C	1102	1235	2049	2228	1327	1223	2020	1673								YJL090C	1206.22	727.669	2520.92	2420.16	1243.32	1737.46	2207.65	1725.45								YJL090C	2295	2.295	525.585	317.067	1098.44	1054.54	541.753	757.064	961.939	751.832
YJL089W	59	96	225	290	102	102	139	118								YJL089W	64.5797	56.5638	276.821	315.012	95.5683	144.907	151.913	121.7								YJL089W	2490	2.49	25.9356	22.7164	111.173	126.511	38.3808	58.1956	61.0091	48.8754
YJL088W	1021	1019	1405	1314	2399	2260	1486	1291								YJL088W	1117.56	600.401	1728.59	1427.33	2247.73	3210.68	1624.04	1331.48								YJL088W	1017	1.017	1098.88	590.364	1699.7	1403.47	2210.16	3157.01	1596.9	1309.22
YJL087C	1037	1397	1702	1933	1374	1287	1856	1683								YJL087C	1135.07	823.12	2094	2099.72	1287.36	1828.38	2028.42	1735.77								YJL087C	2484	2.484	456.953	331.369	842.994	845.297	518.261	736.065	816.592	698.779
YJL086C	5	4	3	12	3	2	1	1								YJL086C	5.47285	2.35682	3.69094	13.035	2.81083	2.84131	1.0929	1.03135								YJL086C	369	0.369	14.8316	6.38705	10.0026	35.3251	7.61743	7.70003	2.96178	2.79499
YJL085W	1244	2436	2460	2690	1443	1353	2148	1791								YJL085W	1361.65	1435.31	3026.57	2922.01	1352.01	1922.15	2347.54	1847.15								YJL085W	1872	1.872	727.375	766.723	1616.76	1560.9	722.227	1026.79	1254.03	986.727
YJL084C	3214	2157	8380	8648	3279	3259	5186	4638								YJL084C	3517.95	1270.92	10310	9393.87	3072.24	4629.92	5667.76	4783.42								YJL084C	3141	3.141	1120.01	404.622	3282.41	2990.73	978.108	1474.03	1804.44	1522.9
YJL083W	1406	872	2123	2272	1210	1296	1804	1625								YJL083W	1538.97	513.787	2611.96	2467.96	1133.7	1841.17	1971.58	1675.95								YJL083W	1815	1.815	847.916	283.078	1439.1	1359.76	624.629	1014.42	1086.27	923.388
YJL082W	3623	2937	9358	9670	3906	3421	5301	4573								YJL082W	3965.63	1730.5	11513.3	10504	3659.7	4860.07	5793.44	4716.38								YJL082W	2196	2.196	1805.84	788.022	5242.84	4783.25	1666.53	2213.14	2638.18	2147.71
YJL081C	2524	2172	2697	2697	2714	2551	3534	3154								YJL081C	2762.7	1279.75	3318.16	2929.61	2542.87	3624.09	3862.3	3252.89								YJL081C	1470	1.47	1879.39	870.582	2257.25	1992.93	1729.84	2465.37	2627.41	2212.85
YJL080C	45195	34795	32233	36235	49669	49237	60427	54964								YJL080C	49469.1	20501.4	39656.7	39360.2	46537.1	69948.9	66040.4	56687.3								YJL080C	3669	3.669	13483	5587.74	10808.6	10727.8	12683.9	19064.8	17999.6	15450.3
YJL079C	4351	6681	9128	8858	2834	2649	4586	4231								YJL079C	4762.48	3936.48	11230.3	9621.99	2655.3	3763.32	5012.02	4363.66								YJL079C	900	0.9	5291.64	4373.87	12478.1	10691.1	2950.33	4181.47	5568.91	4848.51
YJL078C	17006	18146	19952	22145	16604	17051	22818	21107								YJL078C	18614.3	10691.7	24547.2	24055	15557	24223.6	24937.7	21768.8								YJL078C	2646	2.646	7034.87	4040.71	9277.11	9091.07	5879.45	9154.8	9424.68	8227.05
YJL077W-B	82	113	147	140	94	87	122	105								YJL077W-B	89.7548	66.5802	180.856	152.075	88.0727	123.597	133.333	108.292								YJL077W-B	99	0.099	906.614	672.528	1826.83	1536.11	889.623	1248.46	1346.8	1093.86
YJL077C	5	10	12	12	9	9	11	8								YJL077C	5.47285	5.89206	14.7638	13.035	8.43249	12.7859	12.0219	8.25083								YJL077C	396	0.396	13.8203	14.8789	37.2823	32.9166	21.2942	32.2876	30.3582	20.8354
YJL077W-A	134	227	161	134	99	145	178	174								YJL077W-A	146.673	133.75	198.081	145.557	92.7574	205.995	194.536	179.455								YJL077W-A	87	0.087	1685.89	1537.35	2276.79	1673.07	1066.18	2367.76	2236.04	2062.71
YJL076W	13923	8425	15390	16976	15382	15518	20940	18669								YJL076W	15239.7	4964.06	18934.5	18440.1	14412.1	22045.7	22885.2	19254.3								YJL076W	3570	3.57	4268.83	1390.49	5303.79	5165.31	4036.99	6175.28	6410.43	5393.37
YJL075C	0	1	0	0	0	0	1	0								YJL075C	0	0.589206	0	0	0	0	1.0929	0								YJL075C	417	0.417	0	1.41296	0	0	0	0	2.62085	0
YJL074C	1166	2348	2585	3201	1617	1385	2440	1984								YJL074C	1276.27	1383.46	3180.36	3477.08	1515.04	1967.61	2666.67	2046.2								YJL074C	3693	3.693	345.592	374.616	861.187	941.533	410.246	532.794	722.087	554.077
YJL073W	2998	2204	4210	4639	3059	2897	4192	3666								YJL073W	3281.52	1298.61	5179.63	5039.1	2866.11	4115.64	4581.42	3780.94								YJL073W	1938	1.938	1693.25	670.077	2672.67	2600.16	1478.9	2123.65	2363.99	1950.95
YJL072C	997	1218	1281	1253	958	910	1226	1174								YJL072C	1091.29	717.653	1576.03	1361.07	897.592	1292.8	1339.89	1210.81								YJL072C	642	0.642	1699.82	1117.84	2454.88	2120.04	1398.12	2013.7	2087.06	1885.99
YJL071W	1351	1674	1417	1276	1560	1531	1778	1627								YJL071W	1478.77	986.33	1743.36	1386.05	1461.63	2175.02	1943.17	1678.01								YJL071W	1725	1.725	857.255	571.786	1010.64	803.509	847.323	1260.88	1126.48	972.76
YJL070C	748	910	1726	1835	710	725	1193	1058								YJL070C	818.739	536.177	2123.52	1993.27	665.23	1029.98	1303.83	1091.17								YJL070C	2667	2.667	306.989	201.041	796.222	747.381	249.43	386.193	488.873	409.138
YJL069C	4760	3500	5632	6422	5159	5401	6387	6328								YJL069C	5210.16	2062.22	6929.13	6975.89	4833.69	7672.96	6980.33	6526.4								YJL069C	1785	1.785	2918.86	1155.31	3881.87	3908.06	2707.95	4298.58	3910.55	3656.25
YJL068C	2806	4031	4740	4644	2459	2087	3010	2841								YJL068C	3071.37	2375.09	5831.69	5044.54	2303.94	2964.91	3289.62	2930.07								YJL068C	900	0.9	3412.63	2638.99	6479.66	5605.04	2559.94	3294.34	3655.13	3255.64
YJL067W	2	18	7	3	2	5	9	5								YJL067W	2.18914	10.6057	8.6122	3.25874	1.87389	7.10328	9.83607	5.15677								YJL067W	351	0.351	6.23687	30.2157	24.5362	9.28417	5.33871	20.2373	28.023	14.6916
YJL066C	1380	1133	2838	2989	1105	1003	1664	1518								YJL066C	1510.51	667.57	3491.63	3246.8	1035.32	1424.92	1818.58	1565.59								YJL066C	759	0.759	1990.13	879.539	4600.31	4277.73	1364.06	1877.36	2396.02	2062.71
YJL065C	1906	1963	3081	3159	1831	1572	2315	2253								YJL065C	2086.25	1156.61	3790.6	3431.46	1715.54	2233.27	2530.05	2323.64								YJL065C	504	0.504	4139.39	2294.86	7521.03	6808.45	3403.86	4431.09	5019.95	4610.39
YJL064W	4	5	0	1	0	0	0	1								YJL064W	4.37828	2.94603	0	1.08625	0	0	0	1.03135								YJL064W	396	0.396	11.0563	7.43947	0	2.74305	0	0	0	2.60443
YJL063C	2299	2782	2964	3024	1794	1820	2575	2344								YJL063C	2516.42	1639.17	3646.65	3284.81	1680.88	2585.59	2814.21	2417.49								YJL063C	717	0.717	3509.65	2286.15	5085.99	4581.33	2344.32	3606.13	3924.98	3371.68
YJL062W-A	1859	3092	2489	2442	1471	1433	1827	1716								YJL062W-A	2034.81	1821.82	3062.25	2652.62	1378.24	2035.8	1996.72	1769.8								YJL062W-A	258	0.258	7886.85	7061.33	11869.2	10281.5	5342.03	7890.7	7739.23	6859.7
YJL062W	4243	4751	4325	4284	4096	4130	5574	5237								YJL062W	4644.26	2799.32	5321.11	4653.49	3837.72	5867.31	6091.8	5401.2								YJL062W	2493	2.493	1862.92	1122.87	2134.42	1866.62	1539.4	2353.51	2443.56	2166.54
YJL061W	2163	3769	4235	4670	2556	2522	4041	3514								YJL061W	2367.56	2220.72	5210.38	5072.78	2394.83	3582.9	4416.39	3624.17								YJL061W	2142	2.142	1105.3	1036.75	2432.49	2368.24	1118.03	1672.69	2061.81	1691.96
YJL060W	3573	3449	5305	5406	3656	3105	4546	3871								YJL060W	3910.9	2032.17	6526.82	5872.26	3425.47	4411.14	4968.31	3992.37								YJL060W	1335	1.335	2929.51	1522.23	4889	4398.69	2565.89	3304.22	3721.58	2990.54
YJL059W	1026	1079	1406	1451	1010	901	1239	1052								YJL059W	1123.03	635.753	1729.82	1576.15	946.313	1280.01	1354.1	1084.98								YJL059W	1227	1.227	915.265	518.136	1409.8	1284.55	771.241	1043.2	1103.58	884.257
YJL058C	616	706	855	928	711	648	868	806								YJL058C	674.256	415.979	1051.92	1008.04	666.167	920.585	948.634	831.271								YJL058C	1632	1.632	413.147	254.889	644.558	617.67	408.191	564.084	581.271	509.357
YJL057C	698	689	2217	2122	646	566	917	810								YJL057C	764.011	405.963	2727.61	2305.02	605.266	804.091	1002.19	835.396								YJL057C	2004	2.004	381.243	202.576	1361.08	1150.21	302.029	401.243	500.093	416.864
YJL056C	2461	1452	3192	3492	2505	2555	3469	3303								YJL056C	2693.74	855.527	3927.17	3793.18	2347.04	3629.78	3791.26	3406.56								YJL056C	2643	2.643	1019.2	323.695	1485.87	1435.18	888.023	1373.35	1434.45	1288.9
YJL055W	1461	1308	2410	2396	1339	1226	1824	1719								YJL055W	1599.17	770.681	2965.06	2602.65	1254.57	1741.72	1993.44	1772.9								YJL055W	738	0.738	2166.89	1044.28	4017.7	3526.63	1699.96	2360.06	2701.14	2402.3
YJL054W	3265	2951	3853	4208	3276	3024	4138	3748								YJL054W	3573.77	1738.75	4740.4	4570.93	3069.43	4296.06	4522.4	3865.51								YJL054W	1437	1.437	2486.97	1209.98	3298.82	3180.89	2136	2989.61	3147.12	2689.99
YJL053W	1451	2147	2677	2851	1677	1394	2295	2039								YJL053W	1588.22	1265.02	3293.55	3096.89	1571.25	1980.39	2508.2	2102.93								YJL053W	1140	1.14	1393.18	1109.67	2889.08	2716.57	1378.29	1737.19	2200.17	1844.67
YJL052C-A	0	1	0	0	2	0	0	1								YJL052C-A	0	0.589206	0	0	1.87389	0	0	1.03135								YJL052C-A	120	0.12	0	4.91005	0	0	15.6157	0	0	8.59461
YJL052W	3794	4983	18758	17546	3942	3854	4916	4043								YJL052W	4152.8	2936.01	23078.2	19059.3	3693.43	5475.21	5372.68	4169.76								YJL052W	999	0.999	4156.96	2938.95	23101.3	19078.4	3697.13	5480.69	5378.06	4173.93
YJL051W	3094	2270	5918	6239	3082	3255	4881	4188								YJL051W	3386.6	1337.5	7281	6777.1	2887.66	4624.24	5334.43	4319.31								YJL051W	2469	2.469	1371.65	541.716	2948.97	2744.88	1169.57	1872.92	2160.56	1749.42
YJL050W	6175	4660	6207	6926	8459	7949	9680	9339								YJL050W	6758.98	2745.7	7636.56	7523.35	7925.61	11292.8	10579.2	9631.81								YJL050W	3222	3.222	2097.76	852.172	2370.13	2335	2459.84	3504.9	3283.44	2989.39
YJL049W	116	331	347	428	181	146	231	191								YJL049W	126.97	195.027	426.919	464.914	169.587	207.416	252.459	196.988								YJL049W	1353	1.353	93.8435	144.144	315.535	343.617	125.341	153.301	186.592	145.594
YJL048C	2422	4683	4486	4469	2372	1908	2816	2688								YJL048C	2651.05	2759.25	5519.19	4854.44	2222.43	2710.61	3077.6	2772.28								YJL048C	1191	1.191	2225.9	2316.75	4634.08	4075.94	1866.02	2275.91	2584.04	2327.69
YJL047C-A	292	512	237	233	304	277	292	216								YJL047C-A	319.615	301.673	291.585	253.096	284.831	393.522	319.126	222.772								YJL047C-A	135	0.135	2367.52	2234.62	2159.89	1874.78	2109.86	2914.98	2363.89	1650.17
YJL047C	1193	1668	2581	2884	1490	1323	2049	1870								YJL047C	1305.82	982.795	3175.44	3132.74	1396.05	1879.53	2239.34	1928.63								YJL047C	2529	2.529	516.34	388.61	1255.61	1238.73	552.015	743.19	885.466	762.606
YJL046W	506	748	713	726	499	510	711	733								YJL046W	553.853	440.726	877.215	788.616	467.535	724.535	777.049	755.982								YJL046W	1230	1.23	450.287	358.314	713.183	641.151	380.11	589.053	631.747	614.619
YJL045W	44	92	82	95	38	55	51	42								YJL045W	48.1611	54.2069	100.886	103.194	35.6039	78.1361	55.7377	43.3168								YJL045W	1905	1.905	25.2814	28.4551	52.9584	54.1699	18.6897	41.0163	29.2586	22.7385
YJL044C	1439	1400	1477	1482	1403	1411	1843	1737								YJL044C	1575.09	824.888	1817.18	1609.82	1314.53	2004.55	2014.21	1791.46								YJL044C	1377	1.377	1143.85	599.047	1319.66	1169.08	954.635	1455.73	1462.75	1300.99
YJL043W	23	31	8	13	19	21	19	25								YJL043W	25.1751	18.2654	9.84252	14.1212	17.8019	29.8338	20.765	25.7838								YJL043W	774	0.774	32.526	23.5987	12.7164	18.2445	22.9999	38.5449	26.8282	33.3124
YJL042W	6040	4180	12017	12252	5019	5283	8527	7641								YJL042W	6611.21	2462.88	14784.7	13308.7	4702.52	7505.33	9319.13	7880.57								YJL042W	4197	4.197	1575.22	586.819	3522.68	3171.01	1120.45	1788.26	2220.43	1877.67
YJL041W	12686	10821	16746	18266	13470	12641	18166	16425								YJL041W	13885.7	6375.8	20602.9	19841.4	12620.6	17958.5	19853.6	16940								YJL041W	2472	2.472	5617.2	2579.21	8334.49	8026.46	5105.43	7264.77	8031.37	6852.74
YJL039C	9660	13518	16785	17743	11855	11179	17305	15797								YJL039C	10573.6	7964.88	20650.8	19273.3	11107.5	15881.5	18912.6	16292.3								YJL039C	5052	5.052	2092.94	1576.58	4087.66	3814.98	2198.63	3143.61	3743.58	3224.92
YJL038C	0	4	16	27	6	3	3	4								YJL038C	0	2.35682	19.685	29.3287	5.62166	4.26197	3.27869	4.12541								YJL038C	660	0.66	0	3.57094	29.8258	44.4374	8.51767	6.45753	4.96771	6.25063
YJL037W	28	45	79	75	39	29	37	21								YJL037W	30.648	26.5143	97.1949	81.4686	36.5408	41.199	40.4372	21.6584								YJL037W	675	0.675	45.4044	39.2804	143.992	120.694	54.1345	61.0356	59.9069	32.0865
YJL036W	937	1540	1981	2066	921	798	1334	1163								YJL036W	1025.61	907.377	2437.25	2244.19	862.925	1133.68	1457.92	1199.46								YJL036W	1272	1.272	806.299	713.347	1916.08	1764.3	678.4	891.261	1146.17	942.975
YJL035C	417	284	402	484	343	335	447	405								YJL035C	456.436	167.334	494.587	525.744	321.372	475.92	488.525	417.698								YJL035C	753	0.753	606.157	222.224	656.822	698.199	426.788	632.032	648.771	554.712
YJL034W	48764	47636	67935	69700	48409	44020	71834	63913								YJL034W	53375.7	28067.4	83581.4	75711.5	45356.5	62537.3	78507.1	65916.9								YJL034W	2049	2.049	26049.6	13698.1	40791.3	36950.5	22135.9	30520.9	38314.8	32170.3
YJL033W	4117	3559	4815	5593	5210	5283	6169	5794								YJL033W	4506.35	2096.98	5923.97	6075.39	4881.48	7505.33	6742.08	5975.66								YJL033W	2313	2.313	1948.27	906.608	2561.16	2626.63	2110.45	3244.85	2914.86	2583.51
YJL032W	1	2	1	5	1	1	3	1								YJL032W	1.09457	1.17841	1.23031	5.43124	0.936944	1.42066	3.27869	1.03135								YJL032W	315	0.315	3.47483	3.74099	3.90576	17.242	2.97442	4.51002	10.4085	3.27414
YJL031C	672	1161	1237	1369	740	646	925	812								YJL031C	735.552	684.068	1521.9	1487.07	693.338	917.744	1010.93	837.459								YJL031C	984	0.984	747.512	695.191	1546.65	1511.25	704.612	932.667	1027.37	851.076
YJL030W	450	637	697	729	493	397	593	458								YJL030W	492.557	375.324	857.53	791.875	461.913	564.001	648.087	472.36								YJL030W	591	0.591	833.43	635.066	1450.98	1339.89	781.579	954.316	1096.59	799.255
YJL029C	3368	2552	5374	5816	3742	3419	5018	4630								YJL029C	3686.51	1503.65	6611.71	6317.62	3506.04	4857.22	5484.15	4775.17								YJL029C	2469	2.469	1493.12	609.013	2677.89	2558.78	1420.03	1967.28	2221.2	1934.05
YJL028W	9	15	8	12	4	6	9	5								YJL028W	9.85114	8.83809	9.84252	13.035	3.74777	8.52394	9.83607	5.15677								YJL028W	336	0.336	29.3189	26.3038	29.2932	38.7946	11.1541	25.3689	29.274	15.3475
YJL027C	9	9	5	12	9	7	8	18								YJL027C	9.85114	5.30285	6.15157	13.035	8.43249	9.94459	8.74317	18.5644								YJL027C	417	0.417	23.6238	12.7167	14.752	31.2589	20.2218	23.8479	20.9668	44.5188
YJL025W	1327	1194	1705	1706	1356	1341	1574	1565								YJL025W	1452.5	703.512	2097.69	1853.14	1270.5	1905.1	1720.22	1614.07								YJL025W	1545	1.545	940.127	455.347	1357.73	1199.44	822.327	1233.07	1113.41	1044.7
YJL024C	1473	1713	2243	2604	1490	1343	1768	1585								YJL024C	1612.3	1009.31	2759.6	2828.59	1396.05	1907.94	1932.24	1634.69								YJL024C	585	0.585	2756.07	1725.32	4717.26	4835.2	2386.4	3261.44	3302.98	2794.35
YJL023C	196	387	297	337	257	197	316	290								YJL023C	214.536	228.023	365.404	366.066	240.795	279.869	345.355	299.092								YJL023C	1044	1.044	205.494	218.412	350.003	350.638	230.646	268.074	330.8	286.487
YJL022W	15	22	23	28	15	13	16	8								YJL022W	16.4186	12.9625	28.2972	30.4149	14.0542	18.4685	17.4863	8.25083								YJL022W	309	0.309	53.1345	41.9499	91.5768	98.4302	45.4827	59.7687	56.5901	26.7017
YJL020C	14289	7575	26768	29536	12498	13194	19926	17309								YJL020C	15640.3	4463.23	32933.1	32083.4	11709.9	18744.1	21777	17851.7								YJL020C	3474	3.474	4502.11	1284.75	9479.87	9235.3	3370.73	5395.55	6268.58	5138.66
YJL020W-A	0	0	1	1	1	0	0	0								YJL020W-A	0	0	1.23031	1.08625	0.936944	0	0	0								YJL020W-A	258	0.258	0	0	4.76866	4.21026	3.63156	0	0	0
YJL019W	2039	1089	1987	2006	1986	1941	2828	2477								YJL019W	2231.83	641.645	2444.64	2179.01	1860.77	2757.49	3090.71	2554.66								YJL019W	2049	2.049	1089.23	313.15	1193.09	1063.45	908.136	1345.78	1508.4	1246.78
YJL016W	1775	1181	3372	3471	2030	1866	2504	2363								YJL016W	1942.86	695.852	4148.62	3770.37	1902	2650.94	2736.61	2437.09								YJL016W	1686	1.686	1152.35	412.724	2460.63	2236.28	1128.11	1572.33	1623.14	1445.48
YJL015C	3	15	3	5	3	2	6	12								YJL015C	3.28371	8.83809	3.69094	5.43124	2.81083	2.84131	6.55738	12.3762								YJL015C	285	0.285	11.5218	31.0108	12.9507	19.057	9.86257	9.96952	23.0083	43.4254
YJL014W	11567	16870	13764	14715	13560	12250	16074	14779								YJL014W	12660.9	9939.9	16934.1	15984.1	12705	17403	17567.2	15242.4								YJL014W	1605	1.605	7888.41	6193.08	10550.8	9958.97	7915.86	10843	10945.3	9496.8
YJL013C	347	494	525	612	364	453	567	538								YJL013C	379.816	291.068	645.915	664.784	341.048	643.557	619.672	554.868								YJL013C	1548	1.548	245.359	188.028	417.258	429.447	220.315	415.735	400.305	358.442
YJL012C	23812	26181	39610	39490	30186	26204	35837	35086								YJL012C	26063.9	15426	48732.8	42895.9	28282.6	37226.9	39166.1	36186.1								YJL012C	2166	2.166	12033.2	7121.88	22499	19804.2	13057.5	17186.9	18082.2	16706.4
YJL011C	467	817	609	635	433	407	464	456								YJL011C	511.165	481.381	749.262	689.768	405.697	578.207	507.104	470.297								YJL011C	486	0.486	1051.78	990.496	1541.69	1419.27	834.767	1189.73	1043.42	967.689
YJL010C	3277	3810	3479	3971	3903	3844	4820	4557								YJL010C	3586.91	2244.87	4280.27	4313.49	3656.89	5461	5267.76	4699.88								YJL010C	2001	2.001	1792.56	1121.88	2139.06	2155.67	1827.53	2729.14	2632.56	2348.76
YJL009W	7	20	2	0	4	3	8	4								YJL009W	7.662	11.7841	2.46063	0	3.74777	4.26197	8.74317	4.12541								YJL009W	327	0.327	23.4312	36.037	7.52486	0	11.4611	13.0335	26.7375	12.6159
YJL008C	11648	13293	14541	15188	13563	12810	16908	16038								YJL008C	12749.6	7832.31	17890	16497.9	12707.8	18198.6	18478.7	16540.8								YJL008C	1707	1.707	7468.99	4588.35	10480.4	9664.87	7444.5	10661.2	10825.2	9690.01
YJL007C	0	0	0	0	0	0	0	0								YJL007C	0	0	0	0	0	0	0	0								YJL007C	315	0.315	0	0	0	0	0	0	0	0
YJL006C	735	1641	1528	1615	741	681	951	913								YJL006C	804.51	966.887	1879.92	1754.29	694.275	967.467	1039.34	941.625								YJL006C	972	0.972	827.685	994.739	1934.08	1804.83	714.275	995.336	1069.28	968.75
YJL005W	4954	3869	11873	12398	5639	4961	9233	8121								YJL005W	5422.5	2279.64	14607.5	13467.3	5283.43	7047.88	10090.7	8375.62								YJL005W	6081	6.081	891.713	374.879	2402.16	2214.65	868.842	1159	1659.38	1377.34
YJL004C	816	1893	1123	1090	896	833	1017	932								YJL004C	893.17	1115.37	1381.64	1184.01	839.502	1183.41	1111.48	961.221								YJL004C	612	0.612	1459.43	1822.49	2257.59	1934.66	1371.73	1933.67	1816.14	1570.62
YJL003W	235	424	480	468	214	173	300	211								YJL003W	257.224	249.823	590.551	508.364	200.506	245.774	327.869	217.616								YJL003W	357	0.357	720.516	699.785	1654.2	1423.99	561.641	688.441	918.4	609.567
YJL002C	13653	17823	12302	12188	15085	13421	17391	15747								YJL002C	14944.2	10501.4	15135.3	13239.2	14133.8	19066.6	19006.6	16240.7								YJL002C	1431	1.431	10443.2	7338.51	10576.8	9251.71	9876.87	13324	13282	11349.2
YJL001W	5207	5659	5856	5931	4720	4256	5731	5146								YJL001W	5699.43	3334.32	7204.72	6442.54	4422.37	6046.31	6263.39	5307.34								YJL001W	648	0.648	8795.42	5145.55	11118.4	9942.19	6824.65	9330.73	9665.72	8190.34
YJR001W	5399	5380	7786	7722	5411	5083	6754	6369								YJR001W	5909.59	3169.93	9579.23	8388.01	5069.8	7221.2	7381.42	6568.69								YJR001W	1809	1.809	3266.77	1752.31	5295.32	4636.82	2802.54	3991.82	4080.39	3631.12
YJR002W	2941	2245	3610	3927	3712	3634	4695	4477								YJR002W	3219.13	1322.77	4441.44	4265.7	3477.93	5162.67	5131.15	4617.37								YJR002W	1782	1.782	1806.47	742.293	2492.39	2393.77	1951.7	2897.12	2879.43	2591.12
YJR003C	1637	2511	1790	1885	2052	1966	2557	2421								YJR003C	1791.81	1479.5	2202.26	2047.58	1922.61	2793.01	2794.54	2496.91								YJR003C	1560	1.56	1148.6	948.395	1411.71	1312.55	1232.44	1790.39	1791.37	1600.58
YJR004C	1298	577	1596	1747	1256	1284	1687	1483								YJR004C	1420.75	339.972	1963.58	1897.68	1176.8	1824.12	1843.72	1529.5								YJR004C	1953	1.953	727.472	174.077	1005.42	971.672	602.561	934.011	944.043	783.152
YJR005W	2762	4125	4896	5230	3174	2973	4276	3707								YJR005W	3023.2	2430.47	6023.62	5681.08	2973.86	4223.61	4673.22	3823.23								YJR005W	2103	2.103	1437.57	1155.72	2864.3	2701.42	1414.1	2008.37	2222.17	1817.99
YJR005C-A	1	0	8	9	0	0	0	0								YJR005C-A	1.09457	0	9.84252	9.77623	0	0	0	0								YJR005C-A	282	0.282	3.88146	0	34.9026	34.6675	0	0	0	0
YJR006W	2029	1650	2822	2730	2170	2060	2788	2500								YJR006W	2220.88	972.189	3471.95	2965.46	2033.17	2926.55	3046.99	2578.38								YJR006W	1464	1.464	1517	664.064	2371.55	2025.59	1388.78	1999.01	2081.28	1761.19
YJR007W	13809	17405	15409	15163	14772	14873	17075	16318								YJR007W	15114.9	10255.1	18957.9	16470.8	13840.5	21129.4	18661.2	16829.6								YJR007W	915	0.915	16519	11207.8	20719	18000.9	15126.3	23092.3	20394.8	18393
YJR008W	317	354	1874	1915	327	268	510	386								YJR008W	346.979	208.579	2305.61	2080.17	306.381	380.736	557.377	398.102								YJR008W	1017	1.017	341.179	205.092	2267.07	2045.39	301.259	374.372	548.06	391.448
YJR009C	162431	244164	161444	161535	210311	198352	233012	218843								YJR009C	177792	143863	198627	175467	197050	281790	254658	225704								YJR009C	999	0.999	177970	144007	198826	175643	197247	282072	254913	225930
YJR010W	2637	2339	2844	2772	4901	4041	5278	4841								YJR010W	2886.38	1378.15	3499.02	3011.08	4591.96	5740.87	5768.31	4992.78								YJR010W	1536	1.536	1879.16	897.235	2278.01	1960.34	2989.56	3737.55	3755.41	3250.51
YJR010C-A	870	1660	1546	1357	747	678	950	910								YJR010C-A	952.277	978.082	1902.07	1474.04	699.897	963.205	1038.25	938.531								YJR010C-A	285	0.285	3341.32	3431.87	6673.92	5172.07	2455.78	3379.67	3642.99	3293.09
YJR011C	502	1055	762	825	581	471	647	621								YJR011C	549.475	621.612	937.5	896.155	544.364	669.129	707.104	640.47								YJR011C	786	0.786	699.077	790.855	1192.75	1140.15	692.575	851.309	899.623	814.848
YJR012C	233	460	322	380	252	229	378	262								YJR012C	255.035	271.035	396.161	412.774	236.11	325.33	413.115	270.215								YJR012C	624	0.624	408.71	434.35	634.874	661.497	378.381	521.363	662.043	433.036
YJR013W	1173	1544	1756	1793	1150	1081	1603	1473								YJR013W	1283.93	909.734	2160.43	1947.64	1077.49	1535.73	1751.91	1519.18								YJR013W	1212	1.212	1059.35	750.605	1782.54	1606.97	889.014	1267.1	1445.47	1253.45
YJR014W	3002	3731	4534	4328	3102	2907	3850	3585								YJR014W	3285.9	2198.33	5578.25	4701.28	2906.4	4129.85	4207.65	3697.4								YJR014W	597	0.597	5504.02	3682.29	9343.8	7874.84	4868.34	6917.67	7047.99	6193.3
YJR015W	10328	12898	11459	12091	10775	10192	13846	13003								YJR015W	11304.7	7599.58	14098.2	13133.8	10095.6	14479.3	15132.2	13410.7								YJR015W	1533	1.533	7374.25	4957.32	9196.46	8567.4	6585.5	9445.09	9871	8748
YJR016C	41029	64292	57481	55560	49753	44181	61038	61132								YJR016C	44909.2	37881.2	70719.7	60351.9	46615.8	62766	66708.2	63048.7								YJR016C	1758	1.758	25545.6	21547.9	40227.4	34329.9	26516.4	35703.1	37945.5	35863.9
YJR017C	4650	5640	4900	4958	4449	4068	5393	4931								YJR017C	5089.75	3323.12	6028.54	5385.62	4168.46	5779.23	5893.99	5085.6								YJR017C	513	0.513	9921.55	6477.82	11751.5	10498.3	8125.66	11265.6	11489.3	9913.45
YJR018W	22	46	6	11	19	26	29	23								YJR018W	24.0806	27.1035	7.38189	11.9487	17.8019	36.9371	31.694	23.7211								YJR018W	363	0.363	66.3376	74.6652	20.3358	32.9166	49.0411	101.755	87.3113	65.3474
YJR019C	1044	1444	1691	1779	937	807	1258	1162								YJR019C	1142.73	850.813	2080.46	1932.44	877.916	1146.47	1374.86	1198.43								YJR019C	1050	1.05	1088.32	810.298	1981.39	1840.41	836.111	1091.88	1309.39	1141.36
YJR020W	28	60	30	22	18	37	15	16								YJR020W	30.648	35.3523	36.9094	23.8975	16.865	52.5643	16.3934	16.5017								YJR020W	333	0.333	92.036	106.163	110.839	71.7641	50.6456	157.851	49.2296	49.5545
YJR021C	551	344	792	795	545	533	674	641								YJR021C	603.109	202.687	974.409	863.567	510.634	757.21	736.612	661.097								YJR021C	945	0.945	638.21	214.483	1031.12	913.828	540.354	801.28	779.484	699.574
YJR022W	196	303	425	449	230	222	217	213								YJR022W	214.536	178.529	522.884	487.725	215.497	315.386	237.158	219.678								YJR022W	330	0.33	650.109	540.998	1584.5	1477.96	653.021	955.714	718.662	665.692
YJR023C	8	8	2	1	4	2	4	1								YJR023C	8.75657	4.71365	2.46063	1.08625	3.74777	2.84131	4.37158	1.03135								YJR023C	402	0.402	21.7825	11.7255	6.12097	2.70211	9.32282	7.06794	10.8746	2.56556
YJR024C	2008	3826	1663	1683	1983	1761	2299	1985								YJR024C	2197.9	2254.3	2046.01	1828.16	1857.96	2501.78	2512.57	2047.24								YJR024C	735	0.735	2990.34	3067.08	2783.69	2487.29	2527.84	3403.78	3418.46	2785.36
YJR025C	1644	2249	1619	1387	1978	1827	2048	1796								YJR025C	1799.47	1325.12	1991.88	1506.63	1853.27	2595.54	2238.25	1852.31								YJR025C	534	0.534	3369.8	2481.51	3730.11	2821.4	3470.55	4860.56	4191.48	3468.75
YJR027W	19277	10881	34581	39156	34393	39404	60164	45240								YJR027W	21100	6411.15	42545.5	42533.1	32224.3	55979.5	65753	46658.4								YJR027W	5268	5.268	4005.32	1217	8076.22	8073.87	6116.99	10626.3	12481.6	8856.95
YJR026W	0	0	0	0	0	0	0	0								YJR026W	0	0	0	0	0	0	0	0								YJR026W	1323	1.323	0	0	0	0	0	0	0	0
YJR029W	19784	12264	32321	37084	29980	34088	52213	41193								YJR029W	21655	7226.02	39765	40282.4	28089.6	48427.3	57063.4	42484.5								YJR029W	5268	5.268	4110.67	1371.68	7548.41	7646.63	5332.11	9192.74	10832.1	8064.64
YJR028W	0	0	0	0	0	0	0	0								YJR028W	0	0	0	0	0	0	0	0								YJR028W	1323	1.323	0	0	0	0	0	0	0	0
YJR030C	1571	1674	2581	2773	1547	1552	2485	2224								YJR030C	1719.57	986.33	3175.44	3012.17	1449.45	2204.86	2715.85	2293.73								YJR030C	2238	2.238	768.352	440.72	1418.88	1345.92	647.655	985.192	1213.52	1024.9
YJR031C	2733	3307	4760	5206	3438	3076	4699	4228								YJR031C	2991.46	1948.5	5856.3	5655.01	3221.21	4369.94	5135.52	4360.56								YJR031C	4227	4.227	707.703	460.966	1385.45	1337.83	762.056	1033.82	1214.93	1031.6
YJR032W	707	1053	982	1090	860	778	1020	943								YJR032W	773.862	620.434	1208.17	1184.01	805.772	1105.27	1114.75	972.566								YJR032W	1182	1.182	654.705	524.902	1022.14	1001.7	681.702	935.085	943.108	822.814
YJR033C	2802	2148	5745	6099	2948	2777	4414	3915								YJR033C	3066.99	1265.61	7068.16	6625.03	2762.11	3945.16	4824.04	4037.75								YJR033C	4074	4.074	752.82	310.656	1734.94	1626.17	677.985	968.376	1184.1	991.102
YJR034W	285	456	534	490	240	216	292	266								YJR034W	311.953	268.678	656.988	532.262	224.866	306.862	319.126	274.34								YJR034W	327	0.327	953.984	821.645	2009.14	1627.71	687.665	938.415	975.92	838.96
YJR035W	496	405	1065	1175	560	531	821	704								YJR035W	542.907	238.628	1310.29	1276.34	524.688	754.369	897.268	726.073								YJR035W	3258	3.258	166.638	73.2438	402.175	391.756	161.046	231.543	275.404	222.858
YJR036C	174	162	345	312	205	188	261	240								YJR036C	190.455	95.4513	424.459	338.909	192.073	267.083	285.246	247.525								YJR036C	2679	2.679	71.092	35.6295	158.439	126.506	71.696	99.6952	106.475	92.3945
YJR037W	0	0	0	0	0	0	2	0								YJR037W	0	0	0	0	0	0	2.18579	0								YJR037W	384	0.384	0	0	0	0	0	0	5.69217	0
YJR038C	5	1	18	3	8	6	6	3								YJR038C	5.47285	0.589206	22.1457	3.25874	7.49555	8.52394	6.55738	3.09406								YJR038C	363	0.363	15.0767	1.62316	61.0074	8.97726	20.6489	23.4819	18.0644	8.52358
YJR039W	700	715	1380	1413	689	638	1091	1020								YJR039W	766.2	421.282	1697.83	1534.87	645.554	906.379	1192.35	1051.98								YJR039W	3366	3.366	227.629	125.158	504.407	455.992	191.787	269.275	354.233	312.531
YJR040W	1740	1383	1922	1872	1646	1614	2245	1952								YJR040W	1904.55	814.872	2364.67	2033.46	1542.21	2292.94	2453.55	2013.2								YJR040W	2340	2.34	813.912	348.236	1010.54	868.998	659.064	979.889	1048.53	860.342
YJR041C	5548	8443	9006	10018	7247	7371	10118	9134								YJR041C	6072.68	4974.66	11080.2	10882	6790.03	10471.7	11057.9	9420.38								YJR041C	3525	3.525	1722.75	1411.25	3143.32	3087.1	1926.25	2970.68	3137	2672.45
YJR042W	2195	1996	3389	3696	2513	2243	3217	2853								YJR042W	2402.58	1176.05	4169.54	4014.77	2354.54	3186.53	3515.85	2942.45								YJR042W	2235	2.235	1074.98	526.199	1865.56	1796.32	1053.49	1425.74	1573.09	1316.53
YJR043C	1656	1482	1982	2137	1653	1521	2198	2017								YJR043C	1812.61	873.203	2438.48	2321.31	1548.77	2160.82	2402.19	2080.24								YJR043C	1053	1.053	1721.38	829.253	2315.75	2204.48	1470.81	2052.06	2281.28	1975.54
YJR044C	2648	3851	3392	3425	2286	2190	2932	2698								YJR044C	2898.42	2269.03	4173.23	3720.4	2141.85	3111.24	3204.37	2782.59								YJR044C	423	0.423	6852.07	5364.14	9865.79	8795.27	5063.48	7355.17	7575.35	6578.23
YJR045C	77667	81725	94402	95956	79953	78142	103782	95578								YJR045C	85012	48152.8	116144	104232	74911.5	111013	113423	98574.7								YJR045C	1965	1.965	43263.1	24505.3	59106.5	53044.3	38122.9	56495.1	57721.6	50165.2
YJR046W	3167	2398	3120	3053	2761	2734	4131	3849								YJR046W	3466.51	1412.92	3838.58	3316.32	2586.9	3884.07	4514.75	3969.68								YJR046W	1815	1.815	1909.92	778.466	2114.92	1827.17	1425.29	2139.99	2487.47	2187.15
YJR047C	120	195	104	93	264	135	153	193								YJR047C	131.349	114.895	127.953	101.021	247.353	191.789	167.213	199.051								YJR047C	474	0.474	277.107	242.395	269.943	213.125	521.842	404.617	352.77	419.939
YJR048W	16827	29293	18570	17952	11878	10502	16187	13895								YJR048W	18418.3	17259.6	22846.9	19500.3	11129	14919.7	17690.7	14330.7								YJR048W	330	0.33	55813.2	52301.8	69233.2	59091.9	33724.3	45211.3	53608.2	43426.2
YJR049C	1159	1055	1161	1151	1349	1209	1508	1422								YJR049C	1268.61	621.612	1428.4	1250.27	1263.94	1717.57	1648.09	1466.58								YJR049C	1593	1.593	796.364	390.215	896.67	784.853	793.432	1078.2	1034.58	920.643
YJR050W	255	330	485	499	295	283	393	357								YJR050W	279.116	194.438	596.703	542.038	276.398	402.046	429.508	368.193								YJR050W	708	0.708	394.231	274.63	842.801	765.59	390.393	567.861	606.65	520.047
YJR051W	816	853	1279	1262	1055	926	1230	1057								YJR051W	893.17	502.593	1573.57	1370.85	988.476	1315.53	1344.26	1090.14								YJR051W	1506	1.506	593.074	333.727	1044.87	910.256	656.358	873.524	892.604	723.865
YJR052W	346	432	924	1061	405	334	496	455								YJR052W	378.722	254.537	1136.81	1152.51	379.462	474.499	542.077	469.266								YJR052W	1698	1.698	223.04	149.904	669.5	678.745	223.476	279.446	319.244	276.364
YJR053W	380	378	580	670	421	410	629	589								YJR053W	415.937	222.72	713.583	727.786	394.453	582.469	687.432	607.467								YJR053W	1725	1.725	241.123	129.113	413.671	421.905	228.669	337.663	398.511	352.155
YJR054W	721	1430	1703	1849	919	811	1252	1164								YJR054W	789.186	842.564	2095.23	2008.47	861.051	1152.15	1368.31	1200.5								YJR054W	1494	1.494	528.237	563.965	1402.43	1344.36	576.34	771.186	915.867	803.544
YJR055W	135	131	165	203	113	100	143	146								YJR055W	147.767	77.186	203.002	220.508	105.875	142.066	156.284	150.578								YJR055W	495	0.495	298.519	155.931	410.105	445.471	213.888	287.001	315.726	304.197
YJR056C	577	524	1726	1859	605	618	859	891								YJR056C	631.567	308.744	2123.52	2019.34	566.851	877.966	938.798	918.936								YJR056C	711	0.711	888.28	434.239	2986.67	2840.13	797.259	1234.83	1320.39	1292.46
YJR057W	643	1335	767	767	750	599	746	790								YJR057W	703.809	786.59	943.652	833.152	702.708	850.973	815.301	814.769								YJR057W	651	0.651	1081.12	1208.28	1449.54	1279.8	1079.43	1307.18	1252.38	1251.57
YJR058C	425	527	621	558	433	391	496	534								YJR058C	465.193	310.511	764.026	606.126	405.697	555.477	542.077	550.743								YJR058C	444	0.444	1047.73	699.35	1720.78	1365.15	913.731	1251.07	1220.89	1240.41
YJR059W	6058	3677	11104	10894	5464	5150	7821	6964								YJR059W	6630.91	2166.51	13661.4	11833.6	5119.46	7316.38	8547.54	7182.34								YJR059W	2457	2.457	2698.78	881.77	5560.2	4816.27	2083.62	2977.77	3478.85	2923.22
YJR060W	2523	1914	3383	3364	2673	2518	3149	2873								YJR060W	2761.6	1127.74	4162.16	3654.14	2504.45	3577.21	3441.53	2963.08								YJR060W	1056	1.056	2615.15	1067.94	3941.44	3460.36	2371.64	3387.51	3259.02	2805.94
YJR061W	562	560	759	849	702	605	878	832								YJR061W	615.149	329.955	933.809	922.225	657.734	859.497	959.563	858.086								YJR061W	2808	2.808	219.07	117.505	332.553	328.428	234.236	306.089	341.725	305.586
YJR062C	1406	1428	2235	2355	1368	1339	1915	1730								YJR062C	1538.97	841.386	2749.75	2558.11	1281.74	1902.26	2092.9	1784.24								YJR062C	1374	1.374	1120.06	612.362	2001.28	1861.8	932.852	1384.47	1523.21	1298.57
YJR063W	3417	5829	3892	4180	3319	3239	3894	3736								YJR063W	3740.15	3434.48	4788.39	4540.52	3109.72	4601.51	4255.74	3853.14								YJR063W	378	0.378	9894.57	9085.93	12667.7	12011.9	8226.76	12173.3	11258.6	10193.5
YJR064W	11161	11574	11072	10978	12233	11329	14168	13649								YJR064W	12216.5	6819.47	13622	11924.8	11461.6	16094.6	15484.2	14076.9								YJR064W	1689	1.689	7232.98	4037.58	8065.16	7060.29	6786.05	9529.08	9167.65	8334.48
YJR065C	9130	9447	13829	13750	8685	8261	11012	10147								YJR065C	9993.43	5566.23	17014	14935.9	8137.36	11736	12035	10465.1								YJR065C	1350	1.35	7402.54	4123.13	12603	11063.6	6027.67	8693.36	8914.79	7751.96
YJR066W	7093	5832	11177	12500	7868	7130	11186	9519								YJR066W	7763.79	3436.25	13751.2	13578.1	7371.87	10129.3	12225.1	9817.45								YJR066W	7413	7.413	1047.32	463.543	1855.02	1831.66	994.452	1366.42	1649.15	1324.36
YJR067C	211	378	373	352	250	200	283	302								YJR067C	230.954	222.72	458.907	382.359	234.236	284.131	309.29	311.469								YJR067C	426	0.426	542.147	522.816	1077.25	897.557	549.85	666.975	726.032	731.147
YJR068W	2192	3680	2764	2835	2715	2282	3073	2900								YJR068W	2399.3	2168.28	3400.59	3079.51	2543.8	3241.94	3358.47	2990.92								YJR068W	1062	1.062	2259.23	2041.69	3202.06	2899.73	2395.29	3052.67	3162.4	2816.31
YJR069C	1561	2311	1958	2012	1570	1380	1789	1656								YJR069C	1708.63	1361.65	2408.96	2185.53	1471	1960.51	1955.19	1707.92								YJR069C	594	0.594	2876.47	2292.35	4055.48	3679.35	2476.43	3300.51	3291.57	2875.29
YJR070C	16606	16345	12263	13051	18083	16587	19638	19040								YJR070C	18176.4	9630.57	15087.4	14176.6	16942.8	23564.4	21462.3	19637								YJR070C	978	0.978	18585.3	9847.21	15426.7	14495.5	17323.9	24094.5	21945.1	20078.7
YJR071W	0	0	1	2	1	0	0	0								YJR071W	0	0	1.23031	2.1725	0.936944	0	0	0								YJR071W	369	0.369	0	0	3.33419	5.88752	2.53914	0	0	0
YJR072C	3839	4899	4929	5024	4332	4036	4990	4837								YJR072C	4202.06	2886.52	6064.22	5457.31	4058.84	5733.77	5453.55	4988.66								YJR072C	1158	1.158	3628.72	2492.68	5236.81	4712.7	3505.04	4951.44	4709.46	4307.99
YJR073C	2776	3913	8122	7764	2596	2047	3023	2980								YJR073C	3038.53	2305.56	9992.62	8433.63	2432.31	2908.08	3303.83	3073.43								YJR073C	621	0.621	4892.96	3712.66	16091.2	13580.7	3916.76	4682.9	5320.17	4949.17
YJR074W	1461	1517	1920	2019	1349	1191	1628	1511								YJR074W	1599.17	893.825	2362.2	2193.13	1263.94	1692	1779.23	1558.37								YJR074W	657	0.657	2434.05	1360.46	3595.44	3338.1	1923.8	2575.35	2708.12	2371.96
YJR075W	7285	8004	8577	8856	7679	7376	9559	8803								YJR075W	7973.95	4716	10552.4	9619.81	7194.79	10478.8	10447	9079								YJR075W	1191	1.191	6695.17	3959.7	8860.13	8077.09	6040.97	8798.29	8771.62	7623.01
YJR076C	2931	2635	5231	5351	2963	2726	4259	3566								YJR076C	3208.19	1552.56	6435.78	5812.51	2776.16	3872.71	4654.64	3677.81								YJR076C	1248	1.248	2570.66	1244.04	5156.87	4657.46	2224.49	3103.13	3729.68	2946.96
YJR077C	22391	30016	25610	26102	17089	17142	24837	21279								YJR077C	24508.5	17685.6	31508.4	28353.2	16011.4	24352.9	27144.3	21946.2								YJR077C	936	0.936	26184.3	18894.9	33662.8	30291.9	17106.2	26018	29000.3	23446.8
YJR078W	448	498	520	561	483	468	612	508								YJR078W	490.368	293.424	639.764	609.385	452.544	664.867	668.852	523.927								YJR078W	1362	1.362	360.035	215.436	469.724	447.419	332.264	488.155	491.081	384.675
YJR079W	27	24	17	20	24	19	31	25								YJR079W	29.5534	14.1409	20.9154	21.725	22.4866	26.9925	33.8798	25.7838								YJR079W	330	0.33	89.5558	42.8513	63.3799	65.8332	68.1414	81.7954	102.666	78.1328
YJR080C	2185	2797	3948	3916	2067	1908	2926	2549								YJR080C	2391.64	1648.01	4857.28	4253.75	1936.66	2710.61	3197.81	2628.92								YJR080C	1185	1.185	2018.26	1390.72	4098.97	3589.66	1634.31	2287.44	2698.58	2218.5
YJR082C	821	1468	1048	1039	775	831	1081	950								YJR082C	898.643	864.954	1289.37	1128.61	726.131	1180.57	1181.42	979.785								YJR082C	342	0.342	2627.61	2529.11	3770.09	3300.03	2123.19	3451.95	3454.45	2864.87
YJR083C	915	810	1801	1877	804	747	1068	956								YJR083C	1001.53	477.257	2215.8	2038.89	753.303	1061.23	1167.21	985.974								YJR083C	930	0.93	1076.92	513.179	2382.58	2192.35	810.003	1141.11	1255.07	1060.19
YJR084W	768	508	1237	1268	831	771	1049	939								YJR084W	840.63	299.317	1521.9	1377.36	778.6	1095.33	1146.45	968.441								YJR084W	1272	1.272	660.873	235.312	1196.46	1082.83	612.107	861.105	901.296	761.353
YJR085C	1381	2291	2087	1980	1068	1065	1214	1052								YJR085C	1511.6	1349.87	2567.67	2150.77	1000.66	1513	1326.78	1084.98								YJR085C	318	0.318	4753.47	4244.88	8074.43	6763.43	3146.72	4757.86	4172.25	3411.9
YJR086W	633	1337	1157	1066	658	515	705	670								YJR086W	692.863	787.768	1423.47	1157.94	616.509	731.638	770.492	691.007								YJR086W	333	0.333	2080.67	2365.67	4274.7	3477.3	1851.38	2197.11	2313.79	2075.09
YJR087W	143	275	217	243	129	115	199	145								YJR087W	156.524	162.032	266.978	263.958	120.866	163.375	217.486	149.546								YJR087W	351	0.351	445.936	461.628	760.622	752.018	344.347	465.457	619.619	426.058
YJR088C	1458	2990	2696	2651	1737	1442	1872	1794								YJR088C	1595.88	1761.73	3316.93	2879.64	1627.47	2048.59	2045.9	1850.25								YJR088C	879	0.879	1815.57	2004.24	3773.53	3276.05	1851.5	2330.59	2327.53	2104.95
YJR089W	532	637	1302	1417	599	604	986	820								YJR089W	582.312	375.324	1601.87	1539.21	561.229	858.076	1077.6	845.71								YJR089W	2865	2.865	203.25	131.003	559.117	537.247	195.892	299.503	376.124	295.187
YJR090C	3669	3208	6206	6796	4016	3994	6013	5236								YJR090C	4015.98	1890.17	7635.33	7382.14	3762.77	5674.1	6571.58	5400.17								YJR090C	3456	3.456	1162.03	546.925	2209.3	2136.04	1088.76	1641.81	1901.5	1562.55
YJR091C	7532	4552	14668	15760	7437	7712	11826	10156								YJR091C	8244.31	2682.06	18046.3	17119.3	6968.05	10956.1	12924.6	10474.4								YJR091C	3276	3.276	2516.58	818.701	5508.63	5225.66	2127	3344.35	3945.24	3197.32
YJR092W	3588	1728	6241	7001	4380	4508	6589	5748								YJR092W	3927.32	1018.15	7678.4	7604.82	4103.81	6404.32	7201.09	5928.22								YJR092W	4344	4.344	904.079	234.38	1767.59	1750.65	944.708	1474.29	1657.71	1364.69
YJR093C	2081	1672	2939	3058	1886	1956	2457	2164								YJR093C	2277.8	985.152	3615.9	3321.75	1767.08	2778.8	2685.25	2231.85								YJR093C	984	0.984	2314.84	1001.17	3674.69	3375.76	1795.81	2823.99	2728.91	2268.14
YJR094C	424	442	506	485	406	385	561	512								YJR094C	464.098	260.429	622.539	526.83	380.399	546.953	613.115	528.053								YJR094C	1083	1.083	428.53	240.47	574.829	486.455	351.246	505.035	566.126	487.583
YJR094W-A	20531	36387	24525	24553	19119	18745	23319	21360								YJR094W-A	22472.6	21439.4	30173.5	26670.6	17913.4	26630.2	25485.2	22029.7								YJR094W-A	279	0.279	80547.1	76843.8	108149	95593.7	64205.8	95448.8	91345	78959.5
YJR095W	12	21	76	81	1	5	14	11								YJR095W	13.1349	12.3733	93.5039	87.9861	0.936944	7.10328	15.3005	11.3449								YJR095W	969	0.969	13.5551	12.7692	96.4953	90.8009	0.966918	7.33053	15.79	11.7078
YJR096W	701	1200	2253	2127	664	599	923	791								YJR096W	767.294	707.047	2771.9	2310.45	622.131	850.973	1008.74	815.8								YJR096W	849	0.849	903.762	832.8	3264.9	2721.38	732.78	1002.32	1188.15	960.896
YJR097W	143	332	312	424	163	181	203	191								YJR097W	156.524	195.616	383.858	460.569	152.722	257.139	221.858	196.988								YJR097W	519	0.519	301.587	376.91	739.611	887.417	294.262	495.45	427.472	379.554
YJR098C	437	473	581	572	458	386	589	457								YJR098C	478.327	278.694	714.813	621.334	429.12	548.373	643.716	471.328								YJR098C	1971	1.971	242.683	141.397	362.665	315.238	217.717	278.221	326.594	239.132
YJR099W	733	945	1233	1245	836	720	969	969								YJR099W	802.32	556.799	1516.98	1352.38	783.285	1022.87	1059.02	999.381								YJR099W	711	0.711	1128.44	783.122	2133.58	1902.08	1101.67	1438.64	1489.47	1405.6
YJR100C	772	1281	1416	1326	750	757	1044	949								YJR100C	845.009	754.773	1742.13	1440.36	702.708	1075.44	1140.98	978.754								YJR100C	984	0.984	858.749	767.045	1770.45	1463.79	714.134	1092.92	1159.54	994.669
YJR101W	1396	2575	1938	2034	1286	1167	1759	1543								YJR101W	1528.02	1517.2	2384.35	2209.43	1204.91	1657.91	1922.4	1591.38								YJR101W	801	0.801	1907.64	1894.14	2976.72	2758.34	1504.26	2069.8	2400.01	1986.74
YJR102C	592	985	939	874	515	509	687	581								YJR102C	647.986	580.368	1155.27	949.381	482.526	723.114	750.82	599.216								YJR102C	609	0.609	1064.02	952.985	1896.99	1558.92	792.325	1187.38	1232.87	983.935
YJR103W	2620	2868	3585	3814	2638	2376	3333	2980								YJR103W	2867.78	1689.84	4410.68	4142.95	2471.66	3375.48	3642.62	3073.43								YJR103W	1737	1.737	1650.99	972.851	2539.25	2385.12	1422.95	1943.28	2097.08	1769.39
YJR104C	8985	10608	11801	10694	8147	7048	8607	8214								YJR104C	9834.72	6250.29	14518.9	11616.3	7633.28	10012.8	9406.56	8471.53								YJR104C	465	0.465	21149.9	13441.5	31223.5	24981.4	16415.7	21532.9	20229.2	18218.4
YJR105W	23707	41235	18517	18703	25321	22287	27030	26472								YJR105W	25949	24295.9	22781.7	20316.1	23724.4	31662.2	29541	27302								YJR105W	1023	1.023	25365.6	23749.7	22269.5	19859.3	23191	30950.3	28876.8	26688.2
YJR106W	1848	1473	2473	2745	1922	1805	2629	2272								YJR106W	2022.77	867.9	3042.57	2981.75	1800.81	2564.28	2873.22	2343.23								YJR106W	2178	2.178	928.727	398.485	1396.96	1369.03	826.816	1177.36	1319.2	1075.87
YJR107W	745	410	801	906	768	715	1029	872								YJR107W	815.455	241.574	985.482	984.141	719.573	1015.77	1124.59	899.34								YJR107W	987	0.987	826.196	244.756	998.462	997.103	729.05	1029.15	1139.4	911.185
YJR108W	41	20	31	35	39	39	41	33								YJR108W	44.8774	11.7841	38.1398	38.0187	36.5408	55.4056	44.8087	34.0347								YJR108W	372	0.372	120.638	31.6777	102.526	102.201	98.228	148.94	120.454	91.491
YJR109C	12719	13849	23410	26061	24142	23751	31838	27812								YJR109C	13921.8	8159.91	28801.7	28308.7	22619.7	33742	34795.6	28684								YJR109C	3357	3.357	4147.11	2430.72	8579.59	8432.74	6738.07	10051.2	10365.1	8544.53
YJR110W	558	709	1370	1408	692	639	974	820								YJR110W	610.771	417.747	1685.53	1529.44	648.365	907.799	1064.48	845.71								YJR110W	2067	2.067	295.486	202.103	815.448	739.931	313.674	439.187	514.988	409.148
YJR111C	1334	1475	2007	2134	1582	1467	1914	1674								YJR111C	1460.16	869.078	2469.24	2318.05	1482.24	2084.1	2091.8	1726.49								YJR111C	852	0.852	1713.8	1020.05	2898.17	2720.72	1739.72	2446.13	2455.17	2026.39
YJR112W	305	220	484	459	259	263	316	327								YJR112W	333.844	129.625	595.472	498.588	242.668	373.633	345.355	337.252								YJR112W	606	0.606	550.898	213.903	982.628	822.752	400.443	616.555	569.893	556.522
YJR112W-A	434	703	376	351	347	298	446	438								YJR112W-A	475.044	414.212	462.598	381.273	325.119	423.356	487.432	451.733								YJR112W-A	330	0.33	1439.53	1255.19	1401.81	1155.37	985.21	1282.9	1477.07	1368.89
YJR113C	2895	5082	4455	4425	2798	2463	3497	3114								YJR113C	3168.78	2994.34	5481.05	4806.65	2621.57	3499.08	3821.86	3211.63								YJR113C	744	0.744	4259.12	4024.66	7367.01	6460.55	3523.61	4703.06	5136.91	4316.71
YJR114W	16	26	20	33	12	15	22	11								YJR114W	17.5131	15.3193	24.6063	35.8462	11.2433	21.3098	24.0437	11.3449								YJR114W	393	0.393	44.5627	38.9805	62.6114	91.2117	28.609	54.2235	61.1799	28.8674
YJR115W	303	263	300	332	222	264	363	330								YJR115W	331.655	154.961	369.094	360.634	208.001	375.053	396.721	340.347								YJR115W	510	0.51	650.304	303.845	723.715	707.126	407.846	735.399	777.885	667.346
YJR116W	1807	2216	1731	1751	1959	1946	2422	2237								YJR116W	1977.89	1305.68	2129.68	1902.02	1835.47	2764.6	2646.99	2307.14								YJR116W	840	0.84	2354.63	1554.38	2535.33	2264.31	2185.09	3291.19	3151.18	2746.59
YJR117W	13972	14120	15452	16161	14125	12619	19061	17091								YJR117W	15293.3	8319.59	19010.8	17554.9	13234.3	17927.3	20831.7	17626.9								YJR117W	1362	1.362	11228.6	6108.36	13958	12889	9716.84	13162.5	15294.9	12941.9
YJR118C	508	944	535	542	491	533	590	513								YJR118C	556.042	556.21	658.219	588.746	460.039	757.21	644.809	529.084								YJR118C	612	0.612	908.565	908.84	1075.52	962.004	751.698	1237.27	1053.61	864.517
YJR119C	465	703	1166	1327	571	495	707	625								YJR119C	508.975	414.212	1434.55	1441.45	534.995	703.225	772.678	644.596								YJR119C	2187	2.187	232.728	189.397	655.943	659.1	244.625	321.548	353.305	294.74
YJR120W	199	116	236	245	119	125	153	88								YJR120W	217.82	68.3479	290.354	266.131	111.496	177.582	167.213	90.7591								YJR120W	351	0.351	620.569	194.723	827.22	758.207	317.653	505.932	476.391	258.573
YJR121W	86229	88165	126117	129156	70104	67215	104266	89039								YJR121W	94383.8	51947.3	155164	140295	65683.5	95489.4	113952	91830.7								YJR121W	1536	1.536	61447.8	33819.9	101018	91338.2	42762.7	62167.6	74187.4	59785.6
YJR122W	1119	1240	1226	1324	934	968	1451	1275								YJR122W	1224.82	730.615	1508.37	1438.19	875.105	1375.2	1585.79	1314.98								YJR122W	1494	1.494	819.829	489.033	1009.62	962.646	585.747	920.479	1061.44	880.171
YJR123W	101987	134489	92779	91446	106443	97978	110303	97530								YJR123W	111632	79241.7	114147	99333	99731.1	139193	120550	100588								YJR123W	678	0.678	164649	116876	168359	146509	147096	205300	177802	148360
YJR124C	1809	1785	1448	1403	2102	2054	2316	2261								YJR124C	1980.08	1051.73	1781.5	1524.01	1969.46	2918.03	2531.15	2331.89								YJR124C	1347	1.347	1469.99	780.796	1322.57	1131.41	1462.11	2166.32	1879.1	1731.17
YJR126C	2335	1524	3153	3064	2550	2344	3103	2710								YJR126C	2555.82	897.95	3879.18	3328.26	2389.21	3330.02	3391.26	2794.97								YJR126C	2436	2.436	1049.19	368.616	1592.44	1366.28	980.791	1367	1392.14	1147.36
YJR127C	2765	1504	5289	5504	2536	2627	3927	3383								YJR127C	3026.49	886.165	6507.14	5978.71	2376.09	3732.06	4291.8	3489.07								YJR127C	4143	4.143	730.507	213.895	1570.63	1443.09	573.519	900.812	1035.92	842.16
YJR128W	7	3	33	37	11	9	9	9								YJR128W	7.662	1.76762	40.6004	40.1912	10.3064	12.7859	9.83607	9.28218								YJR128W	360	0.36	21.2833	4.91005	112.779	111.642	28.6288	35.5164	27.3224	25.7838
YJR129C	707	714	782	795	776	750	855	788								YJR129C	773.862	420.693	962.106	863.567	727.068	1065.49	934.426	812.706								YJR129C	1020	1.02	758.688	412.444	943.241	846.635	712.812	1044.6	916.104	796.771
YJR130C	705	517	1814	2073	1010	892	1425	1186								YJR130C	771.673	304.619	2231.79	2251.79	946.313	1267.23	1557.38	1223.18								YJR130C	1920	1.92	401.913	158.656	1162.39	1172.81	492.871	660.013	811.134	637.075
YJR131W	1510	1323	1695	1726	1379	1372	1758	1543								YJR131W	1652.8	779.519	2085.38	1874.86	1292.05	1949.14	1921.31	1591.38								YJR131W	1650	1.65	1001.7	472.436	1263.87	1136.28	783.058	1181.3	1164.43	964.471
YJR132W	4473	5605	5336	5530	5529	5095	6785	6335								YJR132W	4896.02	3302.5	6564.96	6006.95	5180.36	7238.24	7415.3	6533.62								YJR132W	3147	3.147	1555.77	1049.41	2086.1	1908.79	1646.13	2300.05	2356.31	2076.14
YJR133W	1515	1972	2414	2412	1675	1576	1935	1749								YJR133W	1658.27	1161.91	2969.98	2620.03	1569.38	2238.95	2114.75	1803.84								YJR133W	630	0.63	2632.18	1844.31	4714.25	4158.78	2491.08	3553.9	3356.75	2863.23
YJR134C	597	636	1086	1394	803	720	1117	920								YJR134C	653.459	374.735	1336.12	1514.23	752.366	1022.87	1220.77	948.845								YJR134C	2124	2.124	307.655	176.429	629.059	712.914	354.221	481.578	574.748	446.725
YJR135C	229	443	366	366	223	200	290	251								YJR135C	250.657	261.018	450.295	397.567	208.938	284.131	316.94	258.87								YJR135C	720	0.72	348.134	362.525	625.41	552.176	290.192	394.627	440.194	359.541
YJR135W-A	1924	3880	2788	2583	1900	1641	2165	2175								YJR135W-A	2105.95	2286.12	3430.12	2805.78	1780.19	2331.3	2366.12	2243.19								YJR135W-A	264	0.264	7977.1	8659.54	12992.9	10628	6743.16	8830.67	8962.58	8496.94
YJR136C	543	1075	1008	1021	548	507	772	689								YJR136C	594.352	633.396	1240.16	1109.06	513.445	720.273	843.716	710.602								YJR136C	1266	1.266	469.472	500.313	979.587	876.034	405.565	568.936	666.442	561.297
YJR137C	10365	10212	7738	8270	18308	15821	20634	18589								YJR137C	11345.2	6016.97	9520.18	8983.27	17153.6	22476.2	22550.8	19171.8								YJR137C	4329	4.329	2620.75	1389.92	2199.16	2075.14	3962.48	5192.01	5209.24	4428.7
YJR138W	1974	1518	3937	4257	2198	2035	3598	2923								YJR138W	2160.68	894.414	4843.75	4624.16	2059.4	2891.04	3932.24	3014.65								YJR138W	4755	4.755	454.402	188.1	1018.66	972.483	433.102	607.999	826.97	633.995
YJR139C	23831	42632	21893	21510	26591	23633	30258	28285								YJR139C	26084.7	25119	26935.3	23365.2	24914.3	33574.4	33068.9	29171.8								YJR139C	1080	1.08	24152.5	23258.4	24940.1	21634.4	23068.8	31087.4	30619.3	27010.9
YJR140C	1983	2369	3298	3757	2559	2460	3833	3299								YJR140C	2170.53	1395.83	4057.58	4081.03	2397.64	3494.81	4189.07	3402.43								YJR140C	4947	4.947	438.758	282.157	820.21	824.951	484.665	706.451	846.79	687.777
YJR140W-A	0	0	1	0	0	0	0	0								YJR140W-A	0	0	1.23031	0	0	0	0	0								YJR140W-A	150	0.15	0	0	8.2021	0	0	0	0	0
YJR141W	479	1292	659	664	557	431	701	653								YJR141W	524.299	761.254	810.778	721.269	521.878	612.303	766.12	673.474								YJR141W	1044	1.044	502.203	729.17	776.607	690.87	499.883	586.497	733.832	645.09
YJR142W	1083	1596	1936	2170	1058	1022	1478	1366								YJR142W	1185.42	940.372	2381.89	2357.16	991.286	1451.91	1615.3	1408.83								YJR142W	1029	1.029	1152.01	913.87	2314.76	2290.73	963.349	1410.99	1569.78	1369.12
YJR143C	22262	26622	19748	20078	22985	21623	28596	26511								YJR143C	24367.3	15685.8	24296.3	21809.7	21535.7	30718.9	31252.5	27342.2								YJR143C	2289	2.289	10645.4	6852.7	10614.4	9528.04	9408.32	13420.2	13653.3	11945
YJR144W	2432	3345	2963	2863	1982	1787	2615	2375								YJR144W	2662	1970.89	3645.42	3109.93	1857.02	2538.71	2857.92	2449.46								YJR144W	810	0.81	3286.42	2433.2	4500.52	3839.42	2292.62	3134.21	3528.3	3024.03
YJR145C	106871	144774	99529	98782	108718	98589	126706	118756								YJR145C	116978	85301.7	122452	107302	101863	140061	138477	122479								YJR145C	786	0.786	148827	108526	155791	136516	129596	178195	176179	155826
YJR146W	20	11	29	32	21	18	17	21								YJR146W	21.8914	6.48126	35.6791	34.7599	19.6758	25.5718	18.5792	21.6584								YJR146W	354	0.354	61.8402	18.3087	100.789	98.1919	55.5814	72.2368	52.4837	61.182
YJR147W	4795	4429	2835	3247	3994	4630	5272	4961								YJR147W	5248.47	2609.59	3487.94	3527.05	3742.15	6577.64	5761.75	5116.54								YJR147W	1077	1.077	4873.23	2423.02	3238.57	3274.88	3474.61	6107.37	5349.81	4750.74
YJR148W	8792	7931	10919	11448	10444	8291	11146	11026								YJR148W	9623.47	4672.99	13433.8	12435.4	9785.44	11778.7	12181.4	11371.7								YJR148W	1131	1.131	8508.81	4131.73	11877.8	10995	8652.02	10414.4	10770.5	10054.6
YJR149W	535	427	599	595	577	473	748	679								YJR149W	585.595	251.591	736.959	646.318	540.617	671.97	817.486	700.289								YJR149W	1215	1.215	481.972	207.071	606.55	531.949	444.952	553.062	672.828	576.369
YJR150C	10	2	25	23	2	3	8	7								YJR150C	10.9457	1.17841	30.7579	24.9837	1.87389	4.26197	8.74317	7.21947								YJR150C	897	0.897	12.2026	1.31373	34.2897	27.8525	2.08906	4.75136	9.74712	8.04846
YJR151C	1132	311	1804	2120	923	1117	1658	1327								YJR151C	1239.05	183.243	2219.49	2302.85	864.799	1586.87	1812.02	1368.61								YJR151C	3486	3.486	355.437	52.5654	636.686	660.598	248.078	455.213	519.8	392.601
YJR151W-A	0	0	0	0	0	0	0	0								YJR151W-A	0	0	0	0	0	0	0	0								YJR151W-A	51	0.051	0	0	0	0	0	0	0	0
YJR152W	173	93	382	383	208	234	276	246								YJR152W	189.361	54.7961	469.98	416.033	194.884	332.434	301.639	253.713								YJR152W	1632	1.632	116.03	33.5761	287.978	254.922	119.414	203.697	184.828	155.461
YJR153W	88	61	133	126	131	125	191	205								YJR153W	96.3222	35.9416	163.632	136.867	122.74	177.582	208.743	211.427								YJR153W	1086	1.086	88.6945	33.0954	150.674	126.029	113.02	163.519	192.213	194.685
YJR154W	138	53	213	215	154	164	210	163								YJR154W	151.051	31.2279	262.057	233.543	144.289	232.988	229.508	168.111								YJR154W	1041	1.041	145.102	29.998	251.736	224.345	138.606	223.811	220.469	161.489
YJR155W	177	125	303	325	217	168	263	241								YJR155W	193.739	73.6507	372.785	353.031	203.317	238.67	287.432	248.556								YJR155W	867	0.867	223.459	84.9489	429.972	407.186	234.506	275.283	331.524	286.685
YJR156C	172	306	317	329	178	156	230	158								YJR156C	188.266	180.297	390.01	357.376	166.776	221.622	251.366	162.954								YJR156C	1023	1.023	184.033	176.243	381.241	349.341	163.026	216.64	245.715	159.29
YJR157W	1	4	3	3	3	1	1	2								YJR157W	1.09457	2.35682	3.69094	3.25874	2.81083	1.42066	1.0929	2.06271								YJR157W	363	0.363	3.01535	6.49263	10.1679	8.97726	7.74334	3.91365	3.01073	5.68239
YJR158W	1	0	4	1	2	2	4	1								YJR158W	1.09457	0	4.92126	1.08625	1.87389	2.84131	4.37158	1.03135								YJR158W	1704	1.704	0.642354	0	2.88806	0.63747	1.0997	1.66744	2.56548	0.605254
YJR159W	96	113	129	110	67	73	105	81								YJR159W	105.079	66.5802	158.711	119.487	62.7752	103.708	114.754	83.5396								YJR159W	1074	1.074	97.8387	61.9928	147.775	111.254	58.4499	96.5623	106.847	77.7836
YJR160C	89	59	74	88	71	84	95	111								YJR160C	97.4168	34.7631	91.0433	95.5898	66.523	119.335	103.825	114.48								YJR160C	1809	1.809	53.8512	19.2168	50.328	52.8413	36.7734	65.9675	57.3937	63.2837
YJR161C	745	1131	1658	1581	886	847	1082	1043								YJR161C	815.455	666.392	2039.86	1717.36	830.132	1203.3	1182.51	1075.7								YJR161C	1152	1.152	707.861	578.465	1770.71	1490.76	720.601	1044.53	1026.49	933.769
YJR162C	5	3	3	2	1	3	7	2								YJR162C	5.47285	1.76762	3.69094	2.1725	0.936944	4.26197	7.65027	2.06271								YJR162C	351	0.351	15.5922	5.03595	10.5155	6.18945	2.66936	12.1424	21.7957	5.87666
YBL047C	18427	13726	29406	32805	19850	20476	30084	25310								YBL047C	20169.7	8087.44	36178.6	35634.4	18598.3	29089.4	32878.7	26103.5								YBL047C	4146	4.146	4864.85	1950.66	8726.16	8594.88	4485.85	7016.25	7930.22	6296.08
YBR012W-B	9799	6072	13422	15542	16088	17673	26356	20665								YBR012W-B	10725.7	3577.66	16513.3	16882.5	15073.6	25107.3	28804.4	21312.9								YBR012W-B	5271	5.271	2034.85	678.744	3132.86	3202.9	2859.71	4763.28	5464.69	4043.43
YBR078W	109756	131753	135283	140225	116206	110094	150675	135186								YBR078W	120136	77629.6	166441	152319	108878	156406	164672	139425								YBR078W	1290	1.29	93128.5	60178	129024	118077	84401.9	121245	127653	108081
YBR140C	8246	7322	17774	19927	9192	9126	15530	13060								YBR140C	9025.83	4314.16	21867.6	21645.7	8612.39	12964.9	16972.7	13469.5								YBR140C	9279	9.279	972.716	464.939	2356.68	2332.76	928.159	1397.23	1829.15	1451.61
YBL113C	1796	541	2191	2170	1742	1951	2607	2282								YBL113C	1965.85	318.76	2695.62	2357.16	1632.16	2771.7	2849.18	2353.55								YBL113C	2379	2.379	826.334	133.989	1133.09	990.819	686.068	1165.07	1197.64	989.301
YBL113W-A	25	13	39	41	18	28	30	32								YBL113W-A	27.3643	7.65967	47.9823	44.5362	16.865	39.7784	32.7869	33.0033								YBL113W-A	483	0.483	56.6548	15.8585	99.3422	92.2074	34.9172	82.3569	67.8817	68.3298
YBL112C	9	10	13	16	9	15	15	16								YBL112C	9.85114	5.89206	15.9941	17.38	8.43249	21.3098	16.3934	16.5017								YBL112C	318	0.318	30.9784	18.5285	50.2959	54.654	26.5173	67.0121	51.5517	51.892
YBL111C	590	358	755	739	603	657	798	714								YBL111C	645.797	210.936	928.888	802.737	564.977	933.371	872.131	736.386								YBL111C	2004	2.004	322.254	105.257	463.517	400.568	281.925	465.754	435.195	367.458
YBL109W	51	36	44	46	29	56	58	46								YBL109W	55.8231	21.2114	54.1339	49.9674	27.1714	79.5568	63.388	47.4422								YBL109W	336	0.336	166.14	63.1292	161.113	148.713	80.8672	236.776	188.655	141.197
YBL108C-A	22	17	21	17	16	18	25	20								YBL108C-A	24.0806	10.0165	25.8366	18.4662	14.9911	25.5718	27.3224	20.6271								YBL108C-A	129	0.129	186.671	77.6473	200.284	143.149	116.21	198.231	211.802	159.9
YBL108W	0	0	0	0	0	0	0	0								YBL108W	0	0	0	0	0	0	0	0								YBL108W	306	0.306	0	0	0	0	0	0	0	0
YBL107W-A	0	0	3	1	1	1	0	1								YBL107W-A	0	0	3.69094	1.08625	0.936944	1.42066	0	1.03135								YBL107W-A	105	0.105	0	0	35.1519	10.3452	8.92327	13.5301	0	9.82241
YBL107C	343	526	469	439	389	393	504	479								YBL107C	375.438	309.922	577.018	476.863	364.471	558.318	550.82	494.018								YBL107C	591	0.591	635.259	524.403	976.341	806.875	616.702	944.7	932.013	835.902
YBL106C	1118	764	1575	1741	1118	1180	1544	1462								YBL106C	1223.73	450.153	1937.75	1891.16	1047.5	1676.37	1687.43	1507.84								YBL106C	3033	3.033	403.472	148.418	638.888	623.527	345.369	552.712	556.357	497.144
YBL105C	4147	3057	7989	8464	4921	4771	7146	6437								YBL105C	4539.19	1801.2	9828.99	9194	4610.7	6777.95	7809.84	6638.82								YBL105C	3456	3.456	1313.42	521.181	2844.04	2660.3	1334.11	1961.21	2259.79	1920.95
YBL104C	2040	1747	2863	2911	2244	2243	3121	2851								YBL104C	2232.92	1029.34	3522.39	3162.07	2102.5	3186.53	3410.93	2940.39								YBL104C	3117	3.117	716.37	330.235	1130.06	1014.46	674.527	1022.31	1094.3	943.339
YBL103C	1457	931	2525	2818	1450	1394	2008	1801								YBL103C	1594.79	548.551	3106.55	3061.05	1358.57	1980.39	2194.54	1857.47								YBL103C	1461	1.461	1091.57	375.462	2126.31	2095.17	929.889	1355.51	1502.08	1271.37
YBL102W	2470	4566	3567	3525	2326	2109	2892	2606								YBL102W	2703.59	2690.31	4388.53	3829.02	2179.33	2996.16	3160.66	2687.71								YBL102W	648	0.648	4172.21	4151.72	6772.43	5908.99	3363.17	4623.71	4877.56	4147.69
YBL101C	4795	2461	10904	11238	4754	4424	7045	6370								YBL101C	5248.47	1450.04	13415.4	12207.3	4454.23	6284.98	7699.45	6569.72								YBL101C	3354	3.354	1564.84	432.33	3999.81	3639.61	1328.04	1873.88	2295.6	1958.77
YBL100W-C	0	2	0	2	0	1	0	1								YBL100W-C	0	1.17841	0	2.1725	0	1.42066	0	1.03135								YBL100W-C	120	0.12	0	9.8201	0	18.1041	0	11.8388	0	8.59461
YBL100W-B	4905	3649	14469	17517	7864	8957	15746	12111								YBL100W-B	5368.87	2150.01	17801.4	19027.8	7368.13	12724.8	17208.7	12490.7								YBL100W-B	5313	5.313	1010.52	404.67	3350.54	3581.37	1386.81	2395.03	3238.99	2350.97
YBL100W-A	0	0	0	0	0	0	0	0								YBL100W-A	0	0	0	0	0	0	0	0								YBL100W-A	1317	1.317	0	0	0	0	0	0	0	0
YBL100C	0	1	1	0	0	0	0	0								YBL100C	0	0.589206	1.23031	0	0	0	0	0								YBL100C	315	0.315	0	1.87049	3.90576	0	0	0	0	0
YBL099W	29164	26215	40775	41010	23654	23656	34949	29343								YBL099W	31922.1	15446	50166.1	44547	22162.5	33607	38195.6	30263								YBL099W	1638	1.638	19488.4	9429.81	30626.4	27196	13530.2	20517.1	23318.5	18475.6
YBL098W	1269	2156	644	718	1230	1214	1305	1199								YBL098W	1389.01	1270.33	792.323	779.926	1152.44	1724.68	1426.23	1236.59								YBL098W	1383	1.383	1004.35	918.53	572.902	563.938	833.29	1247.05	1031.26	894.138
YBL097W	403	324	829	920	479	502	762	633								YBL097W	441.112	190.903	1019.93	999.348	448.796	713.169	832.787	652.847								YBL097W	2265	2.265	194.751	84.2837	450.301	441.213	198.144	314.865	367.676	288.232
YBL096C	10	10	26	38	16	18	12	28								YBL096C	10.9457	5.89206	31.9882	41.2774	14.9911	25.5718	13.1148	28.8779								YBL096C	309	0.309	35.423	19.0681	103.522	133.584	48.5149	82.7567	42.4426	93.4559
YBL095W	504	578	528	546	475	422	515	546								YBL095W	551.664	340.561	649.606	593.091	445.048	599.517	562.842	563.119								YBL095W	813	0.813	678.553	418.894	799.024	729.51	547.415	737.413	692.302	692.643
YBL094C	31	22	29	28	13	18	34	23								YBL094C	33.9317	12.9625	35.6791	30.4149	12.1803	25.5718	37.1585	23.7211								YBL094C	333	0.333	101.897	38.9265	107.145	91.3362	36.5774	76.7922	111.587	71.2346
YBL093C	1523	2404	2027	2032	1685	1619	1872	1761								YBL093C	1667.03	1416.45	2493.85	2207.26	1578.75	2300.04	2045.9	1816.21								YBL093C	663	0.663	2514.38	2136.43	3761.46	3329.19	2381.22	3469.14	3085.82	2739.39
YBL092W	136035	236468	120339	120754	138914	128083	167692	158856								YBL092W	148900	139328	148055	131169	130155	181962	183270	163837								YBL092W	393	0.393	378880	354525	376730	333763	331182	463007	466336	416887
YBL091C-A	170	177	339	359	131	114	156	162								YBL091C-A	186.077	104.289	417.077	389.963	122.74	161.955	170.492	167.079								YBL091C-A	528	0.528	352.419	197.518	789.918	738.566	232.461	306.733	322.901	316.438
YBL091C	5580	3403	6608	7044	5382	5140	6604	5916								YBL091C	6107.71	2005.07	8129.92	7651.53	5042.63	7302.17	7217.49	6101.49								YBL091C	1266	1.266	4824.41	1583.78	6421.74	6043.86	3983.12	5767.91	5701.02	4819.5
YBL090W	729	1364	1353	1208	787	640	887	697								YBL090W	797.942	803.677	1664.62	1312.19	737.375	909.22	969.399	718.853								YBL090W	534	0.534	1494.27	1505.01	3117.26	2457.28	1380.85	1702.66	1815.35	1346.17
YBL089W	1306	2111	1789	1746	1282	1199	1731	1683								YBL089W	1429.51	1243.81	2201.03	1896.59	1201.16	1703.37	1891.8	1735.77								YBL089W	1380	1.38	1035.88	901.314	1594.95	1374.34	870.407	1234.32	1370.87	1257.8
YBL088C	1878	1594	2881	3159	1997	1969	3056	2746								YBL088C	2055.6	939.194	3544.54	3431.46	1871.08	2797.27	3339.89	2832.1								YBL088C	8364	8.364	245.768	112.29	423.785	410.265	223.706	334.442	399.317	338.605
YBL087C	24953	39975	20061	20250	25354	22493	27089	25526								YBL087C	27312.8	23553.5	24681.3	21996.5	23755.3	31954.8	29605.5	26326.3								YBL087C	414	0.414	65973	56892.5	59616.8	53131.7	57379.9	77185.6	71510.8	63590.1
YBL086C	685	527	1409	1433	691	728	1087	938								YBL086C	749.781	310.511	1733.51	1556.59	647.428	1034.24	1187.98	967.409								YBL086C	1401	1.401	535.176	221.636	1237.34	1111.06	462.119	738.214	847.95	690.513
YBL085W	4803	2557	7430	8256	5200	4958	7661	6442								YBL085W	5257.22	1506.6	9141.24	8968.06	4872.11	7043.61	8372.68	6643.98								YBL085W	2943	2.943	1786.35	511.926	3106.1	3047.25	1655.49	2393.34	2844.95	2257.55
YBL084C	1950	1648	3608	3685	1673	1655	2575	2262								YBL084C	2134.41	971.011	4438.98	4002.82	1567.51	2351.19	2814.21	2332.92								YBL084C	2277	2.277	937.38	426.443	1949.48	1757.94	688.409	1032.58	1235.93	1024.56
YBL083C	1	0	1	2	0	0	1	0								YBL083C	1.09457	0	1.23031	2.1725	0	0	1.0929	0								YBL083C	426	0.426	2.56942	0	2.88806	5.09976	0	0	2.56548	0
YBL082C	1389	1785	1317	1331	1396	1450	1657	1594								YBL082C	1520.36	1051.73	1620.32	1445.8	1307.97	2059.95	1810.93	1643.98								YBL082C	1377	1.377	1104.11	763.785	1176.71	1049.96	949.872	1495.97	1315.13	1193.88
YBL081W	5527	3391	7150	8296	5179	5840	7611	6869								YBL081W	6049.69	1998	8796.75	9011.51	4852.43	8296.63	8318.03	7084.36								YBL081W	1107	1.107	5464.94	1804.88	7946.48	8140.48	4383.41	7494.7	7514.03	6399.61
YBL080C	540	479	1135	1192	531	517	839	769								YBL080C	591.068	282.23	1396.41	1294.81	497.517	734.479	916.94	793.111								YBL080C	1626	1.626	363.511	173.573	858.799	796.315	305.976	451.709	563.924	487.768
YBL079W	9392	10779	14660	15424	11125	11174	16477	14663								YBL079W	10280.2	6351.05	18036.4	16754.3	10423.5	15874.4	18007.7	15122.7								YBL079W	4509	4.509	2279.93	1408.53	4000.09	3715.74	2311.71	3520.61	3993.71	3353.9
YBL078C	139	180	636	678	142	93	187	166								YBL078C	152.145	106.057	782.48	736.476	133.046	132.121	204.372	171.205								YBL078C	354	0.354	429.789	299.596	2210.4	2080.44	375.836	373.223	577.321	483.629
YBL077W	0	3	0	1	0	0	0	1								YBL077W	0	1.76762	0	1.08625	0	0	0	1.03135								YBL077W	432	0.432	0	4.09171	0	2.51446	0	0	0	2.38739
YBL076C	50263	66053	50703	52642	63399	56485	69845	66290								YBL076C	55016.4	38918.8	62380.7	57182.3	59401.3	80245.8	76333.3	68368.4								YBL076C	3219	3.219	17091.2	12090.3	19378.9	17764	18453.3	24928.8	23713.4	21239
YBL075C	448	230	1158	1314	432	470	641	573								YBL075C	490.368	135.517	1424.7	1427.33	404.76	667.708	700.546	590.965								YBL075C	1950	1.95	251.471	69.4961	730.618	731.964	207.569	342.415	359.255	303.059
YBL074C	379	313	466	502	409	402	560	491								YBL074C	414.842	184.421	573.327	545.297	383.21	571.104	612.022	506.394								YBL074C	1068	1.068	388.429	172.679	536.823	510.577	358.811	534.741	573.054	474.152
YBL073W	1	1	0	0	0	1	2	0								YBL073W	1.09457	0.589206	0	0	0	1.42066	2.18579	0								YBL073W	312	0.312	3.50824	1.88848	0	0	0	4.55339	7.00574	0
YBL072C	75669	146966	63293	59659	80527	74520	87681	85455								YBL072C	82825.1	86593.2	77870.3	64804.5	75449.3	105867	95826.2	88134.3								YBL072C	603	0.603	137355	143604	129138	107470	125123	175568	158916	146160
YBL071C-B	13	14	4	4	5	10	11	10								YBL071C-B	14.2294	8.24888	4.92126	4.34499	4.68472	14.2066	12.0219	10.3135								YBL071C-B	99	0.099	143.732	83.322	49.7097	43.8888	47.3204	143.501	121.433	104.177
YBL071W-A	541	671	469	493	567	541	530	551								YBL071W-A	592.163	395.357	577.018	535.52	531.247	768.575	579.235	568.276								YBL071W-A	249	0.249	2378.16	1587.78	2317.34	2150.68	2133.52	3086.65	2326.24	2282.23
YBL071C	6	4	7	6	6	9	4	10								YBL071C	6.56743	2.35682	8.6122	6.51749	5.62166	12.7859	4.37158	10.3135								YBL071C	309	0.309	21.2538	7.62726	27.8712	21.0922	18.1931	41.3783	14.1475	33.3771
YBL070C	3	3	0	1	0	1	0	0								YBL070C	3.28371	1.76762	0	1.08625	0	1.42066	0	0								YBL070C	321	0.321	10.2296	5.5066	0	3.38395	0	4.42572	0	0
YBL069W	920	805	1183	1172	813	844	997	1065								YBL069W	1007.01	474.311	1455.46	1273.08	761.735	1199.03	1089.62	1098.39								YBL069W	1290	1.29	780.624	367.683	1128.27	986.886	590.492	929.484	844.665	851.466
YBL068W-A	0	0	0	0	0	0	0	0								YBL068W-A	0	0	0	0	0	0	0	0								YBL068W-A	237	0.237	0	0	0	0	0	0	0	0
YBL068W	3896	4955	4612	4650	4512	4168	4812	4836								YBL068W	4264.45	2919.51	5674.21	5051.05	4227.49	5921.3	5259.02	4987.62								YBL068W	981	0.981	4347.04	2976.06	5784.11	5148.88	4309.37	6035.98	5360.87	5084.22
YBL067C	3165	3468	4194	4288	3497	3522	4803	4210								YBL067C	3464.32	2043.37	5159.94	4657.83	3276.49	5003.55	5249.18	4342								YBL067C	2244	2.244	1543.81	910.591	2299.44	2075.68	1460.11	2229.75	2339.21	1934.94
YBL066C	3498	1787	5611	5908	2803	3111	4494	3746								YBL066C	3828.81	1052.91	6903.3	6417.55	2626.25	4419.66	4911.48	3863.45								YBL066C	3447	3.447	1110.77	305.457	2002.7	1861.78	761.895	1282.18	1424.86	1120.81
YBL065W	1	3	10	2	5	1	1	2								YBL065W	1.09457	1.76762	12.3031	2.1725	4.68472	1.42066	1.0929	2.06271								YBL065W	345	0.345	3.17267	5.12353	35.6613	6.29709	13.5789	4.11784	3.16781	5.97886
YBL064C	1335	1657	4108	4000	955	895	1528	1192								YBL064C	1461.25	976.314	5054.13	4344.99	894.781	1271.49	1669.95	1229.37								YBL064C	786	0.786	1859.1	1242.13	6430.2	5527.98	1138.4	1617.67	2124.61	1564.09
YBL063W	918	1071	2583	2783	906	930	1543	1273								YBL063W	1004.82	631.039	3177.9	3023.03	848.871	1321.21	1686.34	1312.91								YBL063W	3336	3.336	301.204	189.16	952.609	906.184	254.458	396.046	505.497	393.559
YBL062W	2	0	0	0	1	3	3	2								YBL062W	2.18914	0	0	0	0.936944	4.26197	3.27869	2.06271								YBL062W	381	0.381	5.74578	0	0	0	2.45917	11.1863	8.60548	5.41393
YBL061C	2802	2176	6614	7327	3395	3257	4336	4136								YBL061C	3066.99	1282.11	8137.3	7958.94	3180.92	4627.08	4738.8	4265.68								YBL061C	2091	2.091	1466.76	613.157	3891.58	3806.28	1521.25	2212.85	2266.28	2040.02
YBL060W	726	874	1175	1310	789	781	1158	1100								YBL060W	794.658	514.966	1445.62	1422.99	739.249	1109.53	1265.57	1134.49								YBL060W	2064	2.064	385.009	249.499	700.397	689.431	358.163	537.564	613.166	549.655
YBL059C-A	1099	1615	1862	1851	988	908	1305	1187								YBL059C-A	1202.93	951.567	2290.85	2010.65	925.7	1289.96	1426.23	1224.22								YBL059C-A	330	0.33	3645.25	2883.54	6941.96	6092.86	2805.15	3908.96	4321.91	3709.75
YBL059W	288	310	627	641	245	237	386	315								YBL059W	315.236	182.654	771.407	696.285	229.551	336.696	421.858	324.876								YBL059W	582	0.582	541.643	313.838	1325.44	1196.37	394.418	578.515	724.842	558.207
YBL058W	6343	5547	8840	9057	6081	5426	7600	6624								YBL058W	6942.86	3268.32	10876	9838.15	5697.55	7708.48	8306.01	6831.68								YBL058W	1272	1.272	5458.23	2569.44	8550.3	7734.39	4479.21	6060.13	6529.88	5370.82
YBL057C	1587	2063	1887	1725	1572	1413	1641	1612								YBL057C	1737.08	1215.53	2321.6	1873.78	1472.88	2007.39	1793.44	1662.54								YBL057C	627	0.627	2770.47	1938.65	3702.72	2988.48	2349.08	3201.57	2860.36	2651.58
YBL056W	3671	3657	6285	6559	4000	3900	5518	5043								YBL056W	4018.17	2154.73	7732.53	7124.7	3747.77	5540.56	6030.6	5201.11								YBL056W	1407	1.407	2855.84	1531.43	5495.76	5063.75	2663.66	3937.85	4286.14	3696.6
YBL055C	1154	1648	1674	1670	1187	1262	1313	1326								YBL055C	1263.13	971.011	2059.55	1814.03	1112.15	1792.87	1434.97	1367.57								YBL055C	1257	1.257	1004.88	772.483	1638.46	1443.15	884.767	1426.31	1141.59	1087.97
YBL054W	5070	3515	6197	7930	5317	5986	6496	6292								YBL054W	5549.47	2071.06	7624.26	8613.95	4981.73	8504.05	7099.45	6489.27								YBL054W	1578	1.578	3516.78	1312.46	4831.6	5458.78	3156.99	5389.13	4499.02	4112.34
YBL053W	69	63	60	68	61	73	107	82								YBL053W	75.5254	37.12	73.8189	73.8649	57.1536	103.708	116.94	84.571								YBL053W	375	0.375	201.401	98.9866	196.85	196.973	152.41	276.554	311.84	225.523
YBL052C	912	978	1904	2085	1138	1079	1996	1779								YBL052C	998.249	576.243	2342.52	2264.83	1066.24	1532.89	2181.42	1834.78								YBL052C	2496	2.496	399.939	230.867	938.509	907.383	427.18	614.138	873.967	735.087
YBL051C	7251	3812	13018	14861	8361	8145	12092	10701								YBL051C	7936.73	2246.05	16016.2	16142.7	7833.79	11571.2	13215.3	11036.5								YBL051C	2007	2.007	3954.53	1119.11	7980.19	8043.22	3903.23	5765.44	6584.6	5499.01
YBL050W	1248	1696	2173	2210	1319	1155	1508	1326								YBL050W	1366.02	999.293	2673.47	2400.61	1235.83	1640.86	1648.09	1367.57								YBL050W	879	0.879	1554.07	1136.85	3041.5	2731.07	1405.95	1866.73	1874.96	1555.83
YBL049W	28	32	439	464	22	30	28	34								YBL049W	30.648	18.8546	540.108	504.019	20.6128	42.6197	30.6011	35.066								YBL049W	417	0.417	73.4964	45.2148	1295.22	1208.68	49.4311	102.205	73.3839	84.0911
YBL048W	2	0	27	37	1	0	2	3								YBL048W	2.18914	0	33.2185	40.1912	0.936944	0	2.18579	3.09406								YBL048W	312	0.312	7.01648	0	106.47	128.818	3.00302	0	7.00574	9.91686
YBL046W	543	421	953	1017	571	530	846	761								YBL046W	594.352	248.056	1172.49	1104.71	534.995	752.948	924.59	784.86								YBL046W	1326	1.326	448.229	187.071	884.231	833.118	403.465	567.834	697.278	591.9
YBL045C	19609	21329	30476	30979	17117	15094	24613	20227								YBL045C	21463.4	12567.2	37495.1	33650.9	16037.7	21443.4	26899.5	20861.2								YBL045C	1374	1.374	15621.1	9146.41	27289	24491.2	11672.2	15606.5	19577.5	15182.8
YBL044W	3	6	2	5	0	2	1	2								YBL044W	3.28371	3.53523	2.46063	5.43124	0	2.84131	1.0929	2.06271								YBL044W	369	0.369	8.89895	9.58058	6.66837	14.7188	0	7.70003	2.96178	5.58999
YBL043W	64	58	633	681	40	43	81	52								YBL043W	70.0525	34.1739	778.789	739.735	37.4777	61.0882	88.5246	53.6304								YBL043W	774	0.774	90.5072	44.1524	1006.19	955.73	48.4209	78.9254	114.373	69.2899
YBL042C	5784	6579	7867	8467	6976	6523	7876	7387								YBL042C	6331	3876.38	9678.89	9197.26	6536.12	9266.94	8607.65	7618.61								YBL042C	1920	1.92	3297.39	2018.95	5041.09	4790.24	3404.23	4826.53	4483.15	3968.02
YBL041W	2470	2674	4995	4827	2293	2158	2825	2622								YBL041W	2703.59	1575.54	6145.42	5243.32	2148.41	3065.78	3087.43	2704.21								YBL041W	726	0.726	3723.95	2170.16	8464.77	7222.2	2959.25	4222.83	4252.66	3724.8
YBL040C	3203	7384	5513	5634	3592	2989	4630	4173								YBL040C	3505.91	4350.7	6782.73	6119.92	3365.5	4246.34	5060.11	4303.84								YBL040C	660	0.66	5311.99	6591.96	10276.9	9272.61	5099.25	6433.85	7666.83	6520.96
YBL039W-B	119	258	213	202	132	82	137	107								YBL039W-B	130.254	152.015	262.057	219.422	123.677	116.494	149.727	110.355								YBL039W-B	180	0.18	723.633	844.528	1455.87	1219.01	687.092	647.188	831.815	613.082
YBL039C	7695	9087	6971	7003	9196	8629	9630	9857								YBL039C	8422.72	5354.11	8576.53	7607	8616.13	12258.8	10524.6	10166								YBL039C	1740	1.74	4840.65	3077.08	4929.04	4371.84	4951.8	7045.31	6048.62	5842.56
YBL039C-A	0	0	0	0	0	0	0	0								YBL039C-A	0	0	0	0	0	0	0	0								YBL039C-A	84	0.084	0	0	0	0	0	0	0	0
YBL038W	1434	1565	2339	2335	1130	1026	1466	1230								YBL038W	1569.61	922.107	2877.71	2536.39	1058.75	1457.59	1602.19	1268.56								YBL038W	699	0.699	2245.51	1319.18	4116.89	3628.6	1514.66	2085.26	2292.11	1814.83
YBL037W	3297	3111	5360	5781	3363	3172	4663	4128								YBL037W	3608.8	1833.02	6594.49	6279.6	3150.94	4506.32	5096.17	4257.43								YBL037W	3078	3.078	1172.45	595.523	2142.46	2040.16	1023.7	1464.04	1655.68	1383.18
YBL036C	1286	2114	1566	1611	1477	1325	1527	1397								YBL036C	1407.62	1245.58	1926.67	1749.95	1383.87	1882.37	1668.85	1440.8								YBL036C	774	0.774	1818.63	1609.28	2489.24	2260.91	1787.94	2432	2156.14	1861.5
YBL035C	3408	2691	4880	5363	3499	3342	4702	3998								YBL035C	3730.3	1585.55	6003.94	5825.55	3278.37	4747.83	5138.8	4123.35								YBL035C	2118	2.118	1761.24	748.608	2834.72	2750.5	1547.86	2241.66	2426.25	1946.81
YBL034C	2019	2340	3929	4431	2412	2347	3560	3149								YBL034C	2209.94	1378.74	4833.91	4813.17	2259.91	3334.28	3890.71	3247.73								YBL034C	4542	4.542	486.556	303.554	1064.27	1059.7	497.558	734.1	856.607	715.044
YBL033C	1619	1383	2125	2145	1603	1424	1912	1564								YBL033C	1772.11	814.872	2614.42	2330	1501.92	2023.01	2089.62	1613.04								YBL033C	1038	1.038	1707.24	785.04	2518.71	2244.7	1446.94	1948.95	2013.12	1553.98
YBL032W	5541	5463	6403	6502	5171	4977	6833	6318								YBL032W	6065.02	3218.83	7877.71	7062.79	4844.94	7070.61	7467.76	6516.09								YBL032W	1146	1.146	5292.34	2808.75	6874.09	6162.99	4227.69	6169.81	6516.37	5685.94
YBL031W	751	954	1297	1412	792	767	1090	980								YBL031W	822.023	562.102	1595.72	1533.78	742.059	1089.64	1191.26	1010.73								YBL031W	1017	1.017	808.282	552.706	1569.04	1508.14	729.655	1071.43	1171.34	993.831
YBL030C	31744	28541	38717	39350	23977	25485	31856	26058								YBL030C	34746.1	16816.5	47634.1	42743.9	22465.1	36205.4	34815.3	26875								YBL030C	957	0.957	36307.3	17572.1	49774.4	44664.4	23474.5	37832.2	36379.6	28082.5
YBL029C-A	1131	2146	2441	2504	843	831	1281	1080								YBL029C-A	1237.96	1264.44	3003.2	2719.97	789.844	1180.57	1400	1113.86								YBL029C-A	285	0.285	4343.72	4436.62	10537.5	9543.74	2771.38	4142.33	4912.28	3908.29
YBL029W	597	606	886	670	629	507	693	685								YBL029W	653.459	357.059	1090.06	727.786	589.338	720.273	757.377	706.477								YBL029W	1131	1.131	577.771	315.702	963.801	643.489	521.077	636.846	669.653	624.648
YBL028C	1465	2929	2333	2558	1773	1541	1978	1938								YBL028C	1603.55	1725.78	2870.32	2778.62	1661.2	2189.23	2161.75	1998.76								YBL028C	321	0.321	4995.47	5376.27	8941.82	8656.15	5175.08	6820.04	6734.42	6226.67
YBL027W	63528	98169	55495	55832	67813	59920	73678	67950								YBL027W	69535.9	57841.7	68276.3	60647.4	63537	85125.7	80522.4	70080.4								YBL027W	570	0.57	121993	101477	119783	106399	111468	149343	141267	122948
YBL026W	1249	2462	1949	1798	1193	1025	1326	1326								YBL026W	1367.12	1450.62	2397.88	1953.07	1117.77	1456.17	1449.18	1367.57								YBL026W	288	0.288	4746.94	5036.89	8325.99	6781.51	3881.16	5056.16	5031.88	4748.52
YBL025W	309	298	301	298	256	238	293	306								YBL025W	338.222	175.583	370.325	323.702	239.858	338.116	320.219	315.594								YBL025W	438	0.438	772.197	400.875	845.49	739.046	547.62	771.955	731.093	720.534
YBL024W	9102	9051	11185	11470	9999	9843	12671	11998								YBL024W	9962.78	5332.9	13761.1	12459.3	9368.5	13983.5	13848.1	12374.2								YBL024W	2055	2.055	4848.07	2595.09	6696.39	6062.9	4558.88	6804.63	6738.73	6021.5
YBL023C	2785	2386	4470	4641	3200	2919	4072	3774								YBL023C	3048.38	1405.84	5499.51	5041.28	2998.22	4146.9	4450.27	3892.33								YBL023C	2607	2.607	1169.31	539.258	2109.52	1933.75	1150.07	1590.68	1707.05	1493.03
YBL022C	10900	7229	14364	15857	11640	10720	16032	13751								YBL022C	11930.8	4259.37	17672.2	17224.6	10906	15229.4	17521.3	14182.1								YBL022C	3402	3.402	3507	1252.02	5194.66	5063.09	3205.77	4476.61	5150.3	4168.76
YBL021C	273	476	410	461	269	226	320	329								YBL021C	298.818	280.462	504.429	500.76	252.038	321.068	349.727	339.315								YBL021C	435	0.435	686.938	644.74	1159.61	1151.17	579.397	738.088	803.97	780.035
YBL020W	2904	3904	3035	3230	3036	2979	3914	3595								YBL020W	3178.63	2300.26	3734.01	3508.58	2844.56	4232.14	4277.6	3707.71								YBL020W	1725	1.725	1842.69	1333.48	2164.64	2033.96	1649.02	2453.41	2479.77	2149.4
YBL019W	368	516	669	677	395	334	527	445								YBL019W	402.802	304.03	823.081	735.39	370.093	474.499	575.956	458.952								YBL019W	1563	1.563	257.711	194.517	526.603	470.499	236.784	303.582	368.494	293.635
YBL018C	747	1552	691	662	775	678	777	821								YBL018C	817.644	914.447	850.148	719.096	726.131	963.205	849.18	846.741								YBL018C	402	0.402	2033.94	2274.74	2114.8	1788.8	1806.3	2396.03	2112.39	2106.32
YBL017C	8064	6689	11341	12503	9813	8926	13172	11695								YBL017C	8826.62	3941.2	13953	13581.4	9194.23	12680.8	14395.6	12061.7								YBL017C	4740	4.74	1862.16	831.476	2943.67	2865.27	1939.71	2675.27	3037.05	2544.66
YBL016W	3858	3966	6752	7248	4186	3902	5485	5080								YBL016W	4222.85	2336.79	8307.09	7873.13	3922.05	5543.4	5994.54	5239.27								YBL016W	1062	1.062	3976.32	2200.37	7822.12	7413.49	3693.08	5219.78	5644.57	4933.4
YBL015W	1607	2156	2755	2527	1574	1476	2077	1766								YBL015W	1758.98	1270.33	3389.52	2744.95	1474.75	2096.89	2269.95	1821.37								YBL015W	1581	1.581	1112.57	803.496	2143.91	1736.21	932.795	1326.31	1435.77	1152.04
YBL014C	1348	1056	1529	1632	1425	1442	1852	1617								YBL014C	1475.48	622.201	1881.15	1772.76	1335.14	2048.59	2024.04	1667.7								YBL014C	2685	2.685	549.528	231.732	700.615	660.245	497.261	762.974	753.834	621.117
YBL013W	295	310	215	258	240	238	329	286								YBL013W	322.898	182.654	264.518	280.252	224.866	338.116	359.563	294.967								YBL013W	1206	1.206	267.743	151.454	219.335	232.381	186.456	280.362	298.145	244.583
YBL012C	1	0	0	0	0	0	0	1								YBL012C	1.09457	0	0	0	0	0	0	1.03135								YBL012C	402	0.402	2.72281	0	0	0	0	0	0	2.56556
YBL011W	8034	7176	7226	7401	7744	7780	9944	8878								YBL011W	8793.78	4228.14	8890.26	8039.32	7255.69	11052.7	10867.8	9156.35								YBL011W	2280	2.28	3856.92	1854.45	3899.24	3526.02	3182.32	4847.68	4766.56	4015.94
YBL010C	619	595	991	881	532	437	799	696								YBL010C	677.539	350.577	1219.24	956.985	498.454	620.827	873.224	717.822								YBL010C	843	0.843	803.724	415.869	1446.31	1135.21	591.286	736.449	1035.85	851.509
YBL009W	3155	2974	3896	3959	3179	3294	4318	3673								YBL009W	3453.37	1752.3	4793.31	4300.46	2978.54	4679.64	4719.13	3788.16								YBL009W	2031	2.031	1700.33	862.776	2360.07	2117.41	1466.54	2304.11	2323.55	1865.17
YBL008W-A	2	2	1	0	3	6	3	0								YBL008W-A	2.18914	1.17841	1.23031	0	2.81083	8.52394	3.27869	0								YBL008W-A	240	0.24	9.12142	4.91005	5.12631	0	11.7118	35.5164	13.6612	0
YBL008W	2118	1089	2450	2628	2229	2180	2664	2491								YBL008W	2318.3	641.645	3014.27	2854.66	2088.45	3097.03	2911.48	2569.1								YBL008W	2523	2.523	918.867	254.318	1194.72	1131.45	827.764	1227.52	1153.97	1018.27
YBL007C	12184	8726	18765	18779	12106	12095	17213	15986								YBL007C	13336.3	5141.41	23086.9	20398.7	11342.6	17182.8	18812	16487.2								YBL007C	3735	3.735	3570.62	1376.55	6181.22	5461.49	3036.85	4600.49	5036.69	4414.25
YBL006C	1582	2703	2242	2283	1562	1373	1843	1896								YBL006C	1731.61	1592.62	2758.37	2479.9	1463.51	1950.56	2014.21	1955.45								YBL006C	543	0.543	3188.97	2933.01	5079.86	4567.04	2695.22	3592.19	3709.41	3601.19
YBL006W-A	10	3	4	2	10	5	8	5								YBL006W-A	10.9457	1.76762	4.92126	2.1725	9.36944	7.10328	8.74317	5.15677								YBL006W-A	150	0.15	72.9714	11.7841	32.8084	14.4833	62.4629	47.3552	58.2878	34.3784
YBL005W	1682	1101	1938	2134	1714	1658	2199	1987								YBL005W	1841.07	648.716	2384.35	2318.05	1605.92	2355.45	2403.28	2049.3								YBL005W	2931	2.931	628.137	221.329	813.494	790.875	547.909	803.633	819.952	699.181
YBL005W-B	18555	10286	27886	31533	29017	32044	49090	37740								YBL005W-B	20309.8	6060.57	34308.6	34252.7	27187.3	45523.5	53650.3	38923.3								YBL005W-B	5268	5.268	3855.31	1150.45	6512.64	6502.02	5160.84	8641.52	10184.2	7388.62
YBL005W-A	0	0	0	0	0	0	0	0								YBL005W-A	0	0	0	0	0	0	0	0								YBL005W-A	1323	1.323	0	0	0	0	0	0	0	0
YBL004W	14137	19988	19286	22287	19928	19581	27680	25002								YBL004W	15473.9	11777	23727.9	24209.2	18671.4	27817.9	30251.4	25785.9								YBL004W	7482	7.482	2068.16	1574.05	3171.33	3235.66	2495.51	3717.97	4043.22	3446.39
YBL003C	11342	21452	13621	13034	10115	9179	13030	12085								YBL003C	12414.6	12639.6	16758.1	14158.2	9477.19	13040.2	14240.4	12463.9								YBL003C	399	0.399	31114.3	31678.3	42000.3	35484.1	23752.3	32682.2	35690.3	31237.9
YBL002W	15234	25300	18552	17423	13770	12664	16945	15744								YBL002W	16674.7	14906.9	22824.8	18925.7	12901.7	17991.2	18519.1	16237.6								YBL002W	396	0.396	42107.8	37643.7	57638.4	47792.2	32580.1	45432.3	46765.5	41004.1
YBL001C	1885	3344	2848	2652	1812	1460	1838	1633								YBL001C	2063.27	1970.3	3503.94	2880.73	1697.74	2074.16	2008.74	1684.2								YBL001C	315	0.315	6550.05	6254.93	11123.6	9145.17	5389.66	6584.63	6376.96	5346.67
YBR001C	1826	1066	3567	3324	1680	1470	2250	2046								YBR001C	1998.69	628.093	4388.53	3610.69	1574.07	2088.36	2459.02	2110.15								YBR001C	2343	2.343	853.046	268.072	1873.04	1541.05	671.816	891.321	1049.52	900.618
YBR002C	740	408	1116	1064	690	657	828	876								YBR002C	809.982	240.396	1373.03	1155.77	646.491	933.371	904.918	903.465								YBR002C	861	0.861	940.746	279.206	1594.69	1342.36	750.861	1084.05	1051.01	1049.32
YBR003W	3213	2365	4091	4203	2874	2741	4241	3636								YBR003W	3516.86	1393.47	5033.22	4565.5	2692.78	3894.02	4634.97	3750								YBR003W	1422	1.422	2473.18	979.938	3539.53	3210.62	1893.65	2738.41	3259.47	2637.13
YBR004C	1828	3849	2446	2504	2056	1988	2654	2337								YBR004C	2000.88	2267.85	3009.35	2719.97	1926.36	2824.26	2900.55	2410.27								YBR004C	1302	1.302	1536.77	1741.82	2311.33	2089.07	1479.54	2169.17	2227.76	1851.21
YBR005W	385	557	849	780	362	432	439	426								YBR005W	421.41	328.188	1044.54	847.274	339.174	613.724	479.781	439.356								YBR005W	642	0.642	656.402	511.196	1627.01	1319.74	528.308	955.956	747.323	684.356
YBR006W	419	673	1306	1373	408	339	516	469								YBR006W	458.625	396.535	1606.79	1491.42	382.273	481.603	563.934	483.705								YBR006W	1494	1.494	306.978	265.419	1075.5	998.272	255.872	322.358	377.466	323.765
YBR007C	1995	1266	4799	5283	2024	2088	3142	2710								YBR007C	2183.67	745.934	5904.28	5738.65	1896.37	2966.33	3433.88	2794.97								YBR007C	2211	2.211	987.639	337.374	2670.41	2595.5	857.7	1341.62	1553.09	1264.12
YBR008C	1859	1653	2062	2114	1643	1582	2481	2095								YBR008C	2034.81	973.957	2536.91	2296.33	1539.4	2247.48	2711.48	2160.68								YBR008C	1647	1.647	1235.46	591.352	1540.32	1394.25	934.668	1364.59	1646.31	1311.89
YBR009C	11726	24636	20224	20834	11020	9032	14172	12896								YBR009C	12834.9	14515.7	24881.9	22630.9	10325.1	12831.4	15488.5	13300.3								YBR009C	312	0.312	41137.6	46524.6	79749.6	72534.9	33093.3	41126.2	49642.7	42629.3
YBR010W	8825	13860	12793	11942	8145	7222	8648	8181								YBR010W	9659.59	8166.39	15739.4	12972	7631.41	10260	9451.37	8437.5								YBR010W	411	0.411	23502.6	19869.6	38295.4	31562	18567.9	24963.5	22996	20529.2
YBR011C	77314	110333	57785	56495	80406	73400	89119	86112								YBR011C	84625.7	65008.8	71093.8	61367.6	75335.9	104276	97397.8	88811.9								YBR011C	864	0.864	97946.4	75241.7	82284.4	71027.3	87194.3	120690	112729	102792
YBR012C	0	0	0	0	0	0	0	0								YBR012C	0	0	0	0	0	0	0	0								YBR012C	420	0.42	0	0	0	0	0	0	0	0
YBR012W-A	0	0	0	0	0	0	0	0								YBR012W-A	0	0	0	0	0	0	0	0								YBR012W-A	1323	1.323	0	0	0	0	0	0	0	0
YBR013C	1	0	0	0	0	0	0	0								YBR013C	1.09457	0	0	0	0	0	0	0								YBR013C	390	0.39	2.80659	0	0	0	0	0	0	0
YBR014C	446	885	781	831	535	412	637	556								YBR014C	488.179	521.447	960.876	902.672	501.265	585.31	696.175	573.432								YBR014C	612	0.612	797.678	852.038	1570.06	1474.95	819.06	956.39	1137.54	936.981
YBR015C	11070	11033	11437	11046	11269	10960	14476	13515								YBR015C	12116.9	6500.71	14071.1	11998.7	10558.4	15570.4	15820.8	13938.7								YBR015C	1794	1.794	6754.12	3623.58	7843.43	6688.24	5885.41	8679.15	8818.71	7769.64
YBR016W	3787	3215	6154	6266	2994	3129	4190	3389								YBR016W	4145.14	1894.3	7571.36	6806.43	2805.21	4445.23	4579.23	3495.26								YBR016W	387	0.387	10711	4894.82	19564.2	17587.7	7248.6	11486.4	11832.6	9031.67
YBR017C	9267	8475	13367	14471	10794	9844	13752	12972								YBR017C	10143.4	4993.52	16445.6	15719.1	10113.4	13984.9	15029.5	13378.7								YBR017C	2757	2.757	3679.14	1811.21	5965.04	5701.52	3668.25	5072.52	5451.4	4852.63
YBR018C	17	25	33	31	10	16	24	12								YBR018C	18.6077	14.7301	40.6004	33.6737	9.36944	22.7305	26.2295	12.3762								YBR018C	1101	1.101	16.9007	13.3789	36.8759	30.5846	8.50993	20.6453	23.8233	11.2409
YBR019C	42	68	53	75	44	31	50	64								YBR019C	45.972	40.066	65.2067	81.4686	41.2255	44.0403	54.6448	66.0066								YBR019C	2100	2.1	21.8914	19.079	31.0508	38.7946	19.6312	20.9716	26.0213	31.4317
YBR020W	181	80	264	278	171	202	255	257								YBR020W	198.117	47.1365	324.803	301.977	160.217	286.973	278.689	265.058								YBR020W	1587	1.587	124.838	29.7016	204.665	190.282	100.956	180.827	175.607	167.018
YBR021W	2307	2748	3389	3407	2325	2411	2946	2755								YBR021W	2525.18	1619.14	4169.54	3700.85	2178.39	3425.2	3219.67	2841.38								YBR021W	1902	1.902	1327.64	851.281	2192.19	1945.77	1145.32	1800.84	1692.78	1493.89
YBR022W	527	952	946	840	486	457	649	632								YBR022W	576.839	560.924	1163.88	912.448	455.355	649.24	709.29	651.815								YBR022W	534	0.534	1080.22	1050.42	2179.55	1708.7	852.724	1215.81	1328.26	1220.63
YBR023C	9176	8534	19995	20708	10975	10656	14982	13846								YBR023C	10043.8	5028.28	24600.1	22494	10283	15138.5	16373.8	14280.1								YBR023C	3498	3.498	2871.29	1437.47	7032.63	6430.54	2939.67	4327.76	4680.89	4082.37
YBR024W	276	446	653	633	342	239	401	390								YBR024W	302.102	262.786	803.396	687.595	320.435	339.537	438.251	402.228								YBR024W	906	0.906	333.445	290.051	886.75	758.935	353.681	374.765	483.721	443.96
YBR025C	37333	48876	40305	41770	44110	37880	50931	47016								YBR025C	40863.6	28798	49587.8	45372.6	41328.6	53814.5	55662.3	48490.1								YBR025C	1185	1.185	34484.1	24302.1	41846.3	38289.1	34876.4	45413	46972.4	40919.9
YBR026C	2586	4057	5020	4968	2558	2192	3232	2986								YBR026C	2830.56	2390.41	6176.18	5396.48	2396.7	3114.08	3532.24	3079.62								YBR026C	1143	1.143	2476.43	2091.35	5403.48	4721.33	2096.85	2724.48	3090.32	2694.33
YBR027C	18	15	11	15	8	13	14	15								YBR027C	19.7023	8.83809	13.5335	16.2937	7.49555	18.4685	15.3005	15.4703								YBR027C	333	0.333	59.166	26.5408	40.641	48.9301	22.5092	55.4611	45.9476	46.4573
YBR028C	2051	1501	2106	2260	1961	1868	2783	2463								YBR028C	2244.96	884.398	2591.04	2454.92	1837.35	2653.79	3041.53	2540.22								YBR028C	1578	1.578	1422.66	560.455	1641.98	1555.72	1164.35	1681.74	1927.46	1609.77
YBR029C	4863	6718	7089	7117	5547	4975	6623	6117								YBR029C	5322.9	3958.28	8721.7	7730.83	5197.23	7067.77	7238.25	6308.79								YBR029C	1374	1.374	3874.02	2880.85	6347.67	5626.51	3782.55	5143.93	5268.01	4591.55
YBR030W	1233	747	1237	1309	1244	1259	1632	1540								YBR030W	1349.61	440.137	1521.9	1421.9	1165.56	1788.61	1783.61	1588.28								YBR030W	1659	1.659	813.506	265.302	917.36	857.082	702.567	1078.12	1075.11	957.374
YBR031W	89005	133058	69143	68505	93541	84026	104797	101727								YBR031W	97422.3	78398.5	85067.7	74413.4	87642.6	119372	114532	104916								YBR031W	1089	1.089	89460.3	71991.3	78115.4	68331.9	80479.9	109616	105172	96342
YBR032W	13	3	2	0	1	2	1	4								YBR032W	14.2294	1.76762	2.46063	0	0.936944	2.84131	1.0929	4.12541								YBR032W	303	0.303	46.9618	5.83372	8.12089	0	3.09222	9.37727	3.60692	13.6152
YBR033W	78	114	727	670	83	65	170	130								YBR033W	85.3765	67.1695	894.439	727.786	77.7663	92.3427	185.792	134.076								YBR033W	2760	2.76	30.9335	24.3368	324.072	263.691	28.1762	33.4575	67.3161	48.5782
YBR034C	4325	5529	5992	6280	5338	5496	6475	6108								YBR034C	4734.02	3257.72	7372.05	6821.64	5001.41	7807.93	7076.5	6299.5								YBR034C	1047	1.047	4521.51	3111.48	7041.11	6515.41	4776.89	7457.43	6758.84	6016.72
YBR035C	4336	6536	6994	7210	4374	3804	5022	4739								YBR035C	4746.06	3851.05	8604.82	7831.85	4098.19	5404.18	5488.52	4887.58								YBR035C	687	0.687	6908.38	5605.6	12525.2	11400.1	5965.34	7866.34	7989.12	7114.39
YBR036C	7324	8692	10889	11007	7048	6578	9209	8587								YBR036C	8016.64	5121.38	13396.9	11956.3	6603.58	9345.08	10064.5	8856.23								YBR036C	1233	1.233	6501.73	4153.59	10865.3	9696.94	5355.7	7579.14	8162.6	7182.67
YBR037C	1394	1491	2528	2562	1186	1004	1706	1502								YBR037C	1525.83	878.506	3110.24	2782.97	1111.22	1426.34	1864.48	1549.09								YBR037C	888	0.888	1718.28	989.308	3502.52	3133.97	1251.37	1606.24	2099.64	1744.47
YBR038W	8796	9879	13819	14077	9195	9218	12378	11730								YBR038W	9627.85	5820.76	17001.7	15291.1	8615.2	13095.6	13527.9	12097.8								YBR038W	2892	2.892	3329.13	2012.71	5878.88	5287.38	2978.98	4528.22	4677.69	4183.19
YBR039W	11523	17377	17351	16958	9050	8949	14136	12090								YBR039W	12612.7	10238.6	21347.2	18420.6	8479.34	12713.5	15449.2	12469.1								YBR039W	936	0.936	13475.2	10938.7	22806.8	19680.1	9059.12	13582.7	16505.5	13321.6
YBR040W	8	9	5	8	4	4	3	5								YBR040W	8.75657	5.30285	6.15157	8.68998	3.74777	5.68263	3.27869	5.15677								YBR040W	897	0.897	9.76206	5.91176	6.85794	9.68783	4.17812	6.33515	3.65517	5.7489
YBR041W	4429	4800	5410	5533	4817	4640	6259	5519								YBR041W	4847.85	2828.19	6656	6010.21	4513.26	6591.85	6840.44	5692.04								YBR041W	2010	2.01	2411.87	1407.06	3311.44	2990.15	2245.4	3279.53	3403.2	2831.86
YBR042C	1556	3105	1576	1391	1717	1524	1912	1951								YBR042C	1703.15	1829.48	1938.98	1510.97	1608.73	2165.08	2089.62	2012.17								YBR042C	1194	1.194	1426.43	1532.23	1623.93	1265.47	1347.35	1813.3	1750.1	1685.23
YBR043C	1150	793	1484	1589	1259	1189	1659	1434								YBR043C	1258.76	467.24	1825.79	1726.05	1179.61	1689.16	1813.11	1478.96								YBR043C	2070	2.07	608.095	225.72	882.023	833.84	569.861	816.02	875.901	714.474
YBR044C	1446	1477	1919	1977	1515	1484	2155	1728								YBR044C	1582.75	870.257	2360.97	2147.51	1419.47	2108.25	2355.19	1782.18								YBR044C	1719	1.719	920.739	506.258	1373.46	1249.28	825.753	1226.44	1370.09	1036.75
YBR045C	121	89	158	173	132	119	173	180								YBR045C	132.443	52.4393	194.39	187.921	123.677	169.058	189.071	185.644								YBR045C	1920	1.92	68.9808	27.3121	101.245	97.8755	64.4149	88.0511	98.4745	96.6894
YBR046C	618	534	1021	1116	569	533	749	659								YBR046C	676.445	314.636	1256.15	1212.25	533.121	757.21	818.579	679.662								YBR046C	1005	1.005	673.079	313.071	1249.9	1206.22	530.469	753.443	814.507	676.28
YBR047W	92	183	106	109	122	105	158	138								YBR047W	100.701	107.825	130.413	118.401	114.307	149.169	172.678	142.327								YBR047W	528	0.528	190.721	204.213	246.995	224.244	216.491	282.517	327.041	269.558
YBR048W	39963	49155	29700	30187	40960	38673	45441	43080								YBR048W	43742.3	28962.4	36540.4	32790.6	38377.2	54941	49662.3	44430.7								YBR048W	471	0.471	92871.2	61491.3	77580.4	69619	81480.3	116648	105440	94332.7
YBR049C	3856	3671	5767	6681	4267	4109	6174	5252								YBR049C	4220.67	2162.97	7095.23	7257.22	3997.94	5837.48	6747.54	5416.67								YBR049C	2433	2.433	1734.76	889.015	2916.25	2982.83	1643.21	2399.29	2773.34	2226.33
YBR050C	79	70	189	203	78	87	122	102								YBR050C	86.4711	41.2444	232.53	220.508	73.0816	123.597	133.333	105.198								YBR050C	1017	1.017	85.0257	40.555	228.643	216.822	71.86	121.531	131.105	103.44
YBR051W	12	3	10	7	6	5	2	6								YBR051W	13.1349	1.76762	12.3031	7.60374	5.62166	7.10328	2.18579	6.18812								YBR051W	351	0.351	37.4212	5.03595	35.0517	21.6631	16.0161	20.2373	6.22733	17.63
YBR052C	1430	1608	3159	2954	1178	1068	1529	1308								YBR052C	1565.24	947.443	3886.56	3208.78	1103.72	1517.26	1671.04	1349.01								YBR052C	633	0.633	2472.73	1496.75	6139.91	5069.16	1743.63	2396.94	2639.87	2131.14
YBR053C	885	1517	1990	1829	849	616	1001	898								YBR053C	968.695	893.825	2448.33	1986.75	795.465	875.124	1093.99	926.155								YBR053C	1077	1.077	899.439	829.921	2273.28	1844.71	738.593	812.557	1015.77	859.94
YBR054W	1276	2116	4063	3646	1113	1064	1790	1480								YBR054W	1396.67	1246.76	4998.77	3960.46	1042.82	1511.58	1956.28	1526.4								YBR054W	1035	1.035	1349.44	1204.6	4829.73	3826.53	1007.55	1460.46	1890.13	1474.79
YBR055C	1725	1814	2428	2457	1780	1767	2448	2223								YBR055C	1888.13	1068.82	2987.2	2668.91	1667.76	2510.3	2675.41	2292.7								YBR055C	2700	2.7	699.309	395.859	1106.37	988.486	617.689	929.741	990.893	849.147
YBR056W	1575	1511	3508	3436	1359	1130	1767	1400								YBR056W	1723.95	890.29	4315.94	3732.35	1273.31	1605.34	1931.15	1443.89								YBR056W	1506	1.506	1144.72	591.162	2865.83	2478.32	845.489	1065.96	1282.3	958.761
YBR056W-A	181	314	449	484	143	126	188	184								YBR056W-A	198.117	185.011	552.411	525.744	133.983	179.003	205.464	189.769								YBR056W-A	201	0.201	985.658	920.451	2748.32	2615.64	666.582	890.561	1022.21	944.124
YBR056C-B	1	5	14	11	5	2	10	3								YBR056C-B	1.09457	2.94603	17.2244	11.9487	4.68472	2.84131	10.929	3.09406								YBR056C-B	159	0.159	6.88409	18.5285	108.33	75.1492	29.4636	17.8699	68.7356	19.4595
YBR057C	1418	1632	3182	3275	1425	1434	2138	1916								YBR057C	1552.1	961.584	3914.86	3557.46	1335.14	2037.22	2336.61	1976.07								YBR057C	1101	1.101	1409.72	873.373	3555.73	3231.12	1212.67	1850.34	2122.26	1794.8
YBR058C	4374	4217	6422	6614	4620	4475	6283	5706								YBR058C	4787.65	2484.68	7901.08	7184.44	4328.68	6357.44	6866.67	5884.9								YBR058C	2346	2.346	2040.77	1059.11	3367.9	3062.42	1845.13	2709.91	2926.97	2508.48
YBR058C-A	3138	6173	3655	3665	3101	2688	3709	3436								YBR058C-A	3434.76	3637.17	4496.8	3981.1	2905.46	3818.72	4053.55	3543.73								YBR058C-A	243	0.243	14134.8	14967.8	18505.4	16383.1	11956.6	15714.9	16681.3	14583.2
YBR059C	5193	2547	8999	9529	5344	5265	7704	6619								YBR059C	5684.11	1500.71	11071.6	10350.9	5007.03	7479.76	8419.67	6826.53								YBR059C	3327	3.327	1708.48	451.069	3327.8	3111.17	1504.97	2248.2	2530.71	2051.86
YBR060C	3062	1863	3268	3393	3039	2948	3906	3504								YBR060C	3351.58	1097.69	4020.67	3685.64	2847.37	4188.09	4268.85	3613.86								YBR060C	1863	1.863	1799.02	589.206	2158.17	1978.34	1528.38	2248.04	2291.39	1939.81
YBR061C	2284	3134	2544	2814	2311	2246	2907	2724								YBR061C	2500	1846.57	3129.92	3056.7	2165.28	3190.79	3177.05	2809.41								YBR061C	933	0.933	2679.53	1979.18	3354.69	3276.21	2320.77	3419.93	3405.2	3011.15
YBR062C	531	901	991	942	573	432	712	587								YBR062C	581.217	530.874	1219.24	1023.25	536.869	613.724	778.142	605.404								YBR062C	543	0.543	1070.38	977.669	2245.38	1884.43	988.709	1130.25	1433.04	1114.93
YBR063C	479	462	938	938	493	558	788	791								YBR063C	524.299	272.213	1154.04	1018.9	461.913	792.726	861.202	815.8								YBR063C	1215	1.215	431.522	224.044	949.823	838.601	380.176	652.45	708.808	671.441
YBR064W	1	0	0	2	1	1	3	2								YBR064W	1.09457	0	0	2.1725	0.936944	1.42066	3.27869	2.06271								YBR064W	429	0.429	2.55145	0	0	5.06409	2.18402	3.31155	7.64263	4.80817
YBR065C	560	384	841	901	556	543	791	784								YBR065C	612.96	226.255	1034.69	978.71	520.941	771.416	864.481	808.581								YBR065C	1095	1.095	559.781	206.626	944.927	893.799	475.745	704.49	789.48	738.43
YBR066C	805	1270	1241	1146	733	716	971	896								YBR066C	881.13	748.291	1526.82	1244.84	686.78	1017.19	1061.2	924.092								YBR066C	663	0.663	1329	1128.64	2302.9	1877.59	1035.87	1534.22	1600.61	1393.8
YBR067C	13320	17891	22910	24562	12031	8143	12600	12516								YBR067C	14579.7	10541.5	28186.5	26680.4	11272.4	11568.4	13770.5	12908.4								YBR067C	633	0.633	23032.7	16653.2	44528.5	42149.2	17807.9	18275.5	21754.3	20392.4
YBR068C	11554	12015	24240	24295	11798	11673	16302	14920								YBR068C	12646.7	7079.31	29822.8	26390.4	11054.1	16583.3	17816.4	15387.8								YBR068C	1830	1.83	6910.75	3868.47	16296.6	14421	6040.47	9061.92	9735.73	8408.63
YBR069C	8545	11941	9540	9808	8718	8955	11172	9770								YBR069C	9353.11	7035.71	11737.2	10653.9	8168.28	12722	12209.8	10076.3								YBR069C	1860	1.86	5028.55	3782.64	6310.33	5727.91	4391.55	6839.77	6564.43	5417.38
YBR070C	253	408	320	330	227	235	240	212								YBR070C	276.926	240.396	393.701	358.462	212.686	333.854	262.295	218.647								YBR070C	714	0.714	387.852	336.689	551.402	502.047	297.88	467.583	367.36	306.228
YBR071W	2126	2262	6668	6898	2119	2010	3120	2763								YBR071W	2327.06	1332.78	8203.74	7492.94	1985.38	2855.52	3409.84	2849.63								YBR071W	636	0.636	3658.9	2095.57	12899	11781.4	3121.67	4489.81	5361.38	4480.55
YBR072W	327	341	7564	7381	243	170	263	232								YBR072W	357.925	200.919	9306.1	8017.6	227.677	241.512	287.432	239.274								YBR072W	645	0.645	554.922	311.503	14428.1	12430.4	352.988	374.437	445.631	370.967
YBR072C-A	10	19	12	9	14	14	13	6								YBR072C-A	10.9457	11.1949	14.7638	9.77623	13.1172	19.8892	14.2077	6.18812								YBR072C-A	162	0.162	67.5661	69.1044	91.1344	60.3471	80.9704	122.773	87.7015	38.1983
YBR073W	4105	3964	7823	8621	4664	4534	6242	5526								YBR073W	4493.21	2335.61	9624.75	9364.54	4369.91	6441.26	6821.86	5699.26								YBR073W	2877	2.877	1561.77	811.822	3345.41	3254.97	1518.91	2238.88	2371.17	1980.97
YBR074W	5305	6450	5397	5475	6574	5918	8030	7448								YBR074W	5806.7	3800.38	6640.01	5947.21	6159.47	8407.44	8775.96	7681.52								YBR074W	2931	2.931	1981.13	1296.61	2265.44	2029.07	2101.49	2868.46	2994.19	2620.78
YBR076W	7	14	41	39	14	4	8	9								YBR076W	7.662	8.24888	50.4429	42.3637	13.1172	5.68263	8.74317	9.28218								YBR076W	1065	1.065	7.19436	7.74543	47.3642	39.7781	12.3166	5.3358	8.20955	8.71566
YBR076C-A	684	935	885	834	563	475	643	575								YBR076C-A	748.687	550.907	1088.83	905.931	527.499	674.812	702.732	593.028								YBR076C-A	267	0.267	2804.07	2063.32	4078.01	3393	1975.65	2527.38	2631.96	2221.08
YBR077C	741	1053	1093	1104	622	593	759	642								YBR077C	811.077	620.434	1344.73	1199.22	582.779	842.449	829.508	662.129								YBR077C	489	0.489	1658.64	1268.78	2749.97	2452.39	1191.78	1722.8	1696.34	1354.05
YBR079C	34504	27698	40586	43825	39506	38274	50522	47969								YBR079C	37767.1	16319.8	49933.6	47604.8	37014.9	54374.2	55215.3	49473								YBR079C	2895	2.895	13045.6	5637.24	17248.2	16443.8	12785.8	18782.1	19072.6	17089.1
YBR080C	4650	3798	6391	6937	4662	4508	6365	5746								YBR080C	5089.75	2237.8	7862.94	7535.3	4368.03	6404.32	6956.28	5926.16								YBR080C	2277	2.277	2235.29	982.786	3453.2	3309.31	1918.33	2812.61	3055.02	2602.62
YBR081C	1668	2566	3593	4272	2027	2027	3237	2762								YBR081C	1825.74	1511.9	4420.52	4640.45	1899.18	2879.67	3537.7	2848.6								YBR081C	3999	3.999	456.55	378.07	1105.41	1160.4	474.915	720.098	884.647	712.327
YBR082C	23847	34465	35233	35529	24433	21363	29044	25288								YBR082C	26102.2	20307	43347.7	38593.3	22892.3	30349.5	31742.1	26080.9								YBR082C	447	0.447	58394.3	45429.5	96974.7	86338.5	51213.3	67895.9	71011.4	58346.4
YBR083W	5979	4061	11794	12051	5936	5581	8551	7713								YBR083W	6544.44	2392.76	14510.3	13090.4	5561.7	7928.68	9345.36	7954.83								YBR083W	1461	1.461	4479.42	1637.76	9931.78	8959.87	3806.77	5426.89	6396.55	5444.78
YBR084W	17975	15531	17130	17115	24278	22443	28633	26264								YBR084W	19674.9	9150.95	21075.3	18591.1	22747.1	31883.8	31292.9	27087.5								YBR084W	2928	2.928	6719.57	3125.33	7197.85	6349.43	7768.82	10889.3	10687.5	9251.18
YBR084C-A	73263	129076	65315	64006	76605	68859	86261	80960								YBR084C-A	80191.5	76052.3	80358	69526.4	71774.6	97825	94274.3	83498.3								YBR084C-A	570	0.57	140687	133425	140979	121976	125920	171623	165394	146488
YBR085W	91	123	78	82	184	138	126	156								YBR085W	99.606	72.4723	95.9646	89.0723	172.398	196.051	137.705	160.891								YBR085W	924	0.924	107.799	78.4332	103.858	96.3986	186.578	212.176	149.031	174.125
YBR085C-A	1345	1901	3711	4258	1284	1081	1798	1403								YBR085C-A	1472.2	1120.08	4565.7	4625.24	1203.04	1535.73	1965.03	1446.99								YBR085C-A	258	0.258	5706.19	4341.4	17696.5	17927.3	4662.93	5952.44	7616.38	5608.48
YBR086C	25037	23369	31890	33259	27535	26381	36880	33314								YBR086C	27404.8	13769.1	39234.7	36127.5	25798.7	37478.3	40306	34358.5								YBR086C	2841	2.841	9646.17	4846.59	13810.2	12716.5	9080.87	13192	14187.3	12093.8
YBR087W	1968	3636	2920	2932	2007	1916	2475	2332								YBR087W	2154.12	2142.35	3592.52	3184.88	1880.45	2721.98	2704.92	2405.12								YBR087W	1065	1.065	2022.64	2011.6	3373.26	2990.5	1765.68	2555.85	2539.83	2258.32
YBR088C	4627	7432	7551	7391	4779	4411	6172	5575								YBR088C	5064.58	4378.98	9290.11	8028.46	4477.65	6266.52	6745.36	5749.79								YBR088C	777	0.777	6518.12	5635.75	11956.4	10332.6	5762.75	8065.01	8681.28	7399.99
YBR089W	3	1	3	7	2	6	5	3								YBR089W	3.28371	0.589206	3.69094	7.60374	1.87389	8.52394	5.46448	3.09406								YBR089W	600	0.6	5.47285	0.98201	6.15157	12.6729	3.12315	14.2066	9.10747	5.15677
YBR089C-A	2078	3013	2535	2641	1903	1835	2240	1788								YBR089C-A	2274.52	1775.28	3118.85	2868.78	1783	2606.9	2448.09	1844.06								YBR089C-A	300	0.3	7581.73	5917.59	10396.2	9562.6	5943.35	8689.68	8160.29	6146.86
YBR090C	54	76	57	78	52	54	71	55								YBR090C	59.1068	44.7796	70.128	84.7274	48.7211	76.7154	77.5956	56.7244								YBR090C	369	0.369	160.181	121.354	190.049	229.613	132.035	207.901	210.286	153.725
YBR091C	606	1216	1034	1108	501	500	733	606								YBR091C	663.31	716.474	1272.15	1203.56	469.409	710.328	801.093	625								YBR091C	330	0.33	2010.03	2171.13	3854.99	3647.16	1422.45	2152.51	2427.55	1893.94
YBR092C	7049	10077	12590	12910	9774	9893	12441	12361								YBR092C	7715.63	5937.43	15489.7	14023.5	9157.69	14054.6	13596.7	12748.6								YBR092C	1404	1.404	5495.46	4228.94	11032.5	9988.22	6522.57	10010.4	9684.27	9080.17
YBR093C	6121	8553	24508	22673	17912	15045	17238	20089								YBR093C	6699.87	5039.48	30152.6	24628.5	16782.5	21373.8	18839.3	20718.9								YBR093C	1404	1.404	4771.99	3589.37	21476.2	17541.7	11953.4	15223.5	13418.3	14757
YBR094W	3127	4271	4485	4714	3621	3369	4558	4331								YBR094W	3422.72	2516.5	5517.96	5120.57	3392.67	4786.19	4981.42	4466.79								YBR094W	2262	2.262	1513.14	1112.51	2439.42	2263.74	1499.86	2115.91	2202.22	1974.71
YBR095C	1077	1048	2026	2246	1054	928	1457	1317								YBR095C	1178.85	617.488	2492.62	2439.71	987.539	1318.37	1592.35	1358.29								YBR095C	1293	1.293	911.719	477.562	1927.78	1886.86	763.758	1019.62	1231.52	1050.5
YBR096W	2697	5376	3771	3602	2543	2355	3013	2752								YBR096W	2952.06	3167.57	4639.52	3912.67	2382.65	3345.65	3292.9	2838.28								YBR096W	693	0.693	4259.82	4570.81	6694.83	5645.98	3438.16	4827.77	4751.65	4095.65
YBR097W	1227	2369	3005	2994	1596	1363	2354	2118								YBR097W	1343.04	1395.83	3697.1	3252.23	1495.36	1936.35	2572.68	2184.41								YBR097W	4365	4.365	307.684	319.777	846.987	745.069	342.58	443.609	589.388	500.437
YBR098W	377	480	643	769	369	306	568	437								YBR098W	412.653	282.819	791.093	835.325	345.732	434.721	620.765	450.701								YBR098W	2076	2.076	198.773	136.233	381.066	402.372	166.538	209.403	299.02	217.101
YBR099C	86	103	120	106	80	63	135	136								YBR099C	94.1331	60.6882	147.638	115.142	74.9555	89.5013	147.541	140.264								YBR099C	384	0.384	245.138	158.042	384.473	299.85	195.197	233.076	384.221	365.271
YBR101C	4268	3084	6138	6320	4212	3713	5933	5223								YBR101C	4671.63	1817.11	7551.67	6865.09	3946.41	5274.9	6484.15	5386.76								YBR101C	873	0.873	5351.24	2081.46	8650.26	7863.79	4520.51	6042.26	7427.44	6170.4
YBR102C	2064	1507	2950	3394	2239	2177	3123	2665								YBR102C	2259.19	887.933	3629.43	3686.73	2097.82	3092.77	3413.11	2748.56								YBR102C	2262	2.262	998.76	392.543	1604.52	1629.85	927.417	1367.27	1508.89	1215.1
YBR103W	777	444	1371	1405	783	720	1057	1004								YBR103W	850.482	261.607	1686.76	1526.18	733.627	1022.87	1155.19	1035.48								YBR103W	1608	1.608	528.906	162.691	1048.98	949.116	456.236	636.115	718.403	643.954
YBR103C-A	3	8	6	3	2	2	8	3								YBR103C-A	3.28371	4.71365	7.38189	3.25874	1.87389	2.84131	8.74317	3.09406								YBR103C-A	144	0.144	22.8036	32.7337	51.2631	22.6302	13.0131	19.7313	60.7165	21.4865
YBR104W	963	2081	1070	1181	1393	1212	1354	1403								YBR104W	1054.07	1226.14	1316.44	1282.86	1305.16	1721.84	1479.78	1446.99								YBR104W	990	0.99	1064.72	1238.52	1329.73	1295.82	1318.35	1739.23	1494.73	1461.6
YBR105C	1420	1350	4011	4146	1223	1103	1751	1472								YBR105C	1554.29	795.428	4934.79	4503.58	1145.88	1566.98	1913.66	1518.15								YBR105C	1089	1.089	1427.26	730.42	4531.49	4135.52	1052.23	1438.92	1757.26	1394.08
YBR106W	12099	21406	10428	10593	13114	12470	14698	12918								YBR106W	13243.2	12612.5	12829.7	11506.6	12287.1	17715.6	16063.4	13323								YBR106W	567	0.567	23356.6	22244.3	22627.4	20293.9	21670.3	31244.4	28330.5	23497.4
YBR107C	181	227	228	177	210	174	275	220								YBR107C	198.117	133.75	280.512	192.266	196.758	247.194	300.546	226.898								YBR107C	738	0.738	268.452	181.233	380.097	260.523	266.61	334.951	407.245	307.449
YBR108W	2510	1874	4617	4866	2270	2467	3635	3281								YBR108W	2747.37	1104.17	5680.36	5285.68	2126.86	3504.76	3972.68	3383.87								YBR108W	2844	2.844	966.024	388.246	1997.32	1858.54	747.842	1232.33	1396.86	1189.83
YBR109C	3082	5474	5141	5117	3229	2819	3580	3259								YBR109C	3373.47	3225.31	6325.05	5558.33	3025.39	4004.83	3912.57	3361.18								YBR109C	444	0.444	7597.9	7264.22	14245.6	12518.8	6813.94	9019.89	8812.09	7570.22
YBR109W-A	27	16	23	42	27	20	23	21								YBR109W-A	29.5534	9.42729	28.2972	45.6224	25.2975	28.4131	25.1366	21.6584								YBR109W-A	225	0.225	131.349	41.8991	125.766	202.766	112.433	126.281	111.718	96.2596
YBR110W	2284	2895	2866	2844	2354	2270	2980	2706								YBR110W	2500	1705.75	3526.08	3089.29	2205.57	3224.89	3256.83	2790.84								YBR110W	1350	1.35	1851.85	1263.52	2611.91	2288.36	1633.75	2388.81	2412.47	2067.29
YBR111C	3038	5819	4784	4542	2951	2647	3896	3599								YBR111C	3325.31	3428.59	5885.83	4933.74	2764.92	3760.48	4257.92	3711.84								YBR111C	696	0.696	4777.74	4926.13	8456.65	7088.71	3972.59	5402.98	6117.71	5333.1
YBR111W-A	752	1243	1179	1133	748	620	775	809								YBR111W-A	823.117	732.383	1450.54	1230.72	700.834	880.807	846.995	834.365								YBR111W-A	291	0.291	2828.58	2516.78	4984.68	4229.28	2408.36	3026.83	2910.63	2867.23
YBR112C	11526	5050	16681	18707	11757	12278	17923	15364								YBR112C	12616	2975.49	20522.9	20320.4	11015.6	17442.8	19588	15845.7								YBR112C	2901	2.901	4348.85	1025.68	7074.42	7004.63	3797.19	6012.69	6752.15	5462.15
YBR113W	4	2	5	15	7	7	3	2								YBR113W	4.37828	1.17841	6.15157	16.2937	6.55861	9.94459	3.27869	2.06271								YBR113W	483	0.483	9.06477	2.43978	12.7362	33.7344	13.5789	20.5892	6.78817	4.27061
YBR114W	1010	570	1573	1665	1053	967	1388	1170								YBR114W	1105.52	335.847	1935.29	1808.6	986.602	1373.77	1516.94	1206.68								YBR114W	2373	2.373	465.873	141.529	815.544	762.159	415.761	578.919	639.25	508.505
YBR115C	17509	15382	19732	21561	23688	21729	27174	25740								YBR115C	19164.8	9063.16	24276.6	23420.6	22194.3	30869.4	29698.4	26547								YBR115C	4179	4.179	4585.99	2168.74	5809.18	5604.35	5310.92	7386.8	7106.57	6352.48
YBR116C	0	6	5	13	2	0	2	2								YBR116C	0	3.53523	6.15157	14.1212	1.87389	0	2.18579	2.06271								YBR116C	528	0.528	0	6.69552	11.6507	26.7447	3.54903	0	4.13976	3.90664
YBR117C	30	51	871	809	40	36	76	50								YBR117C	32.8371	30.0495	1071.6	878.775	37.4777	51.1436	83.0601	51.5677								YBR117C	2046	2.046	16.0494	14.6869	523.756	429.509	18.3176	24.9969	40.5963	25.2041
YBR118W	595967	785882	585725	607716	621188	568284	716477	674708								YBR118W	652328	463046	720626	660130	582018	807336	783035	695862								YBR118W	1377	1.377	473731	336272	523331	479397	422671	586301	568653	505347
YBR119W	711	825	1122	1146	722	649	906	772								YBR119W	778.24	486.095	1380.41	1244.84	676.473	922.006	990.164	796.205								YBR119W	897	0.897	867.603	541.912	1538.92	1387.78	754.151	1027.88	1103.86	887.631
YBR120C	283	562	695	595	271	257	340	272								YBR120C	309.764	331.134	855.069	646.318	253.912	365.109	371.585	280.528								YBR120C	489	0.489	633.463	677.165	1748.61	1321.71	519.247	746.644	759.887	573.677
YBR121C	28678	39746	28771	29741	34778	32483	40954	37941								YBR121C	31390.1	23418.6	35397.4	32306.1	32585	46147.2	44758.5	39130.6								YBR121C	2004	2.004	15663.7	11685.9	17663.4	16120.8	16260	23027.5	22334.6	19526.2
YBR121C-A	0	0	0	0	0	0	0	0								YBR121C-A	0	0	0	0	0	0	0	0								YBR121C-A	159	0.159	0	0	0	0	0	0	0	0
YBR122C	1760	2622	2653	2647	1504	1425	2078	1800								YBR122C	1926.44	1544.9	3264.03	2875.3	1409.16	2024.44	2271.04	1856.44								YBR122C	534	0.534	3607.57	2893.07	6112.41	5384.45	2638.88	3791.08	4252.88	3476.47
YBR123C	1373	1219	2167	2358	1441	1368	1832	1786								YBR123C	1502.85	718.242	2666.09	2561.37	1350.14	1943.46	2002.19	1842								YBR123C	1950	1.95	770.69	368.329	1367.23	1313.52	692.377	996.645	1026.76	944.614
YBR124W	0	0	1	4	1	0	3	1								YBR124W	0	0	1.23031	4.34499	0.936944	0	3.27869	1.03135								YBR124W	360	0.36	0	0	3.41754	12.0694	2.60262	0	9.10747	2.86487
YBR125C	1821	1244	1814	1780	1750	1609	2056	1812								YBR125C	1993.21	732.972	2231.79	1933.52	1639.65	2285.84	2246.99	1868.81								YBR125C	1182	1.182	1686.31	620.112	1888.15	1635.81	1387.18	1933.87	1901.01	1581.06
YBR126C	6162	4445	13438	13225	5276	4396	7622	6557								YBR126C	6744.75	2619.02	16533	14365.6	4943.31	6245.21	8330.05	6762.58								YBR126C	1488	1.488	4532.76	1760.09	11110.9	9654.32	3322.12	4197.05	5598.16	4544.75
YBR126W-A	0	5	1	3	6	1	1	3								YBR126W-A	0	2.94603	1.23031	3.25874	5.62166	1.42066	1.0929	3.09406								YBR126W-A	207	0.207	0	14.232	5.94355	15.7427	27.1578	6.86307	5.27969	14.9471
YBR126W-B	123	232	123	121	98	103	111	85								YBR126W-B	134.632	136.696	151.329	131.436	91.8205	146.328	121.311	87.665								YBR126W-B	144	0.144	934.946	949.276	1050.89	912.75	637.642	1016.16	842.441	608.785
YBR127C	34108	44166	40373	39261	38880	33448	40586	40312								YBR127C	37333.6	26022.9	49671.5	42647.2	36428.4	47518.1	44356.3	41575.9								YBR127C	1554	1.554	24024.2	16745.7	31963.6	27443.5	23441.7	30577.9	28543.3	26754.1
YBR128C	96	128	144	167	82	67	89	80								YBR128C	105.079	75.4183	177.165	181.403	76.8294	95.184	97.2678	82.5083								YBR128C	1035	1.035	101.525	72.868	171.174	175.269	74.2313	91.9652	93.9785	79.7181
YBR129C	732	1177	1065	1019	595	510	843	778								YBR129C	801.226	693.495	1310.29	1106.89	557.481	724.535	921.311	802.393								YBR129C	987	0.987	811.779	702.629	1327.54	1121.47	564.824	734.078	933.446	812.961
YBR130C	3224	2376	4526	4494	2771	2780	3647	3536								YBR130C	3528.9	1399.95	5568.41	4881.6	2596.27	3949.42	3985.79	3646.86								YBR130C	1278	1.278	2761.27	1095.42	4357.12	3819.72	2031.51	3090.32	3118.77	2853.57
YBR131W	515	509	754	863	513	522	761	631								YBR131W	563.704	299.906	927.657	937.432	480.652	741.583	831.694	650.784								YBR131W	2115	2.115	266.527	141.799	438.609	443.23	227.259	350.63	393.236	307.699
YBR131C-A	0	1	0	0	0	0	0	0								YBR131C-A	0	0.589206	0	0	0	0	0	0								YBR131C-A	90	0.09	0	6.54673	0	0	0	0	0	0
YBR132C	1256	1188	4666	4588	942	926	1686	1276								YBR132C	1374.78	699.976	5740.65	4983.71	882.601	1315.53	1842.62	1316.01								YBR132C	1791	1.791	767.605	390.83	3205.28	2782.64	492.798	734.521	1028.82	734.789
YBR133C	6422	4070	7966	8403	6440	6605	9291	8273								YBR133C	7029.33	2398.07	9800.69	9127.74	6033.92	9383.44	10154.1	8532.38								YBR133C	2484	2.484	2829.84	965.406	3945.53	3674.61	2429.11	3777.55	4087.8	3434.94
YBR134W	4	0	4	4	1	1	2	2								YBR134W	4.37828	0	4.92126	4.34499	0.936944	1.42066	2.18579	2.06271								YBR134W	402	0.402	10.8913	0	12.2419	10.8084	2.33071	3.53397	5.43729	5.13111
YBR135W	1866	2529	2447	2463	1858	1784	2233	2044								YBR135W	2042.47	1490.1	3010.58	2675.43	1740.84	2534.45	2440.44	2108.09								YBR135W	453	0.453	4508.76	3289.41	6645.87	5906.02	3842.92	5594.81	5387.28	4653.61
YBR136W	2689	2503	5426	6236	3212	3235	4738	4294								YBR136W	2943.3	1474.78	6675.69	6773.84	3009.46	4595.82	5178.14	4428.63								YBR136W	7107	7.107	414.141	207.511	939.312	953.123	423.451	646.661	728.597	623.136
YBR137W	1024	1811	1588	1510	940	887	1209	991								YBR137W	1120.84	1067.05	1953.74	1640.23	880.727	1260.12	1321.31	1022.07								YBR137W	540	0.54	2075.63	1976.02	3618.04	3037.47	1630.98	2333.56	2446.87	1892.72
YBR138C	464	772	1824	1984	587	596	953	747								YBR138C	507.881	454.867	2244.09	2155.12	549.986	846.711	1041.53	770.421								YBR138C	1575	1.575	322.464	288.804	1424.82	1368.33	349.197	537.594	661.289	489.156
YBR139W	3895	3766	10606	10371	3846	3408	5492	4809								YBR139W	4263.35	2218.95	13048.7	11265.5	3603.49	4841.6	6002.19	4959.78								YBR139W	1527	1.527	2791.98	1453.14	8545.33	7377.52	2359.85	3170.66	3930.7	3248.05
YBR141C	445	346	527	608	481	478	534	486								YBR141C	487.084	203.865	648.376	660.439	450.67	679.074	583.607	501.238								YBR141C	1014	1.014	480.359	201.05	639.424	651.32	444.448	669.698	575.549	494.317
YBR141W-A	20	4	20	16	11	12	6	15								YBR141W-A	21.8914	2.35682	24.6063	17.38	10.3064	17.0479	6.55738	15.4703								YBR141W-A	96	0.096	228.036	24.5502	256.316	181.041	107.358	177.582	68.306	161.149
YBR142W	3116	4331	4710	5554	4218	4382	5732	5126								YBR142W	3410.68	2551.85	5794.78	6033.02	3952.03	6225.32	6264.48	5286.72								YBR142W	2322	2.322	1468.86	1098.99	2495.6	2598.2	1701.99	2681.01	2697.88	2276.79
YBR143C	9868	20806	14706	15296	12421	11629	14660	13988								YBR143C	10801.2	12259	18093	16615.3	11637.8	16520.8	16021.9	14426.6								YBR143C	1314	1.314	8220.11	9329.54	13769.4	12644.8	8856.76	12572.9	12193.2	10979.1
YBR144C	11	18	7	7	5	16	14	15								YBR144C	12.0403	10.6057	8.6122	7.60374	4.68472	22.7305	15.3005	15.4703								YBR144C	315	0.315	38.2231	33.6689	27.3403	24.1388	14.8721	72.1603	48.5732	49.1121
YBR145W	281	320	328	305	497	457	459	443								YBR145W	307.574	188.546	403.543	331.306	465.661	649.24	501.639	456.889								YBR145W	1056	1.056	291.264	178.547	382.143	313.736	440.967	614.811	475.037	432.66
YBR146W	4183	6232	6437	6776	3926	3791	5555	4993								YBR146W	4578.59	3671.93	7919.54	7360.42	3678.44	5385.71	6071.04	5149.55								YBR146W	837	0.837	5470.24	4387.01	9461.81	8793.81	4394.79	6434.54	7253.33	6152.38
YBR147W	78	134	379	314	130	108	120	113								YBR147W	85.3765	78.9536	466.289	341.082	121.803	153.431	131.148	116.543								YBR147W	891	0.891	95.821	88.6123	523.333	382.808	136.703	172.201	147.191	130.8
YBR148W	58	68	68	59	62	89	103	77								YBR148W	63.4851	40.066	83.6614	64.0886	58.0905	126.438	112.568	79.4142								YBR148W	1830	1.83	34.6913	21.894	45.7166	35.0211	31.7434	69.092	61.5127	43.3957
YBR149W	4458	4108	13123	13022	4000	3560	5812	5149								YBR149W	4879.6	2420.46	16145.4	14145.1	3747.77	5057.54	6351.91	5310.44								YBR149W	1035	1.035	4714.59	2338.61	15599.4	13666.8	3621.04	4886.51	6137.11	5130.86
YBR150C	1026	1032	2920	3064	1101	1060	1669	1381								YBR150C	1123.03	608.06	3592.52	3328.26	1031.58	1505.9	1824.04	1424.3								YBR150C	3285	3.285	341.866	185.102	1093.61	1013.17	314.026	458.416	555.264	433.576
YBR151W	5072	6325	6064	6046	5022	4440	6012	5570								YBR151W	5551.66	3726.73	7460.63	6567.46	4705.33	6307.71	6570.49	5744.64								YBR151W	951	0.951	5837.71	3918.74	7845.04	6905.84	4947.77	6632.72	6909.03	6040.63
YBR152W	437	257	438	483	407	452	562	545								YBR152W	478.327	151.426	538.878	524.658	381.336	642.137	614.208	562.087								YBR152W	876	0.876	546.036	172.861	615.157	598.924	435.315	733.033	701.15	641.652
YBR153W	1121	874	1617	1653	999	818	1296	1232								YBR153W	1227.01	514.966	1989.42	1795.57	936.007	1162.1	1416.39	1270.63								YBR153W	735	0.735	1669.41	700.634	2706.69	2442.95	1273.48	1581.08	1927.07	1728.74
YBR154C	2572	4551	3690	3701	3081	2909	3702	3459								YBR154C	2815.24	2681.48	4539.86	4020.2	2886.72	4132.69	4045.9	3567.45								YBR154C	648	0.648	4344.5	4138.08	7005.96	6204.02	4454.82	6377.61	6243.68	5505.32
YBR155W	1162	860	948	1066	1495	1282	1458	1314								YBR155W	1271.89	506.717	1166.34	1157.94	1400.73	1821.28	1593.44	1355.2								YBR155W	1158	1.158	1098.35	437.579	1007.2	999.949	1209.61	1572.78	1376.03	1170.29
YBR156C	1239	812	2207	2316	1113	1224	1744	1487								YBR156C	1356.17	478.435	2715.31	2515.75	1042.82	1738.88	1906.01	1533.62								YBR156C	2097	2.097	646.721	228.152	1294.85	1199.69	497.291	829.224	908.923	731.341
YBR157C	963	1271	1873	1915	801	711	1178	926								YBR157C	1054.07	748.881	2304.38	2080.17	750.492	1010.09	1287.43	955.033								YBR157C	768	0.768	1372.49	975.105	3000.49	2708.55	977.203	1315.22	1676.34	1243.53
YBR158W	11149	11111	20244	21652	11459	10771	15630	14082								YBR158W	12203.4	6546.67	24906.5	23519.4	10736.4	15301.9	17082	14523.5								YBR158W	1650	1.65	7395.98	3967.68	15094.8	14254.2	6506.93	9273.87	10352.7	8802.13
YBR159W	5686	10747	7312	6885	6218	5590	7718	7136								YBR159W	6223.73	6332.19	8996.06	7478.82	5825.92	7941.47	8434.97	7359.74								YBR159W	1044	1.044	5961.43	6065.32	8616.92	7163.62	5580.38	7606.77	8079.48	7049.56
YBR160W	2260	2965	4920	5311	2327	2221	3047	2804								YBR160W	2473.73	1747	6053.15	5769.06	2180.27	3155.28	3330.05	2891.91								YBR160W	897	0.897	2757.78	1947.6	6748.22	6431.51	2430.62	3517.59	3712.44	3223.98
YBR161W	742	783	1382	1378	797	645	910	811								YBR161W	812.172	461.348	1700.3	1496.85	746.744	916.323	994.536	836.427								YBR161W	1131	1.131	718.1	407.912	1503.36	1323.47	660.251	810.189	879.342	739.547
YBR162C	42622	56956	55768	56398	49264	49504	64304	58882								YBR162C	46652.8	33558.8	68612.2	61262.2	46157.6	70328.2	70277.6	60728.1								YBR162C	1368	1.368	34102.9	24531.3	50155.1	44782.3	33740.9	51409.5	51372.5	44391.9
YBR162W-A	182	224	225	286	177	158	156	146								YBR162W-A	199.212	131.982	276.821	310.667	165.839	224.464	170.492	150.578								YBR162W-A	198	0.198	1006.12	666.576	1398.09	1569.03	837.571	1133.66	861.07	760.493
YBR163W	1631	1593	1568	1483	1660	1619	2203	2029								YBR163W	1785.25	938.605	1929.13	1610.91	1555.33	2300.04	2407.65	2092.62								YBR163W	1758	1.758	1015.5	533.905	1097.35	916.329	884.714	1308.33	1369.54	1190.34
YBR164C	536	895	678	659	554	495	578	476								YBR164C	586.69	527.339	834.154	715.837	519.067	703.225	631.694	490.924								YBR164C	552	0.552	1062.84	955.325	1511.15	1296.81	940.338	1273.96	1144.37	889.355
YBR165W	830	1660	1818	2029	885	828	1220	1096								YBR165W	908.494	978.082	2236.71	2204	829.195	1176.3	1333.33	1130.36								YBR165W	834	0.834	1089.32	1172.76	2681.91	2642.68	994.239	1410.44	1598.72	1355.35
YBR166C	2329	2320	3999	4288	2734	2473	3637	3086								YBR166C	2549.26	1366.96	4920.03	4657.83	2561.6	3513.28	3974.86	3182.76								YBR166C	1359	1.359	1875.83	1005.86	3620.33	3427.4	1884.92	2585.2	2924.84	2341.98
YBR167C	171	270	339	366	190	178	227	163								YBR167C	187.172	159.086	417.077	397.567	178.019	252.877	248.087	168.111								YBR167C	423	0.423	442.486	376.089	985.997	939.874	420.849	597.818	586.495	397.424
YBR168W	470	994	796	732	501	463	721	715								YBR168W	514.448	585.671	979.331	795.134	469.409	657.764	787.978	737.417								YBR168W	1242	1.242	414.21	471.554	788.511	640.204	377.946	529.601	634.443	593.734
YBR169C	1621	1404	6383	6517	1250	1132	2438	1879								YBR169C	1774.3	827.245	7853.1	7079.08	1171.18	1608.18	2664.48	1937.91								YBR169C	2082	2.082	852.209	397.332	3771.9	3400.13	562.526	772.422	1279.77	930.794
YBR170C	1761	1402	2524	2709	1725	1465	2207	1896								YBR170C	1927.54	826.066	3105.31	2942.65	1616.23	2081.26	2412.02	1955.45								YBR170C	1743	1.743	1105.87	473.934	1781.59	1688.27	927.268	1194.07	1383.83	1121.88
YBR171W	2637	2718	3193	3369	2660	2392	3121	2655								YBR171W	2886.38	1601.46	3928.4	3659.57	2492.27	3398.21	3410.93	2738.24								YBR171W	621	0.621	4647.96	2578.84	6325.92	5893.03	4013.32	5472.16	5492.64	4409.41
YBR172C	5107	3807	10169	11137	5434	5413	8057	7582								YBR172C	5589.97	2243.11	12511.1	12097.5	5091.35	7690.01	8805.46	7819.72								YBR172C	2223	2.223	2514.61	1009.04	5628.01	5441.99	2290.31	3459.3	3961.07	3517.64
YBR173C	4428	8099	7901	8272	4410	3745	5298	4693								YBR173C	4846.76	4771.98	9720.72	8985.44	4131.92	5320.36	5790.16	4840.14								YBR173C	447	0.447	10842.9	10675.6	21746.6	20101.7	9243.67	11902.4	12953.4	10828.1
YBR174C	20	3	8	1	6	12	17	5								YBR174C	21.8914	1.76762	9.84252	1.08625	5.62166	17.0479	18.5792	5.15677								YBR174C	315	0.315	69.4966	5.61148	31.2461	3.44841	17.8465	54.1202	58.9817	16.3707
YBR175W	810	1348	1209	1225	745	671	907	844								YBR175W	886.602	794.249	1487.45	1330.65	698.023	953.26	991.257	870.462								YBR175W	948	0.948	935.235	837.816	1569.04	1403.64	736.311	1005.55	1045.63	918.209
YBR176W	516	782	583	614	570	570	629	583								YBR176W	564.799	460.759	717.274	666.956	534.058	809.774	687.432	601.279								YBR176W	939	0.939	601.489	490.691	763.87	710.284	568.752	862.379	732.089	640.34
YBR177C	7448	8466	9601	9358	6930	5897	8281	7749								YBR177C	8152.36	4988.22	11812.3	10165.1	6493.02	8377.61	9050.27	7991.96								YBR177C	1356	1.356	6012.07	3678.63	8711.1	7496.39	4788.36	6178.18	6674.24	5893.77
YBR178W	0	11	12	9	3	3	8	16								YBR178W	0	6.48126	14.7638	9.77623	2.81083	4.26197	8.74317	16.5017								YBR178W	375	0.375	0	17.2834	39.3701	26.07	7.49555	11.3653	23.3151	44.0044
YBR179C	2211	3117	5028	5562	2392	2400	3907	3089								YBR179C	2420.1	1836.55	6186.02	6041.71	2241.17	3409.58	4269.95	3185.85								YBR179C	2568	2.568	942.405	715.169	2408.89	2352.69	872.729	1327.72	1662.75	1240.6
YBR180W	13	10	24	19	17	38	25	24								YBR180W	14.2294	5.89206	29.5276	20.6387	15.928	53.9849	27.3224	24.7525								YBR180W	1719	1.719	8.27773	3.42761	17.1772	12.0062	9.26588	31.4049	15.8944	14.3993
YBR181C	38441	68030	36725	36190	39234	36831	45437	43700								YBR181C	42076.4	40083.7	45183.3	39311.3	36760	52324.2	49657.9	45070.1								YBR181C	711	0.711	59179.2	56376.5	63549	55290.2	51701.9	73592.4	69842.4	63389.8
YBR182C	379	387	624	630	373	373	508	429								YBR182C	414.842	228.023	767.717	684.336	349.48	529.905	555.191	442.45								YBR182C	1359	1.359	305.256	167.787	564.913	503.559	257.16	389.923	408.529	325.571
YBR182C-A	5	24	10	11	7	9	11	14								YBR182C-A	5.47285	14.1409	12.3031	11.9487	6.55861	12.7859	12.0219	14.4389								YBR182C-A	195	0.195	28.0659	72.5176	63.0931	61.2755	33.6339	65.5688	61.6506	74.0459
YBR183W	726	1362	4097	3627	517	372	762	630								YBR183W	794.658	802.498	5040.6	3939.82	484.4	528.484	832.787	649.752								YBR183W	951	0.951	835.603	843.847	5300.32	4142.82	509.358	555.714	875.696	683.231
YBR184W	100	168	222	196	100	87	148	111								YBR184W	109.457	98.9866	273.13	212.905	93.6944	123.597	161.749	114.48								YBR184W	1572	1.572	69.6292	62.9686	173.747	135.436	59.602	78.6241	102.894	72.8246
YBR185C	1428	2215	2561	2589	1325	1070	1777	1536								YBR185C	1563.05	1305.09	3150.84	2812.3	1241.45	1520.1	1942.08	1584.16								YBR185C	837	0.837	1867.44	1559.25	3764.44	3359.97	1483.21	1816.13	2320.28	1892.66
YBR186W	13	12	33	34	16	8	22	20								YBR186W	14.2294	7.07047	40.6004	36.9324	14.9911	11.3653	24.0437	20.6271								YBR186W	1695	1.695	8.39494	4.17137	23.953	21.789	8.84431	6.70516	14.1851	12.1694
YBR187W	4296	5775	3743	3390	3947	3865	4502	4325								YBR187W	4702.28	3402.66	4605.07	3682.38	3698.12	5490.84	4920.22	4460.6								YBR187W	843	0.843	5578.03	4036.37	5462.72	4368.19	4386.85	6513.45	5836.56	5291.34
YBR188C	608	920	1299	1292	680	662	890	788								YBR188C	665.499	542.069	1598.18	1403.43	637.122	940.474	972.678	812.706								YBR188C	423	0.423	1573.28	1281.49	3778.2	3317.81	1506.2	2223.34	2299.47	1921.29
YBR189W	100326	158264	79866	80050	94760	85177	105285	99514								YBR189W	109814	93250.1	98260.3	86954.2	88784.8	121007	115066	102634								YBR189W	588	0.588	186758	158589	167109	147881	150995	205795	195690	174548
YBR190W	13	0	3	7	4	5	3	6								YBR190W	14.2294	0	3.69094	7.60374	3.74777	7.10328	3.27869	6.18812								YBR190W	312	0.312	45.6071	0	11.83	24.371	12.0121	22.7669	10.5086	19.8337
YBR191W	60997	124368	51043	48727	62800	55583	68199	65128								YBR191W	66765.5	73278.3	62799	52929.6	58840.1	78964.3	74534.4	67170								YBR191W	483	0.483	138231	151715	130019	109585	121822	163487	154316	139068
YBR191W-A	73	196	64	52	67	83	96	85								YBR191W-A	79.9037	115.484	78.7402	56.4849	62.7752	117.914	104.918	87.665								YBR191W-A	75	0.075	1065.38	1539.79	1049.87	753.132	837.003	1572.19	1398.91	1168.87
YBR192W	1198	2124	1525	1404	1173	1142	1597	1377								YBR192W	1311.3	1251.47	1876.23	1525.09	1099.03	1622.39	1745.36	1420.17								YBR192W	1134	1.134	1156.35	1103.59	1654.52	1344.88	969.167	1430.68	1539.11	1252.36
YBR193C	814	891	1435	1397	733	771	1014	938								YBR193C	890.981	524.982	1765.5	1517.49	686.78	1095.33	1108.2	967.409								YBR193C	672	0.672	1325.86	781.224	2627.24	2258.17	1021.99	1629.95	1649.1	1439.6
YBR194W	414	732	841	851	337	325	485	423								YBR194W	453.152	431.299	1034.69	924.397	315.75	461.713	530.055	436.262								YBR194W	372	0.372	1218.15	1159.4	2781.44	2484.94	848.79	1241.16	1424.88	1172.75
YBR195C	1080	1073	1432	1390	1167	1044	1462	1268								YBR195C	1182.14	632.218	1761.81	1509.88	1093.41	1483.17	1597.81	1307.76								YBR195C	1269	1.269	931.55	498.202	1388.35	1189.82	861.634	1168.77	1259.11	1030.54
YBR196C	106561	138440	143592	147235	121935	111600	138592	131805								YBR196C	116639	81569.6	176663	159934	114246	158545	151467	135938								YBR196C	1665	1.665	70053.2	48990.8	106104	96056.3	68616.4	95222.4	90971	81644.1
YBR196C-A	54	66	52	34	55	75	56	55								YBR196C-A	59.1068	38.8876	63.9764	36.9324	51.5319	106.549	61.2022	56.7244								YBR196C-A	150	0.15	394.046	259.251	426.509	246.216	343.546	710.328	408.015	378.163
YBR196C-B	27	15	16	11	27	38	40	35								YBR196C-B	29.5534	8.83809	19.685	11.9487	25.2975	53.9849	43.7158	36.0974								YBR196C-B	105	0.105	281.461	84.1723	187.477	113.797	240.928	514.142	416.341	343.784
YBR197C	1000	852	1140	1180	877	924	1147	1195								YBR197C	1094.57	502.003	1402.56	1281.77	821.7	1312.69	1253.55	1232.47								YBR197C	654	0.654	1673.66	767.589	2144.59	1959.9	1256.42	2007.17	1916.75	1884.51
YBR198C	4369	2328	6559	6882	4653	4727	6499	5591								YBR198C	4782.18	1371.67	8069.64	7475.56	4359.6	6715.44	7102.73	5766.3								YBR198C	2397	2.397	1995.07	572.245	3366.56	3118.71	1818.77	2801.6	2963.18	2405.63
YBR199W	3138	3667	4766	4798	3180	2886	3875	3475								YBR199W	3434.76	2160.62	5863.68	5211.82	2979.48	4100.01	4234.97	3583.95								YBR199W	1395	1.395	2462.2	1548.83	4203.36	3736.07	2135.83	2939.08	3035.82	2569.14
YBR200W	1708	1119	2604	2681	1787	1678	2414	2151								YBR200W	1869.53	659.321	3203.74	2912.23	1674.32	2383.86	2638.25	2218.44								YBR200W	1656	1.656	1128.94	398.141	1934.63	1758.59	1011.06	1439.53	1593.15	1339.64
YBR200W-A	0	0	0	0	0	0	0	0								YBR200W-A	0	0	0	0	0	0	0	0								YBR200W-A	165	0.165	0	0	0	0	0	0	0	0
YBR201W	579	1381	1217	1250	679	554	778	783								YBR201W	633.757	813.693	1497.29	1357.81	636.185	787.044	850.273	807.55								YBR201W	636	0.636	996.473	1279.39	2354.23	2134.92	1000.29	1237.49	1336.91	1269.73
YBR201C-A	101	179	269	311	141	93	139	116								YBR201C-A	110.552	105.468	330.955	337.823	132.109	132.121	151.913	119.637								YBR201C-A	204	0.204	541.92	516.999	1622.33	1656	647.593	647.652	744.669	586.456
YBR202W	6428	5131	9114	9805	6759	6652	9249	8371								YBR202W	7035.9	3023.21	11213.1	10650.7	6332.8	9450.21	10108.2	8633.46								YBR202W	2538	2.538	2772.22	1191.18	4418.08	4196.48	2495.19	3723.49	3982.74	3401.68
YBR203W	1620	1654	4836	5014	1811	1708	2187	1865								YBR203W	1773.2	974.546	5949.8	5446.45	1696.81	2426.48	2390.16	1923.47								YBR203W	2775	2.775	638.993	351.188	2144.07	1962.68	611.461	874.408	861.32	693.144
YBR204C	789	494	1355	1378	724	612	1088	938								YBR204C	863.616	291.068	1667.08	1496.85	678.347	869.442	1189.07	967.409								YBR204C	1128	1.128	765.617	258.039	1477.9	1326.99	601.372	770.782	1054.14	857.632
YBR205W	3988	4331	3713	3668	4246	4165	4935	4620								YBR205W	4365.15	2551.85	4568.16	3984.36	3978.26	5917.03	5393.44	4764.85								YBR205W	1215	1.215	3592.72	2100.29	3759.8	3279.31	3274.29	4869.99	4439.05	3921.69
YBR206W	338	298	223	251	308	272	362	361								YBR206W	369.965	175.583	274.36	272.648	288.579	386.419	395.628	372.318								YBR206W	324	0.324	1141.87	541.924	846.791	841.507	890.675	1192.65	1221.08	1149.13
YBR207W	2738	3077	3941	4160	2437	2308	3534	3031								YBR207W	2996.94	1812.99	4848.67	4518.79	2283.33	3278.87	3862.3	3126.03								YBR207W	1398	1.398	2143.73	1296.84	3468.29	3232.33	1633.28	2345.4	2762.73	2236.07
YBR208C	2937	2945	6244	6871	7085	5167	7728	7346								YBR208C	3214.75	1735.21	7682.09	7463.61	6638.25	7340.53	8445.9	7576.32								YBR208C	5508	5.508	583.652	315.035	1394.71	1355.05	1205.2	1332.7	1533.39	1375.51
YBR209W	7	3	2	5	3	9	1	2								YBR209W	7.662	1.76762	2.46063	5.43124	2.81083	12.7859	1.0929	2.06271								YBR209W	318	0.318	24.0943	5.55854	7.73783	17.0794	8.83909	40.2073	3.43678	6.4865
YBR210W	427	873	547	543	430	379	561	502								YBR210W	467.382	514.377	672.982	589.833	402.886	538.429	613.115	517.739								YBR210W	429	0.429	1089.47	1199.01	1568.72	1374.9	939.128	1255.08	1429.17	1206.85
YBR211C	514	1263	1438	1401	566	461	733	699								YBR211C	562.609	744.167	1769.19	1521.83	530.31	654.923	801.093	720.916								YBR211C	975	0.975	577.035	763.248	1814.56	1560.85	543.908	671.715	821.634	739.401
YBR212W	6208	4379	11319	12270	5601	5343	8852	7283								YBR212W	6795.1	2580.13	13925.9	13328.3	5247.82	7590.57	9674.32	7511.34								YBR212W	2019	2.019	3365.58	1277.93	6897.44	6601.42	2599.22	3759.57	4791.64	3720.33
YBR213W	881	1228	810	870	1132	954	1139	1188								YBR213W	964.317	723.545	996.555	945.036	1060.62	1355.31	1244.81	1225.25								YBR213W	825	0.825	1168.87	877.024	1207.95	1145.5	1285.6	1642.8	1508.86	1485.15
YBR214W	3376	3158	10524	10702	2684	2307	4436	3654								YBR214W	3695.27	1860.71	12947.8	11625	2514.76	3277.45	4848.09	3768.56								YBR214W	1584	1.584	2332.87	1174.69	8174.14	7339.03	1587.6	2069.1	3060.66	2379.14
YBR215W	2147	1276	3342	3872	1949	1924	2938	2558								YBR215W	2350.04	751.827	4111.71	4205.95	1826.1	2733.34	3210.93	2638.2								YBR215W	1878	1.878	1251.35	400.334	2189.41	2239.59	972.366	1455.45	1709.76	1404.79
YBR216C	1308	1243	1708	1725	1254	1207	1758	1557								YBR216C	1431.7	732.383	2101.38	1873.78	1174.93	1714.73	1921.31	1605.82								YBR216C	2025	2.025	707.012	361.67	1037.72	925.322	580.211	846.781	948.796	792.996
YBR217W	268	522	333	310	235	220	318	340								YBR217W	293.345	307.565	409.695	336.737	220.182	312.544	347.541	350.66								YBR217W	561	0.561	522.897	548.245	730.294	600.244	392.481	557.12	619.503	625.063
YBR218C	20568	24574	22383	21868	27219	26817	30810	29142								YBR218C	22513.1	14479.1	27538.1	23754.1	25502.7	38097.7	33672.1	30055.7								YBR218C	3543	3.543	6354.26	4086.69	7772.55	6704.51	7198.04	10753	9503.85	8483.12
YBR219C	6	7	1	2	3	4	5	5								YBR219C	6.56743	4.12444	1.23031	2.1725	2.81083	5.68263	5.46448	5.15677								YBR219C	384	0.384	17.1027	10.7407	3.20395	5.65754	7.31987	14.7985	14.2304	13.4291
YBR220C	2108	1875	1844	1805	2169	2139	2547	2345								YBR220C	2307.36	1104.76	2268.7	1960.68	2032.23	3038.78	2783.61	2418.52								YBR220C	1683	1.683	1370.98	656.424	1348.01	1164.99	1207.5	1805.58	1653.96	1437.03
YBR221C	15372	17987	14527	13984	17279	15935	19139	18184								YBR221C	16825.7	10598	17872.8	15190.1	16189.5	22638.2	20916.9	18754.1								YBR221C	1101	1.101	15282.2	9625.83	16233.2	13796.6	14704.3	20561.5	18998.1	17033.7
YBR221W-A	0	0	0	0	0	0	0	0								YBR221W-A	0	0	0	0	0	0	0	0								YBR221W-A	105	0.105	0	0	0	0	0	0	0	0
YBR222C	5274	6509	8429	8545	5789	5307	7390	6512								YBR222C	5772.77	3835.14	10370.3	9281.99	5423.97	7539.42	8076.5	6716.17								YBR222C	1632	1.632	3537.23	2349.96	6354.37	5687.49	3323.51	4619.74	4948.84	4115.3
YBR223C	957	687	1226	1252	891	836	1207	1119								YBR223C	1047.5	404.784	1508.37	1359.98	834.817	1187.67	1319.13	1154.08								YBR223C	1635	1.635	640.675	247.575	922.548	831.794	510.591	726.403	806.805	705.862
YBR223W-A	0	0	0	0	0	0	0	0								YBR223W-A	0	0	0	0	0	0	0	0								YBR223W-A	120	0.12	0	0	0	0	0	0	0	0
YBR224W	14	9	48	49	19	20	20	13								YBR224W	15.324	5.30285	59.0551	53.2262	17.8019	28.4131	21.8579	13.4076								YBR224W	516	0.516	29.6977	10.2768	114.448	103.151	34.4999	55.0642	42.3603	25.9837
YBR225W	2158	1443	4743	4982	2152	2060	2984	2713								YBR225W	2362.08	850.224	5835.38	5411.69	2016.3	2926.55	3261.2	2798.06								YBR225W	2703	2.703	873.875	314.548	2158.85	2002.1	745.95	1082.71	1206.51	1035.17
YBR226C	1	0	0	0	1	0	0	0								YBR226C	1.09457	0	0	0	0.936944	0	0	0								YBR226C	411	0.411	2.66319	0	0	0	2.27967	0	0	0
YBR227C	1095	1099	1261	1436	1281	1293	1575	1492								YBR227C	1198.56	647.537	1551.43	1559.85	1200.22	1836.91	1721.31	1538.78								YBR227C	1563	1.563	766.83	414.291	992.596	997.986	767.898	1175.25	1101.29	984.503
YBR228W	100	51	134	135	107	100	146	135								YBR228W	109.457	30.0495	164.862	146.643	100.253	142.066	159.563	139.233								YBR228W	915	0.915	119.625	32.841	180.177	160.266	109.566	155.263	174.386	152.167
YBR229C	5108	4855	6091	6543	5756	5366	7644	6766								YBR229C	5591.07	2860.59	7493.85	7107.32	5393.05	7623.24	8354.1	6978.14								YBR229C	2865	2.865	1951.51	998.462	2615.65	2480.74	1882.39	2660.82	2915.92	2435.65
YBR230C	2588	4147	4954	5031	1922	1803	2998	2284								YBR230C	2832.75	2443.44	6094.98	5464.91	1800.81	2561.44	3276.5	2355.61								YBR230C	405	0.405	6994.44	6033.18	15049.3	13493.6	4446.43	6324.55	8090.13	5816.32
YBR230W-A	231	358	595	543	185	137	240	197								YBR230W-A	252.846	210.936	732.037	589.833	173.335	194.63	262.295	203.177								YBR230W-A	201	0.201	1257.94	1049.43	3641.98	2934.49	862.361	968.308	1304.95	1010.83
YBR231C	641	581	957	840	510	464	672	660								YBR231C	701.62	342.329	1177.41	912.448	477.841	659.185	734.426	680.693								YBR231C	912	0.912	769.32	375.36	1291.02	1000.49	523.949	722.79	805.292	746.374
YBR232C	2	0	3	4	1	4	0	3								YBR232C	2.18914	0	3.69094	4.34499	0.936944	5.68263	0	3.09406								YBR232C	360	0.36	6.08095	0	10.2526	12.0694	2.60262	15.7851	0	8.59461
YBR233W	1626	1239	2481	2521	1547	1449	2034	1858								YBR233W	1779.77	730.026	3052.41	2738.43	1449.45	2058.53	2222.95	1916.25								YBR233W	1242	1.242	1432.99	587.783	2457.66	2204.86	1167.03	1657.43	1789.82	1542.88
YBR233W-A	227	218	274	226	193	176	174	144								YBR233W-A	248.468	128.447	337.106	245.492	180.83	250.036	190.164	148.515								YBR233W-A	285	0.285	871.816	450.691	1182.83	861.376	634.492	877.318	667.242	521.105
YBR234C	4669	6525	6456	6315	4802	4361	5606	5066								YBR234C	5110.55	3844.57	7942.91	6859.66	4499.2	6195.48	6126.78	5224.83								YBR234C	1155	1.155	4424.72	3328.63	6876.98	5939.1	3895.41	5364.05	5304.57	4523.67
YBR235W	2608	2923	3519	3654	3291	3046	3878	3563								YBR235W	2854.64	1722.25	4329.48	3969.15	3083.48	4327.32	4238.25	3674.71								YBR235W	3363	3.363	848.838	512.117	1287.39	1180.24	916.884	1286.74	1260.26	1092.69
YBR236C	1395	1804	2336	2450	1425	1344	1764	1630								YBR236C	1526.93	1062.93	2874.02	2661.31	1335.14	1909.36	1927.87	1681.11								YBR236C	1311	1.311	1164.7	810.776	2192.23	2029.98	1018.42	1456.42	1470.53	1282.31
YBR237W	528	521	934	979	581	549	820	785								YBR237W	577.933	306.976	1149.11	1063.44	544.364	779.94	896.175	809.612								YBR237W	2550	2.55	226.641	120.383	450.633	417.034	213.476	305.859	351.441	317.495
YBR238C	6052	4932	8816	9520	7032	6882	8666	8030								YBR238C	6624.34	2905.96	10846.5	10341.1	6588.59	9776.96	9471.04	8281.77								YBR238C	2196	2.196	3016.55	1323.3	4939.19	4709.05	3000.27	4452.17	4312.86	3771.3
YBR239C	1821	1475	3283	3453	1743	1718	2346	2081								YBR239C	1993.21	869.078	4039.12	3750.81	1633.09	2440.69	2563.93	2146.25								YBR239C	1590	1.59	1253.59	546.59	2540.33	2359	1027.1	1535.02	1612.54	1349.84
YBR240C	111	163	281	286	106	118	131	133								YBR240C	121.497	96.0405	345.719	310.667	99.316	167.637	143.169	137.17								YBR240C	1353	1.353	89.7985	70.9834	255.52	229.613	73.4043	123.901	105.816	101.382
YBR241C	918	1598	2085	2154	697	629	1078	971								YBR241C	1004.82	941.551	2565.21	2339.78	653.05	893.593	1178.14	1001.44								YBR241C	1467	1.467	684.946	641.821	1748.61	1594.94	445.16	609.129	803.096	682.648
YBR242W	2343	5370	3270	3503	2732	2664	3167	3118								YBR242W	2564.58	3164.03	4023.13	3805.13	2559.73	3784.63	3461.2	3215.76								YBR242W	717	0.717	3576.82	4412.88	5611.06	5307.01	3570.06	5278.42	4827.34	4485.02
YBR243C	2975	4126	3303	3361	2952	2657	3695	3367								YBR243C	3256.35	2431.06	4063.73	3650.88	2765.86	3774.68	4038.25	3472.57								YBR243C	1347	1.347	2417.48	1804.8	3016.87	2710.38	2053.35	2802.29	2997.96	2578
YBR244W	483	883	641	585	514	469	646	548								YBR244W	528.678	520.269	788.632	635.455	481.589	666.288	706.011	565.182								YBR244W	489	0.489	1081.14	1063.94	1612.74	1299.5	984.845	1362.55	1443.79	1155.79
YBR245C	4635	3744	5944	6392	5258	5083	6676	6050								YBR245C	5073.34	2205.99	7312.99	6943.3	4926.45	7221.2	7296.17	6239.69								YBR245C	3390	3.39	1496.56	650.733	2157.22	2048.17	1453.23	2130.15	2152.26	1840.62
YBR246W	3102	2434	2794	2990	3088	2814	3693	3493								YBR246W	3395.36	1434.13	3437.5	3247.88	2893.28	3997.73	4036.07	3602.52								YBR246W	1164	1.164	2916.98	1232.07	2953.18	2790.28	2485.64	3434.47	3467.41	3094.95
YBR247C	4046	3294	4000	4453	4550	4556	5069	4893								YBR247C	4428.63	1940.84	4921.26	4837.06	4263.09	6472.51	5539.89	5046.41								YBR247C	1452	1.452	3050.02	1336.67	3389.3	3331.31	2936.02	4457.65	3815.35	3475.49
YBR248C	2836	2686	3900	3958	3386	3170	3755	3339								YBR248C	3104.2	1582.61	4798.23	4299.37	3172.49	4503.48	4103.83	3443.69								YBR248C	1659	1.659	1871.13	953.952	2892.24	2591.54	1912.29	2714.58	2473.67	2075.76
YBR249C	20946	36461	22415	23305	31376	27513	31912	29483								YBR249C	22926.9	21483	27577.5	25315	29397.5	39086.5	34876.5	30407.4								YBR249C	1113	1.113	20599.2	19301.9	24777.6	22744.8	26412.9	35118.2	31335.6	27320.2
YBR250W	148	217	90	83	122	128	151	132								YBR250W	161.996	127.858	110.728	90.1586	114.307	181.844	165.027	136.139								YBR250W	1572	1.572	103.051	81.3344	70.4379	57.3528	72.7145	115.677	104.979	86.6022
YBR251W	1268	1596	2200	2119	1125	991	1536	1293								YBR251W	1387.92	940.372	2706.69	2301.76	1054.06	1407.87	1678.69	1333.54								YBR251W	924	0.924	1502.07	1017.72	2929.32	2491.08	1140.76	1523.67	1816.76	1443.22
YBR252W	2918	5530	2526	2680	2796	2484	3159	3022								YBR252W	3193.96	3258.31	3107.78	2911.14	2619.69	3528.91	3452.46	3116.75								YBR252W	444	0.444	7193.6	7338.53	6999.49	6556.63	5900.21	7948	7775.81	7019.71
YBR253W	550	934	513	509	403	434	627	545								YBR253W	602.014	550.318	631.152	552.9	377.588	616.565	685.246	562.087								YBR253W	366	0.366	1644.85	1503.6	1724.46	1510.66	1031.66	1684.6	1872.26	1535.76
YBR254C	697	1163	1208	1292	655	565	851	793								YBR254C	762.916	685.246	1486.22	1403.43	613.698	802.671	930.055	817.863								YBR254C	528	0.528	1444.92	1297.81	2814.81	2658.02	1162.31	1520.21	1761.47	1548.98
YBR255W	447	323	1140	1317	479	488	726	645								YBR255W	489.273	190.313	1402.56	1430.59	448.796	693.28	793.443	665.223								YBR255W	2085	2.085	234.663	91.2774	672.69	686.134	215.25	332.509	380.548	319.052
YBR255C-A	391	564	531	517	302	262	335	331								YBR255C-A	427.977	332.312	653.297	561.59	282.957	372.212	366.12	341.378								YBR255C-A	363	0.363	1179	915.46	1799.72	1547.08	779.496	1025.38	1008.6	940.435
YBR256C	2146	4740	3178	3086	2579	2169	2629	2297								YBR256C	2348.95	2792.84	3909.94	3352.16	2416.38	3081.4	2873.22	2369.02								YBR256C	717	0.717	3276.08	3895.17	5453.2	4675.26	3370.12	4297.63	4007.29	3304.07
YBR257W	344	838	674	674	440	365	531	524								YBR257W	376.532	493.754	829.232	732.131	412.255	518.54	580.328	540.429								YBR257W	840	0.84	448.253	587.803	987.181	871.585	490.78	617.309	690.867	643.368
YBR258C	132	265	335	353	146	118	195	165								YBR258C	144.483	156.14	412.156	383.446	136.794	167.637	213.115	170.173								YBR258C	429	0.429	336.791	363.962	960.735	893.813	318.867	390.763	496.771	396.674
YBR259W	927	1219	1273	1417	900	920	1229	1233								YBR259W	1014.67	718.242	1566.19	1539.21	843.249	1307	1343.17	1271.66								YBR259W	2067	2.067	490.889	347.48	757.712	744.661	407.958	632.319	649.816	615.219
YBR260C	3830	2844	4907	5473	3698	3559	5128	4448								YBR260C	4192.21	1675.7	6037.16	5945.04	3464.82	5056.12	5604.37	4587.46								YBR260C	2001	2.001	2095.06	837.432	3017.07	2971.03	1731.54	2526.79	2800.79	2292.58
YBR261C	1534	1203	1915	1955	1714	1437	1762	1613								YBR261C	1679.07	708.815	2356.05	2123.62	1605.92	2041.48	1925.68	1663.57								YBR261C	699	0.699	2402.11	1014.04	3370.61	3038.08	2297.46	2920.58	2754.91	2379.93
YBR262C	337	351	671	725	248	256	329	288								YBR262C	368.87	206.811	825.541	787.53	232.362	363.688	359.563	297.03								YBR262C	321	0.321	1149.13	644.272	2571.78	2453.36	723.869	1132.98	1120.13	925.326
YBR263W	18413	25465	12548	12799	21263	19083	21371	19815								YBR263W	20154.3	15004.1	15438	13902.9	19922.2	27110.4	23356.3	20436.3								YBR263W	1473	1.473	13682.5	10186.1	10480.6	9438.49	13524.9	18404.9	15856.3	13873.9
YBR264C	246	157	354	376	216	189	322	254								YBR264C	269.264	92.5053	435.531	408.429	202.38	268.504	351.913	261.964								YBR264C	600	0.6	448.774	154.176	725.886	680.715	337.3	447.507	586.521	436.606
YBR265W	2932	3961	3945	4022	2686	2369	3275	3197								YBR265W	3209.28	2333.84	4853.59	4368.89	2516.63	3365.53	3579.23	3297.24								YBR265W	963	0.963	3332.59	2423.51	5040.08	4536.75	2613.32	3494.84	3716.75	3423.92
YBR267W	3659	2321	4275	4856	3624	3835	4808	4427								YBR267W	4005.04	1367.55	5259.6	5274.82	3395.48	5448.22	5254.64	4565.8								YBR267W	1182	1.182	3388.35	1156.98	4449.74	4462.62	2872.66	4609.32	4445.55	3862.78
YBR266C	0	0	1	3	0	1	3	3								YBR266C	0	0	1.23031	3.25874	0	1.42066	3.27869	3.09406								YBR266C	453	0.453	0	0	2.71593	7.1937	0	3.13611	7.23772	6.83015
YBR268W	1087	2152	1319	1487	890	884	1332	1155								YBR268W	1189.8	1267.97	1622.79	1615.25	833.88	1255.86	1455.74	1191.21								YBR268W	318	0.318	3741.51	3987.33	5103.1	5079.41	2622.26	3949.25	4577.79	3745.95
YBR269C	765	778	1480	1525	566	486	634	565								YBR269C	837.347	458.402	1820.87	1656.53	530.31	690.439	692.896	582.715								YBR269C	417	0.417	2008.03	1099.29	4366.59	3972.49	1271.73	1655.73	1661.62	1397.4
YBR270C	313	189	425	488	286	279	386	381								YBR270C	342.601	111.36	522.884	530.089	267.966	396.363	421.858	392.946								YBR270C	1638	1.638	209.158	67.9853	319.221	323.62	163.593	241.98	257.545	239.893
YBR271W	1242	837	1302	1430	1265	1296	1584	1407								YBR271W	1359.46	493.165	1601.87	1553.33	1185.23	1841.17	1731.15	1451.11								YBR271W	1260	1.26	1078.93	391.401	1271.33	1232.81	940.662	1461.25	1373.93	1151.68
YBR272C	673	563	1305	1296	720	626	900	836								YBR272C	736.646	331.723	1605.56	1407.78	674.599	889.331	983.607	862.211								YBR272C	1443	1.443	510.496	229.884	1112.65	975.591	467.498	616.307	681.64	597.513
YBR273C	1763	1381	3408	3513	1757	1503	2492	2043								YBR273C	1929.73	813.693	4192.91	3815.99	1646.21	2135.25	2723.5	2107.05								YBR273C	1311	1.311	1471.95	620.666	3198.26	2910.75	1255.69	1628.72	2077.42	1607.21
YBR274W	1244	1856	1340	1397	1288	1192	1589	1488								YBR274W	1361.65	1093.57	1648.62	1517.49	1206.78	1693.42	1736.61	1534.65								YBR274W	1584	1.584	859.625	690.382	1040.8	958.01	761.858	1069.08	1096.35	968.847
YBR275C	2819	3018	6479	7019	3418	3432	5613	4809								YBR275C	3085.6	1778.22	7971.21	7624.38	3202.47	4875.69	6134.43	4959.78								YBR275C	5751	5.751	536.532	309.202	1386.06	1325.75	556.855	847.799	1066.67	862.42
YBR276C	3975	2171	4794	4960	3958	3908	5224	4729								YBR276C	4350.92	1279.17	5898.13	5387.79	3708.42	5551.92	5709.29	4877.27								YBR276C	2424	2.424	1794.93	527.709	2433.22	2222.69	1529.88	2290.4	2355.32	2012.07
YBR277C	16	16	2	8	10	9	21	8								YBR277C	17.5131	9.42729	2.46063	8.68998	9.36944	12.7859	22.9508	8.25083								YBR277C	402	0.402	43.565	23.451	6.12097	21.6169	23.3071	31.8057	57.0916	20.5244
YBR278W	553	906	961	895	548	480	689	651								YBR278W	605.298	533.82	1182.33	972.192	513.445	681.915	753.005	671.411								YBR278W	606	0.606	998.841	880.892	1951.04	1604.28	847.269	1125.27	1242.58	1107.94
YBR279W	1610	1507	2938	3332	1784	1748	2372	2040								YBR279W	1762.26	887.933	3614.67	3619.38	1671.51	2483.31	2592.35	2103.96								YBR279W	1338	1.338	1317.08	663.627	2701.54	2705.07	1249.26	1855.98	1937.48	1572.47
YBR280C	671	546	1376	1376	617	563	844	739								YBR280C	734.457	321.706	1692.91	1494.68	578.094	799.83	922.404	762.17								YBR280C	1914	1.914	383.729	168.081	884.49	780.918	302.035	417.884	481.925	398.208
YBR281C	2957	2987	4180	4190	3740	3277	4488	4236								YBR281C	3236.65	1759.96	5142.72	4551.38	3504.17	4655.49	4904.92	4368.81								YBR281C	2637	2.637	1227.4	667.409	1950.21	1725.97	1328.85	1765.45	1860.04	1656.74
YBR282W	1255	2040	2574	2522	1001	991	1487	1227								YBR282W	1373.69	1201.98	3166.83	2739.52	937.881	1407.87	1625.14	1265.47								YBR282W	441	0.441	3114.94	2725.58	7181.02	6212.06	2126.71	3192.45	3685.12	2869.55
YBR283C	21091	25843	20890	21414	23275	21937	28881	26746								YBR283C	23085.6	15226.8	25701.3	23260.9	21807.4	31164.9	31563.9	27584.6								YBR283C	1473	1.473	15672.5	10337.3	17448.3	15791.5	14804.7	21157.5	21428.3	18726.8
YBR284W	149	102	448	462	176	147	242	206								YBR284W	163.091	60.099	551.181	501.847	164.902	208.836	264.481	212.459								YBR284W	2394	2.394	68.1249	25.104	230.234	209.627	68.8814	87.2333	110.477	88.7463
YBR285W	37	65	337	351	37	29	29	43								YBR285W	40.4991	38.2984	414.616	381.273	34.6669	41.199	31.694	44.3482								YBR285W	435	0.435	93.1014	88.0422	953.141	876.49	79.6941	94.7104	72.8597	101.95
YBR286W	47817	58780	64294	65398	52388	46383	63968	59872								YBR286W	52339.1	34633.5	79101.9	71038.5	49084.6	65894.3	69910.4	61749.2								YBR286W	1614	1.614	32428.2	21458.2	49009.8	44013.9	30411.8	40826.7	43315	38258.5
YBR287W	4368	6084	8830	8784	4731	4400	6197	5421								YBR287W	4781.09	3584.73	10863.7	9541.6	4432.68	6250.89	6772.68	5590.97								YBR287W	1284	1.284	3723.59	2791.84	8460.81	7431.16	3452.24	4868.29	5274.67	4354.33
YBR288C	1891	3311	3220	3303	1992	1748	2745	2563								YBR288C	2069.83	1950.86	3961.61	3587.88	1866.39	2483.31	3000	2643.36								YBR288C	1452	1.452	1425.51	1343.57	2728.38	2470.99	1285.39	1710.27	2066.12	1820.49
YBR289W	2243	1461	5274	5967	2566	2402	3962	3536								YBR289W	2455.12	860.83	6488.68	6481.64	2404.2	3412.42	4330.05	3646.86								YBR289W	2718	2.718	903.283	316.714	2387.3	2384.71	884.547	1255.49	1593.1	1341.75
YBR290W	969	1709	2660	3024	1108	1044	1591	1441								YBR290W	1060.64	1006.95	3272.64	3284.81	1038.13	1483.17	1738.8	1486.18								YBR290W	966	0.966	1097.97	1042.39	3387.82	3400.43	1074.67	1535.37	1800	1538.49
YBR291C	1445	1655	2029	1901	1709	1487	1729	1656								YBR291C	1581.65	975.136	2496.31	2064.96	1601.24	2112.52	1889.62	1707.92								YBR291C	900	0.9	1757.39	1083.48	2773.68	2294.4	1779.15	2347.24	2099.57	1897.69
YBR292C	207	272	287	260	185	203	255	264								YBR292C	226.576	160.264	353.1	282.425	173.335	288.393	278.689	272.277								YBR292C	372	0.372	609.076	430.817	949.195	759.206	465.953	775.251	749.163	731.928
YBR293W	466	676	599	647	525	477	660	586								YBR293W	510.07	398.303	736.959	702.803	491.895	677.653	721.311	604.373								YBR293W	1425	1.425	357.944	279.511	517.164	493.195	345.19	475.546	506.183	424.121
YBR294W	43	89	175	209	170	115	182	197								YBR294W	47.0665	52.4393	215.305	227.026	159.28	163.375	198.907	203.177								YBR294W	2580	2.58	18.2428	20.3253	83.4516	87.9945	61.7366	63.3238	77.0958	78.7506
YBR295W	1238	669	3990	4443	1285	1257	1905	1703								YBR295W	1355.08	394.179	4908.96	4826.2	1203.97	1785.77	2081.97	1756.39								YBR295W	3651	3.651	371.153	107.965	1344.55	1321.88	329.765	489.117	570.246	481.072
YBR296C	695	502	3383	3939	892	1348	1860	1485								YBR296C	760.727	295.781	4162.16	4278.73	835.754	1915.04	2032.79	1531.56								YBR296C	1725	1.725	441.001	171.467	2412.84	2480.42	484.495	1110.17	1178.43	887.861
YBR296C-A	1	7	3	5	0	1	2	0								YBR296C-A	1.09457	4.12444	3.69094	5.43124	0	1.42066	2.18579	0								YBR296C-A	120	0.12	9.12142	34.3703	30.7579	45.2603	0	11.8388	18.2149	0
YBR297W	691	545	1364	1440	807	694	931	742								YBR297W	756.349	321.117	1678.15	1564.2	756.114	985.936	1017.49	765.264								YBR297W	1407	1.407	537.561	228.228	1192.71	1111.73	537.394	700.736	723.16	543.898
YBR298C	156	87	269	178	193	179	223	191								YBR298C	170.753	51.2609	330.955	193.352	180.83	254.297	243.716	196.988								YBR298C	1845	1.845	92.5491	27.7837	179.379	104.798	98.0109	137.831	132.095	106.769
YBR298C-A	1	0	0	1	1	0	0	0								YBR298C-A	1.09457	0	0	1.08625	0.936944	0	0	0								YBR298C-A	222	0.222	4.9305	0	0	4.89301	4.22047	0	0	0
YBR299W	140	111	362	323	126	118	140	142								YBR299W	153.24	65.4018	445.374	350.858	118.055	167.637	153.005	146.452								YBR299W	1755	1.755	87.3162	37.266	253.774	199.919	67.2678	95.5199	87.1826	83.4485
YBR300C	17	27	11	8	10	18	15	20								YBR300C	18.6077	15.9086	13.5335	8.68998	9.36944	25.5718	16.3934	20.6271								YBR300C	498	0.498	37.3649	31.9449	27.1756	17.4498	18.8141	51.349	32.9186	41.4198
YBR301W	52	133	59	58	60	38	69	57								YBR301W	56.9177	78.3644	72.5886	63.0024	56.2166	53.9849	75.4098	58.7871								YBR301W	363	0.363	156.798	215.88	199.969	173.56	154.867	148.719	207.741	161.948
YBR302C	1172	2098	1989	1925	1147	1117	1526	1391								YBR302C	1282.84	1236.15	2447.1	2091.03	1074.67	1586.87	1667.76	1434.61								YBR302C	1140	1.14	1125.3	1084.35	2146.58	1834.23	942.697	1391.99	1462.95	1258.43
YDR293C	10103	4536	15980	17382	10211	10093	14440	12054								YDR293C	11058.5	2672.64	19660.4	18881.2	9567.13	14338.7	15781.4	12431.9								YDR293C	3753	3.753	2946.56	712.134	5238.59	5030.95	2549.2	3820.59	4205.01	3312.53
YDL183C	259	254	506	495	245	279	326	323								YDL183C	283.494	149.658	622.539	537.693	229.551	396.363	356.284	333.127								YDL183C	963	0.963	294.386	155.408	646.458	558.352	238.371	411.592	369.973	345.926
YDL112W	6880	6306	9731	11106	9647	9170	12706	11666								YDL112W	7530.65	3715.53	11972.2	12063.9	9038.7	13027.4	13886.3	12031.8								YDL112W	4311	4.311	1746.84	861.872	2777.13	2798.39	2096.66	3021.9	3221.14	2790.95
YDL033C	966	833	1180	1263	957	966	1255	1159								YDL033C	1057.36	490.808	1451.77	1371.93	896.655	1372.35	1371.58	1195.34								YDL033C	1254	1.254	843.186	391.394	1157.71	1094.04	715.036	1094.38	1093.77	953.22
YDR036C	4879	5268	4885	4995	4448	4426	5775	5191								YDR036C	5340.41	3103.94	6010.09	5425.81	4167.53	6287.82	6311.48	5353.75								YDR036C	1503	1.503	3553.17	2065.16	3998.73	3609.99	2772.8	4183.52	4199.25	3562.05
YDR100W	940	1431	2273	2242	835	777	1031	866								YDR100W	1028.9	843.153	2796.51	2435.37	782.348	1103.85	1126.78	893.152								YDR100W	432	0.432	2381.71	1951.74	6473.39	5637.43	1810.99	2555.21	2608.28	2067.48
YDR166C	2367	3959	5157	5633	2813	2639	4280	3835								YDR166C	2590.85	2332.67	6344.73	6118.84	2635.62	3749.11	4677.6	3955.24								YDR166C	2916	2.916	888.494	799.954	2175.83	2098.37	903.849	1285.7	1604.11	1356.39
YDR351W	2008	2528	5302	5951	2188	2215	3281	3032								YDR351W	2197.9	1489.51	6523.13	6464.26	2050.03	3146.75	3585.79	3127.06								YDR351W	2595	2.595	846.974	573.993	2513.73	2491.05	789.993	1212.62	1381.81	1205.03
YDR420W	10487	4796	18711	21250	10309	11743	16842	14314								YDR420W	11478.8	2825.83	23020.4	23082.8	9658.95	16682.8	18406.6	14762.8								YDR420W	5409	5.409	2122.16	522.431	4255.95	4267.47	1785.72	3084.26	3402.95	2729.3
YDR496C	5078	9157	7158	8017	6793	6649	8261	7808								YDR496C	5558.23	5395.36	8806.59	8708.45	6364.66	9445.94	9028.42	8052.81								YDR496C	1971	1.971	2820.01	2737.37	4468.08	4418.29	3229.15	4792.46	4580.63	4085.64
YDL248W	786	1223	1568	1581	933	857	1164	1172								YDL248W	860.333	720.599	1929.13	1717.36	874.168	1217.5	1272.13	1208.75								YDL248W	1152	1.152	746.817	625.52	1674.6	1490.76	758.827	1056.86	1104.28	1049.26
YDL247W-A	29	22	37	37	26	29	49	31								YDL247W-A	31.7426	12.9625	45.5217	40.1912	24.3605	41.199	53.5519	31.9719								YDL247W-A	75	0.075	423.234	172.834	606.955	535.882	324.807	549.32	714.026	426.293
YDL247W	50	18	38	42	46	51	78	58								YDL247W	54.7285	10.6057	46.752	45.6224	43.0994	72.4535	85.2459	59.8185								YDL247W	1830	1.83	29.9063	5.79547	25.5475	24.9303	23.5516	39.5921	46.5825	32.6877
YDL246C	78	109	124	107	68	73	86	91								YDL246C	85.3765	64.2234	152.559	116.229	63.7122	103.708	93.9891	93.8531								YDL246C	1074	1.074	79.494	59.7983	142.048	108.22	59.3223	96.5623	87.5131	87.3865
YDL245C	2	2	7	1	0	1	2	1								YDL245C	2.18914	1.17841	8.6122	1.08625	0	1.42066	2.18579	1.03135								YDL245C	1704	1.704	1.28471	0.691556	5.05411	0.63747	0	0.833719	1.28274	0.605254
YDL244W	76	123	172	225	75	92	90	83								YDL244W	83.1874	72.4723	211.614	244.406	70.2708	130.7	98.3607	85.6023								YDL244W	1023	1.023	81.3171	70.8429	206.856	238.911	68.6909	127.762	96.1492	83.6777
YDL243C	285	291	342	299	283	314	348	281								YDL243C	311.953	171.459	420.768	324.788	265.155	446.086	380.328	289.81								YDL243C	990	0.99	315.104	173.191	425.018	328.069	267.833	450.592	384.17	292.738
YDL242W	3	1	12	8	11	10	16	13								YDL242W	3.28371	0.589206	14.7638	8.68998	10.3064	14.2066	17.4863	13.4076								YDL242W	354	0.354	9.27602	1.66442	41.7056	24.548	29.1141	40.1315	49.3964	37.8746
YDL241W	350	539	643	739	595	563	569	563								YDL241W	383.1	317.582	791.093	802.737	557.481	799.83	621.858	580.652								YDL241W	372	0.372	1029.84	853.715	2126.59	2157.9	1498.61	2150.08	1671.66	1560.89
YDL240C-A	0	0	0	0	0	1	0	0								YDL240C-A	0	0	0	0	0	1.42066	0	0								YDL240C-A	138	0.138	0	0	0	0	0	10.2946	0	0
YDL240W	2341	2856	3963	3977	2338	2246	3447	3080								YDL240W	2562.39	1682.77	4875.74	4320.01	2190.57	3190.79	3767.21	3176.57								YDL240W	3054	3.054	839.028	551.006	1596.51	1414.54	717.28	1044.79	1233.53	1040.13
YDL239C	176	162	327	321	230	186	334	310								YDL239C	192.644	95.4513	402.313	348.686	215.497	264.242	365.027	319.719								YDL239C	2373	2.373	81.1818	40.2239	169.538	146.939	90.8121	111.354	153.825	134.732
YDL238C	431	391	822	821	448	344	554	505								YDL238C	471.76	230.379	1011.32	891.81	419.751	488.706	605.464	520.833								YDL238C	1470	1.47	320.925	156.721	687.972	606.673	285.545	332.453	411.881	354.308
YDL237W	4758	6158	5921	5983	4673	4204	5949	5343								YDL237W	5207.97	3628.33	7284.69	6499.02	4378.34	5972.44	6501.64	5510.52								YDL237W	1173	1.173	4439.87	3093.2	6210.31	5540.51	3732.6	5091.59	5542.74	4697.8
YDL236W	3477	3684	4817	5000	3357	3034	4395	4006								YDL236W	3805.82	2170.63	5926.43	5431.24	3145.32	4310.27	4803.28	4131.6								YDL236W	939	0.939	4053.06	2311.64	6311.42	5784.07	3349.65	4590.28	5115.31	4400
YDL235C	2654	5298	4370	4469	2897	2561	3473	3145								YDL235C	2904.99	3121.61	5376.48	4854.44	2714.33	3638.3	3795.63	3243.61								YDL235C	504	0.504	5763.87	6193.67	10667.6	9631.83	5385.57	7218.85	7531.01	6435.73
YDL234C	1664	1712	5965	6975	1740	1570	2790	2487								YDL234C	1821.37	1008.72	7338.83	7576.58	1630.28	2230.43	3049.18	2564.98								YDL234C	2241	2.241	812.747	450.121	3274.8	3380.89	727.48	995.284	1360.63	1144.57
YDL233W	952	775	2371	2479	1030	914	1245	1167								YDL233W	1042.03	456.634	2917.08	2692.81	965.052	1298.48	1360.66	1203.59								YDL233W	1377	1.377	756.74	331.615	2118.43	1955.56	700.837	942.977	988.131	874.066
YDL232W	503	959	560	588	548	485	585	461								YDL232W	550.569	565.048	688.976	638.714	513.445	689.018	639.344	475.454								YDL232W	111	0.111	4960.08	5090.53	6206.99	5754.18	4625.63	6207.37	5759.86	4283.37
YDL231C	2367	1654	3192	3405	2680	2546	3670	3242								YDL231C	2590.85	974.546	3927.17	3698.67	2511.01	3616.99	4010.93	3343.65								YDL231C	3378	3.378	766.977	288.498	1162.57	1094.93	743.342	1070.75	1187.37	989.83
YDL230W	971	773	1510	1441	871	802	1108	1017								YDL230W	1062.83	455.456	1857.78	1565.28	816.078	1139.37	1210.93	1048.89								YDL230W	1008	1.008	1054.39	451.841	1843.03	1552.86	809.601	1130.32	1201.32	1040.56
YDL229W	254217	283926	199851	203345	297063	278412	352143	340067								YDL229W	278259	167291	245880	220883	278331	395528	384856	350729								YDL229W	1842	1.842	151063	90820.2	133485	119915	151103	214727	208934	190407
YDL228C	11	3	6	3	4	7	10	3								YDL228C	12.0403	1.76762	7.38189	3.25874	3.74777	9.94459	10.929	3.09406								YDL228C	642	0.642	18.7543	2.7533	11.4983	5.07593	5.83766	15.49	17.0233	4.81941
YDL227C	2827	3669	1340	1333	2682	2709	3736	3385								YDL227C	3094.35	2161.8	1648.62	1447.97	2512.88	3848.56	4083.06	3491.13								YDL227C	1761	1.761	1757.16	1227.6	936.185	822.242	1426.96	2185.44	2318.6	1982.47
YDL226C	4073	3468	4696	4669	3961	3520	4848	4470								YDL226C	4458.19	2043.37	5777.56	5071.69	3711.23	5000.71	5298.36	4610.15								YDL226C	1059	1.059	4209.81	1929.52	5455.67	4789.13	3504.47	4722.11	5003.17	4353.3
YDL225W	2545	3469	4617	5101	3039	2884	4310	3613								YDL225W	2785.68	2043.95	5680.36	5540.95	2847.37	4097.17	4710.38	3726.28								YDL225W	1656	1.656	1682.18	1234.27	3430.17	3345.99	1719.43	2474.14	2844.43	2250.17
YDL224C	6241	4207	10403	10522	5381	5756	8169	7273								YDL224C	6831.22	2478.79	12799	11429.5	5041.69	8177.3	8927.87	7501.03								YDL224C	1950	1.95	3503.19	1271.17	6563.57	5861.28	2585.48	4193.49	4578.39	3846.68
YDL223C	802	265	5233	6458	651	762	1050	931								YDL223C	877.846	156.14	6438.24	7014.99	609.95	1082.54	1147.54	960.19								YDL223C	3141	3.141	279.48	49.7101	2049.74	2233.36	194.19	344.648	365.343	305.696
YDL222C	251	259	1630	1706	224	235	277	266								YDL222C	274.737	152.604	2005.41	1853.14	209.875	333.854	302.732	274.34								YDL222C	930	0.93	295.416	164.091	2156.36	1992.62	225.672	358.983	325.519	294.989
YDL221W	24	22	98	95	20	12	15	16								YDL221W	26.2697	12.9625	120.571	103.194	18.7389	17.0479	16.3934	16.5017								YDL221W	552	0.552	47.59	23.4828	218.425	186.945	33.9472	30.8838	29.6983	29.8943
YDL220C	1962	1330	2520	2659	1819	2030	2746	2418								YDL220C	2147.55	783.644	3100.39	2888.33	1704.3	2883.93	3001.09	2493.81								YDL220C	2775	2.775	773.891	282.394	1117.26	1040.84	614.162	1039.25	1081.47	898.671
YDL219W	708	1349	921	857	814	658	904	871								YDL219W	774.956	794.839	1133.12	930.915	762.672	934.792	987.978	898.309								YDL219W	453	0.453	1710.72	1754.61	2501.37	2055	1683.6	2063.56	2180.97	1983.02
YDL218W	67	107	348	342	86	82	106	82								YDL218W	73.3363	63.045	428.15	371.497	80.5772	116.494	115.847	84.571								YDL218W	954	0.954	76.8724	66.0849	448.794	389.41	84.4624	122.111	121.433	88.6488
YDL217C	1106	824	1405	1384	1020	1114	1124	1058								YDL217C	1210.6	485.506	1728.59	1503.37	955.683	1582.61	1228.42	1091.17								YDL217C	624	0.624	1940.06	778.054	2770.18	2409.24	1531.54	2536.24	1968.61	1748.67
YDL216C	173	243	496	415	198	166	296	237								YDL216C	189.361	143.177	610.236	450.793	185.515	235.829	323.497	244.431								YDL216C	1323	1.323	143.13	108.221	461.252	340.735	140.223	178.253	244.518	184.755
YDL215C	1629	1860	6469	6940	2036	1687	2803	2419								YDL215C	1783.06	1095.92	7958.91	7538.56	1907.62	2396.65	3063.39	2494.84								YDL215C	3279	3.279	543.78	334.225	2427.24	2299.04	581.768	730.908	934.245	760.855
YDL214C	129	62	270	251	125	165	186	171								YDL214C	141.2	36.5308	332.185	272.648	117.118	234.408	203.279	176.361								YDL214C	2100	2.1	67.2379	17.3956	158.183	129.833	55.7705	111.623	96.7994	83.9816
YDL213C	2000	1919	3132	3487	2439	2528	3119	3037								YDL213C	2189.14	1130.69	3853.35	3787.75	2285.21	3591.42	3408.74	3132.22								YDL213C	678	0.678	3228.82	1667.68	5683.4	5586.65	3370.51	5297.08	5027.64	4619.79
YDL212W	7643	15909	9226	8823	8192	7713	9576	9019								YDL212W	8365.81	9373.67	11350.9	9583.97	7675.44	10957.5	10465.6	9301.77								YDL212W	633	0.633	13216.1	14808.3	17931.9	15140.5	12125.5	17310.5	16533.3	14694.7
YDL211C	1010	1007	2093	2176	935	965	1405	1257								YDL211C	1105.52	593.33	2575.05	2363.68	876.042	1370.93	1535.52	1296.41								YDL211C	1119	1.119	987.951	530.233	2301.21	2112.31	782.88	1225.14	1372.22	1158.54
YDL210W	97	116	139	151	151	121	154	112								YDL210W	106.173	68.3479	171.014	164.023	141.478	171.899	168.306	115.512								YDL210W	1716	1.716	61.8726	39.8298	99.6584	95.5848	82.4467	100.174	98.0804	67.3144
YDL209C	473	392	877	1011	486	473	585	566								YDL209C	517.732	230.969	1078.99	1098.2	455.355	671.97	639.344	583.746								YDL209C	1020	1.02	507.58	226.44	1057.83	1076.66	446.426	658.795	626.808	572.3
YDL208W	6729	14335	8556	8856	8223	7701	9860	9361								YDL208W	7365.37	8446.26	10526.6	9619.81	7704.49	10940.5	10776	9654.5								YDL208W	471	0.471	15637.7	17932.6	22349.4	20424.2	16357.7	23228.2	22878.9	20497.9
YDL207W	1679	1533	2668	2982	1733	1699	2743	2397								YDL207W	1837.78	903.252	3282.48	3239.19	1623.72	2413.7	2997.81	2472.15								YDL207W	1617	1.617	1136.54	558.598	2029.98	2003.21	1004.16	1492.7	1853.94	1528.85
YDL206W	804	1205	1332	1304	834	734	1116	905								YDL206W	880.035	709.993	1638.78	1416.47	781.411	1042.76	1219.67	933.375								YDL206W	2289	2.289	384.463	310.176	715.937	618.815	341.377	455.553	532.841	407.765
YDL205C	4215	5577	6080	6277	4087	4000	5621	5171								YDL205C	4613.62	3286	7480.31	6818.38	3829.29	5682.63	6143.17	5333.13								YDL205C	984	0.984	4688.63	3339.43	7601.95	6929.25	3891.55	5775.03	6243.06	5419.84
YDL204W	693	505	11009	11845	623	624	1088	917								YDL204W	758.538	297.549	13544.5	12866.6	583.716	886.49	1189.07	945.751								YDL204W	1182	1.182	641.741	251.733	11459	10885.5	493.837	749.991	1005.98	800.128
YDL203C	3063	2021	3078	3173	2655	2839	3517	3233								YDL203C	3352.67	1190.78	3786.91	3446.67	2487.59	4033.24	3843.72	3334.36								YDL203C	1872	1.872	1790.96	636.103	2022.92	1841.17	1328.84	2154.51	2053.27	1781.18
YDL202W	1548	1451	2411	2331	1321	1357	1975	1671								YDL202W	1694.4	854.938	2966.29	2532.04	1237.7	1927.83	2158.47	1723.39								YDL202W	750	0.75	2259.19	1139.92	3955.05	3376.06	1650.27	2570.44	2877.96	2297.85
YDL201W	2857	3479	2871	2869	2900	2920	3574	3415								YDL201W	3127.19	2049.85	3532.23	3116.45	2717.14	4148.32	3906.01	3522.07								YDL201W	861	0.861	3632.04	2380.77	4102.48	3619.57	3155.79	4818.02	4536.6	4090.67
YDL200C	282	552	346	369	276	271	343	288								YDL200C	308.669	325.242	425.689	400.826	258.596	384.998	374.863	297.03								YDL200C	567	0.567	544.39	573.618	750.774	706.923	456.078	679.009	661.135	523.862
YDL199C	423	398	1259	1288	379	305	513	464								YDL199C	463.004	234.504	1548.97	1399.09	355.102	433.3	560.656	478.548								YDL199C	2064	2.064	224.323	113.616	750.468	677.852	172.045	209.932	271.636	231.855
YDL198C	5295	5150	5509	5899	6372	6231	7330	6366								YDL198C	5795.75	3034.41	6777.81	6407.78	5970.21	8852.11	8010.93	6565.59								YDL198C	903	0.903	6418.33	3360.37	7505.87	7096.1	6611.52	9803	8871.46	7270.87
YDL197C	1356	622	1613	1604	1291	1172	1700	1561								YDL197C	1484.24	366.486	1984.5	1742.34	1209.59	1665.01	1857.92	1609.94								YDL197C	1578	1.578	940.582	232.247	1257.6	1104.15	766.536	1055.14	1177.39	1020.24
YDL196W	45	30	67	33	27	42	54	47								YDL196W	49.2557	17.6762	82.4311	35.8462	25.2975	59.6676	59.0164	48.4736								YDL196W	330	0.33	149.26	53.5642	249.791	108.625	76.659	180.811	178.838	146.89
YDL195W	41890	30646	45019	49232	42872	45424	61409	55784								YDL195W	45851.6	18056.8	55387.5	53478.2	40168.6	64531.9	67113.7	57533								YDL195W	3822	3.822	11996.7	4724.44	14491.8	13992.2	10509.9	16884.3	17559.8	15053.1
YDL194W	723	443	1403	1549	734	692	894	779								YDL194W	791.375	261.018	1726.13	1682.6	687.717	983.094	977.049	803.424								YDL194W	2655	2.655	298.07	98.3119	650.144	633.747	259.027	370.28	368.003	302.608
YDL193W	2006	2055	2877	2713	2057	1882	2418	2257								YDL193W	2195.71	1210.82	3539.62	2946.99	1927.29	2673.68	2642.62	2327.76								YDL193W	1128	1.128	1946.55	1073.42	3137.96	2612.58	1708.59	2370.28	2342.75	2063.62
YDL192W	21625	40963	23843	23825	23135	21087	27769	24681								YDL192W	23670.1	24135.6	29334.4	25879.9	21676.2	29957.4	30348.6	25454.8								YDL192W	546	0.546	43351.8	44204.5	53726	47399	39700	54867	55583.6	46620.6
YDL191W	39386	74643	31212	32206	40706	36952	42326	40669								YDL191W	43110.8	43980.1	38400.6	34983.7	38139.2	52496.1	46257.9	41944.1								YDL191W	363	0.363	118762	121157	105787	96373.8	105067	144617	127432	115548
YDL190C	4620	6592	8792	9568	5987	5029	7807	6827								YDL190C	5056.92	3884.04	10816.9	10393.2	5609.48	7144.48	8532.24	7041.05								YDL190C	2886	2.886	1752.22	1345.82	3748.07	3601.25	1943.69	2475.57	2956.42	2439.73
YDL189W	2370	1622	3345	3432	2406	2327	3244	2925								YDL189W	2594.13	955.692	4115.4	3728	2254.29	3305.87	3545.36	3016.71								YDL189W	1374	1.374	1888.02	695.554	2995.2	2713.25	1640.67	2406.02	2580.32	2195.57
YDL188C	4490	4577	5572	5622	4020	3861	5511	4762								YDL188C	4914.62	2696.79	6855.31	6106.89	3766.51	5485.15	6022.95	4911.3								YDL188C	1134	1.134	4333.88	2378.13	6045.25	5385.26	3321.44	4837	5311.24	4330.96
YDL187C	64	87	57	61	59	53	88	62								YDL187C	70.0525	51.2609	70.128	66.2611	55.2797	75.2948	96.1749	63.9439								YDL187C	330	0.33	212.28	155.336	212.509	200.791	167.514	228.166	291.439	193.769
YDL186W	14	20	13	8	6	11	9	11								YDL186W	15.324	11.7841	15.9941	8.68998	5.62166	15.6272	9.83607	11.3449								YDL186W	834	0.834	18.3741	14.1296	19.1776	10.4196	6.7406	18.7377	11.7938	13.603
YDL185C-A	1	0	0	0	1	1	0	0								YDL185C-A	1.09457	0	0	0	0.936944	1.42066	0	0								YDL185C-A	228	0.228	4.80075	0	0	0	4.1094	6.23095	0	0
YDL185W	52467	51038	52288	54156	62287	54413	64116	61241								YDL185W	57428.9	30071.9	64330.7	58826.9	58359.4	77302.2	70072.1	63161.1								YDL185W	3216	3.216	17857.2	9350.71	20003.3	18291.9	18146.6	24036.7	21788.6	19639.6
YDL184C	930	1019	689	849	998	919	848	554								YDL184C	1017.95	600.401	847.687	922.225	935.07	1305.58	926.776	571.37								YDL184C	78	0.078	13050.7	7697.44	10867.8	11823.4	11988.1	16738.2	11881.7	7325.25
YDL182W	6048	6504	5406	5418	7550	7934	8065	7415								YDL182W	6619.96	3832.19	6651.08	5885.29	7073.92	11271.5	8814.21	7647.48								YDL182W	1287	1.287	5143.72	2977.62	5167.9	4572.88	5496.45	8757.95	6848.65	5942.1
YDL181W	2288	3638	3828	3856	1385	1255	1958	1528								YDL181W	2504.38	2143.53	4709.65	4188.57	1297.67	1782.92	2139.89	1575.91								YDL181W	258	0.258	9706.89	8308.26	18254.4	16234.8	5029.72	6910.56	8294.15	6108.17
YDL180W	2141	1987	2744	2805	2205	1897	2962	2524								YDL180W	2343.48	1170.75	3375.98	3046.93	2065.96	2694.99	3237.16	2603.14								YDL180W	1644	1.644	1425.47	712.136	2053.52	1853.36	1256.67	1639.29	1969.07	1583.42
YDL179W	2391	3876	5714	6339	2486	2346	3945	3238								YDL179W	2617.12	2283.76	7030.02	6885.73	2329.24	3332.86	4311.48	3339.52								YDL179W	915	0.915	2860.24	2495.91	7683.08	7525.38	2545.62	3642.47	4711.99	3649.75
YDL178W	1820	2509	2274	2302	1872	1694	2114	1863								YDL178W	1992.12	1478.32	2797.74	2500.54	1753.96	2406.59	2310.38	1921.41								YDL178W	1593	1.593	1250.55	928.008	1756.27	1569.71	1101.04	1510.73	1450.33	1206.16
YDL177C	444	683	380	426	384	400	467	424								YDL177C	485.989	402.428	467.52	462.742	359.786	568.263	510.383	437.294								YDL177C	513	0.513	947.348	784.459	911.344	902.031	701.338	1107.72	994.898	852.424
YDL176W	624	530	899	866	663	614	911	768								YDL176W	683.012	312.279	1106.05	940.691	621.194	872.283	995.628	792.079								YDL176W	2127	2.127	321.115	146.817	520.006	442.262	292.052	410.1	468.09	372.393
YDL175C	981	680	1603	1636	927	957	1240	1205								YDL175C	1073.77	400.66	1972.19	1777.1	868.547	1359.57	1355.19	1242.78								YDL175C	1035	1.035	1037.46	387.111	1905.5	1717.01	839.176	1313.59	1309.36	1200.75
YDL174C	4828	5596	8252	8312	5096	4743	7304	6413								YDL174C	5284.59	3297.2	10152.6	9028.89	4774.67	6738.17	7982.51	6614.07								YDL174C	1764	1.764	2995.8	1869.16	5755.42	5118.42	2706.73	3819.83	4525.23	3749.47
YDL173W	2404	1805	3222	3382	2304	2116	2874	2637								YDL173W	2631.35	1063.52	3964.07	3673.69	2158.72	3006.11	3140.98	2719.68								YDL173W	888	0.888	2963.23	1197.65	4464.05	4137.04	2430.99	3385.26	3537.14	3062.7
YDL172C	39	36	19	18	29	27	39	35								YDL172C	42.6883	21.2114	23.376	19.5525	27.1714	38.3577	42.623	36.0974								YDL172C	480	0.48	88.9339	44.1904	48.7	40.7343	56.607	79.9119	88.7978	75.2028
YDL171C	35010	31674	21386	21504	50467	45821	51258	46756								YDL171C	38320.9	18662.5	26311.5	23358.7	47284.7	65095.9	56019.7	48221.9								YDL171C	6438	6.438	5952.3	2898.8	4086.91	3628.25	7344.63	10111.2	8701.41	7490.21
YDL170W	1205	839	1274	1381	1385	1134	1568	1534								YDL170W	1318.96	494.344	1567.42	1500.11	1297.67	1611.02	1713.66	1582.1								YDL170W	1587	1.587	831.101	311.496	987.663	945.248	817.686	1015.14	1079.81	996.91
YDL169C	67	36	255	257	52	29	51	52								YDL169C	73.3363	21.2114	313.73	279.166	48.7211	41.199	55.7377	53.6304								YDL169C	672	0.672	109.131	31.5646	466.861	415.425	72.5016	61.3081	82.943	79.8071
YDL168W	2366	1988	2896	2980	2465	2128	2924	2582								YDL168W	2589.75	1171.34	3562.99	3237.02	2309.57	3023.16	3195.63	2662.95								YDL168W	1161	1.161	2230.62	1008.91	3068.9	2788.13	1989.29	2603.92	2752.48	2293.67
YDL167C	3725	3149	4255	4781	3884	3905	5065	4846								YDL167C	4077.28	1855.41	5234.99	5193.35	3639.09	5547.66	5535.52	4997.94								YDL167C	2160	2.16	1887.63	858.986	2423.61	2404.33	1684.76	2568.36	2562.74	2313.86
YDL166C	400	523	602	643	413	416	452	432								YDL166C	437.828	308.155	740.65	698.458	386.958	590.993	493.989	445.545								YDL166C	594	0.594	737.085	518.779	1246.88	1175.85	651.444	994.938	831.631	750.075
YDL165W	1216	2059	1802	1813	1157	1055	1430	1372								YDL165W	1331	1213.17	2217.03	1969.37	1084.04	1498.79	1562.84	1415.02								YDL165W	576	0.576	2310.76	2106.21	3849.01	3419.04	1882.02	2602.07	2713.27	2456.63
YDL164C	2388	2002	3112	3238	2174	2153	2901	2592								YDL164C	2613.84	1179.59	3828.74	3517.27	2036.92	3058.67	3170.49	2673.27								YDL164C	2268	2.268	1152.48	520.101	1688.16	1550.83	898.111	1348.62	1397.92	1178.69
YDL163W	0	0	0	0	0	0	1	0								YDL163W	0	0	0	0	0	0	1.0929	0								YDL163W	303	0.303	0	0	0	0	0	0	3.60692	0
YDL162C	12	4	5	6	10	9	14	11								YDL162C	13.1349	2.35682	6.15157	6.51749	9.36944	12.7859	15.3005	11.3449								YDL162C	357	0.357	36.7923	6.60175	17.2313	18.2563	26.2449	35.8149	42.8587	31.7784
YDL161W	1720	2505	4529	5109	1932	1814	2977	2803								YDL161W	1882.66	1475.96	5572.1	5549.64	1810.18	2577.07	3253.55	2890.88								YDL161W	1365	1.365	1379.24	1081.29	4082.12	4065.67	1326.14	1887.96	2383.55	2117.86
YDL160C-A	190	369	174	188	174	170	232	200								YDL160C-A	207.968	217.417	214.075	204.215	163.028	241.512	253.552	206.271								YDL160C-A	243	0.243	855.837	894.72	880.966	840.389	670.898	993.875	1043.42	848.85
YDL160C	7731	9298	23347	25021	7970	7466	13036	11366								YDL160C	8462.13	5478.44	28724.2	27179	7467.44	10606.6	14247	11722.4								YDL160C	1521	1.521	5563.53	3601.86	18885.1	17869.2	4909.56	6973.45	9366.86	7707.01
YDL159W-A	0	0	0	0	1	1	0	3								YDL159W-A	0	0	0	0	0.936944	1.42066	0	3.09406								YDL159W-A	132	0.132	0	0	0	0	7.09806	10.7625	0	23.4398
YDL159W	1904	1398	3023	3157	1668	1668	2430	2075								YDL159W	2084.06	823.71	3719.24	3429.29	1562.82	2369.65	2655.74	2140.06								YDL159W	1548	1.548	1346.29	532.112	2402.61	2215.3	1009.57	1530.78	1715.59	1382.47
YDL159C-B	3	1	2	3	1	3	2	2								YDL159C-B	3.28371	0.589206	2.46063	3.25874	0.936944	4.26197	2.18579	2.06271								YDL159C-B	177	0.177	18.552	3.32885	13.9019	18.411	5.29347	24.0789	12.3491	11.6537
YDL158C	259	431	170	195	215	217	273	220								YDL158C	283.494	253.948	209.154	211.818	201.443	308.282	298.361	226.898								YDL158C	309	0.309	917.456	821.837	676.872	685.496	651.919	997.678	965.568	734.297
YDL157C	1460	2955	1349	1296	1285	1268	1506	1433								YDL157C	1598.07	1741.1	1659.69	1407.78	1203.97	1801.39	1645.9	1477.93								YDL157C	357	0.357	4476.4	4877.04	4649.01	3943.35	3372.47	5045.92	4610.37	4139.86
YDL156W	793	536	964	915	748	741	1190	951								YDL156W	867.995	315.814	1186.02	993.917	700.834	1052.71	1300.55	980.817								YDL156W	1569	1.569	553.215	201.284	755.911	633.472	446.676	670.941	828.901	625.122
YDL155W	2287	1330	3224	3532	2441	2284	3345	2863								YDL155W	2503.28	783.644	3966.54	3836.63	2287.08	3244.78	3655.74	2952.76								YDL155W	1284	1.284	1949.6	610.314	3089.2	2988.03	1781.21	2527.09	2847.15	2299.66
YDL154W	220	316	248	262	204	180	291	292								YDL154W	240.806	186.189	305.118	284.597	191.137	255.718	318.033	301.155								YDL154W	2706	2.706	88.9895	68.806	112.756	105.173	70.6343	94.5004	117.529	111.292
YDL153C	824	1131	1289	1594	1133	1211	1640	1453								YDL153C	901.926	666.392	1585.88	1731.48	1061.56	1720.41	1792.35	1498.56								YDL153C	1833	1.833	492.049	363.552	865.181	944.615	579.136	938.579	977.823	817.543
YDL152W	0	1	0	1	1	1	1	0								YDL152W	0	0.589206	0	1.08625	0.936944	1.42066	1.0929	0								YDL152W	366	0.366	0	1.60985	0	2.96789	2.55996	3.88157	2.98606	0
YDL151C	2	0	0	1	1	2	0	1								YDL151C	2.18914	0	0	1.08625	0.936944	2.84131	0	1.03135								YDL151C	582	0.582	3.76141	0	0	1.86641	1.60987	4.88198	0	1.77208
YDL150W	1917	1255	1845	1933	1982	2129	2380	2241								YDL150W	2098.29	739.453	2269.93	2099.72	1857.02	3024.58	2601.09	2311.26								YDL150W	1269	1.269	1653.5	582.705	1788.76	1654.62	1463.37	2383.43	2049.72	1821.33
YDL149W	546	434	1136	1190	520	487	784	710								YDL149W	597.636	255.715	1397.64	1292.64	487.211	691.86	856.831	732.261								YDL149W	2994	2.994	199.611	85.4093	466.813	431.742	162.729	231.082	286.183	244.576
YDL148C	2029	4451	3366	4234	3016	2950	4250	3901								YDL148C	2220.88	2622.55	4141.24	4599.17	2825.82	4190.94	4644.81	4023.31								YDL148C	2433	2.433	912.817	1077.91	1702.11	1890.33	1161.46	1722.54	1909.09	1653.64
YDL147W	3853	8442	7935	9103	4805	4107	6402	5622								YDL147W	4217.38	4974.07	9762.55	9888.12	4502.01	5834.64	6996.72	5798.27								YDL147W	1338	1.338	3152	3717.54	7296.37	7390.22	3364.73	4360.71	5229.24	4333.53
YDL146W	690	639	870	792	715	620	903	795								YDL146W	755.254	376.502	1070.37	860.308	669.915	880.807	986.885	819.926								YDL146W	1476	1.476	511.69	255.083	725.186	582.865	453.872	596.753	668.621	555.505
YDL145C	28197	24703	32687	34384	33111	31551	42158	39221								YDL145C	30863.6	14555.1	40215.3	37349.6	31023.1	44823.1	46074.3	40450.7								YDL145C	3606	3.606	8558.96	4036.37	11152.3	10357.6	8603.2	12430.2	12777.1	11217.6
YDL144C	3823	5609	3951	4142	3395	3385	4336	4002								YDL144C	4184.54	3304.86	4860.97	4499.24	3180.92	4808.92	4738.8	4127.48								YDL144C	1071	1.071	3907.14	3085.77	4538.72	4200.97	2970.05	4490.12	4424.65	3853.85
YDL143W	7581	7190	8720	8903	8453	7973	9615	8810								YDL143W	8297.94	4236.39	10728.3	9670.87	7919.99	11326.9	10508.2	9086.22								YDL143W	1587	1.587	5228.7	2669.43	6760.14	6093.8	4990.54	7137.3	6621.42	5725.41
YDL142C	844	1478	1697	1665	769	757	1065	1002								YDL142C	923.818	870.846	2087.84	1808.6	720.51	1075.44	1163.93	1033.42								YDL142C	852	0.852	1084.29	1022.12	2450.52	2122.77	845.669	1262.25	1366.12	1212.93
YDL141W	4204	3187	4088	3936	3938	3942	5044	4876								YDL141W	4601.58	1877.8	5029.53	4275.47	3689.68	5600.23	5512.57	5028.88								YDL141W	2073	2.073	2219.77	905.836	2426.21	2062.46	1779.88	2701.51	2659.22	2425.89
YDL140C	37056	23410	44119	47403	39127	42099	56210	50787								YDL140C	40560.4	13793.3	54280.3	51491.4	36659.8	59808.2	61431.7	52379.3								YDL140C	5202	5.202	7797.08	2651.54	10434.5	9898.39	7047.25	11497.2	11809.2	10069.1
YDL139C	286	236	646	632	225	219	357	337								YDL139C	313.047	139.053	794.783	686.509	210.812	311.124	390.164	347.566								YDL139C	672	0.672	465.844	206.923	1182.71	1021.59	313.709	462.982	580.601	517.211
YDL138W	2130	1731	2383	2641	2089	2063	2922	2580								YDL138W	2331.44	1019.92	2931.84	2868.78	1957.28	2930.81	3193.44	2660.89								YDL138W	2292	2.292	1017.21	444.989	1279.16	1251.65	853.96	1278.71	1393.3	1160.95
YDL137W	5359	8162	7459	7343	5232	4800	6768	6270								YDL137W	5865.81	4809.1	9176.92	7976.32	4902.09	6819.15	7396.72	6466.58								YDL137W	546	0.546	10743.2	8807.87	16807.5	14608.6	8978.19	12489.3	13547.1	11843.6
YDL136W	28752	56682	26199	26616	29787	26331	32331	30715								YDL136W	31471.1	33397.4	32233	28911.6	27908.7	37407.3	35334.4	31678								YDL136W	363	0.363	86697.3	92003.7	88796.2	79646.2	76883.6	103050	97340	87267.2
YDL135C	2175	3954	3227	3457	2232	2068	2921	2639								YDL135C	2380.69	2329.72	3970.23	3755.16	2091.26	2937.92	3192.35	2721.74								YDL135C	609	0.609	3909.18	3825.48	6519.26	6166.11	3433.92	4824.17	5241.95	4469.2
YDL134C	4252	5690	6079	6090	4163	3770	5241	4917								YDL134C	4654.12	3352.58	7479.08	6615.25	3900.5	5355.87	5727.87	5071.16								YDL134C	1110	1.11	4192.9	3020.34	6737.91	5959.69	3513.96	4825.11	5160.24	4568.62
YDL133C-A	407	421	305	338	395	322	287	201								YDL133C-A	445.49	248.056	375.246	367.152	370.093	457.451	313.661	207.302								YDL133C-A	78	0.078	5711.41	3180.2	4810.85	4707.08	4744.78	5864.76	4021.3	2657.72
YDL133W	1030	764	1782	1779	1019	943	1444	1357								YDL133W	1127.41	450.153	2192.42	1932.44	954.746	1339.68	1578.14	1399.55								YDL133W	1314	1.314	857.997	342.582	1668.51	1470.65	726.595	1019.54	1201.02	1065.1
YDL132W	5428	6941	10052	10613	6269	5679	9112	7807								YDL132W	5941.33	4089.68	12367.1	11528.4	5873.7	8067.91	9958.47	8051.77								YDL132W	2448	2.448	2427.01	1670.62	5051.93	4709.29	2399.39	3295.71	4068	3289.12
YDL131W	8549	10318	8667	8370	9768	8832	9940	9551								YDL131W	9357.49	6079.42	10663.1	9091.9	9152.07	12547.2	10863.4	9850.45								YDL131W	1323	1.323	7072.93	4595.18	8059.82	6872.18	6917.66	9483.93	8211.18	7445.54
YDL130W-A	289	392	1275	1226	204	151	280	261								YDL130W-A	316.331	230.969	1568.65	1331.74	191.137	214.519	306.011	269.183								YDL130W-A	261	0.261	1212	884.937	6010.16	5102.45	732.324	821.912	1172.46	1031.35
YDL130W	10816	13931	8309	8099	10387	10065	9873	9417								YDL130W	11838.9	8208.23	10222.7	8797.52	9732.03	14298.9	10790.2	9712.25								YDL130W	321	0.321	36881.2	25570.8	31846.4	27406.6	30317.9	44544.9	33614.2	30256.2
YDL129W	524	376	644	639	511	447	599	628								YDL129W	573.555	221.541	792.323	694.113	478.778	635.033	654.645	647.69								YDL129W	876	0.876	654.743	252.901	904.478	792.366	546.55	724.924	747.311	739.372
YDL128W	5890	7461	8484	8566	5703	5310	7384	6531								YDL128W	6447.02	4396.06	10438	9304.8	5343.39	7543.69	8069.95	6735.77								YDL128W	1236	1.236	5216.04	3556.69	8444.98	7528.16	4323.13	6103.31	6529.08	5449.65
YDL127W	1623	1468	2495	2475	1481	1504	2052	1844								YDL127W	1776.49	864.954	3069.64	2688.46	1387.61	2136.67	2242.62	1901.82								YDL127W	927	0.927	1916.38	933.068	3311.37	2900.18	1496.89	2304.93	2419.23	2051.58
YDL126C	28403	29822	36153	37320	31081	27469	36070	32392								YDL126C	31089.1	17571.3	44479.6	40538.8	29121.1	39024	39420.8	33407.6								YDL126C	2508	2.508	12396	7006.1	17735.1	16163.8	11611.3	15559.8	15718	13320.4
YDL125C	3031	5346	4372	3860	2700	2507	3321	3050								YDL125C	3317.64	3149.89	5378.94	4192.92	2529.75	3561.59	3629.51	3145.63								YDL125C	477	0.477	6955.23	6603.55	11276.6	8790.18	5303.45	7466.64	7609.03	6594.61
YDL124W	5874	5032	15801	15815	4910	4238	7718	6622								YDL124W	6429.51	2964.88	19440.2	17179	4600.39	6020.74	8434.97	6829.62								YDL124W	939	0.939	6847.19	3157.49	20703.1	18295	4899.25	6411.87	8982.93	7273.29
YDL123W	613	620	653	589	523	569	661	609								YDL123W	670.972	365.308	803.396	639.8	490.022	808.353	722.404	628.094								YDL123W	423	0.423	1586.22	863.611	1899.28	1512.53	1158.44	1911	1707.81	1484.86
YDL122W	3566	4681	5402	6366	4356	4363	6085	5477								YDL122W	3903.24	2758.07	6646.16	6915.06	4081.33	6198.32	6650.27	5648.72								YDL122W	2430	2.43	1606.27	1135.01	2735.05	2845.7	1679.56	2550.75	2736.74	2324.58
YDL121C	557	862	733	763	680	663	636	567								YDL121C	609.676	507.895	901.821	828.807	637.122	941.895	695.082	584.777								YDL121C	450	0.45	1354.84	1128.66	2004.05	1841.79	1415.83	2093.1	1544.63	1299.5
YDL120W	1727	1964	2434	2325	1604	1431	1956	1855								YDL120W	1890.32	1157.2	2994.59	2525.53	1502.86	2032.96	2137.7	1913.16								YDL120W	525	0.525	3600.62	2204.19	5703.97	4810.53	2862.59	3872.3	4071.82	3644.11
YDL119C	484	661	1678	1868	555	536	865	766								YDL119C	529.772	389.465	2064.47	2029.11	520.004	761.472	945.355	790.017								YDL119C	924	0.924	573.347	421.499	2234.27	2196.01	562.775	824.104	1023.11	854.996
YDL118W	7	3	5	1	1	2	2	2								YDL118W	7.662	1.76762	6.15157	1.08625	0.936944	2.84131	2.18579	2.06271								YDL118W	381	0.381	20.1102	4.63942	16.1459	2.85104	2.45917	7.45751	5.73699	5.41393
YDL117W	3469	3234	8202	9266	4021	4053	6183	5322								YDL117W	3797.07	1905.49	10091	10065.2	3767.45	5757.92	6757.38	5488.86								YDL117W	2658	2.658	1428.54	716.889	3796.48	3786.75	1417.4	2166.26	2542.28	2065.03
YDL116W	2808	4584	5594	5765	3384	2955	4543	4057								YDL116W	3073.56	2700.92	6882.38	6262.22	3170.62	4198.04	4965.03	4184.2								YDL116W	2181	2.181	1409.24	1238.39	3155.61	2871.26	1453.74	1924.82	2276.49	1918.48
YDL115C	290	346	609	606	245	231	371	345								YDL115C	317.426	203.865	749.262	658.266	229.551	328.172	405.464	355.817								YDL115C	1062	1.062	298.894	191.963	705.52	619.836	216.15	309.013	381.793	335.044
YDL114W-A	14	20	7	15	12	22	19	13								YDL114W-A	15.324	11.7841	8.6122	16.2937	11.2433	31.2544	20.765	13.4076								YDL114W-A	114	0.114	134.421	103.369	75.5457	142.927	98.6257	274.162	182.149	117.61
YDL114W	7	2	17	8	10	12	8	11								YDL114W	7.662	1.17841	20.9154	8.68998	9.36944	17.0479	8.74317	11.3449								YDL114W	927	0.927	8.26537	1.27121	22.5624	9.37431	10.1073	18.3904	9.43168	12.2383
YDL113C	736	923	2068	2121	841	740	1268	1070								YDL113C	805.604	543.837	2544.29	2303.93	787.97	1051.29	1385.79	1103.55								YDL113C	1923	1.923	418.931	282.807	1323.08	1198.09	409.761	546.69	720.641	573.868
YDL111C	3911	4446	4520	4844	3853	3641	4261	4007								YDL111C	4280.87	2619.61	5561.02	5261.79	3610.04	5172.61	4656.83	4132.63								YDL111C	798	0.798	5364.49	3282.72	6968.7	6593.72	4523.86	6481.97	5835.63	5178.74
YDL110C	902	605	2252	2394	707	602	1091	888								YDL110C	987.303	356.469	2770.67	2600.48	662.419	855.235	1192.35	915.842								YDL110C	453	0.453	2179.48	786.908	6116.27	5740.57	1462.29	1887.94	2632.12	2021.73
YDL109C	771	403	985	1052	823	887	1261	1051								YDL109C	843.914	237.45	1211.86	1142.73	771.105	1260.12	1378.14	1083.95								YDL109C	1944	1.944	434.112	122.145	623.385	587.826	396.659	648.211	708.921	557.589
YDL108W	971	1501	1239	1300	1002	1013	1234	1141								YDL108W	1062.83	884.398	1524.36	1412.12	938.818	1439.12	1348.63	1176.77								YDL108W	921	0.921	1153.99	960.258	1655.11	1533.25	1019.35	1562.57	1464.31	1277.71
YDL107W	212	347	342	365	190	171	225	200								YDL107W	232.049	204.454	420.768	396.481	178.019	242.932	245.902	206.271								YDL107W	1056	1.056	219.743	193.612	398.454	375.455	168.579	230.049	232.861	195.332
YDL106C	1733	2009	3689	3820	1671	1548	2550	2381								YDL106C	1896.89	1183.71	4538.63	4149.47	1565.63	2199.18	2786.89	2455.65								YDL106C	1680	1.68	1129.1	704.592	2701.57	2469.92	931.924	1309.03	1658.86	1461.7
YDL105W	599	673	984	1062	562	520	745	654								YDL105W	655.648	396.535	1210.63	1153.6	526.562	738.741	814.208	674.505								YDL105W	1209	1.209	542.306	327.986	1001.35	954.173	435.535	611.035	673.455	557.903
YDL104C	267	449	390	388	276	266	402	305								YDL104C	292.25	264.553	479.823	421.464	258.596	377.895	439.344	314.563								YDL104C	1224	1.224	238.767	216.138	392.012	344.334	211.272	308.737	358.941	256.996
YDL103C	3377	3270	4834	4987	3361	3099	4534	4073								YDL103C	3696.37	1926.7	5947.34	5417.12	3149.07	4402.61	4955.19	4200.7								YDL103C	1434	1.434	2577.66	1343.59	4147.38	3777.63	2196	3070.16	3455.5	2929.36
YDL102W	2915	3772	4094	4416	3213	3066	4104	3597								YDL102W	3190.67	2222.48	5036.91	4796.87	3010.4	4355.73	4485.25	3709.78								YDL102W	3294	3.294	968.632	674.707	1529.12	1456.25	913.904	1322.32	1361.64	1126.22
YDL101C	1494	2119	2549	2626	1513	1357	1961	1868								YDL101C	1635.29	1248.53	3136.07	2852.49	1417.6	1927.83	2143.17	1926.57								YDL101C	1542	1.542	1060.5	809.68	2033.77	1849.86	919.323	1250.21	1389.86	1249.4
YDL100C	15155	17982	19838	20244	15537	13779	18942	17308								YDL100C	16588.2	10595.1	24407	21990	14557.3	19575.2	20701.6	17850.7								YDL100C	1065	1.065	15575.8	9948.45	22917.4	20647.9	13668.8	18380.5	19438.2	16761.2
YDL099W	802	837	1386	1645	794	784	1260	1053								YDL099W	877.846	493.165	1705.22	1786.88	743.933	1113.79	1377.05	1086.01								YDL099W	1026	1.026	855.6	480.668	1662	1741.6	725.081	1085.57	1342.15	1058.49
YDL098C	334	688	314	312	290	270	425	367								YDL098C	365.587	405.374	386.319	338.909	271.714	383.577	464.481	378.507								YDL098C	585	0.585	624.935	692.946	660.374	579.332	464.468	655.688	793.984	647.02
YDL097C	9865	9112	13378	13814	9726	8919	12951	11224								YDL097C	10797.9	5368.84	16459.2	15005.4	9112.71	12670.8	14154.1	11575.9								YDL097C	1305	1.305	8274.29	4114.06	12612.4	11498.4	6982.92	9709.45	10846.1	8870.43
YDL096C	4	5	4	1	4	4	3	3								YDL096C	4.37828	2.94603	4.92126	1.08625	3.74777	5.68263	3.27869	3.09406								YDL096C	327	0.327	13.3892	9.00926	15.0497	3.32186	11.4611	17.3781	10.0266	9.46196
YDL095W	24274	23610	24985	25347	24306	23478	32558	30305								YDL095W	26569.6	13911.1	30739.4	27533.1	22773.4	33354.2	35582.5	31255.2								YDL095W	2454	2.454	10827.1	5668.76	12526.3	11219.7	9280.1	13591.8	14499.8	12736.4
YDL094C	16	6	9	14	4	14	12	20								YDL094C	17.5131	3.53523	11.0728	15.2075	3.74777	19.8892	13.1148	20.6271								YDL094C	510	0.51	34.3395	6.93183	21.7114	29.8186	7.34858	38.9984	25.7152	40.4452
YDL093W	1880	2001	2146	2229	2271	2038	2797	2557								YDL093W	2057.79	1179	2640.26	2421.25	2127.8	2895.3	3056.83	2637.17								YDL093W	2232	2.232	921.95	528.226	1182.91	1084.79	953.315	1297.18	1369.55	1181.53
YDL092W	1277	2262	2243	2213	1388	1222	1514	1393								YDL092W	1397.77	1332.78	2759.6	2403.87	1300.48	1736.04	1654.64	1436.67								YDL092W	441	0.441	3169.54	3022.18	6257.59	5450.95	2948.93	3936.6	3752.03	3257.77
YDL091C	1008	1265	1905	1982	958	882	1317	1311								YDL091C	1103.33	745.345	2343.75	2152.94	897.592	1253.02	1439.34	1352.1								YDL091C	1368	1.368	806.526	544.843	1713.27	1573.79	656.135	915.949	1052.15	988.38
YDL090C	1288	1909	1380	1334	1500	1396	1784	1607								YDL090C	1409.81	1124.79	1697.83	1449.05	1405.42	1983.24	1949.73	1657.38								YDL090C	1296	1.296	1087.81	867.896	1310.06	1118.1	1084.43	1530.27	1504.42	1278.85
YDL089W	935	1601	1234	1154	1013	953	1356	1316								YDL089W	1023.42	943.318	1518.21	1253.53	949.124	1353.89	1481.97	1357.26								YDL089W	1455	1.455	703.384	648.329	1043.44	861.533	652.319	930.505	1018.53	932.825
YDL088C	3728	4590	6036	6120	3713	3586	5190	4870								YDL088C	4080.56	2704.45	7426.18	6647.84	3478.87	5094.47	5672.13	5022.69								YDL088C	1587	1.587	2571.24	1704.13	4679.38	4188.93	2192.11	3210.13	3574.12	3164.9
YDL087C	359	276	448	481	327	332	459	377								YDL087C	392.951	162.621	551.181	522.485	306.381	471.658	501.639	388.82								YDL087C	786	0.786	499.938	206.897	701.248	664.74	389.797	600.074	638.218	494.682
YDL086W	6592	7701	9104	8976	5953	5456	7406	7153								YDL086W	7215.41	4537.47	11200.8	9750.16	5577.63	7751.1	8093.99	7377.27								YDL086W	822	0.822	8777.87	5520.04	13626.3	11861.5	6785.43	9429.56	9846.7	8974.78
YDL086C-A	69	86	32	41	63	77	55	58								YDL086C-A	75.5254	50.6717	39.3701	44.5362	59.0275	109.391	60.1093	59.8185								YDL086C-A	435	0.435	173.622	116.487	90.5059	102.382	135.695	251.473	138.182	137.514
YDL085C-A	386	550	271	236	299	246	264	269								YDL085C-A	422.504	324.063	333.415	256.355	280.146	349.481	288.525	277.434								YDL085C-A	207	0.207	2041.08	1565.52	1610.7	1238.43	1353.36	1688.32	1393.84	1340.26
YDL085W	36	35	303	367	22	27	55	39								YDL085W	39.4046	20.6222	372.785	398.653	20.6128	38.3577	60.1093	40.2228								YDL085W	1638	1.638	24.0565	12.5899	227.586	243.378	12.5841	23.4174	36.6968	24.556
YDL084W	25600	38290	22819	22922	27630	24832	32090	29613								YDL084W	28021	22560.7	28074.6	24899	25887.8	35277.7	35071	30541.5								YDL084W	1341	1.341	20895.6	16823.8	20935.5	18567.5	19304.8	26307	26152.9	22775.1
YDL083C	28612	48202	23655	22822	31064	27965	30883	27615								YDL083C	31317.9	28400.9	29103.1	24790.4	29105.2	39728.7	33751.9	28480.8								YDL083C	432	0.432	72495.1	65742.8	67368.3	57385.1	67373.2	91964.5	78129.4	65927.8
YDL082W	36425	53595	30649	30382	38323	35630	44585	43093								YDL082W	39869.7	31578.5	37707.9	33002.4	35906.5	50618	48726.8	44444.1								YDL082W	600	0.6	66449.6	52630.8	62846.5	55004	59844.2	84363.3	81211.3	74073.5
YDL081C	40415	64133	31269	33248	41684	38148	40454	36387								YDL081C	44237.1	37787.5	38470.7	36115.6	39055.6	54195.2	44212	37527.8								YDL081C	321	0.321	137810	117718	119846	112510	121668	168832	137732	116909
YDL080C	1731	1240	2247	2349	1803	1708	2142	2090								YDL080C	1894.7	730.615	2764.52	2551.6	1689.31	2426.48	2340.98	2155.53								YDL080C	1830	1.83	1035.36	399.243	1510.67	1394.32	923.12	1325.95	1279.23	1177.88
YDL079C	156	214	614	528	170	191	242	210								YDL079C	170.753	126.09	755.413	573.539	159.28	271.345	264.481	216.584								YDL079C	1506	1.506	113.382	83.7251	501.603	380.836	105.764	180.176	175.618	143.814
YDL078C	4262	6540	5649	5906	4133	3706	4661	4206								YDL078C	4665.06	3853.41	6950.05	6415.38	3872.39	5264.95	5093.99	4337.87								YDL078C	1032	1.032	4520.41	3733.92	6734.54	6216.45	3752.31	5101.7	4936.04	4203.36
YDL077C	1676	1778	3026	3256	1826	1758	2888	2550								YDL077C	1834.5	1047.61	3722.93	3536.82	1710.86	2497.51	3156.28	2629.95								YDL077C	3150	3.15	582.381	332.574	1181.88	1122.8	543.13	792.862	1001.99	834.905
YDL076C	1005	1348	1614	1595	1135	1104	1541	1341								YDL076C	1100.04	794.249	1985.73	1732.57	1063.43	1568.4	1684.15	1383.04								YDL076C	885	0.885	1242.99	897.457	2243.76	1957.7	1201.62	1772.21	1903	1562.76
YDL075W	12576	21572	11579	10945	13037	11728	13158	12829								YDL075W	13765.3	12710.3	14245.8	11889	12214.9	16661.5	14380.3	13231.2								YDL075W	342	0.342	40249.5	37164.8	41654.4	34763.1	35716.2	48717.7	42047.7	38687.8
YDL074C	2476	4296	4691	5241	3156	2953	4516	3958								YDL074C	2710.16	2531.23	5771.41	5693.03	2956.99	4195.2	4935.52	4082.1								YDL074C	2103	2.103	1288.71	1203.63	2744.37	2707.1	1406.08	1994.86	2346.89	1941.08
YDL073W	1492	2418	2263	2564	1731	1704	2709	2473								YDL073W	1633.1	1424.7	2784.2	2785.14	1621.85	2420.8	2960.66	2550.54								YDL073W	2955	2.955	552.656	482.132	942.201	942.518	548.849	819.221	1001.91	863.126
YDL072C	2569	4118	7322	7283	2398	2147	2863	2556								YDL072C	2811.95	2426.35	9008.37	7911.14	2246.79	3050.15	3128.96	2636.14								YDL072C	612	0.612	4594.69	3964.62	14719.6	12926.7	3671.23	4983.9	5112.68	4307.42
YDL071C	53	96	72	64	64	49	60	60								YDL071C	58.0123	56.5638	88.5827	69.5199	59.9644	69.6122	65.5738	61.8812								YDL071C	375	0.375	154.699	150.837	236.22	185.386	159.905	185.632	174.863	165.017
YDL070W	4357	3394	5077	5656	3908	3567	5784	4758								YDL070W	4769.05	1999.76	6246.31	6143.82	3661.58	5067.48	6321.31	4907.18								YDL070W	1917	1.917	2487.77	1043.17	3258.38	3204.91	1910.06	2643.44	3297.5	2559.82
YDL069C	258	612	355	392	317	232	438	314								YDL069C	282.399	360.594	436.762	425.809	297.011	329.592	478.689	323.845								YDL069C	690	0.69	409.274	522.6	632.988	617.115	430.451	477.67	693.751	469.34
YDL068W	16	13	6	11	8	10	17	2								YDL068W	17.5131	7.65967	7.38189	11.9487	7.49555	14.2066	18.5792	2.06271								YDL068W	330	0.33	53.0701	23.2111	22.3694	36.2083	22.7138	43.0502	56.3007	6.25063
YDL067C	1436	2432	2636	2323	1214	1137	1556	1288								YDL067C	1571.8	1432.95	3243.11	2523.35	1137.45	1615.29	1700.55	1328.38								YDL067C	180	0.18	8732.24	7960.82	18017.3	14018.6	6319.16	8973.81	9447.48	7379.9
YDL066W	20837	25586	18511	18469	24263	22717	26915	24725								YDL066W	22807.6	15075.4	22774.4	20061.9	22733.1	32273.1	29415.3	25500.2								YDL066W	1287	1.287	17721.5	11713.6	17695.7	15588.1	17663.6	25076.2	22855.7	19813.7
YDL065C	327	524	669	799	409	387	608	439								YDL065C	357.925	308.744	823.081	867.912	383.21	549.794	664.481	452.764								YDL065C	1029	1.029	347.837	300.043	799.884	843.452	372.41	534.299	645.754	440.004
YDL064W	1214	1094	1357	1364	1036	966	1270	1213								YDL064W	1328.81	644.591	1669.54	1481.64	970.674	1372.35	1387.98	1251.03								YDL064W	474	0.474	2803.39	1359.9	3522.23	3125.83	2047.83	2895.26	2928.22	2639.31
YDL063C	2943	3803	3505	3905	3497	3559	4176	4105								YDL063C	3221.32	2240.75	4312.25	4241.8	3276.49	5056.12	4563.93	4233.7								YDL063C	1863	1.863	1729.1	1202.76	2314.68	2276.86	1758.72	2713.96	2449.78	2272.52
YDL062W	5	5	2	5	2	2	3	4								YDL062W	5.47285	2.94603	2.46063	5.43124	1.87389	2.84131	3.27869	4.12541								YDL062W	426	0.426	12.8471	6.91556	5.77613	12.7494	4.3988	6.66975	7.69645	9.68407
YDL061C	12959	25380	12018	11253	13119	11964	14300	13336								YDL061C	14184.5	14954	14785.9	12223.5	12291.8	16996.7	15628.4	13754.1								YDL061C	171	0.171	82950.6	87450.5	86467.4	71482.7	71881.7	99396.1	91394.2	80433.5
YDL060W	4616	4422	5465	6088	5875	5953	6960	6619								YDL060W	5052.54	2605.47	6723.67	6613.08	5504.54	8457.17	7606.56	6826.53								YDL060W	2367	2.367	2134.58	1100.75	2840.59	2793.86	2325.54	3572.95	3213.59	2884.04
YDL059C	214	228	444	436	252	218	359	321								YDL059C	234.238	134.339	546.26	473.604	236.11	309.703	392.35	331.064								YDL059C	717	0.717	326.692	187.362	761.869	660.536	329.302	431.943	547.21	461.736
YDL058W	2192	2786	2913	3706	2835	2576	3927	3206								YDL058W	2399.3	1641.53	3583.91	4025.64	2656.24	3659.61	4291.8	3306.52								YDL058W	5373	5.373	446.547	305.514	667.022	749.234	494.367	681.111	798.772	615.395
YDL057W	297	435	703	708	328	329	427	387								YDL057W	325.088	256.305	864.911	769.064	307.318	467.396	466.667	399.134								YDL057W	987	0.987	329.369	259.68	876.303	779.193	311.365	473.552	472.813	404.391
YDL056W	1493	1148	3295	3569	1566	1558	2391	2160								YDL056W	1634.19	676.408	4053.89	3876.82	1467.25	2213.38	2613.11	2227.72								YDL056W	2502	2.502	653.155	270.347	1620.26	1549.49	586.432	884.645	1044.41	890.377
YDL055C	58653	84622	79564	79772	64781	56960	78570	72873								YDL055C	64199.9	49859.8	97888.8	86652.2	60696.1	80920.6	85868.9	75157.8								YDL055C	1086	1.086	59115.9	45911.4	90137	79790.2	55889.6	74512.5	79068.9	69206.1
YDL054C	1661	2386	1937	1971	1560	1487	1890	1604								YDL054C	1818.08	1405.84	2383.12	2141	1461.63	2112.52	2065.57	1654.29								YDL054C	1461	1.461	1244.41	962.248	1631.16	1465.43	1000.43	1445.94	1413.81	1132.3
YDL053C	2346	2721	3370	3398	2542	2134	2992	2854								YDL053C	2567.86	1603.23	4146.16	3691.07	2381.71	3031.68	3269.95	2943.48								YDL053C	558	0.558	4601.91	2873.17	7430.4	6614.82	4268.3	5433.12	5860.12	5275.06
YDL052C	4804	5080	5027	4808	4562	4533	5866	5290								YDL052C	5258.32	2993.17	6184.79	5222.68	4274.34	6439.84	6410.93	5455.86								YDL052C	912	0.912	5765.7	3281.98	6781.57	5726.62	4686.77	7061.22	7029.53	5982.3
YDL051W	5483	10400	5228	5126	6456	6210	7102	6943								YDL051W	6001.53	6127.74	6432.09	5568.11	6048.91	8822.28	7761.75	7160.68								YDL051W	828	0.828	7248.23	7400.65	7768.22	6724.77	7305.45	10654.9	9374.09	8648.17
YDL050C	1	1	3	0	0	0	2	0								YDL050C	1.09457	0.589206	3.69094	0	0	0	2.18579	0								YDL050C	372	0.372	2.94239	1.58389	9.92189	0	0	0	5.87579	0
YDL049C	174	272	367	382	181	159	201	200								YDL049C	190.455	160.264	451.526	414.947	169.587	225.884	219.672	206.271								YDL049C	807	0.807	236.004	198.592	559.511	514.184	210.145	279.906	272.208	255.602
YDL048C	893	776	1889	1882	926	850	1071	958								YDL048C	977.452	457.224	2324.06	2044.32	867.61	1207.56	1170.49	988.036								YDL048C	1473	1.473	663.579	310.403	1577.78	1387.86	589.009	819.795	794.631	670.765
YDL047W	4596	4558	5372	5789	4336	4288	5758	5309								YDL047W	5030.65	2685.6	6609.25	6288.29	4062.59	6091.77	6292.9	5475.45								YDL047W	936	0.936	5374.62	2869.23	7061.17	6718.26	4340.37	6508.31	6723.18	5849.84
YDL046W	7853	13383	12087	12493	7975	7904	9576	8333								YDL046W	8595.67	7885.34	14870.8	13570.5	7472.13	11228.9	10465.6	8594.27								YDL046W	522	0.522	16466.8	15106	28488.2	25997.1	14314.4	21511.2	20049	16464.1
YDL045W-A	850	1156	1105	1017	723	714	880	755								YDL045W-A	930.385	681.122	1359.5	1104.71	677.41	1014.35	961.749	778.672								YDL045W-A	288	0.288	3230.5	2365.01	4720.48	3835.81	2352.12	3522.04	3339.4	2703.72
YDL045C	1172	1889	2082	2224	1195	1111	1482	1326								YDL045C	1282.84	1113.01	2561.52	2415.82	1119.65	1578.35	1619.67	1367.57								YDL045C	921	0.921	1392.87	1208.48	2781.23	2623.04	1215.69	1713.73	1758.6	1484.88
YDL044C	407	741	997	1061	392	409	682	625								YDL044C	445.49	436.601	1226.62	1152.51	367.282	581.048	745.355	644.596								YDL044C	1323	1.323	336.727	330.009	927.153	871.133	277.613	439.19	563.383	487.223
YDL043C	446	698	793	880	428	422	611	514								YDL043C	488.179	411.266	975.64	955.898	401.012	599.517	667.76	530.116								YDL043C	801	0.801	609.461	513.44	1218.03	1193.38	500.639	748.461	833.657	661.817
YDL042C	2958	2153	3017	3007	2897	3058	3785	3386								YDL042C	3237.74	1268.56	3711.86	3266.35	2714.33	4344.37	4136.61	3492.16								YDL042C	1689	1.689	1916.96	751.072	2197.67	1933.89	1607.06	2572.15	2449.15	2067.59
YDL041W	6	1	15	8	5	2	7	6								YDL041W	6.56743	0.589206	18.4547	8.68998	4.68472	2.84131	7.65027	6.18812								YDL041W	354	0.354	18.552	1.66442	52.132	24.548	13.2337	8.02631	21.6109	17.4806
YDL040C	9462	7994	10767	11500	10405	9396	13851	12776								YDL040C	10356.8	4710.11	13246.8	12491.9	9748.9	13348.5	15137.7	13176.6								YDL040C	2565	2.565	4037.75	1836.3	5164.44	4870.12	3800.74	5204.09	5901.64	5137.06
YDL039C	569	468	1008	1153	912	970	464	493								YDL039C	622.811	275.748	1240.16	1252.44	854.493	1378.04	507.104	508.457								YDL039C	2097	2.097	297.001	131.497	591.396	597.255	407.483	657.147	241.823	242.469
YDL037C	159	116	42	56	363	393	110	156								YDL037C	174.037	68.3479	51.6732	60.8299	340.111	558.318	120.219	160.891								YDL037C	987	0.987	176.329	69.2481	52.3538	61.6311	344.59	565.672	121.802	163.01
YDL036C	1363	1718	1476	1505	1450	1396	1787	1702								YDL036C	1491.9	1012.26	1815.94	1634.8	1358.57	1983.24	1953.01	1755.36								YDL036C	1389	1.389	1074.08	728.766	1307.38	1176.96	978.091	1427.82	1406.05	1263.76
YDL035C	1351	1652	2692	3354	1714	1650	2491	2143								YDL035C	1478.77	973.368	3312.01	3643.28	1605.92	2344.08	2722.4	2210.19								YDL035C	2886	2.886	512.393	337.272	1147.61	1262.4	556.452	812.226	943.314	765.832
YDL034W	2	0	2	3	1	1	5	5								YDL034W	2.18914	0	2.46063	3.25874	0.936944	1.42066	5.46448	5.15677								YDL034W	345	0.345	6.34534	0	7.13226	9.44564	2.71578	4.11784	15.8391	14.9471
YDL032W	5	2	19	14	6	2	9	5								YDL032W	5.47285	1.17841	23.376	15.2075	5.62166	2.84131	9.83607	5.15677								YDL032W	312	0.312	17.5412	3.77696	74.923	48.7419	18.0181	9.10677	31.5259	16.5281
YDL031W	3805	3332	5079	6093	4916	5019	6522	6072								YDL031W	4164.84	1963.23	6248.77	6618.51	4606.02	7130.27	7127.87	6262.38								YDL031W	2988	2.988	1393.86	657.039	2091.29	2215.03	1541.5	2386.3	2385.5	2095.84
YDL030W	545	441	727	760	583	561	748	677								YDL030W	596.541	259.84	894.439	825.549	546.238	796.988	817.486	698.226								YDL030W	1593	1.593	374.477	163.113	561.481	518.235	342.899	500.306	513.174	438.309
YDL029W	5808	5866	10569	10356	5951	5434	7363	6597								YDL029W	6357.27	3456.28	13003.2	11249.2	5575.75	7719.85	8046.99	6803.84								YDL029W	1176	1.176	5405.84	2939.01	11057.1	9565.63	4741.29	6564.5	6842.68	5785.58
YDL028C	1528	1233	3367	3575	1497	1528	2276	2006								YDL028C	1672.5	726.491	4142.47	3883.34	1402.6	2170.76	2487.43	2068.89								YDL028C	2295	2.295	728.76	316.554	1805	1692.09	611.157	945.866	1083.85	901.479
YDL027C	1564	2565	3289	3270	1450	1332	2254	1945								YDL027C	1711.91	1511.31	4046.51	3552.03	1358.57	1892.31	2463.39	2005.98								YDL027C	1263	1.263	1355.43	1196.61	3203.88	2812.38	1075.67	1498.27	1950.43	1588.27
YDL026W	10	2	5	4	7	0	3	6								YDL026W	10.9457	1.17841	6.15157	4.34499	6.55861	0	3.27869	6.18812								YDL026W	312	0.312	35.0824	3.77696	19.7166	13.9263	21.0212	0	10.5086	19.8337
YDL025C	1577	1068	3464	3619	1521	1479	2431	2082								YDL025C	1726.14	629.272	4261.81	3931.13	1425.09	2101.15	2656.83	2147.28								YDL025C	1863	1.863	926.537	337.773	2287.61	2110.11	764.944	1127.83	1426.1	1152.59
YDL025W-A	12	12	2	7	7	11	17	8								YDL025W-A	13.1349	7.07047	2.46063	7.60374	6.55861	15.6272	18.5792	8.25083								YDL025W-A	105	0.105	125.094	67.3378	23.4346	72.4165	62.4629	148.831	176.945	78.5793
YDL024C	51	50	207	213	67	71	93	83								YDL024C	55.8231	29.4603	254.675	231.371	62.7752	100.867	101.639	85.6023								YDL024C	1407	1.407	39.6753	20.9384	181.006	164.443	44.6164	71.6891	72.2383	60.8403
YDL022C-A	0	0	0	0	0	0	0	0								YDL022C-A	0	0	0	0	0	0	0	0								YDL022C-A	249	0.249	0	0	0	0	0	0	0	0
YDL023C	2	3	2	4	10	5	3	5								YDL023C	2.18914	1.76762	2.46063	4.34499	9.36944	7.10328	3.27869	5.15677								YDL023C	321	0.321	6.81976	5.5066	7.66551	13.5358	29.1883	22.1286	10.214	16.0647
YDL022W	6826	5797	12244	11565	3954	2920	5929	4692								YDL022W	7471.54	3415.63	15064	12562.5	3704.68	4148.32	6479.78	4839.11								YDL022W	1176	1.176	6353.35	2904.44	12809.5	10682.4	3150.23	3527.48	5510.02	4114.89
YDL021W	53	77	394	449	31	24	46	59								YDL021W	58.0123	45.3688	484.744	487.725	29.0453	34.0958	50.2732	60.8498								YDL021W	936	0.936	61.9789	48.471	517.889	521.074	31.0313	36.4271	53.7107	65.0105
YDL020C	3374	3064	6983	6918	3428	3076	5309	4512								YDL020C	3693.08	1805.33	8591.29	7514.66	3211.84	4369.94	5802.19	4653.47								YDL020C	1596	1.596	2313.96	1131.16	5383.01	4708.44	2012.43	2738.06	3635.45	2915.71
YDL019C	5052	3343	6623	6720	5316	5084	7533	6354								YDL019C	5529.77	1969.71	8148.38	7299.59	4980.79	7222.62	8232.79	6553.22								YDL019C	3852	3.852	1435.56	511.349	2115.36	1895.01	1293.04	1875.03	2137.28	1701.25
YDL018C	1000	2067	1811	1751	1012	867	1189	1091								YDL018C	1094.57	1217.89	2228.1	1902.02	948.187	1231.71	1299.45	1125.21								YDL018C	678	0.678	1614.41	1796.3	3286.28	2805.34	1398.51	1816.68	1916.6	1659.6
YDL017W	618	483	1206	1250	661	617	874	798								YDL017W	676.445	284.586	1483.76	1357.81	619.32	876.545	955.191	823.02								YDL017W	1524	1.524	443.861	186.736	973.596	890.952	406.378	575.161	626.766	540.039
YDL016C	616	1406	777	759	675	597	820	840								YDL016C	674.256	828.423	955.955	824.462	632.437	848.132	896.175	866.337								YDL016C	303	0.303	2225.27	2734.07	3154.97	2721	2087.25	2799.11	2957.67	2859.2
YDL015C	9626	19186	12151	12510	10199	9344	12161	11662								YDL015C	10536.3	11304.5	14949.6	13589	9555.89	13274.6	13290.7	12027.6								YDL015C	933	0.933	11293	12116.3	16023.1	14564.8	10242.1	14227.9	14245.1	12891.4
YDL014W	20477	20738	21016	22205	21206	22044	26034	25147								YDL014W	22413.5	12218.9	25856.3	24120.1	19868.8	31316.9	28452.5	25935.4								YDL014W	984	0.984	22778	12417.6	26276.7	24512.3	20191.9	31826.2	28915.1	26357.2
YDL013W	1418	815	2115	2339	1235	1358	1981	1574								YDL013W	1552.1	480.203	2602.12	2540.73	1157.13	1929.25	2165.03	1623.35								YDL013W	1860	1.86	834.463	258.173	1398.99	1365.99	622.11	1037.23	1163.99	872.769
YDL012C	3388	2877	4393	4538	3183	2915	4147	3465								YDL012C	3708.41	1695.14	5404.77	4929.39	2982.29	4141.21	4532.24	3573.64								YDL012C	324	0.324	11445.7	5231.93	16681.4	15214.2	9204.6	12781.5	13988.4	11029.7
YDL011C	2	1	1	0	2	1	0	0								YDL011C	2.18914	0.589206	1.23031	0	1.87389	1.42066	0	0								YDL011C	324	0.324	6.75661	1.81854	3.79727	0	5.7836	4.38474	0	0
YDL010W	777	1179	1198	1166	853	779	1052	922								YDL010W	850.482	694.674	1473.92	1266.57	799.213	1106.69	1149.73	950.908								YDL010W	696	0.696	1221.96	998.094	2117.7	1819.78	1148.29	1590.07	1651.91	1366.25
YDL009C	7	7	4	2	5	5	5	3								YDL009C	7.662	4.12444	4.92126	2.1725	4.68472	7.10328	5.46448	3.09406								YDL009C	324	0.324	23.6481	12.7298	15.1891	6.70524	14.459	21.9237	16.8657	9.54957
YDL008W	834	1636	1118	1107	881	776	1041	967								YDL008W	912.872	963.941	1375.49	1202.48	825.447	1102.43	1137.7	997.318								YDL008W	498	0.498	1833.08	1935.62	2762.03	2414.61	1657.52	2213.71	2284.55	2002.65
YDL007C-A	0	0	1	2	0	2	0	0								YDL007C-A	0	0	1.23031	2.1725	0	2.84131	0	0								YDL007C-A	258	0.258	0	0	4.76866	8.42053	0	11.0128	0	0
YDL007W	3685	5636	5909	6782	4684	4052	5650	4892								YDL007W	4033.49	3320.76	7269.93	7366.93	4388.64	5756.5	6174.86	5045.38								YDL007W	1314	1.314	3069.63	2527.22	5532.67	5606.5	3339.91	4380.9	4699.29	3839.71
YDL006W	687	1168	1360	1333	708	651	932	907								YDL006W	751.97	688.192	1673.23	1447.97	663.356	924.847	1018.58	935.437								YDL006W	846	0.846	888.854	813.466	1977.81	1711.55	784.109	1093.2	1203.99	1105.72
YDL005C	1627	1336	3446	3806	1749	1721	2683	2385								YDL005C	1780.87	787.179	4239.67	4134.26	1638.71	2444.95	2932.24	2459.78								YDL005C	1296	1.296	1374.13	607.391	3271.35	3190.02	1264.44	1886.54	2262.53	1897.98
YDL004W	4290	7246	6388	6014	3296	3338	4567	3943								YDL004W	4695.71	4269.38	7859.25	6532.7	3088.17	4742.15	4991.26	4066.63								YDL004W	483	0.483	9721.97	8839.31	16271.7	13525.3	6393.72	9818.12	10333.9	8419.51
YDL003W	2505	4526	5488	6088	2915	2665	4717	4004								YDL003W	2741.9	2666.75	6751.97	6613.08	2731.19	3786.05	5155.19	4129.54								YDL003W	1701	1.701	1611.93	1567.75	3969.41	3887.76	1605.64	2225.78	3030.68	2427.71
YDL002C	448	971	749	725	494	395	541	555								YDL002C	490.368	572.119	921.506	787.53	462.85	561.159	591.257	572.401								YDL002C	612	0.612	801.255	934.835	1505.73	1286.81	756.291	916.927	966.106	935.296
YDL001W	684	1049	1100	1259	681	642	899	747								YDL001W	748.687	618.077	1353.35	1367.59	638.059	912.061	982.514	770.421								YDL001W	1293	1.293	579.031	478.018	1046.67	1057.68	493.472	705.384	759.871	595.84
YDR001C	3725	2205	15720	16241	3777	3245	5258	4504								YDR001C	4077.28	1299.2	19340.6	17641.8	3538.84	4610.03	5746.45	4645.21								YDR001C	2256	2.256	1807.3	575.886	8572.94	7819.93	1568.63	2043.45	2547.18	2059.05
YDR002W	8422	16944	11105	11105	9769	8110	9976	9444								YDR002W	9218.48	9983.5	13662.6	12062.8	9153	11521.5	10902.7	9740.1								YDR002W	606	0.606	15212	16474.4	22545.6	19905.6	15104	19012.4	17991.3	16072.8
YDR003W	455	383	770	812	403	392	448	437								YDR003W	498.03	225.666	947.343	882.033	377.588	556.897	489.617	450.701								YDR003W	633	0.633	786.777	356.502	1496.59	1393.42	596.506	879.775	773.487	712.008
YDR003W-A	393	372	622	621	304	306	500	393								YDR003W-A	430.166	219.185	765.256	674.56	284.831	434.721	546.448	405.322								YDR003W-A	123	0.123	3497.29	1781.99	6221.59	5484.23	2315.7	3534.32	4442.67	3295.3
YDR004W	768	1014	900	905	844	859	1094	1000								YDR004W	840.63	597.455	1107.28	983.055	790.78	1220.34	1195.63	1031.35								YDR004W	1383	1.383	607.831	431.999	800.639	710.813	571.786	882.389	864.518	745.736
YDR005C	1461	2963	2455	2454	1597	1468	2088	1973								YDR005C	1599.17	1745.82	3020.42	2665.65	1496.3	2085.52	2281.97	2034.86								YDR005C	1188	1.188	1346.1	1469.54	2542.44	2243.82	1259.51	1755.49	1920.85	1712.84
YDR006C	5292	4485	8781	9851	5006	5179	7331	6651								YDR006C	5792.47	2642.59	10803.4	10700.6	4690.34	7357.58	8012.02	6859.53								YDR006C	2706	2.706	2140.6	976.566	3992.39	3954.41	1733.31	2718.99	2960.84	2534.93
YDR007W	172	164	302	303	170	200	243	211								YDR007W	188.266	96.6297	371.555	329.133	159.28	284.131	265.574	217.616								YDR007W	675	0.675	278.913	143.155	550.452	487.605	235.971	420.935	393.443	322.393
YDR008C	39	24	32	34	21	30	29	25								YDR008C	42.6883	14.1409	39.3701	36.9324	19.6758	42.6197	31.694	25.7838								YDR008C	351	0.351	121.619	40.2876	112.165	105.221	56.0565	121.424	90.2963	73.4582
YDR009W	147	144	412	464	183	194	227	241								YDR009W	160.902	84.8456	506.89	504.019	171.461	275.607	248.087	248.556								YDR009W	1563	1.563	102.944	54.2838	324.306	322.469	109.7	176.332	158.725	159.025
YDR010C	2	2	4	3	2	0	0	1								YDR010C	2.18914	1.17841	4.92126	3.25874	1.87389	0	0	1.03135								YDR010C	333	0.333	6.574	3.53877	14.7786	9.78602	5.62729	0	0	3.09716
YDR011W	14182	10914	22023	23331	16408	14639	24628	21252								YDR011W	15523.2	6430.59	27095.2	25343.3	15373.4	20797	26915.8	21918.3								YDR011W	4506	4.506	3445.01	1427.12	6013.14	5624.34	3411.76	4615.4	5973.33	4864.25
YDR012W	92234	123956	86778	86697	93305	84728	103134	98308								YDR012W	100957	73035.6	106764	94174.5	87421.5	120369	112715	101390								YDR012W	1089	1.089	92705.8	67066.7	98038.8	86477.9	80276.9	110532	103503	93104
YDR013W	516	884	654	585	488	455	571	513								YDR013W	564.799	520.858	804.626	635.455	457.229	646.399	624.044	529.084								YDR013W	627	0.627	900.795	830.714	1283.3	1013.49	729.232	1030.94	995.285	843.834
YDR014W	326	684	693	763	403	361	560	452								YDR014W	356.83	403.017	852.608	828.807	377.588	512.857	612.022	466.172								YDR014W	1944	1.944	183.555	207.313	438.584	426.341	194.233	263.815	314.826	239.8
YDR014W-A	23	48	75	68	30	29	40	41								YDR014W-A	25.1751	28.2819	92.2736	73.8649	28.1083	41.199	43.7158	42.2855								YDR014W-A	489	0.489	51.4829	57.8361	188.699	151.053	57.4812	84.2516	89.3985	86.4734
YDR015C	0	3	0	0	0	0	0	0								YDR015C	0	1.76762	0	0	0	0	0	0								YDR015C	240	0.24	0	7.36507	0	0	0	0	0	0
YDR016C	913	1736	917	867	721	684	1010	910								YDR016C	999.343	1022.86	1128.2	941.777	675.536	971.729	1103.83	938.531								YDR016C	285	0.285	3506.47	3588.99	3958.59	3304.48	2370.3	3409.58	3873.07	3293.09
YDR017C	3278	2210	5447	5888	3723	3533	5119	4685								YDR017C	3588	1302.14	6701.53	6395.83	3488.24	5019.18	5594.54	4831.89								YDR017C	3153	3.153	1137.96	412.986	2125.44	2028.49	1106.32	1591.87	1774.35	1532.47
YDR018C	31	29	335	334	48	49	78	45								YDR018C	33.9317	17.087	412.156	362.807	44.9733	69.6122	85.2459	46.4109								YDR018C	1191	1.191	28.4901	14.3467	346.058	304.624	37.761	58.4485	71.5751	38.968
YDR019C	1192	1260	4950	5108	1579	1385	2466	2224								YDR019C	1304.73	742.399	6090.06	5548.56	1479.43	1967.61	2695.08	2293.73								YDR019C	1203	1.203	1084.56	617.123	5062.39	4612.27	1229.79	1635.59	2240.3	1906.67
YDR020C	880	1372	1010	1194	907	932	1233	1089								YDR020C	963.222	808.39	1242.62	1296.98	849.808	1324.05	1347.54	1123.14								YDR020C	699	0.699	1378	1156.5	1777.71	1855.48	1215.75	1894.21	1927.81	1606.79
YDR021W	626	808	847	1044	618	640	787	773								YDR021W	685.201	476.078	1042.08	1134.04	579.031	909.22	860.109	797.236								YDR021W	1200	1.2	571.001	396.732	868.397	945.036	482.526	757.683	716.758	664.363
YDR022C	271	468	296	281	230	260	372	312								YDR022C	296.629	275.748	364.173	305.236	215.497	369.371	406.557	321.782								YDR022C	591	0.591	501.91	466.579	616.198	516.473	364.631	624.993	687.914	544.471
YDR023W	13081	22175	18249	18428	15917	14690	18762	17428								YDR023W	14318.1	13065.6	22452	20017.4	14913.3	20869.4	20504.9	17974.4								YDR023W	1389	1.389	10308.2	9406.51	16164.2	14411.4	10736.7	15024.8	14762.4	12940.5
YDR024W	117	191	128	138	140	123	172	162								YDR024W	128.065	112.538	157.48	149.902	131.172	174.741	187.978	167.079								YDR024W	486	0.486	263.508	231.56	324.034	308.441	269.901	359.549	386.786	343.784
YDR025W	36265	36408	35832	34838	35784	34542	39975	38270								YDR025W	39694.6	21451.8	44084.6	37842.7	33527.6	49072.3	43688.5	39469.9								YDR025W	471	0.471	84277.3	45545.2	93598	80345.5	71183.8	104187	92757	83800.2
YDR026C	865	642	1318	1403	868	922	1341	1144								YDR026C	946.804	378.27	1621.56	1524.01	813.267	1309.85	1465.57	1179.87								YDR026C	1713	1.713	552.717	220.823	946.617	889.671	474.762	764.65	855.56	688.773
YDR027C	1700	2039	2709	2694	1908	1615	2588	2276								YDR027C	1860.77	1201.39	3332.92	2926.35	1787.69	2294.36	2828.42	2347.36								YDR027C	2670	2.67	696.918	449.959	1248.29	1096.01	669.546	859.311	1059.33	879.161
YDR028C	4364	3244	11531	13914	5010	5002	8745	7146								YDR028C	4776.71	1911.38	14186.8	15114.1	4694.09	7106.12	9557.38	7370.05								YDR028C	3045	3.045	1568.71	627.712	4659.04	4963.57	1541.57	2333.7	3138.71	2420.38
YDR029W	1	0	3	0	0	0	0	0								YDR029W	1.09457	0	3.69094	0	0	0	0	0								YDR029W	315	0.315	3.47483	0	11.7173	0	0	0	0	0
YDR030C	150	309	359	426	162	159	227	189								YDR030C	164.186	182.065	441.683	462.742	151.785	225.884	248.087	194.926								YDR030C	1521	1.521	107.946	119.701	290.39	304.235	99.7928	148.51	163.108	128.156
YDR031W	158	282	407	344	131	111	143	131								YDR031W	172.942	166.156	500.738	373.669	122.74	157.693	156.284	135.107								YDR031W	366	0.366	472.52	453.978	1368.14	1020.95	335.354	430.855	427.006	369.146
YDR032C	2872	4308	5782	5617	2654	2403	3176	2735								YDR032C	3143.61	2538.3	7113.68	6101.46	2486.65	3413.84	3471.04	2820.75								YDR032C	597	0.597	5265.67	4251.76	11915.7	10220.2	4165.24	5718.32	5814.13	4724.88
YDR033W	40064	88713	55001	52294	46028	42000	56463	54638								YDR033W	43852.9	52270.2	67668.6	56804.3	43125.6	59667.6	61708.2	56351.1								YDR033W	963	0.963	45537.8	54278.5	70268.5	58986.8	44782.6	61960.1	64079.1	58516.2
YDR034C	2044	1873	3295	3484	2281	1986	3005	2799								YDR034C	2237.3	1103.58	4053.89	3784.49	2137.17	2821.42	3284.15	2886.76								YDR034C	2373	2.373	942.816	465.058	1708.34	1594.81	900.619	1188.97	1383.97	1216.5
YDR034C-D	9291	7838	24231	28886	14466	16683	29305	22148								YDR034C-D	10169.7	4618.19	29811.8	31377.4	13553.8	23700.8	32027.3	22842.4								YDR034C-D	5313	5.313	1914.11	869.225	5611.1	5905.77	2551.07	4460.91	6028.11	4299.34
YDR034C-C	0	0	0	0	0	0	0	0								YDR034C-C	0	0	0	0	0	0	0	0								YDR034C-C	1317	1.317	0	0	0	0	0	0	0	0
YDR034C-A	1	0	6	5	1	2	6	0								YDR034C-A	1.09457	0	7.38189	5.43124	0.936944	2.84131	6.55738	0								YDR034C-A	177	0.177	6.18402	0	41.7056	30.685	5.29347	16.0526	37.0473	0
YDR034W-B	15	36	574	576	26	25	20	25								YDR034W-B	16.4186	21.2114	706.201	625.679	24.3605	35.5164	21.8579	25.7838								YDR034W-B	156	0.156	105.247	135.971	4526.93	4010.76	156.157	227.669	140.115	165.281
YDR035W	4960	5233	6968	7082	6942	5922	7227	6944								YDR035W	5429.07	3083.31	8572.83	7692.81	6504.26	8413.13	7898.36	7161.72								YDR035W	1113	1.113	4877.87	2770.27	7702.46	6911.78	5843.9	7558.96	7096.46	6434.61
YDR037W	58192	57931	55657	59461	74610	67197	85230	79971								YDR037W	63695.3	34133.3	68475.6	64589.4	69905.4	95463.8	93147.5	82478.3								YDR037W	1776	1.776	35864.5	19219.2	38556.1	36367.9	39361.1	53752.2	52447.9	46440.5
YDR038C	4028	3765	8074	8858	4574	4519	6447	5552								YDR038C	4408.93	2218.36	9933.56	9621.99	4285.58	6419.95	7045.9	5726.07								YDR038C	3276	3.276	1345.83	677.155	3032.22	2937.11	1308.17	1959.69	2150.76	1747.89
YDR039C	3622	3686	8731	9399	4288	4241	6113	5318								YDR039C	3964.54	2171.81	10741.9	10209.6	4017.61	6025	6680.87	5484.74								YDR039C	3276	3.276	1210.18	662.946	3278.96	3116.5	1226.38	1839.13	2039.34	1674.22
YDR040C	4252	4223	12534	13431	4768	4909	7535	6253								YDR040C	4654.12	2488.22	15420.8	14589.4	4467.35	6974	8234.97	6449.05								YDR040C	3276	3.276	1420.67	759.529	4707.19	4453.42	1363.66	2128.82	2513.73	1968.57
YDR041W	2125	3562	3634	3524	1894	1724	2538	2259								YDR041W	2325.96	2098.75	4470.96	3827.94	1774.57	2449.21	2773.77	2329.83								YDR041W	612	0.612	3800.59	3429.33	7305.5	6254.8	2899.63	4001.98	4532.3	3806.91
YDR042C	182	351	135	107	181	153	183	154								YDR042C	199.212	206.811	166.093	116.229	169.587	217.36	200	158.828								YDR042C	603	0.603	330.368	342.971	275.444	192.75	281.238	360.465	331.675	263.397
YDR043C	811	1509	2735	2504	784	661	1045	912								YDR043C	887.697	889.111	3364.91	2719.97	734.564	939.054	1142.08	940.594								YDR043C	696	0.696	1275.43	1277.46	4834.64	3908	1055.41	1349.22	1640.91	1351.43
YDR044W	2763	3256	3075	3177	3036	2730	3383	3233								YDR044W	3024.3	1918.45	3783.22	3451.01	2844.56	3878.39	3697.27	3334.36								YDR044W	987	0.987	3064.13	1943.72	3833.05	3496.46	2882.03	3929.47	3745.97	3378.28
YDR045C	500	753	489	532	524	402	578	484								YDR045C	547.285	443.672	601.624	577.884	490.958	571.104	631.694	499.175								YDR045C	333	0.333	1643.5	1332.35	1806.68	1735.39	1474.35	1715.03	1896.98	1499.02
YDR046C	4832	5379	6856	6573	5301	4777	6215	5305								YDR046C	5288.97	3169.34	8435.04	7139.91	4966.74	6786.48	6792.35	5471.33								YDR046C	1815	1.815	2914.03	1746.19	4647.4	3933.83	2736.5	3739.1	3742.34	3014.51
YDR047W	1317	1319	1608	1592	1389	1257	1617	1441								YDR047W	1441.55	777.162	1978.35	1729.31	1301.41	1785.77	1767.21	1486.18								YDR047W	1089	1.089	1323.74	713.648	1816.66	1587.98	1195.05	1639.82	1622.79	1364.72
YDR048C	7	15	27	25	9	6	9	14								YDR048C	7.662	8.83809	33.2185	27.1562	8.43249	8.52394	9.83607	14.4389								YDR048C	315	0.315	24.3238	28.0574	105.456	86.2102	26.7698	27.0601	31.2256	45.8379
YDR049W	1330	998	1971	2253	1379	1396	1972	1813								YDR049W	1455.78	588.027	2424.95	2447.32	1292.05	1983.24	2155.19	1869.84								YDR049W	1899	1.899	766.603	309.651	1276.96	1288.74	680.382	1044.36	1134.91	984.646
YDR050C	43084	45572	51990	50846	46143	40419	51389	48651								YDR050C	47158.5	26851.3	63964.1	55231.4	43233.4	57421.5	56162.8	50176.4								YDR050C	747	0.747	63130.5	35945.5	85627.9	73937.6	57876	76869.5	75184.5	67170.5
YDR051C	893	1799	1196	1256	865	814	1102	949								YDR051C	977.452	1059.98	1471.46	1364.33	810.456	1156.41	1204.37	978.754								YDR051C	1005	1.005	972.589	1054.71	1464.14	1357.54	806.424	1150.66	1198.38	973.885
YDR052C	2053	1894	4392	4752	2294	2294	3579	3171								YDR052C	2247.15	1115.96	5403.54	5161.85	2149.35	3258.99	3911.48	3270.42								YDR052C	2115	2.115	1062.48	527.639	2554.87	2440.59	1016.24	1540.89	1849.4	1546.3
YDR053W	2	7	4	5	6	0	4	3								YDR053W	2.18914	4.12444	4.92126	5.43124	5.62166	0	4.37158	3.09406								YDR053W	396	0.396	5.52814	10.4153	12.4274	13.7153	14.1961	0	11.0394	7.81328
YDR054C	3390	4205	7094	7148	3861	3758	5049	4707								YDR054C	3710.6	2477.61	8727.85	7764.5	3617.54	5338.83	5518.03	4854.58								YDR054C	888	0.888	4178.6	2790.1	9828.66	8743.81	4073.81	6012.19	6214	5466.87
YDR055W	10036	10688	45496	48163	9904	9169	15549	13252								YDR055W	10985.1	6297.43	55974.4	52317	9279.49	13026	16993.4	13667.5								YDR055W	1335	1.335	8228.55	4717.18	41928.4	39188.7	6950.93	9757.3	12729.2	10237.8
YDR056C	2025	3210	3451	3433	2108	2107	2859	2674								YDR056C	2216.51	1891.35	4245.82	3729.09	1975.08	2993.32	3124.59	2757.84								YDR056C	618	0.618	3586.58	3060.44	6870.25	6034.13	3195.92	4843.56	5055.97	4462.52
YDR057W	580	704	1367	1401	742	653	1018	903								YDR057W	634.851	414.801	1681.84	1521.83	695.212	927.689	1112.57	931.312								YDR057W	1629	1.629	389.718	254.635	1032.44	934.213	426.772	569.483	682.976	571.708
YDR058C	203	282	504	543	151	131	210	149								YDR058C	222.198	166.156	620.079	589.833	141.478	186.106	229.508	153.672								YDR058C	981	0.981	226.501	169.374	632.088	601.257	144.219	189.71	233.953	156.648
YDR059C	834	1265	2473	2710	616	522	974	848								YDR059C	912.872	745.345	3042.57	2943.73	577.157	741.583	1064.48	874.587								YDR059C	447	0.447	2042.22	1667.44	6806.64	6585.53	1291.18	1659.02	2381.39	1956.57
YDR060W	9076	12378	12632	15223	13271	13257	17529	16020								YDR060W	9934.33	7293.19	15541.3	16536	12434.2	18833.6	19157.4	16522.3								YDR060W	3078	3.078	3227.53	2369.46	5049.17	5372.31	4039.69	6118.79	6223.97	5367.86
YDR061W	1583	1751	2620	2651	1668	1493	2210	2014								YDR061W	1732.71	1031.7	3223.43	2879.64	1562.82	2121.04	2415.3	2077.15								YDR061W	1620	1.62	1069.57	636.851	1989.77	1777.56	964.705	1309.28	1490.93	1282.19
YDR062W	8448	9102	9610	9846	9524	8974	11613	10996								YDR062W	9246.94	5362.95	11823.3	10695.2	8923.45	12749	12691.8	11340.8								YDR062W	1686	1.686	5484.54	3180.87	7012.65	6343.53	5292.68	7561.67	7527.76	6726.43
YDR063W	1615	3063	2639	2450	1425	1218	2044	1854								YDR063W	1767.73	1804.74	3246.8	2661.31	1335.14	1730.36	2233.88	1912.13								YDR063W	450	0.45	3928.29	4010.53	7215.11	5914.02	2966.99	3845.24	4964.18	4249.17
YDR064W	58681	111064	50565	47868	57602	53320	65777	66441								YDR064W	64230.5	65439.5	62210.9	51996.5	53969.8	75749.4	71887.4	68524.1								YDR064W	456	0.456	140856	143508	136427	114027	118355	166117	157648	150272
YDR065W	306	509	303	355	275	261	336	301								YDR065W	334.939	299.906	372.785	385.618	257.66	370.791	367.213	310.437								YDR065W	1098	1.098	305.044	273.138	339.513	351.2	234.663	337.697	334.438	282.73
YDR066C	201	390	345	401	198	164	235	218								YDR066C	220.009	229.79	424.459	435.585	185.515	232.988	256.831	224.835								YDR066C	591	0.591	372.265	388.816	718.204	737.031	313.9	394.226	434.57	380.431
YDR067C	526	1013	954	1054	531	494	636	575								YDR067C	575.744	596.865	1173.72	1144.91	497.517	701.804	695.082	593.028								YDR067C	675	0.675	852.955	884.245	1738.85	1696.16	737.062	1039.71	1029.75	878.56
YDR068W	210	404	522	660	341	263	454	366								YDR068W	229.86	238.039	642.224	716.924	319.498	373.633	496.175	377.475								YDR068W	933	0.933	246.366	255.133	688.343	768.407	342.441	400.464	531.806	404.582
YDR069C	1107	1690	2457	2593	1255	1112	1931	1595								YDR069C	1211.69	995.758	3022.88	2816.64	1175.86	1579.77	2110.38	1645.01								YDR069C	2781	2.781	435.703	358.057	1086.98	1012.82	422.821	568.058	758.857	591.517
YDR070C	81	132	379	430	70	68	98	95								YDR070C	88.6602	77.7752	466.289	467.087	65.5861	96.6046	107.104	97.9785								YDR070C	282	0.282	314.398	275.798	1653.51	1656.34	232.575	342.57	379.801	347.442
YDR071C	4755	8733	6557	6438	4811	4401	5839	5153								YDR071C	5204.68	5145.53	8067.18	6993.27	4507.64	6252.31	6381.42	5314.56								YDR071C	576	0.576	9035.91	8933.22	14005.5	12141.1	7825.76	10854.7	11078.9	9226.67
YDR072C	5513	6176	8255	8358	5292	5291	7638	6741								YDR072C	6034.37	3638.93	10156.2	9078.86	4958.31	7516.69	8347.54	6952.35								YDR072C	1584	1.584	3809.58	2297.31	6411.77	5731.6	3130.24	4745.39	5269.91	4389.11
YDR073W	1345	1524	1450	1297	1213	1174	1477	1350								YDR073W	1472.2	897.95	1783.96	1408.86	1136.51	1667.85	1614.21	1392.33								YDR073W	510	0.51	2886.66	1760.69	3497.95	2762.48	2228.46	3270.3	3165.11	2730.05
YDR074W	5246	3903	18780	17992	4799	4197	7887	6676								YDR074W	5742.12	2299.67	23105.3	19543.8	4496.39	5962.49	8619.67	6885.31								YDR074W	2691	2.691	2133.82	854.578	8586.14	7262.64	1670.9	2215.72	3203.15	2558.64
YDR075W	806	1164	1196	1337	813	869	1131	985								YDR075W	882.224	685.835	1471.46	1452.31	761.735	1234.55	1236.07	1015.88								YDR075W	927	0.927	951.698	739.844	1587.33	1566.68	821.721	1331.77	1333.4	1095.88
YDR076W	334	182	383	387	342	353	423	411								YDR076W	365.587	107.235	471.211	420.378	320.435	501.492	462.295	423.886								YDR076W	1221	1.221	299.416	87.8259	385.922	344.29	262.436	410.722	378.62	347.163
YDR077W	228600	200950	1570911	1722801	184868	185259	349587	293144								YDR077W	250219	118401	1.93272e+06	1.87139e+06	173211	263189	382062	302335								YDR077W	1017	1.017	246036	116422	1.90041e+06	1.84011e+06	170316	258790	375676	297281
YDR078C	271	484	231	264	248	257	316	230								YDR078C	296.629	285.176	284.203	286.769	232.362	365.109	345.355	237.211								YDR078C	672	0.672	441.412	424.368	422.921	426.74	345.777	543.316	513.921	352.993
YDR079W	332	582	571	586	304	294	366	319								YDR079W	363.398	342.918	702.51	636.541	284.831	417.673	400	329.002								YDR079W	336	0.336	1081.54	1020.59	2090.8	1894.47	847.711	1243.07	1190.48	979.172
YDR079C-A	101	123	74	90	66	70	80	75								YDR079C-A	110.552	72.4723	91.0433	97.7623	61.8383	99.4459	87.4317	77.3515								YDR079C-A	219	0.219	504.802	330.924	415.723	446.403	282.367	454.091	399.231	353.203
YDR080W	1017	1875	2281	2811	1353	1113	1886	1794								YDR080W	1113.18	1104.76	2806.35	3053.44	1267.68	1581.19	2061.2	1850.25								YDR080W	2979	2.979	373.675	370.85	942.044	1024.99	425.54	530.779	691.911	621.097
YDR081C	2046	2017	3797	4047	2254	2215	3395	3073								YDR081C	2239.49	1188.43	4671.51	4396.05	2111.87	3146.75	3710.38	3169.35								YDR081C	2778	2.778	806.153	427.8	1681.61	1582.45	760.213	1132.74	1335.63	1140.87
YDR082W	212	408	296	344	245	238	347	319								YDR082W	232.049	240.396	364.173	373.669	229.551	338.116	379.235	329.002								YDR082W	1485	1.485	156.262	161.883	245.234	251.629	154.58	227.688	255.377	221.55
YDR083W	1884	3291	2682	2609	2092	2194	2868	2750								YDR083W	2062.17	1939.08	3299.7	2834.02	1960.09	3116.92	3134.43	2836.22								YDR083W	1179	1.179	1749.09	1644.68	2798.73	2403.75	1662.5	2643.7	2658.55	2405.62
YDR084C	1354	2580	1701	1607	1438	1392	1588	1495								YDR084C	1482.05	1520.15	2092.77	1745.6	1347.33	1977.55	1735.52	1541.87								YDR084C	600	0.6	2470.08	2533.58	3487.94	2909.33	2245.54	3295.92	2892.53	2569.79
YDR085C	788	551	4084	3914	795	760	1509	1171								YDR085C	862.522	324.652	5024.61	4251.58	744.87	1079.7	1649.18	1207.71								YDR085C	1863	1.863	462.975	174.263	2697.05	2282.11	399.823	579.548	885.228	648.263
YDR086C	4038	8322	4155	3787	4007	3517	4678	4337								YDR086C	4419.88	4903.37	5111.96	4113.62	3754.33	4996.45	5112.57	4472.98								YDR086C	243	0.243	18188.8	20178.5	21036.9	16928.5	15449.9	20561.5	21039.4	18407.3
YDR087C	1508	2043	2392	2411	1568	1655	1796	1727								YDR087C	1650.61	1203.75	2942.91	2618.94	1469.13	2351.19	1962.84	1781.15								YDR087C	837	0.837	1972.06	1438.17	3516.03	3128.97	1755.23	2809.06	2345.09	2128.01
YDR088C	264	410	529	623	262	260	491	344								YDR088C	288.967	241.574	650.837	676.733	245.479	369.371	536.612	354.785								YDR088C	1149	1.149	251.494	210.247	566.437	588.975	213.646	321.471	467.025	308.778
YDR089W	3093	2984	6557	6570	3458	2729	4981	4446								YDR089W	3385.51	1758.19	8067.18	7136.65	3239.95	3876.97	5443.72	4585.4								YDR089W	2610	2.61	1297.13	673.636	3090.87	2734.35	1241.36	1485.43	2085.71	1756.86
YDR090C	1181	1456	1286	1280	1193	1158	1435	1327								YDR090C	1292.69	857.884	1582.19	1390.4	1117.77	1645.12	1568.31	1368.61								YDR090C	933	0.933	1385.52	919.489	1695.8	1490.24	1198.04	1763.26	1680.93	1466.89
YDR091C	11046	19074	13630	14307	13427	12779	15816	15532								YDR091C	12090.6	11238.5	16769.2	15541	12580.3	18154.6	17285.2	16019								YDR091C	1827	1.827	6617.75	6151.35	9178.54	8506.27	6885.79	9936.82	9461	8767.91
YDR092W	2617	3055	3706	3850	2317	2228	3014	2468								YDR092W	2864.49	1800.02	4559.55	4182.06	2170.9	3165.22	3293.99	2545.38								YDR092W	462	0.462	6200.2	3896.15	9869.15	9052.07	4698.91	6851.13	7129.85	5509.48
YDR093W	6022	3878	7161	7174	6124	6244	8052	7611								YDR093W	6591.51	2284.94	8810.29	7792.74	5737.84	8870.58	8800	7849.63								YDR093W	4839	4.839	1362.16	472.193	1820.68	1610.4	1185.75	1833.14	1818.56	1622.16
YDR094W	0	2	1	1	0	3	0	1								YDR094W	0	1.17841	1.23031	1.08625	0	4.26197	0	1.03135								YDR094W	336	0.336	0	3.50718	3.66165	3.23288	0	12.6844	0	3.0695
YDR095C	2	11	1	2	2	4	1	1								YDR095C	2.18914	6.48126	1.23031	2.1725	1.87389	5.68263	1.0929	1.03135								YDR095C	411	0.411	5.32638	15.7695	2.99347	5.28588	4.55934	13.8263	2.65911	2.50938
YDR096W	3339	2327	6251	6375	3049	2763	4761	3790								YDR096W	3654.77	1371.08	7690.7	6924.83	2856.74	3925.27	5203.28	3908.83								YDR096W	2685	2.685	1361.18	510.645	2864.32	2579.08	1063.96	1461.93	1937.91	1455.8
YDR097C	2655	3005	5740	6194	3251	2993	4893	4282								YDR097C	2906.09	1770.56	7062.01	6728.22	3046	4252.02	5347.54	4416.25								YDR097C	3729	3.729	779.32	474.809	1893.81	1804.3	816.842	1140.26	1434.04	1184.3
YDR098C	3073	4413	4427	4382	3011	2709	3396	3322								YDR098C	3363.62	2600.16	5446.6	4759.94	2821.14	3848.56	3711.48	3426.16								YDR098C	858	0.858	3920.3	3030.5	6348.02	5547.71	3288.04	4485.5	4325.73	3993.19
YDR098C-B	45476	20136	82560	92003	76080	85066	134375	107042								YDR098C-B	49776.7	11864.2	101575	99938.1	71282.7	120850	146858	110398								YDR098C-B	5268	5.268	9448.88	2252.13	19281.5	18970.8	13531.3	22940.3	27877.4	20956.4
YDR098C-A	0	0	0	0	0	0	0	0								YDR098C-A	0	0	0	0	0	0	0	0								YDR098C-A	1323	1.323	0	0	0	0	0	0	0	0
YDR099W	15821	13425	22322	22543	17159	15515	20890	18450								YDR099W	17317.2	7910.09	27463.1	24487.3	16077	22041.5	22830.6	19028.5								YDR099W	822	0.822	21067.2	9622.98	33410.1	29789.9	19558.4	26814.5	27774.5	23149
YDR101C	6544	7771	7261	8230	8575	8469	9662	9192								YDR101C	7162.87	4578.72	8933.32	8939.82	8034.29	12031.5	10559.6	9480.2								YDR101C	1782	1.782	4019.57	2569.43	5013.08	5016.74	4508.58	6751.71	5925.68	5319.98
YDR102C	25	17	18	11	24	24	32	17								YDR102C	27.3643	10.0165	22.1457	11.9487	22.4866	34.0958	34.9727	17.533								YDR102C	333	0.333	82.175	30.0796	66.5035	35.8821	67.5275	102.39	105.023	52.6517
YDR103W	3970	3416	6853	7312	4124	3856	6179	5646								YDR103W	4345.45	2012.73	8431.35	7942.65	3863.96	5478.05	6753.01	5823.02								YDR103W	2754	2.754	1577.87	730.838	3061.49	2884.04	1403.03	1989.13	2452.07	2114.39
YDR104C	581	551	1649	1676	591	646	1040	856								YDR104C	635.946	324.652	2028.79	1820.55	553.734	917.744	1136.61	882.838								YDR104C	3738	3.738	170.13	86.8519	542.747	487.039	148.136	245.517	304.07	236.179
YDR105C	2025	2733	2611	2764	1946	1868	2381	2137								YDR105C	2216.51	1610.3	3212.35	3002.39	1823.29	2653.79	2602.19	2204								YDR105C	1422	1.422	1558.72	1132.42	2259.04	2111.39	1282.2	1866.23	1829.95	1549.93
YDR106W	57	95	102	88	57	33	80	51								YDR106W	62.3905	55.9745	125.492	95.5898	53.4058	46.8817	87.4317	52.599								YDR106W	855	0.855	72.9714	65.4673	146.774	111.801	62.4629	54.8324	102.259	61.5193
YDR107C	770	947	1141	1078	660	609	805	681								YDR107C	842.82	557.978	1403.79	1170.98	618.383	865.18	879.781	702.351								YDR107C	2019	2.019	417.444	276.363	695.289	579.978	306.282	428.519	435.751	347.871
YDR108W	839	1464	1614	1692	965	913	1327	1252								YDR108W	918.345	862.597	1985.73	1837.93	904.151	1297.06	1450.27	1291.25								YDR108W	2097	2.097	437.933	411.348	946.938	876.458	431.164	618.531	691.594	615.763
YDR109C	759	470	1188	1250	745	728	1027	860								YDR109C	830.779	276.927	1461.61	1357.81	698.023	1034.24	1122.4	886.964								YDR109C	2148	2.148	386.769	128.923	680.454	632.128	324.964	481.489	522.535	412.925
YDR110W	1066	1785	1623	1804	1196	1159	1581	1330								YDR110W	1166.81	1051.73	1996.8	1959.59	1120.58	1646.54	1727.87	1371.7								YDR110W	1701	1.701	685.957	618.302	1173.9	1152.02	658.78	967.984	1015.8	806.408
YDR111C	817	796	941	1000	796	837	969	849								YDR111C	894.264	469.008	1157.73	1086.25	745.807	1189.09	1059.02	875.619								YDR111C	1524	1.524	586.788	307.748	759.663	712.761	489.375	780.242	694.893	574.553
YDR112W	2	0	0	2	2	0	1	2								YDR112W	2.18914	0	0	2.1725	1.87389	0	1.0929	2.06271								YDR112W	309	0.309	7.0846	0	0	7.03073	6.06436	0	3.53688	6.67542
YDR113C	1379	836	2121	2205	1220	1122	1681	1513								YDR113C	1509.41	492.576	2609.5	2395.18	1143.07	1593.98	1837.16	1560.44								YDR113C	1122	1.122	1345.29	439.016	2325.76	2134.74	1018.78	1420.66	1637.4	1390.76
YDR114C	4	4	4	3	7	0	1	6								YDR114C	4.37828	2.35682	4.92126	3.25874	6.55861	0	1.0929	6.18812								YDR114C	303	0.303	14.4498	7.77829	16.2418	10.7549	21.6456	0	3.60692	20.4228
YDR115W	1016	1813	1890	1695	931	913	1203	983								YDR115W	1112.08	1068.23	2325.3	1841.19	872.295	1297.06	1314.75	1013.82								YDR115W	318	0.318	3497.12	3359.21	7312.25	5789.91	2743.06	4078.8	4134.45	3188.11
YDR116C	2679	3392	3916	4017	2311	2069	3137	2686								YDR116C	2932.36	1998.59	4817.91	4363.46	2165.28	2939.34	3428.42	2770.21								YDR116C	858	0.858	3417.66	2329.35	5615.28	5085.62	2523.63	3425.8	3995.82	3228.69
YDR117C	1842	2580	3451	3791	2132	2006	3192	2672								YDR117C	2016.2	1520.15	4245.82	4117.97	1997.56	2849.84	3488.52	2755.78								YDR117C	1698	1.698	1187.4	895.26	2500.48	2425.19	1176.42	1678.35	2054.49	1622.95
YDR118W	369	581	887	916	457	391	620	563								YDR118W	403.897	342.329	1091.29	995.003	428.183	555.477	677.596	580.652								YDR118W	1959	1.959	206.175	174.747	557.065	507.914	218.572	283.551	345.889	296.402
YDR118W-A	26	37	55	57	25	47	50	43								YDR118W-A	28.4588	21.8006	67.6673	61.9161	23.4236	66.7708	54.6448	44.3482								YDR118W-A	117	0.117	243.238	186.33	578.353	529.198	200.202	570.691	467.05	379.044
YDR119W	8521	11302	11766	11597	9859	9112	12772	11577								YDR119W	9326.84	6659.2	14475.9	12597.2	9237.33	12945	13958.5	11940								YDR119W	2307	2.307	4042.84	2886.52	6274.77	5460.43	4004.04	5611.19	6050.49	5175.54
YDR119W-A	90	176	944	730	88	58	83	96								YDR119W-A	98.5114	103.7	1161.42	792.961	82.451	82.3981	90.7104	99.0099								YDR119W-A	201	0.201	490.106	515.921	5778.2	3945.08	410.204	409.941	451.295	492.587
YDR120C	6822	4708	5818	6660	7761	8274	8924	8361								YDR120C	7467.16	2773.98	7157.97	7234.41	7271.62	11754.5	9753.01	8623.14								YDR120C	1713	1.713	4359.11	1619.37	4178.62	4223.24	4244.96	6861.94	5693.52	5033.94
YDR121W	1118	2001	1567	1657	1104	1133	1364	1265								YDR121W	1223.73	1179	1927.9	1799.91	1034.39	1609.6	1490.71	1304.66								YDR121W	591	0.591	2070.61	1994.93	3262.1	3045.54	1750.23	2723.53	2522.35	2207.55
YDR122W	4343	2047	9198	9392	3842	3801	6128	5330								YDR122W	4753.72	1206.1	11316.4	10202	3599.74	5399.91	6697.27	5497.11								YDR122W	3195	3.195	1487.86	377.497	3541.92	3193.13	1126.68	1690.11	2096.17	1720.54
YDR123C	1133	837	1089	1269	1109	1004	1368	1262								YDR123C	1240.15	493.165	1339.81	1378.45	1039.07	1426.34	1495.08	1301.57								YDR123C	915	0.915	1355.35	538.978	1464.28	1506.5	1135.6	1558.84	1633.97	1422.48
YDR124W	132	98	195	175	120	124	170	148								YDR124W	144.483	57.7422	239.911	190.093	112.433	176.161	185.792	152.64								YDR124W	975	0.975	148.188	59.2227	246.063	194.968	115.316	180.678	190.556	156.554
YDR125C	275	282	393	410	273	246	305	280								YDR125C	301.007	166.156	483.514	445.362	255.786	349.481	333.333	288.779								YDR125C	1362	1.362	221.004	121.994	355.003	326.991	187.801	256.594	244.738	212.026
YDR126W	415	806	675	735	497	448	635	486								YDR126W	454.247	474.9	830.463	798.392	465.661	636.454	693.989	501.238								YDR126W	1011	1.011	449.305	469.733	821.427	789.706	460.594	629.529	686.438	495.784
YDR127W	20609	16798	26130	27810	27450	26248	33741	30103								YDR127W	22558	9897.48	32148.1	30208.6	25719.1	37289.4	36875.4	31046.8								YDR127W	4767	4.767	4732.12	2076.25	6743.89	6337.02	5395.24	7822.4	7735.56	6512.86
YDR128W	2562	1784	4166	4278	2814	2704	3878	3464								YDR128W	2804.29	1051.14	5125.49	4646.97	2636.56	3841.45	4238.25	3572.61								YDR128W	3447	3.447	813.545	304.944	1486.94	1348.12	764.885	1114.43	1229.55	1036.44
YDR129C	15270	17473	24168	25556	16698	14748	20242	17809								YDR129C	16714.1	10295.2	29734.3	27760.2	15645.1	20951.8	22122.4	18367.4								YDR129C	1929	1.929	8664.64	5337.06	15414.3	14391	8110.46	10861.5	11468.3	9521.7
YDR130C	484	473	898	897	506	495	656	628								YDR130C	529.772	278.694	1104.82	974.365	474.094	703.225	716.94	647.69								YDR130C	876	0.876	604.763	318.144	1261.21	1112.29	541.203	802.768	818.425	739.372
YDR131C	582	937	1234	1257	681	570	926	877								YDR131C	637.04	552.086	1518.21	1365.41	638.059	809.774	1012.02	904.497								YDR131C	1671	1.671	381.233	330.392	908.563	817.124	381.842	484.604	605.638	541.291
YDR132C	682	927	1197	1286	778	736	1043	856								YDR132C	746.497	546.194	1472.69	1396.92	728.942	1045.6	1139.89	882.838								YDR132C	1488	1.488	501.678	367.066	989.709	938.787	489.881	702.69	766.056	593.305
YDR133C	13307	16145	27428	24944	11701	10437	17379	16272								YDR133C	14565.5	9512.73	33745.1	27095.4	10963.2	14827.4	18993.4	16782.2								YDR133C	336	0.336	43349.6	28311.7	100432	80641	32628.5	44129.1	56528.1	49947
YDR135C	16220	15764	21079	23692	19710	18320	26868	22314								YDR135C	17753.9	9288.24	25933.8	25735.4	18467.2	26026.4	29363.9	23013.6								YDR135C	4548	4.548	3903.68	2042.27	5702.24	5658.62	4060.5	5722.61	6456.45	5060.16
YDR136C	4	6	2	4	5	4	5	1								YDR136C	4.37828	3.53523	2.46063	4.34499	4.68472	5.68263	5.46448	1.03135								YDR136C	573	0.573	7.64098	6.16969	4.29429	7.58288	8.17577	9.91732	9.53662	1.79992
YDR137W	982	1901	2052	2287	1076	1078	1762	1556								YDR137W	1074.87	1120.08	2524.61	2484.25	1008.15	1531.47	1925.68	1604.79								YDR137W	1992	1.992	539.593	562.289	1267.37	1247.11	506.1	768.809	966.708	805.615
YDR138W	1454	1432	2005	2226	1820	1723	2515	2193								YDR138W	1591.51	843.743	2466.78	2417.99	1705.24	2447.79	2748.63	2261.76								YDR138W	2259	2.259	704.518	373.503	1091.98	1070.38	754.864	1083.57	1216.75	1001.22
YDR139C	1049	2069	992	940	1050	918	1212	1107								YDR139C	1148.2	1219.07	1220.47	1021.07	983.791	1304.16	1324.59	1141.71								YDR139C	234	0.234	4906.86	5209.69	5215.69	4363.56	4204.23	5573.34	5660.64	4879.09
YDR140W	1253	1453	1279	1277	1147	1159	1426	1386								YDR140W	1371.5	856.116	1573.57	1387.14	1074.67	1646.54	1558.47	1429.46								YDR140W	666	0.666	2059.31	1285.46	2362.72	2082.79	1613.63	2472.28	2340.04	2146.33
YDR141C	4554	5152	9379	10233	5883	5268	8710	7827								YDR141C	4984.68	3035.59	11539.1	11115.6	5512.04	7484.02	9519.13	8072.4								YDR141C	5097	5.097	977.963	595.564	2263.91	2180.81	1081.43	1468.32	1867.59	1583.76
YDR142C	827	870	1352	1372	839	713	1059	952								YDR142C	905.21	512.609	1663.39	1490.33	786.096	1012.93	1157.38	981.848								YDR142C	1128	1.128	802.491	454.441	1474.63	1321.22	696.893	897.986	1026.04	870.433
YDR143C	5025	3588	5770	6103	4917	5247	6444	6122								YDR143C	5500.22	2114.07	7098.92	6629.37	4606.95	7454.18	7042.62	6313.94								YDR143C	1833	1.833	3000.66	1153.34	3872.84	3616.68	2513.34	4066.66	3842.13	3444.6
YDR144C	8388	6914	7097	6895	10145	10001	12139	11274								YDR144C	9181.26	4073.77	8731.55	7489.68	9505.29	14208	13266.7	11627.5								YDR144C	1791	1.791	5126.33	2274.58	4875.23	4181.84	5307.26	7932.99	7407.41	6492.17
YDR145W	3481	2320	6188	6560	3392	3486	5440	4767								YDR145W	3810.2	1366.96	7613.19	7125.79	3178.11	4952.41	5945.36	4916.46								YDR145W	1620	1.62	2351.98	843.801	4699.5	4398.63	1961.8	3057.04	3669.97	3034.85
YDR146C	3398	2902	9198	9254	3857	3687	6145	5162								YDR146C	3719.35	1709.88	11316.4	10052.1	3613.79	5237.96	6715.85	5323.84								YDR146C	2130	2.13	1746.17	802.758	5312.88	4719.31	1696.62	2459.14	3152.98	2499.46
YDR147W	1181	1755	1751	1743	1294	1158	1581	1413								YDR147W	1292.69	1034.06	2154.28	1893.33	1212.41	1645.12	1727.87	1457.3								YDR147W	1605	1.605	805.413	644.272	1342.23	1179.65	755.393	1025	1076.55	907.976
YDR148C	7419	7809	10775	10469	6423	5758	8308	7251								YDR148C	8120.62	4601.11	13256.6	11371.9	6017.99	8180.14	9079.78	7478.34								YDR148C	1392	1.392	5833.78	3305.39	9523.45	8169.49	4323.27	5876.54	6522.83	5372.37
YDR149C	1	0	2	4	1	3	2	4								YDR149C	1.09457	0	2.46063	4.34499	0.936944	4.26197	2.18579	4.12541								YDR149C	708	0.708	1.546	0	3.47547	6.13699	1.32337	6.01973	3.08728	5.82685
YDR150W	7620	4905	14672	17491	7860	8526	15274	12449								YDR150W	8340.63	2890.05	18051.2	18999.6	7364.38	12112.5	16692.9	12839.3								YDR150W	8247	8.247	1011.35	350.437	2188.82	2303.82	892.977	1468.72	2024.12	1556.85
YDR151C	2648	2548	4658	4912	2336	2338	3526	2985								YDR151C	2898.42	1501.3	5730.81	5335.65	2188.7	3321.49	3853.55	3078.59								YDR151C	978	0.978	2963.62	1535.07	5859.72	5455.68	2237.94	3396.21	3940.24	3147.84
YDR152W	2623	2902	4291	4743	2710	2670	3703	3372								YDR152W	2871.06	1709.88	5279.28	5152.07	2539.12	3793.15	4046.99	3477.72								YDR152W	798	0.798	3597.82	2142.7	6615.64	6456.23	3181.85	4753.32	5071.42	4358.05
YDR153C	3616	3534	5755	6191	3689	3759	4979	4394								YDR153C	3957.97	2082.25	7080.46	6724.96	3456.39	5340.25	5441.53	4531.77								YDR153C	1236	1.236	3202.24	1684.67	5728.53	5440.91	2796.43	4320.59	4402.53	3666.48
YDR154C	3200	5219	1578	1544	2742	2969	3572	2950								YDR154C	3502.63	3075.06	1941.44	1677.17	2569.1	4217.93	3903.83	3042.49								YDR154C	351	0.351	9978.99	8760.87	5531.16	4778.25	7319.37	12016.9	11122	8668.07
YDR155C	28629	43413	18855	18636	27234	22824	27898	25427								YDR155C	31336.5	25579.2	23197.6	20243.3	25516.7	32425.1	30489.6	26224.2								YDR155C	489	0.489	64082.8	52309.2	47438.8	41397.4	52181.4	66308.9	62351	53628.3
YDR156W	1704	1989	2412	2512	1671	1736	1823	1825								YDR156W	1865.15	1171.93	2967.52	2728.66	1565.63	2466.26	1992.35	1882.22								YDR156W	414	0.414	4505.19	2830.75	7167.92	6590.95	3781.72	5957.15	4812.44	4546.42
YDR157W	116	91	121	122	104	89	127	122								YDR157W	126.97	53.6177	148.868	132.522	97.4421	126.438	138.798	125.825								YDR157W	402	0.402	315.846	133.377	370.319	329.657	242.393	314.523	345.268	312.998
YDR158W	18546	19154	18497	18147	25575	22619	27866	26150								YDR158W	20299.9	11285.6	22757.1	19712.1	23962.3	32133.8	30454.6	26969.9								YDR158W	1098	1.098	18488.1	10278.4	20726	17952.8	21823.6	29265.8	27736.5	24562.7
YDR159W	1930	2221	3673	4124	2198	2372	3676	3119								YDR159W	2112.52	1308.63	4518.95	4479.69	2059.4	3369.8	4017.49	3216.79								YDR159W	3906	3.906	540.84	335.03	1156.92	1146.87	527.241	862.723	1028.54	823.551
YDR160W	792	557	868	926	920	833	1076	975								YDR160W	866.9	328.188	1067.91	1005.87	861.988	1183.41	1175.96	1005.57								YDR160W	2559	2.559	338.765	128.248	417.317	393.07	336.846	462.449	459.537	392.954
YDR161W	1842	1538	2010	2025	1952	2016	2192	2187								YDR161W	2016.2	906.198	2472.93	2199.65	1828.91	2864.04	2395.63	2255.57								YDR161W	1164	1.164	1732.13	778.521	2124.51	1889.74	1571.23	2460.52	2058.1	1937.77
YDR162C	645	639	1469	1582	696	582	882	802								YDR162C	705.998	376.502	1807.33	1718.44	652.113	826.822	963.934	827.145								YDR162C	711	0.711	992.965	529.539	2541.96	2416.94	917.177	1162.9	1355.74	1163.35
YDR163W	276	318	842	865	259	283	361	308								YDR163W	302.102	187.367	1035.93	939.605	242.668	402.046	394.536	317.657								YDR163W	528	0.528	572.162	354.863	1961.98	1779.55	459.599	761.45	747.226	601.623
YDR164C	2725	2681	3543	3680	3034	2787	3843	3632								YDR164C	2982.71	1579.66	4359.01	3997.39	2842.69	3959.37	4200	3745.87								YDR164C	2175	2.175	1371.36	726.281	2004.14	1837.88	1306.98	1820.4	1931.03	1722.24
YDR165W	3387	5729	4429	4741	4253	4053	5124	4763								YDR165W	3707.31	3375.56	5449.06	5149.9	3984.82	5757.92	5600	4912.33								YDR165W	1335	1.335	2777.01	2528.51	4081.7	3857.6	2984.89	4313.05	4194.76	3679.65
YDR167W	778	1416	1021	1044	833	734	875	826								YDR167W	851.576	834.315	1256.15	1134.04	780.474	1042.76	956.284	851.898								YDR167W	621	0.621	1371.3	1343.5	2022.79	1826.16	1256.8	1679.17	1539.91	1371.82
YDR168W	1809	5032	2669	3507	2580	2053	3136	2709								YDR168W	1980.08	2964.88	3283.71	3809.47	2417.31	2916.61	3427.32	2793.94								YDR168W	1521	1.521	1301.83	1949.3	2158.92	2504.58	1589.29	1917.56	2253.33	1836.91
YDR169C	2788	1557	4690	5083	2377	2387	3710	3122								YDR169C	3051.66	917.393	5770.18	5521.4	2227.12	3391.11	4054.64	3219.88								YDR169C	1542	1.542	1979.03	594.937	3742.01	3580.67	1444.3	2199.16	2629.47	2088.12
YDR169C-A	17	20	12	9	15	17	37	21								YDR169C-A	18.6077	11.7841	14.7638	9.77623	14.0542	24.1512	40.4372	21.6584								YDR169C-A	150	0.15	124.051	78.5608	98.4252	65.1749	93.6944	161.008	269.581	144.389
YDR170C	20586	15166	26150	30264	25347	24696	36646	31759								YDR170C	22532.8	8935.89	32172.7	32874.2	23748.7	35084.5	40050.3	32754.7								YDR170C	6030	6.03	3736.79	1481.91	5335.45	5451.78	3938.43	5818.33	6641.84	5431.96
YDR170W-A	5677	3929	6508	7552	8288	9014	13023	10216								YDR170W-A	6213.88	2314.99	8006.89	8203.35	7765.39	12805.8	14232.8	10536.3								YDR170W-A	1323	1.323	4696.81	1749.8	6052.07	6200.56	5869.53	9679.36	10758	7963.95
YDR171W	2092	1711	8995	8481	1617	1149	3275	2650								YDR171W	2289.84	1008.13	11066.7	9212.47	1515.04	1632.33	3579.23	2733.09								YDR171W	1128	1.128	2030	893.733	9810.89	8167.08	1343.12	1447.1	3173.08	2422.95
YDR172W	17212	17452	23963	26459	20615	19422	25884	23850								YDR172W	18839.8	10282.8	29482	28741	19315.1	27592	28288.5	24597.8								YDR172W	2058	2.058	9154.4	4996.51	14325.6	13965.5	9385.37	13407.2	13745.6	11952.3
YDR173C	288	252	335	324	286	227	331	276								YDR173C	315.236	148.48	412.156	351.944	267.966	322.489	361.749	284.653								YDR173C	1068	1.068	295.165	139.026	385.913	329.536	250.904	301.956	338.716	266.529
YDR174W	4053	3968	3807	3772	3678	3457	4127	3981								YDR174W	4436.3	2337.97	4683.81	4097.33	3446.08	4911.21	4510.38	4105.82								YDR174W	741	0.741	5986.9	3155.15	6320.93	5529.46	4650.58	6627.81	6086.89	5540.91
YDR175C	871	1139	1448	1439	705	706	1078	922								YDR175C	953.371	671.105	1781.5	1563.11	660.545	1002.98	1178.14	950.908								YDR175C	960	0.96	993.095	699.068	1855.73	1628.24	688.068	1044.77	1227.23	990.529
YDR176W	1044	974	1834	1994	1147	1213	1850	1462								YDR176W	1142.73	573.886	2256.4	2165.98	1074.67	1723.26	2021.86	1507.84								YDR176W	2109	2.109	541.836	272.113	1069.89	1027.02	509.566	817.096	958.681	714.954
YDR177W	3077	5133	4816	4980	3558	3117	4363	3750								YDR177W	3367.99	3024.39	5925.2	5409.52	3333.65	4428.19	4768.31	3867.57								YDR177W	648	0.648	5197.52	4667.27	9143.82	8348.02	5144.51	6833.62	7358.5	5968.48
YDR178W	4120	6678	6790	6891	3104	2691	4393	3976								YDR178W	4509.63	3934.72	8353.84	7485.34	2908.27	3822.99	4801.09	4100.66								YDR178W	546	0.546	8259.4	7206.44	15300.1	13709.4	5326.51	7001.81	8793.21	7510.37
YDR179C	57	105	125	157	102	54	86	73								YDR179C	62.3905	61.8666	153.789	170.541	95.5683	76.7154	93.9891	75.2888								YDR179C	489	0.489	127.588	126.517	314.498	348.755	195.436	156.882	192.207	153.965
YDR179W-A	826	1846	1027	1019	937	813	1034	1033								YDR179W-A	904.116	1087.67	1263.53	1106.89	877.916	1154.99	1130.05	1065.39								YDR179W-A	1392	1.392	649.508	781.375	907.711	795.177	630.687	829.737	811.821	765.365
YDR180W	1654	2787	2398	2794	2328	2105	3051	2724								YDR180W	1810.42	1642.12	2950.3	3034.98	2181.2	2990.48	3334.43	2809.41								YDR180W	4482	4.482	403.931	366.38	658.254	677.148	486.659	667.22	743.959	626.82
YDR181C	558	1163	1032	1070	591	530	843	701								YDR181C	610.771	685.246	1269.69	1162.29	553.734	752.948	921.311	722.979								YDR181C	1446	1.446	422.386	473.891	878.067	803.794	382.942	520.711	637.145	499.985
YDR182W	3768	3227	4959	5157	3888	3702	5020	4735								YDR182W	4124.34	1901.37	6101.13	5601.78	3642.84	5259.27	5486.34	4883.46								YDR182W	1476	1.476	2794.27	1288.19	4133.56	3795.24	2468.05	3563.19	3717.03	3308.58
YDR182W-A	28	40	37	26	42	41	40	31								YDR182W-A	30.648	23.5682	45.5217	28.2425	39.3516	58.2469	43.7158	31.9719								YDR182W-A	204	0.204	150.235	115.531	223.145	138.443	192.9	285.524	214.293	156.725
YDR183W	568	1187	946	981	597	557	720	684								YDR183W	621.716	699.387	1163.88	1065.61	559.355	791.306	786.885	705.446								YDR183W	693	0.693	897.137	1009.22	1679.48	1537.68	807.151	1141.86	1135.48	1017.96
YDR183C-A	372	788	496	520	409	439	600	558								YDR183C-A	407.18	464.294	610.236	564.849	383.21	623.668	655.738	575.495								YDR183C-A	258	0.258	1578.22	1799.59	2365.26	2189.34	1485.31	2417.32	2541.62	2230.6
YDR184C	1320	2873	2010	2319	1618	1628	2229	2061								YDR184C	1444.83	1692.79	2472.93	2519.01	1515.97	2312.83	2436.07	2125.62								YDR184C	885	0.885	1632.58	1912.75	2794.27	2846.34	1712.97	2613.37	2752.62	2401.83
YDR185C	206	402	404	410	181	164	276	212								YDR185C	225.482	236.861	497.047	445.362	169.587	232.988	301.639	218.647								YDR185C	540	0.54	417.559	438.631	920.458	824.744	314.05	431.459	558.591	404.902
YDR186C	4508	2998	8038	8919	4662	4851	7069	6329								YDR186C	4934.33	1766.44	9889.27	9688.25	4368.03	6891.6	7725.68	6527.43								YDR186C	2634	2.634	1873.32	670.63	3754.47	3678.15	1658.33	2616.4	2933.06	2478.15
YDR187C	2	4	10	6	1	3	3	1								YDR187C	2.18914	2.35682	12.3031	6.51749	0.936944	4.26197	3.27869	1.03135								YDR187C	519	0.519	4.218	4.54108	23.7055	12.5578	1.80529	8.21189	6.31732	1.98719
YDR188W	9230	9513	11106	11694	9849	8998	11636	11448								YDR188W	10102.9	5605.11	13663.9	12702.6	9227.96	12783.1	12716.9	11806.9								YDR188W	1641	1.641	6156.54	3415.67	8326.56	7740.76	5623.38	7789.8	7749.51	7194.96
YDR189W	5728	5860	7766	8263	5847	5863	8061	7355								YDR189W	6269.7	3452.75	9554.63	8975.67	5478.31	8329.31	8809.84	7585.6								YDR189W	2001	2.001	3133.28	1725.51	4774.93	4485.59	2737.79	4162.57	4402.72	3790.91
YDR190C	4497	6185	6800	7082	5965	5187	6926	6509								YDR190C	4922.29	3644.24	8366.14	7692.81	5588.87	7368.94	7569.4	6713.08								YDR190C	1392	1.392	3536.12	2617.99	6010.16	5526.44	4014.99	5293.78	5437.79	4822.61
YDR191W	315	342	703	674	329	256	390	282								YDR191W	344.79	201.508	864.911	732.131	308.254	363.688	426.23	290.842								YDR191W	1113	1.113	309.784	181.05	777.099	657.8	276.958	326.764	382.956	261.313
YDR192C	1367	1050	1677	1677	1200	1143	1531	1450								YDR192C	1496.28	618.666	2063.24	1821.64	1124.33	1623.81	1673.22	1495.46								YDR192C	1293	1.293	1157.21	478.473	1595.7	1408.85	869.553	1255.85	1294.06	1156.58
YDR193W	0	4	1	0	1	0	0	0								YDR193W	0	2.35682	1.23031	0	0.936944	0	0	0								YDR193W	399	0.399	0	5.90682	3.0835	0	2.34823	0	0	0
YDR194C	6697	13229	9390	9926	7343	7308	10760	9587								YDR194C	7330.34	7794.6	11552.7	10782.1	6879.98	10382.2	11759.6	9887.58								YDR194C	1995	1.995	3674.36	3907.07	5790.81	5404.56	3448.61	5204.09	5894.52	4956.18
YDR194W-A	1	0	0	1	0	0	0	0								YDR194W-A	1.09457	0	0	1.08625	0	0	0	0								YDR194W-A	153	0.153	7.15406	0	0	7.09966	0	0	0	0
YDR195W	1616	1644	2271	2400	1665	1847	2193	1961								YDR195W	1768.83	968.654	2794.05	2607	1560.01	2623.95	2396.72	2022.48								YDR195W	1602	1.602	1104.14	604.653	1744.1	1627.34	973.79	1637.92	1496.08	1262.47
YDR196C	397	613	748	685	440	388	487	492								YDR196C	434.545	361.183	920.276	744.08	412.255	551.215	532.24	507.426								YDR196C	726	0.726	598.546	497.497	1267.6	1024.9	567.845	759.249	733.114	698.934
YDR197W	951	1371	1776	1807	915	829	1231	1085								YDR197W	1040.94	807.801	2185.04	1962.85	857.303	1177.72	1345.36	1119.02								YDR197W	1170	1.17	889.69	690.428	1867.56	1677.65	732.738	1006.6	1149.88	956.426
YDR198C	758	903	880	1070	956	899	1086	1046								YDR198C	829.685	532.053	1082.68	1162.29	895.718	1277.17	1186.89	1078.8								YDR198C	1440	1.44	576.17	369.481	751.859	807.143	622.027	886.924	824.226	749.163
YDR199W	2	5	0	4	2	4	5	1								YDR199W	2.18914	2.94603	0	4.34499	1.87389	5.68263	5.46448	1.03135								YDR199W	366	0.366	5.98126	8.04926	0	11.8716	5.11991	15.5263	14.9303	2.8179
YDR200C	1404	1053	3174	3477	1550	1447	2348	1899								YDR200C	1536.78	620.434	3905.02	3776.88	1452.26	2055.69	2566.12	1958.54								YDR200C	1815	1.815	846.709	341.837	2151.53	2080.93	800.145	1132.61	1413.84	1079.09
YDR201W	221	397	290	331	229	179	260	296								YDR201W	241.9	233.915	356.791	359.548	214.56	254.297	284.153	305.281								YDR201W	498	0.498	485.743	469.708	716.448	721.984	430.844	510.638	570.588	613.013
YDR202C	740	1301	1340	1429	670	681	987	922								YDR202C	809.982	766.557	1648.62	1552.25	627.752	967.467	1078.69	950.908								YDR202C	1056	1.056	767.029	725.906	1561.2	1469.93	594.462	916.162	1021.49	900.481
YDR203W	4	5	3	5	10	5	5	5								YDR203W	4.37828	2.94603	3.69094	5.43124	9.36944	7.10328	5.46448	5.15677								YDR203W	318	0.318	13.7682	9.26424	11.6067	17.0794	29.4636	22.3374	17.1839	16.2162
YDR204W	1841	2154	2951	2912	1585	1376	2028	1938								YDR204W	2015.11	1269.15	3630.66	3163.15	1485.06	1954.82	2216.39	1998.76								YDR204W	1008	1.008	1999.11	1259.08	3601.84	3138.05	1473.27	1939.31	2198.8	1982.9
YDR205W	2015	1991	2733	2519	2225	2119	2771	2656								YDR205W	2205.56	1173.11	3362.45	2736.26	2084.7	3010.37	3028.42	2739.27								YDR205W	2175	2.175	1014.05	539.36	1545.95	1258.05	958.483	1384.08	1392.37	1259.44
YDR206W	3699	3074	3205	3435	4414	4253	5214	4895								YDR206W	4048.82	1811.22	3943.16	3731.26	4135.67	6042.05	5698.36	5048.47								YDR206W	2655	2.655	1524.98	682.192	1485.18	1405.37	1557.69	2275.73	2146.28	1901.5
YDR207C	2238	1461	3584	3785	2196	2353	3511	3105								YDR207C	2449.65	860.83	4409.45	4111.45	2057.53	3342.8	3837.16	3202.35								YDR207C	2511	2.511	975.567	342.823	1756.05	1637.38	819.406	1331.26	1528.14	1275.33
YDR208W	7263	6048	11332	12382	7607	6982	10419	9561								YDR208W	7949.87	3563.52	13941.9	13449.9	7127.33	9919.02	11386.9	9860.77								YDR208W	2340	2.34	3397.38	1522.87	5958.09	5747.83	3045.87	4238.9	4866.19	4214
YDR209C	2	1	1	1	1	2	0	2								YDR209C	2.18914	0.589206	1.23031	1.08625	0.936944	2.84131	0	2.06271								YDR209C	414	0.414	5.28778	1.4232	2.97178	2.62379	2.26315	6.86307	0	4.98238
YDR210W	2339	3507	1917	1962	2202	2120	2405	2104								YDR210W	2560.2	2066.34	2358.51	2131.22	2063.15	3011.79	2628.42	2169.97								YDR210W	228	0.228	11229	9062.91	10344.4	9347.45	9048.9	13209.6	11528.1	9517.4
YDR210W-B	5983	4231	17704	20828	9399	10658	19490	14397								YDR210W-B	6548.82	2492.93	21781.5	22624.4	8806.33	15141.4	21300.5	14848.4								YDR210W-B	5313	5.313	1232.6	469.213	4099.66	4258.31	1657.51	2849.87	4009.14	2794.73
YDR210W-A	0	0	0	0	0	0	0	0								YDR210W-A	0	0	0	0	0	0	0	0								YDR210W-A	1317	1.317	0	0	0	0	0	0	0	0
YDR210C-D	35873	17102	64055	73631	61235	67412	108086	86035								YDR210C-D	39265.5	10076.6	78807.8	79981.5	57373.7	95769.3	118127	88732.5								YDR210C-D	5268	5.268	7453.6	1912.79	14959.7	15182.5	10891	18179.4	22423.5	16843.7
YDR210C-C	0	0	0	0	0	0	0	0								YDR210C-C	0	0	0	0	0	0	0	0								YDR210C-C	1323	1.323	0	0	0	0	0	0	0	0
YDR211W	4842	8825	7258	7405	6146	5415	7558	7131								YDR211W	5299.91	5199.74	8929.63	8043.67	5758.46	7692.85	8260.11	7354.58								YDR211W	2139	2.139	2477.75	2430.92	4174.67	3760.48	2692.13	3596.47	3861.67	3438.33
YDR212W	9931	9996	12388	12366	10450	9489	12563	11873								YDR212W	10870.2	5889.7	15241.1	13432.5	9791.06	13480.6	13730.1	12245.3								YDR212W	1680	1.68	6470.35	3505.77	9072.11	7995.56	5828.01	8024.17	8172.65	7288.84
YDR213W	1044	493	2237	2380	1198	1001	1595	1350								YDR213W	1142.73	290.478	2752.21	2585.27	1122.46	1422.08	1743.17	1392.33								YDR213W	2742	2.742	416.751	105.937	1003.73	942.841	409.358	518.628	635.729	507.778
YDR214W	14117	13097	19140	18650	13982	11319	18013	16345								YDR214W	15452.1	7716.83	23548.2	20258.5	13100.3	16080.4	19686.3	16857.5								YDR214W	1053	1.053	14674.3	7328.42	22363	19238.9	12441	15271	18695.5	16009
YDR215C	2	2	32	20	1	2	7	1								YDR215C	2.18914	1.17841	39.3701	21.725	0.936944	2.84131	7.65027	1.03135								YDR215C	414	0.414	5.28778	2.8464	95.0968	52.4758	2.26315	6.86307	18.4789	2.49119
YDR216W	1188	568	10127	11332	1121	1039	2131	1643								YDR216W	1300.35	334.669	12459.4	12309.4	1050.31	1476.06	2328.96	1694.51								YDR216W	3972	3.972	327.379	84.257	3136.81	3099.03	264.429	371.617	586.345	426.615
YDR217C	884	1099	1403	1853	1255	1288	1654	1497								YDR217C	967.601	647.537	1726.13	2012.82	1175.86	1829.81	1807.65	1543.94								YDR217C	3930	3.93	246.209	164.768	439.219	512.167	299.202	465.599	459.962	392.859
YDR218C	8	16	10	21	15	3	16	9								YDR218C	8.75657	9.42729	12.3031	22.8112	14.0542	4.26197	17.4863	9.28218								YDR218C	1272	1.272	6.88409	7.41139	9.67229	17.9333	11.0489	3.3506	13.7471	7.29731
YDR219C	968	1146	2003	2256	1060	878	1378	1218								YDR219C	1059.54	675.23	2464.32	2450.58	993.16	1247.34	1506.01	1256.19								YDR219C	1398	1.398	757.9	482.997	1762.75	1752.92	710.415	892.229	1077.26	898.561
YDR220C	19	15	32	48	12	10	22	12								YDR220C	20.7968	8.83809	39.3701	52.1399	11.2433	14.2066	24.0437	12.3762								YDR220C	294	0.294	70.7376	30.0615	133.912	177.347	38.2426	48.3216	81.7813	42.096
YDR221W	2322	2082	2913	3304	2386	2186	3312	2668								YDR221W	2541.59	1226.73	3583.91	3588.96	2235.55	3105.55	3619.67	2751.65								YDR221W	2109	2.109	1205.12	581.663	1699.34	1701.74	1060	1472.52	1716.3	1304.72
YDR222W	986	1927	1557	1740	971	840	1478	1363								YDR222W	1079.25	1135.4	1915.6	1890.07	909.772	1193.35	1615.3	1405.73								YDR222W	1248	1.248	864.781	909.775	1534.94	1514.48	728.984	956.211	1294.31	1126.39
YDR223W	39	57	57	59	47	33	43	28								YDR223W	42.6883	33.5847	70.128	64.0886	44.0364	46.8817	46.9945	28.8779								YDR223W	1404	1.404	30.4047	23.9207	49.9487	45.6472	31.3649	33.3915	33.4719	20.5683
YDR224C	15563	31002	19426	18784	14931	13585	17083	15041								YDR224C	17034.8	18266.6	23900.1	20404.1	13989.5	19299.6	18669.9	15512.6								YDR224C	396	0.396	43017.2	46127.7	60353.8	51525.5	35327	48736.4	47146.3	39173.2
YDR225W	11992	20526	15558	14497	10876	9857	11545	10541								YDR225W	13126.1	12094	19141.2	15747.3	10190.2	14003.4	12617.5	10871.5								YDR225W	399	0.399	32897.5	30310.9	47973	39467	25539.3	35096.3	31622.8	27246.9
YDR226W	19465	28369	14929	15245	21038	18845	23690	22496								YDR226W	21305.8	16715.2	18367.4	16559.9	19711.4	26772.3	25890.7	23201.3								YDR226W	669	0.669	31847.3	24985.3	27455	24753.1	29464	40018.3	38700.6	34680.6
YDR227W	1663	1412	3323	3805	2002	2007	3225	2725								YDR227W	1820.27	831.959	4088.34	4133.17	1875.76	2851.26	3524.59	2810.44								YDR227W	4077	4.077	446.473	204.061	1002.78	1013.78	460.084	699.352	864.506	689.34
YDR228C	1855	1469	2819	3054	1887	1949	2871	2539								YDR228C	2030.43	865.543	3468.26	3317.4	1768.01	2768.86	3137.7	2618.61								YDR228C	1881	1.881	1079.44	460.151	1843.84	1763.64	939.932	1472.01	1668.1	1392.13
YDR229W	972	551	1792	1957	934	849	1323	1203								YDR229W	1063.92	324.652	2204.72	2125.79	875.105	1206.14	1445.9	1240.72								YDR229W	1362	1.362	781.148	238.364	1618.74	1560.78	642.515	885.563	1061.6	910.953
YDR230W	3	3	4	3	2	5	3	5								YDR230W	3.28371	1.76762	4.92126	3.25874	1.87389	7.10328	3.27869	5.15677								YDR230W	348	0.348	9.43596	5.07936	14.1416	9.36421	5.38473	20.4117	9.42152	14.8183
YDR231C	532	629	1227	1157	387	329	514	479								YDR231C	582.312	370.61	1509.6	1256.79	362.597	467.396	561.749	494.018								YDR231C	618	0.618	942.252	599.693	2442.71	2033.64	586.727	756.304	908.978	799.382
YDR232W	13188	15827	12651	12741	13207	13743	16893	15398								YDR232W	14435.2	9325.36	15564.7	13839.9	12374.2	19524.1	18462.3	15880.8								YDR232W	1647	1.647	8764.54	5662.03	9450.34	8403.09	7513.18	11854.3	11209.7	9642.24
YDR233C	33786	33694	33510	34289	36514	34844	43149	40986								YDR233C	36981.2	19852.7	41227.9	37246.4	34211.6	49501.3	47157.4	42271								YDR233C	888	0.888	41645.5	22356.6	46427.8	41944.1	38526.5	55744.8	53105.2	47602.5
YDR234W	9832	12087	9418	9470	12154	11286	13231	12664								YDR234W	10761.8	7121.73	11587.1	10286.8	11387.6	16033.5	14460.1	13061.1								YDR234W	2082	2.082	5168.98	3420.62	5565.37	4940.81	5469.56	7701.02	6945.3	6273.32
YDR235W	940	1968	1525	1647	1128	946	1333	1226								YDR235W	1028.9	1159.56	1876.23	1789.05	1056.87	1343.94	1456.83	1264.44								YDR235W	1635	1.635	629.295	709.209	1147.54	1094.22	646.405	821.982	891.028	773.357
YDR236C	689	1390	929	853	651	610	838	774								YDR236C	754.159	818.996	1142.96	926.57	609.95	866.6	915.847	798.267								YDR236C	657	0.657	1147.88	1246.57	1739.67	1410.3	928.387	1319.03	1393.98	1215.02
YDR237W	2549	4106	3400	3333	2196	2180	2823	2481								YDR237W	2790.06	2419.28	4183.07	3620.46	2057.53	3097.03	3085.25	2558.79								YDR237W	879	0.879	3174.13	2752.31	4758.9	4118.85	2340.76	3523.36	3509.95	2911.02
YDR238C	19440	19368	28029	30775	23677	21377	30936	27672								YDR238C	21278.5	11411.7	34484.5	33429.3	22184	30369.4	33809.8	28539.6								YDR238C	2922	2.922	7282.16	3905.45	11801.7	11440.5	7592.07	10393.4	11570.8	9767.15
YDR239C	1661	1207	2159	2245	1743	1749	2276	2069								YDR239C	1818.08	711.171	2656.25	2438.63	1633.09	2484.73	2487.43	2133.87								YDR239C	2364	2.364	769.07	300.834	1123.63	1031.57	690.818	1051.07	1052.21	902.652
YDR240C	919	1135	1517	1826	894	925	1336	1157								YDR240C	1005.91	668.749	1866.39	1983.49	837.628	1314.11	1460.11	1193.28								YDR240C	1479	1.479	680.129	452.163	1261.93	1341.1	566.347	888.511	987.227	806.812
YDR241W	47	96	43	58	34	35	57	61								YDR241W	51.4448	56.5638	52.9035	63.0024	31.8561	49.723	62.2951	62.9125								YDR241W	288	0.288	178.628	196.402	183.693	218.758	110.611	172.649	216.302	218.446
YDR242W	331	306	1032	1144	426	360	566	504								YDR242W	362.303	180.297	1269.69	1242.67	399.138	511.436	618.579	519.802								YDR242W	1650	1.65	219.578	109.271	769.506	753.132	241.902	309.961	374.897	315.032
YDR243C	540	609	653	640	568	543	703	628								YDR243C	591.068	358.826	803.396	695.199	532.184	771.416	768.306	647.69								YDR243C	1767	1.767	334.504	203.071	454.666	393.435	301.179	436.568	434.808	366.548
YDR244W	1166	1073	2042	2107	1172	1060	1556	1261								YDR244W	1276.27	632.218	2512.3	2288.72	1098.1	1505.9	1700.55	1300.54								YDR244W	1839	1.839	694.002	343.783	1366.12	1244.55	597.117	818.867	924.713	707.198
YDR245W	2993	2679	3709	3651	3205	3152	3959	3683								YDR245W	3276.05	1578.48	4563.24	3965.89	3002.9	4477.91	4326.78	3798.47								YDR245W	1182	1.182	2771.62	1335.43	3860.61	3355.24	2540.53	3788.42	3660.55	3213.6
YDR246W	1502	1261	2359	2470	1539	1354	1868	1687								YDR246W	1644.05	742.988	2902.31	2683.03	1441.96	1923.57	2041.53	1739.89								YDR246W	660	0.66	2490.98	1125.74	4397.44	4065.2	2184.78	2914.5	3093.23	2636.2
YDR246W-A	74	55	69	70	71	60	76	72								YDR246W-A	80.9982	32.4063	84.8917	76.0374	66.523	85.2394	83.0601	74.2574								YDR246W-A	201	0.201	402.976	161.225	422.347	378.295	330.96	424.077	413.234	369.44
YDR247W	1187	750	3115	3026	1025	1084	1591	1394								YDR247W	1299.26	441.904	3832.43	3286.99	960.367	1539.99	1738.8	1437.71								YDR247W	1386	1.386	937.414	318.834	2765.1	2371.56	692.906	1111.1	1254.54	1037.31
YDR248C	674	1373	1020	963	787	605	844	732								YDR248C	737.741	808.979	1254.92	1046.06	737.375	859.497	922.404	754.95								YDR248C	582	0.582	1267.6	1390	2156.22	1797.35	1266.97	1476.8	1584.89	1297.17
YDR249C	400	729	647	641	403	392	512	545								YDR249C	437.828	429.531	796.014	696.285	377.588	556.897	559.563	562.087								YDR249C	1122	1.122	390.221	382.826	709.46	620.575	336.531	496.343	498.719	500.969
YDR250C	2	11	7	4	4	3	3	2								YDR250C	2.18914	6.48126	8.6122	4.34499	3.74777	4.26197	3.27869	2.06271								YDR250C	276	0.276	7.93167	23.4828	31.2036	15.7427	13.5789	15.4419	11.8793	7.47357
YDR251W	5179	3592	10408	11259	5184	5167	8311	7122								YDR251W	5668.78	2116.43	12805.1	12230.1	4857.12	7340.53	9083.06	7345.3								YDR251W	2493	2.493	2273.88	848.948	5136.43	4905.76	1948.3	2944.46	3643.43	2946.37
YDR252W	208	267	303	264	200	170	209	217								YDR252W	227.671	157.318	372.785	286.769	187.389	241.512	228.415	223.804								YDR252W	450	0.45	505.935	349.595	828.412	637.266	416.419	536.692	507.59	497.341
YDR253C	88	159	147	135	99	61	104	103								YDR253C	96.3222	93.6837	180.856	146.643	92.7574	86.66	113.661	106.229								YDR253C	576	0.576	167.226	162.645	313.987	254.589	161.037	150.451	197.328	184.426
YDR254W	434	669	797	792	467	405	612	528								YDR254W	475.044	394.179	980.561	860.308	437.553	575.366	668.852	544.554								YDR254W	1377	1.377	344.985	286.259	712.1	624.77	317.758	417.84	485.732	395.464
[truncated: 4,810 more rows]

## Sheet: edc3_vs_wildtype_DESeq2_Results
	baseMean	log2FoldChange	lfcSE	stat	pvalue	padj	gene_id	gene_name	description
[truncated: 6,447 more rows]

## Sheet: scd6edc3_vs_wildtype_DESeq2_Res
	baseMean	log2FoldChange	lfcSE	stat	pvalue	padj	gene_id	gene_name	description
[truncated: 6,491 more rows]

[truncated: 1 more sheets: scd6_vs_wildtype_DESeq2_Results]
