# Supplementary material for: Decapping activators Edc3 and Scd6 act redundantly with Dhh1 in post-transcriptional repression of starvation-induced pathways
Source: eLife. 2025 Nov 25;13:RP102287. doi: 10.7554/eLife.102287 (PMC12646578; doi:10.7554/eLife.102287)
Supplement: Figure 6—figure supplement 1—source data 1. [file elife-102287-fig6-figsupp1-data1.xlsx]

## Sheet: Sheet1
(A)
(i) 591 Non-iESR mRNAs w/abundance repressed by Edc3/Scd6
Category
GO Biological process	p-Value	k	f
ATP synthesis coupled proton transport [GO:0015986]	3.234e-07	10	17
mitochondrial electron transport, cytochrome c to oxygen [GO:0006123]	1.372e-06	8	12
cristae formation [GO:0042407]	5.561e-06	5	5
ATP biosynthetic process [GO:0006754]	6.56e-06	12	31
cellular cell wall organization [GO:0007047]	7.218e-06	22	89
GO Cellular component
mitochondrial inner membrane [GO:0005743]	5.858e-09	45	204
mitochondrion [GO:0005739]	2.604e-08	145	1072
mitochondrial respiratory chain complex IV [GO:0005751]	5.809e-08	9	12
fungal-type cell wall [GO:0009277]	3.19e-06	22	85
MIPS Functional Classification
electron transport and membrane-associated energy conservation [02.11]	<1e-14	34	58
electron transport [20.01.15]	2.02e-10	28	83
aerobic respiration [02.13.03]	4.748e-09	25	77
energy generation (e.g. ATP synthase) [02.45.15]	3.157e-08	12	21
respiration [02.13]	8.953e-06	17	59
(ii) 212 mRNAs translationaly repressed by Edc3/Scd6
GO Biological process
asparagine catabolic process [GO:0006530]	5.038e-06	4	5
cellular aldehyde metabolic process [GO:0006081]	1.284e-05	5	11
GO Cellular component
cell wall [GO:0005618]	8.85e-06	11	68
extracellular region [GO:0005576]	9.094e-06	13	95
ribosome [GO:0005840]	1.696e-05	25	310
MIPS Functional Classification
degradation of asparagine [01.01.06.02.02]	5.038e-06	4	5
fermentation [02.16]	6.922e-06	7	24
(B)
(i) 1018 Non-iESR mRNAs w/abundance repressed by Pat1/Dhh1
Category
GO Biological process	p-Value	k	f
tricarboxylic acid cycle [GO:0006099]	2.869e-08	18	30
mitochondrial respiratory chain complex IV assembly [GO:0033617]	4.025e-06	10	14
GO Cellular component
fungal-type cell wall [GO:0009277]	3.124e-08	34	85
cell wall [GO:0005618]	9.816e-07	27	68
extracellular region [GO:0005576]	2.289e-06	33	95
mitochondrion [GO:0005739]	4.809e-06	215	1072
mitochondrial inner membrane [GO:0005743]	1.197e-05	55	204
plasma membrane [GO:0005886]	1.933e-05	83	350
MIPS Functional Classification
tricarboxylic-acid pathway (citrate cycle, Krebs cycle, TCA cycle) [02.10]	5.861e-08	18	31
electron transport and membrane-associated energy conservation [02.11]	3.896e-07	25	58
aerobic respiration [02.13.03]	1.433e-06	29	77
(ii) 274 mRNAs translationaly repressed by Pat1/Dhh1
GO Molecular Function
sequence-specific DNA binding [GO:0043565]	3.853e-06	21	165
GO Biological process
cellular aldehyde metabolic process [GO:0006081]	1.875e-06	6	11
allantoin catabolic process [GO:0000256]	2.328e-06	5	7
transmembrane transport [GO:0055085]	6.783e-06	30	303
flocculation [GO:0000128]	1.404e-05	4	5
GO Cellular component
cell wall [GO:0005618]	3.288e-06	13	68
extracellular region [GO:0005576]	7.034e-06	15	95
plasma membrane [GO:0005886]	4.407e-05	31	350
MIPS Functional Classification
C-compound and carbohydrate metabolism [01.05]	4.178e-07	27	223
fermentation [02.16]	3.271e-06	8	24
catabolism of nitrogenous compounds [01.02.02.09]	1.404e-05	4	5
metabolism of nonprotein amino acids [01.20.17.01]	2.519e-05	5	10
osmosensing and response [34.11.03.13]	7.027e-05	8	35
proton driven symporter [20.03.02.02.01]	7.071e-05	3	3
(C)
(i) 853 mRNAs with ribosome occupancy repressed by Edc3/Scd6
Category
GO Biological process	p-Value	k	f
response to stress [GO:0006950]	2.57e-11	51	152
thiamine biosynthetic process [GO:0009228]	9.281e-07	11	17
mitochondrial respiratory chain complex IV assembly [GO:0033617]	1.05e-05	9	14
glycogen biosynthetic process [GO:0005978]	2.303e-05	8	12
mitochondrial electron transport, cytochrome c to oxygen [GO:0006123]	2.303e-05	8	12
GO Cellular component
mitochondrion [GO:0005739]	2.814e-13	227	1072
mitochondrial inner membrane [GO:0005743]	1.387e-08	56	204
extracellular region [GO:0005576]	1.453e-05	28	95
mitochondrial intermembrane space [GO:0005758]	1.595e-05	16	40
plasma membrane enriched fraction [GO:0001950]	1.779e-05	26	86
mitochondrial respiratory chain complex IV [GO:0005751]	2.303e-05	8	12
cell wall [GO:0005618]	2.426e-05	22	68
fungal-type cell wall [GO:0009277]	4.31e-05	25	85
MIPS Functional Classification
electron transport and membrane-associated energy conservation [02.11]	1.243e-13	31	58
metabolism of energy reserves (e.g. glycogen, trehalose) [02.19]	1.81e-11	28	56
sugar, glucoside, polyol and carboxylate catabolism [01.05.02.07]	5.921e-11	34	81
stress response [32.01]	1.148e-09	50	162
aerobic respiration [02.13.03]	2.978e-08	29	77
electron transport [20.01.15]	2.009e-07	29	83
C-compound and carbohydrate metabolism [01.05]	3.82e-07	56	223
oxidative stress response [32.01.01]	4.143e-07	22	55
sugar, glucoside, polyol and carboxylate anabolism [01.05.02.04]	1.936e-06	16	35
oxidation of fatty acids [02.25]	1.668e-05	7	9
glutathione conjugation reaction [32.07.07.03]	3.561e-05	5	5
detoxification by modification [32.07.03]	0.0001015	6	8
(D)
(i) 1350 mRNAs with ribosome occupancy repressed by Pat1/Dhh1
Category
GO Biological process	p-Value	k	f
tricarboxylic acid cycle [GO:0006099]	6.144e-09	21	30
response to stress [GO:0006950]	4.059e-06	55	152
glycogen biosynthetic process [GO:0005978]	5.453e-06	10	12
cellular response to oxidative stress [GO:0034599]	1.772e-05	29	67
GO Cellular component
mitochondrion [GO:0005739]	3.75e-12	305	1072
fungal-type cell wall [GO:0009277]	5.622e-12	46	85
extracellular region [GO:0005576]	1.055e-08	44	95
cell wall [GO:0005618]	1.147e-08	35	68
plasma membrane [GO:0005886]	7.341e-05	101	350
MIPS Functional Classification
metabolism of energy reserves (e.g. glycogen, trehalose) [02.19]	8.144e-09	31	56
C-compound and carbohydrate metabolism [01.05]	1.753e-08	81	223
oxidative stress response [32.01.01]	1.049e-07	29	55
tricarboxylic-acid pathway (citrate cycle, Krebs cycle, TCA cycle) [02.10]	7.922e-07	19	31
stress response [32.01]	1.422e-06	59	162
electron transport and membrane-associated energy conservation [02.11]	1.815e-06	28	58
aerobic respiration [02.13.03]	6.142e-06	33	77
metabolism of vitamins, cofactors, and prosthetic groups [01.07]	7.043e-06	22	43
sugar, glucoside, polyol and carboxylate catabolism [01.05.02.07]	7.746e-06	34	81
osmotic and salt stress response [32.01.03]	3.273e-05	26
