# Supplementary material for: Decapping activators Edc3 and Scd6 act redundantly with Dhh1 in post-transcriptional repression of starvation-induced pathways
Source: eLife. 2025 Nov 25;13:RP102287. doi: 10.7554/eLife.102287 (PMC12646578; doi:10.7554/eLife.102287)
Supplement: Figure 6—figure supplement 3—source data 1. [file elife-102287-fig6-figsupp3-data1.xlsx]

## Sheet: Sheet1
		log2∆mRNA		log2∆mRNA		log2∆mRNA
Gene id	Gene	(scd6∆/WT)	FDR	(edc3∆/WT)	FDR	(scd6∆edc3∆/WT)	FDR	Targeted by
YGL222C	EDC1	0.415788	4.48e-05	0.316769	0.25714	1.9841	1.86e-155	Dhh1
YGL056C	SDS23	0.0509377	0.764889	-0.201352	0.530103	0.472036	8.08e-10	Dhh1
YDR343C	HXT6	0.328862	0.422678	0.683204	0.0359181	2.59316	4.2e-28	Dhh1/Pat1
YFL014W	HSP12	0.731412	0.0332637	0.885067	0.11564	6.8474	0	Dhh1/Pat1
