# Supplementary material for: Decapping activators Edc3 and Scd6 act redundantly with Dhh1 in post-transcriptional repression of starvation-induced pathways
Source: eLife. 2025 Nov 25;13:RP102287. doi: 10.7554/eLife.102287 (PMC12646578; doi:10.7554/eLife.102287)
Supplement: Figure 6—source data 1. — Sheet ‘Figure 6B–C Western analysis’ lists averages of band intensities normalized to the loading control (Gcd6) on the same blots and the corresponding S.E.M. values calculated from the replicates for each protein analyzed in Figure 6B–C. Sheet ‘Figure 6D Western analysis’ lists the Cox2 band intensities normalized to total stained proteins and the ratios of normalized Cox2 for each mutant vs. WT. Sheet ‘Figure 6F’ lists the specific activities of β-galactosidase determined from three biological replicates of each strain harboring the CYC1-lacZ reporter analyzed in Figure 6F. Sheet ‘Figure 6—figure supplement 2C’ lists the specific activities of β-galactosidase determined from three biological replicates of each strain harboring the ADH2-lacZ reporter analyzed in Figure 6—figure supplement 2C. [file elife-102287-fig6-data1.xlsx]

## Sheet: Fig. 6B-C Western analysis
Source data for Figures 6B-C
Protein	Protein Band Intensity normalized to loading control in WT			Protein Band Intensity normalized to loading control in scd6∆edc3∆			Ratio of Normalized Protein Band Intensity (scd6∆edc3∆/WT)
	AVG.	# replicates (n)	S.E.M.	AVG.	# replicates (n)	S.E.M.	Ratio	S.E.M. of ratio	P value
Cyb2	0.530676	2	0.0200258	1.48976	2	0.167418	2.80729	0.266037	0.0006
Cit2	0.626328	2	0.0411208	1.25998	2	0.111915	2.01169	0.189988	0.0009
Idh1	0.374284	2	0.0415276	0.831822	2	0.0880553	2.22244	0.269859	0.0016
Pet10	0.525994	2	0.0262162	1.12909	2	0.04095	2.14658	0.121826	0.0001
Cox20	0.548009	2	0.047725	1.33691	2	0.113945	2.43958	0.257721	0.0003
Sdh4	0.455125	2	0.0646816	0.685105	2	0.19802	1.50531	0.321585	0.2495
Atp20	0.680027	2	0.0771488	1.17519	2	0.105456	1.72815	0.212863	0.0047
Qcr8	0.324829	2	0.0661161	0.948343	2	0.215086	2.91951	0.650177	0.0186
Cox14	0.600811	2	0.0631084	0.981627	2	0.139733	1.63384	0.237574	0.0285
# replicates (n) = biological replicates

## Sheet: Fig. 6D Western analysis
Figure 6D source data
Rep 1	Cox2 intensity			Loading control intensity			Cox2/Total protein		Mutant/WT Normalized Cox2
		Area			Area
WT	1	7971.35		1	40856.8		0.195105		0.999998
scd6∆edc3∆	2	19657.1		2	39596.4		0.496436		2.54445
dhh1∆	3	20705.3		3	39103.1		0.529506		2.71395
pat1∆	4	14706.8		4	40577.8		0.362435		1.85764
dcp2∆	5	11946.8		5	40140.3		0.297627		1.52547
pat1∆dhh1∆	6	22976		6	38616.6		0.594977		3.04952
Rep 2	Cox2 intensity			Loading control intensity			Cox2/Total protein		Mutant/WT Normalized Cox2
		Area			Area
WT	1	7526.81		1	45176.3		0.16661		0.999999
scd6∆edc3∆	2	19312.7		2	44312.5		0.43583		2.61587
dhh1∆	3	12620.4		3	44351.2		0.284557		1.70792
pat1∆	4	12359.1		4	47773.1		0.258704		1.55275
dcp2∆	5	7194.67		5	50016.1		0.143847		0.863376
pat1∆dhh1∆	6	24796.2		6	46261.5		0.536001		3.2171
Rep 3	Cox2 intensity			Loading control intensity			Cox2/Total protein		Mutant/WT Normalized Cox2
		Area			Area
WT	1	8369.35		1	37904.2		0.220803		0.999999
edc3scd6	2	14564.4		2	36413.9		0.399969		1.81143
dhh1	3	14076.5		3	33149.3		0.42464		1.92316
pat1	4	11500		4	36295.9		0.316842		1.43495
dcp2	5	9271.15		5	33722.1		0.274928		1.24513
pat1dhh1	6	23973.2		6	33592.1		0.713655		3.23209

## Sheet: Figure 6F
Figure 6F source data
				CYC1-lacZ expression
	nanomoles of o-nitrophenyl-β-D-galactopyranoside [ONPG] cleaved per minute per milligram of total protein
	WT			edc3∆			scd6∆			scd6∆edc3∆			WT_Gly-EtOH			edc3∆ normalized with WT			scd6∆ normalized with WT			scd6∆edc3∆ normalized with WT			WT_Gly-EtOH normalized with WT_Glucose
	Value	Average	SEM	Value	Average	SEM	Value	Average	SEM	Value	Average	SEM	Value	Average	SEM	Value	Average	SEM	Value	Average	SEM	Value	Average	SEM	Value	Average	SEM
Replicate_1	0.116856	0.132032	0.010836	0.13081	0.114928	0.00867535	0.132027	0.154918	0.0114455	0.112264	0.108392	0.00478509	0.542079	0.54676	0.0506243	1.11942	0.891527	0.132742	1.12984	1.1783	0.0704529	0.960707	0.829767	0.066388	4.63888	4.15202	0.283678
Replicate_2	0.126223			0.113036			0.16625			0.0988769			0.461511			0.895525			1.31711			0.783351			3.65631
Replicate_3	0.153019			0.100937			0.166476			0.114036			0.636691			0.659638			1.08795			0.745242			4.16087

## Sheet: Figure 6-Fig sup 2C
Figure 6-figure supp 2C source data
				ADH2-lacZ expression
	nanomoles of o-nitrophenyl-β-D-galactopyranoside [ONPG] cleaved per minute per milligram of total protein
	WT			edc3∆			scd6∆			scd6∆edc3∆			WT_Gly-EtOH			edc3∆ normalized with WT			scd6∆ normalized with WT			scd6∆edc3∆ normalized with WT			WT_Gly-EtOH normalized with WT_Glucose
	Value	Average	SEM	Value	Average	SEM	Value	Average	SEM	Value	Average	SEM	Value	Average	SEM	Value	Average	SEM	Value	Average	SEM	Value	Average	SEM	Value	Average	SEM
Replicate_1	0.00921373	0.00934157	0.000189651	0.00830864	0.00857694	0.000306045	0.00909693	0.00885676	0.000250886	0.00275288	0.00253633	0.000123174	0.574821	0.534669	0.0254626	0.901767	0.919816	0.0477401	0.987323	0.949929	0.0451521	0.29878	0.271644	0.0136343	62.3874	57.2467	2.6458
Replicate_2	0.00971476			0.00823465			0.00835514			0.00252977			0.541722			0.847644			0.860046			0.260405			55.7628
Replicate_3	0.00909623			0.00918754			0.00911822			0.00232634			0.487466			1.01004			1.00242			0.255748			53.5898
