# Supplementary material for: Decapping activators Edc3 and Scd6 act redundantly with Dhh1 in post-transcriptional repression of starvation-induced pathways
Source: eLife. 2025 Nov 25;13:RP102287. doi: 10.7554/eLife.102287 (PMC12646578; doi:10.7554/eLife.102287)
Supplement: Figure 7—source data 1. — Sheets 1–4 list the statistical analyses of changes in metabolite concentrations in four biological replicates of the indicated four mutants vs. the wild-type (WT) determined in parallel for all 20 samples of metabolite extracts. Sheet 5 summarizes the log2 fold changes in metabolite levels and corresponding p-values for all 147 metabolites detected in for each of the four mutants. Sheet 6 lists the 46 metabolites up-regulated in any two of the four mutants (analyzed in Figure 7C), TCA cycle intermediates, and amino acids. Sheet 7 lists 93 amino acid biosynthetic genes interrogated in Figure 8D. [file elife-102287-fig7-data1.xlsx]

## Sheet: WT vs. pat1
	Skeleton_Metabolite	Metabolite	Formula	Ion Type	RT Start (min)	RT End (min)	m/z Tolerance (ppm)	RT Tolerance (min)	mz	obs_mz	ppm	winner	RT	RT_min	RT_max	RT_range	WT1	WT2	WT3	WT4	PT1	PT2	PT3	PT4	Blank_0	Blank_1	Blank_2	Blank_3	Blank_4	Blank_5	Blank_6	Blank_7	ttest_pval	1/pvalue	Control_Mean	Treatment_pat1_Mean	Log2FoldChange (WT/pat1)	LogFoldChange	blank_threshold	combined_mean	impact_score	Detection
2	3-Hydroxybutyric acid	3 3-Hydroxybutyric acid	C4H8O3	[M-H]-	5.7	7.7	15	0.2	103.04	103.038	-15.2	S21008	5.81	5.71	5.9	0.18	37738	37738	37738	37738	37738	37738	37738	37738	10687	9027	7931	7947	9384	8121	10526	10345	NA	NA	37738	37738	0	1	37738	37738	0	0
38	Cytosine	39 Cytosine	C4H5N3O	[M+H]+	9	11	15	0.2	112.05	112.051	0.5	S21008	9.52	9.28	9.75	0.47	256205	256205	256205	256205	256205	256205	256205	256205	86105	86397	82881	79058	80082	73147	78192	90684	NA	NA	256205	256205	0	1	256205	256205	0	0
42	Dihydrofolic acid	43 Dihydrofolic acid	C19H21N7O6	[M+H]+	13	16	15	0.2	444.163	444.161	-3.2	S21006	15.9	15.68	15.9	0.22	16054.8	16054.8	16054.8	16054.8	16054.8	16054.8	16054.8	16054.8	0	5131	0	3233	0	2977	4805	0	NA	NA	16054.8	16054.8	0	1	16054.8	16054.8	0	0
62	Homocysteine	63 Homocysteine	C4H9NO2S	[M-H]-	7.3	9.3	15	0.2	134.028	134.027	-11.4	S21016	8.5	8.32	8.52	0.2	10000	10000	10000	10000	10000	10000	10000	10000	0	0	0	0	0	0	0	0	NA	NA	10000	10000	0	1	10000	10000	0	0
75	L-Cystine	76 L-Cystine	C6H12N2O4S2	[M-H]-	11.7	13.7	15	0.2	239.017	239.015	-4.9	SQ989_Blank_5	12.94	12.69	13	0.31	20905	20905	20905	20905	20905	20905	20905	20905	5037	0	5212	4215	0	6719	3348	4549	NA	NA	20905	20905	0	1	20905	20905	0	0
104	NADPH	105 NADPH	C21H30N7O17P3	[M-H]-	13	15	15	0.2	744.084	744.085	2	S21011	14.46	14.3	14.6	0.3	10000	10000	10000	10000	10000	10000	10000	10000	0	0	0	0	0	0	0	0	NA	NA	10000	10000	0	1	10000	10000	0	0
105	Niacinamide	106 Niacinamide	C6H6N2O	[M+H]+	3.3	5.3	15	0.2	123.055	123.055	0.1	SQ989_Blank_4	4.42	4.36	4.45	0.08	1.07034e+07	1.07034e+07	1.07034e+07	1.07034e+07	1.07034e+07	1.07034e+07	1.07034e+07	1.07034e+07	3671734	2947974	3893300	3335005	4257630	3291484	3803460	3315160	NA	NA	1.07034e+07	1.07034e+07	0	1	1.07034e+07	1.07034e+07	0	0
110	Orotidylic acid	111 Orotidylic acid	C10H13N2O11P	[M+H]+	0	30	15	0.2	369.033	369.036	7.1	S21008	11.11	11.11	11.11	0	10000	10000	10000	10000	10000	10000	10000	10000	0	0	0	0	0	0	0	0	NA	NA	10000	10000	0	1	10000	10000	0	0
112	Oxoadipic acid	113 Oxoadipic acid	C6H8O5	[M-H]-	7.5	9.5	15	0.2	159.03	159.029	-5	S21015	7.7	7.58	7.94	0.37	22166.9	22166.9	22166.9	22166.9	22166.9	22166.9	22166.9	22166.9	5565	4482	3404	4246	3046	2587	3224	5891	NA	NA	22166.9	22166.9	0	1	22166.9	22166.9	0	0
116	Phenol	117 Phenol	C6H6O	[M-H]-	2.1	4.1	15	0.2	93.0346	93.0334	-12.8	SQ989_Blank_5	3.17	3.14	3.2	0.06	1.71891e+07	1.71891e+07	1.71891e+07	1.71891e+07	1.71891e+07	1.71891e+07	1.71891e+07	1.71891e+07	5772696	5596890	5698050	5676446	5929918	5950799	5532058	5654062	NA	NA	1.71891e+07	1.71891e+07	0	1	1.71891e+07	1.71891e+07	0	0
117	Phosphocreatine	118 Phosphocreatine	C4H10N3O5P	[M-H]-	11.2	13.2	15	0.2	210.029	210.03	6	S21013	12.65	12.55	12.65	0.1	10000	10000	10000	10000	10000	10000	10000	10000	0	0	0	0	0	0	0	0	NA	NA	10000	10000	0	1	10000	10000	0	0
119	Phosphoribosyl pyrophosphate	120 Phosphoribosyl pyrophosphate	C5H13O14P3	[M-H]-	15	18	15	0.2	388.945	388.941	-10.1	S21007	15.32	15.32	15.57	0.25	10863.6	10863.6	10863.6	10863.6	10863.6	10863.6	10863.6	10863.6	0	0	0	2303	0	0	0	0	NA	NA	10863.6	10863.6	0	1	10863.6	10863.6	0	0
121	Phosphoserine	122 Phosphoserine	C3H8NO6P	[M+H]+	11.5	13.5	15	0.2	186.016	186.016	0.5	S21018	11.82	11.57	12	0.44	38525.1	38525.1	38525.1	38525.1	38525.1	38525.1	38525.1	38525.1	10437	6328	11603	7173	14870	7208	18448	0	NA	NA	38525.1	38525.1	0	1	38525.1	38525.1	0	0
136	Uric acid	137 Uric acid	C5H4N4O3	[M+H]+	8.8	10.8	15	0.2	169.036	169.037	8.8	S21012	10.01	10.01	10.01	0	10000	10000	10000	10000	10000	10000	10000	10000	0	0	0	0	0	0	0	0	NA	NA	10000	10000	0	1	10000	10000	0	0
145	Xanthosine	146 Xanthosine	C10H12N4O6	[M-H]-	6.7	8.7	15	0.2	283.068	283.066	-8.5	S21009	7.44	7.44	7.47	0.03	10000	10000	10000	10000	10000	10000	10000	10000	0	0	0	0	0	0	0	0	NA	NA	10000	10000	0	1	10000	10000	0	0
90	L-Tryptophan	91 L-Tryptophan	C11H12N2O2	[M+H]+	6.8	8.8	15	0.2	205.097	205.097	-1.7	S21013	8.13	8.08	8.19	0.11	19016468	14570385	15284980	16807384	87188704	83950152	82542224	80647736	122046	97306	141409	117412	158508	104472	149194	99368	1.72066e-08	5.81172e+07	1.64198e+07	83582204	-2.34776	0.196451	381143	5.0001e+07	14792076163	8
79	L-Isoleucine	80 L-Isoleucine	C6H13NO2	[M+H]+	6	7.5	15	0.2	132.102	132.102	-1.6	S21014	7.38	7.33	7.41	0.08	218774416	182620304	178196272	189743792	534047008	553549824	532155520	525898464	1178276	916923	1277192	870757	1309576	946878	1410010	986914	6.74727e-08	1.48208e+07	192333696	536412704	-1.47973	0.358555	3.3462e+06	364373200	15061290814	8
91	L-Tyrosine	92 L-Tyrosine	C9H11NO3	[M+H]+	8.2	10.2	15	0.2	182.081	182.081	-1.5	S21013	9.47	9.4	9.52	0.12	77650496	71396976	65917808	71663760	253590992	252037072	231379440	235276320	1200096	593354	1266230	660915	1540388	675272	1556278	741804	1.44425e-07	6.92399e+06	71657260	243070956	-1.76219	0.2948	3.09788e+06	157364108	3696023888	8
68	L-Alanine	69 L-Alanine	C3H7NO2	[M+H]+	10.6	11.2	15	0.2	90.055	90.0553	3.8	S21013	11.06	11.03	11.09	0.06	81039768	69166024	66069772	69489224	183824448	175288160	175418496	180956928	1947715	837478	2501886	843669	2410774	807253	2155295	920619	1.54057e-07	6.49109e+06	71441197	178872008	-1.3241	0.399398	4.66926e+06	1.25157e+08	2034065671	8
92	L-Valine	93 L-Valine	C5H11NO2	[M+H]+	8.3	9.2	15	0.2	118.086	118.086	0.4	S21013	8.96	8.89	8.97	0.07	187044240	174902496	156845088	175814688	421765376	413393568	389791744	407341056	1725438	1004749	1839931	1019150	1868688	1089140	1849842	1031537	2.42809e-07	4.11847e+06	173651628	408072936	-1.23263	0.425541	4.29568e+06	290862282	2815025025	8
86	L-Phenylalanine	87 L-Phenylalanine	C9H11NO2	[M+H]+	5.6	7.6	15	0.2	166.086	166.086	-1.5	S21015	6.81	6.76	6.86	0.1	299060416	254319392	242790944	272902592	743835008	755375424	773896000	689132416	1109886	836541	1188137	878140	1230040	943485	1301431	981271	6.54078e-07	1.52887e+06	267268336	740559712	-1.47033	0.3609	3.18585e+06	503914024	2134712050	8
77	L-Glutamine	78 L-Glutamine	C5H10N2O3	[M+H]+	10.1	12.1	15	0.2	147.076	147.076	-2.2	S21013	11.4	11.35	11.47	0.12	559668864	504041248	500403552	506203264	977814464	918233536	927686400	911289344	30092348	683117	44805924	1354054	38158496	1259683	30336682	1421964	9.61335e-07	1.04022e+06	517579232	933755936	-0.851266	0.554298	5.55521e+07	725667584	1361819911	8
95	N-Acetylglutamine	96 N-Acetylglutamine	C7H12N2O4	[M-H]-	6.8	8.8	15	0.2	187.072	187.072	-4.4	S21014	7.9	7.73	8.08	0.34	3987010	3628364	2672238	3153185	17250644	17705186	14973162	17290252	4318	2676	4428	4706	2986	2742	3508	4128	1.10442e-06	905453	3.3602e+06	16804811	-2.32226	0.199955	21059.5	1.00825e+07	45656522	8
139	Uridine 5'-monophosphate	140 Uridine 5'-monophosphate	C9H13N2O9P	[M-H]-	11.2	13.2	15	0.2	323.029	323.029	-0.3	S21001	12.21	12.19	12.29	0.11	32322396	29969974	31898226	31806634	13560607	14435247	16769496	15061006	210458	7052	186812	11871	244120	8337	415427	9418	1.24059e-06	806067	3.14993e+07	14956589	1.07454	2.10605	420061	2.32279e+07	39432146	8
98	N-Acetyl-L-phenylalanine	99 N-Acetyl-L-phenylalanine	C11H13NO3	[M+H]+	2.8	4	15	0.2	208.097	208.096	-1.5	S21015	3.28	3.21	3.3	0.08	1022736	1026952	968940	968940	2116540	2118410	2372990	2262108	332418	292556	305775	358326	302228	357741	297255	310874	1.35657e-06	737151	996892	2217512	-1.15343	0.449554	968940	1.6072e+06	2635389	6
88	L-Serine	89 L-Serine	C3H7NO3	[M+H]+	10.8	12.8	15	0.2	106.05	106.05	2.2	S21015	12.07	12.04	12.09	0.05	26455344	24079814	21725256	22584784	42621168	43011708	43758016	40265368	1532604	974497	1969294	899836	2014806	956194	1906231	1042765	6.48923e-06	154101	2.37113e+07	42414065	-0.838968	0.559043	4.24609e+06	3.30627e+07	9113793	8
82	L-Leucine	83 L-Leucine	C6H13NO2	[M+H]+	7.5	9	15	0.2	132.102	132.102	-1.6	S21013	7.45	7.45	7.7	0.25	151413088	106935592	134880608	136370080	488543328	482658144	444592896	397114720	742976	605004	919731	579753	1040047	654485	957289	665967	8.54044e-06	117090	132399842	453227272	-1.77533	0.292127	2.32197e+06	292813557	117365304	8
141	Uridine diphosphate-N-acetylglucosamine	142 Uridine diphosphate-N-acetylglucosamine	C17H27N3O17P2	[M+H]+	11.2	13.2	15	0.2	608.089	608.087	-2.7	S21014	12.27	12.17	12.31	0.14	942157	876146	677488	796083	2394021	2465777	2140030	2086999	14381	0	10845	0	18510	0	27998	0	1.13144e-05	88383.1	822968	2.27171e+06	-1.46487	0.362269	36900.2	1.54734e+06	377505	8
100	N-Acetylserine	101 N-Acetylserine	C5H9NO4	[M-H]-	7.5	8.5	15	0.2	146.046	146.045	-7.4	S21013	8.02	7.92	8.06	0.14	1620954	1288334	1213562	1269152	4619149	4333666	3607306	4231022	41696	42090	43900	39717	55249	37327	47637	38323	1.79166e-05	55814	1.348e+06	4.19779e+06	-1.63881	0.321122	139727	2.77289e+06	481955	8
129	Sarcosine	130 Sarcosine	C3H7NO2	[M+H]+	11.2	12	15	0.2	90.055	90.0554	4.9	S21014	11.22	11.2	11.23	0.03	22608042	25188824	17533270	17997138	50767256	60271208	57169216	52467000	318196	167575	538822	196853	529419	164960	349976	174893	2.00169e-05	49957.8	2.08318e+07	55168670	-1.40506	0.377602	925260	3.80002e+07	5027532	8
51	Fumaric acid	52 Fumaric acid	C4H4O4	[M-H]-	12.2	14.2	15	0.2	115.004	115.002	-11.2	S21006	13.17	13.17	13.31	0.14	8150326	7280081	6155558	7994624	13252388	12846946	12129983	13006421	499656	28718	127334	18410	73472	24826	55744	15976	4.33325e-05	23077.4	7.39515e+06	1.28089e+07	-0.7925	0.577343	326551	1.0102e+07	403796	8
140	Uridine diphosphate glucose	141 Uridine diphosphate glucose	C15H24N2O17P2	[M-H]-	12.4	14.4	15	0.2	565.048	565.048	-0.4	S21007	13.5	13.48	13.53	0.06	6847879	4943366	4498843	5236163	15189813	15064939	12544179	13101992	47846	0	60222	0	68526	0	197558	0	5.34395e-05	18712.7	5.38156e+06	1.39752e+07	-1.37678	0.385079	150307	9.6784e+06	470318	8
115	Pantothenic acid	116 Pantothenic acid	C9H17NO5	[M+H]+	5.1	7.1	15	0.2	220.118	220.118	-2	S21007	6.12	5.96	6.25	0.29	22466378	21727958	18822126	21692774	35165792	32220616	31266214	32338450	42492	26050	25209	18167	20757	25997	39248	16045	5.99959e-05	16667.8	21177309	32747768	-0.628877	0.646679	90236.9	2.69625e+07	694945	8
73	L-Cystathionine	74 L-Cystathionine	C7H14N2O4S	[M+H]+	12.2	14.2	15	0.2	223.075	223.074	-1.4	S21016	13.44	13.44	13.6	0.16	5747194	5536890	4986348	4516238	8427215	8274315	8164180	9007311	230414	10602	407845	40081	346000	30614	405386	34863	6.65216e-05	15032.7	5.19667e+06	8.46826e+06	-0.704478	0.613664	574677	6.83246e+06	167372	8
133	Uracil	134 Uracil	C4H4N2O2	[M+H]+	5.4	7.4	15	0.2	113.035	113.035	0.4	S21002	6.64	6.51	6.85	0.34	21467642	24317376	19072980	22527970	11455646	11295786	10210211	11554408	20280	10477	15406	14318	17684	18930	16862	9671	8.18223e-05	12221.6	21846492	1.1129e+07	0.973076	1.96302	56360.5	1.64878e+07	395562	8
80	L-Kynurenine	81 L-Kynurenine	C10H12N2O3	[M+H]+	6	8	15	0.2	209.092	209.091	-2.7	S21002	7.37	7.27	7.4	0.13	16761823	17676076	14708108	16886976	10806829	9871898	9934221	9159257	52930	30473	50235	29810	57993	38494	49057	37074	9.58897e-05	10428.7	1.65082e+07	9.94305e+06	0.731426	1.66028	139775	1.32256e+07	228995	8
55	Glycine	56 Glycine	C2H5NO2	[M+H]+	10.7	12.7	15	0.2	76.0393	76.0399	7.8	S21015	11.94	11.92	11.99	0.08	4454935	3835482	3919960	3984922	6350390	6013452	6878860	6008788	282418	142627	302614	161817	351987	145698	378217	148775	9.6007e-05	10415.9	4.04882e+06	6.31287e+06	-0.640793	0.64136	727807	5.18085e+06	84139	8
84	L-Malic acid	85 L-Malic acid	C4H6O5	[M-H]-	12.2	14.2	15	0.2	133.014	133.013	-9.4	S21006	13.17	13.16	13.25	0.09	89831560	82190320	66374648	89165104	140686768	138671296	128261040	135270608	7883238	1124152	3543334	718963	4242227	836038	2467080	497144	0.000117221	8530.91	81890408	135722428	-0.728893	0.603367	8002066	108806418	1538398	8
57	Guanine	58 Guanine	C5H5N5O	[M+H]+	7.7	9.7	15	0.2	152.057	152.056	-1.2	S21016	8.67	8.6	8.9	0.3	34319652	29645062	36574040	41075204	57702816	54636668	56691104	58237276	164034	47535	209126	50056	272436	57326	158621	56603	0.000141351	7074.58	3.54035e+07	56816966	-0.68243	0.623115	390901	4.61102e+07	523516	8
126	Saccharopine	127 Saccharopine	C11H20N2O6	[M-H]-	11	14	15	0.2	275.125	275.125	-0.2	S21006	12.61	12.42	12.64	0.23	3728403	4499850	3645748	4567421	10049803	9267308	7886796	10781826	50062	2200	73888	0	86877	0	190420	0	0.000191733	5215.58	4.11036e+06	9.49643e+06	-1.20812	0.432832	161293	6.80339e+06	81980	8
89	L-Threonine	90 L-Threonine	C4H9NO3	[M-H]-	9.5	11.5	15	0.2	118.051	118.05	-10.7	S21014	10.84	10.77	10.88	0.12	15979350	14401182	12157439	13880629	51864740	52688320	34747136	49715836	874314	198477	915581	232416	1038527	251586	998930	283930	0.000246143	4062.68	14104650	47254008	-1.74427	0.298486	1.80766e+06	30679329	417575	8
87	L-Proline	88 L-Proline	C5H9NO2	[M+H]+	7.9	9.9	15	0.2	116.071	116.071	0.8	S21009	9.22	9.18	9.24	0.07	486158720	504388448	466314528	507188672	626993728	585573760	573178688	605196928	7075474	5678172	7338664	5607189	8124797	5706298	7899396	6109093	0.000402168	2486.52	491012592	597735776	-0.283748	0.821454	2.00872e+07	544374184	1647809	8
29	cis-Aconitic acid	30 cis-Aconitic acid	C6H6O6	[M-H]-	14.1	16.1	15	0.2	173.009	173.008	-5.6	S21006	15.16	15.12	15.22	0.11	14539459	11723328	11588687	11503999	20739444	22356408	21472046	17971768	3099624	58699	2432993	42860	2335246	41749	2003900	41924	0.000450841	2218.07	1.23389e+07	2.06349e+07	-0.741878	0.597961	3.78137e+06	1.64869e+07	61156	8
85	L-Methionine	86 L-Methionine	C5H11NO2S	[M+H]+	6.8	8.8	15	0.2	150.058	150.058	-1.5	S21009	8.06	7.97	8.11	0.14	170829680	167599152	146296240	157925936	241400352	231767584	207987280	217170224	266568	64675	279574	82240	381054	83512	262339	99568	0.000458315	2181.91	160662752	224581360	-0.483203	0.715388	579824	192622056	587491	8
65	Inosine	66 Inosine	C10H12N4O5	[M+H]+	6.4	8.4	15	0.2	269.088	269.087	-3.1	S21019	7.59	7.5	7.69	0.19	44378672	42725448	40152280	43631900	34706076	34697372	31314336	35220640	80159	0	61710	6939	93731	0	74556	8292	0.000498795	2004.83	42722075	33984606	0.3301	1.2571	132020	3.83533e+07	96661	8
111	Oxidized glutathione	112 Oxidized glutathione	C20H32N6O12S2	[M+H]+	13.5	15.5	15	0.2	613.159	613.158	-2.4	S21014	14.63	14.63	14.73	0.1	7982562	8208834	8312048	8200242	9405874	9895042	9037476	9512174	250303	35124	532200	122175	486176	162684	716315	228545	0.000499566	2001.74	8.17592e+06	9.46264e+06	-0.210862	0.864021	960071	8.81928e+06	20432	8
71	L-Aspartic acid	72 L-Aspartic acid	C4H7NO4	[M-H]-	10.8	12.8	15	0.2	132.03	132.029	-8.6	S21016	11.93	11.89	11.97	0.08	159893472	153973296	139081984	142682368	183347520	184849952	179033424	185386096	4493281	432247	4942630	531045	5041587	569639	6527054	580120	0.000504916	1980.53	148907780	183154248	-0.29864	0.813018	8.6791e+06	166031014	404454	8
122	Pipecolic acid	123 Pipecolic acid	C6H11NO2	[M+H]+	7.5	9.5	15	0.2	130.086	130.086	-1.2	S21008	8.8	8.72	8.86	0.15	9009073	7538573	7108717	8041346	12648691	12719075	11998370	10740395	109825	103956	139458	98499	135636	117080	144663	109914	0.00054543	1833.42	7.92443e+06	1.20266e+07	-0.601854	0.658907	369637	9975530	27757	8
4	4,5-Dihydroorotic acid	5 4,5-Dihydroorotic acid	C5H6N2O4	[M-H]-	7.5	9.5	15	0.2	157.025	157.025	-3.1	S21014	8.44	8.29	8.54	0.24	28792	20004	16371.6	18620	154190	160767	91709	115649	0	0	2752	2651	2638	3024	3294	2632	0.000572448	1746.88	20946.9	130579	-2.64011	0.160416	16371.6	75762.8	825	7
66	Inosinic acid	67 Inosinic acid	C10H13N4O8P	[M+H]+	11.4	13.4	15	0.2	349.054	349.053	-3.1	S21002	12.56	12.51	12.77	0.25	784255	1226088	764353	811644	181179	188713	188465	164431	14359	4217	14756	5757	21775	0	28592	3803	0.000639591	1563.5	896585	180697	2.31087	4.96181	44972.1	538641	4179	8
20	Aminoadipic acid	21 Aminoadipic acid	C6H11NO4	[M-H]-	5.9	7.9	15	0.2	160.061	160.06	-7.1	S21007	7.42	7.29	7.53	0.24	5444028	5806707	4568336	3921158	2181013	1662058	2335992	1720436	3884	5963	4253	5572	6878	7448	3555	6049	0.00065036	1537.61	4.93506e+06	1.97487e+06	1.32131	2.49892	26350.8	3454966	13275	8
138	Uridine 5'-diphosphate	139 Uridine 5'-diphosphate	C9H14N2O12P2	[M+H]+	12.4	14.4	15	0.2	405.01	405.008	-3.2	S21006	13.51	13.49	13.75	0.26	963471	873604	519419	655522	2188783	2333387	1606960	1800491	23810	3946	112978	16917	79384	16962	137474	21225	0.000770777	1297.39	753004	1.98241e+06	-1.39652	0.379844	164761	1.3677e+06	4672	8
44	D-Ribose 5-phosphate	45 D-Ribose 5-phosphate	C5H11O8P	[M-H]-	12.4	13.8	15	0.2	229.012	229.011	-2.1	S21006	12.74	12.69	12.98	0.28	6679558	6511872	6490988	7202386	4528554	5021988	5255618	5642060	112365	2790	159821	8509	337655	7293	300434	10312	0.00134298	744.611	6721201	5112055	0.394816	1.31477	362192	5916628	5792	8
144	Xanthine	145 Xanthine	C5H4N4O2	[M-H]-	7.5	9.4	15	0.2	151.026	151.025	-6.9	S21006	8.45	8.36	8.52	0.16	4638042	3904127	4285875	4666156	8018052	7729392	7041862	10115475	23770	17146	20267	15845	20889	16680	22823	15782	0.00135973	735.442	4373550	8.2262e+06	-0.911421	0.531661	67450.8	6.29987e+06	8715	8
31	Citrulline	32 Citrulline	C6H13N3O3	[M+H]+	10.9	12.9	15	0.2	176.103	176.103	-1.5	S21001	12.2	12.17	12.23	0.06	123621472	115319920	112174616	112477840	95594168	96970960	92211424	102944056	2461791	1123530	2640908	1159458	3978051	1391586	3582516	1425102	0.00159877	625.479	115898462	96930152	0.257844	1.19569	6.6711e+06	106414307	79585	8
134	Ureidopropionic acid	135 Ureidopropionic acid	C4H8N2O3	[M-H]-	10.4	12.4	15	0.2	131.046	131.045	-9.3	S21009	11.63	11.53	11.63	0.1	4395074	3283495	3470244	3225844	8683949	10238519	10731731	6346978	157169	14483	236837	17367	227449	23955	235692	25778	0.00185687	538.54	3.59366e+06	9.00029e+06	-1.32452	0.399283	362024	6.29698e+06	8493	8
39	D-2-Hydroxyglutaric acid	40 D-2-Hydroxyglutaric acid	C5H8O5	[M-H]-	11.6	13.6	15	0.2	147.03	147.029	-6.8	S21007	12.43	12.35	12.44	0.09	3096292	4602463	3927273	4671038	7172008	7138212	8944817	6520208	125172	50664	81566	44673	82040	61818	110623	59284	0.00186459	536.311	4.07427e+06	7.44381e+06	-0.869501	0.547336	240940	5.75904e+06	5643	8
108	Ornithine	109 Ornithine	C5H12N2O2	[M+H]+	17	19	15	0.2	133.097	133.097	-1.2	S21006	17.59	17.54	17.78	0.24	42865640	44555364	40115024	47977420	53527616	59115548	52851828	54609960	9525285	1227486	13375504	2601702	15679397	2744050	21367018	3753625	0.00212385	470.843	43878362	55026238	-0.32661	0.797408	2.63628e+07	49452300	29200	8
30	Citric acid	31 Citric acid	C6H8O7	[M-H]-	14.2	16.2	15	0.2	191.02	191.019	-3.8	S21008	15.34	15.22	15.58	0.36	135032592	125427984	134264256	111514384	211554000	232705968	251380864	171324368	3288378	230298	41312368	1120421	48277864	1181936	61168332	1906587	0.00245151	407.911	126559804	216741300	-0.776155	0.583921	59442319	171650552	119910	8
7	5-Phosphoribosylamine	8 5-Phosphoribosylamine	C5H12NO7P	[M-H]-	11.5	13.5	15	0.2	228.028	228.026	-7.7	S21002	12.83	12.59	13.03	0.44	39793	43645	35558	33183	19280.1	25100	27763	19280.1	0	0	3778	0	12334	1941	5013	1681	0.00292581	341.786	38044.8	22855.8	0.735136	1.66455	19280.1	30450.3	17	6
137	Uridine	138 Uridine	C9H12N2O6	[M-H]-	5.5	7.5	15	0.2	243.062	243.062	-1.9	S21001	6.67	6.59	6.79	0.2	39929036	38633720	29280460	34964468	24472556	24398234	21423442	24357748	14227	4031	12701	3219	8641	2787	6779	3565	0.00294732	339.292	35701921	23662995	0.593369	1.50877	30981.2	29682458	15195	8
72	L-Carnitine	73 L-Carnitine	C7H16NO3	[Cat]+	8.3	10.3	15	0.2	162.113	162.112	-1.7	S21016	9.7	9.67	9.72	0.06	395927296	463056576	348904224	411155552	541809920	542555840	523747008	621826368	415471	89678	456456	109360	674818	93909	686349	105283	0.00314542	317.923	404760912	557484784	-0.461862	0.726048	996746	481122848	210675	8
120	Phosphorylcholine	121 Phosphorylcholine	C5H14NO4P	[M+H]+	10	13	15	0.2	184.073	184.073	-1.8	S21007	11.71	11.64	11.74	0.1	111449728	91585432	82325976	100726568	149256624	152703232	147741136	119934496	3057545	61923	4142064	76165	3525888	59629	10642064	145813	0.00339003	294.983	96521926	142408872	-0.56111	0.67778	8.15166e+06	119465399	51994	8
130	Succinic acid	131 Succinic acid	C4H6O4	[M-H]-	11.3	13.3	15	0.2	117.019	117.018	-9.7	S21008	12.41	12.35	12.42	0.07	20613222	24922438	20783738	24491968	15647662	17091270	17964226	14947232	191065	124007	154186	157111	203069	151298	217012	113650	0.00343389	291.215	2.27028e+07	1.64126e+07	0.468069	1.38326	501774	1.95577e+07	7878	8
64	Hypoxanthine	65 Hypoxanthine	C5H4N4O	[M+H]+	5.8	7.8	15	0.2	137.046	137.046	-2.1	S21019	6.92	6.86	7	0.14	216144288	227251536	209111792	248242736	313054784	294919328	266477440	332695744	561440	129832	470799	139704	725246	156424	577781	150168	0.00349316	286.274	225187588	301786824	-0.422403	0.746181	1.10177e+06	263487206	101087	8
70	L-Asparagine	71 L-Asparagine	C4H8N2O3	[M+H]+	10.3	12.3	15	0.2	133.061	133.06	-2	S21009	11.64	11.57	11.67	0.1	18034802	15964195	16659570	14967322	25212646	27253844	28555558	19451272	465822	79669	804152	91739	708635	90980	847160	112751	0.00617002	162.074	1.64065e+07	25118330	-0.614475	0.653167	1.21034e+06	2.07624e+07	5152	8
124	Pyruvic acid	125 Pyruvic acid	C3H4O3	[M-H]-	5.5	7.5	15	0.2	87.0088	87.0077	-12.3	S21016	5.94	5.79	5.95	0.16	1793133	1461599	1254804	1415344	3176820	3109137	2048494	3899109	29277	31188	33440	28962	39056	28363	40216	28515	0.00739062	135.307	1481220	3058390	-1.04599	0.484314	107131	2269805	634	8
15	Adenosine monophosphate	16 Adenosine monophosphate	C10H14N5O7P	[M+H]+	9.8	11.8	15	0.2	348.07	348.069	-2.8	S21004	10.84	10.77	10.87	0.1	65328544	57386284	70810928	81144192	40824052	45612004	53221128	46139604	3175328	82898	3420386	124618	2990514	91197	4257656	99859	0.00741681	134.829	68667487	46449197	0.563974	1.47834	5350921	57558342	11473	8
18	ADP	19 ADP	C10H15N5O10P2	[M-H]-	11.1	13.1	15	0.2	426.022	426.022	-0.3	S21014	12.24	12.18	12.46	0.28	1001135	1574640	646743	449488	2043686	3552394	3277972	2092323	27124	6385	182645	35285	126591	22203	307944	34062	0.00772044	129.526	918002	2.74159e+06	-1.57845	0.334842	288340	1.8298e+06	708	8
43	Dihydroxyacetone phosphate	44 Dihydroxyacetone phosphate	C3H7O6P	[M-H]-	12	13	15	0.2	168.991	168.99	-5	S21014	12.44	12.34	12.55	0.21	2442026	93983	419062	91182	3098900	8571171	5478884	5530819	9913	0	15275	2089	21946	0	17421	0	0.0079009	126.568	761563	5.66994e+06	-2.8963	0.134316	34991.5	3.21575e+06	3030	8
113	Oxoglutaric acid	114 Oxoglutaric acid	C5H6O5	[M-H]-	10.8	14.8	15	0.2	145.014	145.013	-7.2	S21007	12.74	12.5	12.78	0.27	5458572	6369400	4929423	5118805	10909024	9056679	6773330	9134667	25326	17754	30965	14326	21311	19744	44079	20439	0.00832793	120.078	5469050	8968425	-0.713564	0.609812	82729	7.21874e+06	1421	8
27	CDP	28 CDP	C9H15N3O11P2	[M+H]+	13	15	15	0.2	404.026	404.024	-3.6	S21008	14.16	14.15	14.34	0.19	162031	188370	107440	119017	239952	373359	390508	245471	9838	0	53384	10508	28414	6588	67135	11526	0.00923638	108.267	144214	312322	-1.11482	0.461749	80272.4	228268	54	8
26	Carnosine	27 Carnosine	C9H14N4O3	[M+H]+	10.6	12.6	15	0.2	227.114	227.113	-2.9	S21006	11.93	11.86	12.08	0.21	351680	378755	258268	297524	194794	170251	243781	209479	20066	5998	15289	0	27889	0	25061	8647	0.00936581	106.771	321557	204576	0.652435	1.57182	48606.2	263066	44	8
67	L-Acetylcarnitine	68 L-Acetylcarnitine	C9H17NO4	[M+H]+	6.3	8.3	15	0.2	204.123	204.123	-2.1	S21006	7.57	7.47	7.6	0.12	1356361088	1381872640	1177530496	1313142784	1151960576	1151424512	1035787456	1108455936	178312	25552	272093	54627	317282	52871	395040	52166	0.0103371	96.739	1307226752	1111907120	0.233473	1.17566	515479	1209566936	137567	8
21	Argininosuccinic acid	22 Argininosuccinic acid	C10H18N4O6	[M-H]-	12.5	14.5	15	0.2	289.115	289.115	-0.6	S21006	13.67	13.62	13.76	0.14	429530	693211	401477	755652	1906653	1627429	872984	2203537	54259	1762	25697	0	64113	0	86065	3550	0.0111168	89.954	569968	1.65265e+06	-1.53583	0.344881	98292.2	1.11131e+06	290	8
16	Adenosine triphosphate	17 Adenosine triphosphate	C10H16N5O13P3	[M-H]-	12.5	14.5	15	0.2	505.988	505.986	-4.9	S21014	13.74	13.67	13.97	0.3	36256	68187	36256	36256	105174	180286	113901	84922	0	0	17271	3242	14201	0	30696	4606	0.0132984	75.1969	44238.8	121071	-1.45247	0.365396	36256	82654.8	17	5
41	D-Glyceraldehyde 3-phosphate	42 D-Glyceraldehyde 3-phosphate	C3H7O6P	[M-H]-	13	14	15	0.2	168.991	168.991	-0.3	S21014	13.15	13.03	13.32	0.3	40541	21301.8	22186	21301.8	41627	93112	64314	64490	6663	0	7332	0	7243	0	5314	3586	0.0141217	70.8131	26332.6	65885.8	-1.32312	0.399671	21301.8	46109.2	8	6
135	Ureidosuccinic acid	136 Ureidosuccinic acid	C5H8N2O5	[M-H]-	12.8	14.8	15	0.2	175.036	175.035	-4.8	S21013	13.88	13.65	14	0.35	126226	128218	109370	97512	1394419	771391	496937	518864	3791	0	3410	0	0	0	3835	3119	0.0174765	57.2197	115332	795403	-2.7859	0.144998	15308.1	455367	180	8
97	N-Acetyl-L-methionine	98 N-Acetyl-L-methionine	C7H13NO3S	[M+H]+	3	5	15	0.2	192.069	192.069	-1.5	S21014	4.27	4.02	4.49	0.47	340883	332024	223129	272602	391937	430332	375196	369446	11817	0	10147	12177	9571	7648	10866	10880	0.0178086	56.1528	292160	391728	-0.423095	0.745823	37414.8	341944	26	8
99	N-Acetylornithine	100 N-Acetylornithine	C7H14N2O3	[M+H]+	8.6	10.6	15	0.2	175.108	175.107	-1.3	S21009	10.03	9.87	10.05	0.18	6625530	7334833	5930022	7305522	6049988	5754959	5141322	5349044	79802	62809	89659	54429	116244	61671	107254	55244	0.0200501	49.8751	6.79898e+06	5.57383e+06	0.286649	1.2198	245167	6.1864e+06	376	8
94	N-Acetylglutamic acid	95 N-Acetylglutamic acid	C7H11NO5	[M+H]+	10.3	12.3	15	0.2	190.071	190.071	-2.1	S21014	11.32	11.1	11.4	0.3	3720366	3129967	2994724	3022174	3724684	4232724	3793621	3728080	19201	10008	15241	14388	19696	10615	20486	14596	0.0206918	48.3283	3.21681e+06	3.86978e+06	-0.266621	0.831264	56586.6	3.54329e+06	206	8
24	Butyrylcarnitine	25 Butyrylcarnitine	C11H21NO4	[M+H]+	4.2	6.2	15	0.2	232.154	232.154	-2.3	S21006	5.62	5.45	5.79	0.34	661058	670327	502734	641074	922285	799684	766874	691403	11304	8741	10512	10198	8837	9698	7868	9525	0.0294847	33.9159	618798	795062	-0.361597	0.778302	38756.1	706930	31	8
109	Orotic acid	110 Orotic acid	C5H4N2O4	[M-H]-	6.7	8.7	15	0.2	155.01	155.009	-7.3	S21013	7.57	7.47	7.68	0.22	4785078	4425946	3894072	4789272	6794034	6093240	4904416	5341165	0	2821	0	0	2514	0	3588	1994	0.0310587	32.1971	4473592	5.78321e+06	-0.370438	0.773548	14093.9	5.1284e+06	213	8
59	Guanosine diphosphate	60 Guanosine diphosphate	C10H15N5O11P2	[M-H]-	13.8	15.8	15	0.2	442.017	442.015	-5.6	S21015	15.1	14.99	15.33	0.34	82669	127845	75638	71503.4	133201	202151	246316	126764	3872	0	33266	14724	31493	6227	59662	14765	0.0318567	31.3905	89413.8	177108	-0.986059	0.504855	71503.4	133261	8	7
142	Uridine triphosphate	143 Uridine triphosphate	C9H15N2O15P3	[M-H]-	15	18	15	0.2	482.961	482.959	-5.5	S21014	15.2	15.01	15.42	0.41	37798	53288	36216	29274.2	77184	115544	76902	48631	0	0	12642	0	9093	2361	23316	3986	0.0328115	30.4772	39144.1	79565.2	-1.02334	0.491974	29274.2	59354.7	4	7
54	Glycerol 3-phosphate	55 Glycerol 3-phosphate	C3H9O6P	[M-H]-	11.5	13	15	0.2	171.006	171.006	-5.3	S21006	12.06	11.89	12.3	0.41	218922	268906	184114	188256	343704	1008763	825405	431589	6834	2385	6586	0	8476	2092	14353	4037	0.0337125	29.6626	215050	652365	-1.60101	0.329646	26786.1	433707	39	8
11	Acetylcysteine	12 Acetylcysteine	C5H9NO3S	[M+H]+	6	8	15	0.2	164.038	164.038	0	S21016	7	6.88	7.16	0.28	47343	27339	30189	19684	40082	59530	54792	85336	0	0	5992	0	0	0	0	0	0.0408118	24.5027	31138.8	59935	-0.944688	0.519542	12247	45536.9	2	8
53	Glutathione	54 Glutathione	C10H17N3O6S	[M+H]+	10	13	15	0.2	308.091	308.09	-3.2	S21001	11.41	11.35	11.45	0.09	61081116	53315432	49344552	52239172	49329788	45547348	47174176	46663588	156551	85576	440535	230308	600120	330924	959870	482096	0.0410587	24.3554	53995068	47178725	0.194691	1.14448	1.24224e+06	5.05869e+07	1410	8
45	D-Sedoheptulose 7-phosphate	46 D-Sedoheptulose 7-phosphate	C7H15O10P	[M-H]-	12.2	14.2	15	0.2	289.033	289.033	-1.1	S21006	13.29	13.25	13.44	0.19	2136508	2340922	1480298	2895684	3415072	3750978	2978771	2509083	55239	2490	74746	8105	59994	8855	180934	8947	0.0540013	18.5181	2213353	3163476	-0.515277	0.699659	159741	2.68841e+06	71	8
22	Beta-Alanine	23 Beta-Alanine	C3H7NO2	[M+H]+	9.8	10.5	15	0.2	90.055	90.0554	4.9	S21008	10.05	9.93	10.3	0.37	1282898	1003352	993650	1109550	1300777	1309570	1523538	1136355	45282	40567	55615	41227	59960	39751	60544	44760	0.0785618	12.7288	1.09736e+06	1317560	-0.263828	0.832875	155390	1.20746e+06	18	8
78	L-Histidine	79 L-Histidine	C6H9N3O2	[M+H]+	9.9	11.9	15	0.2	156.077	156.077	-1.6	S21015	10.94	10.92	11.18	0.25	469274720	499700864	454575552	392796160	495140672	494476640	518322752	503506976	6630341	661024	20692758	2072504	31607652	2755984	26378404	2948461	0.0798284	12.5269	454086824	502861760	-0.147194	0.903005	35165173	478474292	6638	8
106	Nicotinic acid	107 Nicotinic acid	C6H5NO2	[M-H]-	5.5	7.5	15	0.2	122.025	122.023	-11.9	S21008	5.47	5.47	5.71	0.24	68305	35428	84155	86226	43296	41860	51244	36231	7991	4211	12122	9266	12430	6896	7097	7795	0.0815886	12.2566	68528.5	43157.8	0.667084	1.58786	35428	55843.1	1	7
0	1-Methylnicotinamide	1 1-Methylnicotinamide	C7H8N2O	[M+H]+	19	21	15	0.2	137.071	137.071	-1.7	S21002	19.25	19.09	19.42	0.33	151188	191775	133864	178797	103710	154631	136333	118605	38242	22880	34068	31086	40449	20984	30824	20243	0.0829612	12.0538	163906	128320	0.353125	1.27732	99541	146113	2	8
28	Choline	29 Choline	C5H14NO	[Cat]+	11	15	15	0.2	104.107	104.107	2	S21008	14.99	14.98	15	0.02	88324544	127334872	115434224	154748624	164611472	156217088	182671328	126800232	864319	185605	463481	104110	869305	159474	803991	181097	0.0921782	10.8486	121460566	157575030	-0.375551	0.770811	1.37177e+06	139517798	1964	8
9	Acetoacetic acid	10 Acetoacetic acid	C4H6O3	[M-H]-	8.3	10.3	15	0.2	101.024	101.023	-14	S21019	9.71	9.5	9.87	0.37	145063	162008	84760	174956	208105	204098	142138	256434	7593	4985	9572	9208	14674	8325	13632	8721	0.0946756	10.5624	141697	202694	-0.516495	0.699068	38766.2	172195	3	8
12	Adenine	13 Adenine	C5H5N5	[M+H]+	5	7	15	0.2	136.062	136.061	-2	S21019	5.81	5.77	6.05	0.29	5879732	8001253	3422715	4258571	22150316	8607229	10841067	7111383	653497	138789	560304	185950	422910	169490	369642	228547	0.105026	9.52148	5.39057e+06	1.21775e+07	-1.17571	0.442666	1.03342e+06	8.78403e+06	189	8
50	Fructose 6-phosphate	51 Fructose 6-phosphate	C6H13O9P	[M-H]-	12.6	13.5	15	0.2	259.022	259.022	-1.7	S21006	13.24	13.01	13.31	0.3	4494516	1833216	2807036	3921001	4157271	5937488	8226944	3734283	544371	19943	441880	20892	368272	17791	512615	24471	0.105507	9.47808	3.26394e+06	5.514e+06	-0.756483	0.591938	741338	4.38897e+06	70	8
17	Adenylsuccinic acid	18 Adenylsuccinic acid	C14H18N5O11P	[M-H]-	14.5	16.5	15	0.2	462.067	462.064	-5.3	S21006	15.68	15.55	15.75	0.2	126986	139031	101416	124706	95205	123915	104933	83883	3895	0	15345	2709	16534	0	22525	2514	0.118579	8.43319	123035	101984	0.270723	1.20641	33820.8	112509	1	8
128	S-Adenosylmethionine	129 S-Adenosylmethionine	C15H22N6O5S	[M+H]+	10.7	12.7	15	0.2	399.144	399.144	-2.5	S21008	12.39	12.35	12.5	0.16	7019414	9039964	7786022	7817352	8144123	6396266	6872131	6043668	639503	20876	1127956	49878	1534090	61046	2428599	76284	0.141187	7.08279	7915688	6864047	0.205655	1.15321	2236837	7.38987e+06	60	8
37	Cytidine triphosphate	38 Cytidine triphosphate	C9H16N3O14P3	[M-H]-	15	20	15	0.2	481.977	481.976	-3	S21014	15.56	15.37	15.79	0.42	12384.6	12384.6	12384.6	12384.6	14752	39377	24222	12384.6	0	0	0	0	0	0	6359	0	0.143594	6.96407	12384.6	22683.9	-0.873119	0.545965	12384.6	17534.3	0	3
132	Thymidine	133 Thymidine	C10H14N2O5	[M-H]-	3.5	5.5	15	0.2	241.083	241.082	-2.9	S21015	4.41	4.18	4.65	0.47	118327	64424	80244	98723	114593	119688	264111	116676	26231	17177	14056	21269	10892	18415	11821	21173	0.151887	6.58384	90429.5	153767	-0.765881	0.588094	62887.8	122098	1	8
58	Guanosine	59 Guanosine	C10H13N5O5	[M+H]+	7.7	9.7	15	0.2	284.099	284.098	-3	S21013	9.03	8.91	9.08	0.17	5713625	5201582	5187412	5606839	7273866	6296255	4835234	6885760	84190	16592	78493	12891	76329	11249	56370	7831	0.155963	6.41177	5.42736e+06	6.32278e+06	-0.220307	0.858383	138979	5.87507e+06	44	8
131	Taurine	132 Taurine	C2H7NO3S	[M-H]-	10.2	12.2	15	0.2	124.007	124.006	-11.2	S21015	11.41	11.27	11.49	0.21	60464	45293.9	55237	55360	51188	120890	126614	52786	10300	14813	13101	9058	10732	10440	13735	11938	0.158721	6.30037	54088.7	87869.5	-0.700035	0.615557	45293.9	70979.1	1	7
33	Creatinine	34 Creatinine	C4H7N3O	[M+H]+	5.2	7.2	15	0.2	114.066	114.066	0.1	S21006	6.46	6.42	6.48	0.07	75228848	76039928	61681652	68857920	68366480	67041096	58371596	63709516	441152	358969	349774	373880	380130	371483	362266	366083	0.180321	5.54567	70452087	64372172	0.130205	1.09445	1.1364e+06	6.74121e+07	409	8
35	Cytidine	36 Cytidine	C9H13N3O5	[M+H]+	7.1	9.1	15	0.2	244.093	244.092	-1.6	S21009	8.35	8.32	8.42	0.1	5572136	5721322	4494207	4768076	3955710	5450148	4272888	4194646	92998	24123	63794	18793	49498	14446	25509	19837	0.18597	5.37722	5.13894e+06	4468348	0.201728	1.15007	125874	4.80364e+06	30	8
49	Fructose 1,6-bisphosphate	50 Fructose 1,6-bisphosphate	C6H14O12P2	[M-H]-	14.1	16.1	15	0.2	338.989	338.988	-3.5	S21008	15.34	15.19	15.58	0.39	116380	115704	420564	156003	157330	996444	1477788	134224	4508	0	61567	6218	23950	2684	173764	9185	0.198012	5.05019	202163	691446	-1.7741	0.292376	115704	446805	8	7
103	NADP	104 NADP	C21H29N7O17P3	[Cat]+	12.7	14.7	15	0.2	744.083	744.08	-3.4	S21008	13.92	13.89	14.13	0.25	382590	420304	298619	345417	269022	353300	347461	287558	7464	4541	28007	5062	22734	4122	47833	4296	0.207355	4.82266	361732	314335	0.202619	1.15079	56522.1	338034	2	8
76	L-Glutamic acid	77 L-Glutamic acid	C5H9NO4	[M+H]+	10	13	15	0.2	148.06	148.06	-2.3	S21007	11.68	11.59	11.7	0.11	654928256	638335168	593272768	626465536	636847168	593418688	596069056	594537536	17245526	821533	18847084	1184088	19974700	1164571	27229938	1723148	0.218888	4.56855	628250432	605218112	0.0538846	1.03806	3.30815e+07	616734272	2925	8
61	Guanosine triphosphate	62 Guanosine triphosphate	C10H16N5O14P3	[M-H]-	15	17	15	0.2	521.983	521.979	-9.4	S21014	16.6	16.35	16.84	0.49	12914.5	12914.5	12914.5	12914.5	12914.5	20543	15118	12914.5	0	0	2431	2107	0	0	3234	0	0.221067	4.52351	12914.5	15372.5	-0.25136	0.840104	12914.5	14143.5	0	2
143	Valerylcarnitine	144 Valerylcarnitine	C12H23NO4	[M+H]+	3.6	5.7	15	0.2	246.17	246.169	-2.8	S21007	4.93	4.7	5	0.3	264790	252653	194761	229701	230399	223931	181702	203564	13628	15857	11668	13643	12993	9388	14437	14272	0.225257	4.43938	235476	209899	0.165886	1.12186	49707.2	222688	1	8
32	Creatine	33 Creatine	C4H9N3O2	[M+H]+	10	11.5	15	0.2	132.077	132.077	-1.2	S21008	10.95	10.91	10.99	0.08	2658000	1535524	2195480	2038054	1415785	1712835	2314204	1.17788e+06	394898	376050	410814	400252	393449	367920	401631	369323	0.229158	4.36379	2.10676e+06	1.65518e+06	0.348045	1.27283	1.17788e+06	1.88097e+06	10	7
114	Palmitic acid	115 Palmitic acid	C16H32O2	[M-H]-	1.6	3.6	15	0.2	255.233	255.232	-2.2	S21008	2.6	2.53	2.66	0.13	42389560	23467902	75342616	40701824	108668248	95077832	16523643	76852208	583021	527186	545430	520455	665445	480293	1245635	462329	0.25764	3.88139	4.54755e+07	7.42805e+07	-0.707894	0.612213	1.89617e+06	5.9878e+07	380	8
125	Ribose 1-phosphate	126 Ribose 1-phosphate	C5H11O8P	[M-H]-	11	12.4	15	0.2	229.012	229.011	-2.1	S21019	12.09	12.05	12.11	0.06	4693286	4988012	4508496	5770822	4181418	4150570	5326102	4424284	104110	9873	95871	7823	232052	6885	68788	5220	0.275633	3.62802	4990154	4.52059e+06	0.142572	1.10387	208983	4.75537e+06	19	8
102	NADH	103 NADH	C21H29N7O14P2	[M-H]-	9.5	11.5	15	0.2	664.117	664.114	-5.3	S21015	10.55	10.53	10.75	0.23	180145	19355	10000	27291	44996	147472	333708	70164	0	0	0	0	0	0	0	0	0.286298	3.49287	59197.8	149085	-1.33252	0.397074	10000	104141	1	7
23	Betaine	24 Betaine	C5H11NO2	[M+H]+	7	8.2	15	0.2	118.086	118.086	0.4	S21008	7.87	7.8	7.87	0.07	531556096	307210912	407607744	412264640	287075488	314808256	490231104	245860048	946404	956435	1042694	929935	999649	977086	1163093	979891	0.300212	3.33098	414659848	334493724	0.309949	1.23966	3.0082e+06	374576786	1547	8
52	Glucose 6-phosphate	53 Glucose 6-phosphate	C6H13O9P	[M-H]-	13.6	14.4	15	0.2	259.022	259.022	-0.6	S21008	13.93	13.86	13.93	0.07	15511645	6999394	11052373	11419230	11227284	15866118	20671072	10103573	2419216	42456	2150449	75278	2063197	64791	3781504	118145	0.32063	3.11886	1.12457e+07	1.4467e+07	-0.363399	0.777331	4.02814e+06	1.28563e+07	52	8
107	O-Phosphoethanolamine	108 O-Phosphoethanolamine	C2H8NO4P	[M+H]+	11.4	13.4	15	0.2	142.026	142.026	-0.5	S21002	12.74	12.62	12.9	0.28	58323	59421	53426	45292	33080	58780	55402	38736	3982	0	4341	0	4371	0	8401	0	0.320833	3.11689	54115.5	46499.5	0.218827	1.16379	17910.6	50307.5	0	8
81	L-Lactic acid	82 L-Lactic acid	C3H6O3	[M-H]-	6.2	8.2	15	0.2	89.0244	89.0233	-12.6	S21014	7.04	7	7.08	0.08	4.70597e+06	4.70597e+06	4.70597e+06	4.70597e+06	4.70597e+06	7416082	4805585	4.70597e+06	1602657	1562534	1573654	1573948	1541684	1524426	1501105	1642578	0.334595	2.98869	4.70597e+06	5.4084e+06	-0.20071	0.870122	4.70597e+06	5.05719e+06	17	2
63	Hypotaurine	64 Hypotaurine	C2H7NO2S	[M+H]+	10	12	15	0.2	110.027	110.026	-5.7	S21012	11.02	10.85	11.25	0.4	40811	42278	54671	39722	32103	59101	57120	61075	0	0	0	0	0	0	4990	0	0.33613	2.97504	44370.5	52349.8	-0.238582	0.847578	11871.2	48360.1	0	8
146	Xanthylic acid	147 Xanthylic acid	C10H13N4O9P	[M-H]-	11	13	15	0.2	363.035	363.036	4	S21015	11.75	11.75	11.75	0	10000	10000	10000	10000	10000	10000	40070	10000	0	0	0	0	0	0	0	0	0.355918	2.80964	10000	17517.5	-0.808797	0.570858	10000	13758.8	0	1
19	Allantoin	20 Allantoin	C4H6N4O3	[M-H]-	9.3	11.3	15	0.2	157.037	157.036	-7.7	S21006	10.3	10.19	10.39	0.21	12665	12073	12073	12073	12073	12073	12073	12073	0	2961	0	0	0	2567	0	0	0.355918	2.80964	12221	12073	0.0175781	1.01226	12073	12147	0	1
13	Adenosine	14 Adenosine	C10H13N5O4	[M+H]+	4.5	7	15	0.2	268.104	268.103	-2.4	S21019	5.78	5.76	5.88	0.12	8947122	3.43465e+06	20284444	25848942	137684992	20674882	3922167	17183248	3451116	367305	2443088	234860	1638992	185502	639540	171985	0.37513	2.66574	1.46288e+07	4.48663e+07	-1.61682	0.326053	3.43465e+06	2.97476e+07	243	7
96	N-Acetyl-L-alanine	97 N-Acetyl-L-alanine	C5H9NO3	[M+H]+	6	7	15	0.2	132.065	132.065	-1.7	S21002	6.47	6.39	6.71	0.32	1073726	1153480	939896	1132374	1011750	1068804	1069248	954413	34542	29647	51234	33858	54394	44618	51017	37509	0.41158	2.42966	1074869	1.02605e+06	0.0670545	1.04758	136307	1.05046e+06	3	8
25	Carbamoyl phosphate	26 Carbamoyl phosphate	CH4NO5P	[M-H]-	27	30	15	0.2	139.975	139.975	-6	S21001	27.01	27	27.13	0.13	188475	68768	43846	33288	25639.4	54152	25639.4	97194	4132	1765	10814	3728	10339	1902	7167	1858	0.436715	2.28983	83594.2	50656.2	0.722665	1.65023	25639.4	67125.2	0	6
8	6-Phosphogluconic acid	9 6-Phosphogluconic acid	C6H13O10P	[M-H]-	14	17	15	0.2	275.017	275.017	-2	S21019	14.91	14.7	15.09	0.39	782661	96953	250696	348617	85829	238919	467572	138635	11016	0	17674	0	41093	2105	35161	4398	0.45006	2.22193	369732	232739	0.667768	1.58861	51792.6	301235	1	8
127	S-Adenosylhomocysteine	128 S-Adenosylhomocysteine	C14H20N6O5S	[M-H]-	8.6	10.6	15	0.2	383.114	383.12	15.1	S21016	9.4	9.26	9.65	0.39	138439	175038	147471	125051	103092	96446	97939	1034854	0	0	0	0	0	0	0	0	0.455933	2.1933	146500	333083	-1.18498	0.43983	10000	239791	1	8
74	L-Cysteine	75 L-Cysteine	C3H7NO2S	[M+H]+	13	17	15	0.2	122.027	122.027	-1.9	S21002	16.9	16.76	16.99	0.23	27852	39674	32067	29458	25941.2	29000	26602	36364	5856	4652	7184	3840	6503	4260	5320	4895	0.461706	2.16588	32262.8	29476.8	0.130289	1.09451	25941.2	30869.8	0	7
1	2,3-Diphosphoglyceric acid	2 2,3-Diphosphoglyceric acid	C3H8O10P2	[M-H]-	12	15	15	0.2	264.952	264.95	-6.8	S21019	14.67	14.6	14.84	0.23	43950	47971	46823	67682	53868	43729	48776	42088	6112	2310	9552	3024	19347	1898	18392	2534	0.485436	2.06	51606.5	47115.2	0.131359	1.09532	33688.4	49360.9	0	8
123	Propionylcarnitine	124 Propionylcarnitine	C10H19NO4	[M+H]+	5.2	7.2	15	0.2	218.139	218.138	-2.2	S21006	6.46	6.24	6.61	0.37	25474532	26096670	20442714	23273282	27236598	26869912	23473164	22695512	16452	14213	17114	14787	16525	14620	18883	13066	0.497174	2.01137	2.38218e+07	2.50688e+07	-0.0736103	0.950257	57122.5	24445298	52	8
48	Folic acid	49 Folic acid	C19H19N7O6	[M+H]+	13	16	15	0.2	442.147	442.152	10.9	S21001	13.37	13.13	13.53	0.39	27887	10596	14350	10000	15168	13298	13138	10000	0	0	0	0	0	0	0	0	0.538734	1.8562	15708.2	12901	0.28404	1.2176	10000	14304.6	0	6
6	5'-Methylthioadenosine	7 5'-Methylthioadenosine	C11H15N5O3S	[M+H]+	3	5	15	0.2	298.097	298.096	-3.1	S21007	4.14	3.97	4.17	0.2	6749668	7157858	5728988	5560512	6175696	6404306	6411678	4873000	101997	9037	144074	20142	183857	19521	268685	28152	0.556776	1.79606	6.29926e+06	5966170	0.0783765	1.05583	300799	6.13271e+06	12	8
118	Phosphoenolpyruvic acid	119 Phosphoenolpyruvic acid	C3H5O6P	[M-H]-	13.6	15.6	15	0.2	166.975	166.974	-6	S21019	14.74	14.67	14.83	0.16	11828416	11307026	11721967	12635091	10901774	11106257	13448851	10380947	2075505	62554	3969506	333587	5409522	439476	4069373	204346	0.593948	1.68365	11873125	1.14595e+07	0.051161	1.0361	6.22145e+06	1.16663e+07	20	8
3	3-Phosphoglyceric acid	4 3-Phosphoglyceric acid	C3H7O7P	[M-H]-	13	15	15	0.2	184.986	184.985	-4.7	S21019	14.12	13.88	14.18	0.3	22833332	24572438	23690548	24806950	22951816	25941794	29281636	21502848	4370613	13132	6107761	1272479	10522380	1515760	8095642	1331696	0.615172	1.62556	23975817	2.49195e+07	-0.0556965	0.96213	1.2471e+07	2.44477e+07	41	8
34	Cyclic AMP	35 Cyclic AMP	C10H12N5O6P	[M-H]-	5.8	7.8	15	0.2	328.045	328.044	-2.9	S21019	6.06	5.84	6.16	0.32	157409	53796	243881	200165	216239	130492	303147	126625	2271	2139	0	0	2084	0	2269	0	0.622013	1.60768	163813	194126	-0.244944	0.843849	13286.1	178969	0	8
40	D-Glucose	41 D-Glucose	C6H12O6	[M-H]-	9	11	15	0.2	179.056	179.055	-4	S21008	10.21	9.99	10.22	0.23	16556572	10806419	14425153	13865060	9007300	10078071	22463582	6752897	22103	15606	19496	14432	21361	19981	20280	21273	0.639323	1.56415	13913301	1.20755e+07	0.204386	1.1522	67949.5	1.29944e+07	23	8
69	L-Arginine	70 L-Arginine	C6H14N4O2	[M+H]+	18.5	21	15	0.2	175.119	175.119	-1.4	S21009	20.17	20.17	20.4	0.23	984592960	979015296	888694912	943977024	956396544	975621248	913763008	898976896	343338752	94952224	403437632	139260144	443666752	151799808	434235200	140715408	0.666129	1.50121	949070048	936189424	0.0197141	1.01376	806787220	942629736	1435	8
56	Guanidoacetic acid	57 Guanidoacetic acid	C3H7N3O2	[M+H]+	10.7	12.7	15	0.2	118.061	118.061	0.8	S21008	12.01	11.95	12.04	0.09	2845724	1320204	2412496	2123670	1857794	2121336	4197408	1660289	54245	17365	71111	22964	54439	22980	131280	27184	0.686436	1.4568	2.17552e+06	2.45921e+06	-0.17683	0.884644	160588	2.31737e+06	4	8
14	Adenosine diphosphate ribose	15 Adenosine diphosphate ribose	C15H23N5O14P2	[M-H]-	10.9	12.9	15	0.2	558.064	558.061	-6.5	S21009	12.02	11.94	12.14	0.2	11359.4	18623	11359.4	11359.4	11359.4	15748	11359.4	11359.4	0	0	0	0	0	0	3625	0	0.746321	1.33991	13175.3	12456.5	0.0809314	1.0577	11359.4	12815.9	0	2
93	N6-Acetyl-L-lysine	94 N6-Acetyl-L-lysine	C8H16N2O3	[M+H]+	1.9	3.9	15	0.2	189.123	189.122	-8.8	S21016	2.92	2.86	2.96	0.1	2117628	1.56149e+06	1.56149e+06	1.56149e+06	1.56149e+06	1744855	1.56149e+06	2202770	519447	546931	454369	476753	532686	465946	539709	601453	0.755037	1.32444	1.70052e+06	1.76765e+06	-0.055855	0.962024	1.56149e+06	1.73408e+06	2	3
101	NAD	102 NAD	C21H28N7O14P2	[Cat]+	9.9	11.9	15	0.2	664.116	664.114	-3	S21002	10.98	10.86	11.03	0.16	5641429	8322845	3725593	5396338	5220572	7104708	5636120	6206176	65922	0	68183	0	38649	0	222099	0	0.802626	1.24591	5.77155e+06	6041894	-0.0660417	0.955255	158070	5.90672e+06	8	8
36	Cytidine monophosphate	37 Cytidine monophosphate	C9H14N3O8P	[M+H]+	11.8	13.8	15	0.2	324.059	324.058	-3.2	S21006	12.9	12.83	13	0.17	3181286	2629604	2694252	2959538	2611438	2988921	3245904	2386316	109271	3811	99234	11496	120505	6214	161247	11668	0.809195	1.2358	2866170	2.80814e+06	0.0295069	1.02066	206292	2.83716e+06	4	8
47	FAD	48 FAD	C27H33N9O15P2	[M+H]+	7.6	9.6	15	0.2	786.164	786.162	-3.3	S21006	8.77	8.58	8.82	0.23	112020	127227	89345	123130	125701	121437	84342	108553	0	0	0	0	0	0	0	0	0.824221	1.21327	112930	110008	0.0378235	1.02656	10000	111469	0	8
5	4-Hydroxyproline	6 4-Hydroxyproline	C5H9NO3	[M+H]+	10.2	11.2	15	0.2	132.065	132.065	-0.2	S21016	10.37	10.26	10.44	0.19	12487164	14396793	10581293	12953763	13571897	13292214	9928641	14783961	61939	37911	77597	48904	93056	48456	92924	57444	0.831794	1.20222	1.26048e+07	1.28942e+07	-0.032752	0.977554	204337	1.27495e+07	16	8
60	Guanosine monophosphate	61 Guanosine monophosphate	C10H14N5O8P	[M+H]+	12.6	14.6	15	0.2	364.065	364.064	-3	S21015	13.73	13.66	13.77	0.11	3696334	3449334	3166818	3653446	2912888	3699046	4199799	2922485	122541	8678	211819	17643	183518	12110	369146	20582	0.869288	1.15037	3491483	3.43355e+06	0.0241371	1.01687	364764	3.46252e+06	4	8
10	Acetyl-CoA	11 Acetyl-CoA	C23H38N7O17P3S	[M+H]+	8	11	15	0.2	810.133	810.129	-4.9	S21009	9.55	9.51	9.66	0.14	76919	134984	10000	10000	61575	124999	10000	53394	0	0	0	0	0	0	0	0	0.910073	1.09881	57975.8	62492	-0.108222	0.927731	10000	60233.9	0	5
83	L-Lysine	84 L-Lysine	C6H14N2O2	[M+H]+	18	20	15	0.2	147.113	147.113	-2.1	S21009	19.21	19.17	19.34	0.17	466568256	468098272	443011488	429620128	464999616	459209248	446762368	434783296	124107856	14626129	159557648	24295790	190818784	30850518	148514592	23676322	0.974395	1.02628	451824536	451438632	0.00123273	1.00085	2.68678e+08	451631584	464	8
46	dTDP	47 dTDP	C10H16N2O11P2	[M-H]-	11	13	15	0.2	401.016	401.014	-5.1	S21004	11.74	11.59	11.85	0.26	72952	70677	81900	121097	79939	91249	104286	70770	5252	0	10544	0	10740	2590	10027	3431	0.994698	1.00533	86656.5	86561	0.0015908	1.0011	25969	86608.8	0	8

## Sheet: WT vs. dhh1
	Skeleton_Metabolite	Metabolite	Formula	Ion Type	RT Start (min)	RT End (min)	m/z Tolerance (ppm)	RT Tolerance (min)	mz	obs_mz	ppm	winner	RT	RT_min	RT_max	RT_range	WT1	WT2	WT3	WT4	DH1	DH2	DH3	DH4	Blank_0	Blank_1	Blank_2	Blank_3	Blank_4	Blank_5	Blank_6	Blank_7	ttest_pval	1/pvalue	Control_Mean	Treatment_dhh1_Mean	Log2FoldChange	LogFoldChange	blank_threshold	combined_mean	impact_score	Detection
0	1-Methylnicotinamide	1 1-Methylnicotinamide	C7H8N2O	[M+H]+	19	21	15	0.2	137.071	137.071	-1.7	S21002	19.25	19.09	19.42	0.33	151188	191775	133864	178797	130997	131674	108202	147482	38242	22880	34068	31086	40449	20984	30824	20243	0.067439	14.8282	163906	129589	0.338928	1.26482	99541	146747	3	8
1	2,3-Diphosphoglyceric acid	2 2,3-Diphosphoglyceric acid	C3H8O10P2	[M-H]-	12	15	15	0.2	264.952	264.95	-6.8	S21019	14.67	14.6	14.84	0.23	43950	47971	46823	67682	53892	60603	71747	64451	6112	2310	9552	3024	19347	1898	18392	2534	0.143739	6.95708	51606.5	62673.2	-0.280297	0.823421	33688.4	57139.9	0	8
2	3-Hydroxybutyric acid	3 3-Hydroxybutyric acid	C4H8O3	[M-H]-	5.7	7.7	15	0.2	103.04	103.038	-15.2	S21008	5.81	5.71	5.9	0.18	37738	37738	37738	37738	37738	37738	37738	37738	10687	9027	7931	7947	9384	8121	10526	10345	NA	NA	37738	37738	0	1	37738	37738	0	0
3	3-Phosphoglyceric acid	4 3-Phosphoglyceric acid	C3H7O7P	[M-H]-	13	15	15	0.2	184.986	184.985	-4.7	S21019	14.12	13.88	14.18	0.3	22833332	24572438	23690548	24806950	27263226	26290568	25845466	29663438	4370613	13132	6107761	1272479	10522380	1515760	8095642	1331696	0.0142681	70.0866	23975817	2.72657e+07	-0.185506	0.879341	1.2471e+07	2.56207e+07	2042	8
4	4,5-Dihydroorotic acid	5 4,5-Dihydroorotic acid	C5H6N2O4	[M-H]-	7.5	9.5	15	0.2	157.025	157.025	-3.1	S21014	8.44	8.29	8.54	0.24	28792	20004	16371.6	18620	26822	16371.6	19046	18453	0	0	2752	2651	2638	3024	3294	2632	0.834922	1.19772	20946.9	20173.2	0.0543004	1.03836	16371.6	20560	0	6
5	4-Hydroxyproline	6 4-Hydroxyproline	C5H9NO3	[M+H]+	10.2	11.2	15	0.2	132.065	132.065	-0.2	S21016	10.37	10.26	10.44	0.19	12487164	14396793	10581293	12953763	4922476	3567323	4462182	3740826	61939	37911	77597	48904	93056	48456	92924	57444	6.00634e-05	16649.1	1.26048e+07	4.1732e+06	1.59474	3.0204	204337	8.38898e+06	421856	8
6	5'-Methylthioadenosine	7 5'-Methylthioadenosine	C11H15N5O3S	[M+H]+	3	5	15	0.2	298.097	298.096	-3.1	S21007	4.14	3.97	4.17	0.2	6749668	7157858	5728988	5560512	7169120	3916970	5222200	6060526	101997	9037	144074	20142	183857	19521	268685	28152	0.404403	2.47278	6.29926e+06	5592204	0.171765	1.12644	300799	5.94573e+06	17	8
7	5-Phosphoribosylamine	8 5-Phosphoribosylamine	C5H12NO7P	[M-H]-	11.5	13.5	15	0.2	228.028	228.026	-7.7	S21002	12.83	12.59	13.03	0.44	39793	43645	35558	33183	24473	19280.1	20129	19542	0	0	3778	0	12334	1941	5013	1681	0.000594588	1681.84	38044.8	20856	0.867233	1.82416	19280.1	29450.4	90	7
8	6-Phosphogluconic acid	9 6-Phosphogluconic acid	C6H13O10P	[M-H]-	14	17	15	0.2	275.017	275.017	-2	S21019	14.91	14.7	15.09	0.39	782661	96953	250696	348617	106210	183168	417645	195515	11016	0	17674	0	41093	2105	35161	4398	0.406894	2.45764	369732	225634	0.712491	1.63863	51792.6	297683	1	8
9	Acetoacetic acid	10 Acetoacetic acid	C4H6O3	[M-H]-	8.3	10.3	15	0.2	101.024	101.023	-14	S21019	9.71	9.5	9.87	0.37	145063	162008	84760	174956	186838	143121	132643	172927	7593	4985	9572	9208	14674	8325	13632	8721	0.494044	2.02411	141697	158882	-0.165151	0.891835	38766.2	150290	0	8
10	Acetyl-CoA	11 Acetyl-CoA	C23H38N7O17P3S	[M+H]+	8	11	15	0.2	810.133	810.129	-4.9	S21009	9.55	9.51	9.66	0.14	76919	134984	10000	10000	141292	10000	10000	34471	0	0	0	0	0	0	0	0	0.842184	1.18739	57975.8	48940.8	0.244413	1.18461	10000	53458.2	0	4
11	Acetylcysteine	12 Acetylcysteine	C5H9NO3S	[M+H]+	6	8	15	0.2	164.038	164.038	0	S21016	7	6.88	7.16	0.28	47343	27339	30189	19684	26732	24826	20533	49336	0	0	5992	0	0	0	0	0	0.931353	1.07371	31138.8	30356.8	0.0366937	1.02576	12247	30747.8	0	8
12	Adenine	13 Adenine	C5H5N5	[M+H]+	5	7	15	0.2	136.062	136.061	-2	S21019	5.81	5.77	6.05	0.29	5879732	8001253	3422715	4258571	9717156	19830446	11805224	5304973	653497	138789	560304	185950	422910	169490	369642	228547	0.0979038	10.2141	5.39057e+06	1.16644e+07	-1.11361	0.462136	1.03342e+06	8.52751e+06	188	8
13	Adenosine	14 Adenosine	C10H13N5O4	[M+H]+	4.5	7	15	0.2	268.104	268.103	-2.4	S21019	5.78	5.76	5.88	0.12	8947122	3.43465e+06	20284444	25848942	6370998	120517568	74797912	4756424	3451116	367305	2443088	234860	1638992	185502	639540	171985	0.244129	4.0962	1.46288e+07	5.16107e+07	-1.81886	0.283445	3.43465e+06	3.31198e+07	479	7
14	Adenosine diphosphate ribose	15 Adenosine diphosphate ribose	C15H23N5O14P2	[M-H]-	10.9	12.9	15	0.2	558.064	558.061	-6.5	S21009	12.02	11.94	12.14	0.2	11359.4	18623	11359.4	11359.4	19859	11359.4	11359.4	11359.4	0	0	0	0	0	0	3625	0	0.915579	1.09221	13175.3	13484.3	-0.0334449	0.977084	11359.4	13329.8	0	2
15	Adenosine monophosphate	16 Adenosine monophosphate	C10H14N5O7P	[M+H]+	9.8	11.8	15	0.2	348.07	348.069	-2.8	S21004	10.84	10.77	10.87	0.1	65328544	57386284	70810928	81144192	47798012	49250460	42779548	47648168	3175328	82898	3420386	124618	2990514	91197	4257656	99859	0.00565699	176.773	68667487	46869047	0.550992	1.46509	5350921	57768267	14961	8
16	Adenosine triphosphate	17 Adenosine triphosphate	C10H16N5O13P3	[M-H]-	12.5	14.5	15	0.2	505.988	505.986	-4.9	S21014	13.74	13.67	13.97	0.3	36256	68187	36256	36256	78136	64881	36256	87475	0	0	17271	3242	14201	0	30696	4606	0.152795	6.54472	44238.8	66687	-0.592095	0.663379	36256	55462.9	1	4
17	Adenylsuccinic acid	18 Adenylsuccinic acid	C14H18N5O11P	[M-H]-	14.5	16.5	15	0.2	462.067	462.064	-5.3	S21006	15.68	15.55	15.75	0.2	126986	139031	101416	124706	94787	72846	88711	81218	3895	0	15345	2709	16534	0	22525	2514	0.0056318	177.563	123035	84390.5	0.543913	1.45792	33820.8	103713	27	8
18	ADP	19 ADP	C10H15N5O10P2	[M-H]-	11.1	13.1	15	0.2	426.022	426.022	-0.3	S21014	12.24	12.18	12.46	0.28	1001135	1574640	646743	449488	1826483	1612804	621133	2231450	27124	6385	182645	35285	126591	22203	307944	34062	0.171602	5.82743	918002	1.57297e+06	-0.77692	0.583611	288340	1.24548e+06	12	8
19	Allantoin	20 Allantoin	C4H6N4O3	[M-H]-	9.3	11.3	15	0.2	157.037	157.036	-7.7	S21006	10.3	10.19	10.39	0.21	12665	12073	12073	12073	12073	12073	12073	12073	0	2961	0	0	0	2567	0	0	0.355918	2.80964	12221	12073	0.0175781	1.01226	12073	12147	0	1
20	Aminoadipic acid	21 Aminoadipic acid	C6H11NO4	[M-H]-	5.9	7.9	15	0.2	160.061	160.06	-7.1	S21007	7.42	7.29	7.53	0.24	5444028	5806707	4568336	3921158	3692464	2169056	1256388	2280101	3884	5963	4253	5572	6878	7448	3555	6049	0.00779042	128.363	4.93506e+06	2.3495e+06	1.07071	2.10047	26350.8	3.64228e+06	982	8
21	Argininosuccinic acid	22 Argininosuccinic acid	C10H18N4O6	[M-H]-	12.5	14.5	15	0.2	289.115	289.115	-0.6	S21006	13.67	13.62	13.76	0.14	429530	693211	401477	755652	788103	556864	732731	544520	54259	1762	25697	0	64113	0	86065	3550	0.4634	2.15796	569968	655554	-0.201836	0.869443	98292.2	612761	2	8
22	Beta-Alanine	23 Beta-Alanine	C3H7NO2	[M+H]+	9.8	10.5	15	0.2	90.055	90.0554	4.9	S21008	10.05	9.93	10.3	0.37	1282898	1003352	993650	1109550	1677376	1418217	1507336	1672231	45282	40567	55615	41227	59960	39751	60544	44760	0.00225253	443.946	1.09736e+06	1568790	-0.515612	0.699496	155390	1.33308e+06	846	8
23	Betaine	24 Betaine	C5H11NO2	[M+H]+	7	8.2	15	0.2	118.086	118.086	0.4	S21008	7.87	7.8	7.87	0.07	531556096	307210912	407607744	412264640	399992288	429124192	360904224	502538688	946404	956435	1042694	929935	999649	977086	1163093	979891	0.882061	1.13371	414659848	423139848	-0.0292062	0.979959	3.0082e+06	418899848	485	8
24	Butyrylcarnitine	25 Butyrylcarnitine	C11H21NO4	[M+H]+	4.2	6.2	15	0.2	232.154	232.154	-2.3	S21006	5.62	5.45	5.79	0.34	661058	670327	502734	641074	926790	576343	600695	781433	11304	8741	10512	10198	8837	9698	7868	9525	0.303924	3.29029	618798	721315	-0.221161	0.857875	38756.1	670057	3	8
25	Carbamoyl phosphate	26 Carbamoyl phosphate	CH4NO5P	[M-H]-	27	30	15	0.2	139.975	139.975	-6	S21001	27.01	27	27.13	0.13	188475	68768	43846	33288	26090	36281	27687	25639.4	4132	1765	10814	3728	10339	1902	7167	1858	0.177897	5.62122	83594.2	28924.3	1.53112	2.8901	25639.4	56259.3	1	7
26	Carnosine	27 Carnosine	C9H14N4O3	[M+H]+	10.6	12.6	15	0.2	227.114	227.113	-2.9	S21006	11.93	11.86	12.08	0.21	351680	378755	258268	297524	314576	216114	262688	347172	20066	5998	15289	0	27889	0	25061	8647	0.392354	2.54872	321557	285138	0.173416	1.12773	48606.2	303347	1	8
27	CDP	28 CDP	C9H15N3O11P2	[M+H]+	13	15	15	0.2	404.026	404.024	-3.6	S21008	14.16	14.15	14.34	0.19	162031	188370	107440	119017	267903	264623	140743	290863	9838	0	53384	10508	28414	6588	67135	11526	0.0468619	21.3393	144214	241033	-0.741014	0.598318	80272.4	192624	7	8
28	Choline	29 Choline	C5H14NO	[Cat]+	11	15	15	0.2	104.107	104.107	2	S21008	14.99	14.98	15	0.02	88324544	127334872	115434224	154748624	136486352	85894592	89209960	121824272	864319	185605	463481	104110	869305	159474	803991	181097	0.505913	1.97662	121460566	108353794	0.164738	1.12096	1.37177e+06	114907180	255	8
29	cis-Aconitic acid	30 cis-Aconitic acid	C6H6O6	[M-H]-	14.1	16.1	15	0.2	173.009	173.008	-5.6	S21006	15.16	15.12	15.22	0.11	14539459	11723328	11588687	11503999	24659496	21503196	21223552	24423250	3099624	58699	2432993	42860	2335246	41749	2003900	41924	0.000104554	9564.4	1.23389e+07	2.29524e+07	-0.895433	0.537586	3.78137e+06	1.76456e+07	313940	8
30	Citric acid	31 Citric acid	C6H8O7	[M-H]-	14.2	16.2	15	0.2	191.02	191.019	-3.8	S21008	15.34	15.22	15.58	0.36	135032592	125427984	134264256	111514384	279660224	219259248	214722416	284121888	3288378	230298	41312368	1120421	48277864	1181936	61168332	1906587	0.000756774	1321.4	126559804	249440944	-0.978879	0.507374	59442319	188000374	489626	8
31	Citrulline	32 Citrulline	C6H13N3O3	[M+H]+	10.9	12.9	15	0.2	176.103	176.103	-1.5	S21001	12.2	12.17	12.23	0.06	123621472	115319920	112174616	112477840	54047740	42480584	47601208	50649192	2461791	1123530	2640908	1159458	3978051	1391586	3582516	1425102	1.59309e-06	627709	115898462	48694681	1.25103	2.38011	6.6711e+06	8.22966e+07	122952270	8
32	Creatine	33 Creatine	C4H9N3O2	[M+H]+	10	11.5	15	0.2	132.077	132.077	-1.2	S21008	10.95	10.91	10.99	0.08	2658000	1535524	2195480	2038054	2238251	2196778	1943927	3607042	394898	376050	410814	400252	393449	367920	401631	369323	0.411232	2.43172	2.10676e+06	2.4965e+06	-0.244878	0.843887	1.17788e+06	2301632	7	8
33	Creatinine	34 Creatinine	C4H7N3O	[M+H]+	5.2	7.2	15	0.2	114.066	114.066	0.1	S21006	6.46	6.42	6.48	0.07	75228848	76039928	61681652	68857920	93852304	62265880	70839344	78507480	441152	358969	349774	373880	380130	371483	362266	366083	0.459819	2.17477	70452087	76366252	-0.116293	0.922555	1.1364e+06	7.34092e+07	173	8
34	Cyclic AMP	35 Cyclic AMP	C10H12N5O6P	[M-H]-	5.8	7.8	15	0.2	328.045	328.044	-2.9	S21019	6.06	5.84	6.16	0.32	157409	53796	243881	200165	148582	192253	184814	233787	2271	2139	0	0	2084	0	2269	0	0.577943	1.73027	163813	189859	-0.212881	0.862813	13286.1	176836	0	8
35	Cytidine	36 Cytidine	C9H13N3O5	[M+H]+	7.1	9.1	15	0.2	244.093	244.092	-1.6	S21009	8.35	8.32	8.42	0.1	5572136	5721322	4494207	4768076	9205926	6642736	7093325	8067946	92998	24123	63794	18793	49498	14446	25509	19837	0.00660582	151.382	5.13894e+06	7.75248e+06	-0.593189	0.662876	125874	6.44571e+06	1472	8
36	Cytidine monophosphate	37 Cytidine monophosphate	C9H14N3O8P	[M+H]+	11.8	13.8	15	0.2	324.059	324.058	-3.2	S21006	12.9	12.83	13	0.17	3181286	2629604	2694252	2959538	2276708	1680094	2128648	1934964	109271	3811	99234	11496	120505	6214	161247	11668	0.00313489	318.99	2866170	2.0051e+06	0.515447	1.42944	206292	2.43564e+06	1111	8
37	Cytidine triphosphate	38 Cytidine triphosphate	C9H16N3O14P3	[M-H]-	15	20	15	0.2	481.977	481.976	-3	S21014	15.56	15.37	15.79	0.42	12384.6	12384.6	12384.6	12384.6	13852	13014	12384.6	22274	0	0	0	0	0	0	6359	0	0.243505	4.10668	12384.6	15381.2	-0.312614	0.805182	12384.6	13882.9	0	3
38	Cytosine	39 Cytosine	C4H5N3O	[M+H]+	9	11	15	0.2	112.05	112.051	0.5	S21008	9.52	9.28	9.75	0.47	256205	256205	256205	256205	256205	256205	256205	256205	86105	86397	82881	79058	80082	73147	78192	90684	NA	NA	256205	256205	0	1	256205	256205	0	0
39	D-2-Hydroxyglutaric acid	40 D-2-Hydroxyglutaric acid	C5H8O5	[M-H]-	11.6	13.6	15	0.2	147.03	147.029	-6.8	S21007	12.43	12.35	12.44	0.09	3096292	4602463	3927273	4671038	9245244	6492142	4201001	9242247	125172	50664	81566	44673	82040	61818	110623	59284	0.0445896	22.4268	4.07427e+06	7.29516e+06	-0.840399	0.558489	240940	5.68471e+06	228	8
40	D-Glucose	41 D-Glucose	C6H12O6	[M-H]-	9	11	15	0.2	179.056	179.055	-4	S21008	10.21	9.99	10.22	0.23	16556572	10806419	14425153	13865060	13915599	10637826	8114608	17171040	22103	15606	19496	14432	21361	19981	20280	21273	0.550527	1.81644	13913301	1.24598e+07	0.159188	1.11666	67949.5	1.31865e+07	27	8
41	D-Glyceraldehyde 3-phosphate	42 D-Glyceraldehyde 3-phosphate	C3H7O6P	[M-H]-	13	14	15	0.2	168.991	168.991	-0.3	S21014	13.15	13.03	13.32	0.3	40541	21301.8	22186	21301.8	44478	51761	66097	55487	6663	0	7332	0	7243	0	5314	3586	0.00508792	196.544	26332.6	54455.8	-1.04823	0.48356	21301.8	40394.2	16	6
42	Dihydrofolic acid	43 Dihydrofolic acid	C19H21N7O6	[M+H]+	13	16	15	0.2	444.163	444.161	-3.2	S21006	15.9	15.68	15.9	0.22	16054.8	16054.8	16054.8	16054.8	16054.8	16054.8	16054.8	16054.8	0	5131	0	3233	0	2977	4805	0	NA	NA	16054.8	16054.8	0	1	16054.8	16054.8	0	0
43	Dihydroxyacetone phosphate	44 Dihydroxyacetone phosphate	C3H7O6P	[M-H]-	12	13	15	0.2	168.991	168.99	-5	S21014	12.44	12.34	12.55	0.21	2442026	93983	419062	91182	1943636	3522673	6584198	3535930	9913	0	15275	2089	21946	0	17421	0	0.0315461	31.6996	761563	3.89661e+06	-2.35518	0.195443	34991.5	2.32909e+06	378	8
44	D-Ribose 5-phosphate	45 D-Ribose 5-phosphate	C5H11O8P	[M-H]-	12.4	13.8	15	0.2	229.012	229.011	-2.1	S21006	12.74	12.69	12.98	0.28	6679558	6511872	6490988	7202386	4418359	3895036	3947741	4059690	112365	2790	159821	8509	337655	7293	300434	10312	1.28682e-05	77711.2	6721201	4.08021e+06	0.720077	1.64727	362192	5.4007e+06	691352	8
45	D-Sedoheptulose 7-phosphate	46 D-Sedoheptulose 7-phosphate	C7H15O10P	[M-H]-	12.2	14.2	15	0.2	289.033	289.033	-1.1	S21006	13.29	13.25	13.44	0.19	2136508	2340922	1480298	2895684	1816524	1122640	1272036	1256805	55239	2490	74746	8105	59994	8855	180934	8947	0.0427094	23.4141	2213353	1.367e+06	0.695219	1.61913	159741	1.79018e+06	68	8
46	dTDP	47 dTDP	C10H16N2O11P2	[M-H]-	11	13	15	0.2	401.016	401.014	-5.1	S21004	11.74	11.59	11.85	0.26	72952	70677	81900	121097	117761	66100	53536	79500	5252	0	10544	0	10740	2590	10027	3431	0.696977	1.43477	86656.5	79224.2	0.129366	1.09381	25969	82940.4	0	8
47	FAD	48 FAD	C27H33N9O15P2	[M+H]+	7.6	9.6	15	0.2	786.164	786.162	-3.3	S21006	8.77	8.58	8.82	0.23	112020	127227	89345	123130	77860	53528	42782	66949	0	0	0	0	0	0	0	0	0.00368491	271.377	112930	60279.8	0.90569	1.87344	10000	86605.1	44	8
48	Folic acid	49 Folic acid	C19H19N7O6	[M+H]+	13	16	15	0.2	442.147	442.152	10.9	S21001	13.37	13.13	13.53	0.39	27887	10596	14350	10000	10000	10000	10000	10000	0	0	0	0	0	0	0	0	0.220281	4.53966	15708.2	10000	0.651522	1.57082	10000	12854.1	0	3
49	Fructose 1,6-bisphosphate	50 Fructose 1,6-bisphosphate	C6H14O12P2	[M-H]-	14.1	16.1	15	0.2	338.989	338.988	-3.5	S21008	15.34	15.19	15.58	0.39	116380	115704	420564	156003	387823	924943	393682	1782374	4508	0	61567	6218	23950	2684	173764	9185	0.0936229	10.6811	202163	872206	-2.10915	0.231783	115704	537184	25	7
50	Fructose 6-phosphate	51 Fructose 6-phosphate	C6H13O9P	[M-H]-	12.6	13.5	15	0.2	259.022	259.022	-1.7	S21006	13.24	13.01	13.31	0.3	4494516	1833216	2807036	3921001	6776036	6335365	8019838	7575694	544371	19943	441880	20892	368272	17791	512615	24471	0.00143107	698.779	3.26394e+06	7.17673e+06	-1.13671	0.454795	741338	5.22034e+06	8021	8
51	Fumaric acid	52 Fumaric acid	C4H4O4	[M-H]-	12.2	14.2	15	0.2	115.004	115.002	-11.2	S21006	13.17	13.17	13.31	0.14	8150326	7280081	6155558	7994624	11972530	8804581	9158658	10059481	499656	28718	127334	18410	73472	24826	55744	15976	0.0213427	46.8545	7.39515e+06	9.99881e+06	-0.435178	0.739603	326551	8.69698e+06	551	8
52	Glucose 6-phosphate	53 Glucose 6-phosphate	C6H13O9P	[M-H]-	13.6	14.4	15	0.2	259.022	259.022	-0.6	S21008	13.93	13.86	13.93	0.07	15511645	6999394	11052373	11419230	17587192	15895139	16531222	20155136	2419216	42456	2150449	75278	2063197	64791	3781504	118145	0.0189251	52.8399	1.12457e+07	1.75422e+07	-0.641459	0.641064	4.02814e+06	1.43939e+07	1186	8
53	Glutathione	54 Glutathione	C10H17N3O6S	[M+H]+	10	13	15	0.2	308.091	308.09	-3.2	S21001	11.41	11.35	11.45	0.09	61081116	53315432	49344552	52239172	29132480	21589868	23348624	23303422	156551	85576	440535	230308	600120	330924	959870	482096	6.18641e-05	16164.5	53995068	2.43436e+07	1.14929	2.21804	1.24224e+06	3.91693e+07	1404354	8
54	Glycerol 3-phosphate	55 Glycerol 3-phosphate	C3H9O6P	[M-H]-	11.5	13	15	0.2	171.006	171.006	-5.3	S21006	12.06	11.89	12.3	0.41	218922	268906	184114	188256	452674	245763	350617	495312	6834	2385	6586	0	8476	2092	14353	4037	0.0275324	36.3209	215050	386092	-0.844274	0.556991	26786.1	300570	20	8
55	Glycine	56 Glycine	C2H5NO2	[M+H]+	10.7	12.7	15	0.2	76.0393	76.0399	7.8	S21015	11.94	11.92	11.99	0.08	4454935	3835482	3919960	3984922	6533066	5422450	6266732	6768768	282418	142627	302614	161817	351987	145698	378217	148775	0.000506804	1973.15	4.04882e+06	6247754	-0.625834	0.648045	727807	5.14829e+06	15675	8
56	Guanidoacetic acid	57 Guanidoacetic acid	C3H7N3O2	[M+H]+	10.7	12.7	15	0.2	118.061	118.061	0.8	S21008	12.01	11.95	12.04	0.09	2845724	1320204	2412496	2123670	2492074	2822515	2571302	3354628	54245	17365	71111	22964	54439	22980	131280	27184	0.142216	7.03156	2.17552e+06	2.81013e+06	-0.369274	0.774172	160588	2.49283e+06	23	8
57	Guanine	58 Guanine	C5H5N5O	[M+H]+	7.7	9.7	15	0.2	152.057	152.056	-1.2	S21016	8.67	8.6	8.9	0.3	34319652	29645062	36574040	41075204	38444284	36707104	35879156	36102884	164034	47535	209126	50056	272436	57326	158621	56603	0.593417	1.68516	3.54035e+07	36783357	-0.0551616	0.962487	390901	3.60934e+07	63	8
58	Guanosine	59 Guanosine	C10H13N5O5	[M+H]+	7.7	9.7	15	0.2	284.099	284.098	-3	S21013	9.03	8.91	9.08	0.17	5713625	5201582	5187412	5606839	4569910	4418662	4832050	4547854	84190	16592	78493	12891	76329	11249	56370	7831	0.00206798	483.564	5.42736e+06	4592119	0.241092	1.18189	138979	5.00974e+06	2863	8
59	Guanosine diphosphate	60 Guanosine diphosphate	C10H15N5O11P2	[M-H]-	13.8	15.8	15	0.2	442.017	442.015	-5.6	S21015	15.1	14.99	15.33	0.34	82669	127845	75638	71503.4	97936	101597	71503.4	110856	3872	0	33266	14724	31493	6227	59662	14765	0.709586	1.40927	89413.8	95473.1	-0.094596	0.936534	71503.4	92443.5	0	6
60	Guanosine monophosphate	61 Guanosine monophosphate	C10H14N5O8P	[M+H]+	12.6	14.6	15	0.2	364.065	364.064	-3	S21015	13.73	13.66	13.77	0.11	3696334	3449334	3166818	3653446	2471581	2231234	2250336	2206534	122541	8678	211819	17643	183518	12110	369146	20582	0.000114467	8736.18	3491483	2.28992e+06	0.608542	1.52472	364764	2.8907e+06	38505	8
61	Guanosine triphosphate	62 Guanosine triphosphate	C10H16N5O14P3	[M-H]-	15	17	15	0.2	521.983	521.979	-9.4	S21014	16.6	16.35	16.84	0.49	12914.5	12914.5	12914.5	12914.5	12914.5	12914.5	12914.5	12914.5	0	0	2431	2107	0	0	3234	0	NA	NA	12914.5	12914.5	0	1	12914.5	12914.5	0	0
62	Homocysteine	63 Homocysteine	C4H9NO2S	[M-H]-	7.3	9.3	15	0.2	134.028	134.027	-11.4	S21016	8.5	8.32	8.52	0.2	10000	10000	10000	10000	10000	10000	10000	10000	0	0	0	0	0	0	0	0	NA	NA	10000	10000	0	1	10000	10000	0	0
63	Hypotaurine	64 Hypotaurine	C2H7NO2S	[M+H]+	10	12	15	0.2	110.027	110.026	-5.7	S21012	11.02	10.85	11.25	0.4	40811	42278	54671	39722	53927	44136	43946	62385	0	0	0	0	0	0	4990	0	0.276832	3.6123	44370.5	51098.5	-0.20368	0.868333	11871.2	47734.5	0	8
64	Hypoxanthine	65 Hypoxanthine	C5H4N4O	[M+H]+	5.8	7.8	15	0.2	137.046	137.046	-2.1	S21019	6.92	6.86	7	0.14	216144288	227251536	209111792	248242736	260949024	223480256	244340208	241829824	561440	129832	470799	139704	725246	156424	577781	150168	0.179099	5.58352	225187588	242649828	-0.107749	0.928035	1.10177e+06	233918708	1407	8
65	Inosine	66 Inosine	C10H12N4O5	[M+H]+	6.4	8.4	15	0.2	269.088	269.087	-3.1	S21019	7.59	7.5	7.69	0.19	44378672	42725448	40152280	43631900	46315192	38052064	38312152	39930248	80159	0	61710	6939	93731	0	74556	8292	0.371023	2.69525	42722075	40652414	0.0716407	1.05091	132020	4.16872e+07	118	8
66	Inosinic acid	67 Inosinic acid	C10H13N4O8P	[M+H]+	11.4	13.4	15	0.2	349.054	349.053	-3.1	S21002	12.56	12.51	12.77	0.25	784255	1226088	764353	811644	296862	164057	155597	251520	14359	4217	14756	5757	21775	0	28592	3803	0.00106766	936.628	896585	217009	2.04669	4.13156	44972.1	556797	2155	8
67	L-Acetylcarnitine	68 L-Acetylcarnitine	C9H17NO4	[M+H]+	6.3	8.3	15	0.2	204.123	204.123	-2.1	S21006	7.57	7.47	7.6	0.12	1356361088	1381872640	1177530496	1313142784	1232084352	889566464	816027008	1023764160	178312	25552	272093	54627	317282	52871	395040	52166	0.0209719	47.6829	1307226752	990360496	0.400484	1.31995	515479	1148793624	72304	8
68	L-Alanine	69 L-Alanine	C3H7NO2	[M+H]+	10.6	11.2	15	0.2	90.055	90.0553	3.8	S21013	11.06	11.03	11.09	0.06	81039768	69166024	66069772	69489224	123458232	98886864	102018296	109506528	1947715	837478	2501886	843669	2410774	807253	2155295	920619	0.00115213	867.955	71441197	108467480	-0.602434	0.658642	4.66926e+06	8.99543e+07	118541	8
69	L-Arginine	70 L-Arginine	C6H14N4O2	[M+H]+	18.5	21	15	0.2	175.119	175.119	-1.4	S21009	20.17	20.17	20.4	0.23	984592960	979015296	888694912	943977024	1081923712	985093504	955736384	1050968640	343338752	94952224	403437632	139260144	443666752	151799808	434235200	140715408	0.105906	9.44231	949070048	1018430560	-0.101761	0.931895	806787220	983750304	9968	8
70	L-Asparagine	71 L-Asparagine	C4H8N2O3	[M+H]+	10.3	12.3	15	0.2	133.061	133.06	-2	S21009	11.64	11.57	11.67	0.1	18034802	15964195	16659570	14967322	31864368	23917548	25127028	28617470	465822	79669	804152	91739	708635	90980	847160	112751	0.00120222	831.792	1.64065e+07	2.73816e+07	-0.738942	0.599179	1.21034e+06	2.1894e+07	30394	8
71	L-Aspartic acid	72 L-Aspartic acid	C4H7NO4	[M-H]-	10.8	12.8	15	0.2	132.03	132.029	-8.6	S21016	11.93	11.89	11.97	0.08	159893472	153973296	139081984	142682368	165725504	131286312	138745760	149103296	4493281	432247	4942630	531045	5041587	569639	6527054	580120	0.772317	1.2948	148907780	146215218	0.0263257	1.01842	8.6791e+06	147561499	195	8
72	L-Carnitine	73 L-Carnitine	C7H16NO3	[Cat]+	8.3	10.3	15	0.2	162.113	162.112	-1.7	S21016	9.7	9.67	9.72	0.06	395927296	463056576	348904224	411155552	495373920	351170560	330131616	441606304	415471	89678	456456	109360	674818	93909	686349	105283	0.996786	1.00322	404760912	404570600	0.000678491	1.00047	996746	404665756	406	8
73	L-Cystathionine	74 L-Cystathionine	C7H14N2O4S	[M+H]+	12.2	14.2	15	0.2	223.075	223.074	-1.4	S21016	13.44	13.44	13.6	0.16	5747194	5536890	4986348	4516238	4445644	3930406	3696844	4437027	230414	10602	407845	40081	346000	30614	405386	34863	0.0188174	53.1423	5.19667e+06	4.12748e+06	0.332325	1.25904	574677	4.66207e+06	312	8
74	L-Cysteine	75 L-Cysteine	C3H7NO2S	[M+H]+	13	17	15	0.2	122.027	122.027	-1.9	S21002	16.9	16.76	16.99	0.23	27852	39674	32067	29458	36514	25941.2	27165	35503	5856	4652	7184	3840	6503	4260	5320	4895	0.804549	1.24293	32262.8	31280.8	0.0445914	1.03139	25941.2	31771.8	0	7
75	L-Cystine	76 L-Cystine	C6H12N2O4S2	[M-H]-	11.7	13.7	15	0.2	239.017	239.015	-4.9	SQ989_Blank_5	12.94	12.69	13	0.31	20905	20905	20905	20905	20905	20905	20905	20905	5037	0	5212	4215	0	6719	3348	4549	NA	NA	20905	20905	0	1	20905	20905	0	0
76	L-Glutamic acid	77 L-Glutamic acid	C5H9NO4	[M+H]+	10	13	15	0.2	148.06	148.06	-2.3	S21007	11.68	11.59	11.7	0.11	654928256	638335168	593272768	626465536	578889472	472827488	477245696	517205824	17245526	821533	18847084	1184088	19974700	1164571	27229938	1723148	0.00571009	175.129	628250432	511542120	0.296487	1.22815	3.30815e+07	569896276	122576	8
77	L-Glutamine	78 L-Glutamine	C5H10N2O3	[M+H]+	10.1	12.1	15	0.2	147.076	147.076	-2.2	S21013	11.4	11.35	11.47	0.12	559668864	504041248	500403552	506203264	945035328	810878144	817039168	855502336	30092348	683117	44805924	1354054	38158496	1259683	30336682	1421964	5.81791e-05	17188.3	517579232	857113744	-0.727707	0.603863	5.55521e+07	687346488	19564557	8
78	L-Histidine	79 L-Histidine	C6H9N3O2	[M+H]+	9.9	11.9	15	0.2	156.077	156.077	-1.6	S21015	10.94	10.92	11.18	0.25	469274720	499700864	454575552	392796160	470433856	401663328	438224160	488596192	6630341	661024	20692758	2072504	31607652	2755984	26378404	2948461	0.887449	1.12683	454086824	449729384	0.013911	1.00969	35165173	451908104	514	8
79	L-Isoleucine	80 L-Isoleucine	C6H13NO2	[M+H]+	6	7.5	15	0.2	132.102	132.102	-1.6	S21014	7.38	7.33	7.41	0.08	218774416	182620304	178196272	189743792	348944608	285118240	278293120	330655136	1178276	916923	1277192	870757	1309576	946878	1410010	986914	0.000906639	1102.97	192333696	310752776	-0.692156	0.618928	3.3462e+06	251543236	448268	8
80	L-Kynurenine	81 L-Kynurenine	C10H12N2O3	[M+H]+	6	8	15	0.2	209.092	209.091	-2.7	S21002	7.37	7.27	7.4	0.13	16761823	17676076	14708108	16886976	15755021	11836123	12191579	13522433	52930	30473	50235	29810	57993	38494	49057	37074	0.026659	37.5108	1.65082e+07	13326289	0.308912	1.23877	139775	1.49173e+07	693	8
81	L-Lactic acid	82 L-Lactic acid	C3H6O3	[M-H]-	6.2	8.2	15	0.2	89.0244	89.0233	-12.6	S21014	7.04	7	7.08	0.08	4.70597e+06	4.70597e+06	4.70597e+06	4.70597e+06	4.70597e+06	4.70597e+06	4.70597e+06	4.70597e+06	1602657	1562534	1573654	1573948	1541684	1524426	1501105	1642578	NA	NA	4.70597e+06	4.70597e+06	0	1	4.70597e+06	4.70597e+06	0	0
82	L-Leucine	83 L-Leucine	C6H13NO2	[M+H]+	7.5	9	15	0.2	132.102	132.102	-1.6	S21013	7.45	7.45	7.7	0.25	151413088	106935592	134880608	136370080	293910432	219643360	211139728	253075392	742976	605004	919731	579753	1040047	654485	957289	665967	0.00175683	569.209	132399842	244442228	-0.884592	0.541641	2.32197e+06	188421035	198011	8
83	L-Lysine	84 L-Lysine	C6H14N2O2	[M+H]+	18	20	15	0.2	147.113	147.113	-2.1	S21009	19.21	19.17	19.34	0.17	466568256	468098272	443011488	429620128	539749248	460989248	429865440	513335584	124107856	14626129	159557648	24295790	190818784	30850518	148514592	23676322	0.245801	4.06833	451824536	485984880	-0.105149	0.929709	2.68678e+08	468904708	2052	8
84	L-Malic acid	85 L-Malic acid	C4H6O5	[M-H]-	12.2	14.2	15	0.2	133.014	133.013	-9.4	S21006	13.17	13.16	13.25	0.09	89831560	82190320	66374648	89165104	131392064	91267000	100969824	113115608	7883238	1124152	3543334	718963	4242227	836038	2467080	497144	0.0370168	27.0148	81890408	109186124	-0.415023	0.750007	8002066	95538266	3441	8
85	L-Methionine	86 L-Methionine	C5H11NO2S	[M+H]+	6.8	8.8	15	0.2	150.058	150.058	-1.5	S21009	8.06	7.97	8.11	0.14	170829680	167599152	146296240	157925936	254079552	188057280	202140512	225673392	266568	64675	279574	82240	381054	83512	262339	99568	0.0104234	95.9382	160662752	217487684	-0.436898	0.738721	579824	189075218	24555	8
86	L-Phenylalanine	87 L-Phenylalanine	C9H11NO2	[M+H]+	5.6	7.6	15	0.2	166.086	166.086	-1.5	S21015	6.81	6.76	6.86	0.1	299060416	254319392	242790944	272902592	512718272	394060064	396629952	476037728	1109886	836541	1188137	878140	1230040	943485	1301431	981271	0.00144786	690.675	267268336	444861504	-0.735067	0.60079	3.18585e+06	356064920	409337	8
87	L-Proline	88 L-Proline	C5H9NO2	[M+H]+	7.9	9.9	15	0.2	116.071	116.071	0.8	S21009	9.22	9.18	9.24	0.07	486158720	504388448	466314528	507188672	723803584	554443328	607614272	635129344	7075474	5678172	7338664	5607189	8124797	5706298	7899396	6109093	0.00896615	111.531	491012592	630247632	-0.360159	0.779079	2.00872e+07	560630112	80258	8
88	L-Serine	89 L-Serine	C3H7NO3	[M+H]+	10.8	12.8	15	0.2	106.05	106.05	2.2	S21015	12.07	12.04	12.09	0.05	26455344	24079814	21725256	22584784	39345336	31080982	34335844	36480556	1532604	974497	1969294	899836	2014806	956194	1906231	1042765	0.00123885	807.201	2.37113e+07	3.53107e+07	-0.57453	0.671505	4.24609e+06	2.9511e+07	35474	8
89	L-Threonine	90 L-Threonine	C4H9NO3	[M-H]-	9.5	11.5	15	0.2	118.051	118.05	-10.7	S21014	10.84	10.77	10.88	0.12	15979350	14401182	12157439	13880629	30266720	22902180	26633650	28075214	874314	198477	915581	232416	1038527	251586	998930	283930	0.000311036	3215.06	14104650	26969441	-0.935155	0.522986	1.80766e+06	2.0537e+07	126251	8
90	L-Tryptophan	91 L-Tryptophan	C11H12N2O2	[M+H]+	6.8	8.8	15	0.2	205.097	205.097	-1.7	S21013	8.13	8.08	8.19	0.11	19016468	14570385	15284980	16807384	30355748	24135506	23688494	27851232	122046	97306	141409	117412	158508	104472	149194	99368	0.00165474	604.324	1.64198e+07	26507745	-0.690977	0.619434	381143	2.14638e+07	20940	8
91	L-Tyrosine	92 L-Tyrosine	C9H11NO3	[M+H]+	8.2	10.2	15	0.2	182.081	182.081	-1.5	S21013	9.47	9.4	9.52	0.12	77650496	71396976	65917808	71663760	137591488	111802760	112495024	125990576	1200096	593354	1266230	660915	1540388	675272	1556278	741804	0.000265045	3772.95	71657260	121969962	-0.767341	0.587499	3.09788e+06	96813611	621741	8
92	L-Valine	93 L-Valine	C5H11NO2	[M+H]+	8.3	9.2	15	0.2	118.086	118.086	0.4	S21013	8.96	8.89	8.97	0.07	187044240	174902496	156845088	175814688	302746912	242807904	254720080	277012800	1725438	1004749	1839931	1019150	1868688	1089140	1849842	1031537	0.000606238	1649.52	173651628	269321924	-0.633136	0.644773	4.29568e+06	221486776	566627	8
93	N6-Acetyl-L-lysine	94 N6-Acetyl-L-lysine	C8H16N2O3	[M+H]+	1.9	3.9	15	0.2	189.123	189.122	-8.8	S21016	2.92	2.86	2.96	0.1	2117628	1.56149e+06	1.56149e+06	1.56149e+06	1.56149e+06	1.56149e+06	1.56149e+06	1.56149e+06	519447	546931	454369	476753	532686	465946	539709	601453	0.355918	2.80964	1.70052e+06	1.56149e+06	0.123058	1.08904	1.56149e+06	1.631e+06	5	1
94	N-Acetylglutamic acid	95 N-Acetylglutamic acid	C7H11NO5	[M+H]+	10.3	12.3	15	0.2	190.071	190.071	-2.1	S21014	11.32	11.1	11.4	0.3	3720366	3129967	2994724	3022174	1939918	1331984	1768990	1707769	19201	10008	15241	14388	19696	10615	20486	14596	0.000370401	2699.78	3.21681e+06	1.68717e+06	0.931028	1.90663	56586.6	2.45199e+06	12622	8
95	N-Acetylglutamine	96 N-Acetylglutamine	C7H12N2O4	[M-H]-	6.8	8.8	15	0.2	187.072	187.072	-4.4	S21014	7.9	7.73	8.08	0.34	3987010	3628364	2672238	3153185	10408430	7878704	8513031	8920449	4318	2676	4428	4706	2986	2742	3508	4128	9.5844e-05	10433.6	3.3602e+06	8.93015e+06	-1.41014	0.376276	21059.5	6.14518e+06	170398	8
96	N-Acetyl-L-alanine	97 N-Acetyl-L-alanine	C5H9NO3	[M+H]+	6	7	15	0.2	132.065	132.065	-1.7	S21002	6.47	6.39	6.71	0.32	1073726	1153480	939896	1132374	591113	473563	388814	484754	34542	29647	51234	33858	54394	44618	51017	37509	8.74738e-05	11432	1074869	484561	1.14941	2.21823	136307	779715	19773	8
97	N-Acetyl-L-methionine	98 N-Acetyl-L-methionine	C7H13NO3S	[M+H]+	3	5	15	0.2	192.069	192.069	-1.5	S21014	4.27	4.02	4.49	0.47	340883	332024	223129	272602	391605	230706	297431	306951	11817	0	10147	12177	9571	7648	10866	10880	0.747174	1.33838	292160	306673	-0.0699461	0.952674	37414.8	299416	0	8
98	N-Acetyl-L-phenylalanine	99 N-Acetyl-L-phenylalanine	C11H13NO3	[M+H]+	2.8	4	15	0.2	208.097	208.096	-1.5	S21015	3.28	3.21	3.3	0.08	1022736	1026952	968940	968940	1163853	968940	968940	1022941	332418	292556	305775	358326	302228	357741	297255	310874	0.508575	1.96628	996892	1.03117e+06	-0.048771	0.96676	968940	1.01403e+06	2	4
99	N-Acetylornithine	100 N-Acetylornithine	C7H14N2O3	[M+H]+	8.6	10.6	15	0.2	175.108	175.107	-1.3	S21009	10.03	9.87	10.05	0.18	6625530	7334833	5930022	7305522	11651595	7677232	8910203	8887991	79802	62809	89659	54429	116244	61671	107254	55244	0.0334867	29.8626	6.79898e+06	9.28176e+06	-0.44908	0.73251	245167	8040366	328	8
100	N-Acetylserine	101 N-Acetylserine	C5H9NO4	[M-H]-	7.5	8.5	15	0.2	146.046	146.045	-7.4	S21013	8.02	7.92	8.06	0.14	1620954	1288334	1213562	1269152	2990554	2350017	2430703	2771430	41696	42090	43900	39717	55249	37327	47637	38323	0.000329504	3034.87	1.348e+06	2635676	-0.967352	0.511444	139727	1.99184e+06	11819	8
101	NAD	102 NAD	C21H28N7O14P2	[Cat]+	9.9	11.9	15	0.2	664.116	664.114	-3	S21002	10.98	10.86	11.03	0.16	5641429	8322845	3725593	5396338	5960702	1344777	1620730	3873872	65922	0	68183	0	38649	0	222099	0	0.12426	8.04767	5.77155e+06	3.20002e+06	0.850878	1.8036	158070	4.48579e+06	65	8
102	NADH	103 NADH	C21H29N7O14P2	[M-H]-	9.5	11.5	15	0.2	664.117	664.114	-5.3	S21015	10.55	10.53	10.75	0.23	180145	19355	10000	27291	25827	30133	55980	78093	0	0	0	0	0	0	0	0	0.791373	1.26363	59197.8	47508.2	0.317364	1.24605	10000	53353	0	7
103	NADP	104 NADP	C21H29N7O17P3	[Cat]+	12.7	14.7	15	0.2	744.083	744.08	-3.4	S21008	13.92	13.89	14.13	0.25	382590	420304	298619	345417	307981	264274	201659	261068	7464	4541	28007	5062	22734	4122	47833	4296	0.0230039	43.471	361732	258746	0.483389	1.39802	56522.1	310239	19	8
104	NADPH	105 NADPH	C21H30N7O17P3	[M-H]-	13	15	15	0.2	744.084	744.085	2	S21011	14.46	14.3	14.6	0.3	10000	10000	10000	10000	10000	10000	10000	10000	0	0	0	0	0	0	0	0	NA	NA	10000	10000	0	1	10000	10000	0	0
105	Niacinamide	106 Niacinamide	C6H6N2O	[M+H]+	3.3	5.3	15	0.2	123.055	123.055	0.1	SQ989_Blank_4	4.42	4.36	4.45	0.08	1.07034e+07	1.07034e+07	1.07034e+07	1.07034e+07	1.07034e+07	1.07034e+07	1.07034e+07	1.07034e+07	3671734	2947974	3893300	3335005	4257630	3291484	3803460	3315160	NA	NA	1.07034e+07	1.07034e+07	0	1	1.07034e+07	1.07034e+07	0	0
106	Nicotinic acid	107 Nicotinic acid	C6H5NO2	[M-H]-	5.5	7.5	15	0.2	122.025	122.023	-11.9	S21008	5.47	5.47	5.71	0.24	68305	35428	84155	86226	72590	60199	55545	67903	7991	4211	12122	9266	12430	6896	7097	7795	0.729685	1.37045	68528.5	64059.2	0.0972972	1.06977	35428	66293.9	0	7
107	O-Phosphoethanolamine	108 O-Phosphoethanolamine	C2H8NO4P	[M+H]+	11.4	13.4	15	0.2	142.026	142.026	-0.5	S21002	12.74	12.62	12.9	0.28	58323	59421	53426	45292	50094	35374	37260	52462	3982	0	4341	0	4371	0	8401	0	0.105659	9.46443	54115.5	43797.5	0.305193	1.23558	17910.6	48956.5	1	8
108	Ornithine	109 Ornithine	C5H12N2O2	[M+H]+	17	19	15	0.2	133.097	133.097	-1.2	S21006	17.59	17.54	17.78	0.24	42865640	44555364	40115024	47977420	42924520	38299996	35139200	37904928	9525285	1227486	13375504	2601702	15679397	2744050	21367018	3753625	0.0606588	16.4856	43878362	38567161	0.186137	1.13771	2.63628e+07	4.12228e+07	773	8
109	Orotic acid	110 Orotic acid	C5H4N2O4	[M-H]-	6.7	8.7	15	0.2	155.01	155.009	-7.3	S21013	7.57	7.47	7.68	0.22	4785078	4425946	3894072	4789272	246418	195225	317451	222529	0	2821	0	0	2514	0	3588	1994	1.05222e-06	950374	4473592	245406	4.18819	18.2294	14093.9	2.3595e+06	40877660	8
110	Orotidylic acid	111 Orotidylic acid	C10H13N2O11P	[M+H]+	0	30	15	0.2	369.033	369.036	7.1	S21008	11.11	11.11	11.11	0	10000	10000	10000	10000	10000	10000	10000	10000	0	0	0	0	0	0	0	0	NA	NA	10000	10000	0	1	10000	10000	0	0
111	Oxidized glutathione	112 Oxidized glutathione	C20H32N6O12S2	[M+H]+	13.5	15.5	15	0.2	613.159	613.158	-2.4	S21014	14.63	14.63	14.73	0.1	7982562	8208834	8312048	8200242	6032252	5590361	4243906	6146970	250303	35124	532200	122175	486176	162684	716315	228545	0.000927233	1078.48	8.17592e+06	5.50337e+06	0.571065	1.48562	960071	6.83965e+06	10959	8
112	Oxoadipic acid	113 Oxoadipic acid	C6H8O5	[M-H]-	7.5	9.5	15	0.2	159.03	159.029	-5	S21015	7.7	7.58	7.94	0.37	22166.9	22166.9	22166.9	22166.9	22166.9	22166.9	22166.9	22166.9	5565	4482	3404	4246	3046	2587	3224	5891	NA	NA	22166.9	22166.9	0	1	22166.9	22166.9	0	0
113	Oxoglutaric acid	114 Oxoglutaric acid	C5H6O5	[M-H]-	10.8	14.8	15	0.2	145.014	145.013	-7.2	S21007	12.74	12.5	12.78	0.27	5458572	6369400	4929423	5118805	8525867	6328204	6361942	7118230	25326	17754	30965	14326	21311	19744	44079	20439	0.0371712	26.9026	5469050	7.08356e+06	-0.373185	0.772076	82729	6.27631e+06	219	8
114	Palmitic acid	115 Palmitic acid	C16H32O2	[M-H]-	1.6	3.6	15	0.2	255.233	255.232	-2.2	S21008	2.6	2.53	2.66	0.13	42389560	23467902	75342616	40701824	19957704	19416142	30023754	63284844	583021	527186	545430	520455	665445	480293	1245635	462329	0.442527	2.25975	4.54755e+07	33170611	0.455183	1.37096	1.89617e+06	3.9323e+07	122	8
115	Pantothenic acid	116 Pantothenic acid	C9H17NO5	[M+H]+	5.1	7.1	15	0.2	220.118	220.118	-2	S21007	6.12	5.96	6.25	0.29	22466378	21727958	18822126	21692774	13726694	9917964	10314308	11609648	42492	26050	25209	18167	20757	25997	39248	16045	0.000163881	6102.01	21177309	1.13922e+07	0.894479	1.85894	90236.9	1.62847e+07	184722	8
116	Phenol	117 Phenol	C6H6O	[M-H]-	2.1	4.1	15	0.2	93.0346	93.0334	-12.8	SQ989_Blank_5	3.17	3.14	3.2	0.06	1.71891e+07	1.71891e+07	1.71891e+07	1.71891e+07	1.71891e+07	1.71891e+07	1.71891e+07	1.71891e+07	5772696	5596890	5698050	5676446	5929918	5950799	5532058	5654062	NA	NA	1.71891e+07	1.71891e+07	0	1	1.71891e+07	1.71891e+07	0	0
117	Phosphocreatine	118 Phosphocreatine	C4H10N3O5P	[M-H]-	11.2	13.2	15	0.2	210.029	210.03	6	S21013	12.65	12.55	12.65	0.1	10000	10000	10000	10000	10000	10000	10000	10000	0	0	0	0	0	0	0	0	NA	NA	10000	10000	0	1	10000	10000	0	0
118	Phosphoenolpyruvic acid	119 Phosphoenolpyruvic acid	C3H5O6P	[M-H]-	13.6	15.6	15	0.2	166.975	166.974	-6	S21019	14.74	14.67	14.83	0.16	11828416	11307026	11721967	12635091	14009684	13483761	13925905	14658755	2075505	62554	3969506	333587	5409522	439476	4069373	204346	0.00112791	886.592	11873125	1.40195e+07	-0.239738	0.846899	6.22145e+06	1.29463e+07	13553	8
119	Phosphoribosyl pyrophosphate	120 Phosphoribosyl pyrophosphate	C5H13O14P3	[M-H]-	15	18	15	0.2	388.945	388.941	-10.1	S21007	15.32	15.32	15.57	0.25	10863.6	10863.6	10863.6	10863.6	10863.6	10863.6	10863.6	10863.6	0	0	0	2303	0	0	0	0	NA	NA	10863.6	10863.6	0	1	10863.6	10863.6	0	0
120	Phosphorylcholine	121 Phosphorylcholine	C5H14NO4P	[M+H]+	10	13	15	0.2	184.073	184.073	-1.8	S21007	11.71	11.64	11.74	0.1	111449728	91585432	82325976	100726568	205780304	153602544	166022000	171630448	3057545	61923	4142064	76165	3525888	59629	10642064	145813	0.000899399	1111.85	96521926	174258824	-0.852303	0.5539	8.15166e+06	135390375	271772	8
121	Phosphoserine	122 Phosphoserine	C3H8NO6P	[M+H]+	11.5	13.5	15	0.2	186.016	186.016	0.5	S21018	11.82	11.57	12	0.44	38525.1	38525.1	38525.1	38525.1	38525.1	38525.1	46449	38525.1	10437	6328	11603	7173	14870	7208	18448	0	0.355918	2.80964	38525.1	40506.1	-0.0723393	0.951095	38525.1	39515.6	0	1
122	Pipecolic acid	123 Pipecolic acid	C6H11NO2	[M+H]+	7.5	9.5	15	0.2	130.086	130.086	-1.2	S21008	8.8	8.72	8.86	0.15	9009073	7538573	7108717	8041346	7600596	6090530	6017158	7975302	109825	103956	139458	98499	135636	117080	144663	109914	0.174082	5.7444	7.92443e+06	6.9209e+06	0.195348	1.145	369637	7.42266e+06	49	8
123	Propionylcarnitine	124 Propionylcarnitine	C10H19NO4	[M+H]+	5.2	7.2	15	0.2	218.139	218.138	-2.2	S21006	6.46	6.24	6.61	0.37	25474532	26096670	20442714	23273282	30784128	20051686	19926614	25282210	16452	14213	17114	14787	16525	14620	18883	13066	0.949698	1.05297	2.38218e+07	2.40112e+07	-0.0114227	0.992114	57122.5	2.39165e+07	25	8
124	Pyruvic acid	125 Pyruvic acid	C3H4O3	[M-H]-	5.5	7.5	15	0.2	87.0088	87.0077	-12.3	S21016	5.94	5.79	5.95	0.16	1793133	1461599	1254804	1415344	1191328	1017827	1191688	1131767	29277	31188	33440	28962	39056	28363	40216	28515	0.0274914	36.375	1481220	1.13315e+06	0.386444	1.30717	107131	1.30719e+06	62	8
125	Ribose 1-phosphate	126 Ribose 1-phosphate	C5H11O8P	[M-H]-	11	12.4	15	0.2	229.012	229.011	-2.1	S21019	12.09	12.05	12.11	0.06	4693286	4988012	4508496	5770822	4281272	3784145	3496845	3904150	104110	9873	95871	7823	232052	6885	68788	5220	0.0130444	76.661	4990154	3866603	0.368018	1.29058	208983	4.42838e+06	438	8
126	Saccharopine	127 Saccharopine	C11H20N2O6	[M-H]-	11	14	15	0.2	275.125	275.125	-0.2	S21006	12.61	12.42	12.64	0.23	3728403	4499850	3645748	4567421	9194856	7252628	6071597	7487320	50062	2200	73888	0	86877	0	190420	0	0.00265143	377.156	4.11036e+06	7.5016e+06	-0.867935	0.54793	161293	5.80598e+06	3996	8
127	S-Adenosylhomocysteine	128 S-Adenosylhomocysteine	C14H20N6O5S	[M-H]-	8.6	10.6	15	0.2	383.114	383.12	15.1	S21016	9.4	9.26	9.65	0.39	138439	175038	147471	125051	75980	254688	111863	172728	0	0	0	0	0	0	0	0	0.862644	1.15923	146500	153815	-0.0702957	0.952443	10000	150157	0	8
128	S-Adenosylmethionine	129 S-Adenosylmethionine	C15H22N6O5S	[M+H]+	10.7	12.7	15	0.2	399.144	399.144	-2.5	S21008	12.39	12.35	12.5	0.16	7019414	9039964	7786022	7817352	7935090	6853772	6400200	7823960	639503	20876	1127956	49878	1534090	61046	2428599	76284	0.282076	3.54515	7915688	7.25326e+06	0.126086	1.09133	2236837	7.58447e+06	29	8
129	Sarcosine	130 Sarcosine	C3H7NO2	[M+H]+	11.2	12	15	0.2	90.055	90.0554	4.9	S21014	11.22	11.2	11.23	0.03	22608042	25188824	17533270	17997138	48991568	25272154	29248482	39463164	318196	167575	538822	196853	529419	164960	349976	174893	0.0384285	26.0223	2.08318e+07	35743842	-0.778906	0.582809	925260	2.82878e+07	1263	8
130	Succinic acid	131 Succinic acid	C4H6O4	[M-H]-	11.3	13.3	15	0.2	117.019	117.018	-9.7	S21008	12.41	12.35	12.42	0.07	20613222	24922438	20783738	24491968	15683509	11125011	11498248	16045206	191065	124007	154186	157111	203069	151298	217012	113650	0.00203825	490.617	2.27028e+07	1.3588e+07	0.74054	1.6708	501774	1.81454e+07	14874	8
131	Taurine	132 Taurine	C2H7NO3S	[M-H]-	10.2	12.2	15	0.2	124.007	124.006	-11.2	S21015	11.41	11.27	11.49	0.21	60464	45293.9	55237	55360	55552	51609	56844	72716	10300	14813	13101	9058	10732	10440	13735	11938	0.4005	2.49688	54088.7	59180.2	-0.129788	0.913966	45293.9	56634.5	0	7
132	Thymidine	133 Thymidine	C10H14N2O5	[M-H]-	3.5	5.5	15	0.2	241.083	241.082	-2.9	S21015	4.41	4.18	4.65	0.47	118327	64424	80244	98723	112986	113192	80306	156437	26231	17177	14056	21269	10892	18415	11821	21173	0.241658	4.13808	90429.5	115730	-0.355901	0.781382	62887.8	103080	1	8
133	Uracil	134 Uracil	C4H4N2O2	[M+H]+	5.4	7.4	15	0.2	113.035	113.035	0.4	S21002	6.64	6.51	6.85	0.34	21467642	24317376	19072980	22527970	20006904	14070413	14378086	17317776	20280	10477	15406	14318	17684	18930	16862	9671	0.0226349	44.1796	21846492	1.64433e+07	0.409902	1.3286	56360.5	1.91449e+07	1124	8
134	Ureidopropionic acid	135 Ureidopropionic acid	C4H8N2O3	[M-H]-	10.4	12.4	15	0.2	131.046	131.045	-9.3	S21009	11.63	11.53	11.63	0.1	4395074	3283495	3470244	3225844	11372370	8993680	8680042	10094541	157169	14483	236837	17367	227449	23955	235692	25778	8.90159e-05	11234	3.59366e+06	9.78516e+06	-1.44514	0.367257	362024	6.68941e+06	204621	8
135	Ureidosuccinic acid	136 Ureidosuccinic acid	C5H8N2O5	[M-H]-	12.8	14.8	15	0.2	175.036	175.035	-4.8	S21013	13.88	13.65	14	0.35	126226	128218	109370	97512	28840	23831	15308.1	18929	3791	0	3410	0	0	0	3835	3119	2.12659e-05	47023.6	115332	21727	2.40822	5.3082	15308.1	68529.3	17106	7
136	Uric acid	137 Uric acid	C5H4N4O3	[M+H]+	8.8	10.8	15	0.2	169.036	169.037	8.8	S21012	10.01	10.01	10.01	0	10000	10000	10000	10000	10000	10000	10000	14818	0	0	0	0	0	0	0	0	0.355918	2.80964	10000	11204.5	-0.164078	0.892499	10000	10602.2	0	1
137	Uridine	138 Uridine	C9H12N2O6	[M-H]-	5.5	7.5	15	0.2	243.062	243.062	-1.9	S21001	6.67	6.59	6.79	0.2	39929036	38633720	29280460	34964468	34746340	25519622	25485736	30454376	14227	4031	12701	3219	8641	2787	6779	3565	0.0877347	11.398	35701921	2.90515e+07	0.297388	1.22892	30981.2	3.23767e+07	454	8
138	Uridine 5'-diphosphate	139 Uridine 5'-diphosphate	C9H14N2O12P2	[M+H]+	12.4	14.4	15	0.2	405.01	405.008	-3.2	S21006	13.51	13.49	13.75	0.26	963471	873604	519419	655522	1688482	1374689	1312165	1439584	23810	3946	112978	16917	79384	16962	137474	21225	0.0017155	582.92	753004	1453730	-0.94903	0.517981	164761	1103367	1242	8
139	Uridine 5'-monophosphate	140 Uridine 5'-monophosphate	C9H13N2O9P	[M-H]-	11.2	13.2	15	0.2	323.029	323.029	-0.3	S21001	12.21	12.19	12.29	0.11	32322396	29969974	31898226	31806634	14879332	11532959	14439823	13489560	210458	7052	186812	11871	244120	8337	415427	9418	1.10038e-06	908778	3.14993e+07	1.35854e+07	1.21326	2.31861	420061	22542363	47499065	8
140	Uridine diphosphate glucose	141 Uridine diphosphate glucose	C15H24N2O17P2	[M-H]-	12.4	14.4	15	0.2	565.048	565.048	-0.4	S21007	13.5	13.48	13.53	0.06	6847879	4943366	4498843	5236163	11496948	9139676	11089188	10721528	47846	0	60222	0	68526	0	197558	0	0.000363418	2751.65	5.38156e+06	10611835	-0.979577	0.507128	150307	7.9967e+06	43390	8
141	Uridine diphosphate-N-acetylglucosamine	142 Uridine diphosphate-N-acetylglucosamine	C17H27N3O17P2	[M+H]+	11.2	13.2	15	0.2	608.089	608.087	-2.7	S21014	12.27	12.17	12.31	0.14	942157	876146	677488	796083	1127242	789940	765406	875323	14381	0	10845	0	18510	0	27998	0	0.532282	1.8787	822968	889478	-0.112121	0.925227	36900.2	856223	2	8
142	Uridine triphosphate	143 Uridine triphosphate	C9H15N2O15P3	[M-H]-	15	18	15	0.2	482.961	482.959	-5.5	S21014	15.2	15.01	15.42	0.41	37798	53288	36216	29274.2	79474	77450	37404	97626	0	0	12642	0	9093	2361	23316	3986	0.0481005	20.7898	39144.1	72988.5	-0.898876	0.536305	29274.2	56066.3	2	7
143	Valerylcarnitine	144 Valerylcarnitine	C12H23NO4	[M+H]+	3.6	5.7	15	0.2	246.17	246.169	-2.8	S21007	4.93	4.7	5	0.3	264790	252653	194761	229701	127389	84866	83731	104948	13628	15857	11668	13643	12993	9388	14437	14272	0.0003358	2977.96	235476	100234	1.23222	2.34928	49707.2	167855	1174	8
144	Xanthine	145 Xanthine	C5H4N4O2	[M-H]-	7.5	9.4	15	0.2	151.026	151.025	-6.9	S21006	8.45	8.36	8.52	0.16	4638042	3904127	4285875	4666156	6157822	5807254	6626809	6383288	23770	17146	20267	15845	20889	16680	22823	15782	0.000292212	3422.17	4373550	6.24379e+06	-0.513618	0.700464	67450.8	5.30867e+06	25936	8
145	Xanthosine	146 Xanthosine	C10H12N4O6	[M-H]-	6.7	8.7	15	0.2	283.068	283.066	-8.5	S21009	7.44	7.44	7.47	0.03	10000	10000	10000	10000	13726	10000	10000	10000	0	0	0	0	0	0	0	0	0.355918	2.80964	10000	10931.5	-0.128491	0.914788	10000	10465.8	0	1
146	Xanthylic acid	147 Xanthylic acid	C10H13N4O9P	[M-H]-	11	13	15	0.2	363.035	363.036	4	S21015	11.75	11.75	11.75	0	10000	10000	10000	10000	10000	10000	10000	10000	0	0	0	0	0	0	0	0	NA	NA	10000	10000	0	1	10000	10000	0	0

## Sheet: WT vs. scd6edc3
	Skeleton_Metabolite	Metabolite	Formula	Ion Type	RT Start (min)	RT End (min)	m/z Tolerance (ppm)	RT Tolerance (min)	mz	obs_mz	ppm	winner	RT	RT_min	RT_max	RT_range	WT1	WT2	WT3	WT4	ES-1	ES-2	ES-3	ES-4	Blank_0	Blank_1	Blank_2	Blank_3	Blank_4	Blank_5	Blank_6	Blank_7	ttest_pval	1/pvalue	Control_Mean	Treatment_edc3_scd6_Mean	Log2FoldChange	LogFoldChange	blank_threshold	combined_mean	impact_score	Detection
0	1-Methylnicotinamide	1 1-Methylnicotinamide	C7H8N2O	[M+H]+	19	21	15	0.2	137.071	137.071	-1.7	S21002	19.25	19.09	19.42	0.33	151188	191775	133864	178797	99541	101577	114705	115271	38242	22880	34068	31086	40449	20984	30824	20243	0.00651355	153.526	163906	107774	0.604866	1.52084	99541	135840	32	7
1	2,3-Diphosphoglyceric acid	2 2,3-Diphosphoglyceric acid	C3H8O10P2	[M-H]-	12	15	15	0.2	264.952	264.95	-6.8	S21019	14.67	14.6	14.84	0.23	43950	47971	46823	67682	33688.4	53684	126214	50346	6112	2310	9552	3024	19347	1898	18392	2534	0.523937	1.90863	51606.5	65983.1	-0.354544	0.782117	33688.4	58794.8	0	7
2	3-Hydroxybutyric acid	3 3-Hydroxybutyric acid	C4H8O3	[M-H]-	5.7	7.7	15	0.2	103.04	103.038	-15.2	S21008	5.81	5.71	5.9	0.18	37738	37738	37738	37738	37738	37738	37738	37738	10687	9027	7931	7947	9384	8121	10526	10345	NA	NA	37738	37738	0	1	37738	37738	0	0
3	3-Phosphoglyceric acid	4 3-Phosphoglyceric acid	C3H7O7P	[M-H]-	13	15	15	0.2	184.986	184.985	-4.7	S21019	14.12	13.88	14.18	0.3	22833332	24572438	23690548	24806950	1.2471e+07	22221800	39512396	22349400	4370613	13132	6107761	1272479	10522380	1515760	8095642	1331696	0.977905	1.02259	23975817	2.41387e+07	-0.00976568	0.993254	1.2471e+07	2.40572e+07	25	7
4	4,5-Dihydroorotic acid	5 4,5-Dihydroorotic acid	C5H6N2O4	[M-H]-	7.5	9.5	15	0.2	157.025	157.025	-3.1	S21014	8.44	8.29	8.54	0.24	28792	20004	16371.6	18620	16371.6	16371.6	16371.6	16371.6	0	0	2752	2651	2638	3024	3294	2632	0.143547	6.96636	20946.9	16371.6	0.35554	1.27946	16371.6	18659.3	0	3
5	4-Hydroxyproline	6 4-Hydroxyproline	C5H9NO3	[M+H]+	10.2	11.2	15	0.2	132.065	132.065	-0.2	S21016	10.37	10.26	10.44	0.19	12487164	14396793	10581293	12953763	5866198	4794172	6656954	4311936	61939	37911	77597	48904	93056	48456	92924	57444	0.000272024	3676.15	1.26048e+07	5407315	1.22098	2.33106	204337	9.00603e+06	77176	8
6	5'-Methylthioadenosine	7 5'-Methylthioadenosine	C11H15N5O3S	[M+H]+	3	5	15	0.2	298.097	298.096	-3.1	S21007	4.14	3.97	4.17	0.2	6749668	7157858	5728988	5560512	5254022	3123170	4497274	4410822	101997	9037	144074	20142	183857	19521	268685	28152	0.0152074	65.7574	6.29926e+06	4321322	0.543709	1.45772	300799	5.31029e+06	509	8
7	5-Phosphoribosylamine	8 5-Phosphoribosylamine	C5H12NO7P	[M-H]-	11.5	13.5	15	0.2	228.028	228.026	-7.7	S21002	12.83	12.59	13.03	0.44	39793	43645	35558	33183	19280.1	19280.1	28777	22496	0	0	3778	0	12334	1941	5013	1681	0.00287633	347.665	38044.8	22458.3	0.760448	1.69402	19280.1	30251.5	18	6
8	6-Phosphogluconic acid	9 6-Phosphogluconic acid	C6H13O10P	[M-H]-	14	17	15	0.2	275.017	275.017	-2	S21019	14.91	14.7	15.09	0.39	782661	96953	250696	348617	51792.6	59491	957534	119653	11016	0	17674	0	41093	2105	35161	4398	0.793396	1.2604	369732	297118	0.315445	1.2444	51792.6	333425	1	7
9	Acetoacetic acid	10 Acetoacetic acid	C4H6O3	[M-H]-	8.3	10.3	15	0.2	101.024	101.023	-14	S21019	9.71	9.5	9.87	0.37	145063	162008	84760	174956	157889	155768	277910	135969	7593	4985	9572	9208	14674	8325	13632	8721	0.33136	3.01786	141697	181884	-0.360212	0.77905	38766.2	161790	1	8
10	Acetyl-CoA	11 Acetyl-CoA	C23H38N7O17P3S	[M+H]+	8	11	15	0.2	810.133	810.129	-4.9	S21009	9.55	9.51	9.66	0.14	76919	134984	10000	10000	69534	10000	10000	10000	0	0	0	0	0	0	0	0	0.362765	2.75661	57975.8	24883.5	1.22026	2.32989	10000	41429.6	0	3
11	Acetylcysteine	12 Acetylcysteine	C5H9NO3S	[M+H]+	6	8	15	0.2	164.038	164.038	0	S21016	7	6.88	7.16	0.28	47343	27339	30189	19684	24913	33404	23260	12247	0	0	5992	0	0	0	0	0	0.331877	3.01317	31138.8	23456	0.408754	1.32754	12247	27297.4	0	7
12	Adenine	13 Adenine	C5H5N5	[M+H]+	5	7	15	0.2	136.062	136.061	-2	S21019	5.81	5.77	6.05	0.29	5879732	8001253	3422715	4258571	12322655	28584520	63694412	20661322	653497	138789	560304	185950	422910	169490	369642	228547	0.0622168	16.0728	5.39057e+06	3.13157e+07	-2.53838	0.172136	1.03342e+06	1.83531e+07	1714	8
13	Adenosine	14 Adenosine	C10H13N5O4	[M+H]+	4.5	7	15	0.2	268.104	268.103	-2.4	S21019	5.78	5.76	5.88	0.12	8947122	3.43465e+06	20284444	25848942	39560124	178543344	400152096	130275712	3451116	367305	2443088	234860	1638992	185502	639540	171985	0.0657859	15.2008	1.46288e+07	187132819	-3.67718	0.0781733	3.43465e+06	1.00881e+08	19616	7
14	Adenosine diphosphate ribose	15 Adenosine diphosphate ribose	C15H23N5O14P2	[M-H]-	10.9	12.9	15	0.2	558.064	558.061	-6.5	S21009	12.02	11.94	12.14	0.2	11359.4	18623	11359.4	11359.4	15213	11359.4	11359.4	11359.4	0	0	0	0	0	0	3625	0	0.692772	1.44348	13175.3	12322.8	0.0965059	1.06918	11359.4	12749	0	2
15	Adenosine monophosphate	16 Adenosine monophosphate	C10H14N5O7P	[M+H]+	9.8	11.8	15	0.2	348.07	348.069	-2.8	S21004	10.84	10.77	10.87	0.1	65328544	57386284	70810928	81144192	24653150	27312902	45654156	38826724	3175328	82898	3420386	124618	2990514	91197	4257656	99859	0.00263313	379.776	68667487	34111733	1.00936	2.01302	5350921	51389610	39287	8
16	Adenosine triphosphate	17 Adenosine triphosphate	C10H16N5O13P3	[M-H]-	12.5	14.5	15	0.2	505.988	505.986	-4.9	S21014	13.74	13.67	13.97	0.3	36256	68187	36256	36256	36256	36256	36256	36256	0	0	17271	3242	14201	0	30696	4606	0.355918	2.80964	44238.8	36256	0.287091	1.22018	36256	40247.4	0	1
17	Adenylsuccinic acid	18 Adenylsuccinic acid	C14H18N5O11P	[M-H]-	14.5	16.5	15	0.2	462.067	462.064	-5.3	S21006	15.68	15.55	15.75	0.2	126986	139031	101416	124706	33820.8	36943	75078	37175	3895	0	15345	2709	16534	0	22525	2514	0.000847409	1180.07	123035	45754.2	1.42709	2.68904	33820.8	84394.5	268	7
18	ADP	19 ADP	C10H15N5O10P2	[M-H]-	11.1	13.1	15	0.2	426.022	426.022	-0.3	S21014	12.24	12.18	12.46	0.28	1001135	1574640	646743	449488	288340	542950	759022	535354	27124	6385	182645	35285	126591	22203	307944	34062	0.194786	5.13383	918002	531416	0.788654	1.72746	288340	724709	6	7
19	Allantoin	20 Allantoin	C4H6N4O3	[M-H]-	9.3	11.3	15	0.2	157.037	157.036	-7.7	S21006	10.3	10.19	10.39	0.21	12665	12073	12073	12073	12073	12073	12829	12073	0	2961	0	0	0	2567	0	0	0.869998	1.14943	12221	12262	-0.00483197	0.996656	12073	12241.5	0	2
20	Aminoadipic acid	21 Aminoadipic acid	C6H11NO4	[M-H]-	5.9	7.9	15	0.2	160.061	160.06	-7.1	S21007	7.42	7.29	7.53	0.24	5444028	5806707	4568336	3921158	7659252	1103356	2524980	2449282	3884	5963	4253	5572	6878	7448	3555	6049	0.357822	2.79468	4.93506e+06	3.43422e+06	0.523085	1.43703	26350.8	4.18464e+06	17	8
21	Argininosuccinic acid	22 Argininosuccinic acid	C10H18N4O6	[M-H]-	12.5	14.5	15	0.2	289.115	289.115	-0.6	S21006	13.67	13.62	13.76	0.14	429530	693211	401477	755652	2593996	1554435	2477774	1442360	54259	1762	25697	0	64113	0	86065	3550	0.00368822	271.134	569968	2.01714e+06	-1.82336	0.282562	98292.2	1.29355e+06	1241	8
22	Beta-Alanine	23 Beta-Alanine	C3H7NO2	[M+H]+	9.8	10.5	15	0.2	90.055	90.0554	4.9	S21008	10.05	9.93	10.3	0.37	1282898	1003352	993650	1109550	917198	653400	1022026	999486	45282	40567	55615	41227	59960	39751	60544	44760	0.114553	8.72962	1.09736e+06	898028	0.289209	1.22197	155390	997695	11	8
23	Betaine	24 Betaine	C5H11NO2	[M+H]+	7	8.2	15	0.2	118.086	118.086	0.4	S21008	7.87	7.8	7.87	0.07	531556096	307210912	407607744	412264640	253956800	156447408	311265088	296783744	946404	956435	1042694	929935	999649	977086	1163093	979891	0.0321707	31.0842	414659848	254613260	0.703621	1.62859	3.0082e+06	334636554	16940	8
24	Butyrylcarnitine	25 Butyrylcarnitine	C11H21NO4	[M+H]+	4.2	6.2	15	0.2	232.154	232.154	-2.3	S21006	5.62	5.45	5.79	0.34	661058	670327	502734	641074	660656	421545	786026	453058	11304	8741	10512	10198	8837	9698	7868	9525	0.699874	1.42883	618798	580321	0.0926174	1.0663	38756.1	599560	1	8
25	Carbamoyl phosphate	26 Carbamoyl phosphate	CH4NO5P	[M-H]-	27	30	15	0.2	139.975	139.975	-6	S21001	27.01	27	27.13	0.13	188475	68768	43846	33288	187740	25639.4	30472	58211	4132	1765	10814	3728	10339	1902	7167	1858	0.882159	1.13358	83594.2	75515.6	0.146629	1.10698	25639.4	79554.9	0	7
26	Carnosine	27 Carnosine	C9H14N4O3	[M+H]+	10.6	12.6	15	0.2	227.114	227.113	-2.9	S21006	11.93	11.86	12.08	0.21	351680	378755	258268	297524	372722	223680	373994	325754	20066	5998	15289	0	27889	0	25061	8647	0.957299	1.04461	321557	324038	-0.0110874	0.992344	48606.2	322797	0	8
27	CDP	28 CDP	C9H15N3O11P2	[M+H]+	13	15	15	0.2	404.026	404.024	-3.6	S21008	14.16	14.15	14.34	0.19	162031	188370	107440	119017	80272.4	80272.4	115084	110512	9838	0	53384	10508	28414	6588	67135	11526	0.064206	15.5749	144214	96535.2	0.579089	1.49391	80272.4	120375	3	6
28	Choline	29 Choline	C5H14NO	[Cat]+	11	15	15	0.2	104.107	104.107	2	S21008	14.99	14.98	15	0.02	88324544	127334872	115434224	154748624	51122260	48316760	120462168	61517256	864319	185605	463481	104110	869305	159474	803991	181097	0.0578023	17.3004	121460566	70354611	0.787771	1.72641	1.37177e+06	9.59076e+07	2865	8
29	cis-Aconitic acid	30 cis-Aconitic acid	C6H6O6	[M-H]-	14.1	16.1	15	0.2	173.009	173.008	-5.6	S21006	15.16	15.12	15.22	0.11	14539459	11723328	11588687	11503999	23115880	17086984	23533724	17848250	3099624	58699	2432993	42860	2335246	41749	2003900	41924	0.00482104	207.424	1.23389e+07	2.03962e+07	-0.725091	0.604959	3.78137e+06	1.63675e+07	5612	8
30	Citric acid	31 Citric acid	C6H8O7	[M-H]-	14.2	16.2	15	0.2	191.02	191.019	-3.8	S21008	15.34	15.22	15.58	0.36	135032592	125427984	134264256	111514384	126253896	133741304	221479712	143519936	3288378	230298	41312368	1120421	48277864	1181936	61168332	1906587	0.238742	4.18863	126559804	156248712	-0.304025	0.809989	59442319	141404258	731	8
31	Citrulline	32 Citrulline	C6H13N3O3	[M+H]+	10.9	12.9	15	0.2	176.103	176.103	-1.5	S21001	12.2	12.17	12.23	0.06	123621472	115319920	112174616	112477840	68040640	50661388	78205384	60656756	2461791	1123530	2640908	1159458	3978051	1391586	3582516	1425102	0.000197517	5062.87	115898462	64391042	0.84793	1.79992	6.6711e+06	90144752	821465	8
32	Creatine	33 Creatine	C4H9N3O2	[M+H]+	10	11.5	15	0.2	132.077	132.077	-1.2	S21008	10.95	10.91	10.99	0.08	2658000	1535524	2195480	2038054	1239884	1.17788e+06	1596550	1627042	394898	376050	410814	400252	393449	367920	401631	369323	0.0363081	27.542	2.10676e+06	1.41034e+06	0.578988	1.4938	1.17788e+06	1.75855e+06	72	7
33	Creatinine	34 Creatinine	C4H7N3O	[M+H]+	5.2	7.2	15	0.2	114.066	114.066	0.1	S21006	6.46	6.42	6.48	0.07	75228848	76039928	61681652	68857920	56312760	37186680	62411272	46143216	441152	358969	349774	373880	380130	371483	362266	366083	0.0218763	45.7116	70452087	50513482	0.479974	1.39472	1.1364e+06	6.04828e+07	3856	8
34	Cyclic AMP	35 Cyclic AMP	C10H12N5O6P	[M-H]-	5.8	7.8	15	0.2	328.045	328.044	-2.9	S21019	6.06	5.84	6.16	0.32	157409	53796	243881	200165	58843	40921	366605	134155	2271	2139	0	0	2084	0	2269	0	0.877792	1.13922	163813	150131	0.125826	1.09113	13286.1	156972	0	8
35	Cytidine	36 Cytidine	C9H13N3O5	[M+H]+	7.1	9.1	15	0.2	244.093	244.092	-1.6	S21009	8.35	8.32	8.42	0.1	5572136	5721322	4494207	4768076	3897830	3793362	6973551	4398137	92998	24123	63794	18793	49498	14446	25509	19837	0.659505	1.51629	5.13894e+06	4765720	0.108775	1.07831	125874	4.95233e+06	8	8
36	Cytidine monophosphate	37 Cytidine monophosphate	C9H14N3O8P	[M+H]+	11.8	13.8	15	0.2	324.059	324.058	-3.2	S21006	12.9	12.83	13	0.17	3181286	2629604	2694252	2959538	1374089	1147670	2136147	1792213	109271	3811	99234	11496	120505	6214	161247	11668	0.00260505	383.87	2866170	1.61253e+06	0.829798	1.77744	206292	2.23935e+06	1528	8
37	Cytidine triphosphate	38 Cytidine triphosphate	C9H16N3O14P3	[M-H]-	15	20	15	0.2	481.977	481.976	-3	S21014	15.56	15.37	15.79	0.42	12384.6	12384.6	12384.6	12384.6	12384.6	12384.6	12384.6	12384.6	0	0	0	0	0	0	6359	0	NA	NA	12384.6	12384.6	0	1	12384.6	12384.6	0	0
38	Cytosine	39 Cytosine	C4H5N3O	[M+H]+	9	11	15	0.2	112.05	112.051	0.5	S21008	9.52	9.28	9.75	0.47	256205	256205	256205	256205	256205	256205	256205	256205	86105	86397	82881	79058	80082	73147	78192	90684	NA	NA	256205	256205	0	1	256205	256205	0	0
39	D-2-Hydroxyglutaric acid	40 D-2-Hydroxyglutaric acid	C5H8O5	[M-H]-	11.6	13.6	15	0.2	147.03	147.029	-6.8	S21007	12.43	12.35	12.44	0.09	3096292	4602463	3927273	4671038	4669784	3673586	4022356	4337402	125172	50664	81566	44673	82040	61818	110623	59284	0.818819	1.22127	4.07427e+06	4175782	-0.035506	0.975689	240940	4.12502e+06	5	8
40	D-Glucose	41 D-Glucose	C6H12O6	[M-H]-	9	11	15	0.2	179.056	179.055	-4	S21008	10.21	9.99	10.22	0.23	16556572	10806419	14425153	13865060	3982444	2306462	7071912	6153656	22103	15606	19496	14432	21361	19981	20280	21273	0.00132736	753.377	13913301	4.87862e+06	1.51192	2.85189	67949.5	9.39596e+06	20188	8
41	D-Glyceraldehyde 3-phosphate	42 D-Glyceraldehyde 3-phosphate	C3H7O6P	[M-H]-	13	14	15	0.2	168.991	168.991	-0.3	S21014	13.15	13.03	13.32	0.3	40541	21301.8	22186	21301.8	33865	29728	67492	41025	6663	0	7332	0	7243	0	5314	3586	0.136581	7.32168	26332.6	43027.5	-0.708408	0.611995	21301.8	34680.1	0	6
42	Dihydrofolic acid	43 Dihydrofolic acid	C19H21N7O6	[M+H]+	13	16	15	0.2	444.163	444.161	-3.2	S21006	15.9	15.68	15.9	0.22	16054.8	16054.8	16054.8	16054.8	16054.8	16054.8	16054.8	16054.8	0	5131	0	3233	0	2977	4805	0	NA	NA	16054.8	16054.8	0	1	16054.8	16054.8	0	0
43	Dihydroxyacetone phosphate	44 Dihydroxyacetone phosphate	C3H7O6P	[M-H]-	12	13	15	0.2	168.991	168.99	-5	S21014	12.44	12.34	12.55	0.21	2442026	93983	419062	91182	2512904	1470993	4938144	1252746	9913	0	15275	2089	21946	0	17421	0	0.129968	7.69421	761563	2.5437e+06	-1.73989	0.299392	34991.5	1652630	42	8
44	D-Ribose 5-phosphate	45 D-Ribose 5-phosphate	C5H11O8P	[M-H]-	12.4	13.8	15	0.2	229.012	229.011	-2.1	S21006	12.74	12.69	12.98	0.28	6679558	6511872	6490988	7202386	3312607	3581832	6714900	4112989	112365	2790	159821	8509	337655	7293	300434	10312	0.0282545	35.3926	6721201	4430582	0.601223	1.517	362192	5.57589e+06	299	8
45	D-Sedoheptulose 7-phosphate	46 D-Sedoheptulose 7-phosphate	C7H15O10P	[M-H]-	12.2	14.2	15	0.2	289.033	289.033	-1.1	S21006	13.29	13.25	13.44	0.19	2136508	2340922	1480298	2895684	908230	833970	1291807	1498170	55239	2490	74746	8105	59994	8855	180934	8947	0.0174056	57.4529	2213353	1.13304e+06	0.966029	1.95346	159741	1.6732e+06	188	8
46	dTDP	47 dTDP	C10H16N2O11P2	[M-H]-	11	13	15	0.2	401.016	401.014	-5.1	S21004	11.74	11.59	11.85	0.26	72952	70677	81900	121097	25969	30166	46829	49811	5252	0	10544	0	10740	2590	10027	3431	0.0102679	97.3912	86656.5	38193.8	1.18197	2.26887	25969	62425.1	14	7
47	FAD	48 FAD	C27H33N9O15P2	[M+H]+	7.6	9.6	15	0.2	786.164	786.162	-3.3	S21006	8.77	8.58	8.82	0.23	112020	127227	89345	123130	86889	22024	58197	41223	0	0	0	0	0	0	0	0	0.009354	106.906	112930	52083.2	1.11654	2.16827	10000	82506.9	19	8
48	Folic acid	49 Folic acid	C19H19N7O6	[M+H]+	13	16	15	0.2	442.147	442.152	10.9	S21001	13.37	13.13	13.53	0.39	27887	10596	14350	10000	10352	10000	10000	10000	0	0	0	0	0	0	0	0	0.226694	4.41123	15708.2	10088	0.638882	1.55712	10000	12898.1	0	4
49	Fructose 1,6-bisphosphate	50 Fructose 1,6-bisphosphate	C6H14O12P2	[M-H]-	14.1	16.1	15	0.2	338.989	338.988	-3.5	S21008	15.34	15.19	15.58	0.39	116380	115704	420564	156003	115704	115704	133305	115704	4508	0	61567	6218	23950	2684	173764	9185	0.307171	3.25551	202163	120104	0.751234	1.68323	115704	161133	1	4
50	Fructose 6-phosphate	51 Fructose 6-phosphate	C6H13O9P	[M-H]-	12.6	13.5	15	0.2	259.022	259.022	-1.7	S21006	13.24	13.01	13.31	0.3	4494516	1833216	2807036	3921001	4454672	3891486	7976972	6780712	544371	19943	441880	20892	368272	17791	512615	24471	0.068118	14.6804	3.26394e+06	5.77596e+06	-0.823445	0.565091	741338	4.51995e+06	117	8
51	Fumaric acid	52 Fumaric acid	C4H4O4	[M-H]-	12.2	14.2	15	0.2	115.004	115.002	-11.2	S21006	13.17	13.17	13.31	0.14	8150326	7280081	6155558	7994624	14138291	10261589	15117802	10403581	499656	28718	127334	18410	73472	24826	55744	15976	0.00890377	112.312	7.39515e+06	1.24803e+07	-0.755004	0.592545	326551	9.93773e+06	1884	8
52	Glucose 6-phosphate	53 Glucose 6-phosphate	C6H13O9P	[M-H]-	13.6	14.4	15	0.2	259.022	259.022	-0.6	S21008	13.93	13.86	13.93	0.07	15511645	6999394	11052373	11419230	10745239	9795997	17727492	14667567	2419216	42456	2150449	75278	2063197	64791	3781504	118145	0.461101	2.16872	1.12457e+07	1.32341e+07	-0.234889	0.84975	4.02814e+06	1.22399e+07	31	8
53	Glutathione	54 Glutathione	C10H17N3O6S	[M+H]+	10	13	15	0.2	308.091	308.09	-3.2	S21001	11.41	11.35	11.45	0.09	61081116	53315432	49344552	52239172	18323184	18692946	46187528	20203686	156551	85576	440535	230308	600120	330924	959870	482096	0.00809568	123.523	53995068	25851836	1.06256	2.08864	1.24224e+06	39923452	10300	8
54	Glycerol 3-phosphate	55 Glycerol 3-phosphate	C3H9O6P	[M-H]-	11.5	13	15	0.2	171.006	171.006	-5.3	S21006	12.06	11.89	12.3	0.41	218922	268906	184114	188256	379638	264691	445043	343018	6834	2385	6586	0	8476	2092	14353	4037	0.0149623	66.8346	215050	358098	-0.735684	0.600533	26786.1	286574	32	8
55	Glycine	56 Glycine	C2H5NO2	[M+H]+	10.7	12.7	15	0.2	76.0393	76.0399	7.8	S21015	11.94	11.92	11.99	0.08	4454935	3835482	3919960	3984922	5198586	3951686	5525642	4910048	282418	142627	302614	161817	351987	145698	378217	148775	0.0599851	16.6708	4.04882e+06	4.89649e+06	-0.274245	0.826883	727807	4.47266e+06	90	8
56	Guanidoacetic acid	57 Guanidoacetic acid	C3H7N3O2	[M+H]+	10.7	12.7	15	0.2	118.061	118.061	0.8	S21008	12.01	11.95	12.04	0.09	2845724	1320204	2412496	2123670	1336381	781386	1746161	1890647	54245	17365	71111	22964	54439	22980	131280	27184	0.119667	8.35652	2.17552e+06	1.43864e+06	0.596653	1.5122	160588	1.80708e+06	23	8
57	Guanine	58 Guanine	C5H5N5O	[M+H]+	7.7	9.7	15	0.2	152.057	152.056	-1.2	S21016	8.67	8.6	8.9	0.3	34319652	29645062	36574040	41075204	36218452	32226566	57281896	40417240	164034	47535	209126	50056	272436	57326	158621	56603	0.346167	2.88878	3.54035e+07	4.1536e+07	-0.230472	0.852356	390901	38469764	130	8
58	Guanosine	59 Guanosine	C10H13N5O5	[M+H]+	7.7	9.7	15	0.2	284.099	284.098	-3	S21013	9.03	8.91	9.08	0.17	5713625	5201582	5187412	5606839	4867368	4006910	7094908	4304826	84190	16592	78493	12891	76329	11249	56370	7831	0.632116	1.58199	5.42736e+06	5068503	0.0986921	1.0708	138979	5.24793e+06	9	8
59	Guanosine diphosphate	60 Guanosine diphosphate	C10H15N5O11P2	[M-H]-	13.8	15.8	15	0.2	442.017	442.015	-5.6	S21015	15.1	14.99	15.33	0.34	82669	127845	75638	71503.4	71503.4	71503.4	71503.4	71503.4	3872	0	33266	14724	31493	6227	59662	14765	0.217965	4.5879	89413.8	71503.4	0.322487	1.25048	71503.4	80458.6	0	3
60	Guanosine monophosphate	61 Guanosine monophosphate	C10H14N5O8P	[M+H]+	12.6	14.6	15	0.2	364.065	364.064	-3	S21015	13.73	13.66	13.77	0.11	3696334	3449334	3166818	3653446	1111390	1021181	1586896	1582016	122541	8678	211819	17643	183518	12110	369146	20582	3.00748e-05	33250.4	3491483	1.32537e+06	1.39744	2.63434	364764	2.40843e+06	210961	8
61	Guanosine triphosphate	62 Guanosine triphosphate	C10H16N5O14P3	[M-H]-	15	17	15	0.2	521.983	521.979	-9.4	S21014	16.6	16.35	16.84	0.49	12914.5	12914.5	12914.5	12914.5	12914.5	12914.5	12914.5	12914.5	0	0	2431	2107	0	0	3234	0	NA	NA	12914.5	12914.5	0	1	12914.5	12914.5	0	0
62	Homocysteine	63 Homocysteine	C4H9NO2S	[M-H]-	7.3	9.3	15	0.2	134.028	134.027	-11.4	S21016	8.5	8.32	8.52	0.2	10000	10000	10000	10000	10000	10000	10000	10000	0	0	0	0	0	0	0	0	NA	NA	10000	10000	0	1	10000	10000	0	0
63	Hypotaurine	64 Hypotaurine	C2H7NO2S	[M+H]+	10	12	15	0.2	110.027	110.026	-5.7	S21012	11.02	10.85	11.25	0.4	40811	42278	54671	39722	47614	32757	55922	54020	0	0	0	0	0	0	4990	0	0.628553	1.59096	44370.5	47578.2	-0.100701	0.932579	11871.2	45974.4	0	8
64	Hypoxanthine	65 Hypoxanthine	C5H4N4O	[M+H]+	5.8	7.8	15	0.2	137.046	137.046	-2.1	S21019	6.92	6.86	7	0.14	216144288	227251536	209111792	248242736	335706336	290277664	398282464	313302816	561440	129832	470799	139704	725246	156424	577781	150168	0.00450783	221.836	225187588	334392320	-0.570414	0.673423	1.10177e+06	279789954	92167	8
65	Inosine	66 Inosine	C10H12N4O5	[M+H]+	6.4	8.4	15	0.2	269.088	269.087	-3.1	S21019	7.59	7.5	7.69	0.19	44378672	42725448	40152280	43631900	46315824	36812816	49435020	39342180	80159	0	61710	6939	93731	0	74556	8292	0.936973	1.06727	42722075	42976460	-0.00856493	0.994081	132020	4.28493e+07	46	8
66	Inosinic acid	67 Inosinic acid	C10H13N4O8P	[M+H]+	11.4	13.4	15	0.2	349.054	349.053	-3.1	S21002	12.56	12.51	12.77	0.25	784255	1226088	764353	811644	233038	119056	220731	196683	14359	4217	14756	5757	21775	0	28592	3803	0.000796796	1255.03	896585	192377	2.2205	4.66056	44972.1	544481	3185	8
67	L-Acetylcarnitine	68 L-Acetylcarnitine	C9H17NO4	[M+H]+	6.3	8.3	15	0.2	204.123	204.123	-2.1	S21006	7.57	7.47	7.6	0.12	1356361088	1381872640	1177530496	1313142784	970227840	696559808	1110198528	776612928	178312	25552	272093	54627	317282	52871	395040	52166	0.00693148	144.269	1307226752	888399776	0.557228	1.47144	515479	1097813264	233048	8
68	L-Alanine	69 L-Alanine	C3H7NO2	[M+H]+	10.6	11.2	15	0.2	90.055	90.0553	3.8	S21013	11.06	11.03	11.09	0.06	81039768	69166024	66069772	69489224	91695488	73424848	102596232	86868952	1947715	837478	2501886	843669	2410774	807253	2155295	920619	0.0465789	21.469	71441197	88646380	-0.311305	0.805912	4.66926e+06	8.00438e+07	2132	8
69	L-Arginine	70 L-Arginine	C6H14N4O2	[M+H]+	18.5	21	15	0.2	175.119	175.119	-1.4	S21009	20.17	20.17	20.4	0.23	984592960	979015296	888694912	943977024	806787220	806787220	1048238720	857351296	343338752	94952224	403437632	139260144	443666752	151799808	434235200	140715408	0.30289	3.30153	949070048	879791114	0.109354	1.07874	806787220	914430581	3257	6
70	L-Asparagine	71 L-Asparagine	C4H8N2O3	[M+H]+	10.3	12.3	15	0.2	133.061	133.06	-2	S21009	11.64	11.57	11.67	0.1	18034802	15964195	16659570	14967322	21521570	16224039	22703762	18738270	465822	79669	804152	91739	708635	90980	847160	112751	0.0767926	13.0221	1.64065e+07	1.97969e+07	-0.27101	0.828739	1.21034e+06	1.81017e+07	284	8
71	L-Aspartic acid	72 L-Aspartic acid	C4H7NO4	[M-H]-	10.8	12.8	15	0.2	132.03	132.029	-8.6	S21016	11.93	11.89	11.97	0.08	159893472	153973296	139081984	142682368	114954560	90965728	134312032	109201904	4493281	432247	4942630	531045	5041587	569639	6527054	580120	0.0113877	87.8144	148907780	112358556	0.406309	1.32529	8.6791e+06	130633168	15203	8
72	L-Carnitine	73 L-Carnitine	C7H16NO3	[Cat]+	8.3	10.3	15	0.2	162.113	162.112	-1.7	S21016	9.7	9.67	9.72	0.06	395927296	463056576	348904224	411155552	404476576	301024320	478329152	337318080	415471	89678	456456	109360	674818	93909	686349	105283	0.610855	1.63705	404760912	380287032	0.0899812	1.06436	996746	392523972	684	8
73	L-Cystathionine	74 L-Cystathionine	C7H14N2O4S	[M+H]+	12.2	14.2	15	0.2	223.075	223.074	-1.4	S21016	13.44	13.44	13.6	0.16	5747194	5536890	4986348	4516238	3376877	2437484	4049402	3479438	230414	10602	407845	40081	346000	30614	405386	34863	0.00518485	192.87	5.19667e+06	3.3358e+06	0.639554	1.55785	574677	4.26623e+06	1282	8
74	L-Cysteine	75 L-Cysteine	C3H7NO2S	[M+H]+	13	17	15	0.2	122.027	122.027	-1.9	S21002	16.9	16.76	16.99	0.23	27852	39674	32067	29458	32507	39506	30851	30376	5856	4652	7184	3840	6503	4260	5320	4895	0.766245	1.30507	32262.8	33310	-0.0460859	0.96856	25941.2	32786.4	0	8
75	L-Cystine	76 L-Cystine	C6H12N2O4S2	[M-H]-	11.7	13.7	15	0.2	239.017	239.015	-4.9	SQ989_Blank_5	12.94	12.69	13	0.31	20905	20905	20905	20905	20905	20905	20905	20905	5037	0	5212	4215	0	6719	3348	4549	NA	NA	20905	20905	0	1	20905	20905	0	0
76	L-Glutamic acid	77 L-Glutamic acid	C5H9NO4	[M+H]+	10	13	15	0.2	148.06	148.06	-2.3	S21007	11.68	11.59	11.7	0.11	654928256	638335168	593272768	626465536	513510976	383005920	533885984	440317376	17245526	821533	18847084	1184088	19974700	1164571	27229938	1723148	0.00488661	204.641	628250432	467680064	0.425818	1.34333	3.30815e+07	547965248	150636	8
77	L-Glutamine	78 L-Glutamine	C5H10N2O3	[M+H]+	10.1	12.1	15	0.2	147.076	147.076	-2.2	S21013	11.4	11.35	11.47	0.12	559668864	504041248	500403552	506203264	712668672	626906496	760636352	685099200	30092348	683117	44805924	1354054	38158496	1259683	30336682	1421964	0.00123994	806.494	517579232	696327680	-0.427987	0.743298	5.55521e+07	606953456	658557	8
78	L-Histidine	79 L-Histidine	C6H9N3O2	[M+H]+	9.9	11.9	15	0.2	156.077	156.077	-1.6	S21015	10.94	10.92	11.18	0.25	469274720	499700864	454575552	392796160	394296288	329516480	505299104	406280384	6630341	661024	20692758	2072504	31607652	2755984	26378404	2948461	0.330201	3.02846	454086824	408848064	0.151403	1.11065	35165173	431467444	1451	8
79	L-Isoleucine	80 L-Isoleucine	C6H13NO2	[M+H]+	6	7.5	15	0.2	132.102	132.102	-1.6	S21014	7.38	7.33	7.41	0.08	218774416	182620304	178196272	189743792	241122416	177400272	284096832	219276016	1178276	916923	1277192	870757	1309576	946878	1410010	986914	0.163612	6.11202	192333696	230473884	-0.260992	0.834514	3.3462e+06	211403790	1548	8
80	L-Kynurenine	81 L-Kynurenine	C10H12N2O3	[M+H]+	6	8	15	0.2	209.092	209.091	-2.7	S21002	7.37	7.27	7.4	0.13	16761823	17676076	14708108	16886976	13571068	10820480	17137036	11783711	52930	30473	50235	29810	57993	38494	49057	37074	0.0827386	12.0863	1.65082e+07	1.33281e+07	0.308719	1.23861	139775	1.49182e+07	223	8
81	L-Lactic acid	82 L-Lactic acid	C3H6O3	[M-H]-	6.2	8.2	15	0.2	89.0244	89.0233	-12.6	S21014	7.04	7	7.08	0.08	4.70597e+06	4.70597e+06	4.70597e+06	4.70597e+06	4.70597e+06	4.70597e+06	4.70597e+06	4.70597e+06	1602657	1562534	1573654	1573948	1541684	1524426	1501105	1642578	NA	NA	4.70597e+06	4.70597e+06	0	1	4.70597e+06	4.70597e+06	0	0
82	L-Leucine	83 L-Leucine	C6H13NO2	[M+H]+	7.5	9	15	0.2	132.102	132.102	-1.6	S21013	7.45	7.45	7.7	0.25	151413088	106935592	134880608	136370080	168907408	124168152	215395424	167791504	742976	605004	919731	579753	1040047	654485	957289	665967	0.128523	7.78071	132399842	169065622	-0.352682	0.783127	2.32197e+06	150732732	1498	8
83	L-Lysine	84 L-Lysine	C6H14N2O2	[M+H]+	18	20	15	0.2	147.113	147.113	-2.1	S21009	19.21	19.17	19.34	0.17	466568256	468098272	443011488	429620128	342495840	358639904	506123264	405977216	124107856	14626129	159557648	24295790	190818784	30850518	148514592	23676322	0.24884	4.01864	451824536	403309056	0.163877	1.12029	2.68678e+08	427566796	1925	8
84	L-Malic acid	85 L-Malic acid	C4H6O5	[M-H]-	12.2	14.2	15	0.2	133.014	133.013	-9.4	S21006	13.17	13.16	13.25	0.09	89831560	82190320	66374648	89165104	147319328	110028016	160618848	108408960	7883238	1124152	3543334	718963	4242227	836038	2467080	497144	0.013157	76.0052	81890408	131593788	-0.684325	0.622297	8002066	106742098	13037	8
85	L-Methionine	86 L-Methionine	C5H11NO2S	[M+H]+	6.8	8.8	15	0.2	150.058	150.058	-1.5	S21009	8.06	7.97	8.11	0.14	170829680	167599152	146296240	157925936	227466352	172153184	252016288	191384592	266568	64675	279574	82240	381054	83512	262339	99568	0.0368496	27.1373	160662752	210755104	-0.391532	0.76232	579824	185708928	6611	8
86	L-Phenylalanine	87 L-Phenylalanine	C9H11NO2	[M+H]+	5.6	7.6	15	0.2	166.086	166.086	-1.5	S21015	6.81	6.76	6.86	0.1	299060416	254319392	242790944	272902592	332664544	231601200	410264256	294640000	1109886	836541	1188137	878140	1230040	943485	1301431	981271	0.250288	3.9954	267268336	317292500	-0.247524	0.842341	3.18585e+06	292280418	1386	8
87	L-Proline	88 L-Proline	C5H9NO2	[M+H]+	7.9	9.9	15	0.2	116.071	116.071	0.8	S21009	9.22	9.18	9.24	0.07	486158720	504388448	466314528	507188672	567472512	460159840	642225344	546119360	7075474	5678172	7338664	5607189	8124797	5706298	7899396	6109093	0.154144	6.48746	491012592	553994264	-0.174111	0.886313	2.00872e+07	522503428	3825	8
88	L-Serine	89 L-Serine	C3H7NO3	[M+H]+	10.8	12.8	15	0.2	106.05	106.05	2.2	S21015	12.07	12.04	12.09	0.05	26455344	24079814	21725256	22584784	27885484	21213718	30668236	25422756	1532604	974497	1969294	899836	2014806	956194	1906231	1042765	0.29543	3.38489	2.37113e+07	2.62975e+07	-0.149354	0.901654	4.24609e+06	25004424	94	8
89	L-Threonine	90 L-Threonine	C4H9NO3	[M-H]-	9.5	11.5	15	0.2	118.051	118.05	-10.7	S21014	10.84	10.77	10.88	0.12	15979350	14401182	12157439	13880629	31310692	22460394	30950324	21955030	874314	198477	915581	232416	1038527	251586	998930	283930	0.00346899	288.269	14104650	26669110	-0.918999	0.528876	1.80766e+06	20386880	11112	8
90	L-Tryptophan	91 L-Tryptophan	C11H12N2O2	[M+H]+	6.8	8.8	15	0.2	205.097	205.097	-1.7	S21013	8.13	8.08	8.19	0.11	19016468	14570385	15284980	16807384	21286376	15334168	26940538	19999040	122046	97306	141409	117412	158508	104472	149194	99368	0.134168	7.45332	1.64198e+07	2.089e+07	-0.347378	0.786012	381143	1.86549e+07	177	8
91	L-Tyrosine	92 L-Tyrosine	C9H11NO3	[M+H]+	8.2	10.2	15	0.2	182.081	182.081	-1.5	S21013	9.47	9.4	9.52	0.12	77650496	71396976	65917808	71663760	113240968	90370112	131199608	101958680	1200096	593354	1266230	660915	1540388	675272	1556278	741804	0.0059345	168.506	71657260	109192342	-0.607687	0.656248	3.09788e+06	90424801	23219	8
92	L-Valine	93 L-Valine	C5H11NO2	[M+H]+	8.3	9.2	15	0.2	118.086	118.086	0.4	S21013	8.96	8.89	8.97	0.07	187044240	174902496	156845088	175814688	240709824	188326896	268962240	214144080	1725438	1004749	1839931	1019150	1868688	1089140	1849842	1031537	0.0255544	39.1323	173651628	228035760	-0.393064	0.761511	4.29568e+06	200843694	10321	8
93	N6-Acetyl-L-lysine	94 N6-Acetyl-L-lysine	C8H16N2O3	[M+H]+	1.9	3.9	15	0.2	189.123	189.122	-8.8	S21016	2.92	2.86	2.96	0.1	2117628	1.56149e+06	1.56149e+06	1.56149e+06	1.56149e+06	1.56149e+06	1.56149e+06	1.56149e+06	519447	546931	454369	476753	532686	465946	539709	601453	0.355918	2.80964	1.70052e+06	1.56149e+06	0.123058	1.08904	1.56149e+06	1.631e+06	5	1
94	N-Acetylglutamic acid	95 N-Acetylglutamic acid	C7H11NO5	[M+H]+	10.3	12.3	15	0.2	190.071	190.071	-2.1	S21014	11.32	11.1	11.4	0.3	3720366	3129967	2994724	3022174	1848461	1251168	2211600	1598105	19201	10008	15241	14388	19696	10615	20486	14596	0.00134759	742.064	3.21681e+06	1.72733e+06	0.897083	1.8623	56586.6	2.47207e+06	3416	8
95	N-Acetylglutamine	96 N-Acetylglutamine	C7H12N2O4	[M-H]-	6.8	8.8	15	0.2	187.072	187.072	-4.4	S21014	7.9	7.73	8.08	0.34	3987010	3628364	2672238	3153185	7272341	5160054	8227990	5455801	4318	2676	4428	4706	2986	2742	3508	4128	0.00693626	144.17	3.3602e+06	6.52905e+06	-0.958326	0.514654	21059.5	4.94462e+06	1385	8
96	N-Acetyl-L-alanine	97 N-Acetyl-L-alanine	C5H9NO3	[M+H]+	6	7	15	0.2	132.065	132.065	-1.7	S21002	6.47	6.39	6.71	0.32	1073726	1153480	939896	1132374	400737	263574	532198	354081	34542	29647	51234	33858	54394	44618	51017	37509	8.6598e-05	11547.6	1074869	387648	1.47134	2.7728	136307	731258	23414	8
97	N-Acetyl-L-methionine	98 N-Acetyl-L-methionine	C7H13NO3S	[M+H]+	3	5	15	0.2	192.069	192.069	-1.5	S21014	4.27	4.02	4.49	0.47	340883	332024	223129	272602	391265	197675	305308	214256	11817	0	10147	12177	9571	7648	10866	10880	0.784626	1.27449	292160	277126	0.0762141	1.05425	37414.8	284643	0	8
98	N-Acetyl-L-phenylalanine	99 N-Acetyl-L-phenylalanine	C11H13NO3	[M+H]+	2.8	4	15	0.2	208.097	208.096	-1.5	S21015	3.28	3.21	3.3	0.08	1022736	1026952	968940	968940	968940	968940	968940	968940	332418	292556	305775	358326	302228	357741	297255	310874	0.13443	7.43879	996892	968940	0.04103	1.02885	968940	982916	8	2
99	N-Acetylornithine	100 N-Acetylornithine	C7H14N2O3	[M+H]+	8.6	10.6	15	0.2	175.108	175.107	-1.3	S21009	10.03	9.87	10.05	0.18	6625530	7334833	5930022	7305522	8628761	5824982	10004112	6963714	79802	62809	89659	54429	116244	61671	107254	55244	0.321244	3.1129	6.79898e+06	7.85539e+06	-0.208366	0.865517	245167	7.32718e+06	26	8
100	N-Acetylserine	101 N-Acetylserine	C5H9NO4	[M-H]-	7.5	8.5	15	0.2	146.046	146.045	-7.4	S21013	8.02	7.92	8.06	0.14	1620954	1288334	1213562	1269152	1929181	1152918	2178222	1554789	41696	42090	43900	39717	55249	37327	47637	38323	0.192229	5.20214	1.348e+06	1.70378e+06	-0.337916	0.791183	139727	1525889	10	8
101	NAD	102 NAD	C21H28N7O14P2	[Cat]+	9.9	11.9	15	0.2	664.116	664.114	-3	S21002	10.98	10.86	11.03	0.16	5641429	8322845	3725593	5396338	4705710	555218	878275	1589271	65922	0	68183	0	38649	0	222099	0	0.0289095	34.5907	5.77155e+06	1.93212e+06	1.57878	2.98716	158070	3.85183e+06	398	8
102	NADH	103 NADH	C21H29N7O14P2	[M-H]-	9.5	11.5	15	0.2	664.117	664.114	-5.3	S21015	10.55	10.53	10.75	0.23	180145	19355	10000	27291	10000	10000	18743	10000	0	0	0	0	0	0	0	0	0.290135	3.44667	59197.8	12185.8	2.28035	4.85795	10000	35691.8	1	4
103	NADP	104 NADP	C21H29N7O17P3	[Cat]+	12.7	14.7	15	0.2	744.083	744.08	-3.4	S21008	13.92	13.89	14.13	0.25	382590	420304	298619	345417	56522.1	90879	225987	115321	7464	4541	28007	5062	22734	4122	47833	4296	0.001776	563.063	361732	122177	1.56595	2.96072	56522.1	241955	403	7
104	NADPH	105 NADPH	C21H30N7O17P3	[M-H]-	13	15	15	0.2	744.084	744.085	2	S21011	14.46	14.3	14.6	0.3	10000	10000	10000	10000	10000	10000	10000	10000	0	0	0	0	0	0	0	0	NA	NA	10000	10000	0	1	10000	10000	0	0
105	Niacinamide	106 Niacinamide	C6H6N2O	[M+H]+	3.3	5.3	15	0.2	123.055	123.055	0.1	SQ989_Blank_4	4.42	4.36	4.45	0.08	1.07034e+07	1.07034e+07	1.07034e+07	1.07034e+07	1.07034e+07	1.07034e+07	1.07034e+07	1.07034e+07	3671734	2947974	3893300	3335005	4257630	3291484	3803460	3315160	NA	NA	1.07034e+07	1.07034e+07	0	1	1.07034e+07	1.07034e+07	0	0
106	Nicotinic acid	107 Nicotinic acid	C6H5NO2	[M-H]-	5.5	7.5	15	0.2	122.025	122.023	-11.9	S21008	5.47	5.47	5.71	0.24	68305	35428	84155	86226	35428	35428	49639	35428	7991	4211	12122	9266	12430	6896	7097	7795	0.0526081	19.0085	68528.5	38980.8	0.813942	1.75801	35428	53754.6	2	4
107	O-Phosphoethanolamine	108 O-Phosphoethanolamine	C2H8NO4P	[M+H]+	11.4	13.4	15	0.2	142.026	142.026	-0.5	S21002	12.74	12.62	12.9	0.28	58323	59421	53426	45292	17910.6	21170	42385	24057	3982	0	4341	0	4371	0	8401	0	0.00474804	210.613	54115.5	26380.7	1.03656	2.05133	17910.6	40248.1	17	7
108	Ornithine	109 Ornithine	C5H12N2O2	[M+H]+	17	19	15	0.2	133.097	133.097	-1.2	S21006	17.59	17.54	17.78	0.24	42865640	44555364	40115024	47977420	2.63628e+07	28163658	41035940	34462468	9525285	1227486	13375504	2601702	15679397	2744050	21367018	3753625	0.0221969	45.0513	43878362	3.25062e+07	0.432794	1.34985	2.63628e+07	3.81923e+07	2323	7
109	Orotic acid	110 Orotic acid	C5H4N2O4	[M-H]-	6.7	8.7	15	0.2	155.01	155.009	-7.3	S21013	7.57	7.47	7.68	0.22	4785078	4425946	3894072	4789272	1536590	1180198	1301930	825518	0	2821	0	0	2514	0	3588	1994	1.49774e-05	66767.3	4473592	1211059	1.88516	3.69395	14093.9	2.84233e+06	701017	8
110	Orotidylic acid	111 Orotidylic acid	C10H13N2O11P	[M+H]+	0	30	15	0.2	369.033	369.036	7.1	S21008	11.11	11.11	11.11	0	10000	10000	10000	10000	10000	10000	10000	10000	0	0	0	0	0	0	0	0	NA	NA	10000	10000	0	1	10000	10000	0	0
111	Oxidized glutathione	112 Oxidized glutathione	C20H32N6O12S2	[M+H]+	13.5	15.5	15	0.2	613.159	613.158	-2.4	S21014	14.63	14.63	14.73	0.1	7982562	8208834	8312048	8200242	7011388	4543403	2999476	5892008	250303	35124	532200	122175	486176	162684	716315	228545	0.0124169	80.5354	8.17592e+06	5.11157e+06	0.677615	1.59949	960071	6.64375e+06	856	8
112	Oxoadipic acid	113 Oxoadipic acid	C6H8O5	[M-H]-	7.5	9.5	15	0.2	159.03	159.029	-5	S21015	7.7	7.58	7.94	0.37	22166.9	22166.9	22166.9	22166.9	22166.9	22166.9	22166.9	22166.9	5565	4482	3404	4246	3046	2587	3224	5891	NA	NA	22166.9	22166.9	0	1	22166.9	22166.9	0	0
113	Oxoglutaric acid	114 Oxoglutaric acid	C5H6O5	[M-H]-	10.8	14.8	15	0.2	145.014	145.013	-7.2	S21007	12.74	12.5	12.78	0.27	5458572	6369400	4929423	5118805	8572151	5372494	8552886	5280710	25326	17754	30965	14326	21311	19744	44079	20439	0.185718	5.38451	5469050	6.94456e+06	-0.344593	0.78753	82729	6.20681e+06	42	8
114	Palmitic acid	115 Palmitic acid	C16H32O2	[M-H]-	1.6	3.6	15	0.2	255.233	255.232	-2.2	S21008	2.6	2.53	2.66	0.13	42389560	23467902	75342616	40701824	99566128	40595188	29536970	14758570	583021	527186	545430	520455	665445	480293	1245635	462329	0.977278	1.02325	4.54755e+07	46114214	-0.0201228	0.986149	1.89617e+06	4.57948e+07	48	8
115	Pantothenic acid	116 Pantothenic acid	C9H17NO5	[M+H]+	5.1	7.1	15	0.2	220.118	220.118	-2	S21007	6.12	5.96	6.25	0.29	22466378	21727958	18822126	21692774	9325994	6652322	11967950	8152220	42492	26050	25209	18167	20757	25997	39248	16045	0.000119981	8334.62	21177309	9.02462e+06	1.23058	2.34661	90236.9	1.5101e+07	295347	8
116	Phenol	117 Phenol	C6H6O	[M-H]-	2.1	4.1	15	0.2	93.0346	93.0334	-12.8	SQ989_Blank_5	3.17	3.14	3.2	0.06	1.71891e+07	1.71891e+07	1.71891e+07	1.71891e+07	1.71891e+07	1.71891e+07	1.71891e+07	1.71891e+07	5772696	5596890	5698050	5676446	5929918	5950799	5532058	5654062	NA	NA	1.71891e+07	1.71891e+07	0	1	1.71891e+07	1.71891e+07	0	0
117	Phosphocreatine	118 Phosphocreatine	C4H10N3O5P	[M-H]-	11.2	13.2	15	0.2	210.029	210.03	6	S21013	12.65	12.55	12.65	0.1	10000	10000	10000	10000	10000	10000	10000	10000	0	0	0	0	0	0	0	0	NA	NA	10000	10000	0	1	10000	10000	0	0
118	Phosphoenolpyruvic acid	119 Phosphoenolpyruvic acid	C3H5O6P	[M-H]-	13.6	15.6	15	0.2	166.975	166.974	-6	S21019	14.74	14.67	14.83	0.16	11828416	11307026	11721967	12635091	6.22145e+06	10609534	19773282	11984641	2075505	62554	3969506	333587	5409522	439476	4069373	204346	0.926179	1.0797	11873125	1.21472e+07	-0.0329273	0.977435	6.22145e+06	1.20102e+07	13	7
119	Phosphoribosyl pyrophosphate	120 Phosphoribosyl pyrophosphate	C5H13O14P3	[M-H]-	15	18	15	0.2	388.945	388.941	-10.1	S21007	15.32	15.32	15.57	0.25	10863.6	10863.6	10863.6	10863.6	10863.6	10863.6	10863.6	10863.6	0	0	0	2303	0	0	0	0	NA	NA	10863.6	10863.6	0	1	10863.6	10863.6	0	0
120	Phosphorylcholine	121 Phosphorylcholine	C5H14NO4P	[M+H]+	10	13	15	0.2	184.073	184.073	-1.8	S21007	11.71	11.64	11.74	0.1	111449728	91585432	82325976	100726568	140324192	112461336	166112272	135779792	3057545	61923	4142064	76165	3525888	59629	10642064	145813	0.0157236	63.5986	96521926	138669398	-0.522721	0.696058	8.15166e+06	117595662	10745	8
121	Phosphoserine	122 Phosphoserine	C3H8NO6P	[M+H]+	11.5	13.5	15	0.2	186.016	186.016	0.5	S21018	11.82	11.57	12	0.44	38525.1	38525.1	38525.1	38525.1	38525.1	50242	38525.1	38525.1	10437	6328	11603	7173	14870	7208	18448	0	0.355918	2.80964	38525.1	41454.3	-0.105724	0.929339	38525.1	39989.7	0	1
122	Pipecolic acid	123 Pipecolic acid	C6H11NO2	[M+H]+	7.5	9.5	15	0.2	130.086	130.086	-1.2	S21008	8.8	8.72	8.86	0.15	9009073	7538573	7108717	8041346	5117072	2992153	5979938	4751134	109825	103956	139458	98499	135636	117080	144663	109914	0.00514658	194.304	7.92443e+06	4.71007e+06	0.750557	1.68244	369637	6.31725e+06	2065	8
123	Propionylcarnitine	124 Propionylcarnitine	C10H19NO4	[M+H]+	5.2	7.2	15	0.2	218.139	218.138	-2.2	S21006	6.46	6.24	6.61	0.37	25474532	26096670	20442714	23273282	20983188	13434671	23312696	15183337	16452	14213	17114	14787	16525	14620	18883	13066	0.080734	12.3864	2.38218e+07	18228473	0.386089	1.30685	57122.5	2.10251e+07	340	8
124	Pyruvic acid	125 Pyruvic acid	C3H4O3	[M-H]-	5.5	7.5	15	0.2	87.0088	87.0077	-12.3	S21016	5.94	5.79	5.95	0.16	1793133	1461599	1254804	1415344	2369515	1648238	3668896	1422633	29277	31188	33440	28962	39056	28363	40216	28515	0.175499	5.69803	1481220	2.27732e+06	-0.620551	0.650422	107131	1.87927e+06	16	8
125	Ribose 1-phosphate	126 Ribose 1-phosphate	C5H11O8P	[M-H]-	11	12.4	15	0.2	229.012	229.011	-2.1	S21019	12.09	12.05	12.11	0.06	4693286	4988012	4508496	5770822	2683490	3502274	7377750	3815162	104110	9873	95871	7823	232052	6885	68788	5220	0.570326	1.75338	4990154	4344669	0.199838	1.14857	208983	4.66741e+06	9	8
126	Saccharopine	127 Saccharopine	C11H20N2O6	[M-H]-	11	14	15	0.2	275.125	275.125	-0.2	S21006	12.61	12.42	12.64	0.23	3728403	4499850	3645748	4567421	8726657	6017626	7675404	5696310	50062	2200	73888	0	86877	0	190420	0	0.0082547	121.143	4.11036e+06	7.029e+06	-0.774056	0.584771	161293	5.56968e+06	1154	8
127	S-Adenosylhomocysteine	128 S-Adenosylhomocysteine	C14H20N6O5S	[M-H]-	8.6	10.6	15	0.2	383.114	383.12	15.1	S21016	9.4	9.26	9.65	0.39	138439	175038	147471	125051	15534	93529	138391	170236	0	0	0	0	0	0	0	0	0.276704	3.61398	146500	104422	0.488466	1.40295	10000	125461	1	8
128	S-Adenosylmethionine	129 S-Adenosylmethionine	C15H22N6O5S	[M+H]+	10.7	12.7	15	0.2	399.144	399.144	-2.5	S21008	12.39	12.35	12.5	0.16	7019414	9039964	7786022	7817352	5925762	6358243	9172977	7798991	639503	20876	1127956	49878	1534090	61046	2428599	76284	0.504522	1.98207	7915688	7.31399e+06	0.114055	1.08227	2236837	7.61484e+06	16	8
129	Sarcosine	130 Sarcosine	C3H7NO2	[M+H]+	11.2	12	15	0.2	90.055	90.0554	4.9	S21014	11.22	11.2	11.23	0.03	22608042	25188824	17533270	17997138	29600158	18715426	33013638	29242828	318196	167575	538822	196853	529419	164960	349976	174893	0.107779	9.27822	2.08318e+07	2.7643e+07	-0.408126	0.753602	925260	2.42374e+07	298	8
130	Succinic acid	131 Succinic acid	C4H6O4	[M-H]-	11.3	13.3	15	0.2	117.019	117.018	-9.7	S21008	12.41	12.35	12.42	0.07	20613222	24922438	20783738	24491968	14007634	8139160	17615696	11801133	191065	124007	154186	157111	203069	151298	217012	113650	0.00529264	188.942	2.27028e+07	1.28909e+07	0.816519	1.76115	501774	1.77969e+07	5922	8
131	Taurine	132 Taurine	C2H7NO3S	[M-H]-	10.2	12.2	15	0.2	124.007	124.006	-11.2	S21015	11.41	11.27	11.49	0.21	60464	45293.9	55237	55360	49686	45293.9	45293.9	74673	10300	14813	13101	9058	10732	10440	13735	11938	0.965183	1.03607	54088.7	53736.7	0.00942033	1.00655	45293.9	53912.7	0	5
132	Thymidine	133 Thymidine	C10H14N2O5	[M-H]-	3.5	5.5	15	0.2	241.083	241.082	-2.9	S21015	4.41	4.18	4.65	0.47	118327	64424	80244	98723	79063	62887.8	98280	62887.8	26231	17177	14056	21269	10892	18415	11821	21173	0.347181	2.88034	90429.5	75779.6	0.254983	1.19332	62887.8	83104.6	0	6
133	Uracil	134 Uracil	C4H4N2O2	[M+H]+	5.4	7.4	15	0.2	113.035	113.035	0.4	S21002	6.64	6.51	6.85	0.34	21467642	24317376	19072980	22527970	9168264	6157798	11591334	7544756	20280	10477	15406	14318	17684	18930	16862	9671	0.000169752	5890.96	21846492	8615538	1.34239	2.53571	56360.5	15231015	227517	8
134	Ureidopropionic acid	135 Ureidopropionic acid	C4H8N2O3	[M-H]-	10.4	12.4	15	0.2	131.046	131.045	-9.3	S21009	11.63	11.53	11.63	0.1	4395074	3283495	3470244	3225844	6177622	4314378	7969516	5651380	157169	14483	236837	17367	227449	23955	235692	25778	0.0231685	43.1621	3.59366e+06	6028224	-0.746277	0.59614	362024	4.81094e+06	348	8
135	Ureidosuccinic acid	136 Ureidosuccinic acid	C5H8N2O5	[M-H]-	12.8	14.8	15	0.2	175.036	175.035	-4.8	S21013	13.88	13.65	14	0.35	126226	128218	109370	97512	60831	28528	37412	41328	3791	0	3410	0	0	0	3835	3119	0.000325892	3068.5	115332	42024.8	1.45648	2.74437	15308.1	78678.1	663	8
136	Uric acid	137 Uric acid	C5H4N4O3	[M+H]+	8.8	10.8	15	0.2	169.036	169.037	8.8	S21012	10.01	10.01	10.01	0	10000	10000	10000	10000	10000	10000	10000	10000	0	0	0	0	0	0	0	0	NA	NA	10000	10000	0	1	10000	10000	0	0
137	Uridine	138 Uridine	C9H12N2O6	[M-H]-	5.5	7.5	15	0.2	243.062	243.062	-1.9	S21001	6.67	6.59	6.79	0.2	39929036	38633720	29280460	34964468	16181656	12962113	20161408	11808874	14227	4031	12701	3219	8641	2787	6779	3565	0.000521178	1918.73	35701921	1.52785e+07	1.2245	2.33674	30981.2	2.54902e+07	114287	8
138	Uridine 5'-diphosphate	139 Uridine 5'-diphosphate	C9H14N2O12P2	[M+H]+	12.4	14.4	15	0.2	405.01	405.008	-3.2	S21006	13.51	13.49	13.75	0.26	963471	873604	519419	655522	1559663	742871	1294884	740656	23810	3946	112978	16917	79384	16962	137474	21225	0.197434	5.06497	753004	1.08452e+06	-0.526325	0.694321	164761	918761	7	8
139	Uridine 5'-monophosphate	140 Uridine 5'-monophosphate	C9H13N2O9P	[M-H]-	11.2	13.2	15	0.2	323.029	323.029	-0.3	S21001	12.21	12.19	12.29	0.11	32322396	29969974	31898226	31806634	10185190	9349423	14717890	11416222	210458	7052	186812	11871	244120	8337	415427	9418	4.43998e-06	225226	3.14993e+07	1.14172e+07	1.46411	2.75894	420061	2.14582e+07	13333845	8
140	Uridine diphosphate glucose	141 Uridine diphosphate glucose	C15H24N2O17P2	[M-H]-	12.4	14.4	15	0.2	565.048	565.048	-0.4	S21007	13.5	13.48	13.53	0.06	6847879	4943366	4498843	5236163	10206424	6539212	9737675	7099594	47846	0	60222	0	68526	0	197558	0	0.0288825	34.6231	5.38156e+06	8.39573e+06	-0.64163	0.640988	150307	6.88864e+06	372	8
141	Uridine diphosphate-N-acetylglucosamine	142 Uridine diphosphate-N-acetylglucosamine	C17H27N3O17P2	[M+H]+	11.2	13.2	15	0.2	608.089	608.087	-2.7	S21014	12.27	12.17	12.31	0.14	942157	876146	677488	796083	873921	626225	968872	734868	14381	0	10845	0	18510	0	27998	0	0.823817	1.21386	822968	800972	0.0390863	1.02746	36900.2	811970	1	8
142	Uridine triphosphate	143 Uridine triphosphate	C9H15N2O15P3	[M-H]-	15	18	15	0.2	482.961	482.959	-5.5	S21014	15.2	15.01	15.42	0.41	37798	53288	36216	29274.2	29274.2	29274.2	63128	29274.2	0	0	12642	0	9093	2361	23316	3986	0.891284	1.12198	39144.1	37737.7	0.0527875	1.03727	29274.2	38440.9	0	4
143	Valerylcarnitine	144 Valerylcarnitine	C12H23NO4	[M+H]+	3.6	5.7	15	0.2	246.17	246.169	-2.8	S21007	4.93	4.7	5	0.3	264790	252653	194761	229701	157113	96173	154180	95972	13628	15857	11668	13643	12993	9388	14437	14272	0.00316853	315.603	235476	125860	0.903767	1.87095	49707.2	180668	107	8
144	Xanthine	145 Xanthine	C5H4N4O2	[M-H]-	7.5	9.4	15	0.2	151.026	151.025	-6.9	S21006	8.45	8.36	8.52	0.16	4638042	3904127	4285875	4666156	9124897	7846754	9877120	8288788	23770	17146	20267	15845	20889	16680	22823	15782	9.88216e-05	10119.2	4373550	8.78439e+06	-1.00614	0.497877	67450.8	6.57897e+06	133716	8
145	Xanthosine	146 Xanthosine	C10H12N4O6	[M-H]-	6.7	8.7	15	0.2	283.068	283.066	-8.5	S21009	7.44	7.44	7.47	0.03	10000	10000	10000	10000	10000	10000	10000	10000	0	0	0	0	0	0	0	0	NA	NA	10000	10000	0	1	10000	10000	0	0
146	Xanthylic acid	147 Xanthylic acid	C10H13N4O9P	[M-H]-	11	13	15	0.2	363.035	363.036	4	S21015	11.75	11.75	11.75	0	10000	10000	10000	10000	10000	10000	10000	10000	0	0	0	0	0	0	0	0	NA	NA	10000	10000	0	1	10000	10000	0	0

## Sheet: WT vs. dcp2
	Skeleton_Metabolite	Metabolite	Formula	Ion Type	RT Start (min)	RT End (min)	m/z Tolerance (ppm)	RT Tolerance (min)	mz	obs_mz	ppm	winner	RT	RT_min	RT_max	RT_range	WT1	WT2	WT3	WT4	DC1	DC2	DC3	DC4	Blank_0	Blank_1	Blank_2	Blank_3	Blank_4	Blank_5	Blank_6	Blank_7	ttest_pval	1/pvalue	Control_Mean	Treatment_dcp2_Mean	Log2FoldChange	LogFoldChange	blank_threshold	combined_mean	impact_score	Detection
0	1-Methylnicotinamide	1 1-Methylnicotinamide	C7H8N2O	[M+H]+	19	21	15	0.2	137.071	137.071	-1.7	S21002	19.25	19.09	19.42	0.33	151188	191775	133864	178797	99541	125460	103953	127682	38242	22880	34068	31086	40449	20984	30824	20243	0.015966	62.6332	163906	114159	0.521824	1.43577	99541	139032	13	7
1	2,3-Diphosphoglyceric acid	2 2,3-Diphosphoglyceric acid	C3H8O10P2	[M-H]-	12	15	15	0.2	264.952	264.95	-6.8	S21019	14.67	14.6	14.84	0.23	43950	47971	46823	67682	40214	48188	33879	74078	6112	2310	9552	3024	19347	1898	18392	2534	0.816191	1.2252	51606.5	49089.8	0.072131	1.05127	33688.4	50348.1	0	8
2	3-Hydroxybutyric acid	3 3-Hydroxybutyric acid	C4H8O3	[M-H]-	5.7	7.7	15	0.2	103.04	103.038	-15.2	S21008	5.81	5.71	5.9	0.18	37738	37738	37738	37738	37738	37738	37738	42918	10687	9027	7931	7947	9384	8121	10526	10345	0.355918	2.80964	37738	39033	-0.0486764	0.966823	37738	38385.5	0	1
3	3-Phosphoglyceric acid	4 3-Phosphoglyceric acid	C3H7O7P	[M-H]-	13	15	15	0.2	184.986	184.985	-4.7	S21019	14.12	13.88	14.18	0.3	22833332	24572438	23690548	24806950	18389668	25344404	21211098	30671376	4370613	13132	6107761	1272479	10522380	1515760	8095642	1331696	0.979737	1.02068	23975817	2.39041e+07	0.00431969	1.003	1.2471e+07	2.394e+07	25	8
4	4,5-Dihydroorotic acid	5 4,5-Dihydroorotic acid	C5H6N2O4	[M-H]-	7.5	9.5	15	0.2	157.025	157.025	-3.1	S21014	8.44	8.29	8.54	0.24	28792	20004	16371.6	18620	33839	32641	28265	28495	0	0	2752	2651	2638	3024	3294	2632	0.0183193	54.5872	20946.9	30810	-0.556662	0.679874	16371.6	25878.5	2	7
5	4-Hydroxyproline	6 4-Hydroxyproline	C5H9NO3	[M+H]+	10.2	11.2	15	0.2	132.065	132.065	-0.2	S21016	10.37	10.26	10.44	0.19	12487164	14396793	10581293	12953763	7735389	8481325	8385316	7238878	61939	37911	77597	48904	93056	48456	92924	57444	0.00147309	678.843	1.26048e+07	7960227	0.663086	1.58347	204337	1.02825e+07	11053	8
6	5'-Methylthioadenosine	7 5'-Methylthioadenosine	C11H15N5O3S	[M+H]+	3	5	15	0.2	298.097	298.096	-3.1	S21007	4.14	3.97	4.17	0.2	6749668	7157858	5728988	5560512	9555304	10451288	10822032	8781046	101997	9037	144074	20142	183857	19521	268685	28152	0.000969418	1031.55	6.29926e+06	9.90242e+06	-0.652599	0.636133	300799	8100837	13136	8
7	5-Phosphoribosylamine	8 5-Phosphoribosylamine	C5H12NO7P	[M-H]-	11.5	13.5	15	0.2	228.028	228.026	-7.7	S21002	12.83	12.59	13.03	0.44	39793	43645	35558	33183	29921	31989	35961	35753	0	0	3778	0	12334	1941	5013	1681	0.142024	7.04107	38044.8	33406	0.18759	1.13886	19280.1	35725.4	0	8
8	6-Phosphogluconic acid	9 6-Phosphogluconic acid	C6H13O10P	[M-H]-	14	17	15	0.2	275.017	275.017	-2	S21019	14.91	14.7	15.09	0.39	782661	96953	250696	348617	76270	97840	63199	206832	11016	0	17674	0	41093	2105	35161	4398	0.136774	7.31132	369732	111035	1.73546	3.32986	51792.6	240384	6	8
9	Acetoacetic acid	10 Acetoacetic acid	C4H6O3	[M-H]-	8.3	10.3	15	0.2	101.024	101.023	-14	S21019	9.71	9.5	9.87	0.37	145063	162008	84760	174956	157301	225251	238851	167373	7593	4985	9572	9208	14674	8325	13632	8721	0.0998211	10.0179	141697	197194	-0.476809	0.718565	38766.2	169445	2	8
10	Acetyl-CoA	11 Acetyl-CoA	C23H38N7O17P3S	[M+H]+	8	11	15	0.2	810.133	810.129	-4.9	S21009	9.55	9.51	9.66	0.14	76919	134984	10000	10000	84260	59508	85304	10000	0	0	0	0	0	0	0	0	0.960718	1.04089	57975.8	59768	-0.0439237	0.970013	10000	58871.9	0	5
11	Acetylcysteine	12 Acetylcysteine	C5H9NO3S	[M+H]+	6	8	15	0.2	164.038	164.038	0	S21016	7	6.88	7.16	0.28	47343	27339	30189	19684	21692	30858	46639	21805	0	0	5992	0	0	0	0	0	0.917881	1.08947	31138.8	30248.5	0.0418474	1.02943	12247	30693.6	0	8
12	Adenine	13 Adenine	C5H5N5	[M+H]+	5	7	15	0.2	136.062	136.061	-2	S21019	5.81	5.77	6.05	0.29	5879732	8001253	3422715	4258571	5084545	22029840	20528374	10053664	653497	138789	560304	185950	422910	169490	369642	228547	0.0760535	13.1486	5.39057e+06	1.44241e+07	-1.41997	0.373719	1.03342e+06	9.90734e+06	349	8
13	Adenosine	14 Adenosine	C10H13N5O4	[M+H]+	4.5	7	15	0.2	268.104	268.103	-2.4	S21019	5.78	5.76	5.88	0.12	8947122	3.43465e+06	20284444	25848942	3.43465e+06	131148312	128406488	3978367	3451116	367305	2443088	234860	1638992	185502	639540	171985	0.206041	4.8534	1.46288e+07	6.6742e+07	-2.18978	0.219184	3.43465e+06	4.06854e+07	901	6
14	Adenosine diphosphate ribose	15 Adenosine diphosphate ribose	C15H23N5O14P2	[M-H]-	10.9	12.9	15	0.2	558.064	558.061	-6.5	S21009	12.02	11.94	12.14	0.2	11359.4	18623	11359.4	11359.4	11359.4	11359.4	11359.4	11359.4	0	0	0	0	0	0	3625	0	0.355918	2.80964	13175.3	11359.4	0.21395	1.15986	11359.4	12267.3	0	1
15	Adenosine monophosphate	16 Adenosine monophosphate	C10H14N5O7P	[M+H]+	9.8	11.8	15	0.2	348.07	348.069	-2.8	S21004	10.84	10.77	10.87	0.1	65328544	57386284	70810928	81144192	56854508	52056568	50204352	67559312	3175328	82898	3420386	124618	2990514	91197	4257656	99859	0.106696	9.37242	68667487	56668685	0.277075	1.21174	5350921	62668086	712	8
16	Adenosine triphosphate	17 Adenosine triphosphate	C10H16N5O13P3	[M-H]-	12.5	14.5	15	0.2	505.988	505.986	-4.9	S21014	13.74	13.67	13.97	0.3	36256	68187	36256	36256	74725	80475	64089	106554	0	0	17271	3242	14201	0	30696	4606	0.0214175	46.6908	44238.8	81460.8	-0.880794	0.543068	36256	62849.8	5	5
17	Adenylsuccinic acid	18 Adenylsuccinic acid	C14H18N5O11P	[M-H]-	14.5	16.5	15	0.2	462.067	462.064	-5.3	S21006	15.68	15.55	15.75	0.2	126986	139031	101416	124706	149192	179774	154449	159626	3895	0	15345	2709	16534	0	22525	2514	0.0106371	94.0105	123035	160760	-0.385845	0.765331	33820.8	141898	17	8
18	ADP	19 ADP	C10H15N5O10P2	[M-H]-	11.1	13.1	15	0.2	426.022	426.022	-0.3	S21014	12.24	12.18	12.46	0.28	1001135	1574640	646743	449488	1060922	1896890	1369771	3156444	27124	6385	182645	35285	126591	22203	307944	34062	0.118685	8.4257	918002	1.87101e+06	-1.02725	0.490646	288340	1.3945e+06	24	8
19	Allantoin	20 Allantoin	C4H6N4O3	[M-H]-	9.3	11.3	15	0.2	157.037	157.036	-7.7	S21006	10.3	10.19	10.39	0.21	12665	12073	12073	12073	12073	12987	12073	12073	0	2961	0	0	0	2567	0	0	0.777432	1.28629	12221	12301.5	-0.0094719	0.993456	12073	12261.2	0	2
20	Aminoadipic acid	21 Aminoadipic acid	C6H11NO4	[M-H]-	5.9	7.9	15	0.2	160.061	160.06	-7.1	S21007	7.42	7.29	7.53	0.24	5444028	5806707	4568336	3921158	6437920	9854908	10738350	8178808	3884	5963	4253	5572	6878	7448	3555	6049	0.00993022	100.703	4.93506e+06	8.8025e+06	-0.834846	0.560643	26350.8	6.86878e+06	1234	8
21	Argininosuccinic acid	22 Argininosuccinic acid	C10H18N4O6	[M-H]-	12.5	14.5	15	0.2	289.115	289.115	-0.6	S21006	13.67	13.62	13.76	0.14	429530	693211	401477	755652	3054496	5827731	3588196	2621418	54259	1762	25697	0	64113	0	86065	3550	0.00429491	232.834	569968	3.77296e+06	-2.72675	0.151066	98292.2	2.17146e+06	3347	8
22	Beta-Alanine	23 Beta-Alanine	C3H7NO2	[M+H]+	9.8	10.5	15	0.2	90.055	90.0554	4.9	S21008	10.05	9.93	10.3	0.37	1282898	1003352	993650	1109550	1134871	1229746	1360545	1782354	45282	40567	55615	41227	59960	39751	60544	44760	0.127019	7.87283	1.09736e+06	1376879	-0.327362	0.796993	155390	1.23712e+06	12	8
23	Betaine	24 Betaine	C5H11NO2	[M+H]+	7	8.2	15	0.2	118.086	118.086	0.4	S21008	7.87	7.8	7.87	0.07	531556096	307210912	407607744	412264640	431537088	429732128	539958208	655930688	946404	956435	1042694	929935	999649	977086	1163093	979891	0.208449	4.79733	414659848	514289528	-0.310652	0.806277	3.0082e+06	464474688	2764	8
24	Butyrylcarnitine	25 Butyrylcarnitine	C11H21NO4	[M+H]+	4.2	6.2	15	0.2	232.154	232.154	-2.3	S21006	5.62	5.45	5.79	0.34	661058	670327	502734	641074	2053567	2754359	2481956	2633828	11304	8741	10512	10198	8837	9698	7868	9525	2.24576e-05	44528.3	618798	2.48093e+06	-2.00334	0.249422	38756.1	1.54986e+06	276691	8
25	Carbamoyl phosphate	26 Carbamoyl phosphate	CH4NO5P	[M-H]-	27	30	15	0.2	139.975	139.975	-6	S21001	27.01	27	27.13	0.13	188475	68768	43846	33288	28250	38210	53442	33552	4132	1765	10814	3728	10339	1902	7167	1858	0.257455	3.88417	83594.2	38363.5	1.12367	2.179	25639.4	60978.9	1	8
26	Carnosine	27 Carnosine	C9H14N4O3	[M+H]+	10.6	12.6	15	0.2	227.114	227.113	-2.9	S21006	11.93	11.86	12.08	0.21	351680	378755	258268	297524	364758	384418	345688	317893	20066	5998	15289	0	27889	0	25061	8647	0.339858	2.94241	321557	353189	-0.135368	0.910438	48606.2	337373	1	8
27	CDP	28 CDP	C9H15N3O11P2	[M+H]+	13	15	15	0.2	404.026	404.024	-3.6	S21008	14.16	14.15	14.34	0.19	162031	188370	107440	119017	246531	214970	197727	414260	9838	0	53384	10508	28414	6588	67135	11526	0.058048	17.2271	144214	268372	-0.896018	0.537368	80272.4	206293	7	8
28	Choline	29 Choline	C5H14NO	[Cat]+	11	15	15	0.2	104.107	104.107	2	S21008	14.99	14.98	15	0.02	88324544	127334872	115434224	154748624	136183360	182186032	201737584	205232880	864319	185605	463481	104110	869305	159474	803991	181097	0.0292575	34.1793	121460566	181334964	-0.578169	0.669813	1.37177e+06	151397765	7726	8
29	cis-Aconitic acid	30 cis-Aconitic acid	C6H6O6	[M-H]-	14.1	16.1	15	0.2	173.009	173.008	-5.6	S21006	15.16	15.12	15.22	0.11	14539459	11723328	11588687	11503999	21559178	28527202	24149316	26257298	3099624	58699	2432993	42860	2335246	41749	2003900	41924	0.000249828	4002.75	1.23389e+07	2.51232e+07	-1.02581	0.491133	3.78137e+06	1.87311e+07	152658	8
30	Citric acid	31 Citric acid	C6H8O7	[M-H]-	14.2	16.2	15	0.2	191.02	191.019	-3.8	S21008	15.34	15.22	15.58	0.36	135032592	125427984	134264256	111514384	221589264	300147712	270494336	325996832	3288378	230298	41312368	1120421	48277864	1181936	61168332	1906587	0.000565681	1767.78	126559804	279557036	-1.14332	0.452716	59442319	203058420	792911	8
31	Citrulline	32 Citrulline	C6H13N3O3	[M+H]+	10.9	12.9	15	0.2	176.103	176.103	-1.5	S21001	12.2	12.17	12.23	0.06	123621472	115319920	112174616	112477840	60554964	62699732	69326440	58889188	2461791	1123530	2640908	1159458	3978051	1391586	3582516	1425102	5.36753e-06	186305	115898462	62867581	0.882473	1.84353	6.6711e+06	8.9383e+07	30699499	8
32	Creatine	33 Creatine	C4H9N3O2	[M+H]+	10	11.5	15	0.2	132.077	132.077	-1.2	S21008	10.95	10.91	10.99	0.08	2658000	1535524	2195480	2038054	2386731	2155226	2793830	3663500	394898	376050	410814	400252	393449	367920	401631	369323	0.163123	6.13036	2.10676e+06	2.74982e+06	-0.384309	0.766146	1.17788e+06	2.42829e+06	19	8
33	Creatinine	34 Creatinine	C4H7N3O	[M+H]+	5.2	7.2	15	0.2	114.066	114.066	0.1	S21006	6.46	6.42	6.48	0.07	75228848	76039928	61681652	68857920	77809152	98845296	89651360	88722576	441152	358969	349774	373880	380130	371483	362266	366083	0.0152097	65.7476	70452087	88757096	-0.33322	0.793763	1.1364e+06	7.96046e+07	6594	8
34	Cyclic AMP	35 Cyclic AMP	C10H12N5O6P	[M-H]-	5.8	7.8	15	0.2	328.045	328.044	-2.9	S21019	6.06	5.84	6.16	0.32	157409	53796	243881	200165	123687	101566	176644	344596	2271	2139	0	0	2084	0	2269	0	0.750081	1.33319	163813	186623	-0.188081	0.877772	13286.1	175218	0	8
35	Cytidine	36 Cytidine	C9H13N3O5	[M+H]+	7.1	9.1	15	0.2	244.093	244.092	-1.6	S21009	8.35	8.32	8.42	0.1	5572136	5721322	4494207	4768076	3625912	3691110	4116315	3807154	92998	24123	63794	18793	49498	14446	25509	19837	0.00591642	169.021	5.13894e+06	3.81012e+06	0.431632	1.34876	125874	4474529	1020	8
36	Cytidine monophosphate	37 Cytidine monophosphate	C9H14N3O8P	[M+H]+	11.8	13.8	15	0.2	324.059	324.058	-3.2	S21006	12.9	12.83	13	0.17	3181286	2629604	2694252	2959538	2547708	3792896	3057313	3064510	109271	3811	99234	11496	120505	6214	161247	11668	0.41648	2.40108	2866170	3.11561e+06	-0.120389	0.91994	206292	2.99089e+06	8	8
37	Cytidine triphosphate	38 Cytidine triphosphate	C9H16N3O14P3	[M-H]-	15	20	15	0.2	481.977	481.976	-3	S21014	15.56	15.37	15.79	0.42	12384.6	12384.6	12384.6	12384.6	18460	14992	12384.6	30865	0	0	0	0	0	0	6359	0	0.147945	6.75926	12384.6	19175.4	-0.630707	0.64586	12384.6	15780	0	3
38	Cytosine	39 Cytosine	C4H5N3O	[M+H]+	9	11	15	0.2	112.05	112.051	0.5	S21008	9.52	9.28	9.75	0.47	256205	256205	256205	256205	256205	256205	256205	256205	86105	86397	82881	79058	80082	73147	78192	90684	NA	NA	256205	256205	0	1	256205	256205	0	0
39	D-2-Hydroxyglutaric acid	40 D-2-Hydroxyglutaric acid	C5H8O5	[M-H]-	11.6	13.6	15	0.2	147.03	147.029	-6.8	S21007	12.43	12.35	12.44	0.09	3096292	4602463	3927273	4671038	8919766	8087971	12516240	10925104	125172	50664	81566	44673	82040	61818	110623	59284	0.00128639	777.366	4.07427e+06	1.01123e+07	-1.31149	0.402903	240940	7.09327e+06	13686	8
40	D-Glucose	41 D-Glucose	C6H12O6	[M-H]-	9	11	15	0.2	179.056	179.055	-4	S21008	10.21	9.99	10.22	0.23	16556572	10806419	14425153	13865060	11067176	9919671	15825859	26424416	22103	15606	19496	14432	21361	19981	20280	21273	0.647824	1.54363	13913301	1.58093e+07	-0.184307	0.880072	67949.5	1.48613e+07	26	8
41	D-Glyceraldehyde 3-phosphate	42 D-Glyceraldehyde 3-phosphate	C3H7O6P	[M-H]-	13	14	15	0.2	168.991	168.991	-0.3	S21014	13.15	13.03	13.32	0.3	40541	21301.8	22186	21301.8	49704	57269	42752	47599	6663	0	7332	0	7243	0	5314	3586	0.00641751	155.824	26332.6	49331	-0.905643	0.533795	21301.8	37831.8	11	6
42	Dihydrofolic acid	43 Dihydrofolic acid	C19H21N7O6	[M+H]+	13	16	15	0.2	444.163	444.161	-3.2	S21006	15.9	15.68	15.9	0.22	16054.8	16054.8	16054.8	16054.8	16054.8	16054.8	16054.8	16054.8	0	5131	0	3233	0	2977	4805	0	NA	NA	16054.8	16054.8	0	1	16054.8	16054.8	0	0
43	Dihydroxyacetone phosphate	44 Dihydroxyacetone phosphate	C3H7O6P	[M-H]-	12	13	15	0.2	168.991	168.99	-5	S21014	12.44	12.34	12.55	0.21	2442026	93983	419062	91182	3023998	3129651	1665461	3457423	9913	0	15275	2089	21946	0	17421	0	0.0245726	40.6957	761563	2.81913e+06	-1.88822	0.270141	34991.5	1.79035e+06	270	8
44	D-Ribose 5-phosphate	45 D-Ribose 5-phosphate	C5H11O8P	[M-H]-	12.4	13.8	15	0.2	229.012	229.011	-2.1	S21006	12.74	12.69	12.98	0.28	6679558	6511872	6490988	7202386	6438356	7838487	6164046	5818074	112365	2790	159821	8509	337655	7293	300434	10312	0.752135	1.32955	6721201	6.56474e+06	0.033981	1.02383	362192	6.64297e+06	9	8
45	D-Sedoheptulose 7-phosphate	46 D-Sedoheptulose 7-phosphate	C7H15O10P	[M-H]-	12.2	14.2	15	0.2	289.033	289.033	-1.1	S21006	13.29	13.25	13.44	0.19	2136508	2340922	1480298	2895684	5304846	6455378	5922214	5603404	55239	2490	74746	8105	59994	8855	180934	8947	8.01825e-05	12471.6	2213353	5.82146e+06	-1.39515	0.380206	159741	4.01741e+06	131779	8
46	dTDP	47 dTDP	C10H16N2O11P2	[M-H]-	11	13	15	0.2	401.016	401.014	-5.1	S21004	11.74	11.59	11.85	0.26	72952	70677	81900	121097	52430	90916	74164	74331	5252	0	10544	0	10740	2590	10027	3431	0.370133	2.70173	86656.5	72960.2	0.248197	1.18772	25969	79808.4	0	8
47	FAD	48 FAD	C27H33N9O15P2	[M+H]+	7.6	9.6	15	0.2	786.164	786.162	-3.3	S21006	8.77	8.58	8.82	0.23	112020	127227	89345	123130	117095	142131	133909	112227	0	0	0	0	0	0	0	0	0.269271	3.71374	112930	126340	-0.161882	0.893858	10000	119636	0	8
48	Folic acid	49 Folic acid	C19H19N7O6	[M+H]+	13	16	15	0.2	442.147	442.152	10.9	S21001	13.37	13.13	13.53	0.39	27887	10596	14350	10000	17553	22998	14854	17959	0	0	0	0	0	0	0	0	0.58021	1.72351	15708.2	18341	-0.22355	0.856455	10000	17024.6	0	7
49	Fructose 1,6-bisphosphate	50 Fructose 1,6-bisphosphate	C6H14O12P2	[M-H]-	14.1	16.1	15	0.2	338.989	338.988	-3.5	S21008	15.34	15.19	15.58	0.39	116380	115704	420564	156003	605168	338558	383515	2678882	4508	0	61567	6218	23950	2684	173764	9185	0.208206	4.80294	202163	1.00153e+06	-2.30862	0.201854	115704	601847	14	7
50	Fructose 6-phosphate	51 Fructose 6-phosphate	C6H13O9P	[M-H]-	12.6	13.5	15	0.2	259.022	259.022	-1.7	S21006	13.24	13.01	13.31	0.3	4494516	1833216	2807036	3921001	6408468	9435287	7705991	8977428	544371	19943	441880	20892	368272	17791	512615	24471	0.00167073	598.542	3.26394e+06	8.13179e+06	-1.31696	0.40138	741338	5.69787e+06	8497	8
51	Fumaric acid	52 Fumaric acid	C4H4O4	[M-H]-	12.2	14.2	15	0.2	115.004	115.002	-11.2	S21006	13.17	13.17	13.31	0.14	8150326	7280081	6155558	7994624	15573414	20293206	16916308	15958874	499656	28718	127334	18410	73472	24826	55744	15976	0.000155382	6435.75	7.39515e+06	1.71855e+07	-1.21654	0.430314	326551	1.22903e+07	183813	8
52	Glucose 6-phosphate	53 Glucose 6-phosphate	C6H13O9P	[M-H]-	13.6	14.4	15	0.2	259.022	259.022	-0.6	S21008	13.93	13.86	13.93	0.07	15511645	6999394	11052373	11419230	20883774	24473076	19312874	28386472	2419216	42456	2150449	75278	2063197	64791	3781504	118145	0.00406729	245.864	1.12457e+07	23264049	-1.04873	0.483392	4.02814e+06	1.72549e+07	8776	8
53	Glutathione	54 Glutathione	C10H17N3O6S	[M+H]+	10	13	15	0.2	308.091	308.09	-3.2	S21001	11.41	11.35	11.45	0.09	61081116	53315432	49344552	52239172	51990008	56755908	54019636	52998756	156551	85576	440535	230308	600120	330924	959870	482096	0.98474	1.0155	53995068	53941077	0.00144331	1.001	1.24224e+06	5.39681e+07	55	8
54	Glycerol 3-phosphate	55 Glycerol 3-phosphate	C3H9O6P	[M-H]-	11.5	13	15	0.2	171.006	171.006	-5.3	S21006	12.06	11.89	12.3	0.41	218922	268906	184114	188256	1313073	3267950	3088143	2800896	6834	2385	6586	0	8476	2092	14353	4037	0.00168019	595.172	215050	2.61752e+06	-3.60546	0.0821579	26786.1	1.41628e+06	10260	8
55	Glycine	56 Glycine	C2H5NO2	[M+H]+	10.7	12.7	15	0.2	76.0393	76.0399	7.8	S21015	11.94	11.92	11.99	0.08	4454935	3835482	3919960	3984922	4716576	5418421	5947480	5988848	282418	142627	302614	161817	351987	145698	378217	148775	0.00418642	238.867	4.04882e+06	5.51783e+06	-0.446598	0.733771	727807	4783328	1557	8
56	Guanidoacetic acid	57 Guanidoacetic acid	C3H7N3O2	[M+H]+	10.7	12.7	15	0.2	118.061	118.061	0.8	S21008	12.01	11.95	12.04	0.09	2845724	1320204	2412496	2123670	3106158	2702018	3581580	4925017	54245	17365	71111	22964	54439	22980	131280	27184	0.0520686	19.2054	2.17552e+06	3.57869e+06	-0.71807	0.60791	160588	2.87711e+06	91	8
57	Guanine	58 Guanine	C5H5N5O	[M+H]+	7.7	9.7	15	0.2	152.057	152.056	-1.2	S21016	8.67	8.6	8.9	0.3	34319652	29645062	36574040	41075204	16557833	23665956	20884808	23231108	164034	47535	209126	50056	272436	57326	158621	56603	0.00253147	395.027	3.54035e+07	2.10849e+07	0.74768	1.67909	390901	2.82442e+07	18734	8
58	Guanosine	59 Guanosine	C10H13N5O5	[M+H]+	7.7	9.7	15	0.2	284.099	284.098	-3	S21013	9.03	8.91	9.08	0.17	5713625	5201582	5187412	5606839	2822327	4348568	4298853	3465814	84190	16592	78493	12891	76329	11249	56370	7831	0.00484668	206.327	5.42736e+06	3.73389e+06	0.539572	1.45354	138979	4.58063e+06	1374	8
59	Guanosine diphosphate	60 Guanosine diphosphate	C10H15N5O11P2	[M-H]-	13.8	15.8	15	0.2	442.017	442.015	-5.6	S21015	15.1	14.99	15.33	0.34	82669	127845	75638	71503.4	95880	121966	87616	209152	3872	0	33266	14724	31493	6227	59662	14765	0.248521	4.0238	89413.8	128654	-0.524921	0.694997	71503.4	109034	1	7
60	Guanosine monophosphate	61 Guanosine monophosphate	C10H14N5O8P	[M+H]+	12.6	14.6	15	0.2	364.065	364.064	-3	S21015	13.73	13.66	13.77	0.11	3696334	3449334	3166818	3653446	2778108	2644004	2369056	3380114	122541	8678	211819	17643	183518	12110	369146	20582	0.0292634	34.1724	3491483	2.79282e+06	0.322117	1.25016	364764	3.14215e+06	134	8
61	Guanosine triphosphate	62 Guanosine triphosphate	C10H16N5O14P3	[M-H]-	15	17	15	0.2	521.983	521.979	-9.4	S21014	16.6	16.35	16.84	0.49	12914.5	12914.5	12914.5	12914.5	12914.5	12914.5	12914.5	12914.5	0	0	2431	2107	0	0	3234	0	NA	NA	12914.5	12914.5	0	1	12914.5	12914.5	0	0
62	Homocysteine	63 Homocysteine	C4H9NO2S	[M-H]-	7.3	9.3	15	0.2	134.028	134.027	-11.4	S21016	8.5	8.32	8.52	0.2	10000	10000	10000	10000	10000	10000	10000	10000	0	0	0	0	0	0	0	0	NA	NA	10000	10000	0	1	10000	10000	0	0
63	Hypotaurine	64 Hypotaurine	C2H7NO2S	[M+H]+	10	12	15	0.2	110.027	110.026	-5.7	S21012	11.02	10.85	11.25	0.4	40811	42278	54671	39722	29976	11871.2	44284	49645	0	0	0	0	0	0	4990	0	0.297161	3.36518	44370.5	33944.1	0.386442	1.30717	11871.2	39157.3	0	7
64	Hypoxanthine	65 Hypoxanthine	C5H4N4O	[M+H]+	5.8	7.8	15	0.2	137.046	137.046	-2.1	S21019	6.92	6.86	7	0.14	216144288	227251536	209111792	248242736	244076688	298793120	278877056	256920800	561440	129832	470799	139704	725246	156424	577781	150168	0.0238079	42.0029	225187588	269666916	-0.260051	0.835058	1.10177e+06	247427252	12445	8
65	Inosine	66 Inosine	C10H12N4O5	[M+H]+	6.4	8.4	15	0.2	269.088	269.087	-3.1	S21019	7.59	7.5	7.69	0.19	44378672	42725448	40152280	43631900	29018974	32331950	29714598	28389716	80159	0	61710	6939	93731	0	74556	8292	5.25617e-05	19025.2	42722075	2.98638e+07	0.516584	1.43056	132020	3.62929e+07	987779	8
66	Inosinic acid	67 Inosinic acid	C10H13N4O8P	[M+H]+	11.4	13.4	15	0.2	349.054	349.053	-3.1	S21002	12.56	12.51	12.77	0.25	784255	1226088	764353	811644	408686	455174	337307	370839	14359	4217	14756	5757	21775	0	28592	3803	0.00432375	231.281	896585	393002	1.18991	2.28138	44972.1	644793	340	8
67	L-Acetylcarnitine	68 L-Acetylcarnitine	C9H17NO4	[M+H]+	6.3	8.3	15	0.2	204.123	204.123	-2.1	S21006	7.57	7.47	7.6	0.12	1356361088	1381872640	1177530496	1313142784	1291292800	1450914560	1433489152	1243890560	178312	25552	272093	54627	317282	52871	395040	52166	0.5136	1.94704	1307226752	1354896768	-0.0516735	0.964816	515479	1331061760	2686	8
68	L-Alanine	69 L-Alanine	C3H7NO2	[M+H]+	10.6	11.2	15	0.2	90.055	90.0553	3.8	S21013	11.06	11.03	11.09	0.06	81039768	69166024	66069772	69489224	76001712	80922464	85353736	84227448	1947715	837478	2501886	843669	2410774	807253	2155295	920619	0.0401289	24.9197	71441197	81626340	-0.192279	0.875222	4.66926e+06	7.65338e+07	2179	8
69	L-Arginine	70 L-Arginine	C6H14N4O2	[M+H]+	18.5	21	15	0.2	175.119	175.119	-1.4	S21009	20.17	20.17	20.4	0.23	984592960	979015296	888694912	943977024	838455872	1076845312	904813632	1020575616	343338752	94952224	403437632	139260144	443666752	151799808	434235200	140715408	0.855566	1.16882	949070048	960172608	-0.0167792	0.988437	806787220	954621328	1129	8
70	L-Asparagine	71 L-Asparagine	C4H8N2O3	[M+H]+	10.3	12.3	15	0.2	133.061	133.06	-2	S21009	11.64	11.57	11.67	0.1	18034802	15964195	16659570	14967322	22603612	25609634	27647278	29184756	465822	79669	804152	91739	708635	90980	847160	112751	0.00073818	1354.68	1.64065e+07	26261320	-0.678674	0.624739	1.21034e+06	2.13339e+07	46260	8
71	L-Aspartic acid	72 L-Aspartic acid	C4H7NO4	[M-H]-	10.8	12.8	15	0.2	132.03	132.029	-8.6	S21016	11.93	11.89	11.97	0.08	159893472	153973296	139081984	142682368	147548304	159364448	176870736	170864816	4493281	432247	4942630	531045	5041587	569639	6527054	580120	0.118143	8.46431	148907780	163662076	-0.136301	0.909849	8.6791e+06	156284928	1454	8
72	L-Carnitine	73 L-Carnitine	C7H16NO3	[Cat]+	8.3	10.3	15	0.2	162.113	162.112	-1.7	S21016	9.7	9.67	9.72	0.06	395927296	463056576	348904224	411155552	419056032	505530496	556826112	474145088	415471	89678	456456	109360	674818	93909	686349	105283	0.0645197	15.4991	404760912	488889432	-0.272438	0.827919	996746	446825172	8365	8
73	L-Cystathionine	74 L-Cystathionine	C7H14N2O4S	[M+H]+	12.2	14.2	15	0.2	223.075	223.074	-1.4	S21016	13.44	13.44	13.6	0.16	5747194	5536890	4986348	4516238	3570592	4763321	4565562	4586356	230414	10602	407845	40081	346000	30614	405386	34863	0.0774425	12.9128	5.19667e+06	4.37146e+06	0.249472	1.18877	574677	4.78406e+06	73	8
74	L-Cysteine	75 L-Cysteine	C3H7NO2S	[M+H]+	13	17	15	0.2	122.027	122.027	-1.9	S21002	16.9	16.76	16.99	0.23	27852	39674	32067	29458	31030	32515	33756	25941.2	5856	4652	7184	3840	6503	4260	5320	4895	0.659117	1.51718	32262.8	30810.6	0.0664444	1.04713	25941.2	31536.7	0	7
75	L-Cystine	76 L-Cystine	C6H12N2O4S2	[M-H]-	11.7	13.7	15	0.2	239.017	239.015	-4.9	SQ989_Blank_5	12.94	12.69	13	0.31	20905	20905	20905	20905	20905	20905	20905	20905	5037	0	5212	4215	0	6719	3348	4549	NA	NA	20905	20905	0	1	20905	20905	0	0
76	L-Glutamic acid	77 L-Glutamic acid	C5H9NO4	[M+H]+	10	13	15	0.2	148.06	148.06	-2.3	S21007	11.68	11.59	11.7	0.11	654928256	638335168	593272768	626465536	594596480	675894464	678451520	660990848	17245526	821533	18847084	1184088	19974700	1164571	27229938	1723148	0.344183	2.90543	628250432	652483328	-0.0546013	0.962861	3.30815e+07	640366880	1932	8
77	L-Glutamine	78 L-Glutamine	C5H10N2O3	[M+H]+	10.1	12.1	15	0.2	147.076	147.076	-2.2	S21013	11.4	11.35	11.47	0.12	559668864	504041248	500403552	506203264	604465216	621022080	628780096	606999232	30092348	683117	44805924	1354054	38158496	1259683	30336682	1421964	0.00067357	1484.63	517579232	615316656	-0.249549	0.841159	5.55521e+07	566447944	999768	8
78	L-Histidine	79 L-Histidine	C6H9N3O2	[M+H]+	9.9	11.9	15	0.2	156.077	156.077	-1.6	S21015	10.94	10.92	11.18	0.25	469274720	499700864	454575552	392796160	272274400	371619104	408566304	421319680	6630341	661024	20692758	2072504	31607652	2755984	26378404	2948461	0.0791573	12.6331	454086824	368444872	0.301519	1.23244	35165173	411265848	6403	8
79	L-Isoleucine	80 L-Isoleucine	C6H13NO2	[M+H]+	6	7.5	15	0.2	132.102	132.102	-1.6	S21014	7.38	7.33	7.41	0.08	218774416	182620304	178196272	189743792	251921952	276655328	293111424	303136544	1178276	916923	1277192	870757	1309576	946878	1410010	986914	0.000842601	1186.8	192333696	281206312	-0.548017	0.683959	3.3462e+06	236770004	410842	8
80	L-Kynurenine	81 L-Kynurenine	C10H12N2O3	[M+H]+	6	8	15	0.2	209.092	209.091	-2.7	S21002	7.37	7.27	7.4	0.13	16761823	17676076	14708108	16886976	7567256	10202094	9691687	9044438	52930	30473	50235	29810	57993	38494	49057	37074	0.000131028	7631.95	1.65082e+07	9.12637e+06	0.855074	1.80885	139775	1.28173e+07	176944	8
81	L-Lactic acid	82 L-Lactic acid	C3H6O3	[M-H]-	6.2	8.2	15	0.2	89.0244	89.0233	-12.6	S21014	7.04	7	7.08	0.08	4.70597e+06	4.70597e+06	4.70597e+06	4.70597e+06	4.70597e+06	4773504	5066537	4933366	1602657	1562534	1573654	1573948	1541684	1524426	1501105	1642578	0.0897129	11.1467	4.70597e+06	4.86984e+06	-0.0493836	0.966349	4.70597e+06	4.78791e+06	55	3
82	L-Leucine	83 L-Leucine	C6H13NO2	[M+H]+	7.5	9	15	0.2	132.102	132.102	-1.6	S21013	7.45	7.45	7.7	0.25	151413088	106935592	134880608	136370080	191207840	214120640	228818352	244636128	742976	605004	919731	579753	1040047	654485	957289	665967	0.00100439	995.63	132399842	219695740	-0.730605	0.602651	2.32197e+06	176047791	290846	8
83	L-Lysine	84 L-Lysine	C6H14N2O2	[M+H]+	18	20	15	0.2	147.113	147.113	-2.1	S21009	19.21	19.17	19.34	0.17	466568256	468098272	443011488	429620128	346293312	470647424	390445184	446625376	124107856	14626129	159557648	24295790	190818784	30850518	148514592	23676322	0.242039	4.13157	451824536	413502824	0.127865	1.09268	2.68678e+08	432663680	1953	8
84	L-Malic acid	85 L-Malic acid	C4H6O5	[M-H]-	12.2	14.2	15	0.2	133.014	133.013	-9.4	S21006	13.17	13.16	13.25	0.09	89831560	82190320	66374648	89165104	167308336	220318784	183512448	172735088	7883238	1124152	3543334	718963	4242227	836038	2467080	497144	0.000213352	4687.09	81890408	185968664	-1.18329	0.440345	8002066	133929536	1425564	8
85	L-Methionine	86 L-Methionine	C5H11NO2S	[M+H]+	6.8	8.8	15	0.2	150.058	150.058	-1.5	S21009	8.06	7.97	8.11	0.14	170829680	167599152	146296240	157925936	146069456	162124832	159538192	158679024	266568	64675	279574	82240	381054	83512	262339	99568	0.559969	1.78581	160662752	156602876	0.0369248	1.02592	579824	158632814	291	8
86	L-Phenylalanine	87 L-Phenylalanine	C9H11NO2	[M+H]+	5.6	7.6	15	0.2	166.086	166.086	-1.5	S21015	6.81	6.76	6.86	0.1	299060416	254319392	242790944	272902592	348109728	390399904	421776512	432807424	1109886	836541	1188137	878140	1230040	943485	1301431	981271	0.00115662	864.588	267268336	398273392	-0.57547	0.671068	3.18585e+06	332770864	428734	8
87	L-Proline	88 L-Proline	C5H9NO2	[M+H]+	7.9	9.9	15	0.2	116.071	116.071	0.8	S21009	9.22	9.18	9.24	0.07	486158720	504388448	466314528	507188672	550986432	596671616	599133248	607513728	7075474	5678172	7338664	5607189	8124797	5706298	7899396	6109093	0.000849022	1177.83	491012592	588576256	-0.261469	0.834238	2.00872e+07	539794424	762113	8
88	L-Serine	89 L-Serine	C3H7NO3	[M+H]+	10.8	12.8	15	0.2	106.05	106.05	2.2	S21015	12.07	12.04	12.09	0.05	26455344	24079814	21725256	22584784	23096726	26756110	27804946	27269518	1532604	974497	1969294	899836	2014806	956194	1906231	1042765	0.141003	7.09205	2.37113e+07	26231825	-0.145743	0.903913	4.24609e+06	2.49716e+07	196	8
89	L-Threonine	90 L-Threonine	C4H9NO3	[M-H]-	9.5	11.5	15	0.2	118.051	118.05	-10.7	S21014	10.84	10.77	10.88	0.12	15979350	14401182	12157439	13880629	23979424	28354772	30175466	24701488	874314	198477	915581	232416	1038527	251586	998930	283930	0.000272727	3666.67	14104650	2.68028e+07	-0.926212	0.526238	1.80766e+06	2.04537e+07	142515	8
90	L-Tryptophan	91 L-Tryptophan	C11H12N2O2	[M+H]+	6.8	8.8	15	0.2	205.097	205.097	-1.7	S21013	8.13	8.08	8.19	0.11	19016468	14570385	15284980	16807384	21657660	23993960	26401740	28824246	122046	97306	141409	117412	158508	104472	149194	99368	0.00297377	336.273	1.64198e+07	2.52194e+07	-0.619097	0.651078	381143	2.08196e+07	10753	8
91	L-Tyrosine	92 L-Tyrosine	C9H11NO3	[M+H]+	8.2	10.2	15	0.2	182.081	182.081	-1.5	S21013	9.47	9.4	9.52	0.12	77650496	71396976	65917808	71663760	107275888	122400336	128378088	121977560	1200096	593354	1266230	660915	1540388	675272	1556278	741804	7.74362e-05	12913.9	71657260	120007968	-0.743945	0.597104	3.09788e+06	95832614	2072618	8
92	L-Valine	93 L-Valine	C5H11NO2	[M+H]+	8.3	9.2	15	0.2	118.086	118.086	0.4	S21013	8.96	8.89	8.97	0.07	187044240	174902496	156845088	175814688	219993312	249051536	256304560	242533744	1725438	1004749	1839931	1019150	1868688	1089140	1849842	1031537	0.000490656	2038.09	173651628	241970788	-0.478637	0.717655	4.29568e+06	207811208	590168	8
93	N6-Acetyl-L-lysine	94 N6-Acetyl-L-lysine	C8H16N2O3	[M+H]+	1.9	3.9	15	0.2	189.123	189.122	-8.8	S21016	2.92	2.86	2.96	0.1	2117628	1.56149e+06	1.56149e+06	1.56149e+06	1689143	1.56149e+06	1.56149e+06	1.56149e+06	519447	546931	454369	476753	532686	465946	539709	601453	0.481098	2.07858	1.70052e+06	1.5934e+06	0.0938686	1.06723	1.56149e+06	1.64696e+06	4	2
94	N-Acetylglutamic acid	95 N-Acetylglutamic acid	C7H11NO5	[M+H]+	10.3	12.3	15	0.2	190.071	190.071	-2.1	S21014	11.32	11.1	11.4	0.3	3720366	3129967	2994724	3022174	3419184	2860352	2789818	3178991	19201	10008	15241	14388	19696	10615	20486	14596	0.516301	1.93685	3.21681e+06	3.06209e+06	0.0711148	1.05053	56586.6	3139447	6	8
95	N-Acetylglutamine	96 N-Acetylglutamine	C7H12N2O4	[M-H]-	6.8	8.8	15	0.2	187.072	187.072	-4.4	S21014	7.9	7.73	8.08	0.34	3987010	3628364	2672238	3153185	5010004	5845164	5390478	4817652	4318	2676	4428	4706	2986	2742	3508	4128	0.00197363	506.68	3.3602e+06	5.26582e+06	-0.648113	0.638115	21059.5	4.31301e+06	3425	8
96	N-Acetyl-L-alanine	97 N-Acetyl-L-alanine	C5H9NO3	[M+H]+	6	7	15	0.2	132.065	132.065	-1.7	S21002	6.47	6.39	6.71	0.32	1073726	1153480	939896	1132374	520752	593634	610006	616959	34542	29647	51234	33858	54394	44618	51017	37509	8.97649e-05	11140.2	1074869	585338	0.87682	1.83632	136307	830103	16981	8
97	N-Acetyl-L-methionine	98 N-Acetyl-L-methionine	C7H13NO3S	[M+H]+	3	5	15	0.2	192.069	192.069	-1.5	S21014	4.27	4.02	4.49	0.47	340883	332024	223129	272602	310366	336856	302007	311804	11817	0	10147	12177	9571	7648	10866	10880	0.44953	2.22455	292160	315258	-0.109778	0.926731	37414.8	303709	1	8
98	N-Acetyl-L-phenylalanine	99 N-Acetyl-L-phenylalanine	C11H13NO3	[M+H]+	2.8	4	15	0.2	208.097	208.096	-1.5	S21015	3.28	3.21	3.3	0.08	1022736	1026952	968940	968940	968940	968940	968940	968940	332418	292556	305775	358326	302228	357741	297255	310874	0.13443	7.43879	996892	968940	0.04103	1.02885	968940	982916	8	2
99	N-Acetylornithine	100 N-Acetylornithine	C7H14N2O3	[M+H]+	8.6	10.6	15	0.2	175.108	175.107	-1.3	S21009	10.03	9.87	10.05	0.18	6625530	7334833	5930022	7305522	7644542	8945557	8489792	8402790	79802	62809	89659	54429	116244	61671	107254	55244	0.0104652	95.5551	6.79898e+06	8.37067e+06	-0.300026	0.812238	245167	7.58482e+06	892	8
100	N-Acetylserine	101 N-Acetylserine	C5H9NO4	[M-H]-	7.5	8.5	15	0.2	146.046	146.045	-7.4	S21013	8.02	7.92	8.06	0.14	1620954	1288334	1213562	1269152	3219628	3671864	3461764	3416535	41696	42090	43900	39717	55249	37327	47637	38323	3.78871e-06	263942	1.348e+06	3.44245e+06	-1.35261	0.391582	139727	2.39522e+06	1614477	8
101	NAD	102 NAD	C21H28N7O14P2	[Cat]+	9.9	11.9	15	0.2	664.116	664.114	-3	S21002	10.98	10.86	11.03	0.16	5641429	8322845	3725593	5396338	7058380	7270224	7781003	6167556	65922	0	68183	0	38649	0	222099	0	0.245715	4.06975	5.77155e+06	7.06929e+06	-0.292606	0.816426	158070	6420421	32	8
102	NADH	103 NADH	C21H29N7O14P2	[M-H]-	9.5	11.5	15	0.2	664.117	664.114	-5.3	S21015	10.55	10.53	10.75	0.23	180145	19355	10000	27291	89198	74089	34749	208769	0	0	0	0	0	0	0	0	0.470261	2.12648	59197.8	101701	-0.780723	0.582075	10000	80449.5	0	7
103	NADP	104 NADP	C21H29N7O17P3	[Cat]+	12.7	14.7	15	0.2	744.083	744.08	-3.4	S21008	13.92	13.89	14.13	0.25	382590	420304	298619	345417	303698	360891	267708	443451	7464	4541	28007	5062	22734	4122	47833	4296	0.71403	1.4005	361732	343937	0.0727789	1.05174	56522.1	352835	1	8
104	NADPH	105 NADPH	C21H30N7O17P3	[M-H]-	13	15	15	0.2	744.084	744.085	2	S21011	14.46	14.3	14.6	0.3	10000	10000	10000	10000	10000	10000	10000	10000	0	0	0	0	0	0	0	0	NA	NA	10000	10000	0	1	10000	10000	0	0
105	Niacinamide	106 Niacinamide	C6H6N2O	[M+H]+	3.3	5.3	15	0.2	123.055	123.055	0.1	SQ989_Blank_4	4.42	4.36	4.45	0.08	1.07034e+07	1.07034e+07	1.07034e+07	1.07034e+07	1.07034e+07	1.07034e+07	1.07034e+07	1.07034e+07	3671734	2947974	3893300	3335005	4257630	3291484	3803460	3315160	NA	NA	1.07034e+07	1.07034e+07	0	1	1.07034e+07	1.07034e+07	0	0
106	Nicotinic acid	107 Nicotinic acid	C6H5NO2	[M-H]-	5.5	7.5	15	0.2	122.025	122.023	-11.9	S21008	5.47	5.47	5.71	0.24	68305	35428	84155	86226	38615	52037	106490	174850	7991	4211	12122	9266	12430	6896	7097	7795	0.488014	2.04912	68528.5	92998	-0.440496	0.736881	35428	80763.2	0	7
107	O-Phosphoethanolamine	108 O-Phosphoethanolamine	C2H8NO4P	[M+H]+	11.4	13.4	15	0.2	142.026	142.026	-0.5	S21002	12.74	12.62	12.9	0.28	58323	59421	53426	45292	25172	36878	26364	44655	3982	0	4341	0	4371	0	8401	0	0.0100359	99.6428	54115.5	33267.2	0.701939	1.62669	17910.6	43691.4	7	8
108	Ornithine	109 Ornithine	C5H12N2O2	[M+H]+	17	19	15	0.2	133.097	133.097	-1.2	S21006	17.59	17.54	17.78	0.24	42865640	44555364	40115024	47977420	51886408	64866308	58395776	63064328	9525285	1227486	13375504	2601702	15679397	2744050	21367018	3753625	0.00330512	302.561	43878362	59553205	-0.440669	0.736793	2.63628e+07	5.17158e+07	21237	8
109	Orotic acid	110 Orotic acid	C5H4N2O4	[M-H]-	6.7	8.7	15	0.2	155.01	155.009	-7.3	S21013	7.57	7.47	7.68	0.22	4785078	4425946	3894072	4789272	2109389	2507672	2148745	1570054	0	2821	0	0	2514	0	3588	1994	0.000160524	6229.59	4473592	2083965	1.1021	2.14667	14093.9	3.27878e+06	43847	8
110	Orotidylic acid	111 Orotidylic acid	C10H13N2O11P	[M+H]+	0	30	15	0.2	369.033	369.036	7.1	S21008	11.11	11.11	11.11	0	10000	10000	10000	10000	10000	10000	10000	34755	0	0	0	0	0	0	0	0	0.355918	2.80964	10000	16188.8	-0.694992	0.617713	10000	13094.4	0	1
111	Oxidized glutathione	112 Oxidized glutathione	C20H32N6O12S2	[M+H]+	13.5	15.5	15	0.2	613.159	613.158	-2.4	S21014	14.63	14.63	14.73	0.1	7982562	8208834	8312048	8200242	6466088	8608408	8292204	8360038	250303	35124	532200	122175	486176	162684	716315	228545	0.641295	1.55935	8.17592e+06	7.93168e+06	0.0437541	1.03079	960071	8053803	13	8
112	Oxoadipic acid	113 Oxoadipic acid	C6H8O5	[M-H]-	7.5	9.5	15	0.2	159.03	159.029	-5	S21015	7.7	7.58	7.94	0.37	22166.9	22166.9	22166.9	22166.9	22166.9	22166.9	22166.9	22166.9	5565	4482	3404	4246	3046	2587	3224	5891	NA	NA	22166.9	22166.9	0	1	22166.9	22166.9	0	0
113	Oxoglutaric acid	114 Oxoglutaric acid	C5H6O5	[M-H]-	10.8	14.8	15	0.2	145.014	145.013	-7.2	S21007	12.74	12.5	12.78	0.27	5458572	6369400	4929423	5118805	16251277	11335203	19511250	15928907	25326	17754	30965	14326	21311	19744	44079	20439	0.000955012	1047.11	5469050	1.57567e+07	-1.5266	0.347095	82729	1.06129e+07	32017	8
114	Palmitic acid	115 Palmitic acid	C16H32O2	[M-H]-	1.6	3.6	15	0.2	255.233	255.232	-2.2	S21008	2.6	2.53	2.66	0.13	42389560	23467902	75342616	40701824	100532056	317652288	296251136	564295616	583021	527186	545430	520455	665445	480293	1245635	462329	0.0285654	35.0074	4.54755e+07	319682774	-2.81348	0.142252	1.89617e+06	1.82579e+08	44932	8
115	Pantothenic acid	116 Pantothenic acid	C9H17NO5	[M+H]+	5.1	7.1	15	0.2	220.118	220.118	-2	S21007	6.12	5.96	6.25	0.29	22466378	21727958	18822126	21692774	69776736	81182184	83031552	75546976	42492	26050	25209	18167	20757	25997	39248	16045	1.81288e-06	551609	21177309	77384362	-1.86952	0.273664	90236.9	4.92808e+07	99332683	8
116	Phenol	117 Phenol	C6H6O	[M-H]-	2.1	4.1	15	0.2	93.0346	93.0334	-12.8	SQ989_Blank_5	3.17	3.14	3.2	0.06	1.71891e+07	1.71891e+07	1.71891e+07	1.71891e+07	1.71891e+07	1.71891e+07	1.71891e+07	1.71891e+07	5772696	5596890	5698050	5676446	5929918	5950799	5532058	5654062	NA	NA	1.71891e+07	1.71891e+07	0	1	1.71891e+07	1.71891e+07	0	0
117	Phosphocreatine	118 Phosphocreatine	C4H10N3O5P	[M-H]-	11.2	13.2	15	0.2	210.029	210.03	6	S21013	12.65	12.55	12.65	0.1	10000	10000	10000	10000	10000	10000	10000	10000	0	0	0	0	0	0	0	0	NA	NA	10000	10000	0	1	10000	10000	0	0
118	Phosphoenolpyruvic acid	119 Phosphoenolpyruvic acid	C3H5O6P	[M-H]-	13.6	15.6	15	0.2	166.975	166.974	-6	S21019	14.74	14.67	14.83	0.16	11828416	11307026	11721967	12635091	10307149	12699718	10389165	14771930	2075505	62554	3969506	333587	5409522	439476	4069373	204346	0.883156	1.1323	11873125	1.2042e+07	-0.0203742	0.985977	6.22145e+06	1.19576e+07	14	8
119	Phosphoribosyl pyrophosphate	120 Phosphoribosyl pyrophosphate	C5H13O14P3	[M-H]-	15	18	15	0.2	388.945	388.941	-10.1	S21007	15.32	15.32	15.57	0.25	10863.6	10863.6	10863.6	10863.6	10863.6	10863.6	18792	10863.6	0	0	0	2303	0	0	0	0	0.355918	2.80964	10863.6	12845.7	-0.241782	0.8457	10863.6	11854.7	0	1
120	Phosphorylcholine	121 Phosphorylcholine	C5H14NO4P	[M+H]+	10	13	15	0.2	184.073	184.073	-1.8	S21007	11.71	11.64	11.74	0.1	111449728	91585432	82325976	100726568	355858688	402980928	407004672	398968128	3057545	61923	4142064	76165	3525888	59629	10642064	145813	5.85466e-07	1.70804e+06	96521926	391203104	-2.01899	0.246731	8.15166e+06	243862515	1688182316	8
121	Phosphoserine	122 Phosphoserine	C3H8NO6P	[M+H]+	11.5	13.5	15	0.2	186.016	186.016	0.5	S21018	11.82	11.57	12	0.44	38525.1	38525.1	38525.1	38525.1	38525.1	38525.1	38525.1	38525.1	10437	6328	11603	7173	14870	7208	18448	0	NA	NA	38525.1	38525.1	0	1	38525.1	38525.1	0	0
122	Pipecolic acid	123 Pipecolic acid	C6H11NO2	[M+H]+	7.5	9.5	15	0.2	130.086	130.086	-1.2	S21008	8.8	8.72	8.86	0.15	9009073	7538573	7108717	8041346	11015123	12392144	11435559	12913616	109825	103956	139458	98499	135636	117080	144663	109914	0.000522602	1913.5	7.92443e+06	1.19391e+07	-0.591317	0.663737	369637	9.93177e+06	28632	8
123	Propionylcarnitine	124 Propionylcarnitine	C10H19NO4	[M+H]+	5.2	7.2	15	0.2	218.139	218.138	-2.2	S21006	6.46	6.24	6.61	0.37	25474532	26096670	20442714	23273282	40983708	48401516	47457040	43113056	16452	14213	17114	14787	16525	14620	18883	13066	6.81416e-05	14675.3	2.38218e+07	44988830	-0.917284	0.529505	57122.5	3.44053e+07	953550	8
124	Pyruvic acid	125 Pyruvic acid	C3H4O3	[M-H]-	5.5	7.5	15	0.2	87.0088	87.0077	-12.3	S21016	5.94	5.79	5.95	0.16	1793133	1461599	1254804	1415344	1671072	2856072	2080110	1543813	29277	31188	33440	28962	39056	28363	40216	28515	0.129315	7.73306	1481220	2.03777e+06	-0.460203	0.726884	107131	1.75949e+06	19	8
125	Ribose 1-phosphate	126 Ribose 1-phosphate	C5H11O8P	[M-H]-	11	12.4	15	0.2	229.012	229.011	-2.1	S21019	12.09	12.05	12.11	0.06	4693286	4988012	4508496	5770822	2283910	3702142	2673640	3863534	104110	9873	95871	7823	232052	6885	68788	5220	0.0079285	126.127	4990154	3.13081e+06	0.67255	1.59389	208983	4.06048e+06	816	8
126	Saccharopine	127 Saccharopine	C11H20N2O6	[M-H]-	11	14	15	0.2	275.125	275.125	-0.2	S21006	12.61	12.42	12.64	0.23	3728403	4499850	3645748	4567421	9946750	14104983	11002065	9726609	50062	2200	73888	0	86877	0	190420	0	0.000486805	2054.21	4.11036e+06	1.11951e+07	-1.44553	0.367157	161293	7.65273e+06	42816	8
127	S-Adenosylhomocysteine	128 S-Adenosylhomocysteine	C14H20N6O5S	[M-H]-	8.6	10.6	15	0.2	383.114	383.12	15.1	S21016	9.4	9.26	9.65	0.39	138439	175038	147471	125051	244436	140482	334775	262159	0	0	0	0	0	0	0	0	0.0542109	18.4465	146500	245463	-0.744607	0.59683	10000	195981	6	8
128	S-Adenosylmethionine	129 S-Adenosylmethionine	C15H22N6O5S	[M+H]+	10.7	12.7	15	0.2	399.144	399.144	-2.5	S21008	12.39	12.35	12.5	0.16	7019414	9039964	7786022	7817352	10357904	9670564	11203237	11646949	639503	20876	1127956	49878	1534090	61046	2428599	76284	0.00361284	276.791	7915688	1.07197e+07	-0.437473	0.738427	2236837	9.31768e+06	3493	8
129	Sarcosine	130 Sarcosine	C3H7NO2	[M+H]+	11.2	12	15	0.2	90.055	90.0554	4.9	S21014	11.22	11.2	11.23	0.03	22608042	25188824	17533270	17997138	23871522	16703147	24382240	27153588	318196	167575	538822	196853	529419	164960	349976	174893	0.476997	2.09645	2.08318e+07	2.30276e+07	-0.144577	0.904645	925260	2.19297e+07	51	8
130	Succinic acid	131 Succinic acid	C4H6O4	[M-H]-	11.3	13.3	15	0.2	117.019	117.018	-9.7	S21008	12.41	12.35	12.42	0.07	20613222	24922438	20783738	24491968	22659130	25422066	27198940	27964152	191065	124007	154186	157111	203069	151298	217012	113650	0.109258	9.15267	2.27028e+07	25811072	-0.185117	0.879578	501774	2.4257e+07	252	8
131	Taurine	132 Taurine	C2H7NO3S	[M-H]-	10.2	12.2	15	0.2	124.007	124.006	-11.2	S21015	11.41	11.27	11.49	0.21	60464	45293.9	55237	55360	45293.9	45293.9	52118	90599	10300	14813	13101	9058	10732	10440	13735	11938	0.721284	1.38642	54088.7	58326.2	-0.108816	0.927349	45293.9	56207.5	0	5
132	Thymidine	133 Thymidine	C10H14N2O5	[M-H]-	3.5	5.5	15	0.2	241.083	241.082	-2.9	S21015	4.41	4.18	4.65	0.47	118327	64424	80244	98723	113227	95598	116022	177283	26231	17177	14056	21269	10892	18415	11821	21173	0.150408	6.64857	90429.5	125532	-0.473196	0.720367	62887.8	107981	1	8
133	Uracil	134 Uracil	C4H4N2O2	[M+H]+	5.4	7.4	15	0.2	113.035	113.035	0.4	S21002	6.64	6.51	6.85	0.34	21467642	24317376	19072980	22527970	13980458	17224650	16192480	15069229	20280	10477	15406	14318	17684	18930	16862	9671	0.00303214	329.8	21846492	1.56167e+07	0.484312	1.39892	56360.5	1.87316e+07	8642	8
134	Ureidopropionic acid	135 Ureidopropionic acid	C4H8N2O3	[M-H]-	10.4	12.4	15	0.2	131.046	131.045	-9.3	S21009	11.63	11.53	11.63	0.1	4395074	3283495	3470244	3225844	6653804	7819020	9156224	9318400	157169	14483	236837	17367	227449	23955	235692	25778	0.00049292	2028.73	3.59366e+06	8236862	-1.19664	0.43629	362024	5.91526e+06	27506	8
135	Ureidosuccinic acid	136 Ureidosuccinic acid	C5H8N2O5	[M-H]-	12.8	14.8	15	0.2	175.036	175.035	-4.8	S21013	13.88	13.65	14	0.35	126226	128218	109370	97512	77888	84581	69923	52816	3791	0	3410	0	0	0	3835	3119	0.00456438	219.088	115332	71302	0.693772	1.61751	15308.1	93316.8	33	8
136	Uric acid	137 Uric acid	C5H4N4O3	[M+H]+	8.8	10.8	15	0.2	169.036	169.037	8.8	S21012	10.01	10.01	10.01	0	10000	10000	10000	10000	10000	10000	10000	10000	0	0	0	0	0	0	0	0	NA	NA	10000	10000	0	1	10000	10000	0	0
137	Uridine	138 Uridine	C9H12N2O6	[M-H]-	5.5	7.5	15	0.2	243.062	243.062	-1.9	S21001	6.67	6.59	6.79	0.2	39929036	38633720	29280460	34964468	24161994	26965558	29906840	24719408	14227	4031	12701	3219	8641	2787	6779	3565	0.0143632	69.6222	35701921	26438450	0.433364	1.35038	30981.2	3.10702e+07	2921	8
138	Uridine 5'-diphosphate	139 Uridine 5'-diphosphate	C9H14N2O12P2	[M+H]+	12.4	14.4	15	0.2	405.01	405.008	-3.2	S21006	13.51	13.49	13.75	0.26	963471	873604	519419	655522	3158544	3609150	3228981	3217602	23810	3946	112978	16917	79384	16962	137474	21225	2.11567e-06	472664	753004	3.30357e+06	-2.1333	0.227936	164761	2.02829e+06	4205988	8
139	Uridine 5'-monophosphate	140 Uridine 5'-monophosphate	C9H13N2O9P	[M-H]-	11.2	13.2	15	0.2	323.029	323.029	-0.3	S21001	12.21	12.19	12.29	0.11	32322396	29969974	31898226	31806634	12628328	18304066	14006359	15737026	210458	7052	186812	11871	244120	8337	415427	9418	1.77826e-05	56234.8	3.14993e+07	1.51689e+07	1.0542	2.07657	420061	2.33341e+07	2724850	8
140	Uridine diphosphate glucose	141 Uridine diphosphate glucose	C15H24N2O17P2	[M-H]-	12.4	14.4	15	0.2	565.048	565.048	-0.4	S21007	13.5	13.48	13.53	0.06	6847879	4943366	4498843	5236163	19476794	19004218	19625274	18383230	47846	0	60222	0	68526	0	197558	0	3.83538e-07	2.6073e+06	5.38156e+06	19122379	-1.82916	0.281427	150307	1.2252e+07	113509242	8
141	Uridine diphosphate-N-acetylglucosamine	142 Uridine diphosphate-N-acetylglucosamine	C17H27N3O17P2	[M+H]+	11.2	13.2	15	0.2	608.089	608.087	-2.7	S21014	12.27	12.17	12.31	0.14	942157	876146	677488	796083	1816811	1642514	1737536	1577988	14381	0	10845	0	18510	0	27998	0	2.96241e-05	33756.3	822968	1.69371e+06	-1.04128	0.485896	36900.2	1.25834e+06	87420	8
142	Uridine triphosphate	143 Uridine triphosphate	C9H15N2O15P3	[M-H]-	15	18	15	0.2	482.961	482.959	-5.5	S21014	15.2	15.01	15.42	0.41	37798	53288	36216	29274.2	80752	83244	63183	91514	0	0	12642	0	9093	2361	23316	3986	0.0020493	487.971	39144.1	79673.2	-1.0253	0.491307	29274.2	59408.7	59	7
143	Valerylcarnitine	144 Valerylcarnitine	C12H23NO4	[M+H]+	3.6	5.7	15	0.2	246.17	246.169	-2.8	S21007	4.93	4.7	5	0.3	264790	252653	194761	229701	224717	275197	295975	248505	13628	15857	11668	13643	12993	9388	14437	14272	0.285904	3.49767	235476	261098	-0.149013	0.901867	49707.2	248287	1	8
144	Xanthine	145 Xanthine	C5H4N4O2	[M-H]-	7.5	9.4	15	0.2	151.026	151.025	-6.9	S21006	8.45	8.36	8.52	0.16	4638042	3904127	4285875	4666156	8754952	10966270	9116995	7874854	23770	17146	20267	15845	20889	16680	22823	15782	0.000385701	2592.68	4373550	9.17827e+06	-1.06942	0.476511	67450.8	6.77591e+06	36867	8
145	Xanthosine	146 Xanthosine	C10H12N4O6	[M-H]-	6.7	8.7	15	0.2	283.068	283.066	-8.5	S21009	7.44	7.44	7.47	0.03	10000	10000	10000	10000	10000	10000	10000	10000	0	0	0	0	0	0	0	0	NA	NA	10000	10000	0	1	10000	10000	0	0
146	Xanthylic acid	147 Xanthylic acid	C10H13N4O9P	[M-H]-	11	13	15	0.2	363.035	363.036	4	S21015	11.75	11.75	11.75	0	10000	10000	10000	10000	10000	10000	10000	10000	0	0	0	0	0	0	0	0	NA	NA	10000	10000	0	1	10000	10000	0	0

## Sheet: Summary FC metabs. (mut v WT)
Arbitrary order	Skeleton_Metabolite	Metab #	Formula	Log2FoldChange (WT/pat1)	ttest_pval		Log2FoldChange (WT/dhh1)	ttest_pval		Log2FoldChange (WT/edc3,scd6	ttest_pval		Log2FoldChange (WT/dcp2)	ttest_pval
1	Glycine	55	C2H5NO2	-0.640793	9.6007e-05		-0.625834	0.000506804		-0.274245	0.0599851		-0.446598	0.00418642
2	L-Alanine	68	C3H7NO2	-1.3241	1.54057e-07		-0.602434	0.00115213		-0.311305	0.0465789		-0.192279	0.0401289
3	L-Asparagine	70	C4H8N2O3	-0.614475	0.00617002		-0.738942	0.00120222		-0.27101	0.0767926		-0.678674	0.00073818
4	L-Aspartic acid	71	C4H7NO4	-0.29864	0.000504916		0.0263257	0.772317		0.406309	0.0113877		-0.136301	0.118143
5	L-Glutamine	77	C5H10N2O3	-0.851266	9.61335e-07		-0.727707	5.81791e-05		-0.427987	0.00123994		-0.249549	0.00067357
6	L-Isoleucine	79	C6H13NO2	-1.47973	6.74727e-08		-0.692156	0.000906639		-0.260992	0.163612		-0.548017	0.000842601
7	L-Leucine	82	C6H13NO2	-1.77533	8.54044e-06		-0.884592	0.00175683		-0.352682	0.128523		-0.730605	0.00100439
8	L-Methionine	85	C5H11NO2S	-0.483203	0.000458315		-0.436898	0.0104234		-0.391532	0.0368496		0.0369248	0.559969
9	L-Phenylalanine	86	C9H11NO2	-1.47033	6.54078e-07		-0.735067	0.00144786		-0.247524	0.250288		-0.57547	0.00115662
10	L-Proline	87	C5H9NO2	-0.283748	0.000402168		-0.360159	0.00896615		-0.174111	0.154144		-0.261469	0.000849022
11	L-Serine	88	C3H7NO3	-0.838968	6.48923e-06		-0.57453	0.00123885		-0.149354	0.29543		-0.145743	0.141003
12	L-Threonine	89	C4H9NO3	-1.74427	0.000246143		-0.935155	0.000311036		-0.918999	0.00346899		-0.926212	0.000272727
13	L-Tryptophan	90	C11H12N2O2	-2.34776	1.72066e-08		-0.690977	0.00165474		-0.347378	0.134168		-0.619097	0.00297377
14	L-Tyrosine	91	C9H11NO3	-1.76219	1.44425e-07		-0.767341	0.000265045		-0.607687	0.0059345		-0.743945	7.74362e-05
15	L-Valine	92	C5H11NO2	-1.23263	2.42809e-07		-0.633136	0.000606238		-0.393064	0.0255544		-0.478637	0.000490656
16	Argininosuccinic acid	21	C10H18N4O6	-1.53583	0.0111168		-0.201836	0.4634		-1.82336	0.00368822		-2.72675	0.00429491
17	Beta-Alanine	22	C3H7NO2	-0.263828	0.0785618		-0.515612	0.00225253		0.289209	0.114553		-0.327362	0.127019
18	N-Acetylglutamic acid	94	C7H11NO5	-0.266621	0.0206918		0.931028	0.000370401		0.897083	0.00134759		0.0711148	0.516301
19	N-Acetylglutamine	95	C7H12N2O4	-2.32226	1.10442e-06		-1.41014	9.5844e-05		-0.958326	0.00693626		-0.648113	0.00197363
20	N-Acetyl-L-methionine	97	C7H13NO3S	-0.423095	0.0178086		-0.0699461	0.747174		0.0762141	0.784626		-0.109778	0.44953
21	N-Acetyl-L-phenylalanine	98	C11H13NO3	-1.15343	1.35657e-06		-0.048771	0.508575		0.04103	0.13443		0.04103	0.13443
22	N-Acetylserine	100	C5H9NO4	-1.63881	1.79166e-05		-0.967352	0.000329504		-0.337916	0.192229		-1.35261	3.78871e-06
23	Ornithine	108	C5H12N2O2	-0.32661	0.00212385		0.186137	0.0606588		0.432794	0.0221969		-0.440669	0.00330512
24	Saccharopine	126	C11H20N2O6	-1.20812	0.000191733		-0.867935	0.00265143		-0.774056	0.0082547		-1.44553	0.000486805
25	S-Adenosylhomocysteine	127	C14H20N6O5S	-1.18498	0.455933		-0.0702957	0.862644		0.488466	0.276704		-0.744607	0.0542109
26	Sarcosine	129	C3H7NO2	-1.40506	2.00169e-05		-0.778906	0.0384285		-0.408126	0.107779		-0.144577	0.476997
27	D-Glyceraldehyde 3-phosphate	41	C3H7O6P	-1.32312	0.0141217		-1.04823	0.00508792		-0.708408	0.136581		-0.905643	0.00641751
28	Dihydroxyacetone phosphate	43	C3H7O6P	-2.8963	0.0079009		-2.35518	0.0315461		-1.73989	0.129968		-1.88822	0.0245726
29	Fructose 1,6-bisphosphate	49	C6H14O12P2	-1.7741	0.198012		-2.10915	0.0936229		0.751234	0.307171		-2.30862	0.208206
30	Fructose 6-phosphate	50	C6H13O9P	-0.756483	0.105507		-1.13671	0.00143107		-0.823445	0.068118		-1.31696	0.00167073
31	Glucose 6-phosphate	52	C6H13O9P	-0.363399	0.32063		-0.641459	0.0189251		-0.234889	0.461101		-1.04873	0.00406729
32	Pyruvic acid	124	C3H4O3	-1.04599	0.00739062		0.386444	0.0274914		-0.620551	0.175499		-0.460203	0.129315
33	4,5-Dihydroorotic acid	4	C5H6N2O4	-2.64011	0.000572448		0.0543004	0.834922		0.35554	0.143547		-0.556662	0.0183193
34	Adenine	12	C5H5N5	-1.17571	0.105026		-1.11361	0.0979038		-2.53838	0.0622168		-1.41997	0.0760535
35	Adenosine	13	C10H13N5O4	-1.61682	0.37513		-1.81886	0.244129		-3.67718	0.0657859		-2.18978	0.206041
36	Adenosine triphosphate	16	C10H16N5O13P3	-1.45247	0.0132984		-0.592095	0.152795		0.287091	0.355918		-0.880794	0.0214175
37	ADP	18	C10H15N5O10P2	-1.57845	0.00772044		-0.77692	0.171602		0.788654	0.194786		-1.02725	0.118685
38	CDP	27	C9H15N3O11P2	-1.11482	0.00923638		-0.741014	0.0468619		0.579089	0.064206		-0.896018	0.058048
39	Cyclic AMP	34	C10H12N5O6P	-0.244944	0.622013		-0.212881	0.577943		0.125826	0.877792		-0.188081	0.750081
40	Cytidine triphosphate	37	C9H16N3O14P3	-0.873119	0.143594		-0.312614	0.243505		0	NA		-0.630707	0.147945
41	Guanine	57	C5H5N5O	-0.68243	0.000141351		-0.0551616	0.593417		-0.230472	0.346167		0.74768	0.00253147
42	Guanosine	58	C10H13N5O5	-0.220307	0.155963		0.241092	0.00206798		0.0986921	0.632116		0.539572	0.00484668
43	Guanosine diphosphate	59	C10H15N5O11P2	-0.986059	0.0318567		-0.094596	0.709586		0.322487	0.217965		-0.524921	0.248521
44	Guanosine triphosphate	61	C10H16N5O14P3	-0.25136	0.221067		0	NA		0	NA		0	NA
45	Hypoxanthine	64	C5H4N4O	-0.422403	0.00349316		-0.107749	0.179099		-0.570414	0.00450783		-0.260051	0.0238079
46	Orotic acid	109	C5H4N2O4	-0.370438	0.0310587		4.18819	1.05222e-06		1.88516	1.49774e-05		1.1021	0.000160524
47	Thymidine	132	C10H14N2O5	-0.765881	0.151887		-0.355901	0.241658		0.254983	0.347181		-0.473196	0.150408
48	Ureidopropionic acid	134	C4H8N2O3	-1.32452	0.00185687		-1.44514	8.90159e-05		-0.746277	0.0231685		-1.19664	0.00049292
49	Ureidosuccinic acid	135	C5H8N2O5	-2.7859	0.0174765		2.40822	2.12659e-05		1.45648	0.000325892		0.693772	0.00456438
50	Uridine 5'-diphosphate	138	C9H14N2O12P2	-1.39652	0.000770777		-0.94903	0.0017155		-0.526325	0.197434		-2.1333	2.11567e-06
51	Uridine triphosphate	142	C9H15N2O15P3	-1.02334	0.0328115		-0.898876	0.0481005		0.0527875	0.891284		-1.0253	0.0020493
52	Xanthine	144	C5H4N4O2	-0.911421	0.00135973		-0.513618	0.000292212		-1.00614	9.88216e-05		-1.06942	0.000385701
53	Xanthylic acid	146	C10H13N4O9P	-0.808797	0.355918		0	NA		0	NA		0	NA
54	cis-Aconitic acid	29	C6H6O6	-0.741878	0.000450841		-0.895433	0.000104554		-0.725091	0.00482104		-1.02581	0.000249828
55	Citric acid	30	C6H8O7	-0.776155	0.00245151		-0.978879	0.000756774		-0.304025	0.238742		-1.14332	0.000565681
56	Fumaric acid	51	C4H4O4	-0.7925	4.33325e-05		-0.435178	0.0213427		-0.755004	0.00890377		-1.21654	0.000155382
57	L-Malic acid	84	C4H6O5	-0.728893	0.000117221		-0.415023	0.0370168		-0.684325	0.013157		-1.18329	0.000213352
58	NADH	102	C21H29N7O14P2	-1.33252	0.286298		0.317364	0.791373		2.28035	0.290135		-0.780723	0.470261
59	Oxoglutaric acid (α-ketoglutarate)	113	C5H6O5	-0.713564	0.00832793		#N/A	#N/A		-0.344593	0.185718		-1.5266	0.000955012
60	Succinic acid	130	C4H6O4	0.468069	0.00343389		0.74054	0.00203825		0.816519	0.00529264		-0.185117	0.109258
61	1-Methylnicotinamide	0	C7H8N2O	0.353125	0.0829612		0.338928	0.067439		0.604866	0.00651355		0.521824	0.015966
62	2,3-Diphosphoglyceric acid	1	C3H8O10P2	0.131359	0.485436		-0.280297	0.143739		-0.354544	0.523937		0.072131	0.816191
63	3-Hydroxybutyric acid	2	C4H8O3	0	NA		0	NA		0	NA		-0.0486764	0.355918
64	3-Phosphoglyceric acid	3	C3H7O7P	-0.0556965	0.615172		-0.185506	0.0142681		-0.00976568	0.977905		0.00431969	0.979737
65	4-Hydroxyproline	5	C5H9NO3	-0.032752	0.831794		1.59474	6.00634e-05		1.22098	0.000272024		0.663086	0.00147309
66	5'-Methylthioadenosine	6	C11H15N5O3S	0.0783765	0.556776		0.171765	0.404403		0.543709	0.0152074		-0.652599	0.000969418
67	5-Phosphoribosylamine	7	C5H12NO7P	0.735136	0.00292581		0.867233	0.000594588		0.760448	0.00287633		0.18759	0.142024
68	6-Phosphogluconic acid	8	C6H13O10P	0.667768	0.45006		0.712491	0.406894		0.315445	0.793396		1.73546	0.136774
69	Acetoacetic acid	9	C4H6O3	-0.516495	0.0946756		-0.165151	0.494044		-0.360212	0.33136		-0.476809	0.0998211
70	Acetyl-CoA	10	C23H38N7O17P3S	-0.108222	0.910073		0.244413	0.842184		1.22026	0.362765		-0.0439237	0.960718
71	Acetylcysteine	11	C5H9NO3S	-0.944688	0.0408118		0.0366937	0.931353		0.408754	0.331877		0.0418474	0.917881
72	Adenosine diphosphate ribose	14	C15H23N5O14P2	0.0809314	0.746321		-0.0334449	0.915579		0.0965059	0.692772		0.21395	0.355918
73	Adenosine monophosphate	15	C10H14N5O7P	0.563974	0.00741681		0.550992	0.00565699		1.00936	0.00263313		0.277075	0.106696
74	Adenylsuccinic acid	17	C14H18N5O11P	0.270723	0.118579		0.543913	0.0056318		1.42709	0.000847409		-0.385845	0.0106371
75	Allantoin	19	C4H6N4O3	0.0175781	0.355918		0.0175781	0.355918		-0.00483197	0.869998		-0.0094719	0.777432
76	Aminoadipic acid	20	C6H11NO4	1.32131	0.00065036		1.07071	0.00779042		0.523085	0.357822		-0.834846	0.00993022
77	Betaine	23	C5H11NO2	0.309949	0.300212		-0.0292062	0.882061		0.703621	0.0321707		-0.310652	0.208449
78	Butyrylcarnitine	24	C11H21NO4	-0.361597	0.0294847		-0.221161	0.303924		0.0926174	0.699874		-2.00334	2.24576e-05
79	Carbamoyl phosphate	25	CH4NO5P	0.722665	0.436715		1.53112	0.177897		0.146629	0.882159		1.12367	0.257455
80	Carnosine	26	C9H14N4O3	0.652435	0.00936581		0.173416	0.392354		-0.0110874	0.957299		-0.135368	0.339858
81	Choline	28	C5H14NO	-0.375551	0.0921782		0.164738	0.505913		0.787771	0.0578023		-0.578169	0.0292575
82	Citrulline	31	C6H13N3O3	0.257844	0.00159877		1.25103	1.59309e-06		0.84793	0.000197517		0.882473	5.36753e-06
83	Creatine	32	C4H9N3O2	0.348045	0.229158		-0.244878	0.411232		0.578988	0.0363081		-0.384309	0.163123
84	Creatinine	33	C4H7N3O	0.130205	0.180321		-0.116293	0.459819		0.479974	0.0218763		-0.33322	0.0152097
85	Cytidine	35	C9H13N3O5	0.201728	0.18597		-0.593189	0.00660582		0.108775	0.659505		0.431632	0.00591642
86	Cytidine monophosphate	36	C9H14N3O8P	0.0295069	0.809195		0.515447	0.00313489		0.829798	0.00260505		-0.120389	0.41648
87	Cytosine	38	C4H5N3O	0	NA		0	NA		0	NA		0	NA
88	D-2-Hydroxyglutaric acid	39	C5H8O5	-0.869501	0.00186459		-0.840399	0.0445896		-0.035506	0.818819		-1.31149	0.00128639
89	D-Glucose	40	C6H12O6	0.204386	0.639323		0.159188	0.550527		1.51192	0.00132736		-0.184307	0.647824
90	Dihydrofolic acid	42	C19H21N7O6	0	NA		0	NA		0	NA		0	NA
91	D-Ribose 5-phosphate	44	C5H11O8P	0.394816	0.00134298		0.720077	1.28682e-05		0.601223	0.0282545		0.033981	0.752135
92	D-Sedoheptulose 7-phosphate	45	C7H15O10P	-0.515277	0.0540013		0.695219	0.0427094		0.966029	0.0174056		-1.39515	8.01825e-05
93	dTDP	46	C10H16N2O11P2	0.0015908	0.994698		0.129366	0.696977		1.18197	0.0102679		0.248197	0.370133
94	FAD	47	C27H33N9O15P2	0.0378235	0.824221		0.90569	0.00368491		1.11654	0.009354		-0.161882	0.269271
95	Folic acid	48	C19H19N7O6	0.28404	0.538734		0.651522	0.220281		0.638882	0.226694		-0.22355	0.58021
96	Glutathione	53	C10H17N3O6S	0.194691	0.0410587		1.14929	6.18641e-05		1.06256	0.00809568		0.00144331	0.98474
97	Glycerol 3-phosphate	54	C3H9O6P	-1.60101	0.0337125		-0.844274	0.0275324		-0.735684	0.0149623		-3.60546	0.00168019
98	Guanidoacetic acid	56	C3H7N3O2	-0.17683	0.686436		-0.369274	0.142216		0.596653	0.119667		-0.71807	0.0520686
99	Guanosine monophosphate	60	C10H14N5O8P	0.0241371	0.869288		0.608542	0.000114467		1.39744	3.00748e-05		0.322117	0.0292634
100	Homocysteine	62	C4H9NO2S	0	NA		0	NA		0	NA		0	NA
101	Hypotaurine	63	C2H7NO2S	-0.238582	0.33613		-0.20368	0.276832		-0.100701	0.628553		0.386442	0.297161
102	Inosine	65	C10H12N4O5	0.3301	0.000498795		0.0716407	0.371023		-0.00856493	0.936973		0.516584	5.25617e-05
103	Inosinic acid	66	C10H13N4O8P	2.31087	0.000639591		2.04669	0.00106766		2.2205	0.000796796		1.18991	0.00432375
104	L-Acetylcarnitine	67	C9H17NO4	0.233473	0.0103371		0.400484	0.0209719		0.557228	0.00693148		-0.0516735	0.5136
105	L-Arginine	69	C6H14N4O2	0.0197141	0.666129		-0.101761	0.105906		0.109354	0.30289		-0.0167792	0.855566
106	L-Carnitine	72	C7H16NO3	-0.461862	0.00314542		0.000678491	0.996786		0.0899812	0.610855		-0.272438	0.0645197
107	L-Cystathionine	73	C7H14N2O4S	-0.704478	6.65216e-05		0.332325	0.0188174		0.639554	0.00518485		0.249472	0.0774425
108	L-Cysteine	74	C3H7NO2S	0.130289	0.461706		0.0445914	0.804549		-0.0460859	0.766245		0.0664444	0.659117
109	L-Cystine	75	C6H12N2O4S2	0	NA		0	NA		0	NA		0	NA
110	L-Glutamic acid	76	C5H9NO4	0.0538846	0.218888		0.296487	0.00571009		0.425818	0.00488661		-0.0546013	0.344183
111	L-Histidine	78	C6H9N3O2	-0.147194	0.0798284		0.013911	0.887449		0.151403	0.330201		0.301519	0.0791573
112	L-Kynurenine	80	C10H12N2O3	0.731426	9.58897e-05		0.308912	0.026659		0.308719	0.0827386		0.855074	0.000131028
113	L-Lactic acid	81	C3H6O3	-0.20071	0.334595		0	NA		0	NA		-0.0493836	0.0897129
114	L-Lysine	83	C6H14N2O2	0.00123273	0.974395		-0.105149	0.245801		0.163877	0.24884		0.127865	0.242039
115	N6-Acetyl-L-lysine	93	C8H16N2O3	-0.055855	0.755037		0.123058	0.355918		0.123058	0.355918		0.0938686	0.481098
116	N-Acetyl-L-alanine	96	C5H9NO3	0.0670545	0.41158		1.14941	8.74738e-05		1.47134	8.6598e-05		0.87682	8.97649e-05
117	N-Acetylornithine	99	C7H14N2O3	0.286649	0.0200501		-0.44908	0.0334867		-0.208366	0.321244		-0.300026	0.0104652
118	NAD	101	C21H28N7O14P2	-0.0660417	0.802626		0.850878	0.12426		1.57878	0.0289095		-0.292606	0.245715
119	NADP	103	C21H29N7O17P3	0.202619	0.207355		0.483389	0.0230039		1.56595	0.001776		0.0727789	0.71403
120	NADPH	104	C21H30N7O17P3	0	NA		0	NA		0	NA		0	NA
121	Niacinamide	105	C6H6N2O	0	NA		0	NA		0	NA		0	NA
122	Nicotinic acid	106	C6H5NO2	0.667084	0.0815886		0.0972972	0.729685		0.813942	0.0526081		-0.440496	0.488014
123	O-Phosphoethanolamine	107	C2H8NO4P	0.218827	0.320833		0.305193	0.105659		1.03656	0.00474804		0.701939	0.0100359
124	Orotidylic acid	110	C10H13N2O11P	0	NA		0	NA		0	NA		-0.694992	0.355918
125	Oxidized glutathione	111	C20H32N6O12S2	-0.210862	0.000499566		0.571065	0.000927233		0.677615	0.0124169		0.0437541	0.641295
126	Oxoadipic acid	112	C6H8O5	0	NA		0	NA		0	NA		0	NA
127	Palmitic acid	114	C16H32O2	-0.707894	0.25764		0.455183	0.442527		-0.0201228	0.977278		-2.81348	0.0285654
128	Pantothenic acid	115	C9H17NO5	-0.628877	5.99959e-05		0.894479	0.000163881		1.23058	0.000119981		-1.86952	1.81288e-06
129	Phenol	116	C6H6O	0	NA		0	NA		0	NA		0	NA
130	Phosphocreatine	117	C4H10N3O5P	0	NA		0	NA		0	NA		0	NA
131	Phosphoenolpyruvic acid	118	C3H5O6P	0.051161	0.593948		-0.239738	0.00112791		-0.0329273	0.926179		-0.0203742	0.883156
132	Phosphoribosyl pyrophosphate	119	C5H13O14P3	0	NA		0	NA		0	NA		-0.241782	0.355918
133	Phosphorylcholine	120	C5H14NO4P	-0.56111	0.00339003		-0.852303	0.000899399		-0.522721	0.0157236		-2.01899	5.85466e-07
134	Phosphoserine	121	C3H8NO6P	0	NA		-0.0723393	0.355918		-0.105724	0.355918		0	NA
135	Pipecolic acid	122	C6H11NO2	-0.601854	0.00054543		0.195348	0.174082		0.750557	0.00514658		-0.591317	0.000522602
136	Propionylcarnitine	123	C10H19NO4	-0.0736103	0.497174		-0.0114227	0.949698		0.386089	0.080734		-0.917284	6.81416e-05
137	Ribose 1-phosphate	125	C5H11O8P	0.142572	0.275633		0.368018	0.0130444		0.199838	0.570326		0.67255	0.0079285
138	S-Adenosylmethionine	128	C15H22N6O5S	0.205655	0.141187		0.126086	0.282076		0.114055	0.504522		-0.437473	0.00361284
139	Taurine	131	C2H7NO3S	-0.700035	0.158721		-0.129788	0.4005		0.00942033	0.965183		-0.108816	0.721284
140	Uracil	133	C4H4N2O2	0.973076	8.18223e-05		0.409902	0.0226349		1.34239	0.000169752		0.484312	0.00303214
141	Uric acid	136	C5H4N4O3	0	NA		-0.164078	0.355918		0	NA		0	NA
142	Uridine	137	C9H12N2O6	0.593369	0.00294732		0.297388	0.0877347		1.2245	0.000521178		0.433364	0.0143632
143	Uridine 5'-monophosphate	139	C9H13N2O9P	1.07454	1.24059e-06		1.21326	1.10038e-06		1.46411	4.43998e-06		1.0542	1.77826e-05
144	Uridine diphosphate glucose	140	C15H24N2O17P2	-1.37678	5.34395e-05		-0.979577	0.000363418		-0.64163	0.0288825		-1.82916	3.83538e-07
145	Uridine diphosphate-N-acetylglucosamine	141	C17H27N3O17P2	-1.46487	1.13144e-05		-0.112121	0.532282		0.0390863	0.823817		-1.04128	2.96241e-05
146	Valerylcarnitine	143	C12H23NO4	0.165886	0.225257		1.23222	0.0003358		0.903767	0.00316853		-0.149013	0.285904
147	Xanthosine	145	C10H12N4O6	0	NA		-0.128491	0.355918		0	NA		0	NA

## Sheet: lists up-regulated metabs. 
46 Metab_up in any 2 muts	TCA intermediates	20 Amino acids
CDP	Fumaric acid	Glycine
cis-Aconitic acid	Citric acid	L-Alanine
Citric acid	cis-Aconitic acid	L-Asparagine
D-2-Hydroxyglutaric acid	L-Malic acid	L-Aspartic acid
D-Glyceraldehyde 3-phosphate	Oxoglutaric acid	L-Glutamine
Dihydroxyacetone phosphate	Succinic acid	L-Isoleucine
Fumaric acid		L-Leucine
Glycerol 3-phosphate		L-Methionine
Glycine		L-Phenylalanine
L-Alanine		L-Proline
L-Asparagine		L-Serine
L-Glutamine		L-Threonine
L-Isoleucine		L-Tryptophan
L-Leucine		L-Tyrosine
L-Malic acid		L-Valine
L-Methionine		L-Arginine
L-Phenylalanine		L-Cysteine
L-Proline		L-Cystine
L-Serine		L-Glutamic acid
L-Threonine		L-Histidine
L-Tryptophan		L-Lysine
L-Tyrosine
L-Valine
N-Acetylglutamine
N-Acetylserine
Oxoglutaric acid
Phosphorylcholine
Saccharopine
Sarcosine
Ureidopropionic acid
Uridine 5'-diphosphate
Uridine diphosphate glucose
Uridine triphosphate
Argininosuccinic acid
Hypoxanthine
Xanthine
Fructose 6-phosphate
Glucose 6-phosphate
N-Acetylornithine
Pantothenic acid
Butyrylcarnitine
Uridine diphosphate-N-acetylglucosamine
Pipecolic acid
Ornithine
4,5-Dihydroorotic acid
Adenosine triphosphate

## Sheet: 93 AA biosyn genes
93 AA biosyn genes
YJL200C
YGR204W
YMR009W
YOL058W
YJL071W
YJL088W
YHR018C
YER069W
YMR062C
YOL140W
YDR127W
YGL148W
YDR035W
YBR249C
YPR060C
YPR145W
YGR124W
YHR208W
YJR148W
YOR303W
YJR109C
YCR054C
YAL012W
YGR155W
YEL009C
YDL171C
YER055C
YFR025C
YOR202W
YCL030C
YIL116W
YIL020C
YBR248C
YDR158W
YER052C
YJR139C
YLL058W
YER086W
YMR108W
YJR016C
YLR355C
YCL009C
YFR055W
YGL009C
YCL018W
YLR451W
YNL104C
YOR108W
YIR034C
YIL094C
YDR034C
YBR115C
YDL182W
YDL131W
YDR234W
YNR050C
YJR024C
YKR069W
YKL001C
YPR167C
YLR303W
YNL277W
YIR017C
YIL046W
YNL103W
YER091C
YLL062C
YBR084W
YPR118W
YOR130C
YNL316C
YDR300C
YOR323C
YER023W
YPL273W
YOR184W
YGR208W
YER081W
YIL074C
YJR130C
YGL184C
YHR025W
YCR053W
YDR007W
YER090W
YKL211C
YDR354W
YGL026C
YBR166C
YEL038W
YHR033W
YML082W
YML096W
