# Supplementary material for: Decapping activators Edc3 and Scd6 act redundantly with Dhh1 in post-transcriptional repression of starvation-induced pathways
Source: eLife. 2025 Nov 25;13:RP102287. doi: 10.7554/eLife.102287 (PMC12646578; doi:10.7554/eLife.102287)
Supplement: Figure 8—source data 1. — In Sheet 2 ‘raw intensity,’ the numbers indicate the signal intensities (areas under the peaks from mass spectrometry) of the metabolite listed in column A in the three biological replicates of the indicated mutant or wild-type (WT) strains. In the subsequent sheets, raw data from Sheet 2 is collated for the different labeled isoforms of the indicated metabolite in the upper eight rows, and the proportion of the metabolite comprised of each isoform is given in the lower rows for the different samples. The ‘_N’ labeling indicates the label addition in the metabolite, i.e., _1 indicates mass addition of 1 labeled carbon, _2 indicates mass addition of 2 labeled carbons. Please let me know if you have any doubts regarding this. [file elife-102287-fig8-data1.xlsx]

## Sheet: raw intensity
		WT			scd6edc3			dhh1			dcp2			pat1			pat1dhh1
		1	2	3	1	2	3	1	2	3	1	2	3	1	2	3	1	2	3
13CMal_1		1387000	1131000	991700	1587000	1508000	1633000	1530000	1866000	1428000	3842000	2014000	2918000	2872000	2384000	2835000	3217000	2620000	2221000
Pyruvate		84450000	86330000	98040000	80440000	75770000	80700000	85130000	87030000	73370000	84470000	53270000	60540000	75000000	59720000	59740000	90840000	83600000	75140000
Succinate		19560000	19330000	22140000	37180000	38770000	38110000	34270000	32980000	29270000	62690000	44380000	57470000	47880000	44730000	47770000	48570000	41610000	38840000
Malate		1738000	1651000	1726000	2545000	2297000	2545000	2185000	2361000	1918000	12100000	7905000	9233000	7172000	6205000	7164000	7628000	9424000	10250000
Oxaloacetate		3634000	2749000	2895000	4856000	4535000	5022000	5557000	5670000	4349000	7375000	4127000	3219000	5264000	3614000	3558000	12950000	10730000	9777000
alpha-KG		8921000	7347000	7231000	22690000	26300000	23170000	21830000	20170000	14060000	50700000	28180000	34230000	54500000	39320000	41700000	90810000	79870000	81400000
Cit_isocit		24640000	21140000	24470000	53500000	58830000	53510000	53740000	51570000	42470000	88300000	56350000	67630000	102300000	80210000	84850000	133800000	131500000	120900000
13COAA_2		390300	329800	335800	459300	431100	468500	489700	518300	363000	1810000	538300	642000	630600	489700	509300	1093000	857000	732000
13COAA_3		281500	264500	258900	176500	140700	163800	187300	198000	146200	555500	193100	219200	217800	165200	160200	294400	218100	187300
13COAA_4		76860	81030	85610	45090	36710	46470	33320	39870	34260	175800	51390	62790	44650	48290	31460	58600	36980	36480
13Ccit_2		1643000	1520000	1772000	3349000	3659000	3449000	3143000	3041000	2557000	5817000	3794000	4662000	5655000	4600000	4804000	7308000	6814000	6433000
13Ccit_4		585600	631900	729200	701200	742800	660500	568100	593600	529400	1778000	954900	1315000	820900	717700	699100	835200	648500	615900
13Ccit_5		277600	291900	353200	338600	385200	381800	284700	301200	265200	919300	537900	777300	480600	430400	471900	433300	354000	396800
13Ccit_6		114600	118900	131100	126900	150400	159000	134200	135900	111800	280300	168700	249000	180000	154700	141900	153500	124900	135600
13Cakg_1		1931000	1596000	1636000	4998000	5532000	4813000	4467000	4230000	2920000	11090000	6437000	7240000	11220000	8635000	8691000	20460000	17250000	16300000
13Cakg_3		205300	203400	202500	349700	399200	349100	287500	300700	204300	1393000	725200	919700	684600	604900	564200	1046000	771400	703400
13Cakg_4		80910	80230	86820	123900	145700	133000	105300	117600	87670	451200	255700	356600	220700	184500	182000	287900	212500	189800
13Csuc_2		1109000	1259000	1437000	2723000	2927000	3737000	2091000	2198000	1885000	4193000	2824000	3776000	2623000	2491000	2635000	2313000	1601000	1523000
13Csuc_4		214800	187400	239600	558800	638700	640100	564900	448600	556600	509400	464300	560500	643600	572900	611400	627300	541500	447100
Glyoxylate		2143000	2167000	2550000	1661000	1543000	1696000	1773000	1876000	1734000	1857000	1301000	1448000	1178000	1088000	1087000	1443000	1434000	1385000
13Cmal_2		225300	331000	354400	263800	273300	274100	267300	269500	289000	957400	500200	670900	483600	439100	588900	624900	449500	456200
13CMal_3		1395000	1382000	1560000	2819000	2590000	2877000	3138000	2975000	2779000	3098000	2270000	3105000	2856000	2579000	2930000	2044000	1676000	1965000
13Cglyoxylate_2		928700	795600	803100	864900	717800	791800	1043000	976600	782800	4243000	604600	866900	1481000	1086000	994200	2508000	1608000	1288000
13Cpyr_3		8249000	9558000	11170000	6846000	6320000	6834000	6382000	6369000	5062000	6799000	4032000	4793000	4989000	4436000	3938000	4644000	3499000	3238000
Pyr2		14370000	15710000	18460000	14190000	13630000	14590000	15380000	15950000	13320000	15630000	10560000	11410000	13840000	11180000	11410000	17490000	15760000	14290000
13Cpyr2_3		1158000	1479000	1732000	950400	826900	923200	780800	796200	675800	1007000	636200	709500	674000	628000	519000	612800	486200	458300
Suc2		18380000	18420000	23610000	38350000	41650000	42150000	35570000	35050000	31420000	67320000	48430000	63420000	50920000	48070000	53810000	50570000	43090000	40410000
13Csuc2_1		2504000	2551000	3121000	5136000	5710000	5597000	4876000	4746000	4249000	9005000	6580000	8477000	6825000	6455000	7112000	6744000	5666000	5531000
13Csuc2_2		1064000	1165000	1436000	2671000	2971000	3024000	2038000	2073000	1955000	3745000	2534000	3636000	2364000	2328000	2499000	2261000	1511000	1539000
13Csuc2_3		197400	200000	270000	348000	390900	394300	256700	278100	250100	516300	369200	520900	368300	335900	393200	264500	187700	175500
13Csuc2_4		115000	138000	151000	252600	282000	299700	151400	160800	157100	326800	230100	351300	190800	204100	210800	129300	104900	113000
Cit2		25260000	20860000	25070000	57580000	59740000	56910000	57510000	55200000	43160000	91710000	60070000	72990000	114300000	86140000	96430000	145800000	150100000	140000000
13Ccit2_1		6071000	5127000	6037000	13800000	14700000	13880000	14130000	13000000	10500000	22660000	14450000	17610000	27290000	21150000	22460000	34760000	35120000	33280000
13Ccit2_2		1537000	1391000	1612000	3159000	3401000	3228000	2952000	2927000	2423000	5489000	3586000	4524000	5533000	4431000	4728000	7384000	6870000	6269000
13Ccit2_3		1468000	1428000	1704000	1942000	1959000	1937000	1726000	1757000	1454000	5085000	2964000	4460000	2877000	2447000	2546000	2785000	2368000	2097000
13Ccit2_4		404900	434700	497800	558500	564600	559300	448800	467900	372400	1549000	842900	1191000	736300	660300	620600	721900	537600	480100
13Ccit2_5		234900	263500	314000	346400	340700	335900	303700	307500	234800	869900	503300	786100	490400	431500	428900	459200	350200	339900
13Ccit2_6		69020	71480	84470	84970	103000	95380	73750	74210	63300	257500	149000	196400	120900	105000	102700	124700	84980	83900
13COAA_1		956600	701900	740400	1102000	1010000	1165000	1247000	1282000	1009000	1690000	997500	793800	1147000	789700	796500	2944000	2383000	2145000
13CaKG_2		814500	722300	752700	1430000	1754000	1500000	1271000	1421000	972700	4770000	2585000	3441000	3384000	2522000	2677000	5246000	4112000	3629000
13Cpyr2_1		2036000	2265000	2606000	2007000	1867000	1966000	1678000	1776000	1471000	2289000	1120000	1429000	1556000	1330000	1253000	1924000	1461000	1255000
13Cpyr2_2		4360000	5388000	6381000	3156000	2971000	3174000	3132000	3307000	2706000	2661000	1681000	2262000	2609000	2101000	2035000	2305000	1519000	1344000
13CGlyox_1		279000	364100	419100	257800	249200	280500	265700	281900	284200	285200	274600	289900	197400	201800	223700	203400	214300	216400
13Cmal_4		431300	381300	401400	742800	713200	733400	803400	798300	733900	1118000	665200	782400	726400	725700	675700	476100	396200	394600

## Sheet: Citrate
		WT			edc3scd6			dhh1			dcp2			pat1			dhh1pat1
		1	2	3	1	2	3	1	2	3	1	2	3	1	2	3	1	2	3
Cit		25260000	20860000	25070000	57580000	59740000	56910000	57510000	55200000	43160000	91710000	60070000	72990000	114300000	86140000	96430000	145800000	150100000	140000000		25260000	25260000	25260000	25260000	25260000	25260000	25260000	25260000	25260000	25260000	25260000	25260000	25260000	25260000	25260000	25260000	25260000	25260000
13Ccit2_1		6071000	5127000	6037000	13800000	14700000	13880000	14130000	13000000	10500000	22660000	14450000	17610000	27290000	21150000	22460000	34760000	35120000	33280000		6071000	6071000	6071000	6071000	6071000	6071000	6071000	6071000	6071000	6071000	6071000	6071000	6071000	6071000	6071000	6071000	6071000	6071000
13Ccit2_2		1537000	1391000	1612000	3159000	3401000	3228000	2952000	2927000	2423000	5489000	3586000	4524000	5533000	4431000	4728000	7384000	6870000	6269000		1537000	1537000	1537000	1537000	1537000	1537000	1537000	1537000	1537000	1537000	1537000	1537000	1537000	1537000	1537000	1537000	1537000	1537000
13Ccit2_3		1468000	1428000	1704000	1942000	1959000	1937000	1726000	1757000	1454000	5085000	2964000	4460000	2877000	2447000	2546000	2785000	2368000	2097000		1468000	1468000	1468000	1468000	1468000	1468000	1468000	1468000	1468000	1468000	1468000	1468000	1468000	1468000	1468000	1468000	1468000	1468000
13Ccit2_4		404900	434700	497800	558500	564600	559300	448800	467900	372400	1549000	842900	1191000	736300	660300	620600	721900	537600	480100		404900	404900	404900	404900	404900	404900	404900	404900	404900	404900	404900	404900	404900	404900	404900	404900	404900	404900
13Ccit2_5		234900	263500	314000	346400	340700	335900	303700	307500	234800	869900	503300	786100	490400	431500	428900	459200	350200	339900		234900	234900	234900	234900	234900	234900	234900	234900	234900	234900	234900	234900	234900	234900	234900	234900	234900	234900
13Ccit2_6		69020	71480	84470	84970	103000	95380	73750	74210	63300	257500	149000	196400	120900	105000	102700	124700	84980	83900		69020	69020	69020	69020	69020	69020	69020	69020	69020	69020	69020	69020	69020	69020	69020	69020	69020	69020
Total		35044820	29575680	35319270	77470870	80808300	76945580	77144250	73733610	58207500	127620400	82565200	101757500	151347600	115364800	127316200	192034800	195430780	182549900		35044820	35044820	35044820	35044820	35044820	35044820	35044820	35044820	35044820	35044820	35044820	35044820	35044820	35044820	35044820	35044820	35044820	35044820
Relative amounts
Cit		1	0.825812	0.992478	2.27949	2.365	2.25297	2.27672	2.18527	1.70863	3.63064	2.37807	2.88955	4.52494	3.41013	3.8175	5.77197	5.9422	5.54236
13Ccit2_1		1	0.844507	0.9944	2.2731	2.42135	2.28628	2.32746	2.14133	1.72953	3.7325	2.38017	2.90068	4.49514	3.48378	3.69956	5.72558	5.78488	5.4818
13Ccit2_2		1	0.90501	1.0488	2.0553	2.21275	2.1002	1.92062	1.90436	1.57645	3.57124	2.33312	2.9434	3.59987	2.88289	3.07612	4.80416	4.46975	4.07872
13Ccit2_3		1	0.972752	1.16076	1.32289	1.33447	1.31948	1.17575	1.19687	0.990463	3.4639	2.01907	3.03815	1.95981	1.66689	1.73433	1.89714	1.61308	1.42847
13Ccit2_4		1	1.0736	1.22944	1.37935	1.39442	1.38133	1.10842	1.15559	0.919733	3.82564	2.08175	2.94147	1.81847	1.63077	1.53272	1.78291	1.32774	1.18572
13Ccit2_5		1	1.12175	1.33674	1.47467	1.4504	1.42997	1.29289	1.30907	0.999574	3.70328	2.14261	3.34653	2.0877	1.83695	1.82588	1.95487	1.49085	1.447
13Ccit2_6		1	1.03564	1.22385	1.23109	1.49232	1.38192	1.06853	1.0752	0.917125	3.7308	2.15879	2.84555	1.75167	1.5213	1.48797	1.80672	1.23124	1.21559
Total		1	0.843939	1.00783	2.21062	2.30586	2.19563	2.2013	2.10398	1.66094	3.64163	2.35599	2.90364	4.31869	3.29192	3.63295	5.47969	5.5766	5.20904
Percentage label incorporation
Cit		25260000	20860000	25070000	57580000	59740000	56910000	57510000	55200000	43160000	91710000	60070000	72990000	114300000	86140000	96430000	145800000	150100000	140000000		35044820	29575680	35319270	77470870	80808300	76945580	77144250	73733610	58207500	127620400	82565200	101757500	151347600	115364800	127316200	192034800	195430780	182549900
13Ccit2_1		6071000	5127000	6037000	13800000	14700000	13880000	14130000	13000000	10500000	22660000	14450000	17610000	27290000	21150000	22460000	34760000	35120000	33280000		35044820	29575680	35319270	77470870	80808300	76945580	77144250	73733610	58207500	127620400	82565200	101757500	151347600	115364800	127316200	192034800	195430780	182549900
13Ccit2_2		1537000	1391000	1612000	3159000	3401000	3228000	2952000	2927000	2423000	5489000	3586000	4524000	5533000	4431000	4728000	7384000	6870000	6269000		35044820	29575680	35319270	77470870	80808300	76945580	77144250	73733610	58207500	127620400	82565200	101757500	151347600	115364800	127316200	192034800	195430780	182549900
13Ccit2_3		1468000	1428000	1704000	1942000	1959000	1937000	1726000	1757000	1454000	5085000	2964000	4460000	2877000	2447000	2546000	2785000	2368000	2097000		35044820	29575680	35319270	77470870	80808300	76945580	77144250	73733610	58207500	127620400	82565200	101757500	151347600	115364800	127316200	192034800	195430780	182549900
13Ccit2_4		404900	434700	497800	558500	564600	559300	448800	467900	372400	1549000	842900	1191000	736300	660300	620600	721900	537600	480100		35044820	29575680	35319270	77470870	80808300	76945580	77144250	73733610	58207500	127620400	82565200	101757500	151347600	115364800	127316200	192034800	195430780	182549900
13Ccit2_5		234900	263500	314000	346400	340700	335900	303700	307500	234800	869900	503300	786100	490400	431500	428900	459200	350200	339900		35044820	29575680	35319270	77470870	80808300	76945580	77144250	73733610	58207500	127620400	82565200	101757500	151347600	115364800	127316200	192034800	195430780	182549900
13Ccit2_6		69020	71480	84470	84970	103000	95380	73750	74210	63300	257500	149000	196400	120900	105000	102700	124700	84980	83900		35044820	29575680	35319270	77470870	80808300	76945580	77144250	73733610	58207500	127620400	82565200	101757500	151347600	115364800	127316200	192034800	195430780	182549900
		35044820	29575680	35319270	77470870	80808300	76945580	77144250	73733610	58207500	127620400	82565200	101757500	151347600	115364800	127316200	192034800	195430780	182549900
Cit		72.0791	70.5309	70.9811	74.3247	73.928	73.9614	74.5487	74.8641	74.1485	71.8616	72.7546	71.7294	75.5215	74.6675	75.7406	75.9237	76.8047	76.6914
13Ccit2_1		17.3235	17.3352	17.0927	17.8131	18.1912	18.0387	18.3163	17.631	18.0389	17.7558	17.5013	17.3058	18.0313	18.3331	17.6411	18.1009	17.9706	18.2306
13Ccit2_2		4.38581	4.70319	4.56408	4.07766	4.20873	4.19517	3.8266	3.9697	4.16269	4.30104	4.34323	4.44586	3.65582	3.84086	3.71359	3.84514	3.51531	3.43413
13Ccit2_3		4.18892	4.82829	4.82456	2.50675	2.42426	2.51736	2.23737	2.3829	2.49796	3.98447	3.58989	4.38297	1.90092	2.1211	1.99975	1.45026	1.21168	1.14873
13Ccit2_4		1.15538	1.46979	1.40943	0.720916	0.698691	0.726877	0.581767	0.634582	0.63978	1.21376	1.02089	1.17043	0.486496	0.572358	0.487448	0.375921	0.275085	0.262997
13Ccit2_5		0.670285	0.890935	0.889033	0.447136	0.421615	0.436542	0.393678	0.417042	0.403384	0.681631	0.609579	0.772523	0.324022	0.374031	0.336878	0.239123	0.179194	0.186196
13Ccit2_6		0.196948	0.241685	0.239161	0.10968	0.127462	0.123958	0.0956001	0.100646	0.108749	0.20177	0.180463	0.193008	0.0798823	0.0910156	0.0806653	0.0649361	0.0434834	0.04596
		WT			scd6edc3			dhh1			dcp2			pat1			pat1dhh1
		1	2	3	1	2	3	1	2	3	1	2	3	1	2	3	1	2	3
Cit		25260000	20860000	25070000	57580000	59740000	56910000	57510000	55200000	43160000	91710000	60070000	72990000	114300000	86140000	96430000	145800000	150100000	140000000
13Ccit2_1		6071000	5127000	6037000	13800000	14700000	13880000	14130000	13000000	10500000	22660000	14450000	17610000	27290000	21150000	22460000	34760000	35120000	33280000
13Ccit2_2		1537000	1391000	1612000	3159000	3401000	3228000	2952000	2927000	2423000	5489000	3586000	4524000	5533000	4431000	4728000	7384000	6870000	6269000
13Ccit2_3		1468000	1428000	1704000	1942000	1959000	1937000	1726000	1757000	1454000	5085000	2964000	4460000	2877000	2447000	2546000	2785000	2368000	2097000
13Ccit2_4		404900	434700	497800	558500	564600	559300	448800	467900	372400	1549000	842900	1191000	736300	660300	620600	721900	537600	480100
13Ccit2_5		234900	263500	314000	346400	340700	335900	303700	307500	234800	869900	503300	786100	490400	431500	428900	459200	350200	339900
13Ccit2_6		69020	71480	84470	84970	103000	95380	73750	74210	63300	257500	149000	196400	120900	105000	102700	124700	84980	83900
Total		35044820	29575680	35319270	77470870	80808300	76945580	77144250	73733610	58207500	127620400	82565200	101757500	151347600	115364800	127316200	192034800	195430780	182549900
		WT			scd6edc3			dhh1			dcp2			pat1			pat1dhh1
		1	2	3	1	2	3	1	2	3	1	2	3	1	2	3	1	2	3
Cit		0.720791	0.595238	0.71537	1.64304	1.70467	1.62392	1.64104	1.57513	1.23157	2.61693	1.71409	2.08276	3.26154	2.458	2.75162	4.16039	4.28309	3.99488
13Ccit2_1		0.173235	0.146298	0.172265	0.393781	0.419463	0.396064	0.403198	0.370954	0.299616	0.646601	0.412329	0.502499	0.778717	0.603513	0.640894	0.991873	1.00215	0.949641
13Ccit2_2		0.0438581	0.039692	0.0459982	0.0901417	0.0970472	0.0921106	0.084235	0.0835216	0.06914	0.156628	0.102326	0.129092	0.157884	0.126438	0.134913	0.210702	0.196035	0.178885
13Ccit2_3		0.0418892	0.0407478	0.0486234	0.0554148	0.0558998	0.0552721	0.0492512	0.0501358	0.0414897	0.1451	0.0845774	0.127266	0.0820949	0.0698249	0.0726498	0.0794697	0.0675706	0.0598377
13Ccit2_4		0.0115538	0.0124041	0.0142047	0.0159367	0.0161108	0.0159596	0.0128065	0.0133515	0.0106264	0.0442005	0.0240521	0.0339851	0.0210102	0.0188416	0.0177088	0.0205993	0.0153404	0.0136996
13Ccit2_5		0.00670285	0.00751894	0.00895995	0.00988449	0.00972184	0.00958487	0.00866605	0.00877448	0.00669999	0.0248225	0.0143616	0.0224313	0.0139935	0.0123128	0.0122386	0.0131032	0.00999292	0.00969901
13Ccit2_6		0.00196948	0.00203967	0.00241034	0.00242461	0.00293909	0.00272166	0.00210445	0.00211757	0.00180626	0.00734773	0.0042517	0.00560425	0.00344987	0.00299616	0.00293053	0.0035583	0.00242489	0.00239408

## Sheet: 2KG
		WT			scd6edc3			dhh1			dcp2			pat1			pat1dhh1
		1	2	3	1	2	3	1	2	3	1	2	3	1	2	3	1	2	3
alpha-KG		8921000	7347000	7231000	22690000	26300000	23170000	21830000	20170000	14060000	50700000	28180000	34230000	54500000	39320000	41700000	90810000	79870000	81400000		8921000	8921000	8921000	8921000	8921000	8921000	8921000	8921000	8921000	8921000	8921000	8921000	8921000	8921000	8921000	8921000	8921000	8921000
13Cakg_1		1931000	1596000	1636000	4998000	5532000	4813000	4467000	4230000	2920000	11090000	6437000	7240000	11220000	8635000	8691000	20460000	17250000	16300000		1931000	1931000	1931000	1931000	1931000	1931000	1931000	1931000	1931000	1931000	1931000	1931000	1931000	1931000	1931000	1931000	1931000	1931000
13CaKG_2		814500	722300	752700	1430000	1754000	1500000	1271000	1421000	972700	4770000	2585000	3441000	3384000	2522000	2677000	5246000	4112000	3629000		814500	814500	814500	814500	814500	814500	814500	814500	814500	814500	814500	814500	814500	814500	814500	814500	814500	814500
13Cakg_3		205300	203400	202500	349700	399200	349100	287500	300700	204300	1393000	725200	919700	684600	604900	564200	1046000	771400	703400		205300	205300	205300	205300	205300	205300	205300	205300	205300	205300	205300	205300	205300	205300	205300	205300	205300	205300
13Cakg_4		80910	80230	86820	123900	145700	133000	105300	117600	87670	451200	255700	356600	220700	184500	182000	287900	212500	189800		80910	80910	80910	80910	80910	80910	80910	80910	80910	80910	80910	80910	80910	80910	80910	80910	80910	80910
Total		11952710	9948930	9909020	29591600	34130900	29965100	27960800	26239300	18244670	68404200	38182900	46187300	70009300	51266400	53814200	117849900	102215900	102222200		11952710	11952710	11952710	11952710	11952710	11952710	11952710	11952710	11952710	11952710	11952710	11952710	11952710	11952710	11952710	11952710	11952710	11952710
Relative amounts
alpha-KG		1	0.823562	0.810559	2.54344	2.9481	2.59724	2.44704	2.26096	1.57606	5.68322	3.15884	3.83701	6.10918	4.40758	4.67436	10.1794	8.95303	9.12454
13Cakg_1		1	0.826515	0.847229	2.5883	2.86484	2.49249	2.31331	2.19057	1.51217	5.74314	3.33351	3.74935	5.81046	4.47178	4.50078	10.5955	8.9332	8.44122
13CaKG_2		1	0.886802	0.924125	1.75568	2.15347	1.84162	1.56047	1.74463	1.19423	5.85635	3.17373	4.22468	4.1547	3.09638	3.28668	6.44076	5.0485	4.45549
13Cakg_3		1	0.990745	0.986361	1.70336	1.94447	1.70044	1.40039	1.46469	0.995129	6.78519	3.53239	4.47979	3.33463	2.94642	2.74817	5.09498	3.75743	3.42621
13Cakg_4		1	0.991596	1.07304	1.53133	1.80077	1.6438	1.30145	1.45347	1.08355	5.57657	3.1603	4.40737	2.72772	2.28031	2.24941	3.55827	2.62637	2.34582
Total		1	0.832358	0.829019	2.47572	2.85549	2.50697	2.33929	2.19526	1.5264	5.7229	3.1945	3.86417	5.85719	4.2891	4.50226	9.85968	8.55169	8.55222
Percentage label incorporation
alpha-KG		8921000	7347000	7231000	22690000	26300000	23170000	21830000	20170000	14060000	50700000	28180000	34230000	54500000	39320000	41700000	90810000	79870000	81400000		11952710	9948930	9909020	29591600	34130900	29965100	27960800	26239300	18244670	68404200	38182900	46187300	70009300	51266400	53814200	117849900	102215900	102222200
13Cakg_1		1931000	1596000	1636000	4998000	5532000	4813000	4467000	4230000	2920000	11090000	6437000	7240000	11220000	8635000	8691000	20460000	17250000	16300000		11952710	9948930	9909020	29591600	34130900	29965100	27960800	26239300	18244670	68404200	38182900	46187300	70009300	51266400	53814200	117849900	102215900	102222200
13CaKG_2		814500	722300	752700	1430000	1754000	1500000	1271000	1421000	972700	4770000	2585000	3441000	3384000	2522000	2677000	5246000	4112000	3629000		11952710	9948930	9909020	29591600	34130900	29965100	27960800	26239300	18244670	68404200	38182900	46187300	70009300	51266400	53814200	117849900	102215900	102222200
13Cakg_3		205300	203400	202500	349700	399200	349100	287500	300700	204300	1393000	725200	919700	684600	604900	564200	1046000	771400	703400		11952710	9948930	9909020	29591600	34130900	29965100	27960800	26239300	18244670	68404200	38182900	46187300	70009300	51266400	53814200	117849900	102215900	102222200
13Cakg_4		80910	80230	86820	123900	145700	133000	105300	117600	87670	451200	255700	356600	220700	184500	182000	287900	212500	189800		11952710	9948930	9909020	29591600	34130900	29965100	27960800	26239300	18244670	68404200	38182900	46187300	70009300	51266400	53814200	117849900	102215900	102222200
		11952710	9948930	9909020	29591600	34130900	29965100	27960800	26239300	18244670	68404200	38182900	46187300	70009300	51266400	53814200	117849900	102215900	102222200
alpha-KG		74.6358	73.8471	72.9739	76.6772	77.0563	77.3233	78.0736	76.8694	77.0636	74.1183	73.8027	74.1113	77.8468	76.6974	77.4888	77.0556	78.1385	79.6305
13Cakg_1		16.1553	16.0419	16.5102	16.8899	16.2082	16.062	15.9759	16.1209	16.0047	16.2125	16.8583	15.6753	16.0264	16.8434	16.15	17.3611	16.876	15.9457
13CaKG_2		6.81435	7.26008	7.59611	4.83245	5.13904	5.00582	4.54565	5.41554	5.33142	6.97326	6.77005	7.4501	4.83364	4.9194	4.97452	4.45143	4.02286	3.55011
13Cakg_3		1.7176	2.04444	2.04359	1.18175	1.16961	1.16502	1.02823	1.14599	1.11978	2.03642	1.89928	1.99124	0.97787	1.17992	1.04842	0.88757	0.754677	0.688109
13Cakg_4		0.676918	0.806418	0.876171	0.4187	0.426886	0.44385	0.376599	0.448183	0.480524	0.659609	0.669672	0.772074	0.315244	0.359885	0.338201	0.244294	0.207893	0.185674
		WT			scd6edc3			dhh1			dcp2			pat1			pat1dhh1
		1	2	3	1	2	3	1	2	3	1	2	3	1	2	3	1	2	3
alpha-KG		8921000	7347000	7231000	22690000	26300000	23170000	21830000	20170000	14060000	50700000	28180000	34230000	54500000	39320000	41700000	90810000	79870000	81400000
13Cakg_1		1931000	1596000	1636000	4998000	5532000	4813000	4467000	4230000	2920000	11090000	6437000	7240000	11220000	8635000	8691000	20460000	17250000	16300000
13CaKG_2		814500	722300	752700	1430000	1754000	1500000	1271000	1421000	972700	4770000	2585000	3441000	3384000	2522000	2677000	5246000	4112000	3629000
13Cakg_3		205300	203400	202500	349700	399200	349100	287500	300700	204300	1393000	725200	919700	684600	604900	564200	1046000	771400	703400
13Cakg_4		80910	80230	86820	123900	145700	133000	105300	117600	87670	451200	255700	356600	220700	184500	182000	287900	212500	189800
Total		11952710	9948930	9909020	29591600	34130900	29965100	27960800	26239300	18244670	68404200	38182900	46187300	70009300	51266400	53814200	117849900	102215900	102222200
alpha-KG		0.746358	0.614672	0.604967	1.89831	2.20034	1.93847	1.82636	1.68748	1.1763	4.24172	2.35762	2.86379	4.55964	3.28963	3.48875	7.59744	6.68217	6.81017
13Cakg_1		0.161553	0.133526	0.136873	0.418148	0.462824	0.40267	0.373723	0.353895	0.244296	0.927823	0.538539	0.60572	0.938699	0.72243	0.727115	1.71175	1.44319	1.36371
13CaKG_2		0.0681435	0.0604298	0.0629732	0.119638	0.146745	0.125495	0.106336	0.118885	0.081379	0.399073	0.216269	0.287885	0.283116	0.210998	0.223966	0.438896	0.344022	0.303613
13Cakg_3		0.017176	0.0170171	0.0169418	0.029257	0.0333983	0.0292068	0.0240531	0.0251575	0.0170924	0.116543	0.0606724	0.0769449	0.0572757	0.0506078	0.0472027	0.0875115	0.0645377	0.0588486
13Cakg_4		0.00676918	0.00671229	0.00726362	0.0103659	0.0121897	0.0111272	0.00880972	0.00983877	0.00733474	0.0377488	0.0213926	0.0298342	0.0184644	0.0154358	0.0152267	0.0240866	0.0177784	0.0158792

## Sheet: OAA
		WT			scd6edc3			dhh1			dcp2			pat1			pat1dhh1
		1	2	3	1	2	3	1	2	3	1	2	3	1	2	3	1	2	3
Oxaloacetate		3634000	2749000	2895000	4856000	4535000	5022000	5557000	5670000	4349000	7375000	4127000	3219000	5264000	3614000	3558000	12950000	10730000	9777000		3634000	3634000	3634000	3634000	3634000	3634000	3634000	3634000	3634000	3634000	3634000	3634000	3634000	3634000	3634000	3634000	3634000	3634000
13COAA_1		956600	701900	740400	1102000	1010000	1165000	1247000	1282000	1009000	1690000	997500	793800	1147000	789700	796500	2944000	2383000	2145000		956600	956600	956600	956600	956600	956600	956600	956600	956600	956600	956600	956600	956600	956600	956600	956600	956600	956600
13COAA_2		390300	329800	335800	459300	431100	468500	489700	518300	363000	1810000	538300	642000	630600	489700	509300	1093000	857000	732000		390300	390300	390300	390300	390300	390300	390300	390300	390300	390300	390300	390300	390300	390300	390300	390300	390300	390300
13COAA_3		281500	264500	258900	176500	140700	163800	187300	198000	146200	555500	193100	219200	217800	165200	160200	294400	218100	187300		281500	281500	281500	281500	281500	281500	281500	281500	281500	281500	281500	281500	281500	281500	281500	281500	281500	281500
13COAA_4		76860	81030	85610	45090	36710	46470	33320	39870	34260	175800	51390	62790	44650	48290	31460	58600	36980	36480		76860	76860	76860	76860	76860	76860	76860	76860	76860	76860	76860	76860	76860	76860	76860	76860	76860	76860
Total		5339260	4126230	4315710	6638890	6153510	6865770	7514320	7708170	5901460	11606300	5907290	4936790	7304050	5106890	5055460	17340000	14225080	12877780		5339260	5339260	5339260	5339260	5339260	5339260	5339260	5339260	5339260	5339260	5339260	5339260	5339260	5339260	5339260	5339260	5339260	5339260
Relative amounts
Oxaloacetate		1	0.756467	0.796643	1.33627	1.24794	1.38195	1.52917	1.56026	1.19675	2.02944	1.13566	0.885801	1.44854	0.994496	0.979086	3.56357	2.95267	2.69042
13COAA_1		1	0.733745	0.773991	1.152	1.05582	1.21785	1.30358	1.34016	1.05478	1.76667	1.04276	0.829814	1.19904	0.825528	0.832636	3.07757	2.49111	2.24232
13COAA_2		1	0.844991	0.860364	1.17679	1.10453	1.20036	1.25468	1.32795	0.930054	4.63746	1.3792	1.64489	1.61568	1.25468	1.30489	2.80041	2.19575	1.87548
13COAA_3		1	0.939609	0.919716	0.626998	0.499822	0.581883	0.665364	0.703375	0.519361	1.97336	0.685968	0.778686	0.773712	0.586856	0.569094	1.04583	0.774778	0.665364
13COAA_4		1	1.05425	1.11384	0.586651	0.477622	0.604606	0.433515	0.518735	0.445746	2.28728	0.668618	0.81694	0.580926	0.628285	0.409316	0.762425	0.481135	0.474629
Total		1	0.772809	0.808297	1.24341	1.1525	1.2859	1.40737	1.44368	1.1053	2.17377	1.10639	0.924621	1.36799	0.956479	0.946847	3.24764	2.66424	2.4119
Percentage label incorporation
Oxaloacetate		3634000	2749000	2895000	4856000	4535000	5022000	5557000	5670000	4349000	7375000	4127000	3219000	5264000	3614000	3558000	12950000	10730000	9777000		5339260	4126230	4315710	6638890	6153510	6865770	7514320	7708170	5901460	11606300	5907290	4936790	7304050	5106890	5055460	17340000	14225080	12877780
13COAA_1		956600	701900	740400	1102000	1010000	1165000	1247000	1282000	1009000	1690000	997500	793800	1147000	789700	796500	2944000	2383000	2145000		5339260	4126230	4315710	6638890	6153510	6865770	7514320	7708170	5901460	11606300	5907290	4936790	7304050	5106890	5055460	17340000	14225080	12877780
13COAA_2		390300	329800	335800	459300	431100	468500	489700	518300	363000	1810000	538300	642000	630600	489700	509300	1093000	857000	732000		5339260	4126230	4315710	6638890	6153510	6865770	7514320	7708170	5901460	11606300	5907290	4936790	7304050	5106890	5055460	17340000	14225080	12877780
13COAA_3		281500	264500	258900	176500	140700	163800	187300	198000	146200	555500	193100	219200	217800	165200	160200	294400	218100	187300		5339260	4126230	4315710	6638890	6153510	6865770	7514320	7708170	5901460	11606300	5907290	4936790	7304050	5106890	5055460	17340000	14225080	12877780
13COAA_4		76860	81030	85610	45090	36710	46470	33320	39870	34260	175800	51390	62790	44650	48290	31460	58600	36980	36480		5339260	4126230	4315710	6638890	6153510	6865770	7514320	7708170	5901460	11606300	5907290	4936790	7304050	5106890	5055460	17340000	14225080	12877780
		5339260	4126230	4315710	6638890	6153510	6865770	7514320	7708170	5901460	11606300	5907290	4936790	7304050	5106890	5055460	17340000	14225080	12877780
Oxaloacetate		68.0619	66.6226	67.0805	73.1448	73.6978	73.1455	73.9521	73.5583	73.6936	63.5431	69.8628	65.2043	72.0696	70.7671	70.3794	74.6828	75.4302	75.9215
13COAA_1		17.9163	17.0107	17.1559	16.5992	16.4134	16.9682	16.595	16.6317	17.0975	14.5611	16.8859	16.0793	15.7036	15.4634	15.7552	16.9781	16.7521	16.6566
13COAA_2		7.31	7.99277	7.78087	6.91833	7.00576	6.82371	6.51689	6.72403	6.15102	15.595	9.11247	13.0044	8.63357	9.58901	10.0743	6.30334	6.02457	5.68421
13COAA_3		5.27227	6.41021	5.99901	2.65858	2.2865	2.38575	2.49257	2.5687	2.47735	4.78619	3.26884	4.44013	2.98191	3.23485	3.16885	1.69781	1.53321	1.45444
13COAA_4		1.43953	1.96378	1.98368	0.67918	0.59657	0.676836	0.44342	0.517243	0.580534	1.51469	0.869942	1.27188	0.611305	0.945585	0.622297	0.337947	0.259963	0.283279
		WT			scd6edc3			dhh1			dcp2			pat1			pat1dhh1
		1	2	3	1	2	3	1	2	3	1	2	3	1	2	3	1	2	3
Oxaloacetate		3634000	2749000	2895000	4856000	4535000	5022000	5557000	5670000	4349000	7375000	4127000	3219000	5264000	3614000	3558000	12950000	10730000	9777000
13COAA_1		956600	701900	740400	1102000	1010000	1165000	1247000	1282000	1009000	1690000	997500	793800	1147000	789700	796500	2944000	2383000	2145000
13COAA_2		390300	329800	335800	459300	431100	468500	489700	518300	363000	1810000	538300	642000	630600	489700	509300	1093000	857000	732000
13COAA_3		281500	264500	258900	176500	140700	163800	187300	198000	146200	555500	193100	219200	217800	165200	160200	294400	218100	187300
13COAA_4		76860	81030	85610	45090	36710	46470	33320	39870	34260	175800	51390	62790	44650	48290	31460	58600	36980	36480
Total		5339260	4126230	4315710	6638890	6153510	6865770	7514320	7708170	5901460	11606300	5907290	4936790	7304050	5106890	5055460	17340000	14225080	12877780
Oxaloacetate		0.680619	0.514865	0.54221	0.909489	0.849369	0.94058	1.04078	1.06194	0.814532	1.38128	0.772954	0.602893	0.985904	0.676873	0.666384	2.42543	2.00964	1.83115
13COAA_1		0.179163	0.13146	0.138671	0.206396	0.189165	0.218195	0.233553	0.240108	0.188977	0.316523	0.186824	0.148672	0.214824	0.147904	0.149178	0.551387	0.446317	0.401741
13COAA_2		0.0731	0.0617689	0.0628926	0.0860232	0.0807415	0.0877462	0.0917168	0.0970734	0.0679869	0.338998	0.100819	0.120241	0.118106	0.0917168	0.0953878	0.20471	0.160509	0.137098
13COAA_3		0.0527227	0.0495387	0.0484899	0.033057	0.026352	0.0306784	0.0350798	0.0370838	0.0273821	0.104041	0.0361661	0.0410544	0.0407922	0.0309406	0.0300042	0.0551387	0.0408484	0.0350798
13COAA_4		0.0143953	0.0151763	0.0160341	0.00844499	0.00687548	0.00870345	0.00624057	0.00746733	0.00641662	0.0329259	0.00962493	0.0117601	0.00836258	0.00904432	0.0058922	0.0109753	0.00692605	0.00683241

## Sheet: Succinate
		WT			scd6edc3			dhh1			dcp2			pat1			pat1dhh1
		1	2	3	1	2	3	1	2	3	1	2	3	1	2	3	1	2	3
Suc		18380000	18420000	23610000	38350000	41650000	42150000	35570000	35050000	31420000	67320000	48430000	63420000	50920000	48070000	53810000	50570000	43090000	40410000		18380000	18380000	18380000	18380000	18380000	18380000	18380000	18380000	18380000	18380000	18380000	18380000	18380000	18380000	18380000	18380000	18380000	18380000
13Csuc2_1		2504000	2551000	3121000	5136000	5710000	5597000	4876000	4746000	4249000	9005000	6580000	8477000	6825000	6455000	7112000	6744000	5666000	5531000		2504000	2504000	2504000	2504000	2504000	2504000	2504000	2504000	2504000	2504000	2504000	2504000	2504000	2504000	2504000	2504000	2504000	2504000
13Csuc2_2		1064000	1165000	1436000	2671000	2971000	3024000	2038000	2073000	1955000	3745000	2534000	3636000	2364000	2328000	2499000	2261000	1511000	1539000		1064000	1064000	1064000	1064000	1064000	1064000	1064000	1064000	1064000	1064000	1064000	1064000	1064000	1064000	1064000	1064000	1064000	1064000
13Csuc2_3		197400	200000	270000	348000	390900	394300	256700	278100	250100	516300	369200	520900	368300	335900	393200	264500	187700	175500		197400	197400	197400	197400	197400	197400	197400	197400	197400	197400	197400	197400	197400	197400	197400	197400	197400	197400
13Csuc2_4		115000	138000	151000	252600	282000	299700	151400	160800	157100	326800	230100	351300	190800	204100	210800	129300	104900	113000		115000	115000	115000	115000	115000	115000	115000	115000	115000	115000	115000	115000	115000	115000	115000	115000	115000	115000
Total		22260400	22474000	28588000	46757600	51003900	51465000	42892100	42307900	38031200	80913100	58143300	76405200	60668100	57393000	64025000	59968800	50559600	47768500		22260400	22260400	22260400	22260400	22260400	22260400	22260400	22260400	22260400	22260400	22260400	22260400	22260400	22260400	22260400	22260400	22260400	22260400
Relative amounts
Suc		1	1.00218	1.28455	2.08651	2.26605	2.29325	1.93526	1.90696	1.70947	3.66268	2.63493	3.45049	2.7704	2.61534	2.92764	2.75136	2.3444	2.19859
13Csuc2_1		1	1.01877	1.24641	2.05112	2.28035	2.23522	1.94728	1.89537	1.69688	3.59625	2.6278	3.38538	2.72564	2.57788	2.84026	2.69329	2.26278	2.20887
13Csuc2_2		1	1.09492	1.34962	2.51034	2.79229	2.84211	1.91541	1.94831	1.83741	3.51974	2.38158	3.41729	2.2218	2.18797	2.34868	2.125	1.42011	1.44643
13Csuc2_3		1	1.01317	1.36778	1.76292	1.98024	1.99747	1.30041	1.40881	1.26697	2.6155	1.87031	2.6388	1.86575	1.70162	1.99189	1.33992	0.950861	0.889058
13Csuc2_4		1	1.2	1.31304	2.19652	2.45217	2.60609	1.31652	1.39826	1.36609	2.84174	2.00087	3.05478	1.65913	1.77478	1.83304	1.12435	0.912174	0.982609
Total		1	1.0096	1.28425	2.10048	2.29124	2.31195	1.92683	1.90059	1.70847	3.63484	2.61196	3.43234	2.72538	2.57826	2.87618	2.69397	2.27128	2.1459
Percentage label incorporation
Suc		18380000	18420000	23610000	38350000	41650000	42150000	35570000	35050000	31420000	67320000	48430000	63420000	50920000	48070000	53810000	50570000	43090000	40410000		22260400	22474000	28588000	46757600	51003900	51465000	42892100	42307900	38031200	80913100	58143300	76405200	60668100	57393000	64025000	59968800	50559600	47768500
13Csuc2_1		2504000	2551000	3121000	5136000	5710000	5597000	4876000	4746000	4249000	9005000	6580000	8477000	6825000	6455000	7112000	6744000	5666000	5531000		22260400	22474000	28588000	46757600	51003900	51465000	42892100	42307900	38031200	80913100	58143300	76405200	60668100	57393000	64025000	59968800	50559600	47768500
13Csuc2_2		1064000	1165000	1436000	2671000	2971000	3024000	2038000	2073000	1955000	3745000	2534000	3636000	2364000	2328000	2499000	2261000	1511000	1539000		22260400	22474000	28588000	46757600	51003900	51465000	42892100	42307900	38031200	80913100	58143300	76405200	60668100	57393000	64025000	59968800	50559600	47768500
13Csuc2_3		197400	200000	270000	348000	390900	394300	256700	278100	250100	516300	369200	520900	368300	335900	393200	264500	187700	175500		22260400	22474000	28588000	46757600	51003900	51465000	42892100	42307900	38031200	80913100	58143300	76405200	60668100	57393000	64025000	59968800	50559600	47768500
13Csuc2_4		115000	138000	151000	252600	282000	299700	151400	160800	157100	326800	230100	351300	190800	204100	210800	129300	104900	113000		22260400	22474000	28588000	46757600	51003900	51465000	42892100	42307900	38031200	80913100	58143300	76405200	60668100	57393000	64025000	59968800	50559600	47768500
		22260400	22474000	28588000	46757600	51003900	51465000	42892100	42307900	38031200	80913100	58143300	76405200	60668100	57393000	64025000	59968800	50559600	47768500
Suc		82.5681	81.9614	82.5871	82.0188	81.6604	81.9003	82.929	82.845	82.6164	83.2004	83.2942	83.0048	83.9321	83.7559	84.0453	84.3272	85.2261	84.5955
13Csuc2_1		11.2487	11.3509	10.9172	10.9843	11.1952	10.8754	11.3681	11.2178	11.1724	11.1292	11.3169	11.0948	11.2497	11.247	11.1082	11.2458	11.2066	11.5788
13Csuc2_2		4.77979	5.18377	5.02309	5.71244	5.82504	5.87584	4.75146	4.89979	5.14052	4.62842	4.3582	4.75884	3.89661	4.05624	3.90316	3.77029	2.98855	3.22179
13Csuc2_3		0.886777	0.889917	0.944452	0.744264	0.766412	0.766152	0.598479	0.657324	0.657618	0.638092	0.634983	0.68176	0.607074	0.585263	0.614135	0.441063	0.371245	0.367397
13Csuc2_4		0.516612	0.614043	0.528194	0.540233	0.552899	0.582338	0.352979	0.380071	0.413082	0.40389	0.395746	0.459785	0.314498	0.355618	0.329246	0.215612	0.207478	0.236558
		WT			scd6edc3			dhh1			dcp2			pat1			pat1dhh1
		1	2	3	1	2	3	1	2	3	1	2	3	1	2	3	1	2	3
Suc		18380000	18420000	23610000	38350000	41650000	42150000	35570000	35050000	31420000	67320000	48430000	63420000	50920000	48070000	53810000	50570000	43090000	40410000
13Csuc2_1		2504000	2551000	3121000	5136000	5710000	5597000	4876000	4746000	4249000	9005000	6580000	8477000	6825000	6455000	7112000	6744000	5666000	5531000
13Csuc2_2		1064000	1165000	1436000	2671000	2971000	3024000	2038000	2073000	1955000	3745000	2534000	3636000	2364000	2328000	2499000	2261000	1511000	1539000
13Csuc2_3		197400	200000	270000	348000	390900	394300	256700	278100	250100	516300	369200	520900	368300	335900	393200	264500	187700	175500
13Csuc2_4		115000	138000	151000	252600	282000	299700	151400	160800	157100	326800	230100	351300	190800	204100	210800	129300	104900	113000
Total		22260400	22474000	28588000	46757600	51003900	51465000	42892100	42307900	38031200	80913100	58143300	76405200	60668100	57393000	64025000	59968800	50559600	47768500
Suc		0.825681	0.827478	1.06063	1.72279	1.87104	1.8935	1.5979	1.57454	1.41148	3.0242	2.17561	2.84901	2.28747	2.15944	2.4173	2.27175	1.93572	1.81533
13Csuc2_1		0.112487	0.114598	0.140204	0.230724	0.256509	0.251433	0.219044	0.213204	0.190877	0.40453	0.295592	0.380811	0.306598	0.289977	0.319491	0.30296	0.254533	0.248468
13Csuc2_2		0.0477979	0.0523351	0.0645092	0.119989	0.133466	0.135847	0.0915527	0.093125	0.0878241	0.168236	0.113834	0.163339	0.106198	0.10458	0.112262	0.101571	0.0678784	0.0691362
13Csuc2_3		0.00886777	0.00898456	0.0121292	0.0156331	0.0175603	0.0177131	0.0115317	0.012493	0.0112352	0.0231937	0.0165855	0.0234003	0.0165451	0.0150896	0.0176637	0.0118821	0.00843201	0.00788396
13Csuc2_4		0.00516612	0.00619935	0.00678335	0.0113475	0.0126682	0.0134634	0.00680132	0.00722359	0.00705738	0.0146808	0.0103367	0.0157814	0.00857127	0.00916875	0.00946973	0.00580852	0.0047124	0.00507628

## Sheet: Malate
		WT			scd6edc3			dhh1			dcp2			pat1			pat1dhh1
		1	2	3	1	2	3	1	2	3	1	2	3	1	2	3	1	2	3
Malate		1738000	1651000	1726000	2545000	2297000	2545000	2185000	2361000	1918000	12100000	7905000	9233000	7172000	6205000	7164000	7628000	9424000	10250000		1738000	1738000	1738000	1738000	1738000	1738000	1738000	1738000	1738000	1738000	1738000	1738000	1738000	1738000	1738000	1738000	1738000	1738000
13CMal_1		1387000	1131000	991700	1587000	1508000	1633000	1530000	1866000	1428000	3842000	2014000	2918000	2872000	2384000	2835000	3217000	2620000	2221000		1387000	1387000	1387000	1387000	1387000	1387000	1387000	1387000	1387000	1387000	1387000	1387000	1387000	1387000	1387000	1387000	1387000	1387000
13Cmal_2		225300	331000	354400	263800	273300	274100	267300	269500	289000	957400	500200	670900	483600	439100	588900	624900	449500	456200		225300	225300	225300	225300	225300	225300	225300	225300	225300	225300	225300	225300	225300	225300	225300	225300	225300	225300
13CMal_3		1395000	1382000	1560000	2819000	2590000	2877000	3138000	2975000	2779000	3098000	2270000	3105000	2856000	2579000	2930000	2044000	1676000	1965000		1395000	1395000	1395000	1395000	1395000	1395000	1395000	1395000	1395000	1395000	1395000	1395000	1395000	1395000	1395000	1395000	1395000	1395000
13Cmal_4		431300	381300	401400	742800	713200	733400	803400	798300	733900	1118000	665200	782400	726400	725700	675700	476100	396200	394600		431300	431300	431300	431300	431300	431300	431300	431300	431300	431300	431300	431300	431300	431300	431300	431300	431300	431300
Total		5176600	4876300	5033500	7957600	7381500	8062500	7923700	8269800	7147900	21115400	13354400	16709300	14110000	12332800	14193600	13990000	14565700	15286800		5176600	5176600	5176600	5176600	5176600	5176600	5176600	5176600	5176600	5176600	5176600	5176600	5176600	5176600	5176600	5176600	5176600	5176600
Relative amounts
Malate		1	0.949942	0.993096	1.46433	1.32163	1.46433	1.25719	1.35846	1.10357	6.96203	4.54833	5.31243	4.12658	3.5702	4.12198	4.38895	5.42232	5.89758
13CMal_1		1	0.815429	0.714996	1.1442	1.08724	1.17736	1.1031	1.34535	1.02956	2.77001	1.45205	2.10382	2.07066	1.71882	2.04398	2.31939	1.88897	1.6013
13Cmal_2		1	1.46915	1.57301	1.17088	1.21305	1.2166	1.18642	1.19618	1.28273	4.24945	2.22015	2.97781	2.14647	1.94896	2.61385	2.77364	1.99512	2.02486
13CMal_3		1	0.990681	1.11828	2.02079	1.85663	2.06237	2.24946	2.13262	1.99211	2.22079	1.62724	2.22581	2.04731	1.84875	2.10036	1.46523	1.20143	1.4086
13Cmal_4		1	0.884071	0.930675	1.72224	1.65361	1.70044	1.86274	1.85092	1.7016	2.59216	1.54231	1.81405	1.68421	1.68259	1.56666	1.10387	0.918618	0.914908
Total		1	0.941989	0.972356	1.53723	1.42594	1.55749	1.53068	1.59754	1.38081	4.07901	2.57976	3.22785	2.72573	2.38241	2.74188	2.70255	2.81376	2.95306
Percentage label incorporation
Malate		1738000	1651000	1726000	2545000	2297000	2545000	2185000	2361000	1918000	12100000	7905000	9233000	7172000	6205000	7164000	7628000	9424000	10250000		5176600	4876300	5033500	7957600	7381500	8062500	7923700	8269800	7147900	21115400	13354400	16709300	14110000	12332800	14193600	13990000	14565700	15286800
13CMal_1		1387000	1131000	991700	1587000	1508000	1633000	1530000	1866000	1428000	3842000	2014000	2918000	2872000	2384000	2835000	3217000	2620000	2221000		5176600	4876300	5033500	7957600	7381500	8062500	7923700	8269800	7147900	21115400	13354400	16709300	14110000	12332800	14193600	13990000	14565700	15286800
13Cmal_2		225300	331000	354400	263800	273300	274100	267300	269500	289000	957400	500200	670900	483600	439100	588900	624900	449500	456200		5176600	4876300	5033500	7957600	7381500	8062500	7923700	8269800	7147900	21115400	13354400	16709300	14110000	12332800	14193600	13990000	14565700	15286800
13CMal_3		1395000	1382000	1560000	2819000	2590000	2877000	3138000	2975000	2779000	3098000	2270000	3105000	2856000	2579000	2930000	2044000	1676000	1965000		5176600	4876300	5033500	7957600	7381500	8062500	7923700	8269800	7147900	21115400	13354400	16709300	14110000	12332800	14193600	13990000	14565700	15286800
13Cmal_4		431300	381300	401400	742800	713200	733400	803400	798300	733900	1118000	665200	782400	726400	725700	675700	476100	396200	394600		5176600	4876300	5033500	7957600	7381500	8062500	7923700	8269800	7147900	21115400	13354400	16709300	14110000	12332800	14193600	13990000	14565700	15286800
		5176600	4876300	5033500	7957600	7381500	8062500	7923700	8269800	7147900	21115400	13354400	16709300	14110000	12332800	14193600	13990000	14565700	15286800		5176600	4876300	5033500	7957600	7381500	8062500	7923700	8269800	7147900	21115400	13354400	16709300	14110000	12332800	14193600	13990000	14565700	15286800
Malate		33.5742	33.8576	34.2903	31.982	31.1183	31.5659	27.5755	28.5497	26.8331	57.3041	59.194	55.2567	50.8292	50.313	50.4735	54.5247	64.6999	67.0513
13CMal_1		26.7936	23.1938	19.702	19.9432	20.4295	20.2543	19.3092	22.564	19.9779	18.1953	15.0812	17.4633	20.3544	19.3306	19.9738	22.995	17.9875	14.5289
13Cmal_2		4.35228	6.78793	7.04083	3.31507	3.7025	3.39969	3.37342	3.25885	4.04315	4.53413	3.74558	4.01513	3.42736	3.56042	4.14905	4.46676	3.08602	2.98427
13CMal_3		26.9482	28.3412	30.9924	35.4253	35.0877	35.6837	39.6027	35.9743	38.8786	14.6718	16.9981	18.5825	20.241	20.9117	20.6431	14.6104	11.5065	12.8542
13Cmal_4		8.33172	7.81945	7.97457	9.33447	9.66199	9.09643	10.1392	9.6532	10.2674	5.29471	4.98113	4.68242	5.14812	5.88431	4.7606	3.40315	2.72009	2.58131
		WT			scd6edc3			dhh1			dcp2			pat1			pat1dhh1
		1	2	3	1	2	3	1	2	3	1	2	3	1	2	3	1	2	3
Malate		1738000	1651000	1726000	2545000	2297000	2545000	2185000	2361000	1918000	12100000	7905000	9233000	7172000	6205000	7164000	7628000	9424000	10250000
13CMal_1		1387000	1131000	991700	1587000	1508000	1633000	1530000	1866000	1428000	3842000	2014000	2918000	2872000	2384000	2835000	3217000	2620000	2221000
13Cmal_2		225300	331000	354400	263800	273300	274100	267300	269500	289000	957400	500200	670900	483600	439100	588900	624900	449500	456200
13CMal_3		1395000	1382000	1560000	2819000	2590000	2877000	3138000	2975000	2779000	3098000	2270000	3105000	2856000	2579000	2930000	2044000	1676000	1965000
13Cmal_4		431300	381300	401400	742800	713200	733400	803400	798300	733900	1118000	665200	782400	726400	725700	675700	476100	396200	394600
Total		5176600	4876300	5033500	7957600	7381500	8062500	7923700	8269800	7147900	21115400	13354400	16709300	14110000	12332800	14193600	13990000	14565700	15286800
Malate		0.335742	0.318935	0.333423	0.491635	0.443728	0.491635	0.422092	0.456091	0.370513	2.33744	1.52706	1.7836	1.38547	1.19866	1.38392	1.47355	1.8205	1.98006
13CMal_1		0.267936	0.218483	0.191574	0.306572	0.291311	0.315458	0.295561	0.360468	0.275857	0.742186	0.389058	0.56369	0.554804	0.460534	0.547657	0.62145	0.506124	0.429046
13Cmal_2		0.0435228	0.0639416	0.0684619	0.0509601	0.0527953	0.0529498	0.0516362	0.0520612	0.0558281	0.184948	0.0966271	0.129602	0.0934204	0.084824	0.113762	0.120716	0.0868331	0.0881273
13CMal_3		0.269482	0.266971	0.301356	0.544566	0.500328	0.55577	0.606189	0.574702	0.536839	0.598462	0.438512	0.599815	0.551713	0.498203	0.566009	0.394854	0.323765	0.379593
13Cmal_4		0.0833172	0.0736584	0.0775412	0.143492	0.137774	0.141676	0.155198	0.154213	0.141773	0.215972	0.128501	0.151142	0.140324	0.140189	0.13053	0.0919716	0.0765367	0.0762276
Total

## Sheet: Pyruvte
		WT			scd6edc3			dhh1			dcp2			pat1			pat1dhh1
		1	2	3	1	2	3	1	2	3	1	2	3	1	2	3	1	2	3
Pyr		14370000	15710000	18460000	14190000	13630000	14590000	15380000	15950000	13320000	15630000	10560000	11410000	13840000	11180000	11410000	17490000	15760000	14290000		14370000	14370000	14370000	14370000	14370000	14370000	14370000	14370000	14370000	14370000	14370000	14370000	14370000	14370000	14370000	14370000	14370000	14370000
13Cpyr2_1		2036000	2265000	2606000	2007000	1867000	1966000	1678000	1776000	1471000	2289000	1120000	1429000	1556000	1330000	1253000	1924000	1461000	1255000		2036000	2036000	2036000	2036000	2036000	2036000	2036000	2036000	2036000	2036000	2036000	2036000	2036000	2036000	2036000	2036000	2036000	2036000
13Cpyr2_2		4360000	5388000	6381000	3156000	2971000	3174000	3132000	3307000	2706000	2661000	1681000	2262000	2609000	2101000	2035000	2305000	1519000	1344000		4360000	4360000	4360000	4360000	4360000	4360000	4360000	4360000	4360000	4360000	4360000	4360000	4360000	4360000	4360000	4360000	4360000	4360000
13Cpyr2_3		1158000	1479000	1732000	950400	826900	923200	780800	796200	675800	1007000	636200	709500	674000	628000	519000	612800	486200	458300		1158000	1158000	1158000	1158000	1158000	1158000	1158000	1158000	1158000	1158000	1158000	1158000	1158000	1158000	1158000	1158000	1158000	1158000
Relative amounts
Pyr		1	1.09325	1.28462	0.987474	0.948504	1.01531	1.07029	1.10995	0.926931	1.08768	0.734864	0.794015	0.963118	0.77801	0.794015	1.21712	1.09673	0.994433
13Cpyr2_1		1	1.11248	1.27996	0.985756	0.916994	0.965619	0.824165	0.872299	0.722495	1.12426	0.550098	0.701866	0.764244	0.653242	0.615422	0.94499	0.717583	0.616405
13Cpyr2_2		1	1.23578	1.46353	0.723853	0.681422	0.727982	0.718349	0.758486	0.620642	0.610321	0.38555	0.518807	0.598394	0.481881	0.466743	0.52867	0.348394	0.308257
13Cpyr2_3		1	1.2772	1.49568	0.820725	0.714076	0.797237	0.674266	0.687565	0.583592	0.869603	0.549396	0.612694	0.582038	0.542314	0.448187	0.529188	0.419862	0.395769
Percentage label incorporation
Pyr		14370000	15710000	18460000	14190000	13630000	14590000	15380000	15950000	13320000	15630000	10560000	11410000	13840000	11180000	11410000	17490000	15760000	14290000		21924000	24842000	29179000	20303400	19294900	20653200	20970800	21829200	18172800	21587000	13997200	15810500	18679000	15239000	15217000	22331800	19226200	17347300
13Cpyr2_1		2036000	2265000	2606000	2007000	1867000	1966000	1678000	1776000	1471000	2289000	1120000	1429000	1556000	1330000	1253000	1924000	1461000	1255000		21924000	24842000	29179000	20303400	19294900	20653200	20970800	21829200	18172800	21587000	13997200	15810500	18679000	15239000	15217000	22331800	19226200	17347300
13Cpyr2_2		4360000	5388000	6381000	3156000	2971000	3174000	3132000	3307000	2706000	2661000	1681000	2262000	2609000	2101000	2035000	2305000	1519000	1344000		21924000	24842000	29179000	20303400	19294900	20653200	20970800	21829200	18172800	21587000	13997200	15810500	18679000	15239000	15217000	22331800	19226200	17347300
13Cpyr2_3		1158000	1479000	1732000	950400	826900	923200	780800	796200	675800	1007000	636200	709500	674000	628000	519000	612800	486200	458300		21924000	24842000	29179000	20303400	19294900	20653200	20970800	21829200	18172800	21587000	13997200	15810500	18679000	15239000	15217000	22331800	19226200	17347300
		21924000	24842000	29179000	20303400	19294900	20653200	20970800	21829200	18172800	21587000	13997200	15810500	18679000	15239000	15217000	22331800	19226200	17347300
Pyr		65.5446	63.2397	63.2647	69.8898	70.6404	70.6428	73.3401	73.0673	73.2964	72.4047	75.4437	72.1672	74.0939	73.3644	74.9819	78.3188	81.9715	82.3759
13Cpyr2_1		9.28663	9.11762	8.93108	9.88504	9.67613	9.51911	8.0016	8.13589	8.09451	10.6036	8.0016	9.0383	8.33021	8.72761	8.23421	8.61552	7.59901	7.23456
13Cpyr2_2		19.8869	21.6891	21.8685	15.5442	15.3979	15.3681	14.9351	15.1494	14.8904	12.3269	12.0095	14.3069	13.9676	13.787	13.3732	10.3216	7.90068	7.7476
13Cpyr2_3		5.28188	5.95363	5.93578	4.68099	4.28559	4.47001	3.72327	3.64741	3.71874	4.66484	4.54519	4.48752	3.60833	4.12101	3.41066	2.74407	2.52884	2.64191

## Sheet: Glyoxylate
		WT			scd6edc3			dhh1			dcp2			pat1			pat1dhh1
		1	2	3	1	2	3	1	2	3	1	2	3	1	2	3	1	2	3
Glyoxylate		2143000	2167000	2550000	1661000	1543000	1696000	1773000	1876000	1734000	1857000	1301000	1448000	1178000	1088000	1087000	1443000	1434000	1385000		2143000	2143000	2143000	2143000	2143000	2143000	2143000	2143000	2143000	2143000	2143000	2143000	2143000	2143000	2143000	2143000	2143000	2143000
13CGlyox_1		279000	364100	419100	257800	249200	280500	265700	281900	284200	285200	274600	289900	197400	201800	223700	203400	214300	216400		279000	279000	279000	279000	279000	279000	279000	279000	279000	279000	279000	279000	279000	279000	279000	279000	279000	279000
13Cglyoxylate_2		928700	795600	803100	864900	717800	791800	1043000	976600	782800	4243000	604600	866900	1481000	1086000	994200	2508000	1608000	1288000		928700	928700	928700	928700	928700	928700	928700	928700	928700	928700	928700	928700	928700	928700	928700	928700	928700	928700
Relative amounts
Glyoxylate		1	1.0112	1.18992	0.775082	0.720019	0.791414	0.827345	0.875408	0.809146	0.866542	0.607093	0.675688	0.549697	0.507699	0.507233	0.673355	0.669155	0.64629
13CGlyox_1		1	1.30502	1.50215	0.924014	0.89319	1.00538	0.95233	1.01039	1.01864	1.02222	0.984229	1.03907	0.707527	0.723297	0.801792	0.729032	0.7681	0.775627
13Cglyoxylate_2		1	0.856681	0.864757	0.931302	0.772908	0.85259	1.12308	1.05158	0.842899	4.56875	0.651018	0.933455	1.5947	1.16938	1.07053	2.70055	1.73145	1.38688
Glyoxylate		2143000	2167000	2550000	1661000	1543000	1696000	1773000	1876000	1734000	1857000	1301000	1448000	1178000	1088000	1087000	1443000	1434000	1385000		3350700	3326700	3772200	2783700	2510000	2768300	3081700	3134500	2801000	6385200	2180200	2604800	2856400	2375800	2304900	4154400	3256300	2889400
13CGlyox_1		279000	364100	419100	257800	249200	280500	265700	281900	284200	285200	274600	289900	197400	201800	223700	203400	214300	216400		3350700	3326700	3772200	2783700	2510000	2768300	3081700	3134500	2801000	6385200	2180200	2604800	2856400	2375800	2304900	4154400	3256300	2889400
13Cglyoxylate_2		928700	795600	803100	864900	717800	791800	1043000	976600	782800	4243000	604600	866900	1481000	1086000	994200	2508000	1608000	1288000		3350700	3326700	3772200	2783700	2510000	2768300	3081700	3134500	2801000	6385200	2180200	2604800	2856400	2375800	2304900	4154400	3256300	2889400
		3350700	3326700	3772200	2783700	2510000	2768300	3081700	3134500	2801000	6385200	2180200	2604800	2856400	2375800	2304900	4154400	3256300	2889400
Glyoxylate		63.9568	65.1396	67.5998	59.6688	61.4741	61.265	57.5332	59.8501	61.9065	29.0829	59.6734	55.5897	41.2407	45.7951	47.1604	34.7343	44.0377	47.9338
13CGlyox_1		8.32662	10.9448	11.1102	9.26106	9.92829	10.1326	8.62186	8.99346	10.1464	4.46658	12.5952	11.1295	6.9108	8.49398	9.70541	4.89601	6.58109	7.48944
13Cglyoxylate_2		27.7166	23.9156	21.29	31.0702	28.5976	28.6024	33.845	31.1565	27.9472	66.4505	27.7314	33.2809	51.8485	45.7109	43.1342	60.3697	49.3812	44.5767
