# Supplementary material for: Decapping activators Edc3 and Scd6 act redundantly with Dhh1 in post-transcriptional repression of starvation-induced pathways
Source: eLife. 2025 Nov 25;13:RP102287. doi: 10.7554/eLife.102287 (PMC12646578; doi:10.7554/eLife.102287)
Supplement: Figure 8—source data 2. — Sheets 2–3 provide source data for measurements of ATP content in three biological replicates of the indicated five mutants vs. wild-type (WT) and the fraction of total ATP content that is eliminated by inhibiting respiration by sodium azide treatment. Sheet 4 shows the standard curve produced using pure ATP employed to determine the ATP content in cell extracts. [file elife-102287-fig8-data2.xlsx]

## Sheet: Notes
Source file for Ethanol and ATP production from cultured yeast cells; mutants (dhh1∆, pat1∆, dhh1∆pat1∆, edc3∆scd6∆ and dcp2∆) and WT
	Sheet_Index	Sheet_Name	Contents
	1	Notes	This page
	2	ATP Production_Mutant vs WT	Average and Relative ATP production mutants vs WT, SEM, p-value
	3	ATP production by respiration	Fraction of ATP production from respiration in mutants vs WT, SEM, p-value
	4	ATP Standard Curve	ATP standard curve

## Sheet: ATP Production_Mutant vs WT
		Firefly luciferase unit
	Well	1	2	3	4	5	6	Replicate	Inhibitor
	A	2323743	1808961	3661880	889923	1222137	1054209	Rep_1	Untreated
	B	2183012	1616189	3801123	983605	1184685	914083	Rep_2			M	9000000
	C	2214184	1684219	3295702	810076	1202517	885086	Rep_3			C	188235
	D	1296311	627017	775114	433857	514427	341442	Rep_1	NaN3
	E	1322013	581006	826279	496888	533972	323845	Rep_2
	F	1226087	621579	902499	426143	442100	340642	Rep_3
	Strain	WT	dhh1∆	pat1∆	pat1∆dhh1∆	scd6∆edc3∆	dcp2∆
	G	778	Substrate with blank
	Untreated
	Firefly luciferase unit				Cells OD 600				5 OD cell volume in ml				ATP (µM)				dilution Factor		ATP (µM)/OD Unit					Average ATP (µM)/OD Unit			t-Test		Relative ATP (µM)					Relative Average ATP			t-Test
Strain	Rep_1	Rep_2	Rep_3		Rep_1	Rep_2	Rep_3		Rep_1	Rep_2	Rep_3		Rep_1	Rep_2	Rep_3		50	Strain	Rep_1	Rep_2	Rep_3		Strain	ATP (µM)	STDEV	SEM	p-Value		Rep_1	Rep_2	Rep_3		Strain	ATP (µM)	STDEV	SEM	p-Value
WT	2323743	2183012	2214184		0.626	0.63	0.675		7.98722	7.93651	7.40741		0.237279	0.221642	0.225105		Cell OD Unit	WT	2.37279	2.21642	2.25105		WT	2.28009	0.0821272	0.0474161			1	1	1		WT	1	0	0
dhh1∆	1808961	1616189	1684219		0.695	0.676	0.562		7.19424	7.39645	8.8968		0.180081	0.158662	0.16622		5	dhh1∆	1.80081	1.58662	1.6622		dhh1∆	1.68321	0.108629	0.0627172	0.00214259		0.758942	0.715846	0.738411		dhh1∆	0.737733	0.0215556	0.0124451	0.00224414
pat1∆	3661880	3801123	3295702		0.642	0.601	0.568		7.78816	8.31947	8.80282		0.385961	0.401432	0.345274			pat1∆	3.85961	4.01432	3.45274		pat1∆	3.77556	0.290071	0.167472	0.00830569		1.62661	1.81117	1.53383		pat1∆	1.65721	0.141179	0.0815097	0.015036
pat1∆dhh1∆	889923	983605	810076		0.72	0.594	0.78		6.94444	8.41751	6.41026		0.0779653	0.0883744	0.0690934			pat1∆dhh1∆	0.779653	0.883744	0.690934		pat1∆dhh1∆	0.784777	0.0965071	0.0557184	4.11155e-05		0.328581	0.398726	0.306938		pat1∆dhh1∆	0.344749	0.0479823	0.0277026	0.00178263
scd6∆edc3∆	1222137	1184685	1202517		0.673	0.599	0.666		7.42942	8.34725	7.50751		0.114878	0.110717	0.112698			scd6∆edc3∆	1.14878	1.10717	1.12698		scd6∆edc3∆	1.12764	0.0208146	0.0120173	0.000955025		0.484148	0.49953	0.500645		scd6∆edc3∆	0.494774	0.00921952	0.00532289	0.000110982
dcp2∆	1054209	914083	885086		0.714	0.743	0.788		7.0028	6.72948	6.34518		0.0962193	0.0806498	0.0774279			dcp2∆	0.962193	0.806498	0.774279		dcp2∆	0.847657	0.100491	0.0580187	5.88397e-05		0.405512	0.363874	0.343963		dcp2∆	0.371116	0.0314072	0.0181329	0.000830338
	5 mM NaN3				Cells OD 600				5 OD cell volume in ml				ATP (µM)						ATP (µM)/OD Unit					Average ATP (µM)/OD Unit			t-Test		Relative ATP (µM)					Relative Average ATP			t-Test
Strain	Rep_1	Rep_2	Rep_3		Rep_1	Rep_2	Rep_3		Rep_1	Rep_2	Rep_3		Rep_1	Rep_2	Rep_3			Strain	Rep_1	Rep_2	Rep_3		Strain	ATP (µM)	STDEV	SEM	p-Value		Rep_1	Rep_2	Rep_3		Strain	ATP (µM)	STDEV	SEM	p-Value
WT	1296311	1322013	1226087		0.686	0.683	0.71		7.28863	7.32064	7.04225		0.12312	0.125975	0.115317			WT	1.2312	1.25975	1.15317		WT	1.21471	0.0551724	0.0318538			1	1	1		WT	1	0	0
dhh1∆	627017	581006	621579		0.776	0.749	0.722		6.4433	6.67557	6.92521		0.0487536	0.0436412	0.0481493			dhh1∆	0.487536	0.436412	0.481493		dhh1∆	0.46848	0.0279357	0.0161287	0.000259743		0.395985	0.346427	0.417539		dhh1∆	0.386651	0.0364638	0.0210524	0.00117603
pat1∆	775114	826279	902499		0.725	0.69	0.643		6.89655	7.24638	7.77605		0.0652088	0.0708938	0.0793627			pat1∆	0.652088	0.708938	0.793627		pat1∆	0.718217	0.0712243	0.0411214	0.000898034		0.529638	0.562759	0.688214		pat1∆	0.593537	0.0836482	0.0482943	0.0138252
pat1∆dhh1∆	433857	496888	426143		0.736	0.608	0.811		6.79348	8.22368	6.16523		0.0272913	0.0342948	0.0264342			pat1∆dhh1∆	0.272913	0.342948	0.264342		pat1∆dhh1∆	0.293401	0.0431222	0.0248966	3.46459e-05		0.221665	0.272234	0.229231		pat1∆dhh1∆	0.241044	0.0272754	0.0157475	0.000430237
scd6∆edc3∆	514427	533972	442100		0.722	0.644	0.699		6.92521	7.76398	7.15308		0.0362436	0.0384152	0.0282072			scd6∆edc3∆	0.362436	0.384152	0.282072		scd6∆edc3∆	0.342887	0.0537745	0.0310467	4.01624e-05		0.294377	0.304942	0.244606		scd6∆edc3∆	0.281309	0.0322212	0.0186029	0.000669329
dcp2∆	341442	323845	340642		0.746	0.769	0.806		6.70241	6.50195	6.20347		0.017023	0.0150678	0.0169341			dcp2∆	0.17023	0.150678	0.169341		dcp2∆	0.163416	0.0110408	0.00637443	0.00060929		0.138264	0.119609	0.146848		dcp2∆	0.134907	0.0139266	0.00804051	8.63745e-05
			Average ATP (µM)/OD Unit
			ATP (µM)	ATP (µM)	Untreated	Sod. Azide
		Strain	Untreated	Sod. Azide	SEM	SEM
		WT	2.28009	1.21471	0.0474161	0.0318538
		dhh1∆	1.68321	0.46848	0.0627172	0.0161287
		pat1∆	3.77556	0.718217	0.167472	0.0411214
		pat1∆dhh1∆	0.784777	0.293401	0.0557184	0.0248966
		scd6∆edc3∆	1.12764	0.342887	0.0120173	0.0310467
		dcp2∆	0.847657	0.163416	0.0580187	0.00637443

## Sheet: Fraction ATP from respiration
		Untreated
		ATP (µM)/OD Unit					ATP (µM) produced by respiration				Average ATP produced by respiration
	Strain	Rep_1	Rep_2	Rep_3		Strain	Rep_1	Rep_2	Rep_3	Strain	ATP (µM)	STDEV	SEM	t-Test
	WT	2.37279	2.21642	2.25105		WT	0.481118	0.431627	0.487721	WT	0.466822	0.0306581	0.0177005	p-Value
	dhh1∆	1.80081	1.58662	1.6622		dhh1∆	0.729268	0.724941	0.710328	dhh1∆	0.721513	0.00992451	0.00572992	0.00239736	WT:d1
	pat1∆	3.85961	4.01432	3.45274		pat1∆	0.831048	0.823398	0.770146	pat1∆	0.808197	0.0331747	0.0191534	0.000204126	WT:p1
	pat1∆dhh1∆	0.779653	0.883744	0.690934		pat1∆dhh1∆	0.649956	0.611938	0.617413	pat1∆dhh1∆	0.626436	0.020552	0.0118657	0.00285133	WT:p1d1
	scd6∆edc3∆	1.14878	1.10717	1.12698		scd6∆edc3∆	0.684504	0.653031	0.74971	scd6∆edc3∆	0.695748	0.0493103	0.0284693	0.00449577	WT:s6e3
	dcp2∆	0.962193	0.806498	0.774279		dcp2∆	0.823081	0.81317	0.781292	dcp2∆	0.805848	0.0218358	0.0126069	0.000190597	WT:dcp2
		5 mM NaN3												**	< 0.005
		ATP (µM)/OD Unit					Relative ATP prdoction by respiration							*	< 0.05
	Strain	Rep_1	Rep_2	Rep_3		Strain	Rep_1	Rep_2	Rep_3	Strain	ATP	STDEV	SEM	t-Test	p-Value
	WT	1.2312	1.25975	1.15317		WT	1	1	1	WT	1	0	0	p-Value
	dhh1∆	0.487536	0.436412	0.481493		dhh1∆	1.51578	1.67956	1.45643	dhh1∆	1.55059	0.115567	0.0667225	0.0143699	WT:d1
	pat1∆	0.652088	0.708938	0.793627		pat1∆	1.72733	1.90766	1.57907	pat1∆	1.73802	0.164556	0.0950063	0.0161709	WT:p1
	pat1∆dhh1∆	0.272913	0.342948	0.264342		pat1∆dhh1∆	1.35093	1.41775	1.26592	pat1∆dhh1∆	1.34486	0.0760971	0.0439347	0.0158453	WT:p1d1
	scd6∆edc3∆	0.362436	0.384152	0.282072		scd6∆edc3∆	1.42274	1.51295	1.53717	scd6∆edc3∆	1.49095	0.0603065	0.034818	0.0049919	WT:s6e3
	dcp2∆	0.17023	0.150678	0.169341		dcp2∆	1.71077	1.88397	1.60193	dcp2∆	1.73222	0.142239	0.0821219	0.0123462	WT:dcp2

## Sheet: ATP Standard Curve
		1	2	3	4	5	6	7	8	9	10	11
Firefly Luciferase Unit		485	87658	193905	455628	999268	2018881	3994406	5840131	7683602	9235974	17574618	Firefly Luciferase Unit
ATP Conc. (µM)		0	0.01	0.02	0.05	0.1	0.2	0.4	0.6	0.8	1	2	ATP Conc. (µM)
	ATP (µM)	Firefly Luciferase Unit										M	9000000
	0	485										C	188235
	0.01	87658
	0.02	193905
	0.05	455628
	0.1	999268
	0.2	2018881
	0.4	3994406
	0.6	5840131
	0.8	7683602
	1	9235974
	2	17574618
