# Supplementary material for: Decapping activators Edc3 and Scd6 act redundantly with Dhh1 in post-transcriptional repression of starvation-induced pathways
Source: eLife. 2025 Nov 25;13:RP102287. doi: 10.7554/eLife.102287 (PMC12646578; doi:10.7554/eLife.102287)
Supplement: Source data 1. — Sheets 1-7 labeled ‘mutant vs WT all comp’ contain the processed data from Ribo-seq and RNA-seq analysis of two or three biological replicates of each strain listing the fold changes in mRNA, ribosome-protected fragments (RPFs), or translational efficiency (TE) between the relevant mutant vs. WT with the p-values and adjusted p-values (FDRs) assigned by DESeq2 analysis. The data for dhh1∆, dcp2∆ (Zeidan et al., 2018), pat1∆, and pat1∆dhh1∆ mutants (Vijjamarri et al., 2023a) were reported previously. Sheet ‘Gene groups_mRNA analysis’ contains the lists of mRNAs (identified by systematic gene name) that are up-regulated or down-regulated in abundance by ≥1.5-fold at FDR < 0.05 in the scd6∆, edc3∆, or scd6∆edc3∆ mutants vs. WT, either including or excluding iESR mRNAs for up-regulated transcripts or rESR mRNAs for down-regulated transcripts, as indicated. It also lists the transcripts belonging to the three sectors of Figs. 1B-C, the iESR and rESR transcripts defined previously (Gasch et al., 2000), and all of the non-iESR mRNAs up-regulated by ≥1.5-fold at FDR < 0.05 in dhh1∆, pat1∆, or pat1∆dhh1∆ mutants, as well as those equally up-regulated by the dcp2∆ mutation. Sheet ‘Gene groups_TE analysis’ contains the lists of mRNAs that are up-regulated or down-regulated in TE by ≥1.41-fold at FDR <0.10 in the different mutants vs. WT. Sheet ‘Gene groups_RPF analysis’ contains the lists of mRNAs that are up-regulated or down-regulated in RPFs by ≥1.5-fold at FDR <0.05 in the different mutants vs. WT. Sheet ‘Pathway gene groups’ lists the genes involved in specific pathways (e.g. Ox. Phos.) analyzed for changes in expression or translation. Sheet ‘Codon Opt Scores nonESR mRNAs’ lists the tRNA adaptation index (tAI), species-specific tRNA adaptation index (stAI), and the average codon stabilization coefficient (AvgCSC) for all non-ESR yeast genes (Presnyak et al., 2015; Radhakrishnan et al., 2016). Sheet ‘Codon Protection Indices’ lists the CPI values for all genes determined [file elife-102287-data1.xlsx]

## Sheet: Notes
Sheets 1-7 labeled "mutant vs WT all comp" contain the processed data from Ribo-seq and RNA-seq analysis of 2 or 3 biological replicates of each strain listing the fold-changes in mRNA, RPFs, or TE between the relevant mutant vs. WT with the P-values and adjusted P-values (FDRs) assigned by DESeq2 analysis. The data for dhh1∆, dcp2∆ (Zeidan et al. 2018), pat1∆, and dhh1∆pat1∆ mutants {Vijjamarri,…

## Sheet: scd6 v WT all comp
gene_id	scd6_d TE Change (log2FoldChange)	pvalue	FDR (padj)		gene_id	scd6_d TE (log2FoldChange)	pvalue	FDR (padj)		gene_id	WT TE (log2FoldChange)	pvalue	FDR (padj)		gene_id	Ribo Change (log2FoldChange)	pvalue	FDR (padj)		gene_id	mRNA Change (log2FoldChange)	pvalue	FDR (padj)
YPR129W	-1.77439	0.230824	0.982177		YPR129W	-1.77447	0.230115	0.256585		YPR129W	-8.26656e-05	0.999179	0.999179		YPR129W	-11.5666	1.01985e-15	8.37089e-13		YPR129W	-9.79223	4.14948e-183	2.16852e-179
YOL058W	0.0339436	0.745249	0.999031		YOL058W	0.566134	4.2395e-14	9.97318e-14		YOL058W	0.53219	2.62072e-13	6.46742e-13		YOL058W	-0.824896	1.38757e-26	2.84729e-23		YOL058W	-0.85884	2.39678e-34	6.2628e-31
YJL088W	0.176654	0.239201	0.982177		YJL088W	0.770528	1.92671e-12	4.23467e-12		YJL088W	0.593874	7.34745e-09	1.47178e-08		YJL088W	-0.946543	8.92456e-17	9.1566e-14		YJL088W	-1.1232	1.73485e-30	3.0221e-27
YOR182C	0.898664	9.78448e-12	2.17215e-08		YOR182C	4.53765	0	0		YOR182C	3.63899	0	0		YOR182C	-0.108881	0.233876	0.648032		YOR182C	-1.00754	3.28895e-26	4.29701e-23
YDL061C	0.85974	3.04092e-15	1.35017e-11		YDL061C	4.86477	0	0		YDL061C	4.00503	0	0		YDL061C	0.0612728	0.402597	0.788676		YDL061C	-0.798467	4.55172e-23	4.75746e-20
YJL189W	0.917413	7.55532e-10	1.11819e-06		YJL189W	4.4995	0	0		YJL189W	3.58209	2.02201e-254	1.08346e-252		YJL189W	-0.0505648	0.627982	0.885727		YJL189W	-0.967978	9.73098e-20	8.47569e-17
YOR303W	-0.371059	0.000719569	0.0550843		YOR303W	-1.02236	1.09852e-37	5.03336e-37		YOR303W	-0.651298	5.8684e-18	1.738e-17		YOR303W	-0.975281	2.41047e-30	9.89258e-27		YOR303W	-0.604221	2.33266e-18	1.52381e-15
YPR160W	0.141557	0.450975	0.999031		YPR160W	-0.149562	0.222049	0.248212		YPR160W	-0.291119	0.0408505	0.0506756		YPR160W	1.15763	4.34364e-15	2.97105e-12		YPR160W	1.01607	2.16502e-18	1.52381e-15
YLR287C-A	0.650276	6.87236e-07	0.000254277		YLR287C-A	3.54623	0	0		YLR287C-A	2.89596	1.99692e-215	8.75468e-214		YLR287C-A	-0.145065	0.114769	0.49512		YLR287C-A	-0.795341	1.46312e-17	8.49588e-15
YNL135C	0.55172	2.50158e-08	2.2214e-05		YNL135C	4.1999	0	0		YNL135C	3.64818	0	0		YNL135C	-0.036243	0.587972	0.868054		YNL135C	-0.587963	7.79363e-16	4.07295e-13
YEL011W	0.134164	0.537695	0.999031		YEL011W	-0.391139	0.00417879	0.00557461		YEL011W	-0.525303	0.00194517	0.00275629		YEL011W	1.09543	1.13013e-09	4.21641e-07		YEL011W	0.961269	4.50545e-15	2.1405e-12
YPR043W	0.578122	3.99609e-08	2.53467e-05		YPR043W	3.81426	0	0		YPR043W	3.23614	0	0		YPR043W	-0.00580654	0.937285	0.983535		YPR043W	-0.583929	7.47818e-15	3.25675e-12
YLR167W	0.538822	2.10006e-07	9.32428e-05		YLR167W	1.81728	2.41983e-135	4.76311e-134		YLR167W	1.27846	6.56609e-68	6.83416e-67		YLR167W	-0.02514	0.732318	0.930159		YLR167W	-0.563962	1.44555e-14	5.81112e-12
YML024W	0.483153	3.95092e-06	0.00116947		YML024W	2.49994	6.45969e-250	2.70886e-248		YML024W	2.01679	2.49436e-163	7.29034e-162		YML024W	-0.0851082	0.25068	0.668143		YML024W	-0.568261	1.59962e-14	5.97116e-12
YFR032C-A	0.623991	7.50185e-06	0.00185046		YFR032C-A	3.75691	0	0		YFR032C-A	3.13292	1.93144e-222	8.80099e-221		YFR032C-A	-0.116939	0.232432	0.647785		YFR032C-A	-0.74093	7.59364e-14	2.64562e-11
YLR388W	0.601276	3.01655e-05	0.00478339		YLR388W	5.59131	0	0		YLR388W	4.99003	0	0		YLR388W	-0.170119	0.0748053	0.409468		YLR388W	-0.771395	8.91855e-13	2.91302e-10
YJR123W	0.328912	0.000202774	0.0204618		YJR123W	1.86231	1.44497e-194	4.20204e-193		YJR123W	1.5334	1.7471e-132	4.0933e-131		YJR123W	-0.116325	0.0634553	0.380176		YJR123W	-0.445237	1.06282e-12	3.26724e-10
YDR500C	0.619745	9.99726e-07	0.000341445		YDR500C	1.14652	1.52435e-37	6.92962e-37		YDR500C	0.52677	4.18927e-09	8.50941e-09		YDR500C	-0.00605305	0.946426	0.985155		YDR500C	-0.625798	2.14772e-12	6.23554e-10
YNL244C	0.470987	1.9037e-05	0.00325094		YNL244C	2.37263	2.60476e-204	8.06082e-203		YNL244C	1.90164	2.4503e-131	5.62695e-130		YNL244C	-0.0713252	0.363376	0.75973		YNL244C	-0.542312	2.28782e-12	6.29271e-10
YER074W	0.478551	9.74532e-06	0.00216346		YER074W	4.0445	0	0		YER074W	3.56595	0	0		YER074W	-0.0590899	0.436661	0.80517		YER074W	-0.537641	2.99889e-12	7.8361e-10
YDL130W	0.409639	2.07603e-05	0.00341392		YDL130W	3.69345	0	0		YDL130W	3.28381	0	0		YDL130W	-0.0696472	0.300106	0.715234		YDL130W	-0.479287	3.43328e-12	8.54396e-10
YER072W	0.51466	2.43592e-07	9.83227e-05		YER072W	3.94564	0	0		YER072W	3.43098	0	0		YER072W	0.0177457	0.79595	0.955932		YER072W	-0.496915	6.33444e-12	1.50472e-09
YLR262C-A	0.957551	3.15012e-08	2.33109e-05		YLR262C-A	4.25712	2.98679e-257	1.28034e-255		YLR262C-A	3.29957	3.62031e-165	1.09118e-163		YLR262C-A	0.0597157	0.598043	0.87531		YLR262C-A	-0.897835	6.81992e-12	1.5496e-09
YER069W	0.0646191	0.615284	0.999031		YER069W	-0.196071	0.031884	0.0392247		YER069W	-0.26069	0.00395798	0.00543284		YER069W	-0.526831	2.92095e-08	8.56254e-06		YER069W	-0.59145	8.81065e-12	1.91852e-09
YHR128W	0.343098	0.000714776	0.0550843		YHR128W	1.59258	1.51094e-109	2.25355e-108		YHR128W	1.24948	7.0479e-68	7.32248e-67		YHR128W	-0.135851	0.0616838	0.374826		YHR128W	-0.478949	1.22667e-11	2.56422e-09
YMR303C	0.322591	0.000469632	0.0393428		YMR303C	2.1791	6.66791e-245	2.71741e-243		YMR303C	1.85651	3.99751e-178	1.35284e-176		YMR303C	-0.104966	0.108017	0.485151		YMR303C	-0.427558	5.20495e-11	1.00745e-08
YCL064C	-0.00165623	0.990455	0.999459		YCL064C	0.646263	7.45402e-11	1.54059e-10		YCL064C	0.64792	1.89947e-11	4.31406e-11		YCL064C	-0.590648	2.15147e-08	6.79202e-06		YCL064C	-0.588992	5.04914e-11	1.00745e-08
YNL149C	0.662181	1.62597e-05	0.00313883		YNL149C	2.24018	6.12048e-95	7.6665e-94		YNL149C	1.578	1.30714e-47	9.01601e-47		YNL149C	-0.00479289	0.965599	0.991375		YNL149C	-0.666974	3.18008e-10	5.9354e-08
YDL083C	0.458985	1.83348e-05	0.00325094		YDL083C	2.07923	5.09916e-166	1.26106e-164		YDL083C	1.62025	2.17895e-101	3.65495e-100		YDL083C	-0.0152841	0.840469	0.961997		YDL083C	-0.474269	3.4923e-10	6.11195e-08
YDR276C	0.742923	1.97493e-08	2.19217e-05		YDR276C	5.51156	0	0		YDR276C	4.76864	0	0		YDR276C	0.0740327	0.34501	0.750057		YDR276C	-0.66889	3.50858e-10	6.11195e-08
YLR185W	0.518802	5.16615e-06	0.00143361		YLR185W	2.64955	6.78345e-238	2.67046e-236		YLR185W	2.13075	2.75943e-154	7.46207e-153		YLR185W	0.0179876	0.8232	0.961018		YLR185W	-0.500815	4.84722e-10	8.17147e-08
YOR153W	0.0183956	0.843735	0.999031		YOR153W	-1.27756	3.55332e-84	3.85799e-83		YOR153W	-1.29595	3.46675e-85	4.73162e-84		YOR153W	0.420628	3.28018e-10	1.68273e-07		YOR153W	0.402232	6.2264e-10	1.01685e-07
YMR105C	0.671975	0.000300501	0.0283877		YMR105C	0.811545	5.88809e-12	1.26671e-11		YMR105C	0.139569	0.331441	0.364163		YMR105C	1.37199	9.01177e-21	1.23281e-17		YMR105C	0.700018	8.40395e-10	1.33088e-07
YDR077W	0.0248952	0.798296	0.999031		YDR077W	-0.115225	0.0940569	0.11005		YDR077W	-0.14012	0.0421373	0.0521824		YDR077W	0.443196	1.3944e-10	8.17519e-08		YDR077W	0.4183	1.13499e-09	1.74455e-07
YDR171W	0.185885	0.348674	0.999031		YDR171W	-0.0650366	0.623907	0.652312		YDR171W	-0.250922	0.0888561	0.105805		YDR171W	0.953074	4.56076e-10	2.07971e-07		YDR171W	0.767189	1.26596e-09	1.89026e-07
YOR167C	0.76838	3.72951e-06	0.00116947		YOR167C	7.28741	0	0		YOR167C	6.51903	0	0		YOR167C	-0.0427023	0.663854	0.902138		YOR167C	-0.811082	1.39369e-09	2.02318e-07
YOL120C	0.301855	0.00153041	0.0943753		YOL120C	1.28193	8.29997e-81	8.56184e-80		YOL120C	0.980073	6.19015e-48	4.29525e-47		YOL120C	-0.100624	0.136302	0.521327		YOL120C	-0.402479	2.06866e-09	2.92184e-07
YGL103W	0.383273	0.00035036	0.0324083		YGL103W	2.84075	1.92629e-307	1.08227e-305		YGL103W	2.45748	2.06979e-230	9.81793e-229		YGL103W	-0.0578794	0.444887	0.808599		YGL103W	-0.441153	6.04804e-09	8.31765e-07
YOL109W	0.382759	0.000100367	0.0120441		YOL109W	2.88922	0	0		YOL109W	2.50647	1.17289e-283	7.22074e-282		YOL109W	-0.0200656	0.772608	0.948585		YOL109W	-0.402825	7.57963e-09	1.01567e-06
YER067W	-0.090438	0.681608	0.999031		YER067W	0.814536	4.02507e-08	7.32027e-08		YER067W	0.904974	2.83778e-08	5.49055e-08		YER067W	0.736381	8.72976e-06	0.000942814		YER067W	0.826819	1.32156e-08	1.72662e-06
YDR258C	0.0913586	0.509792	0.999031		YDR258C	0.546935	1.24847e-08	2.31864e-08		YDR258C	0.455577	5.1051e-06	8.74836e-06		YDR258C	0.621932	9.21223e-10	3.7807e-07		YDR258C	0.530573	1.8337e-08	2.33729e-06
YGL195W	0.00405484	0.963764	0.999031		YGL195W	-1.32789	1.20518e-99	1.59596e-98		YGL195W	-1.33194	1.56858e-97	2.52851e-96		YGL195W	0.34907	7.16824e-08	1.7305e-05		YGL195W	0.345015	1.89428e-08	2.35703e-06
YLR264W	0.547022	4.52972e-05	0.00640242		YLR264W	5.70412	0	0		YLR264W	5.1571	0	0		YLR264W	-0.0443842	0.591663	0.870006		YLR264W	-0.591406	2.10836e-08	2.56239e-06
YER117W	0.265223	0.00377688	0.169387		YER117W	2.1494	7.73369e-242	3.10798e-240		YER117W	1.88417	5.86614e-186	2.06996e-184		YER117W	-0.0953823	0.141422	0.531274		YER117W	-0.360605	2.42707e-08	2.88269e-06
YFR009W	-0.0913762	0.352767	0.999031		YFR009W	-0.062562	0.360742	0.390427		YFR009W	0.0288142	0.683166	0.710037		YFR009W	0.275137	0.000165643	0.0108981		YFR009W	0.366513	2.57853e-08	2.99453e-06
YGR034W	0.271115	0.00733748	0.250603		YGR034W	2.76126	0	0		YGR034W	2.49014	1.51902e-265	8.53452e-264		YGR034W	-0.124366	0.0816789	0.427625		YGR034W	-0.395481	3.28253e-08	3.72924e-06
YBR263W	0.116612	0.216154	0.982177		YBR263W	0.265079	6.92332e-05	0.000105158		YBR263W	0.148467	0.026058	0.0329829		YBR263W	-0.241247	0.000423317	0.0201007		YBR263W	-0.357859	3.42575e-08	3.80914e-06
YOL077W-A	0.56315	4.06618e-05	0.00601795		YOL077W-A	2.03429	3.17019e-99	4.16952e-98		YOL077W-A	1.47114	4.37548e-51	3.27566e-50		YOL077W-A	0.0489219	0.626369	0.885504		YOL077W-A	-0.514228	3.74851e-08	4.08119e-06
YNL160W	-0.103091	0.42905	0.999031		YNL160W	0.184164	0.0423573	0.0515612		YNL160W	0.287255	0.00215097	0.00303898		YNL160W	0.380845	7.17329e-05	0.006008		YNL160W	0.483936	4.20814e-08	4.48811e-06
YMR143W	0.391533	0.000110502	0.0129113		YMR143W	2.23714	1.05718e-214	3.5777e-213		YMR143W	1.8456	3.45342e-146	8.76532e-145		YMR143W	0.00167656	0.981367	0.994374		YMR143W	-0.389857	4.8128e-08	5.03034e-06
YKR057W	0.620635	1.59182e-05	0.00313883		YKR057W	4.54778	0	0		YKR057W	3.92714	0	0		YKR057W	0.0557242	0.575935	0.861151		YKR057W	-0.564911	5.12996e-08	5.2567e-06
YPL249C-A	0.321054	0.00167872	0.0980726		YPL249C-A	2.33849	5.40465e-230	2.03096e-228		YPL249C-A	2.01743	2.16877e-171	6.93408e-170		YPL249C-A	-0.071831	0.32068	0.732654		YPL249C-A	-0.392885	5.23268e-08	5.25885e-06
YPR169W-A	0.87578	1.70253e-05	0.00314969		YPR169W-A	4.63148	5.10192e-216	1.76795e-214		YPR169W-A	3.7557	5.80795e-158	1.6237e-156		YPR169W-A	0.00800363	0.948429	0.985155		YPR169W-A	-0.867776	8.06415e-08	7.92865e-06
YMR006C	-0.0143948	0.90239	0.999031		YMR006C	-0.209061	0.0121239	0.0154676		YMR006C	-0.194666	0.0185022	0.0238045		YMR006C	-0.424515	1.86192e-06	0.000272905		YMR006C	-0.41012	8.19264e-08	7.92865e-06
YDR524C-B	0.397125	5.03235e-05	0.0067708		YDR524C-B	2.53819	2.04764e-294	1.11789e-292		YDR524C-B	2.14106	1.73338e-209	7.21659e-208		YDR524C-B	0.0268249	0.69868	0.913459		YDR524C-B	-0.3703	8.86506e-08	8.42342e-06
YNL302C	0.273803	0.00250975	0.136875		YNL302C	1.72939	1.07741e-160	2.56583e-159		YNL302C	1.45559	3.7727e-114	7.30187e-113		YNL302C	-0.0650181	0.311623	0.723635		YNL302C	-0.338821	1.12515e-07	1.05001e-05
YDR450W	0.271951	0.00652435	0.23905		YDR450W	2.2931	5.15518e-231	1.9627e-229		YDR450W	2.02115	1.24889e-179	4.30197e-178		YDR450W	-0.101288	0.152369	0.547642		YDR450W	-0.373239	1.25288e-07	1.14869e-05
YJL136C	0.276727	0.00546874	0.214878		YJL136C	1.11312	2.47745e-56	1.67684e-55		YJL136C	0.83639	1.77798e-32	8.22475e-32		YJL136C	-0.0927074	0.190872	0.60724		YJL136C	-0.369434	1.30459e-07	1.17548e-05
YNL178W	0.264628	0.00354966	0.167665		YNL178W	1.43158	2.72181e-110	4.10186e-109		YNL178W	1.16695	7.84084e-74	9.02087e-73		YNL178W	-0.0715104	0.266177	0.685539		YNL178W	-0.336138	1.53156e-07	1.3566e-05
YDL171C	0.00190647	0.984185	0.9991		YDL171C	-1.28461	1.65614e-79	1.6668e-78		YDL171C	-1.28652	6.88955e-80	8.74338e-79		YDL171C	-0.343994	8.89249e-07	0.000145979		YDL171C	-0.345901	1.57051e-07	1.3651e-05
YEL017C-A	1.33983	6.05363e-08	3.35977e-05		YEL017C-A	8.59607	0	0		YEL017C-A	7.25624	0	0		YEL017C-A	0.129954	0.143438	0.533472		YEL017C-A	-1.20988	1.5934e-07	1.3651e-05
YIL069C	0.303882	0.0026707	0.142866		YIL069C	3.58456	0	0		YIL069C	3.28067	0	0		YIL069C	-0.0723428	0.308939	0.72183		YIL069C	-0.376225	1.7307e-07	1.45881e-05
YKL023C-A	0.396017	0.0988877	0.865372		YKL023C-A	-2.09311	5.44915e-36	2.38174e-35		YKL023C-A	-2.48913	2.38468e-47	1.62737e-46		YKL023C-A	-0.148935	0.490409	0.825885		YKL023C-A	-0.544953	1.9103e-07	1.58464e-05
YMR250W	0.155631	0.486196	0.999031		YMR250W	-0.414821	0.00397062	0.00530792		YMR250W	-0.570452	0.000844258	0.00123035		YMR250W	0.807573	1.18598e-05	0.00124802		YMR250W	0.651942	2.45067e-07	2.00112e-05
YOL059W	0.123586	0.229656	0.982177		YOL059W	0.961192	5.82328e-40	2.79895e-39		YOL059W	0.837606	1.35111e-30	5.90548e-30		YOL059W	-0.234618	0.00188542	0.0522823		YOL059W	-0.358203	2.97386e-07	2.39098e-05
YMR219W	-0.115215	0.383962	0.999031		YMR219W	0.0208752	0.818093	0.835269		YMR219W	0.13609	0.157634	0.182409		YMR219W	0.316439	0.00185631	0.0518252		YMR219W	0.431654	3.47259e-07	2.74966e-05
YMR246W	0.109577	0.229249	0.982177		YMR246W	0.434681	1.44647e-11	3.06284e-11		YMR246W	0.325104	4.69147e-07	8.50815e-07		YMR246W	-0.208593	0.00159942	0.0471056		YMR246W	-0.318169	3.97327e-07	3.09915e-05
YGL037C	0.112506	0.389593	0.999031		YGL037C	0.0421617	0.641436	0.668706		YGL037C	-0.0703447	0.455963	0.489729		YGL037C	0.55632	9.66707e-09	3.30614e-06		YGL037C	0.443813	4.20722e-07	3.23337e-05
YOL140W	-0.0945439	0.606346	0.999031		YOL140W	0.149638	0.257403	0.28498		YOL140W	0.244182	0.0550967	0.067409		YOL140W	-0.675815	1.98677e-06	0.000281163		YOL140W	-0.581271	5.44195e-07	4.12169e-05
YOL039W	0.319541	0.00188611	0.107363		YOL039W	2.58562	1.97746e-277	9.30371e-276		YOL039W	2.26607	6.68004e-213	2.84245e-211		YOL039W	-0.0440405	0.544737	0.848088		YOL039W	-0.363581	5.70498e-07	4.25917e-05
YGR271W	-0.226378	0.0859887	0.838129		YGR271W	-1.38498	3.60225e-53	2.30345e-52		YGR271W	-1.15861	1.89893e-33	9.07441e-33		YGR271W	0.152595	0.156867	0.549402		YGR271W	0.378973	6.0086e-07	4.42267e-05
YGL222C	0.165115	0.218615	0.982177		YGL222C	0.0766089	0.395968	0.426478		YGL222C	-0.0885064	0.372967	0.406777		YGL222C	0.580903	3.31609e-08	9.07284e-06		YGL222C	0.415788	6.17108e-07	4.47918e-05
YNL145W	2.31501	1.2014e-07	5.92692e-05		YNL145W	8.80541	7.80769e-122	1.34074e-120		YNL145W	6.49041	2.90499e-183	1.01886e-181		YNL145W	0.211676	0.0621757	0.375801		YNL145W	-2.10333	6.36195e-07	4.55446e-05
YOR133W	0.0699757	0.411229	0.999031		YOR133W	-0.0220195	0.714585	0.738447		YOR133W	-0.0919952	0.126587	0.148442		YOR133W	-0.227506	0.000161861	0.0108898		YOR133W	-0.297481	7.47839e-07	5.28136e-05
YDR385W	0.0696543	0.41498	0.999031		YDR385W	-0.0248471	0.680885	0.70665		YDR385W	-0.0945014	0.117828	0.138592		YDR385W	-0.227781	0.000167296	0.0108981		YDR385W	-0.297435	8.19458e-07	5.70998e-05
YHR021C	0.231249	0.0190469	0.433683		YHR021C	1.05608	7.17299e-52	4.48758e-51		YHR021C	0.824833	3.13316e-32	1.43902e-31		YHR021C	-0.109085	0.120217	0.498812		YHR021C	-0.340333	8.98806e-07	6.18047e-05
YDL182W	0.0794422	0.439241	0.999031		YDL182W	1.55784	3.85163e-102	5.26936e-101		YDL182W	1.47839	4.73071e-92	7.11081e-91		YDL182W	-0.271631	0.000220927	0.0137377		YDL182W	-0.351073	9.76683e-07	6.62876e-05
YBR249C	0.141901	0.113348	0.889162		YBR249C	0.904934	2.49696e-46	1.38808e-45		YBR249C	0.763033	2.44284e-33	1.16352e-32		YBR249C	-0.16392	0.0104078	0.157953		YBR249C	-0.305821	1.09843e-06	7.35949e-05
YDL121C	0.250392	0.10378	0.882728		YDL121C	2.0769	8.89691e-81	9.16128e-80		YDL121C	1.8265	1.59019e-63	1.51356e-62		YDL121C	-0.261031	0.0200598	0.220761		YDL121C	-0.511422	1.19261e-06	7.88937e-05
YJL190C	0.175083	0.105105	0.882851		YJL190C	2.75689	2.71701e-285	1.40387e-283		YJL190C	2.58181	2.77608e-250	1.46047e-248		YJL190C	-0.190858	0.0124036	0.175649		YJL190C	-0.365941	1.69919e-06	0.000111
YDR150W	-0.186338	0.143025	0.927907		YDR150W	-0.174606	0.050509	0.0610017		YDR150W	0.0117319	0.89701	0.908152		YDR150W	0.230904	0.0124132	0.175649		YDR150W	0.417242	1.85866e-06	0.000119918
YFR015C	0.155284	0.50279	0.999031		YFR015C	0.160931	0.295339	0.324067		YFR015C	0.00564699	0.974013	0.976882		YFR015C	0.845028	2.92217e-06	0.000399753		YFR015C	0.689744	1.98738e-06	0.000126659
YML078W	0.40718	0.000368047	0.0333495		YML078W	3.87742	0	0		YML078W	3.47024	0	0		YML078W	0.00495901	0.948379	0.985155		YML078W	-0.402221	2.13578e-06	0.000131313
YKR091W	-0.279763	0.0781536	0.831223		YKR091W	-0.0808426	0.455824	0.486599		YKR091W	0.198921	0.086566	0.103333		YKR091W	0.181381	0.148509	0.540799		YKR091W	0.461144	2.13451e-06	0.000131313
YHR072W-A	0.54849	5.85607e-05	0.00764734		YHR072W-A	2.51294	2.2444e-151	4.91983e-150		YHR072W-A	1.96445	5.95275e-91	8.74329e-90		YHR072W-A	0.0943972	0.331763	0.742385		YHR072W-A	-0.454093	2.11654e-06	0.000131313
YLR344W	0.260732	0.0065685	0.23905		YLR344W	2.25836	1.10788e-243	4.48343e-242		YLR344W	1.99762	4.01941e-190	1.44474e-188		YLR344W	-0.0594864	0.381749	0.776947		YLR344W	-0.320219	2.20993e-06	0.000134292
YJR025C	0.323779	0.0178976	0.418238		YJR025C	2.68294	5.26969e-170	1.32016e-168		YJR025C	2.35916	4.83546e-131	1.10604e-129		YJR025C	-0.131979	0.170608	0.569125		YJR025C	-0.455758	2.66393e-06	0.000160019
YBR169C	-0.0844981	0.629802	0.999031		YBR169C	-0.1878	0.113235	0.131163		YBR169C	-0.103302	0.423683	0.457691		YBR169C	0.421638	0.00225844	0.0594144		YBR169C	0.506136	2.79796e-06	0.00016616
YNL141W	0.079732	0.5291	0.999031		YNL141W	0.327143	0.000262324	0.000384613		YNL141W	0.247411	0.00571775	0.00772196		YNL141W	-0.320692	0.000596871	0.0237821		YNL141W	-0.400424	2.87713e-06	0.000168942
YML022W	0.193167	0.0691839	0.797861		YML022W	1.74468	8.68953e-120	1.46181e-118		YML022W	1.55151	3.43053e-94	5.29399e-93		YML022W	-0.151376	0.0480806	0.333315		YML022W	-0.344543	2.95689e-06	0.000171697
YJL173C	0.328241	0.0191508	0.433825		YJL173C	2.00653	6.31722e-92	7.69637e-91		YJL173C	1.67829	7.4625e-64	7.16177e-63		YJL173C	-0.118816	0.244592	0.661267		YJL173C	-0.447057	3.17347e-06	0.000182248
YOL040C	0.238114	0.0102346	0.313378		YOL040C	1.38726	1.98494e-99	2.61659e-98		YOL040C	1.14914	1.04363e-68	1.09809e-67		YOL040C	-0.0652253	0.321076	0.732654		YOL040C	-0.303339	3.52013e-06	0.000199959
YDR210W	0.716135	6.43049e-06	0.00167949		YDR210W	2.52469	1.28998e-113	1.98013e-112		YDR210W	1.80856	1.23794e-57	1.05507e-56		YDR210W	0.20099	0.0761056	0.413692		YDR210W	-0.515145	3.57565e-06	0.000200928
YML091C	-0.0436327	0.771875	0.999031		YML091C	-1.05748	9.32312e-25	3.04819e-24		YML091C	-1.01385	2.59227e-20	8.35271e-20		YML091C	0.384081	0.00112976	0.0368831		YML091C	0.427713	4.732e-06	0.000263079
YJL005W	0.022239	0.861986	0.999031		YJL005W	-1.51175	5.68582e-68	4.69384e-67		YJL005W	-1.53399	7.05148e-60	6.26834e-59		YJL005W	0.362704	0.000463143	0.0208872		YJL005W	0.340465	5.72009e-06	0.000314665
YFR052C-A	-0.131551	0.668572	#N/A		YFR052C-A	-1.11069	3.27951e-08	5.99069e-08		YFR052C-A	-0.979138	2.52397e-05	4.12954e-05		YFR052C-A	0.639668	0.0121321	#N/A		YFR052C-A	0.771219	6.83524e-06	0.000372093
YIL053W	0.0915767	0.314087	0.999031		YIL053W	0.914432	6.69855e-46	3.68834e-45		YIL053W	0.822856	1.94249e-37	1.04472e-36		YIL053W	-0.195813	0.00248023	0.0632228		YIL053W	-0.28739	6.94464e-06	0.000374151
YPR163C	0.360385	0.00080114	0.0584845		YPR163C	2.21846	8.87962e-188	2.49448e-186		YPR163C	1.85808	1.38257e-131	3.20037e-130		YPR163C	0.0199051	0.794023	0.955932		YPR163C	-0.34048	7.04065e-06	0.000375453
YGR027C	0.318694	0.00376333	0.169387		YGR027C	3.24549	0	0		YGR027C	2.92679	0	0		YGR027C	-0.0289019	0.708994	0.91905		YGR027C	-0.347596	8.59043e-06	0.000453471
YKR095W	-0.225896	0.0753636	0.822067		YKR095W	0.423018	1.6177e-06	2.71983e-06		YKR095W	0.648914	1.26641e-12	3.04855e-12		YKR095W	0.148737	0.117175	0.495248		YKR095W	0.374633	9.06746e-06	0.000473866
YDL075W	0.353499	0.000186093	0.0192152		YDL075W	3.03602	0	0		YDL075W	2.68252	0	0		YDL075W	0.056864	0.393966	0.784746		YDL075W	-0.296635	9.71982e-06	0.000502929
YGR105W	0.53794	0.0015668	0.0952956		YGR105W	3.1709	1.71038e-153	3.77785e-152		YGR105W	2.63296	6.21233e-106	1.10959e-104		YGR105W	-0.00856083	0.941588	0.984973		YGR105W	-0.546501	9.90373e-06	0.00050742
YDL081C	0.252279	0.0164191	0.398366		YDL081C	2.7084	5.0477e-291	2.70472e-289		YDL081C	2.45612	5.6242e-239	2.73506e-237		YDL081C	-0.0759761	0.306386	0.718763		YDL081C	-0.328255	1.02672e-05	0.000520937
YPR035W	0.0741813	0.506478	0.999031		YPR035W	1.55909	8.12756e-87	9.18637e-86		YPR035W	1.48491	7.12371e-79	8.86557e-78		YPR035W	-0.270079	0.000667801	0.0258552		YPR035W	-0.34426	1.16799e-05	0.000586915
YLR406C	0.399437	9.02758e-06	0.0021096		YLR406C	1.10179	8.44271e-68	6.93021e-67		YLR406C	0.702353	4.37619e-28	1.78975e-27		YLR406C	0.126361	0.0513558	0.346802		YLR406C	-0.273075	1.19705e-05	0.000595787
YGR142W	-0.092405	0.626569	0.999031		YGR142W	0.892067	4.34477e-12	9.40636e-12		YGR142W	0.984472	1.73404e-12	4.1518e-12		YGR142W	0.452065	0.00161839	0.0471056		YGR142W	0.54447	1.22806e-05	0.000605456
YDR433W	0.418324	0.000803503	0.0584845		YDR433W	3.71812	0	0		YDR433W	3.2998	5.22621e-304	3.78051e-302		YDR433W	0.0177128	0.834328	0.961997		YDR433W	-0.400611	1.24613e-05	0.000608623
YOR290C	-0.198676	0.0936486	0.848571		YOR290C	-1.09463	2.19564e-40	1.06239e-39		YOR290C	-0.895955	8.23113e-26	3.14205e-25		YOR290C	0.129122	0.158335	0.551617		YOR290C	0.327798	1.33302e-05	0.000645033
YLR258W	-0.0131508	0.94841	0.999031		YLR258W	0.266314	0.0504934	0.0610017		YLR258W	0.279465	0.0640052	0.0775865		YLR258W	0.534398	0.000787123	0.0296363		YLR258W	0.547549	1.47406e-05	0.000706738
YPL079W	0.145043	0.108164	0.884702		YPL079W	2.30124	6.93621e-285	3.5522e-283		YPL079W	2.1562	9.55279e-250	4.93589e-248		YPL079W	-0.130393	0.0412956	0.307024		YPL079W	-0.275436	1.57049e-05	0.000746124
YOL086C	0.152876	0.121412	0.899518		YOL086C	1.37941	5.88257e-87	6.67499e-86		YOL086C	1.22653	3.97247e-69	4.20269e-68		YOL086C	-0.145702	0.036926	0.291931		YOL086C	-0.298579	1.86626e-05	0.000872248
YNL112W	0.0698029	0.576403	0.999031		YNL112W	0.491932	2.58209e-08	4.73016e-08		YNL112W	0.422129	1.77157e-06	3.10481e-06		YNL112W	-0.303663	0.000685297	0.0262846		YNL112W	-0.373466	1.86934e-05	0.000872248
YKL152C	0.193044	0.0399035	0.623844		YKL152C	1.53331	6.52376e-118	1.06347e-116		YKL152C	1.34027	1.76954e-90	2.58594e-89		YKL152C	-0.0903775	0.174175	0.573857		YKL152C	-0.283422	1.94481e-05	0.000899433
YPL211W	0.220458	0.0755484	0.822067		YPL211W	1.70921	3.55474e-85	3.92581e-84		YPL211W	1.48875	3.84037e-64	3.71643e-63		YPL211W	-0.142019	0.115576	0.49512		YPL211W	-0.362477	2.05519e-05	0.000933951
YPR158W	-0.125422	0.496458	0.999031		YPR158W	-0.539902	1.63778e-05	2.5917e-05		YPR158W	-0.41448	0.00219373	0.00309562		YPR158W	0.353747	0.0155124	0.190038		YPR158W	0.479168	2.03828e-05	0.000933951
YMR062C	0.138135	0.249829	0.986566		YMR062C	0.617707	3.09302e-13	7.03312e-13		YMR062C	0.479572	1.69899e-08	3.32932e-08		YMR062C	-0.208853	0.0177544	0.205251		YMR062C	-0.346988	2.08352e-05	0.000938662
YOR335C	0.0736728	0.389185	0.999031		YOR335C	0.456423	4.28798e-14	1.00831e-13		YOR335C	0.382751	2.60884e-10	5.63124e-10		YOR335C	-0.178857	0.00355886	0.0790937		YOR335C	-0.25253	2.27943e-05	0.00101815
YAL003W	0.248905	0.00633068	0.234235		YAL003W	1.98363	4.07549e-208	1.28879e-206		YAL003W	1.73472	2.49638e-159	7.11652e-158		YAL003W	-0.0233036	0.718118	0.922406		YAL003W	-0.272208	2.35211e-05	0.00104171
YOL121C	0.208587	0.0208437	0.445884		YOL121C	2.02277	7.65969e-221	2.78784e-219		YOL121C	1.81418	2.31643e-177	7.7937e-176		YOL121C	-0.0587798	0.358401	0.756668		YOL121C	-0.267367	2.66423e-05	0.00117002
YOR021C	0.17234	0.150905	0.941618		YOR021C	1.43819	6.5336e-65	5.13025e-64		YOR021C	1.26585	5.48597e-50	4.01865e-49		YOR021C	-0.169023	0.0550083	0.356134		YOR021C	-0.341363	2.78776e-05	0.00121407
YGL030W	0.293681	0.0105569	0.316708		YGL030W	2.53354	7.52442e-214	2.53162e-212		YGL030W	2.23986	2.76333e-167	8.50606e-166		YGL030W	-0.0458612	0.57234	0.859784		YGL030W	-0.339542	2.89456e-05	0.00122706
YGL026C	0.194424	0.0319709	0.546001		YGL026C	1.13614	1.33254e-70	1.15268e-69		YGL026C	0.941718	1.18313e-48	8.37014e-48		YGL026C	-0.0696616	0.28416	0.70378		YGL026C	-0.264086	2.88359e-05	0.00122706
YKL054C	0.0323059	0.73578	0.999031		YKL054C	0.875054	1.88477e-38	8.79611e-38		YKL054C	0.842748	2.29778e-35	1.1583e-34		YKL054C	0.313218	4.35942e-06	0.000559096		YKL054C	0.280912	2.91151e-05	0.00122706
YHR143W-A	0.207186	0.190738	0.977774		YHR143W-A	2.47482	6.99098e-108	1.02422e-106		YHR143W-A	2.26763	1.67045e-91	2.46604e-90		YHR143W-A	-0.25946	0.0209765	0.22357		YHR143W-A	-0.466646	2.86948e-05	0.00122706
YER019C-A	0.476624	0.0010836	0.0740185		YER019C-A	4.08838	0	0		YER019C-A	3.61175	3.22487e-268	1.82964e-266		YER019C-A	0.00574282	0.950471	0.985402		YER019C-A	-0.470881	2.98904e-05	0.00124966
YML117W	-0.2485	0.0327474	0.550752		YML117W	-0.905991	3.32066e-29	1.22011e-28		YML117W	-0.657491	4.3064e-15	1.14369e-14		YML117W	0.0518852	0.569282	0.857652		YML117W	0.300385	3.29116e-05	0.00136505
YDR155C	0.198849	0.0316033	0.546001		YDR155C	1.49225	2.50164e-115	3.91269e-114		YDR155C	1.2934	6.80541e-87	9.51278e-86		YDR155C	-0.0711548	0.278436	0.700185		YDR155C	-0.270004	3.43831e-05	0.00141485
YDR225W	0.191442	0.0443096	0.654962		YDR225W	1.48317	4.62391e-108	6.79152e-107		YDR225W	1.29173	9.79137e-82	1.28487e-80		YDR225W	-0.0829357	0.223485	0.639598		YDR225W	-0.274378	3.66994e-05	0.0014902
YNL259C	0.849407	0.000278373	0.0268691		YNL259C	2.67063	8.84612e-60	6.35143e-59		YNL259C	1.82123	8.80343e-28	3.55764e-27		YNL259C	0.178739	0.286801	#N/A		YNL259C	-0.670669	3.73549e-05	0.0014902
YHL015W	0.221249	0.0468083	0.674769		YHL015W	2.07685	1.3432e-153	2.97821e-152		YHL015W	1.8556	7.5655e-123	1.62757e-121		YHL015W	-0.102847	0.191786	0.608932		YHL015W	-0.324096	3.73123e-05	0.0014902
YHR023W	-0.201952	0.128437	0.915349		YHR023W	0.648585	1.21151e-12	2.69137e-12		YHR023W	0.850537	1.20058e-18	3.64138e-18		YHR023W	0.15283	0.131246	0.517896		YHR023W	0.354782	3.67926e-05	0.0014902
YDR382W	0.27223	0.00304734	0.152844		YDR382W	3.08895	0	0		YDR382W	2.81672	0	0		YDR382W	0.00377751	0.953421	0.986608		YDR382W	-0.268453	3.89961e-05	0.00154389
YNL175C	0.129675	0.24144	0.982177		YNL175C	2.07762	6.47359e-156	1.48074e-154		YNL175C	1.94794	4.37167e-136	1.04974e-134		YNL175C	-0.188004	0.0175056	0.202946		YNL175C	-0.317679	4.06961e-05	0.00159908
YHR039C-A	0.462739	0.00042689	0.0371645		YHR039C-A	4.77728	0	0		YHR039C-A	4.31454	0	0		YHR039C-A	0.0533222	0.531666	0.845492		YHR039C-A	-0.409417	4.18309e-05	0.0016314
YDR345C	0.0625443	0.620453	0.999031		YDR345C	-0.0259869	0.771061	0.792		YDR345C	-0.0885313	0.321536	0.35402		YDR345C	-0.29927	0.000913547	0.0323207		YDR345C	-0.361814	4.21774e-05	0.00163273
YOR192C-B	-0.380783	0.00425923	0.180105		YOR192C-B	-2.96232	6.48555e-218	2.30257e-216		YOR192C-B	-2.58153	1.06851e-164	3.18736e-163		YOR192C-B	-0.00440582	0.963339	0.990463		YOR192C-B	0.376377	4.74013e-05	0.00182146
YJL052W	0.0624587	0.502742	0.999031		YJL052W	5.09763	0	0		YJL052W	5.03517	0	0		YJL052W	-0.209378	0.00126174	0.0395381		YJL052W	-0.271836	4.77831e-05	0.00182273
YHR019C	0.122968	0.196925	0.982177		YHR019C	1.04824	1.16609e-54	7.62503e-54		YHR019C	0.925272	7.85213e-43	4.85992e-42		YHR019C	-0.146371	0.0312697	0.269602		YHR019C	-0.26934	5.53003e-05	0.00207913
YFL017W-A	1.06653	0.000126734	0.0137244		YFL017W-A	4.66589	1.97257e-117	3.17974e-116		YFL017W-A	3.59936	2.3171e-79	2.90239e-78		YFL017W-A	0.159487	0.330414	#N/A		YFL017W-A	-0.907039	5.50681e-05	0.00207913
YPL110C	-0.0556076	0.689375	0.999031		YPL110C	-0.0889165	0.35259	0.381962		YPL110C	-0.033309	0.741612	0.764738		YPL110C	0.303102	0.00455962	0.0939573		YPL110C	0.35871	5.6649e-05	0.00211463
YDR261W-B	-0.402257	0.00320817	0.156531		YDR261W-B	-2.31679	9.09549e-128	1.67097e-126		YDR261W-B	-1.91453	2.88852e-87	4.06712e-86		YDR261W-B	-0.0209513	0.830741	0.961997		YDR261W-B	0.381306	5.96846e-05	0.00221214
YBL087C	0.146903	0.0982145	0.865372		YBL087C	2.25673	4.29316e-283	2.17935e-281		YBL087C	2.10983	7.04531e-247	3.60807e-245		YBL087C	-0.1041	0.0979289	0.465701		YBL087C	-0.251004	6.3088e-05	0.00232182
YDL124W	0.0690347	0.525285	0.999031		YDL124W	0.230295	0.00218743	0.00299047		YDL124W	0.16126	0.0399143	0.0495654		YDL124W	0.356148	1.2536e-05	0.00125482		YDL124W	0.287113	6.44751e-05	0.00235627
YDR210W-B	-0.384307	0.00363865	0.169387		YDR210W-B	-2.37127	1.25713e-142	2.61691e-141		YDR210W-B	-1.98696	6.51308e-100	1.07998e-98		YDR210W-B	-0.018723	0.844035	0.962199		YDR210W-B	0.365584	6.70137e-05	0.00243204
YOR343W-B	-0.401267	0.00305267	0.152844		YOR343W-B	-2.47751	3.91117e-148	8.41411e-147		YOR343W-B	-2.07624	8.95213e-104	1.5282e-102		YOR343W-B	-0.0276426	0.777025	0.948977		YOR343W-B	0.373624	6.94339e-05	0.00247163
YJL130C	-0.0719663	0.441207	0.999031		YJL130C	-0.818271	3.23876e-35	1.39247e-34		YJL130C	-0.746305	1.37364e-29	5.87094e-29		YJL130C	-0.331388	7.34462e-07	0.000125593		YJL130C	-0.259422	6.95636e-05	0.00247163
YER060W	-0.198891	0.278571	0.999031		YER060W	-1.21029	7.83801e-20	2.23993e-19		YER060W	-1.0114	1.4656e-15	3.96699e-15		YER060W	-0.599916	9.23002e-05	0.00728461		YER060W	-0.401025	6.88809e-05	0.00247163
YER111C	-0.0158757	0.917976	0.999031		YER111C	-0.322948	0.00206912	0.00283542		YER111C	-0.307072	0.0065827	0.00881808		YER111C	0.361192	0.00296037	0.0702274		YER111C	0.377067	6.99964e-05	0.00247163
YDL131W	0.0229562	0.822328	0.999031		YDL131W	1.30358	8.53838e-73	7.59011e-72		YDL131W	1.28062	3.96653e-70	4.27454e-69		YDL131W	-0.259698	0.000394029	0.0192511		YDL131W	-0.282655	7.3357e-05	0.00257291
YMR241W	0.16001	0.114199	0.890571		YMR241W	1.7376	4.4485e-131	8.4129e-130		YMR241W	1.57759	1.26569e-106	2.28892e-105		YMR241W	-0.117378	0.108556	0.485151		YMR241W	-0.277388	7.54911e-05	0.00263011
YHR029C	0.0307334	0.834356	0.999031		YHR029C	0.475656	4.89029e-06	7.99665e-06		YHR029C	0.444922	1.79859e-05	2.97214e-05		YHR029C	-0.354406	0.00125847	0.0395381		YHR029C	-0.38514	7.93696e-05	0.00274692
YHL030W	-0.0326689	0.766651	0.999031		YHL030W	-0.142622	0.0605077	0.0723766		YHL030W	-0.109953	0.167504	0.192981		YHL030W	0.245111	0.00368283	0.0808253		YHL030W	0.27778	8.48451e-05	0.00291711
YOR343W-A	-0.414764	0.00131384	0.087863		YOR343W-A	-0.662653	3.18435e-13	7.23511e-13		YOR343W-A	-0.247889	0.00681637	0.00911633		YOR343W-A	-0.0663953	0.47898	0.819398		YOR343W-A	0.348368	8.5945e-05	0.00293561
YLR179C	0.083108	0.410345	0.999031		YLR179C	0.622204	2.49573e-18	6.80941e-18		YLR179C	0.539096	4.73143e-14	1.20355e-13		YLR179C	-0.189067	0.00988168	0.153655		YLR179C	-0.272176	8.83565e-05	0.00298853
YPL271W	0.616204	9.21669e-05	0.0113673		YPL271W	3.96662	5.61406e-280	2.80074e-278		YPL271W	3.35041	6.43328e-197	2.48196e-195		YPL271W	0.14803	0.14985	0.542792		YPL271W	-0.468174	8.86379e-05	0.00298853
YMR217W	-0.0333749	0.733847	0.999031		YMR217W	0.0343031	0.621113	0.649861		YMR217W	0.0676779	0.329572	0.362386		YMR217W	-0.301346	1.81736e-05	0.00173452		YMR217W	-0.267971	9.14978e-05	0.00306518
YBL036C	0.216372	0.109532	0.884702		YBL036C	1.86258	1.94117e-85	2.1479e-84		YBL036C	1.64621	9.50402e-66	9.43392e-65		YBL036C	-0.14212	0.151173	0.545658		YBL036C	-0.358492	9.88168e-05	0.00328928
YGR260W	0.100711	0.390049	0.999031		YGR260W	1.3727	4.08267e-62	3.04857e-61		YGR260W	1.27199	8.38133e-53	6.49301e-52		YGR260W	-0.205288	0.0180366	0.206466		YGR260W	-0.305999	0.000100943	0.00333879
YLR061W	0.224755	0.0232751	0.463415		YLR061W	1.15643	2.65296e-61	1.95078e-60		YLR061W	0.931673	2.54508e-40	1.46697e-39		YLR061W	-0.0463583	0.509642	0.835822		YLR061W	-0.271114	0.000102355	0.0033642
YOR192C-A	-0.324053	0.0101299	0.313378		YOR192C-A	-0.883838	2.30452e-23	7.2401e-23		YOR192C-A	-0.559785	3.94108e-10	8.41898e-10		YOR192C-A	0.0122383	0.893557	0.972861		YOR192C-A	0.336291	0.000104919	0.00342692
YOR045W	0.538307	0.000486468	0.0399984		YOR045W	3.25531	6.67794e-199	2.01277e-197		YOR045W	2.717	1.45058e-134	3.42633e-133		YOR045W	0.100693	0.337424	0.746807		YOR045W	-0.437615	0.000109613	0.003558
YDL160C	0.0657157	0.510018	0.999031		YDL160C	1.0314	8.18346e-50	4.91773e-49		YDL160C	0.965687	1.62036e-41	9.67701e-41		YDL160C	0.329394	5.8446e-06	0.000666284		YDL160C	0.263678	0.000113512	0.00366181
YDL185W	0.019608	0.838935	0.999031		YDL185W	0.330107	1.29525e-06	2.19426e-06		YDL185W	0.310499	5.34671e-06	9.15427e-06		YDL185W	-0.241728	0.000430639	0.0201007		YDL185W	-0.261336	0.000114953	0.00368554
YDL198C	0.1328	0.189483	0.977774		YDL198C	0.433428	1.16193e-09	2.26859e-09		YDL198C	0.300628	2.90576e-05	4.73014e-05		YDL198C	-0.127431	0.090595	0.447415		YDL198C	-0.260231	0.000119016	0.00373023
YPL245W	0.0685441	0.67836	0.999031		YPL245W	0.562388	1.57252e-06	2.64771e-06		YPL245W	0.493844	2.29195e-05	3.75738e-05		YPL245W	-0.327445	0.0113547	0.167325		YPL245W	-0.39599	0.000119018	0.00373023
YEL021W	0.296208	0.0234955	0.463644		YEL021W	1.83252	1.17961e-88	1.38747e-87		YEL021W	1.53631	3.74805e-61	3.42113e-60		YEL021W	-0.0482694	0.612652	0.8816		YEL021W	-0.344477	0.000118438	0.00373023
YCL025C	0.190956	0.110677	0.889162		YCL025C	0.318999	0.000154969	0.000230542		YCL025C	0.128044	0.131822	0.154143		YCL025C	-0.119718	0.175553	0.576615		YCL025C	-0.310674	0.000119202	0.00373023
YHR179W	0.12428	0.282859	0.999031		YHR179W	0.63316	9.75548e-15	2.35229e-14		YHR179W	0.50888	5.14029e-10	1.09404e-09		YHR179W	-0.186095	0.0243709	0.24635		YHR179W	-0.310375	0.000126934	0.00394856
YKL006W	0.217186	0.0249701	0.475826		YKL006W	2.26071	2.95025e-239	1.17746e-237		YKL006W	2.04353	3.32049e-195	1.25593e-193		YKL006W	-0.0447558	0.514082	0.836246		YKL006W	-0.261942	0.000128738	0.00398099
YHR020W	0.010047	0.914206	0.999031		YHR020W	1.23173	5.88015e-78	5.76753e-77		YHR020W	1.22168	1.57635e-76	1.88478e-75		YHR020W	-0.239936	0.000312129	0.0170797		YHR020W	-0.249983	0.000129759	0.00398893
YCR051W	0.130372	0.361328	0.999031		YCR051W	2.78685	1.00233e-167	2.50022e-166		YCR051W	2.65648	2.09435e-152	5.55963e-151		YCR051W	-0.260203	0.00907965	0.144573		YCR051W	-0.390575	0.000133185	0.00407032
YDL191W	0.279428	0.0120864	0.339643		YDL191W	1.77304	2.08295e-112	3.14727e-111		YDL191W	1.49361	3.50407e-80	4.46653e-79		YDL191W	-0.0201617	0.798241	0.955932		YDL191W	-0.29959	0.000137822	0.00414027
YPR170W-B	0.414894	0.00353497	0.167665		YPR170W-B	2.52636	2.61719e-141	5.37081e-140		YPR170W-B	2.11146	1.91665e-96	3.04716e-95		YPR170W-B	0.0335969	0.739713	0.932241		YPR170W-B	-0.381297	0.000137851	0.00414027
YBR261C	0.252913	0.0860342	0.838129		YBR261C	2.04819	9.37338e-87	1.05738e-85		YBR261C	1.79528	5.01347e-66	5.01087e-65		YBR261C	-0.134903	0.205648	0.624278		YBR261C	-0.387817	0.000137136	0.00414027
YDR074W	0.116267	0.350359	0.999031		YDR074W	-0.118332	0.168412	0.191473		YDR074W	-0.234598	0.00922203	0.012204		YDR074W	0.427166	5.51934e-06	0.000666217		YDR074W	0.310899	0.000139537	0.00416699
YLL040C	-0.0686813	0.535947	0.999031		YLL040C	-1.05249	2.73986e-42	1.38962e-41		YLL040C	-0.983806	5.01869e-35	2.50372e-34		YLL040C	0.206568	0.0139452	0.18387		YLL040C	0.275249	0.000146278	0.00432726
YML054C	0.376414	0.258048	#N/A		YML054C	0.0222431	0.914594	0.922565		YML054C	-0.354171	0.1736	0.19973		YML054C	1.08237	8.80916e-05	#N/A		YML054C	0.705959	0.00014656	0.00432726
YLR043C	0.159336	0.132331	0.916564		YLR043C	0.721773	3.98148e-22	1.2114e-21		YLR043C	0.562438	6.91784e-14	1.74972e-13		YLR043C	-0.115109	0.135509	0.520639		YLR043C	-0.274445	0.00015481	0.00451976
YBR089C-A	0.299615	0.032096	0.546001		YBR089C-A	2.28835	5.52006e-120	9.34052e-119		YBR089C-A	1.98874	5.74224e-89	8.20502e-88		YBR089C-A	-0.0690959	0.490632	0.825885		YBR089C-A	-0.368711	0.000154406	0.00451976
YBR155W	0.113885	0.410553	0.999031		YBR155W	1.45389	3.77353e-50	2.28664e-49		YBR155W	1.34	1.69808e-42	1.04097e-41		YBR155W	-0.237636	0.0204498	0.221525		YBR155W	-0.351521	0.00015599	0.00452892
YOR103C	0.376643	0.0516022	0.70243		YOR103C	2.49582	1.98859e-74	1.81513e-73		YOR103C	2.11918	4.87458e-54	3.90709e-53		YOR103C	-0.13775	0.316552	0.727923		YOR103C	-0.514392	0.000157462	0.00453066
YKL101W	-0.240917	0.0476186	0.676419		YKL101W	-0.837032	5.9376e-23	1.84637e-22		YKL101W	-0.596115	7.87121e-12	1.82203e-11		YKL101W	0.0571038	0.537399	0.845596		YKL101W	0.298021	0.000157784	0.00453066
YKL024C	0.224736	0.0478698	0.676886		YKL024C	0.69036	5.26525e-18	1.42317e-17		YKL024C	0.465625	8.28065e-09	1.6547e-08		YKL024C	-0.0633564	0.451604	0.809039		YKL024C	-0.288092	0.00015872	0.00453264
YGL067W	0.320794	0.0307236	0.542367		YGL067W	-0.12208	0.237239	0.264222		YGL067W	-0.442874	3.28984e-05	5.33286e-05		YGL067W	-0.0157546	0.894385	0.972861		YGL067W	-0.336549	0.000161962	0.00455575
YBL100W-B	-0.359088	0.00680418	0.244734		YBL100W-B	-2.33599	2.00586e-137	4.00272e-136		YBL100W-B	-1.9769	3.95015e-98	6.42121e-97		YBL100W-B	-0.0120845	0.899422	0.973168		YBL100W-B	0.347004	0.000162145	0.00455575
YBR106W	0.159949	0.0651325	0.771169		YBR106W	1.63034	1.57012e-156	3.60567e-155		YBR106W	1.47039	2.08221e-126	4.63451e-125		YBR106W	-0.0689021	0.266432	0.685539		YBR106W	-0.228851	0.000160555	0.00455575
YLR410W-B	-0.405171	0.00389309	0.171142		YLR410W-B	-2.57742	3.88558e-149	8.42168e-148		YLR410W-B	-2.17225	7.1685e-106	1.27643e-104		YLR410W-B	-0.0368703	0.714264	0.920036		YLR410W-B	0.3683	0.000165322	0.00462016
YKL060C	0.0967115	0.31504	0.999031		YKL060C	0.35234	2.2575e-07	3.96966e-07		YKL060C	0.255629	0.00017303	0.000265604		YKL060C	-0.159349	0.0193089	0.215923		YKL060C	-0.25606	0.000166809	0.00463694
YJL026W	0.102501	0.396018	0.999031		YJL026W	0.891754	1.50065e-25	5.0169e-25		YJL026W	0.789252	2.51359e-20	8.10823e-20		YJL026W	-0.215341	0.0124547	0.175649		YJL026W	-0.317842	0.000172331	0.00476508
YMR202W	0.131505	0.163961	0.951618		YMR202W	0.00241285	0.971113	0.973636		YMR202W	-0.129092	0.0539602	0.0660883		YMR202W	-0.111576	0.104854	0.48188		YMR202W	-0.243081	0.000174109	0.0047889
YBR010W	0.161109	0.0977888	0.865372		YBR010W	3.20764	0	0		YBR010W	3.04654	0	0		YBR010W	-0.0988957	0.147229	0.539647		YBR010W	-0.260004	0.000178378	0.00488064
YBR140C	-0.0903449	0.482671	0.999031		YBR140C	-2.57572	3.75813e-188	1.06089e-186		YBR140C	-2.48537	1.756e-154	4.77087e-153		YBR140C	0.181463	0.0877551	0.442573		YBR140C	0.271808	0.000179944	0.00489785
YJL205C	0.968945	0.00970642	#N/A		YJL205C	0.650347	0.011804	0.0150761		YJL205C	-0.318598	0.240466	0.270734		YJL205C	0.153961	0.613303	#N/A		YJL205C	-0.814984	0.000186347	0.00504584
YDR085C	-0.233308	0.337508	0.999031		YDR085C	-1.27823	4.02386e-15	9.81293e-15		YDR085C	-1.04493	7.49011e-09	1.49849e-08		YDR085C	0.233688	0.262488	#N/A		YDR085C	0.466995	0.000191953	0.00517085
YKR093W	-0.0167367	0.893186	0.999031		YKR093W	0.182607	0.0377318	0.0461149		YKR093W	0.199343	0.0241162	0.030639		YKR093W	0.308756	0.000514759	0.0222376		YKR093W	0.325492	0.000194898	0.00522328
YEL037C	0.191152	0.0429986	0.647165		YEL037C	1.72242	5.74068e-148	1.23042e-146		YEL037C	1.53127	2.65986e-115	5.21784e-114		YEL037C	-0.0530097	0.435351	0.804449		YEL037C	-0.244161	0.000197799	0.00527398
YBR221C	0.122418	0.194108	0.980401		YBR221C	0.53641	7.11197e-16	1.78246e-15		YBR221C	0.413992	5.8855e-10	1.24943e-09		YBR221C	-0.118552	0.0833128	0.431712		YBR221C	-0.24097	0.000201077	0.00533415
YJL079C	0.0763841	0.58801	0.999031		YJL079C	-0.252004	0.00867666	0.0112532		YJL079C	-0.328388	0.0014714	0.00210872		YJL079C	0.401715	0.000273612	0.0158156		YJL079C	0.325331	0.000208494	0.00550299
YDL217C	0.528382	0.0143012	0.367037		YDL217C	1.69031	6.93371e-29	2.52838e-28		YDL217C	1.16193	3.71841e-14	9.49203e-14		YDL217C	-0.0102286	0.948796	0.985155		YDL217C	-0.538611	0.000213169	0.0055424
YDR055W	0.0658225	0.499506	0.999031		YDR055W	0.402872	3.27633e-09	6.24922e-09		YDR055W	0.33705	1.3529e-06	2.38987e-06		YDR055W	0.311876	1.23222e-05	0.00125482		YDR055W	0.246053	0.000212059	0.0055424
YJR009C	0.0261299	0.755719	0.999031		YJR009C	1.23363	7.55127e-96	9.58316e-95		YJR009C	1.2075	6.9722e-92	1.04529e-90		YJR009C	-0.193626	0.00112275	0.0368831		YJR009C	-0.219756	0.000213029	0.0055424
YER028C	0.0799097	0.763375	#N/A		YER028C	-0.845204	8.87437e-06	1.4241e-05		YER028C	-0.925114	5.80407e-07	1.04669e-06		YER028C	-0.43706	0.0526549	#N/A		YER028C	-0.51697	0.000220483	0.00570419
RDN18-1_rRNA	0.258457	0.538745	0.999031		RDN18-1_rRNA	5.50705	2.72685e-72	2.40187e-71		RDN18-1_rRNA	5.24859	3.57498e-74	4.15429e-73		RDN18-1_rRNA	-0.93059	0.000563693	0.0229049		RDN18-1_rRNA	-1.18905	0.000226203	0.00576653
RDN18-2_rRNA	0.258457	0.538745	0.999031		RDN18-2_rRNA	5.50705	2.72685e-72	2.40187e-71		RDN18-2_rRNA	5.24859	3.57498e-74	4.15429e-73		RDN18-2_rRNA	-0.93059	0.000563693	0.0229049		RDN18-2_rRNA	-1.18905	0.000226203	0.00576653
YCL005W-A	0.783257	0.00166229	0.0980726		YCL005W-A	6.67911	7.41935e-288	3.86809e-286		YCL005W-A	5.89586	5.57978e-271	3.19705e-269		YCL005W-A	-0.0371405	0.740309	0.932544		YCL005W-A	-0.820397	0.000225829	0.00576653
YMR076C	-0.0769216	0.546969	0.999031		YMR076C	-0.43692	6.37297e-07	1.09275e-06		YMR076C	-0.359999	0.000104717	0.000163961		YMR076C	0.214483	0.032388	0.273499		YMR076C	0.291405	0.000230713	0.00585295
YMR173W	-0.0711602	0.463905	0.999031		YMR173W	2.02011	2.69468e-193	7.68184e-192		YMR173W	2.09127	3.6708e-200	1.43533e-198		YMR173W	0.179699	0.00929908	0.146782		YMR173W	0.250859	0.000240008	0.00605934
YDL003W	-0.202414	0.118989	0.896961		YDL003W	-0.105459	0.240527	0.267525		YDL003W	0.0969557	0.300878	0.332922		YDL003W	0.100277	0.316781	0.727923		YDL003W	0.302692	0.000247845	0.00622712
YOR273C	0.147623	0.463163	0.999031		YOR273C	-0.319221	0.0183225	0.0230455		YOR273C	-0.466844	0.0017194	0.00244777		YOR273C	0.599951	0.000154588	0.010877		YOR273C	0.452328	0.000260745	0.00646158
YLR419W	-0.226466	0.122439	0.900048		YLR419W	-0.478527	2.55312e-06	4.23471e-06		YLR419W	-0.252061	0.0169689	0.021939		YLR419W	0.116781	0.299413	0.714414		YLR419W	0.343248	0.000259652	0.00646158
YER110C	-0.0073007	0.937291	0.999031		YER110C	-0.345253	1.41063e-07	2.50408e-07		YER110C	-0.337952	2.62784e-07	4.83693e-07		YER110C	-0.243677	0.000247045	0.0144839		YER110C	-0.236377	0.000260886	0.00646158
YPR017C	0.815857	0.00163485	#N/A		YPR017C	2.10537	1.645e-31	6.42782e-31		YPR017C	1.28952	4.12768e-12	9.72196e-12		YPR017C	0.186778	0.33366	#N/A		YPR017C	-0.629079	0.000266548	0.00657066
YCL019W	-0.385787	0.00466956	0.19021		YCL019W	-2.88161	9.392e-197	2.78726e-195		YCL019W	-2.49582	2.59521e-147	6.6632e-146		YCL019W	-0.0401472	0.681263	0.907259		YCL019W	0.345639	0.000278297	0.00682808
YFL002W-A	-0.395409	0.00437705	0.183341		YFL002W-A	-2.91824	6.76556e-195	1.98743e-193		YFL002W-A	-2.52283	2.02097e-145	5.06292e-144		YFL002W-A	-0.0450103	0.650766	0.899346		YFL002W-A	0.350399	0.000294391	0.00718919
YBL100W-A	-0.322273	0.0114792	0.333123		YBL100W-A	-0.545241	1.25058e-09	2.43756e-09		YBL100W-A	-0.222968	0.0137806	0.0179493		YBL100W-A	-0.00491195	0.957655	0.988779		YBL100W-A	0.317361	0.000297463	0.00723042
YPR133W-A	0.724085	0.00630434	0.234235		YPR133W-A	5.61086	8.01577e-181	2.15755e-179		YPR133W-A	4.88678	2.07949e-164	6.17129e-163		YPR133W-A	-0.110825	0.394872	0.784916		YPR133W-A	-0.83491	0.000298858	0.0072307
YBL072C	0.175665	0.0681727	0.790305		YBL072C	1.28929	5.73405e-80	5.8318e-79		YBL072C	1.11362	4.57952e-60	4.07719e-59		YBL072C	-0.0697719	0.306414	0.718763		YBL072C	-0.245437	0.00030637	0.00737829
YDR028C	-0.15653	0.206454	0.982177		YDR028C	-0.125021	0.148104	0.169618		YDR028C	0.0315094	0.722591	0.747521		YDR028C	0.140698	0.127866	0.514862		YDR028C	0.297229	0.000316518	0.00758773
YJL143W	0.381354	0.0117793	0.337419		YJL143W	3.74716	2.94872e-270	1.34364e-268		YJL143W	3.36581	1.96314e-215	8.6723e-214		YJL143W	-0.0264552	0.792022	0.955932		YJL143W	-0.407809	0.000322805	0.00770309
YHR148W	0.0692358	0.603934	0.999031		YHR148W	1.35476	6.06136e-47	3.40885e-46		YHR148W	1.28552	4.6274e-42	2.80112e-41		YHR148W	-0.251282	0.0113752	0.167325		YHR148W	-0.320518	0.000326378	0.00775297
YBR214W	0.232585	0.140969	0.927907		YBR214W	0.303442	0.00451241	0.00600306		YBR214W	0.0708568	0.542607	0.574788		YBR214W	0.592364	1.20447e-06	0.000183079		YBR214W	0.359779	0.000337214	0.00797412
YBR145W	0.133664	0.541988	0.999031		YBR145W	0.957292	8.21862e-10	1.61498e-09		YBR145W	0.823628	9.02129e-08	1.69832e-07		YBR145W	-0.363057	0.032372	#N/A		YBR145W	-0.496721	0.000344209	0.00810287
YOR285W	0.393202	0.00132586	0.087863		YOR285W	2.00156	4.36519e-121	7.45173e-120		YOR285W	1.60836	3.4584e-75	4.06784e-74		YOR285W	0.093101	0.29606	0.711981		YOR285W	-0.300101	0.000355724	0.00821868
YLR017W	0.204133	0.099011	0.865372		YLR017W	0.480147	3.4174e-08	6.23275e-08		YLR017W	0.276015	0.00170731	0.00243235		YLR017W	-0.090754	0.324854	0.734546		YLR017W	-0.294887	0.000354082	0.00821868
YLR029C	0.296402	0.005733	0.220132		YLR029C	1.49845	6.80809e-87	7.71006e-86		YLR029C	1.20205	1.66225e-56	1.38211e-55		YLR029C	0.0257343	0.734796	0.930742		YLR029C	-0.270668	0.000353341	0.00821868
YML079W	0.425163	0.00252787	0.136875		YML079W	1.66583	1.69564e-64	1.32068e-63		YML079W	1.24067	8.75677e-35	4.33865e-34		YML079W	0.0869805	0.403613	0.788676		YML079W	-0.338183	0.000356992	0.00821868
YHR087W	0.182808	0.647022	#N/A		YHR087W	2.65339	3.16462e-27	1.1079e-26		YHR087W	2.47058	4.23665e-15	1.12621e-14		YHR087W	1.20076	1.73936e-05	#N/A		YHR087W	1.01795	0.000355606	0.00821868
YGR161W-B	-0.413988	0.00297996	0.152844		YGR161W-B	-2.92314	1.00855e-193	2.88936e-192		YGR161W-B	-2.50916	1.32805e-142	3.28436e-141		YGR161W-B	-0.0674758	0.49927	0.832001		YGR161W-B	0.346512	0.000366716	0.00831626
YLR155C	0.602798	0.02129	0.445884		YLR155C	-4.0816	1.02257e-127	1.84926e-126		YLR155C	-4.6844	3.18417e-122	6.70066e-121		YLR155C	0.297018	0.229667	0.644891		YLR155C	-0.30578	0.00037237	0.00831626
YLR157C	0.602798	0.02129	0.445884		YLR157C	-4.0816	1.02257e-127	1.84926e-126		YLR157C	-4.6844	3.18417e-122	6.70066e-121		YLR157C	0.297018	0.229667	0.644891		YLR157C	-0.30578	0.00037237	0.00831626
YLR158C	0.602798	0.02129	0.445884		YLR158C	-4.0816	1.02257e-127	1.84926e-126		YLR158C	-4.6844	3.18417e-122	6.70066e-121		YLR158C	0.297018	0.229667	0.644891		YLR158C	-0.30578	0.00037237	0.00831626
YLR160C	0.602798	0.02129	0.445884		YLR160C	-4.0816	1.02257e-127	1.84926e-126		YLR160C	-4.6844	3.18417e-122	6.70066e-121		YLR160C	0.297018	0.229667	0.644891		YLR160C	-0.30578	0.00037237	0.00831626
YJR070C	0.0909736	0.357981	0.999031		YJR070C	1.21623	7.44271e-68	6.11804e-67		YJR070C	1.12526	5.26881e-58	4.51713e-57		YJR070C	-0.155195	0.0285742	0.258301		YJR070C	-0.246169	0.000364626	0.00831626
YHR193C	0.136655	0.133635	0.916564		YHR193C	1.63606	1.46047e-142	3.0293e-141		YHR193C	1.4994	1.40685e-119	2.87682e-118		YHR193C	-0.0919077	0.155599	0.549402		YHR193C	-0.228563	0.000364519	0.00831626
YDR034C-D	-0.339372	0.0103273	0.313378		YDR034C-D	-2.91285	1.49321e-213	4.9662e-212		YDR034C-D	-2.57348	6.50381e-166	1.98092e-164		YDR034C-D	-0.0124292	0.896085	0.972861		YDR034C-D	0.326943	0.000376783	0.00837879
YFR019W	-0.0897183	0.551519	0.999031		YFR019W	-1.54961	3.90072e-51	2.39634e-50		YFR019W	-1.45989	3.06432e-40	1.7645e-39		YFR019W	0.223827	0.0668814	0.387138		YFR019W	0.313546	0.000378376	0.00837879
YLR438C-A	0.283759	0.0884403	0.838129		YLR438C-A	3.56557	2.61111e-201	7.95288e-200		YLR438C-A	3.28181	6.62282e-171	2.10584e-169		YLR438C-A	-0.159971	0.146532	0.538781		YLR438C-A	-0.443731	0.000381498	0.00841226
YDR418W	0.237089	0.00725504	0.249708		YDR418W	1.31198	3.44159e-98	4.47562e-97		YDR418W	1.07489	2.69764e-66	2.715e-65		YDR418W	0.0163854	0.793799	0.955932		YDR418W	-0.220704	0.000386996	0.00849766
YCL030C	0.0626075	0.58316	0.999031		YCL030C	0.346563	1.68757e-05	2.66902e-05		YCL030C	0.283956	0.000440596	0.000655289		YCL030C	-0.214151	0.010095	0.155772		YCL030C	-0.276758	0.000388739	0.00850022
YBR162W-A	0.670622	0.000739877	0.0556789		YBR162W-A	4.8523	7.4289e-257	3.16111e-255		YBR162W-A	4.18168	6.00929e-198	2.33394e-196		YBR162W-A	0.0936865	0.410673	0.788676		YBR162W-A	-0.576935	0.000396993	0.00864453
YHR082C	-0.248598	0.0595663	0.748961		YHR082C	-1.89217	1.83341e-95	2.31658e-94		YHR082C	-1.64357	1.16643e-66	1.18216e-65		YHR082C	0.0201453	0.851932	0.962932		YHR082C	0.268743	0.000399917	0.00867206
YBL052C	-0.504631	0.0397201	0.623171		YBL052C	-2.40189	1.47724e-45	8.04973e-45		YBL052C	-1.89726	1.0517e-26	4.11508e-26		YBL052C	-0.112587	0.607073	0.878476		YBL052C	0.392045	0.000401996	0.00868112
YPL242C	-0.239885	0.0600656	0.749133		YPL242C	-0.608959	5.26972e-12	1.13663e-11		YPL242C	-0.369074	6.14379e-05	9.7703e-05		YPL242C	0.0352144	0.72759	0.927626		YPL242C	0.2751	0.000407593	0.00875515
YFL008W	-0.12077	0.334519	0.999031		YFL008W	1.00005	3.43031e-31	1.32695e-30		YFL008W	1.12082	5.45345e-35	2.71593e-34		YFL008W	0.170849	0.0693999	0.392851		YFL008W	0.291618	0.000408775	0.00875515
YDR216W	0.798674	0.00147086	0.0927461		YDR216W	-1.51075	7.76008e-24	2.46474e-23		YDR216W	-2.30942	1.87316e-30	8.16265e-30		YDR216W	1.21678	3.9149e-08	1.00417e-05		YDR216W	0.418106	0.000414773	0.00884167
YPR055W	-0.242465	0.0890551	0.838129		YPR055W	-0.703371	7.99243e-13	1.79481e-12		YPR055W	-0.460906	8.24546e-06	1.39481e-05		YPR055W	0.0554168	0.629692	0.886841		YPR055W	0.297882	0.000416198	0.00884167
YKL009W	0.0850781	0.404578	0.999031		YKL009W	1.54621	1.38921e-102	1.90958e-101		YKL009W	1.46113	1.97912e-90	2.87768e-89		YKL009W	-0.16271	0.0280368	0.257631		YKL009W	-0.247788	0.000419024	0.00886567
YKR094C	0.237811	0.0125921	0.349432		YKR094C	2.09768	5.08165e-213	1.66144e-211		YKR094C	1.85986	2.26076e-167	6.99628e-166		YKR094C	0.000644429	0.992383	0.997079		YKR094C	-0.237167	0.000424013	0.00893506
YKL056C	0.087233	0.322355	0.999031		YKL056C	0.781405	4.27096e-36	1.87101e-35		YKL056C	0.694172	8.92449e-29	3.71554e-28		YKL056C	-0.131114	0.0364501	0.289906		YKL056C	-0.218347	0.000426732	0.00895623
YEL027W	0.225343	0.0505454	0.699192		YEL027W	2.37475	3.70148e-187	1.02002e-185		YEL027W	2.14941	6.21486e-153	1.65739e-151		YEL027W	-0.0611957	0.453283	0.810449		YEL027W	-0.286539	0.000430156	0.00899197
YHR005C-A	0.348962	0.00444369	0.184392		YHR005C-A	1.3732	1.75767e-57	1.20803e-56		YHR005C-A	1.02423	1.26611e-31	5.73317e-31		YHR005C-A	0.0561992	0.533016	0.845596		YHR005C-A	-0.292763	0.000432663	0.00900835
YGL234W	0.0123591	0.898739	0.999031		YGL234W	0.444544	9.17895e-11	1.88564e-10		YGL234W	0.432185	3.24271e-10	6.95794e-10		YGL234W	-0.224207	0.0013765	0.0424748		YGL234W	-0.236566	0.000434807	0.00901707
YPL252C	0.0705075	0.591553	0.999031		YPL252C	-0.0371297	0.688111	0.713382		YPL252C	-0.107637	0.248787	0.279126		YPL252C	-0.216368	0.0356683	0.285494		YPL252C	-0.286876	0.00043806	0.00904862
YMR173W-A	-0.067846	0.492291	0.999031		YMR173W-A	1.99538	1.61413e-182	4.38542e-181		YMR173W-A	2.06322	1.86365e-188	6.65736e-187		YMR173W-A	0.174359	0.0131386	0.179139		YMR173W-A	0.242205	0.000484928	0.0099773
YDL066W	-0.0192317	0.835613	0.999031		YDL066W	0.185533	0.00460068	0.00611487		YDL066W	0.204765	0.00179846	0.00255529		YDL066W	-0.242031	0.000309123	0.0170797		YDL066W	-0.222799	0.000492913	0.0101018
YMR142C	0.236443	0.0253105	0.480251		YMR142C	2.36945	9.95799e-221	3.60168e-219		YMR142C	2.13301	6.53536e-179	2.22471e-177		YMR142C	-0.0234276	0.754083	0.939513		YMR142C	-0.259871	0.000504896	0.010307
YDR320C-A	0.57526	0.0242235	#N/A		YDR320C-A	2.08822	2.61603e-31	1.01672e-30		YDR320C-A	1.51296	7.92574e-17	2.23629e-16		YDR320C-A	-0.0214873	0.909465	#N/A		YDR320C-A	-0.596748	0.000507003	0.0103097
YIR034C	-0.0736665	0.531017	0.999031		YIR034C	0.665425	1.25996e-15	3.11997e-15		YIR034C	0.739092	5.9341e-19	1.82082e-18		YIR034C	-0.347943	6.5628e-05	0.00561119		YIR034C	-0.274277	0.000510772	0.0103461
YGR170W	-0.195329	0.279046	0.999031		YGR170W	-2.12486	1.94606e-67	1.58172e-66		YGR170W	-1.92953	5.097e-48	3.5495e-47		YGR170W	0.118684	0.446755	0.808771		YGR170W	0.314013	0.000536573	0.0108268
YPL240C	-0.193434	0.157579	0.951618		YPL240C	2.38249	3.76325e-134	7.25931e-133		YPL240C	2.57593	1.11999e-155	3.07174e-154		YPL240C	0.14146	0.143777	0.533472		YPL240C	0.334894	0.00054077	0.0108445
YKR016W	-0.223098	0.0638384	0.771169		YKR016W	0.733819	1.38561e-18	3.80386e-18		YKR016W	0.956918	2.93427e-28	1.20687e-27		YKR016W	0.0505731	0.577256	0.861151		YKR016W	0.273671	0.000541601	0.0108445
YGL097W	0.132027	0.215436	0.982177		YGL097W	0.744893	2.45138e-23	7.69312e-23		YGL097W	0.612866	6.65714e-16	1.82755e-15		YGL097W	-0.110899	0.16539	0.55911		YGL097W	-0.242926	0.000567596	0.0112314
YML103C	-0.179304	0.101367	0.875619		YML103C	-1.07276	4.02526e-45	2.1669e-44		YML103C	-0.893461	6.68975e-30	2.88262e-29		YML103C	0.0577936	0.497357	0.831427		YML103C	0.237098	0.000563298	0.0112314
YBR256C	0.149096	0.308562	0.999031		YBR256C	0.19531	0.0578751	0.0693854		YBR256C	0.0462147	0.657068	0.685127		YBR256C	-0.172497	0.126292	0.512386		YBR256C	-0.321592	0.000569524	0.0112314
YAL036C	0.19201	0.0846465	0.838129		YAL036C	1.42963	2.19679e-74	2.00202e-73		YAL036C	1.23762	3.79549e-55	3.08924e-54		YAL036C	-0.0718815	0.374096	0.770951		YAL036C	-0.263891	0.000565616	0.0112314
YER102W	0.172801	0.0760382	0.822067		YER102W	1.28405	1.27398e-77	1.23908e-76		YER102W	1.11125	1.56156e-58	1.34475e-57		YER102W	-0.0635229	0.357144	0.756255		YER102W	-0.236324	0.000588024	0.0115527
YJR063W	0.337832	0.0141105	0.366379		YJR063W	1.18583	6.37435e-35	2.70641e-34		YJR063W	0.848001	7.10303e-18	2.09614e-17		YJR063W	0.0257795	0.802624	0.956726		YJR063W	-0.312052	0.000617897	0.0120941
YPR036W-A	-0.131841	0.336547	0.999031		YPR036W-A	1.51614	2.13404e-56	1.44779e-55		YPR036W-A	1.64798	3.19686e-63	3.02291e-62		YPR036W-A	0.19413	0.0492191	0.338351		YPR036W-A	0.325971	0.000623269	0.0121538
YKR042W	0.0916778	0.403325	0.999031		YKR042W	1.53821	1.37314e-87	1.57666e-86		YKR042W	1.44653	1.54781e-77	1.88572e-76		YKR042W	-0.172648	0.0265634	0.254117		YKR042W	-0.264326	0.000627083	0.0121827
YDR120C	-0.0254132	0.841134	0.999031		YDR120C	-0.432382	1.41811e-06	2.39539e-06		YDR120C	-0.406969	5.62563e-06	9.60623e-06		YDR120C	-0.313658	0.000910542	0.0323207		YDR120C	-0.288245	0.000641963	0.0124255
YJR094W-A	0.219176	0.0219122	0.449997		YJR094W-A	2.63557	0	0		YJR094W-A	2.41639	4.3477e-278	2.56736e-276		YJR094W-A	-0.011741	0.861995	0.963777		YJR094W-A	-0.230917	0.000647581	0.012488
YGR130C	0.0218083	0.870826	0.999031		YGR130C	1.00828	5.18704e-27	1.80069e-26		YGR130C	0.986475	8.72569e-25	3.22243e-24		YGR130C	0.336732	0.00052924	0.022625		YGR130C	0.314924	0.000657411	0.012631
YLR327C	-0.207534	0.51613	#N/A		YLR327C	3.06563	2.77052e-49	1.64779e-48		YLR327C	3.27316	2.18084e-41	1.30108e-40		YLR327C	0.602253	0.00459844	#N/A		YLR327C	0.809787	0.000693711	0.0132796
YDR210W-A	-0.332551	0.00903576	0.288624		YDR210W-A	-0.396529	9.87358e-06	1.57885e-05		YDR210W-A	-0.0639776	0.479254	0.512746		YDR210W-A	-0.0358139	0.698273	0.913228		YDR210W-A	0.296737	0.000715111	0.0136393
YEL034W	0.155773	0.0887273	0.838129		YEL034W	1.09194	6.44296e-64	4.97139e-63		YEL034W	0.936169	2.07864e-47	1.42356e-46		YEL034W	-0.0618201	0.34023	0.748689		YEL034W	-0.217593	0.000756343	0.0143733
YER006W	0.116935	0.277426	0.999031		YER006W	0.418848	3.46932e-08	6.32344e-08		YER006W	0.301912	7.63253e-05	0.000120484		YER006W	-0.131695	0.0925448	0.451408		YER006W	-0.24863	0.000767604	0.0145344
YDL234C	-0.0413071	0.795514	0.999031		YDL234C	-0.6689	5.20748e-10	1.03417e-09		YDL234C	-0.627593	9.29959e-08	1.74957e-07		YDL234C	0.263378	0.0445727	0.318687		YDL234C	0.304685	0.000773312	0.0145896
YGR070W	0.438756	0.190213	0.977774		YGR070W	-2.90448	5.35132e-48	3.07834e-47		YGR070W	-3.34323	1.85186e-35	9.36776e-35		YGR070W	0.829977	0.00822502	#N/A		YGR070W	0.39122	0.000776575	0.0145915
YLR420W	0.0919732	0.411153	0.999031		YLR420W	0.426573	5.80172e-08	1.04692e-07		YLR420W	0.3346	2.64297e-05	4.31693e-05		YLR420W	-0.152118	0.0739371	0.40655		YLR420W	-0.244091	0.000778993	0.0145915
YOR294W	0.266689	0.0622059	0.767206		YOR294W	2.67195	4.97655e-155	1.12059e-153		YOR294W	2.40526	4.14873e-124	9.02582e-123		YOR294W	-0.0719752	0.475246	0.818542		YOR294W	-0.338665	0.00084177	0.0156781
YMR266W	0.0177762	0.87265	0.999031		YMR266W	-1.12479	7.85332e-47	4.40806e-46		YMR266W	-1.14257	6.47032e-48	4.48428e-47		YMR266W	-0.22719	0.00628757	0.112682		YMR266W	-0.244966	0.000843007	0.0156781
YER042W	0.30687	0.0391103	0.619882		YER042W	2.40352	7.66267e-117	1.22497e-115		YER042W	2.09665	1.81845e-87	2.57295e-86		YER042W	-0.0410837	0.698097	0.913228		YER042W	-0.347954	0.000863475	0.0158684
YHR094C	0.0832579	0.453844	0.999031		YHR094C	-0.262594	0.000807543	0.00113926		YHR094C	-0.345852	1.14319e-05	1.91647e-05		YHR094C	-0.166431	0.0425856	0.311535		YHR094C	-0.249688	0.000865386	0.0158684
YCL041C	0.741866	0.00164685	0.0980726		YCL041C	6.52436	0	0		YCL041C	5.78249	4.85548e-283	2.95775e-281		YCL041C	0.0382871	0.714486	0.920036		YCL041C	-0.703579	0.000863933	0.0158684
YFR009W-A	-0.526208	0.0169531	0.409084		YFR009W-A	-0.556672	0.000260234	0.000381646		YFR009W-A	-0.0304641	0.84821	0.864704		YFR009W-A	-0.10415	0.56359	#N/A		YFR009W-A	0.422059	0.000862294	0.0158684
YCL009C	0.17221	0.112815	0.889162		YCL009C	-0.744299	2.71659e-22	8.30477e-22		YCL009C	-0.91651	1.02772e-32	4.78472e-32		YCL009C	-0.0776971	0.321692	0.732654		YCL009C	-0.249908	0.00088293	0.0161335
YDL136W	0.236375	0.0310273	0.542367		YDL136W	1.84909	5.94886e-126	1.05279e-124		YDL136W	1.61271	4.4483e-96	7.03343e-95		YDL136W	-0.0205548	0.791177	0.955932		YDL136W	-0.25693	0.000897256	0.0162772
YPR052C	0.440671	0.00183942	0.106065		YPR052C	2.62994	2.02262e-154	4.53678e-153		YPR052C	2.18926	9.04708e-105	1.57697e-103		YPR052C	0.108774	0.277409	0.698887		YPR052C	-0.331897	0.000894878	0.0162772
YBR252W	0.284716	0.0307945	0.542367		YBR252W	2.46781	4.35083e-157	1.01118e-155		YBR252W	2.1831	2.76135e-119	5.60699e-118		YBR252W	-0.0230355	0.805877	0.957696		YBR252W	-0.307751	0.000900136	0.0162772
YFR031C-A	0.174072	0.0569703	0.741783		YFR031C-A	1.53679	5.94928e-125	1.04329e-123		YFR031C-A	1.36272	1.63115e-98	2.66652e-97		YFR031C-A	-0.0401688	0.535141	0.845596		YFR031C-A	-0.214241	0.000904062	0.0162918
YLR449W	0.0788233	0.494771	0.999031		YLR449W	0.918818	1.75193e-29	6.48235e-29		YLR449W	0.839994	9.45855e-25	3.48641e-24		YLR449W	-0.185595	0.0260925	0.252743		YLR449W	-0.264419	0.000923044	0.0165767
YLR363W-A	0.381657	0.0910305	0.841047		YLR363W-A	2.91681	3.64421e-74	3.31589e-73		YLR363W-A	2.53515	4.88997e-57	4.13113e-56		YLR363W-A	-0.158302	0.309297	#N/A		YLR363W-A	-0.53996	0.000963668	0.017247
YGR037C	0.20846	0.0276627	0.505442		YGR037C	2.42907	1.27516e-291	6.8966e-290		YGR037C	2.22061	1.3068e-238	6.30206e-237		YGR037C	-0.0109006	0.871011	0.964392		YGR037C	-0.219361	0.00101416	0.0180271
YKL043W	-0.213396	0.138351	0.926516		YKL043W	-2.39132	2.07581e-119	3.47188e-118		YKL043W	-2.17792	1.00657e-103	1.71324e-102		YKL043W	-0.49047	2.65256e-05	0.00241914		YKL043W	-0.277074	0.00101368	0.0180271
YDR454C	0.0339007	0.745236	0.999031		YDR454C	1.0851	3.56001e-49	2.11084e-48		YDR454C	1.0512	7.07002e-46	4.66524e-45		YDR454C	-0.20132	0.00776475	0.13168		YDR454C	-0.235221	0.00106597	0.0188201
YLR042C	-0.0246906	0.910038	0.999031		YLR042C	-0.187374	0.199255	0.224119		YLR042C	-0.162683	0.31711	0.349679		YLR042C	0.390972	0.0278983	#N/A		YLR042C	0.415663	0.00106498	0.0188201
YNR032C-A	0.59401	0.0226997	#N/A		YNR032C-A	2.30507	2.69266e-36	1.18678e-35		YNR032C-A	1.71106	2.81946e-20	9.07465e-20		YNR032C-A	0.00984616	0.958658	#N/A		YNR032C-A	-0.584164	0.00107122	0.0188492
YDR158W	0.116793	0.20791	0.982177		YDR158W	1.00726	2.19593e-53	1.41041e-52		YDR158W	0.890464	6.93693e-42	4.17732e-41		YDR158W	-0.0954665	0.149426	0.542213		YDR158W	-0.21226	0.00107816	0.0188908
YJL207C	-0.215966	0.0809901	0.835448		YJL207C	-1.58664	1.4735e-76	1.40249e-75		YJL207C	-1.37067	3.71112e-53	2.90219e-52		YJL207C	0.0206424	0.837081	0.961997		YJL207C	0.236608	0.00108082	0.0188908
YCR061W	-0.22001	0.0520423	0.70243		YCR061W	-0.916839	2.78042e-31	1.07916e-30		YCR061W	-0.69683	1.04676e-17	3.06248e-17		YCR061W	0.0109821	0.901148	0.973475		YCR061W	0.230992	0.00109692	0.0191084
YLR153C	0.0779686	0.429164	0.999031		YLR153C	0.0753556	0.279505	0.307508		YLR153C	-0.00261296	0.970131	0.974002		YLR153C	-0.147121	0.0366169	0.290669		YLR153C	-0.225089	0.00111776	0.0194068
YIL039W	0.138232	0.216312	0.982177		YIL039W	-0.0645147	0.4105	0.440818		YIL039W	-0.202747	0.0109816	0.0144335		YIL039W	-0.0945585	0.270872	0.690731		YIL039W	-0.232791	0.001146	0.0197656
YCR059C	0.349109	0.0434327	0.649914		YCR059C	0.778125	1.21169e-10	2.47251e-10		YCR059C	0.429016	0.000517891	0.000766701		YCR059C	-0.0144196	0.912924	0.976564		YCR059C	-0.363529	0.00114514	0.0197656
YBR218C	-0.0478929	0.639736	0.999031		YBR218C	-0.7812	3.28479e-27	1.1472e-26		YBR218C	-0.733307	4.11873e-24	1.48783e-23		YBR218C	-0.272392	0.000291038	0.0163942		YBR218C	-0.224499	0.0012182	0.0209418
YMR230W	0.208914	0.0940167	0.850172		YMR230W	2.49569	2.37596e-176	6.13824e-175		YMR230W	2.28678	6.34022e-148	1.66022e-146		YMR230W	-0.0761675	0.388018	0.781133		YMR230W	-0.285082	0.00122764	0.0210103
YAL039C	0.353627	0.0102029	0.313378		YAL039C	2.56863	1.12234e-156	2.59799e-155		YAL039C	2.21501	2.50915e-112	4.74524e-111		YAL039C	0.0398692	0.682885	0.907671		YAL039C	-0.313758	0.00123022	0.0210103
YDR025W	0.176886	0.0895122	0.838129		YDR025W	2.29705	1.15002e-213	3.84692e-212		YDR025W	2.12016	5.221e-182	1.82012e-180		YDR025W	-0.060882	0.408773	0.788676		YDR025W	-0.237768	0.00123983	0.0211055
YML026C	0.112043	0.25893	0.992666		YML026C	2.25419	1.06185e-226	3.96446e-225		YML026C	2.14215	2.43945e-204	9.94161e-203		YML026C	-0.114283	0.103778	0.478543		YML026C	-0.226326	0.00124511	0.0211117
YHR137W	0.126494	0.401615	0.999031		YHR137W	0.33976	0.00116745	0.00162955		YHR137W	0.213266	0.0495552	0.0609125		YHR137W	0.454208	4.64042e-05	0.00414006		YHR137W	0.327714	0.00124828	0.0211117
YIL090W	0.0650853	0.673099	0.999031		YIL090W	-0.961927	7.19928e-19	1.98865e-18		YIL090W	-1.02701	8.0662e-21	2.63426e-20		YIL090W	-0.215219	0.09133	0.448347		YIL090W	-0.280305	0.00125592	0.0211724
YGR286C	-0.128018	0.366582	0.999031		YGR286C	-0.184038	0.0676623	0.080618		YGR286C	-0.0560196	0.574563	0.606198		YGR286C	-0.415769	0.000160821	0.0108898		YGR286C	-0.287751	0.00126307	0.0212244
YGR177C	-0.111635	0.411808	0.999031		YGR177C	-0.625439	9.15116e-11	1.8806e-10		YGR177C	-0.513804	8.29868e-08	1.56636e-07		YGR177C	-0.382522	0.00034043	0.0174641		YGR177C	-0.270887	0.00130562	0.0218691
YER023W	0.151996	0.108835	0.884702		YER023W	1.40226	3.82688e-98	4.9655e-97		YER023W	1.25027	6.75358e-77	8.15928e-76		YER023W	-0.0577553	0.400213	0.787963		YER023W	-0.209751	0.00133143	0.0222303
YDR447C	0.241301	0.0196512	0.436258		YDR447C	3.37265	0	0		YDR447C	3.13135	0	0		YDR447C	0.00529107	0.941986	0.984973		YDR447C	-0.23601	0.00133598	0.0222351
YPR189W	-0.0116582	0.915586	0.999031		YPR189W	-0.140346	0.0655567	0.0782059		YPR189W	-0.128688	0.104639	0.123681		YPR189W	0.217363	0.0093437	0.146922		YPR189W	0.229022	0.00134719	0.0223318
YBR048W	0.119795	0.233595	0.982177		YBR048W	2.07734	9.5918e-188	2.68153e-186		YBR048W	1.95754	1.18013e-166	3.61346e-165		YBR048W	-0.107886	0.129655	0.514862		YBR048W	-0.227682	0.00135033	0.0223318
YGL133W	-0.194138	0.209669	0.982177		YGL133W	-1.00509	2.3788e-21	7.10325e-21		YGL133W	-0.81095	6.53407e-13	1.58677e-12		YGL133W	0.0837598	0.513318	0.836246		YGL133W	0.277898	0.00136305	0.0224709
YOR347C	-0.0822475	0.664134	0.999031		YOR347C	0.154831	0.227802	0.254153		YOR347C	0.237079	0.0887139	0.105701		YOR347C	0.288528	0.0541992	0.354814		YOR347C	0.370775	0.00137097	0.0225024
YLR249W	0.0367906	0.659116	0.999031		YLR249W	-0.0815492	0.166668	0.189677		YLR249W	-0.11834	0.0448082	0.0553243		YLR249W	-0.15155	0.0102911	0.157953		YLR249W	-0.18834	0.00138063	0.0225024
YPL143W	0.0796566	0.397657	0.999031		YPL143W	1.03498	1.55309e-54	1.01213e-53		YPL143W	0.955327	1.29161e-46	8.65113e-46		YPL143W	-0.132235	0.04818	0.333442		YPL143W	-0.211892	0.00138352	0.0225024
YPR058W	0.17054	0.207684	0.982177		YPR058W	0.0488338	0.606093	0.634949		YPR058W	-0.121706	0.208207	0.236253		YPR058W	-0.0980433	0.355786	0.756255		YPR058W	-0.268583	0.00137742	0.0225024
YML100W	0.186279	0.567871	0.999031		YML100W	-0.785045	0.000563505	0.000804193		YML100W	-0.971324	3.19233e-05	5.1806e-05		YML100W	0.903446	0.000135134	0.00990337		YML100W	0.717166	0.00139035	0.0225024
YNR050C	0.0202086	0.870673	0.999031		YNR050C	0.618742	1.71459e-12	3.78281e-12		YNR050C	0.598534	9.56807e-12	2.20424e-11		YNR050C	-0.252944	0.00496233	0.0979105		YNR050C	-0.273153	0.00139079	0.0225024
YGL123W	0.137499	0.119777	0.899216		YGL123W	0.88643	1.08223e-45	5.92514e-45		YGL123W	0.748931	4.54366e-33	2.14821e-32		YGL123W	-0.0616669	0.324821	0.734546		YGL123W	-0.199166	0.00140412	0.0225811
YPL250C	-0.191437	0.188625	0.977774		YPL250C	0.0963323	0.337008	0.366223		YPL250C	0.287769	0.0063944	0.00858371		YPL250C	0.10002	0.37808	0.774744		YPL250C	0.291457	0.00140429	0.0225811
YBL001C	0.287816	0.0564968	0.737859		YBL001C	1.46102	2.49124e-43	1.29764e-42		YBL001C	1.1732	1.05738e-27	4.25822e-27		YBL001C	-0.0371056	0.738909	0.932211		YBL001C	-0.324922	0.00142693	0.0228746
YKR065C	0.31069	0.0282676	0.508578		YKR065C	1.26369	4.86395e-37	2.17861e-36		YKR065C	0.953001	3.60695e-21	1.19619e-20		YKR065C	0.00552351	0.957699	0.988779		YKR065C	-0.305167	0.00147948	0.0236446
YDL125C	0.213819	0.0701676	0.800084		YDL125C	3.26751	0	0		YDL125C	3.05369	1.88411e-289	1.21148e-287		YDL125C	-0.0585879	0.470386	0.818542		YDL125C	-0.272407	0.00149129	0.0237607
YHR064C	0.00950529	0.917927	0.999031		YHR064C	0.328778	4.55541e-07	7.87165e-07		YHR064C	0.319273	1.00107e-06	1.78087e-06		YHR064C	-0.195162	0.00307644	0.0713317		YHR064C	-0.204667	0.00151061	0.0239952
YLR106C	-0.0438565	0.711658	0.999031		YLR106C	-2.02428	4.94318e-131	9.31797e-130		YLR106C	-1.98042	5.71926e-121	1.19485e-119		YLR106C	0.209002	0.017385	0.202693		YLR106C	0.252859	0.00151584	0.0240054
YLR310C	-0.106571	0.42162	0.999031		YLR310C	-1.48896	1.34881e-59	9.6365e-59		YLR310C	-1.38239	5.58633e-47	3.77224e-46		YLR310C	0.146917	0.164951	0.558547		YLR310C	0.253487	0.00152225	0.024034
YDR457W	-0.125306	0.28368	0.999031		YDR457W	-2.00276	2.17734e-133	4.15851e-132		YDR457W	-1.87745	3.42372e-111	6.39131e-110		YDR457W	0.111873	0.211986	0.626332		YDR457W	0.237179	0.00156772	0.0246151
YPR118W	0.0266638	0.817411	0.999031		YPR118W	-0.111238	0.171958	0.19516		YPR118W	-0.137902	0.0921807	0.10956		YPR118W	-0.214525	0.0133398	0.180567		YPR118W	-0.241189	0.00157272	0.0246151
YNL192W	-0.168	0.136556	0.91997		YNL192W	-0.345632	1.11874e-05	1.784e-05		YNL192W	-0.177632	0.0281025	0.0354389		YNL192W	0.0646391	0.44986	0.809039		YNL192W	0.232639	0.00157318	0.0246151
YDR002W	0.154786	0.174172	0.961848		YDR002W	1.72417	5.1878e-102	7.08061e-101		YDR002W	1.56938	2.82105e-84	3.82329e-83		YDR002W	-0.0976099	0.229121	0.644891		YDR002W	-0.252396	0.00158697	0.0247568
YGR271C-A	0.210818	0.186438	0.976319		YGR271C-A	1.96374	1.6277e-68	1.35338e-67		YGR271C-A	1.75292	6.65788e-54	5.3217e-53		YGR271C-A	-0.135521	0.241975	0.658095		YGR271C-A	-0.346339	0.00160212	0.0249186
YLR180W	0.0279354	0.784765	0.999031		YLR180W	1.14575	1.37262e-56	9.32316e-56		YLR180W	1.11781	8.09876e-54	6.4467e-53		YLR180W	-0.198093	0.00651691	0.115391		YLR180W	-0.226028	0.00165248	0.0256257
YML128C	0.701668	0.00423608	0.180105		YML128C	-0.0807336	0.600216	0.629021		YML128C	-0.782402	4.17593e-05	6.73713e-05		YML128C	1.13282	2.57973e-08	#N/A		YML128C	0.431151	0.00166112	0.0256835
YBR248C	0.0729944	0.513538	0.999031		YBR248C	0.747979	1.72964e-21	5.18087e-21		YBR248C	0.674985	1.93635e-17	5.60843e-17		YBR248C	-0.159007	0.0574646	0.362823		YBR248C	-0.232002	0.00171911	0.0265017
YMR291W	-0.0129471	0.933625	0.999031		YMR291W	-0.697375	4.39219e-11	9.14632e-11		YMR291W	-0.684428	1.85466e-09	3.8373e-09		YMR291W	0.276499	0.0269719	0.2559		YMR291W	0.289446	0.00173604	0.0265865
YBL098W	-0.147626	0.359971	0.999031		YBL098W	0.195081	0.0897321	0.105139		YBL098W	0.342707	0.00244159	0.00342367		YBL098W	-0.457313	0.000331293	0.0174641		YBL098W	-0.309687	0.00173433	0.0265865
YKL179C	-0.202578	0.15415	0.945093		YKL179C	0.958355	1.31569e-22	4.05945e-22		YKL179C	1.16093	1.88719e-29	8.04208e-29		YKL179C	0.0895954	0.403506	0.788676		YKL179C	0.292174	0.00173988	0.0265865
YDR019C	0.137191	0.329349	0.999031		YDR019C	0.402668	2.50327e-05	3.91843e-05		YDR019C	0.265478	0.0101075	0.013327		YDR019C	0.415284	0.000139767	0.0100632		YDR019C	0.278093	0.00174567	0.0265973
YJL157C	-0.0276815	0.807923	0.999031		YJL157C	-0.833823	2.38291e-26	8.10693e-26		YJL157C	-0.806141	1.44858e-22	5.00173e-22		YJL157C	0.192874	0.031002	0.268933		YJL157C	0.220555	0.00175707	0.0266932
YIL018W	0.164302	0.0910005	0.841047		YIL018W	2.07906	4.42859e-201	1.34179e-199		YIL018W	1.91476	1.18909e-170	3.76025e-169		YIL018W	-0.0502326	0.465215	0.81815		YIL018W	-0.214535	0.00178956	0.0270588
YCL059C	0.130409	0.311048	0.999031		YCL059C	1.71915	4.15643e-80	4.25722e-79		YCL059C	1.58874	9.46464e-68	9.78069e-67		YCL059C	-0.14787	0.111458	0.489746		YCL059C	-0.278279	0.00179149	0.0270588
YDR354W	0.00802534	0.944239	0.999031		YDR354W	-0.103793	0.199003	0.223878		YDR354W	-0.111818	0.169843	0.195559		YDR354W	-0.219854	0.0129933	0.178342		YDR354W	-0.227879	0.00180319	0.0270789
YKL191W	-0.065729	0.61579	0.999031		YKL191W	-1.04112	2.81466e-29	1.0355e-28		YKL191W	-0.975387	5.69266e-26	2.1788e-25		YKL191W	-0.329673	0.00098096	0.0344091		YKL191W	-0.263944	0.00180064	0.0270789
YDR316W-A	-0.0424645	0.698663	0.999031		YDR316W-A	-2.17165	3.49972e-173	8.96144e-172		YDR316W-A	-2.12919	3.07519e-165	9.31736e-164		YDR316W-A	-0.25432	0.00315435	0.0719191		YDR316W-A	-0.211856	0.00180985	0.027101
YBR247C	0.0362885	0.759115	0.999031		YBR247C	0.546684	5.70931e-11	1.18635e-10		YBR247C	0.510396	1.18201e-09	2.46853e-09		YBR247C	-0.211313	0.0159503	0.191094		YBR247C	-0.247602	0.00183711	0.0273525
YHR099W	-0.0627674	0.534059	0.999031		YHR099W	-2.02503	8.32177e-182	2.25038e-180		YHR099W	-1.96226	3.67877e-162	1.06445e-160		YHR099W	0.141384	0.0655816	0.384908		YHR099W	0.204152	0.00183398	0.0273525
YMR290C	0.0842182	0.432523	0.999031		YMR290C	0.544237	6.44811e-13	1.45252e-12		YMR290C	0.460019	1.46451e-09	3.04751e-09		YMR290C	-0.145478	0.061923	0.374826		YMR290C	-0.229696	0.00184525	0.0273956
YOR369C	0.219019	0.0595106	0.748961		YOR369C	1.74255	7.29339e-100	9.70272e-99		YOR369C	1.52353	1.2035e-76	1.44495e-75		YOR369C	-0.0363007	0.659271	0.900048		YOR369C	-0.25532	0.00185752	0.0274997
YDR261W-A	-0.288325	0.0226758	0.453517		YDR261W-A	-0.459069	2.61369e-07	4.57237e-07		YDR261W-A	-0.170743	0.0571915	0.0697361		YDR261W-A	-0.0164215	0.857529	0.963777		YDR261W-A	0.271904	0.00186638	0.0275529
YER049W	0.0806437	0.431829	0.999031		YER049W	0.24003	0.000895867	0.00126141		YER049W	0.159386	0.0286055	0.0360496		YER049W	-0.134631	0.0751204	0.409966		YER049W	-0.215275	0.0018935	0.0278744
YGR234W	0.0816678	0.356083	0.999031		YGR234W	0.51153	2.87623e-16	7.32926e-16		YGR234W	0.429862	6.58611e-12	1.53376e-11		YGR234W	-0.111569	0.0758192	0.412682		YGR234W	-0.193237	0.00192713	0.0282898
YNL075W	0.0426533	0.775896	0.999031		YNL075W	3.00965	6.00096e-178	1.5643e-176		YNL075W	2.96699	3.88234e-172	1.24817e-170		YNL075W	-0.295782	0.00386704	0.0830908		YNL075W	-0.338436	0.00197602	0.0289262
YBL071W-A	0.347169	0.0811264	0.835448		YBL071W-A	2.56541	4.83537e-75	4.49876e-74		YBL071W-A	2.21824	2.27567e-55	1.85744e-54		YBL071W-A	-0.0867196	0.539087	0.845723		YBL071W-A	-0.433888	0.00198362	0.0289565
YGR159C	0.0846046	0.487737	0.999031		YGR159C	0.958058	1.01908e-28	3.69745e-28		YGR159C	0.873453	4.23871e-24	1.52831e-23		YGR159C	-0.17989	0.038128	0.292481		YGR159C	-0.264495	0.00201823	0.0293243
YKL163W	-0.641086	0.0162894	0.397389		YKL163W	8.13849	0	0		YKL163W	8.77957	0	0		YKL163W	0.126068	0.195044	0.610156		YKL163W	0.767155	0.00202005	0.0293243
YLR294C	-0.137447	0.90131	0.999031		YLR294C	-8.88974	1.88429e-34	7.91896e-34		YLR294C	-8.7523	1.41997e-25	5.37786e-25		YLR294C	0.127287	0.908297	0.974827		YLR294C	0.264729	0.00206235	0.0298555
YIL009W	-0.0777581	0.571604	0.999031		YIL009W	-0.610607	3.51854e-10	7.03343e-10		YIL009W	-0.532849	4.03462e-08	7.74406e-08		YIL009W	-0.333058	0.00237012	0.061176		YIL009W	-0.2553	0.00209525	0.0302479
YIL094C	0.0988654	0.396547	0.999031		YIL094C	0.354642	1.59878e-05	2.53136e-05		YIL094C	0.255776	0.00198766	0.00281375		YIL094C	-0.144684	0.0909852	0.448263		YIL094C	-0.24355	0.00210163	0.0302565
YLR333C	0.234461	0.0319399	0.546001		YLR333C	1.90289	2.26031e-134	4.37472e-133		YLR333C	1.66843	5.76563e-103	9.75606e-102		YLR333C	-0.00109169	0.988789	0.995933		YLR333C	-0.235553	0.00218241	0.0313331
YDR384C	0.306337	0.0456433	0.666632		YDR384C	1.88187	1.07661e-68	8.99041e-68		YDR384C	1.57554	4.2765e-47	2.8979e-46		YDR384C	-0.0147602	0.894871	0.972861		YDR384C	-0.321097	0.00221747	0.0316625
YMR205C	-0.0400333	0.632569	0.999031		YMR205C	-0.31779	7.89429e-08	1.41745e-07		YMR205C	-0.277757	2.73973e-06	4.74979e-06		YMR205C	-0.219584	0.000236462	0.0140644		YMR205C	-0.179551	0.00221535	0.0316625
YNL255C	0.232178	0.0125537	0.349432		YNL255C	1.33721	1.22204e-92	1.4983e-91		YNL255C	1.10503	7.52407e-63	7.06847e-62		YNL255C	0.0348552	0.602089	0.876862		YNL255C	-0.197323	0.00227977	0.0324635
YLL010C	-0.153878	0.272262	0.999031		YLL010C	-0.297164	0.00205669	0.00281973		YLL010C	-0.143286	0.15896	0.183796		YLL010C	0.10585	0.341381	0.749324		YLL010C	0.259728	0.00231415	0.0328635
YBR126W-A	0.376522	0.0173484	0.411909		YBR126W-A	2.52413	2.45811e-115	3.85503e-114		YBR126W-A	2.14761	3.03894e-80	3.88219e-79		YBR126W-A	0.0382655	0.734062	0.930673		YBR126W-A	-0.338257	0.00234309	0.0331843
YBR090C	0.313179	0.163821	0.951618		YBR090C	5.04694	2.26135e-213	7.47796e-212		YBR090C	4.73376	7.69375e-202	3.0706e-200		YBR090C	-0.265081	0.0273889	0.256227		YBR090C	-0.57826	0.00235617	0.0331854
YER155C	-0.165723	0.132509	0.916564		YER155C	-1.78507	4.27841e-119	7.11469e-118		YER155C	-1.61934	1.03397e-93	1.58716e-92		YER155C	0.0490111	0.562141	0.855087		YER155C	0.214734	0.00236222	0.0331854
YHR089C	0.262741	0.0157411	0.388281		YHR089C	1.60228	3.13381e-97	4.01225e-96		YHR089C	1.33953	2.80501e-67	2.85785e-66		YHR089C	0.03264	0.676389	0.906741		YHR089C	-0.230101	0.00235216	0.0331854
YFL014W	0.69001	0.0355665	#N/A		YFL014W	3.29642	2.446e-60	1.77381e-59		YFL014W	2.60641	9.45415e-24	3.38141e-23		YFL014W	1.42142	1.93206e-10	#N/A		YFL014W	0.731412	0.00237416	0.0332637
YGL194C	-0.177232	0.306211	0.999031		YGL194C	-0.472289	6.59917e-05	0.000100393		YGL194C	-0.295057	0.019643	0.0251715		YGL194C	0.130518	0.352903	0.756255		YGL194C	0.30775	0.00238329	0.0333024
YLR244C	0.128166	0.220434	0.982177		YLR244C	0.911107	4.06333e-35	1.74052e-34		YLR244C	0.782941	5.20887e-26	1.99892e-25		YLR244C	-0.0900409	0.23579	0.64945		YLR244C	-0.218207	0.00241121	0.0334243
YKL096W	0.119955	0.2461	0.986566		YKL096W	1.72339	1.94162e-125	3.41525e-124		YKL096W	1.60344	2.29382e-104	3.9507e-103		YKL096W	0.338995	4.75475e-06	0.000591318		YKL096W	0.21904	0.00239947	0.0334243
YHR052W	0.0304384	0.768206	0.999031		YHR052W	1.68912	4.57022e-119	7.57819e-118		YHR052W	1.65868	1.58634e-113	3.04988e-112		YHR052W	-0.187219	0.0117493	0.170386		YHR052W	-0.217657	0.00240962	0.0334243
YOR036W	-0.241125	0.278419	0.999031		YOR036W	1.53626	1.21669e-24	3.96898e-24		YOR036W	1.77738	2.96384e-27	1.17962e-26		YOR036W	0.209412	0.206045	#N/A		YOR036W	0.450536	0.00242115	0.0334733
YJR104C	0.248054	0.011984	0.339643		YJR104C	2.79406	0	0		YJR104C	2.54601	7.2535e-290	4.77e-288		YJR104C	0.0360102	0.605143	0.877576		YJR104C	-0.212044	0.00243988	0.0336433
YMR083W	0.195343	0.0887621	0.838129		YMR083W	1.2592	1.26594e-54	8.26864e-54		YMR083W	1.06386	5.06238e-39	2.82235e-38		YMR083W	-0.0459962	0.577458	0.861151		YMR083W	-0.241339	0.00246967	0.0339645
YNL030W	0.239482	0.0234732	0.463644		YNL030W	3.93437	0	0		YNL030W	3.69489	0	0		YNL030W	0.00694886	0.923698	0.978791		YNL030W	-0.232533	0.00248571	0.0340061
YJL200C	-0.0291777	0.802026	0.999031		YJL200C	-0.795164	4.00366e-22	1.21751e-21		YJL200C	-0.765987	1.38975e-20	4.51317e-20		YJL200C	-0.266538	0.00192638	0.0527057		YJL200C	-0.23736	0.00248526	0.0340061
YER022W	-0.241472	0.1348	0.917965		YER022W	0.762207	6.23878e-12	1.34115e-11		YER022W	1.00368	1.22581e-17	3.57369e-17		YER022W	0.071221	0.56562	0.857393		YER022W	0.312693	0.00250971	0.0342448
YLR186W	0.128457	0.236205	0.982177		YLR186W	1.0844	5.53238e-46	3.05495e-45		YLR186W	0.955946	3.14985e-35	1.5782e-34		YLR186W	-0.0921047	0.250116	0.668143		YLR186W	-0.220562	0.00255771	0.0348089
YPL084W	-0.0832701	0.473984	0.999031		YPL084W	-0.490031	1.09006e-09	2.1297e-09		YPL084W	-0.406761	1.29708e-06	2.29406e-06		YPL084W	0.135648	0.134956	0.520639		YPL084W	0.218918	0.00261404	0.0354202
YPR110C	0.0684081	0.553419	0.999031		YPR110C	0.474824	5.5434e-09	1.04528e-08		YPR110C	0.406416	6.73952e-07	1.20823e-06		YPR110C	-0.1701	0.0426771	0.311612		YPR110C	-0.238508	0.00261618	0.0354202
YGR187C	0.0695077	0.589429	0.999031		YGR187C	1.51655	1.05024e-62	7.9137e-62		YGR187C	1.44704	1.91067e-56	1.58638e-55		YGR187C	-0.194996	0.0379852	0.291931		YGR187C	-0.264504	0.00267306	0.0360967
YLR147C	0.803867	0.0136907	0.358381		YLR147C	5.5289	6.28805e-117	1.008e-115		YLR147C	4.72503	3.60903e-102	6.07135e-101		YLR147C	-0.0436113	0.788913	#N/A		YLR147C	-0.847478	0.00269777	0.0362244
YER036C	0.075759	0.400038	0.999031		YER036C	0.249544	8.55532e-05	0.000129234		YER036C	0.173785	0.00644025	0.00864325		YER036C	-0.111271	0.0866705	0.441858		YER036C	-0.18703	0.00269629	0.0362244
YER167W	-0.129429	0.348578	0.999031		YER167W	-1.014	1.89953e-26	6.48531e-26		YER167W	-0.88457	8.64774e-19	2.6363e-18		YER167W	0.122106	0.26567	0.685299		YER167W	0.251535	0.00270332	0.0362244
YGR192C	0.0345473	0.698247	0.999031		YGR192C	0.125978	0.0455665	0.0553281		YGR192C	0.0914312	0.146785	0.170674		YGR192C	-0.154016	0.0145604	0.185808		YGR192C	-0.188564	0.00275335	0.0366133
YHR203C	0.106982	0.230616	0.982177		YHR203C	1.12003	1.57772e-70	1.35665e-69		YHR203C	1.01305	5.89033e-58	5.04251e-57		YHR203C	-0.0816098	0.196848	0.612949		YHR203C	-0.188592	0.00274584	0.0366133
YIL078W	0.06625	0.459652	0.999031		YIL078W	0.728676	1.11986e-30	4.26637e-30		YIL078W	0.662426	1.55464e-25	5.88019e-25		YIL078W	-0.121651	0.0571479	0.362704		YIL078W	-0.187901	0.00274907	0.0366133
YDR321W	0.0879698	0.388768	0.999031		YDR321W	0.375651	1.76092e-07	3.11253e-07		YDR321W	0.287681	7.12413e-05	0.000112674		YDR321W	-0.120035	0.108102	0.485151		YDR321W	-0.208005	0.00278372	0.0369232
YOL077C	0.0531739	0.611044	0.999031		YOL077C	0.209837	0.00438309	0.00583908		YOL077C	0.156663	0.034768	0.0434656		YOL077C	-0.156556	0.0434121	0.312503		YOL077C	-0.20973	0.0027971	0.0370067
YGR173W	0.122304	0.322984	0.999031		YGR173W	1.86544	5.6261e-102	7.66076e-101		YGR173W	1.74314	2.46729e-87	3.48249e-86		YGR173W	-0.132742	0.138381	0.523907		YGR173W	-0.255047	0.0028136	0.037131
YCL020W	-0.338807	0.00933516	0.293958		YCL020W	-1.77261	9.16111e-83	9.70977e-82		YCL020W	-1.43381	2.2768e-54	1.82998e-53		YCL020W	-0.0692235	0.461401	0.817259		YCL020W	0.269583	0.00283165	0.0372751
YER172C	-0.129016	0.275159	0.999031		YER172C	-0.675786	1.46311e-16	3.75977e-16		YER172C	-0.54677	1.48552e-10	3.2514e-10		YER172C	0.0886947	0.339859	0.748274		YER172C	0.217711	0.00289399	0.0379047
YFR001W	0.433345	0.0173157	0.411909		YFR001W	1.91634	9.28296e-51	5.6727e-50		YFR001W	1.48299	2.57845e-30	1.12023e-29		YFR001W	0.0583257	0.65752	0.900048		YFR001W	-0.37502	0.00289085	0.0379047
YML056C	-0.000172698	0.998566	0.999505		YML056C	0.0948274	0.162329	0.184957		YML056C	0.0950001	0.162464	0.187548		YML056C	-0.198727	0.00406982	0.0869924		YML056C	-0.198554	0.00290201	0.0379148
YPR069C	0.0624058	0.506518	0.999031		YPR069C	0.299462	6.21024e-06	1.0081e-05		YPR069C	0.237056	0.000371275	0.000556336		YPR069C	-0.129904	0.0567171	0.362565		YPR069C	-0.19231	0.00292845	0.0381648
YBL028C	0.852137	0.00101994	0.0707582		YBL028C	5.80475	3.8431e-210	1.22198e-208		YBL028C	4.95262	2.83045e-168	8.85396e-167		YBL028C	0.183358	0.156043	0.549402		YBL028C	-0.668779	0.0029433	0.0381845
YBR275C	-0.184264	0.195481	0.982177		YBR275C	-0.973226	3.15338e-23	9.86944e-23		YBR275C	-0.788963	2.09118e-14	5.39049e-14		YBR275C	0.0626204	0.588071	0.868054		YBR275C	0.246884	0.00294458	0.0381845
YPL220W	0.118486	0.275948	0.999031		YPL220W	2.46181	5.56193e-225	2.05012e-223		YPL220W	2.34333	7.96604e-204	3.22374e-202		YPL220W	-0.109982	0.152694	0.547775		YPL220W	-0.228468	0.00296782	0.0383906
YEL020W-A	0.375953	0.00278065	0.146977		YEL020W-A	2.47309	1.14467e-173	2.94409e-172		YEL020W-A	2.09714	7.98501e-121	1.65625e-119		YEL020W-A	0.113912	0.202533	0.621223		YEL020W-A	-0.262042	0.00302379	0.0390181
YDL161W	-0.165516	0.196224	0.982177		YDL161W	1.37379	2.4259e-54	1.57738e-53		YDL161W	1.5393	4.3668e-62	4.04331e-61		YDL161W	0.0900061	0.340962	0.749324		YDL161W	0.255522	0.0031087	0.0398303
YOR065W	-0.0836385	0.445045	0.999031		YOR065W	0.362067	2.18941e-06	3.65344e-06		YOR065W	0.445705	1.31031e-08	2.58621e-08		YOR065W	0.134152	0.0978379	0.465701		YOR065W	0.21779	0.00311232	0.0398303
YGL055W	0.0322555	0.703967	0.999031		YGL055W	0.0610794	0.308236	0.337258		YGL055W	0.0288239	0.631553	0.661373		YGL055W	-0.142081	0.0198321	0.220571		YGL055W	-0.174337	0.00314983	0.0398303
YGR200C	-0.0215559	0.847042	0.999031		YGR200C	-0.313767	6.79277e-05	0.000103229		YGR200C	-0.292211	0.000227529	0.00034632		YGR200C	-0.232922	0.00663055	0.11629		YGR200C	-0.211366	0.00315812	0.0398303
YLL026W	0.125413	0.639695	0.999031		YLL026W	0.847019	7.54475e-06	1.21654e-05		YLL026W	0.721606	0.000142559	0.000220349		YLL026W	0.683486	0.000318664	0.0172079		YLL026W	0.558072	0.00314921	0.0398303
YPR045C	-0.0294672	0.838576	0.999031		YPR045C	0.0732379	0.458154	0.488635		YPR045C	0.102705	0.331338	0.36412		YPR045C	0.233269	0.0409902	0.305971		YPR045C	0.262737	0.00310533	0.0398303
YML055W	0.464905	0.0190093	0.433683		YML055W	2.65583	7.06391e-82	7.41903e-81		YML055W	2.19092	6.81287e-54	5.43562e-53		YML055W	0.0512052	0.715248	0.920036		YML055W	-0.4137	0.00312081	0.0398303
YJL042W	0.0325671	0.810044	0.999031		YJL042W	-0.945672	2.63822e-24	8.49605e-24		YJL042W	-0.978239	3.23438e-23	1.13576e-22		YJL042W	0.278568	0.00914348	0.144884		YJL042W	0.246001	0.00313873	0.0398303
YCR012W	0.107134	0.260611	0.992666		YCR012W	0.995867	1.69644e-49	1.01209e-48		YCR012W	0.888734	9.24471e-40	5.26566e-39		YCR012W	-0.0916803	0.173707	0.573526		YCR012W	-0.198814	0.00313008	0.0398303
YAL059W	0.214485	0.183381	0.971926		YAL059W	1.86014	1.20787e-60	8.83682e-60		YAL059W	1.64565	1.22828e-46	8.2452e-46		YAL059W	-0.110377	0.34874	0.75447		YAL059W	-0.324862	0.00316295	0.0398303
YKL092C	-0.0575801	0.712528	0.999031		YKL092C	-0.627252	3.59697e-09	6.84275e-09		YKL092C	-0.569672	6.60713e-07	1.18523e-06		YKL092C	0.209413	0.100236	0.470365		YKL092C	0.266993	0.00317346	0.0398665
YGL189C	0.207593	0.015707	0.388281		YGL189C	-0.141805	0.0194809	0.0244705		YGL189C	-0.349398	9.27324e-09	1.84667e-08		YGL189C	0.0299967	0.624153	0.884809		YGL189C	-0.177597	0.00323084	0.0404901
YGR161W-A	-0.361164	0.00687406	0.244734		YGR161W-A	-1.77013	1.38451e-78	1.3743e-77		YGR161W-A	-1.40897	4.07196e-50	2.99041e-49		YGR161W-A	-0.0885802	0.357533	0.756255		YGR161W-A	0.272583	0.00326379	0.0407078
YHR062C	-0.0111163	0.942534	0.999031		YHR062C	-0.241293	0.0267132	0.0331026		YHR062C	-0.230177	0.0350153	0.0437586		YHR062C	-0.285913	0.0198103	0.220571		YHR062C	-0.274796	0.00325641	0.0407078
YOL125W	0.173384	0.350913	0.999031		YOL125W	0.0330721	0.79968	0.818636		YOL125W	-0.140312	0.289706	0.321236		YOL125W	-0.155715	0.293517	0.711981		YOL125W	-0.329099	0.00333579	0.0414225
YPL249C	0.0228777	0.871836	0.999031		YPL249C	0.571869	3.84201e-09	7.29931e-09		YPL249C	0.548991	1.09156e-07	2.04628e-07		YPL249C	0.290093	0.00761677	0.130247		YPL249C	0.267215	0.00334266	0.0414225
YCR083W	0.295694	0.148487	0.94152		YCR083W	1.46362	1.70724e-24	5.53801e-24		YCR083W	1.16793	1.31297e-15	3.5622e-15		YCR083W	-0.0938524	0.546752	#N/A		YCR083W	-0.389546	0.00334487	0.0414225
YDL241W	0.262952	0.161056	0.951618		YDL241W	1.49302	6.41296e-30	2.40051e-29		YDL241W	1.23007	4.11943e-20	1.31708e-19		YDL241W	-0.0964117	0.496364	0.830782		YDL241W	-0.359364	0.00346277	0.0425798
YMR161W	0.366051	0.0130506	0.35689		YMR161W	2.20244	7.18964e-102	9.7439e-101		YMR161W	1.83639	1.46389e-67	1.49938e-66		YMR161W	0.0688539	0.519245	0.838145		YMR161W	-0.297197	0.00345616	0.0425798
YBL076C	-0.0444543	0.633805	0.999031		YBL076C	-0.748164	7.90031e-30	2.94772e-29		YBL076C	-0.70371	1.58395e-26	6.17676e-26		YBL076C	-0.23427	0.000475105	0.0211938		YBL076C	-0.189816	0.00345281	0.0425798
YER035W	0.243914	0.131591	0.916564		YER035W	1.15391	3.51519e-26	1.1917e-25		YER035W	0.91	2.64404e-14	6.77038e-14		YER035W	0.551022	7.34808e-06	0.000815041		YER035W	0.307108	0.00350001	0.0429368
YBR191W	0.139512	0.146613	0.93574		YBR191W	1.06366	2.81972e-55	1.87345e-54		YBR191W	0.92415	4.54092e-42	2.75165e-41		YBR191W	-0.0580092	0.394943	0.784916		YBR191W	-0.197521	0.00354016	0.0432264
YEL006W	0.3481	0.079043	0.834002		YEL006W	-1.00192	1.70703e-13	3.9123e-13		YEL006W	-1.35002	7.97688e-21	2.60803e-20		YEL006W	0.0469131	0.781548	0.952055		YEL006W	-0.301187	0.00353911	0.0432264
YBL068W	0.0981234	0.440744	0.999031		YBL068W	0.372258	3.2364e-05	5.02119e-05		YBL068W	0.274135	0.00243339	0.00341299		YBL068W	-0.148111	0.119843	0.498812		YBL068W	-0.246234	0.00355021	0.043248
YLR454W	-0.136071	0.415455	0.999031		YLR454W	-2.10454	3.36298e-75	3.14912e-74		YLR454W	-1.96847	5.08952e-59	4.44239e-58		YLR454W	0.142431	0.298446	0.713728		YLR454W	0.278501	0.0036091	0.0437614
YMR100W	-0.165788	0.387685	0.999031		YMR100W	-1.05301	6.72681e-16	1.68812e-15		YMR100W	-0.88722	2.97185e-10	6.40048e-10		YMR100W	0.13825	0.390562	0.78265		YMR100W	0.304038	0.00360093	0.0437614
YDL143W	0.0922664	0.335883	0.999031		YDL143W	1.23301	1.63066e-74	1.49078e-73		YDL143W	1.14075	5.05032e-63	4.76773e-62		YDL143W	-0.0998236	0.150849	0.544968		YDL143W	-0.19209	0.00363886	0.04402
YDR012W	0.170862	0.0547595	0.732325		YDR012W	1.81898	5.26964e-184	1.43846e-182		YDR012W	1.64812	3.16439e-151	8.3618e-150		YDR012W	-0.0118083	0.851223	0.962932		YDR012W	-0.18267	0.00365091	0.0440638
YBL055C	0.0495068	0.76867	0.999031		YBL055C	0.568521	1.68508e-06	2.83064e-06		YBL055C	0.519014	1.35962e-05	2.26878e-05		YBL055C	-0.260365	0.045425	0.322679		YBL055C	-0.309872	0.00370151	0.0445716
YGL148W	0.196	0.0742076	0.819606		YGL148W	0.700076	1.58927e-19	4.48203e-19		YGL148W	0.504076	9.23189e-11	2.04146e-10		YGL148W	-0.0259069	0.742213	0.933796		YGL148W	-0.221907	0.00371268	0.0446033
YOL080C	0.180313	0.244606	0.986566		YOL080C	1.1473	4.468e-26	1.5103e-25		YOL080C	0.966985	2.15117e-18	6.47028e-18		YOL080C	-0.11318	0.334438	0.744474		YOL080C	-0.293493	0.00376995	0.0451875
YLR178C	0.485004	0.0133138	0.35689		YLR178C	0.585711	4.06504e-06	6.68307e-06		YLR178C	0.100706	0.49946	0.532493		YLR178C	0.822846	1.70811e-07	3.68952e-05		YLR178C	0.337842	0.00380087	0.0453501
YPR184W	0.66375	0.00306376	0.152844		YPR184W	-1.96633	2.80749e-45	1.51841e-44		YPR184W	-2.63008	1.08881e-50	8.07814e-50		YPR184W	0.981379	5.13814e-07	9.16823e-05		YPR184W	0.317628	0.00379403	0.0453501
YFR018C	0.140826	0.419352	0.999031		YFR018C	-0.756567	6.0119e-10	1.18862e-09		YFR018C	-0.897392	5.41831e-13	1.32135e-12		YFR018C	-0.155293	0.271388	0.690731		YFR018C	-0.296119	0.00381359	0.0453982
YEL044W	0.20892	0.188705	0.977774		YEL044W	1.79188	3.6956e-58	2.5829e-57		YEL044W	1.58296	2.40601e-44	1.53682e-43		YEL044W	-0.102164	0.382664	0.776947		YEL044W	-0.311084	0.00382403	0.0454191
YKL161C	0.105995	0.623104	0.999031		YKL161C	-1.25165	1.19299e-18	3.28128e-18		YKL161C	-1.35765	6.13128e-17	1.74015e-16		YKL161C	0.426142	0.0212589	0.22357		YKL161C	0.320147	0.00387545	0.0459254
YDR234W	0.0307818	0.779041	0.999031		YDR234W	-0.407769	1.3612e-07	2.41857e-07		YDR234W	-0.43855	1.72152e-08	3.37024e-08		YDR234W	-0.181929	0.0251637	0.2488		YDR234W	-0.212711	0.00390586	0.0461811
YJR048W	0.438977	1.39374e-05	0.00294676		YJR048W	2.99928	0	0		YJR048W	2.5603	7.95131e-277	4.60142e-275		YJR048W	0.23136	0.00109487	0.0368831		YJR048W	-0.207617	0.00393995	0.046479
YDL020C	-0.0931757	0.418874	0.999031		YDL020C	0.288031	0.000312423	0.000456564		YDL020C	0.381206	4.45736e-06	7.65878e-06		YDL020C	0.122434	0.162231	0.5569		YDL020C	0.215609	0.0039976	0.0470528
YDL046W	0.235862	0.0347711	0.569681		YDL046W	0.475277	1.19759e-09	2.33507e-09		YDL046W	0.239415	0.00271039	0.00377952		YDL046W	0.0240505	0.77467	0.948585		YDL046W	-0.211811	0.00403116	0.0473412
YAR071W	0.0398426	0.780045	0.999031		YAR071W	0.892942	8.53176e-19	2.35335e-18		YAR071W	0.8531	2.79994e-17	8.06132e-17		YAR071W	-0.248449	0.0142226	0.18387		YAR071W	-0.288292	0.00409554	0.0479894
YGL076C	0.0777917	0.434958	0.999031		YGL076C	1.63691	1.85629e-119	3.11373e-118		YGL076C	1.55911	1.85532e-108	3.40849e-107		YGL076C	-0.124179	0.0782992	0.419669		YGL076C	-0.201971	0.00410801	0.0480278
YNR043W	0.0493132	0.619158	0.999031		YNR043W	0.329645	2.50095e-06	4.15532e-06		YNR043W	0.280332	6.65819e-05	0.000105632		YNR043W	-0.147291	0.0400202	0.300811		YNR043W	-0.196604	0.00412808	0.0481548
YMR243C	0.106661	0.31362	0.999031		YMR243C	-0.946907	4.54066e-37	2.03696e-36		YMR243C	-1.05357	1.55602e-44	9.97194e-44		YMR243C	-0.0934492	0.240251	0.655144		YMR243C	-0.20011	0.00414512	0.0482458
YMR009W	0.393807	0.0089992	0.288624		YMR009W	1.99342	1.92651e-80	1.98023e-79		YMR009W	1.59961	1.99721e-49	1.43933e-48		YMR009W	0.0998828	0.36563	0.761313		YMR009W	-0.293924	0.00419718	0.0487432
YBR291C	-0.0715305	0.676688	0.999031		YBR291C	-0.502897	3.59529e-05	5.56308e-05		YBR291C	-0.431367	0.00035929	0.000539215		YBR291C	-0.357225	0.0104301	0.157953		YBR291C	-0.285694	0.00422618	0.0489712
YFL002W-B	-0.357492	0.00810147	0.268437		YFL002W-B	-1.76927	6.24373e-77	5.97231e-76		YFL002W-B	-1.41178	2.56293e-49	1.84244e-48		YFL002W-B	-0.0897594	0.35599	0.756255		YFL002W-B	0.267732	0.00425649	0.0492133
YDR011W	-0.126556	0.204774	0.982177		YDR011W	-1.08894	9.96715e-55	6.53227e-54		YDR011W	-0.962386	1.38908e-41	8.31291e-41		YDR011W	0.0623059	0.404671	0.788676		YDR011W	0.188862	0.00427689	0.0493401
YER056C	0.128844	0.192739	0.977774		YER056C	0.799897	1.83017e-30	6.93142e-30		YER056C	0.671053	1.13198e-21	3.79754e-21		YER056C	-0.0663708	0.352943	0.756255		YER056C	-0.195215	0.00432105	0.0497396
YDL166C	0.328149	0.0551348	0.732443		YDL166C	3.24791	3.46112e-161	8.311e-160		YDL166C	2.91976	9.60001e-127	2.14499e-125		YDL166C	-0.0318601	0.782712	0.952396		YDL166C	-0.360009	0.00434089	0.0498582
YDL192W	0.188903	0.0744985	0.820777		YDL192W	1.00167	5.62502e-41	2.77038e-40		YDL192W	0.812768	2.54405e-27	1.01604e-26		YDL192W	-0.021844	0.773376	0.948585		YDL192W	-0.210747	0.00435563	0.0499179
YIL115C	-0.0895314	0.368105	0.999031		YIL115C	-0.179487	0.00979933	0.0126244		YIL115C	-0.089956	0.206295	0.234268		YIL115C	0.0987841	0.184049	0.59242		YIL115C	0.188315	0.0043692	0.0499637
YIL129C	-0.176004	0.153245	0.945011		YIL129C	-1.73473	8.4502e-92	1.0209e-90		YIL129C	-1.55872	7.46584e-69	7.86973e-68		YIL129C	0.0307462	0.757515	0.940363		YIL129C	0.20675	0.004401	0.0502175
YOR071C	0.106331	0.590921	0.999031		YOR071C	-1.074	9.09748e-15	2.19546e-14		YOR071C	-1.18033	6.30189e-17	1.7877e-16		YOR071C	-0.188173	0.264366	0.683653		YOR071C	-0.294505	0.00443171	0.0504288
YNL132W	-0.0296352	0.784627	0.999031		YNL132W	-0.69562	1.03273e-19	2.93682e-19		YNL132W	-0.665985	4.21154e-18	1.25242e-17		YNL132W	-0.237266	0.00309423	0.0713411		YNL132W	-0.207631	0.00443882	0.0504288
YHL033C	0.159902	0.0704578	0.800084		YHL033C	3.02898	0	0		YHL033C	2.86908	0	0		YHL033C	-0.0182549	0.769676	0.947883		YHL033C	-0.178157	0.0044666	0.0505508
YIL020C	0.20364	0.235062	0.982177		YIL020C	1.46359	4.50194e-34	1.87565e-33		YIL020C	1.25995	6.66708e-25	2.47482e-24		YIL020C	-0.118876	0.355348	0.756255		YIL020C	-0.322516	0.0044689	0.0505508
YKL195W	-0.0936784	0.448185	0.999031		YKL195W	0.992004	7.01335e-31	2.68605e-30		YKL195W	1.08568	2.2347e-34	1.09409e-33		YKL195W	0.142976	0.116805	0.495248		YKL195W	0.236654	0.00451379	0.0508932
YFR053C	0.0557666	0.886219	0.999031		YFR053C	0.488726	0.0754794	0.0894531		YFR053C	0.432959	0.117003	0.137649		YFR053C	0.835421	0.00252332	0.0639241		YFR053C	0.779654	0.00451865	0.0508932
YDR210C-C	-0.193375	0.149405	0.941618		YDR210C-C	-3.76072	0	0		YDR210C-C	-3.56734	0	0		YDR210C-C	-0.401748	0.000345537	0.0175072		YDR210C-C	-0.208372	0.00453157	0.0509289
YDR139C	0.644412	0.0187589	#N/A		YDR139C	3.59473	1.32076e-76	1.25918e-75		YDR139C	2.95032	2.18226e-52	1.67268e-51		YDR139C	0.0571512	0.750343	#N/A		YDR139C	-0.587261	0.00458536	0.051094
YOR374W	0.257205	0.104674	0.882851		YOR374W	1.14912	1.66405e-25	5.54397e-25		YOR374W	0.891917	5.25517e-15	1.39057e-14		YOR374W	0.565421	9.5037e-07	0.000150012		YOR374W	0.308216	0.00458402	0.051094
YPL225W	0.348239	0.0120221	0.339643		YPL225W	2.21122	4.11374e-114	6.36529e-113		YPL225W	1.86298	1.78511e-79	2.24088e-78		YPL225W	0.0732466	0.459749	0.816094		YPL225W	-0.274993	0.00458312	0.051094
YML106W	-0.00710664	0.94815	0.999031		YML106W	0.594281	1.31514e-14	3.15798e-14		YML106W	0.601387	7.93853e-15	2.08063e-14		YML106W	-0.219462	0.00581407	0.106292		YML106W	-0.212356	0.004584	0.051094
YGR094W	-0.0166357	0.843446	0.999031		YGR094W	-0.423125	1.16389e-12	2.59055e-12		YGR094W	-0.40649	9.18278e-12	2.11716e-11		YGR094W	-0.183	0.00244876	0.0628106		YGR094W	-0.166364	0.00460245	0.0511753
YCR053W	0.0288033	0.744407	0.999031		YCR053W	0.413831	3.2923e-11	6.8931e-11		YCR053W	0.385028	7.48782e-10	1.58146e-09		YCR053W	-0.145702	0.0214091	0.22357		YCR053W	-0.174506	0.00461232	0.0511761
YKR075C	0.174544	0.50516	#N/A		YKR075C	1.71174	3.55131e-20	1.02654e-19		YKR075C	1.53719	7.59026e-17	2.14791e-16		YKR075C	-0.31491	0.109232	#N/A		YKR075C	-0.489455	0.00467824	0.0517976
YJL034W	0.0146788	0.86691	0.999031		YJL034W	0.251363	4.68376e-05	7.18964e-05		YJL034W	0.236684	0.000139053	0.000215332		YJL034W	0.187713	0.00272847	0.0674558		YJL034W	0.173034	0.00470993	0.0520382
YDL051W	0.0889677	0.446459	0.999031		YDL051W	1.04289	1.03383e-36	4.60567e-36		YDL051W	0.953921	1.14212e-30	5.01094e-30		YDL051W	-0.138487	0.101494	0.470517		YDL051W	-0.227455	0.00479887	0.0527322
YOL151W	-0.0492633	0.738811	0.999031		YOL151W	0.556214	5.15241e-08	9.3324e-08		YOL151W	0.605477	1.41762e-08	2.79325e-08		YOL151W	0.225081	0.042953	0.312311		YOL151W	0.274344	0.00480301	0.0527322
YPL070W	-0.202587	0.219184	0.982177		YPL070W	-0.53544	2.30742e-06	3.84149e-06		YPL070W	-0.332853	0.00544409	0.00737303		YPL070W	0.0721917	0.587368	0.868054		YPL070W	0.274779	0.00478571	0.0527322
YCL002C	0.32344	0.216176	#N/A		YCL002C	-1.14284	2.28887e-10	4.6088e-10		YCL002C	-1.46628	1.01004e-14	2.63767e-14		YCL002C	-0.0360786	0.874398	#N/A		YCL002C	-0.359519	0.00486425	0.0532926
YMR269W	0.624728	0.0344202	0.56602		YMR269W	4.75839	1.18651e-109	1.77425e-108		YMR269W	4.13366	1.4892e-91	2.20975e-90		YMR269W	-0.0707283	0.661896	#N/A		YMR269W	-0.695457	0.00489325	0.0534982
YDR141C	0.006088	0.958986	0.999031		YDR141C	-1.15116	2.41692e-45	1.30962e-44		YDR141C	-1.15725	2.2946e-41	1.36754e-40		YDR141C	0.208814	0.0260976	0.252743		YDR141C	0.202726	0.00495425	0.054052
YOL090W	-0.0738182	0.523645	0.999031		YOL090W	-0.312323	9.83717e-05	0.000147864		YOL090W	-0.238505	0.00427092	0.00584852		YOL090W	0.132861	0.136757	0.521355		YOL090W	0.206679	0.00501665	0.0542796
YGL164C	-0.195901	0.311464	0.999031		YGL164C	0.886145	1.62982e-11	3.44729e-11		YGL164C	1.08205	2.49867e-14	6.40948e-14		YGL164C	0.14853	0.320979	0.732654		YGL164C	0.344431	0.0050098	0.0542796
YMR080C	-0.188673	0.0725521	0.809403		YMR080C	-1.23451	1.03708e-61	7.7042e-61		YMR080C	-1.04584	3.29214e-45	2.14304e-44		YMR080C	-0.375498	3.85146e-06	0.000509884		YMR080C	-0.186825	0.00501197	0.0542796
YJL159W	-0.0866885	0.387611	0.999031		YJL159W	0.578752	3.32571e-16	8.4523e-16		YJL159W	0.665441	6.9372e-21	2.27583e-20		YJL159W	0.112109	0.114676	0.49512		YJL159W	0.198797	0.00500752	0.0542796
YBR164C	0.262428	0.0892284	0.838129		YBR164C	3.40433	8.17904e-217	2.8861e-215		YBR164C	3.1419	2.87936e-179	9.85968e-178		YBR164C	-0.0602906	0.558257	0.852234		YBR164C	-0.322719	0.00503448	0.0543598
YER079W	-0.306416	0.218023	#N/A		YER079W	0.413286	0.0144863	0.0183641		YER079W	0.719702	8.02636e-05	0.000126528		YER079W	0.120154	0.541409	#N/A		YER079W	0.42657	0.00506918	0.0546218
YPR190C	0.00933793	0.94026	0.999031		YPR190C	-0.342736	9.38326e-05	0.000141261		YPR190C	-0.352074	6.89527e-05	0.000109144		YPR190C	-0.212314	0.0272486	0.2559		YPR190C	-0.221652	0.00515241	0.0554043
YCR031C	0.119005	0.19838	0.982177		YCR031C	0.764689	1.34275e-31	5.26454e-31		YCR031C	0.645684	6.05266e-23	2.10751e-22		YCR031C	-0.0631052	0.336945	0.746623		YCR031C	-0.18211	0.00517198	0.0555005
YPL028W	0.112668	0.223083	0.982177		YPL028W	0.746577	2.59411e-30	9.79265e-30		YPL028W	0.63391	3.88084e-22	1.3242e-21		YPL028W	-0.0673639	0.309918	0.722672		YPL028W	-0.180032	0.00519551	0.0555302
YHR010W	0.165622	0.106549	0.884702		YHR010W	1.00894	5.35867e-44	2.81659e-43		YHR010W	0.843316	3.461e-31	1.54782e-30		YHR010W	-0.0364916	0.616219	0.88299		YHR010W	-0.202113	0.00519599	0.0555302
YIL101C	-0.338737	0.439665	#N/A		YIL101C	-1.45732	5.70999e-07	9.83151e-07		YIL101C	-1.11859	0.000635328	0.000935295		YIL101C	0.286213	0.447488	#N/A		YIL101C	0.624949	0.00527283	0.0562363
YOR039W	0.113685	0.358405	0.999031		YOR039W	-0.317429	0.000247792	0.000363675		YOR039W	-0.431114	1.08596e-06	1.92893e-06		YOR039W	-0.0997966	0.304883	0.718763		YOR039W	-0.213482	0.00529808	0.0563905
YLR099C	0.0857909	0.57023	0.999031		YLR099C	-1.00706	4.09602e-23	1.27782e-22		YLR099C	-1.09285	1.40055e-22	4.84168e-22		YLR099C	0.321061	0.0104117	0.157953		YLR099C	0.23527	0.0053323	0.0566179
YIL068C	-0.229036	0.115984	0.894614		YIL068C	-0.497112	7.73739e-07	1.32357e-06		YIL068C	-0.268076	0.0109907	0.0144421		YIL068C	0.011897	0.919185	0.978689		YIL068C	0.240933	0.00534693	0.0566179
YIL064W	-0.0207348	0.890774	0.999031		YIL064W	-0.138412	0.194087	0.21873		YIL064W	-0.117678	0.271184	0.302553		YIL064W	-0.279977	0.0185221	0.209407		YIL064W	-0.259242	0.00535194	0.0566179
YPR138C	-0.0810791	0.643654	0.999031		YPR138C	-1.7916	4.6805e-47	2.6374e-46		YPR138C	-1.71052	1.28709e-43	8.11368e-43		YPR138C	-0.342009	0.020923	0.22357		YPR138C	-0.26093	0.0053759	0.0567565
YKR025W	0.176511	0.269919	0.999031		YKR025W	1.73267	1.53439e-53	9.87708e-53		YKR025W	1.55616	1.38971e-42	8.53743e-42		YKR025W	-0.127551	0.275051	0.696365		YKR025W	-0.304062	0.00539476	0.0568408
YPL012W	-0.0830129	0.407934	0.999031		YPL012W	-0.183632	0.00956155	0.0123256		YPL012W	-0.100619	0.156433	0.181201		YPL012W	-0.272026	0.000224991	0.0137816		YPL012W	-0.189013	0.00545053	0.0572728
YNL220W	0.0559775	0.66018	0.999031		YNL220W	0.624439	3.5287e-12	7.68558e-12		YNL220W	0.568462	3.02862e-10	6.5179e-10		YNL220W	-0.184636	0.0479109	0.332701		YNL220W	-0.240613	0.00545768	0.0572728
YDR507C	-0.128414	0.248436	0.986566		YDR507C	0.443404	1.23152e-08	2.28864e-08		YDR507C	0.571818	6.29181e-13	1.52858e-12		YDR507C	0.0804846	0.325597	0.735278		YDR507C	0.208898	0.00555681	0.0580798
YPR145W	0.0079093	0.938792	0.999031		YPR145W	-0.49533	1.01335e-11	2.16075e-11		YPR145W	-0.503239	4.99185e-12	1.17287e-11		YPR145W	-0.19196	0.00908865	0.144573		YPR145W	-0.199869	0.00555132	0.0580798
YPR172W	0.163847	0.227412	0.982177		YPR172W	0.912466	7.39178e-22	2.23491e-21		YPR172W	0.748619	1.17568e-14	3.06472e-14		YPR172W	-0.0800988	0.43818	0.805826		YPR172W	-0.243946	0.00559125	0.058207
YHR088W	0.11698	0.367572	0.999031		YHR088W	1.5999	5.73819e-69	4.81958e-68		YHR088W	1.48292	6.70177e-58	5.72868e-57		YHR088W	-0.127177	0.182338	0.589169		YHR088W	-0.244157	0.00558107	0.058207
YGR175C	0.105699	0.386846	0.999031		YGR175C	0.978174	8.97521e-30	3.34447e-29		YGR175C	0.872475	5.84533e-24	2.09975e-23		YGR175C	-0.131538	0.130093	0.514862		YGR175C	-0.237238	0.00571536	0.0589122
YLL050C	0.279772	0.00578989	0.220132		YLL050C	1.74151	3.02019e-131	5.73045e-130		YLL050C	1.46174	8.74663e-92	1.30456e-90		YLL050C	0.0833131	0.249529	0.66758		YLL050C	-0.196459	0.00567296	0.0589122
YBR104W	-0.00994209	0.949143	0.999031		YBR104W	0.683235	5.3724e-10	1.06473e-09		YBR104W	0.693177	3.38611e-10	7.2495e-10		YBR104W	-0.288121	0.0154867	0.190038		YBR104W	-0.278179	0.00571442	0.0589122
YBR269C	0.742548	8.04077e-05	0.0102003		YBR269C	2.57459	1.23087e-87	1.41893e-86		YBR269C	1.83204	4.45754e-41	2.62954e-40		YBR269C	0.381166	0.00493326	0.0979105		YBR269C	-0.361381	0.00568807	0.0589122
YBR289W	-0.00445606	0.971751	0.999031		YBR289W	-0.0219523	0.799521	0.818618		YBR289W	-0.0174963	0.848267	0.864704		YBR289W	0.213166	0.0299088	0.263969		YBR289W	0.217622	0.00569539	0.0589122
YBR012W-A	0.00237485	0.982784	0.9991		YBR012W-A	-2.20699	1.77644e-178	4.67284e-177		YBR012W-A	-2.20937	9.18807e-176	3.05583e-174		YBR012W-A	-0.188203	0.0281346	0.257733		YBR012W-A	-0.190578	0.00575796	0.0592345
YGR008C	0.140544	0.605939	#N/A		YGR008C	3.58283	8.78287e-95	1.09776e-93		YGR008C	3.44229	2.4164e-60	2.16466e-59		YGR008C	0.723953	2.46961e-05	#N/A		YGR008C	0.583409	0.00582111	0.0597665
YDR034C-C	-0.269841	0.0364054	0.592088		YDR034C-C	-0.832377	5.37368e-20	1.54637e-19		YDR034C-C	-0.562536	7.76495e-10	1.637e-09		YDR034C-C	-0.0245055	0.792743	0.955932		YDR034C-C	0.245336	0.00587981	0.0598984
YJL084C	0.0170758	0.904227	0.999031		YJL084C	-1.22167	1.01218e-36	4.51269e-36		YJL084C	-1.23875	1.09994e-32	5.11687e-32		YJL084C	0.240466	0.0389512	0.297097		YJL084C	0.22339	0.00587255	0.0598984
YHR215W	0.0322443	0.822349	0.999031		YHR215W	0.587936	7.00831e-09	1.31508e-08		YHR215W	0.555692	4.46996e-08	8.55412e-08		YHR215W	-0.246235	0.0157997	0.191094		YHR215W	-0.278479	0.00586505	0.0598984
YIL156W-B	0.784916	0.00689004	0.244734		YIL156W-B	5.41854	1.6224e-146	3.45178e-145		YIL156W-B	4.63362	3.43042e-118	6.9412e-117		YIL156W-B	0.0995188	0.507234	0.833599		YIL156W-B	-0.685397	0.00585577	0.0598984
YOL124C	0.139935	0.353202	0.999031		YOL124C	0.860056	4.08689e-16	1.03279e-15		YOL124C	0.720121	2.05113e-11	4.65303e-11		YOL124C	-0.128982	0.26122	0.677653		YOL124C	-0.268917	0.00589842	0.0599711
YNL142W	-0.0305191	0.932023	0.999031		YNL142W	-0.508576	0.0450087	0.0546967		YNL142W	-0.478057	0.058098	0.0707966		YNL142W	-0.715681	0.0053406	0.101943		YNL142W	-0.685163	0.00593303	0.0602058
YOR275C	-0.416042	0.0303397	0.538834		YOR275C	-1.40983	4.97891e-26	1.68006e-25		YOR275C	-0.993784	6.05889e-13	1.47385e-12		YOR275C	-0.123839	0.439099	0.806262		YOR275C	0.292204	0.00595589	0.0603207
YKL106W	0.0811453	0.532257	0.999031		YKL106W	-0.249442	0.00619144	0.00814315		YKL106W	-0.330587	0.000357525	0.000536705		YKL106W	-0.141143	0.165196	0.558917		YKL106W	-0.222288	0.0059701	0.0603477
YOR222W	-0.13342	0.34174	0.999031		YOR222W	0.32708	0.0010065	0.00141134		YOR222W	0.4605	3.29913e-06	5.69913e-06		YOR222W	-0.37957	0.000440687	0.0201007		YOR222W	-0.24615	0.00601212	0.0604219
YGR074W	0.297011	0.0474603	0.676419		YGR074W	0.726503	3.10065e-12	6.76855e-12		YGR074W	0.429492	6.65884e-05	0.000105632		YGR074W	0.0354875	0.759084	0.941742		YGR074W	-0.261524	0.00601137	0.0604219
YHR174W	0.0201736	0.83039	0.999031		YHR174W	1.25288	5.81194e-79	5.79891e-78		YHR174W	1.2327	1.73059e-76	2.06068e-75		YHR174W	-0.16277	0.0145466	0.185808		YHR174W	-0.182944	0.00599814	0.0604219
YCR030C	0.0349058	0.752362	0.999031		YCR030C	-0.502535	6.02514e-11	1.24973e-10		YCR030C	-0.537441	1.47871e-11	3.37299e-11		YCR030C	0.232725	0.00556943	0.104848		YCR030C	0.19782	0.00603539	0.0605393
YBL042C	0.00325859	0.977254	0.9991		YBL042C	-0.212497	0.00833551	0.0108326		YBL042C	-0.215756	0.00779309	0.010377		YBL042C	-0.203018	0.0183239	0.207738		YBL042C	-0.206277	0.00609083	0.0609783
YOR142W-A	-0.06565	0.531336	0.999031		YOR142W-A	-2.34117	8.37591e-220	3.01064e-218		YOR142W-A	-2.27552	9.15992e-206	3.75946e-204		YOR142W-A	-0.243871	0.00304336	0.0709656		YOR142W-A	-0.178221	0.00611762	0.0611294
YKL129C	0.023202	0.861997	0.999031		YKL129C	-0.976096	8.77645e-27	3.02678e-26		YKL129C	-0.999298	1.24975e-24	4.58903e-24		YKL129C	0.238476	0.027097	0.2559		YKL129C	0.215274	0.00614113	0.0612472
YGR285C	0.0874809	0.354176	0.999031		YGR285C	0.899588	1.82379e-41	9.13e-41		YGR285C	0.812107	5.68843e-34	2.76397e-33		YGR285C	-0.093988	0.162398	0.5569		YGR285C	-0.181469	0.0061579	0.0612975
YNL113W	0.156425	0.216282	0.982177		YNL113W	1.37575	4.31423e-54	2.79266e-53		YNL113W	1.21932	9.35041e-42	5.61898e-41		YNL113W	-0.0786499	0.396929	0.785812		YNL113W	-0.235075	0.00622692	0.0615208
YNR053C	0.152806	0.13416	0.916564		YNR053C	0.506106	1.63251e-12	3.60723e-12		YNR053C	0.353301	1.13918e-06	2.01974e-06		YNR053C	-0.0352553	0.640115	0.891728		YNR053C	-0.188061	0.00619651	0.0615208
YKL099C	0.145726	0.304166	0.999031		YKL099C	1.87958	1.55131e-79	1.56402e-78		YKL099C	1.73385	5.05662e-66	5.04528e-65		YKL099C	-0.119949	0.245701	0.662956		YKL099C	-0.265675	0.00623852	0.0615208
YKL067W	0.592173	0.000941255	0.0663361		YKL067W	3.89663	1.23578e-211	3.99524e-210		YKL067W	3.30446	1.11297e-147	2.90125e-146		YKL067W	0.226853	0.0572262	0.362704		YKL067W	-0.36532	0.00621128	0.0615208
YCR047C	0.201466	0.210623	0.982177		YCR047C	1.95367	6.05613e-67	4.90165e-66		YCR047C	1.7522	8.34607e-53	6.47436e-52		YCR047C	-0.101281	0.385935	0.77985		YCR047C	-0.302747	0.00623919	0.0615208
YOR099W	0.168145	0.120606	0.899216		YOR099W	0.337261	9.37168e-06	1.50191e-05		YOR099W	0.169116	0.0282328	0.0355955		YOR099W	-0.0311732	0.697178	0.913122		YOR099W	-0.199318	0.00626471	0.0616214
YOR181W	0.0318172	0.818395	0.999031		YOR181W	-0.774694	4.64208e-16	1.169e-15		YOR181W	-0.806511	1.01688e-15	2.77187e-15		YOR181W	0.268972	0.0127907	0.177161		YOR181W	0.237155	0.00627297	0.0616214
YKL156W	0.289911	0.00459639	0.188963		YKL156W	0.926013	8.12748e-38	3.73284e-37		YKL156W	0.636101	1.98292e-18	5.96731e-18		YKL156W	0.0958878	0.192764	0.60901		YKL156W	-0.194023	0.00629836	0.0617547
YPR062W	0.410956	0.00492879	0.197151		YPR062W	4.25909	0	0		YPR062W	3.84814	3.23353e-298	2.25451e-296		YPR062W	0.106139	0.259482	0.677653		YPR062W	-0.304816	0.00641059	0.0627374
YMR049C	-0.104188	0.310287	0.999031		YMR049C	0.545233	5.75364e-14	1.34748e-13		YMR049C	0.649421	3.94504e-19	1.2189e-18		YMR049C	-0.297103	6.44926e-05	0.00561119		YMR049C	-0.192915	0.00645102	0.0630151
YBL057C	-0.110117	0.490873	0.999031		YBL057C	-0.0109999	0.922725	0.930118		YBL057C	0.0991174	0.378922	0.413038		YBL057C	-0.375614	0.00299693	0.0702885		YBL057C	-0.265497	0.00654407	0.0637348
YNL262W	-0.0971427	0.455083	0.999031		YNL262W	-0.98406	5.68272e-28	2.02499e-27		YNL262W	-0.886917	4.34546e-21	1.43289e-20		YNL262W	0.11717	0.257324	0.67596		YNL262W	0.214313	0.0065491	0.0637348
YDR465C	0.0421889	0.744138	0.999031		YDR465C	-0.129847	0.153194	0.175032		YDR465C	-0.172036	0.0611982	0.0743084		YDR465C	-0.1815	0.0684337	0.390414		YDR465C	-0.223689	0.00662396	0.0642982
YDR516C	0.136703	0.363138	0.999031		YDR516C	0.652236	3.80424e-10	7.58881e-10		YDR516C	0.515533	1.96965e-06	3.43946e-06		YDR516C	0.411162	0.000219087	0.0137377		YDR516C	0.274459	0.0066316	0.0642982
YGR118W	0.160051	0.140631	0.927907		YGR118W	2.96342	0	0		YGR118W	2.80337	4.1557e-291	2.76426e-289		YGR118W	-0.0487884	0.524431	0.841385		YGR118W	-0.208839	0.00666171	0.0644705
YPL174C	-0.442065	0.231875	#N/A		YPL174C	-1.64548	5.49691e-11	1.14303e-10		YPL174C	-1.20341	9.35718e-06	1.57872e-05		YPL174C	0.0247988	0.939588	#N/A		YPL174C	0.466863	0.0067058	0.0646578
YKL084W	0.397938	0.0426974	0.644818		YKL084W	-0.372003	0.00581661	0.00767633		YKL084W	-0.76994	6.81767e-08	1.29315e-07		YKL084W	0.096631	0.550534	0.850546		YKL084W	-0.301307	0.00670532	0.0646578
YLR410W-A	-0.286593	0.0264867	0.495199		YLR410W-A	-0.857048	4.8742e-21	1.44429e-20		YLR410W-A	-0.570455	4.71445e-10	1.00451e-09		YLR410W-A	-0.0448243	0.631279	0.886842		YLR410W-A	0.241769	0.00672344	0.0647085
YDL179W	-0.202921	0.167769	0.956742		YDL179W	-0.628221	6.45403e-10	1.27386e-09		YDL179W	-0.4253	6.32651e-05	0.000100554		YDL179W	0.0371378	0.75179	0.937781		YDL179W	0.240059	0.00674879	0.064833
YBL027W	0.303708	0.0129203	0.356311		YBL027W	1.37897	2.07645e-57	1.42374e-56		YBL027W	1.07526	1.55527e-35	7.89503e-35		YBL027W	0.070201	0.417218	0.79246		YBL027W	-0.233507	0.0067764	0.0649789
YDR325W	-0.256062	0.113155	0.889162		YDR325W	-0.969199	3.56626e-18	9.67555e-18		YDR325W	-0.713137	1.09909e-09	2.29784e-09		YDR325W	-0.00816528	0.951108	0.985402		YDR325W	0.247896	0.00681227	0.0650857
YGL135W	0.0896218	0.410144	0.999031		YGL135W	2.36168	5.25603e-207	1.65308e-205		YGL135W	2.27206	1.50552e-191	5.54931e-190		YGL135W	-0.118489	0.123631	0.505865		YGL135W	-0.20811	0.0068249	0.0650857
YER008C	-0.150415	0.229165	0.982177		YER008C	-0.695481	9.85689e-16	2.45341e-15		YER008C	-0.545066	1.53543e-09	3.19049e-09		YER008C	0.0573502	0.561335	0.854494		YER008C	0.207765	0.00682188	0.0650857
YLR292C	0.183978	0.165932	0.955822		YLR292C	0.604734	7.87631e-11	1.6267e-10		YLR292C	0.420756	9.07025e-06	1.5312e-05		YLR292C	-0.0506771	0.614133	0.882187		YLR292C	-0.234655	0.00685658	0.0651806
YJR022W	0.729771	0.0069684	#N/A		YJR022W	1.85064	2.64876e-23	8.30355e-23		YJR022W	1.12087	1.12098e-08	2.22162e-08		YJR022W	0.254215	0.215859	#N/A		YJR022W	-0.475556	0.00686951	0.0651806
YJR135W-A	0.419711	0.0131233	0.35689		YJR135W-A	3.20389	1.38634e-161	3.34281e-160		YJR135W-A	2.78418	3.79723e-117	7.49986e-116		YJR135W-A	0.0851897	0.460358	0.816595		YJR135W-A	-0.334521	0.00687228	0.0651806
YOR027W	0.0412642	0.673701	0.999031		YOR027W	1.11618	1.21016e-58	8.56138e-58		YOR027W	1.07491	5.08281e-54	4.06836e-53		YOR027W	0.227382	0.00110167	0.0368831		YOR027W	0.186118	0.00691208	0.0652032
YLR372W	0.0393679	0.686938	0.999031		YLR372W	-0.222859	0.00121323	0.00169179		YLR372W	-0.262227	0.000153377	0.000236377		YLR372W	-0.140152	0.0502841	0.341101		YLR372W	-0.17952	0.00690292	0.0652032
YPR010C	0.012001	0.900254	0.999031		YPR010C	-0.799805	2.56626e-32	1.02209e-31		YPR010C	-0.811806	5.20228e-33	2.44761e-32		YPR010C	-0.165107	0.0179665	0.206466		YPR010C	-0.177108	0.00690991	0.0652032
YMR264W	0.0707245	0.674925	0.999031		YMR264W	1.03634	2.4253e-18	6.62039e-18		YMR264W	0.96562	7.80211e-16	2.13479e-15		YMR264W	-0.221119	0.0876086	0.442573		YMR264W	-0.291843	0.00692522	0.0652094
YDR087C	0.131747	0.323157	0.999031		YDR087C	1.71771	4.89725e-75	4.54902e-74		YDR087C	1.58596	9.60859e-63	8.99756e-62		YDR087C	-0.115311	0.234397	0.648223		YDR087C	-0.247058	0.00695218	0.0653444
YPR127W	0.284795	0.219257	0.982177		YPR127W	-0.0458604	0.776536	0.7972		YPR127W	-0.330655	0.0466978	0.0575836		YPR127W	-0.0796225	0.672609	#N/A		YPR127W	-0.364418	0.00696655	0.0653444
YER124C	-0.223049	0.0565027	0.737859		YER124C	0.541325	3.51733e-11	7.3536e-11		YER124C	0.764374	6.40982e-20	2.03364e-19		YER124C	-0.0118497	0.891527	0.972587		YER124C	0.211199	0.00697707	0.0653444
YOR278W	0.424841	0.0592095	0.748961		YOR278W	0.545983	0.000445256	0.000642408		YOR278W	0.121142	0.457076	0.490742		YOR278W	0.063074	0.727234	#N/A		YOR278W	-0.361767	0.0070229	0.0656559
YLR150W	0.144282	0.162791	0.951618		YLR150W	0.558441	2.13017e-14	5.06671e-14		YLR150W	0.414159	1.47847e-08	2.90918e-08		YLR150W	-0.0520979	0.477115	0.818542		YLR150W	-0.19638	0.00707217	0.0659985
YJR105W	0.0720634	0.465512	0.999031		YJR105W	0.585882	4.36228e-17	1.14436e-16		YJR105W	0.513818	2.00165e-13	4.97147e-13		YJR105W	-0.11332	0.108887	0.485151		YJR105W	-0.185384	0.00717421	0.0668314
YDL044C	-0.400551	0.0641012	0.771169		YDL044C	0.672515	6.02631e-06	9.79339e-06		YDL044C	1.07307	8.79117e-12	2.02768e-11		YDL044C	-0.0346453	0.836682	#N/A		YDL044C	0.365906	0.00722984	0.0671626
YLR206W	0.0593843	0.616104	0.999031		YLR206W	-0.196834	0.0163331	0.020624		YLR206W	-0.256219	0.00272847	0.00380382		YLR206W	0.265707	0.00320485	0.0726668		YLR206W	0.206323	0.00723546	0.0671626
YMR074C	0.244244	0.0584728	0.748182		YMR074C	1.2318	2.36613e-42	1.20323e-41		YMR074C	0.987551	9.31769e-27	3.65817e-26		YMR074C	0.0118998	0.901074	0.973475		YMR074C	-0.232344	0.007292	0.0675674
YGR108W	0.0662331	0.701888	0.999031		YGR108W	0.12089	0.300011	0.328881		YGR108W	0.0546567	0.668914	0.696099		YGR108W	0.344537	0.0128209	0.177161		YGR108W	0.278304	0.0073389	0.0676422
RDN37-1_rRNA	1.29136	0.0249672	0.475826		RDN37-1_rRNA	6.99696	9.89125e-65	7.72479e-64		RDN37-1_rRNA	5.7056	1.43511e-45	9.37358e-45		RDN37-1_rRNA	0.153973	0.692776	0.912623		RDN37-1_rRNA	-1.13738	0.00732841	0.0676422
RDN37-2_rRNA	1.29136	0.0249672	0.475826		RDN37-2_rRNA	6.99696	9.89125e-65	7.72479e-64		RDN37-2_rRNA	5.7056	1.43511e-45	9.37358e-45		RDN37-2_rRNA	0.153973	0.692776	0.912623		RDN37-2_rRNA	-1.13738	0.00732841	0.0676422
YOR101W	0.116723	0.392643	0.999031		YOR101W	0.582327	1.18933e-09	2.31974e-09		YOR101W	0.465604	1.72702e-06	3.0304e-06		YOR101W	-0.119627	0.251051	0.668143		YOR101W	-0.23635	0.00737902	0.0678921
YGR167W	0.257655	0.0536486	0.721818		YGR167W	4.12788	0	0		YGR167W	3.87022	0	0		YGR167W	-0.0163857	0.847448	0.962932		YGR167W	-0.274041	0.00769746	0.0706976
YBR016W	0.636804	0.000226522	0.0223502		YBR016W	5.10016	0	0		YBR016W	4.46335	6.2451e-288	3.9283e-286		YBR016W	0.260707	0.00855708	0.139358		YBR016W	-0.376098	0.00781506	0.0715262
YJL080C	0.0367817	0.670558	0.999031		YJL080C	0.493573	6.47877e-16	1.62728e-15		YJL080C	0.456791	8.37734e-14	2.1069e-13		YJL080C	-0.124495	0.0434764	0.312503		YJL080C	-0.161277	0.00780258	0.0715262
YDR103W	-0.0806165	0.54505	0.999031		YDR103W	-1.35706	9.94903e-50	5.96015e-49		YDR103W	-1.27644	1.0109e-39	5.7523e-39		YDR103W	0.125299	0.247652	0.665159		YDR103W	0.205915	0.00783814	0.0716121
YHR175W	0.495182	0.00608584	0.228992		YHR175W	1.40042	1.95797e-29	7.2355e-29		YHR175W	0.905235	4.64281e-12	1.09219e-11		YHR175W	0.187218	0.176063	0.576667		YHR175W	-0.307964	0.00789433	0.0718741
YFR055W	0.0445184	0.715216	0.999031		YFR055W	0.559441	8.01544e-11	1.65367e-10		YFR055W	0.514923	2.62514e-09	5.3986e-09		YFR055W	-0.177148	0.0466172	0.327597		YFR055W	-0.221667	0.00788947	0.0718741
YKL210W	-0.0200862	0.818296	0.999031		YKL210W	0.0597655	0.332895	0.362118		YKL210W	0.0798516	0.197219	0.225109		YKL210W	-0.180305	0.0043772	0.0911879		YKL210W	-0.160218	0.00792096	0.0719912
YDR484W	0.0852879	0.619767	0.999031		YDR484W	-0.463903	5.7405e-05	8.76525e-05		YDR484W	-0.549191	1.64602e-05	2.72938e-05		YDR484W	0.344033	0.0150208	0.188915		YDR484W	0.258745	0.00804517	0.0727435
YGR146C	-0.0448337	0.774117	0.999031		YGR146C	-0.482012	6.00209e-06	9.75677e-06		YGR146C	-0.437178	0.000130812	0.000203061		YGR146C	0.198425	0.116453	0.49512		YGR146C	0.243258	0.00805325	0.0727435
YNL103W	-0.231663	0.0813664	0.835448		YNL103W	-0.727139	3.40303e-15	8.31644e-15		YNL103W	-0.495476	2.19964e-07	4.07339e-07		YNL103W	-0.0165154	0.87532	0.964749		YNL103W	0.215147	0.00804123	0.0727435
YHR216W	0.0940694	0.364324	0.999031		YHR216W	1.16094	4.84121e-57	3.30768e-56		YHR216W	1.06687	1.77219e-47	1.21657e-46		YHR216W	-0.09372	0.215663	0.6322		YHR216W	-0.187789	0.00805942	0.0727435
YBR233W-A	0.549804	0.0911639	#N/A		YBR233W-A	2.37158	4.7462e-25	1.56147e-24		YBR233W-A	1.82178	2.99843e-15	8.0333e-15		YBR233W-A	-0.0438724	0.852445	#N/A		YBR233W-A	-0.593677	0.00811354	0.0731058
YDR379W	-0.0163851	0.918695	0.999031		YDR379W	-0.340896	0.00175655	0.00242028		YDR379W	-0.324511	0.00590111	0.00795104		YDR379W	0.231884	0.0749294	0.409468		YDR379W	0.248269	0.00817201	0.0735059
YJR069C	0.244547	0.0674034	0.783433		YJR069C	3.50406	4.45633e-307	2.47969e-305		YJR069C	3.25951	3.85992e-255	2.0876e-253		YJR069C	-0.0193672	0.827618	0.961997		YJR069C	-0.263914	0.00820598	0.0736846
YLR301W	0.00412532	0.973184	0.999031		YLR301W	0.872625	6.86683e-24	2.18823e-23		YLR301W	0.8685	1.75504e-23	6.22713e-23		YLR301W	-0.217494	0.0151676	0.189076		YLR301W	-0.22162	0.00825185	0.0739694
YLR275W	0.937932	0.000929639	#N/A		YLR275W	3.29798	4.01301e-63	3.04368e-62		YLR275W	2.36005	5.53211e-31	2.45133e-30		YLR275W	0.392361	0.0427732	#N/A		YLR275W	-0.54557	0.00831425	0.0743708
YIL119C	-0.0335288	0.841394	0.999031		YIL119C	-0.371517	0.00108949	0.00152477		YIL119C	-0.337988	0.00601041	0.00809266		YIL119C	0.224153	0.0996796	0.469911		YIL119C	0.257682	0.00832509	0.0743708
YLR278C	-0.179277	0.180067	0.971926		YLR278C	-1.32051	4.2053e-46	2.33328e-45		YLR278C	-1.14123	2.66002e-32	1.22658e-31		YLR278C	0.0309783	0.772985	0.948585		YLR278C	0.210255	0.00834004	0.0743772
YDL204W	0.936059	0.00921379	#N/A		YDL204W	-1.72056	1.8671e-17	4.95866e-17		YDL204W	-2.65662	3.81418e-19	1.1791e-18		YDL204W	1.31042	7.23283e-05	#N/A		YDL204W	0.37436	0.00840771	0.074853
YNL110C	0.17783	0.214391	0.982177		YNL110C	3.18649	1.85763e-219	6.63585e-218		YNL110C	3.00866	4.98108e-192	1.84779e-190		YNL110C	-0.0949225	0.337108	0.746623		YNL110C	-0.272752	0.00847748	0.0753458
YJL033W	-0.127444	0.27492	0.999031		YJL033W	0.489297	3.04497e-09	5.82328e-09		YJL033W	0.616741	7.97725e-14	2.00714e-13		YJL033W	-0.334046	0.000110235	0.00837783		YJL033W	-0.206602	0.00849419	0.0753661
YMR318C	0.171786	0.10689	0.884702		YMR318C	1.29167	2.17312e-66	1.7346e-65		YMR318C	1.11988	1.31289e-49	9.50902e-49		YMR318C	-0.0227467	0.766811	0.946464		YMR318C	-0.194533	0.0085205	0.0754714
YLR337C	0.0271026	0.828072	0.999031		YLR337C	-0.987214	5.23196e-30	1.96351e-29		YLR337C	-1.01432	1.22835e-29	5.26551e-29		YLR337C	0.240779	0.0109706	0.162539		YLR337C	0.213677	0.00860179	0.075934
YMR251W-A	0.61247	0.00054451	0.0439568		YMR251W-A	5.21928	0	0		YMR251W-A	4.60681	1.58836e-293	1.06882e-291		YMR251W-A	0.253774	0.0245746	0.2466		YMR251W-A	-0.358697	0.00858934	0.075934
YDR341C	-0.0161097	0.861232	0.999031		YDR341C	0.433837	2.60187e-11	5.46733e-11		YDR341C	0.449947	5.4075e-12	1.26591e-11		YDR341C	-0.183829	0.00564284	0.105265		YDR341C	-0.16772	0.00865959	0.0761869
YKR074W	0.201785	0.140118	0.927907		YKR074W	1.22188	1.87342e-37	8.49647e-37		YKR074W	1.02009	1.95576e-25	7.37328e-25		YKR074W	-0.0346946	0.736049	0.931467		YKR074W	-0.23648	0.00865266	0.0761869
YGL048C	0.169597	0.120389	0.899216		YGL048C	1.23123	6.75767e-58	4.68343e-57		YGL048C	1.06163	1.53607e-42	9.42657e-42		YGL048C	-0.0270704	0.733242	0.930159		YGL048C	-0.196667	0.00867497	0.0761939
YPL244C	0.128699	0.481989	0.999031		YPL244C	-1.51253	1.47491e-32	5.89863e-32		YPL244C	-1.64123	9.81294e-36	5.00771e-35		YPL244C	-0.115507	0.463366	0.817565		YPL244C	-0.244206	0.00881607	0.0773033
YDR166C	-0.170052	0.192927	0.977774		YDR166C	-0.626557	3.92229e-12	8.5108e-12		YDR166C	-0.456504	1.32062e-06	2.33428e-06		YDR166C	0.0353956	0.734606	0.930742		YDR166C	0.205448	0.00884151	0.0773965
YPR158W-A	-0.0992549	0.340605	0.999031		YPR158W-A	-2.39192	4.26935e-232	1.63621e-230		YPR158W-A	-2.29266	4.15372e-212	1.75457e-210		YPR158W-A	-0.26708	0.00113237	0.0368831		YPR158W-A	-0.167826	0.00890536	0.0776952
YAR075W	0.379985	0.101799	0.876464		YAR075W	3.0903	1.38947e-79	1.4033e-78		YAR075W	2.71032	9.42794e-61	8.53826e-60		YAR075W	-0.0622038	0.696109	0.913044		YAR075W	-0.442189	0.0088947	0.0776952
YGL070C	0.245237	0.125554	0.908154		YGL070C	3.06221	9.58702e-164	2.34093e-162		YGL070C	2.81697	1.4328e-134	3.3982e-133		YGL070C	-0.0591933	0.59013	0.868374		YGL070C	-0.30443	0.00892127	0.0777043
YDR089W	-0.0974555	0.515989	0.999031		YDR089W	-0.924763	4.64334e-19	1.2894e-18		YDR089W	-0.827308	2.39284e-14	6.15164e-14		YDR089W	0.145027	0.218688	0.635634		YDR089W	0.242482	0.00896743	0.0777536
YLR086W	-0.260784	0.160005	0.951618		YLR086W	0.740183	7.00469e-09	1.31483e-08		YLR086W	1.00097	1.02299e-13	2.56279e-13		YLR086W	0.0520917	0.713432	0.920036		YLR086W	0.312875	0.00895711	0.0777536
YJL141C	0.22775	0.109647	0.884702		YJL141C	-1.03803	1.27968e-27	4.52108e-27		YJL141C	-1.26578	5.10575e-33	2.4061e-32		YJL141C	0.438353	0.000187471	0.0120216		YJL141C	0.210603	0.00897157	0.0777536
YHR118C	-0.33201	0.081475	0.835448		YHR118C	1.07256	2.32838e-16	5.94893e-16		YHR118C	1.40457	4.06122e-24	1.46889e-23		YHR118C	-0.0093965	0.948348	0.985155		YHR118C	0.322613	0.00905181	0.0783192
YOR375C	0.0335232	0.704454	0.999031		YOR375C	0.925079	1.13797e-49	6.81017e-49		YOR375C	0.891556	4.29345e-46	2.83632e-45		YOR375C	-0.128292	0.0415406	0.30773		YOR375C	-0.161815	0.00909471	0.0785602
YKR095W-A	0.313677	0.122122	0.900048		YKR095W-A	2.69067	7.68844e-80	7.80579e-79		YKR095W-A	2.377	1.3026e-60	1.17234e-59		YKR095W-A	-0.0632234	0.656939	0.900048		YKR095W-A	-0.3769	0.00914381	0.078854
YDR084C	0.218908	0.203724	0.982177		YDR084C	0.237723	0.0479081	0.0580251		YDR084C	0.0188149	0.878794	0.891594		YDR084C	-0.0578216	0.669545	0.904252		YDR084C	-0.27673	0.0092563	0.0796926
YGR089W	-0.314431	0.0582718	0.747766		YGR089W	-1.58095	6.23028e-43	3.22204e-42		YGR089W	-1.26651	3.58685e-26	1.38104e-25		YGR089W	-0.0805418	0.563829	0.856298		YGR089W	0.233889	0.00934394	0.0801829
YKL103C	0.120431	0.374566	0.999031		YKL103C	0.800902	1.385e-17	3.69694e-17		YKL103C	0.680471	3.71016e-12	8.74569e-12		YKL103C	0.356493	0.000402409	0.0194293		YKL103C	0.236062	0.00932925	0.0801829
YDL106C	0.0195496	0.901331	0.999031		YDL106C	-0.0724032	0.502659	0.533287		YDL106C	-0.0919528	0.423459	0.4576		YDL106C	0.275624	0.0250954	0.248772		YDL106C	0.256074	0.00940467	0.0803085
YER094C	0.204152	0.0798313	0.834002		YER094C	1.22482	1.03617e-50	6.32525e-50		YER094C	1.02067	1.00597e-34	4.96719e-34		YER094C	-0.00191396	0.982113	0.994374		YER094C	-0.206066	0.00940206	0.0803085
YIL148W	0.156804	0.121976	0.900048		YIL148W	1.13902	6.71919e-57	4.58537e-56		YIL148W	0.982211	1.13174e-42	6.97483e-42		YIL148W	-0.0288582	0.688185	0.910481		YIL148W	-0.185663	0.00939189	0.0803085
YFR017C	0.82169	0.0250799	#N/A		YFR017C	0.581346	0.00887571	0.0114933		YFR017C	-0.240344	0.41024	0.444664		YFR017C	1.35277	8.86912e-06	#N/A		YFR017C	0.531084	0.00942072	0.0803143
YDR304C	0.0587078	0.567632	0.999031		YDR304C	1.31035	1.67723e-73	1.50951e-72		YDR304C	1.25164	7.02497e-66	6.99716e-65		YDR304C	-0.123549	0.0990825	0.469555		YDR304C	-0.182256	0.009508	0.0809214
YBR149W	-0.0366651	0.731522	0.999031		YBR149W	0.551525	1.07756e-13	2.49235e-13		YBR149W	0.58819	2.00698e-14	5.17576e-14		YBR149W	0.146647	0.0672321	0.388074		YBR149W	0.183312	0.0095229	0.0809214
YML028W	0.129937	0.217057	0.982177		YML028W	1.12679	7.59366e-52	4.74563e-51		YML028W	0.996855	7.64664e-41	4.47886e-40		YML028W	-0.0620934	0.406201	0.788676		YML028W	-0.19203	0.00956186	0.0810116
YJR138W	-0.461084	0.0137218	0.358381		YJR138W	-1.48726	5.93669e-30	2.2251e-29		YJR138W	-1.02618	1.69629e-14	4.39215e-14		YJR138W	-0.1981	0.207524	0.624465		YJR138W	0.262983	0.00956451	0.0810116
YIR032C	-0.202608	0.444371	#N/A		YIR032C	-0.643826	0.000777169	0.00109882		YIR032C	-0.441217	0.0158875	0.0205777		YIR032C	-0.575062	0.00973768	#N/A		YIR032C	-0.372454	0.0096087	0.0812541
YDR361C	0.0814074	0.520473	0.999031		YDR361C	0.913723	9.94168e-25	3.24676e-24		YDR361C	0.832315	2.65033e-20	8.53503e-20		YDR361C	-0.136498	0.149189	0.541832		YDR361C	-0.217906	0.00967057	0.0816453
YIR012W	0.0248271	0.829412	0.999031		YIR012W	0.470504	6.92246e-09	1.29981e-08		YIR012W	0.445676	4.96669e-08	9.4765e-08		YIR012W	-0.176885	0.0369776	0.291931		YIR012W	-0.201712	0.00973053	0.082019
YGR240C	-0.0362497	0.657087	0.999031		YGR240C	-0.0553184	0.337704	0.366866		YGR240C	-0.0190687	0.741368	0.764622		YGR240C	-0.183935	0.0016074	0.0471056		YGR240C	-0.147685	0.00977722	0.0822798
YBR220C	0.0264658	0.869027	0.999031		YBR220C	-0.679559	1.63255e-09	3.15973e-09		YBR220C	-0.706025	6.52344e-10	1.38078e-09		YBR220C	-0.207877	0.116308	0.49512		YBR220C	-0.234343	0.00983289	0.0825434
YKL121W	-0.00251073	0.991781	0.999505		YKL121W	-1.87251	4.37462e-31	1.68773e-30		YKL121W	-1.87	1.27058e-24	4.66256e-24		YKL121W	0.297997	0.16405	0.5569		YKL121W	0.300508	0.00984014	0.0825434
YNL313C	-0.0199515	0.864116	0.999031		YNL313C	-0.562125	7.87985e-12	1.68829e-11		YNL313C	-0.542173	5.5225e-11	1.23155e-10		YNL313C	-0.215372	0.0150645	0.188915		YNL313C	-0.19542	0.00990565	0.0829599
YOR116C	-0.0851265	0.430428	0.999031		YOR116C	-0.970507	4.06226e-37	1.82802e-36		YOR116C	-0.885381	5.0831e-31	2.25755e-30		YOR116C	-0.267204	0.00106702	0.0364921		YOR116C	-0.182078	0.00993842	0.0831011
YOL069W	-0.100625	0.651535	0.999031		YOL069W	-0.402728	0.00734656	0.00958614		YOL069W	-0.302103	0.066343	0.0803026		YOL069W	0.222068	0.227877	#N/A		YOL069W	0.322693	0.0100769	0.0839227
YLL015W	0.0910089	0.460817	0.999031		YLL015W	-0.415459	1.52984e-06	2.57809e-06		YLL015W	-0.506468	8.9385e-09	1.78124e-08		YLL015W	-0.106578	0.269807	0.690328		YLL015W	-0.197587	0.0101003	0.0839227
YLR373C	-0.0708842	0.59698	0.999031		YLR373C	-0.926654	7.79844e-24	2.47557e-23		YLR373C	-0.85577	1.61969e-18	4.89716e-18		YLR373C	0.131996	0.223422	0.639598		YLR373C	0.20288	0.010085	0.0839227
YML130C	-0.127487	0.287754	0.999031		YML130C	0.686842	2.30755e-16	5.89831e-16		YML130C	0.814329	2.47437e-21	8.25314e-21		YML130C	0.0805266	0.36319	0.75973		YML130C	0.208014	0.0101009	0.0839227
YNL100W	0.0682664	0.703207	0.999031		YNL100W	1.49638	7.84672e-35	3.31937e-34		YNL100W	1.42811	2.04908e-27	8.19492e-27		YNL100W	0.374088	0.00512581	0.0987622		YNL100W	0.305821	0.0103913	0.0861979
YDR251W	-0.124762	0.325394	0.999031		YDR251W	-1.17296	1.20614e-40	5.85563e-40		YDR251W	-1.0482	2.21753e-30	9.65601e-30		YDR251W	0.0732458	0.466537	0.81815		YDR251W	0.198008	0.0104188	0.0862894
YOL064C	0.0568228	0.628894	0.999031		YOL064C	0.879887	2.16832e-26	7.39425e-26		YOL064C	0.823064	6.39012e-23	2.22367e-22		YOL064C	-0.147162	0.0886799	0.442573		YOL064C	-0.203985	0.0104821	0.0865397
YGR148C	0.197928	0.0897555	0.838129		YGR148C	2.76215	3.1554e-246	1.29506e-244		YGR148C	2.56423	8.06024e-212	3.38004e-210		YGR148C	-0.0133888	0.870953	0.964392		YGR148C	-0.211316	0.010477	0.0865397
YER057C	0.222347	0.0581922	0.747766		YER057C	2.34649	9.47202e-179	2.52602e-177		YER057C	2.12414	3.88229e-142	9.51984e-141		YER057C	0.0114531	0.891004	0.972587		YER057C	-0.210894	0.0105019	0.0865663
YDR122W	-0.0519473	0.692664	0.999031		YDR122W	-1.03456	2.68308e-30	1.01219e-29		YDR122W	-0.982613	6.75657e-25	2.50643e-24		YDR122W	0.149441	0.155419	0.549402		YDR122W	0.201388	0.0105931	0.0870432
YHR071W	0.0793529	0.722953	0.999031		YHR071W	-2.60201	1.41243e-61	1.04657e-60		YHR071W	-2.68137	1.67185e-63	1.58606e-62		YHR071W	-0.211873	0.271479	0.690731		YHR071W	-0.291226	0.0105833	0.0870432
YMR051C	-0.221462	0.055371	0.732443		YMR051C	-3.14456	0	0		YMR051C	-2.9231	5.08066e-283	3.06268e-281		YMR051C	-0.396235	2.10739e-05	0.00196562		YMR051C	-0.174774	0.0106373	0.0870682
YBL101C	-0.0634819	0.634302	0.999031		YBL101C	-1.70749	5.83695e-78	5.73487e-77		YBL101C	-1.64401	4.61737e-64	4.44604e-63		YBL101C	0.126251	0.254898	0.674095		YBL101C	0.189733	0.0106128	0.0870682
YNL079C	0.129471	0.183928	0.973352		YNL079C	2.44306	8.46247e-278	4.01413e-276		YNL079C	2.31358	4.38208e-245	2.18613e-243		YNL079C	-0.0462338	0.502662	0.833174		YNL079C	-0.175705	0.0106794	0.0870682
YCR016W	0.087706	0.518647	0.999031		YCR016W	1.76916	6.46039e-77	6.16935e-76		YCR016W	1.68146	1.66093e-67	1.6982e-66		YCR016W	-0.147894	0.138204	0.523722		YCR016W	-0.2356	0.0106656	0.0870682
YAL024C	-0.235633	0.161995	0.951618		YAL024C	-1.15271	3.3126e-23	1.03622e-22		YAL024C	-0.917078	5.75893e-14	1.46171e-13		YAL024C	0.00666464	0.961826	0.990299		YAL024C	0.242298	0.0106653	0.0870682
YBR132C	-0.0377195	0.868039	0.999031		YBR132C	-0.761797	6.08033e-07	1.04567e-06		YBR132C	-0.724077	1.62982e-05	2.70329e-05		YBR132C	0.285495	0.129617	0.514862		YBR132C	0.323215	0.0107464	0.0874774
YDR309C	-0.0324923	0.762897	0.999031		YDR309C	-0.782863	1.11023e-25	3.72459e-25		YDR309C	-0.75037	3.88373e-22	1.32441e-21		YDR309C	0.141811	0.088384	0.442573		YDR309C	0.174303	0.0107882	0.0875883
YOR124C	-0.219641	0.0881392	0.838129		YOR124C	-0.224947	0.0124037	0.0158106		YOR124C	-0.00530659	0.95409	0.959228		YOR124C	-0.00536346	0.956172	0.988163		YOR124C	0.214277	0.0107935	0.0875883
YOR145C	0.041619	0.744452	0.999031		YOR145C	0.75517	5.01396e-17	1.31353e-16		YOR145C	0.713551	3.19834e-15	8.5412e-15		YOR145C	-0.180948	0.0520058	0.347609		YOR145C	-0.222567	0.0108349	0.087788
YDR381W	0.173757	0.0503992	0.699192		YDR381W	1.54532	4.37409e-135	8.55165e-134		YDR381W	1.37156	1.07515e-104	1.86844e-103		YDR381W	0.0167573	0.793051	0.955932		YDR381W	-0.157	0.0109394	0.0884978
YPR074C	-0.014504	0.877574	0.999031		YPR074C	-0.833292	5.64469e-36	2.46535e-35		YPR074C	-0.818788	9.93982e-35	4.91219e-34		YPR074C	-0.182361	0.0066274	0.11629		YPR074C	-0.167857	0.0109576	0.0885075
YML120C	0.0394458	0.777827	0.999031		YML120C	0.254715	0.00867912	0.0112539		YML120C	0.215269	0.0324093	0.040631		YML120C	0.275663	0.0083282	0.136716		YML120C	0.236218	0.0109944	0.088668
YLR442C	0.0115074	0.947301	0.999031		YLR442C	0.327179	0.0055934	0.0073885		YLR442C	0.315672	0.0136071	0.0177313		YLR442C	0.282889	0.0396149	0.29886		YLR442C	0.271382	0.0110706	0.089145
YDR035W	0.0745097	0.528247	0.999031		YDR035W	1.07715	3.06255e-38	1.41897e-37		YDR035W	1.00264	5.14941e-33	2.4247e-32		YDR035W	-0.132902	0.119304	0.497584		YDR035W	-0.207412	0.0111449	0.0896053
YDR046C	0.204024	0.0607212	0.753921		YDR046C	0.375553	7.99433e-07	1.36591e-06		YDR046C	0.171529	0.0273556	0.0345497		YDR046C	0.0223725	0.784717	0.953341		YDR046C	-0.181652	0.0111777	0.0897305
YDR224C	0.132913	0.211872	0.982177		YDR224C	1.57894	5.00252e-98	6.47642e-97		YDR224C	1.44603	6.26205e-82	8.25478e-81		YDR224C	-0.0565621	0.455799	0.812598		YDR224C	-0.189476	0.0112143	0.0898864
YCR042C	-0.0943552	0.489999	0.999031		YCR042C	-0.545706	6.3294e-09	1.19078e-08		YCR042C	-0.45135	5.44755e-06	9.30764e-06		YCR042C	0.112389	0.305328	0.718763		YCR042C	0.206744	0.011308	0.0904988
YLR135W	-0.337597	0.167927	#N/A		YLR135W	-0.500732	0.00284208	0.00385721		YLR135W	-0.163135	0.360212	0.393533		YLR135W	0.0124998	0.950667	#N/A		YLR135W	0.350097	0.0113532	0.0907213
YOL113W	-0.130805	0.566909	0.999031		YOL113W	-1.8438	4.73112e-33	1.91061e-32		YOL113W	-1.713	3.30292e-24	1.19837e-23		YOL113W	0.149653	0.453669	0.81056		YOL113W	0.280458	0.0114267	0.091169
YGL202W	0.0241481	0.796325	0.999031		YGL202W	-0.183967	0.00534042	0.00706562		YGL202W	-0.208115	0.00168789	0.00240646		YGL202W	-0.139282	0.0393812	0.297644		YGL202W	-0.16343	0.0115013	0.091625
YLR049C	0.0782643	0.575945	0.999031		YLR049C	-0.0590031	0.535479	0.565787		YLR049C	-0.137267	0.180656	0.207473		YLR049C	0.293311	0.00825598	0.136623		YLR049C	0.215047	0.0115448	0.0916737
YMR199W	-0.172378	0.186567	0.976319		YMR199W	-1.24463	3.66635e-43	1.90459e-42		YMR199W	-1.07225	4.86915e-30	2.10282e-29		YMR199W	0.0224978	0.830745	0.961997		YMR199W	0.194875	0.0115523	0.0916737
YNL274C	0.202137	0.261516	0.993267		YNL274C	0.711766	3.40516e-09	6.49066e-09		YNL274C	0.509628	0.000139997	0.00021668		YNL274C	0.483744	0.000619796	0.0242252		YNL274C	0.281607	0.0115601	0.0916737
YLR293C	0.13255	0.152168	0.942857		YLR293C	0.390198	2.3784e-09	4.57574e-09		YLR293C	0.257648	8.46769e-05	0.000133231		YLR293C	-0.0310349	0.638664	0.890311		YLR293C	-0.163585	0.0116022	0.0917292
YCL040W	0.112514	0.694161	0.999031		YCL040W	0.317027	0.115866	0.13405		YCL040W	0.204513	0.313796	0.346289		YCL040W	0.619536	0.0023657	0.061176		YCL040W	0.507022	0.0115922	0.0917292
YDL126C	0.105838	0.221001	0.982177		YDL126C	0.883436	1.74374e-47	9.91262e-47		YDL126C	0.777598	6.54208e-37	3.47331e-36		YDL126C	-0.0464828	0.452287	0.8095		YDL126C	-0.152321	0.0117352	0.0917704
YOL141W	0.0776425	0.671077	0.999031		YOL141W	-0.127806	0.319158	0.348419		YOL141W	-0.205449	0.114739	0.135179		YOL141W	-0.192712	0.193144	0.609272		YOL141W	-0.270355	0.0116872	0.0917704
YOL004W	-0.0491539	0.628809	0.999031		YOL004W	-1.01106	9.93006e-46	5.44695e-45		YOL004W	-0.961908	4.1794e-40	2.39467e-39		YOL004W	0.122391	0.105197	0.482378		YOL004W	0.171545	0.0117233	0.0917704
YOR117W	0.220631	0.027373	0.502346		YOR117W	1.22484	2.00139e-68	1.6617e-67		YOR117W	1.00421	5.58097e-45	3.60458e-44		YOR117W	0.0490107	0.503751	0.833174		YOR117W	-0.17162	0.0116426	0.0917704
YMR268C	-0.517823	0.0204497	0.445884		YMR268C	0.292011	0.0593006	0.0709915		YMR268C	0.809833	4.9284e-07	8.92739e-07		YMR268C	-0.175381	0.322563	#N/A		YMR268C	0.342442	0.0117463	0.0917704
YBR011C	0.0467222	0.622743	0.999031		YBR011C	0.705083	7.97872e-26	2.68603e-25		YBR011C	0.658361	1.16818e-22	4.04322e-22		YBR011C	-0.121445	0.0723592	0.402375		YBR011C	-0.168167	0.0117154	0.0917704
YNL002C	0.0969163	0.402801	0.999031		YNL002C	1.77917	1.46106e-105	2.08255e-104		YNL002C	1.68226	6.88094e-93	1.04514e-91		YNL002C	-0.105888	0.203769	0.622055		YNL002C	-0.202804	0.0117391	0.0917704
YKL117W	0.0630763	0.570934	0.999031		YKL117W	1.77968	8.81635e-114	1.35692e-112		YKL117W	1.71661	6.37389e-105	1.11437e-103		YKL117W	-0.133188	0.0939225	0.456163		YKL117W	-0.196264	0.0117479	0.0917704
YNL162W-A	1.14183	0.00994102	#N/A		YNL162W-A	3.63964	5.81961e-31	2.23478e-30		YNL162W-A	2.49781	1.14717e-15	3.11821e-15		YNL162W-A	0.307119	0.295513	#N/A		YNL162W-A	-0.834714	0.0118445	0.0923867
YNL102W	0.0219721	0.850267	0.999031		YNL102W	-0.467558	6.18378e-09	1.16451e-08		YNL102W	-0.48953	5.88083e-09	1.18538e-08		YNL102W	0.207654	0.0209689	0.22357		YNL102W	0.185681	0.0119416	0.0928728
YJL061W	-0.247604	0.0661034	0.774404		YJL061W	-0.490089	1.68001e-07	2.97315e-07		YJL061W	-0.242485	0.0122797	0.0160593		YJL061W	-0.0390266	0.713144	0.920036		YJL061W	0.208577	0.0119423	0.0928728
YDR328C	0.168065	0.109667	0.884702		YDR328C	0.858969	1.93357e-31	7.55032e-31		YDR328C	0.690903	2.96561e-20	9.51856e-20		YDR328C	-0.00900127	0.907973	0.974827		YDR328C	-0.177066	0.0120528	0.0935925
YLR146C	0.149137	0.398723	0.999031		YLR146C	0.13951	0.259094	0.286662		YLR146C	-0.00962694	0.939236	0.945609		YLR146C	-0.12087	0.388481	0.781133		YLR146C	-0.270007	0.0121253	0.0935995
YLR172C	0.11378	0.28567	0.999031		YLR172C	0.124811	0.095448	0.111565		YLR172C	0.0110313	0.884368	0.896765		YLR172C	-0.0642124	0.419401	0.79246		YLR172C	-0.177992	0.0121071	0.0935995
YBR084C-A	0.193346	0.0797166	0.834002		YBR084C-A	0.94601	7.16961e-34	2.95517e-33		YBR084C-A	0.752664	5.31576e-22	1.80424e-21		YBR084C-A	-0.00183885	0.98125	0.994374		YBR084C-A	-0.195185	0.0121073	0.0935995
YHR214C-C	-0.117612	0.294513	0.999031		YHR214C-C	-2.4709	5.02072e-213	1.65085e-211		YHR214C-C	-2.35328	2.69009e-193	1.01088e-191		YHR214C-C	-0.297796	0.000550405	0.0228168		YHR214C-C	-0.180184	0.0121162	0.0935995
YNR027W	-0.0558622	0.773757	0.999031		YNR027W	-0.291036	0.0345674	0.0423637		YNR027W	-0.235174	0.0863045	0.103042		YNR027W	-0.340509	0.0307716	0.267556		YNR027W	-0.284647	0.0122451	0.0943845
YDR145W	-0.0973809	0.405947	0.999031		YDR145W	0.530953	7.9027e-11	1.63157e-10		YDR145W	0.628334	7.64676e-14	1.9265e-13		YDR145W	0.0983933	0.259496	0.677653		YDR145W	0.195774	0.0123048	0.094681
YGL141W	-0.169955	0.287542	0.999031		YGL141W	-1.01811	1.77902e-20	5.17605e-20		YGL141W	-0.848156	2.81003e-13	6.91691e-13		YGL141W	0.0560343	0.670844	0.904252		YGL141W	0.22599	0.0123198	0.094681
YDR137W	-0.0543634	0.759145	0.999031		YDR137W	-0.467792	0.000102838	0.000154538		YDR137W	-0.413428	0.00148639	0.00212967		YDR137W	0.201473	0.164081	0.5569		YDR137W	0.255836	0.0124249	0.0952158
YBR127C	0.0917717	0.410852	0.999031		YBR127C	0.245836	0.00181898	0.00250272		YBR127C	0.154064	0.0510856	0.0626871		YBR127C	-0.103766	0.192296	0.608932		YBR127C	-0.195538	0.0124258	0.0952158
YDL178W	0.129625	0.325485	0.999031		YDL178W	0.992703	5.83597e-27	2.02353e-26		YDL178W	0.863078	4.6442e-20	1.48241e-19		YDL178W	-0.0866219	0.382984	0.776947		YDL178W	-0.216247	0.0126503	0.0965714
YDR531W	0.236153	0.0944099	0.851992		YDR531W	-0.153418	0.118016	0.136347		YDR531W	-0.389571	0.000123965	0.000192897		YDR531W	0.0197198	0.859434	0.963777		YDR531W	-0.216434	0.0126581	0.0965714
YBR121C	0.00685888	0.936751	0.999031		YBR121C	-0.216127	0.000395884	0.000574613		YBR121C	-0.222985	0.000270839	0.000410408		YBR121C	-0.141959	0.0231986	0.236833		YBR121C	-0.148818	0.0126275	0.0965714
YOR272W	0.0869052	0.462614	0.999031		YOR272W	0.655535	3.36671e-15	8.23115e-15		YOR272W	0.56863	1.35799e-11	3.10744e-11		YOR272W	-0.111845	0.200554	0.618853		YOR272W	-0.19875	0.0127105	0.0966046
YMR116C	0.00156136	0.986843	0.9991		YMR116C	0.628703	5.8409e-21	1.72544e-20		YMR116C	0.627141	7.57824e-21	2.4805e-20		YMR116C	-0.164855	0.0140236	0.18387		YMR116C	-0.166416	0.0127179	0.0966046
YBR085W	0.0302384	0.925658	#N/A		YBR085W	2.21554	1.94545e-21	5.82127e-21		YBR085W	2.1853	2.92456e-22	1.00442e-21		YBR085W	-0.530073	0.0231291	#N/A		YBR085W	-0.560312	0.012703	0.0966046
YLR435W	0.262604	0.17301	0.960523		YLR435W	4.83415	3.55436e-276	1.64553e-274		YLR435W	4.57154	3.19169e-246	1.6202e-244		YLR435W	-0.13246	0.226163	0.642334		YLR435W	-0.395064	0.0127589	0.0967749
YER087C-B	0.336178	0.0260774	0.490608		YER087C-B	1.89822	1.71824e-72	1.52041e-71		YER087C-B	1.56204	3.25863e-47	2.21855e-46		YER087C-B	0.0792615	0.472591	0.818542		YER087C-B	-0.256916	0.0127915	0.0968821
YER165W	0.043412	0.61456	0.999031		YER165W	0.655536	5.30205e-27	1.83951e-26		YER165W	0.612124	1.06064e-23	3.78417e-23		YER165W	-0.107533	0.0791304	0.419669		YER165W	-0.150945	0.0128433	0.097133
YER043C	0.0124219	0.89206	0.999031		YER043C	0.592271	5.4586e-20	1.56847e-19		YER043C	0.57985	3.43952e-19	1.06727e-18		YER043C	-0.14776	0.0231092	0.236833		YER043C	-0.160182	0.0128856	0.0973122
YLR325C	0.122114	0.250855	0.986566		YLR325C	1.7616	1.42677e-121	2.44282e-120		YLR325C	1.63949	3.33641e-105	5.85084e-104		YLR325C	-0.0642442	0.394285	0.784746		YLR325C	-0.186358	0.0129381	0.0975682
YOR058C	-0.174907	0.22888	0.982177		YOR058C	-0.486142	1.23366e-06	2.09238e-06		YOR058C	-0.311234	0.00311396	0.00431421		YOR058C	0.0398173	0.733364	0.930159		YOR058C	0.214725	0.0129655	0.0976339
YLR384C	-0.103817	0.300204	0.999031		YLR384C	-0.740457	1.30678e-25	4.37382e-25		YLR384C	-0.636639	2.83445e-19	8.82355e-19		YLR384C	-0.270074	0.000291612	0.0163942		YLR384C	-0.166256	0.0130348	0.0978737
YBR031W	0.144866	0.112149	0.889162		YBR031W	1.74145	9.6767e-161	2.31401e-159		YBR031W	1.59658	2.92353e-135	6.96232e-134		YBR031W	-0.0150999	0.815019	0.959176		YBR031W	-0.159966	0.0130224	0.0978737
YKL045W	-0.142496	0.359118	0.999031		YKL045W	0.758314	1.1988e-12	2.66517e-12		YKL045W	0.90081	1.5101e-15	4.08363e-15		YKL045W	0.104239	0.382725	0.776947		YKL045W	0.246735	0.0130718	0.0980101
YDL168W	0.0318982	0.786253	0.999031		YDL168W	2.34672	6.69894e-177	1.73842e-175		YDL168W	2.31482	8.97548e-169	2.82289e-167		YDL168W	-0.173492	0.0376571	0.291931		YDL168W	-0.20539	0.0132083	0.0987502
YNL111C	0.0839568	0.48139	0.999031		YNL111C	2.8125	1.07754e-246	4.48612e-245		YNL111C	2.72855	3.43657e-227	1.59099e-225		YNL111C	-0.127391	0.126411	0.512386		YNL111C	-0.211348	0.013199	0.0987502
YGL036W	-0.221129	0.140017	0.927907		YGL036W	-1.84903	1.56672e-71	1.36545e-70		YGL036W	-1.6279	6.41384e-51	4.7831e-50		YGL036W	-0.0241502	0.849154	0.962932		YGL036W	0.196979	0.0132972	0.099273
YBR244W	0.600374	0.0184342	#N/A		YBR244W	2.60367	5.49052e-49	3.22903e-48		YBR244W	2.00329	7.93385e-28	3.21521e-27		YBR244W	0.160253	0.379434	#N/A		YBR244W	-0.440121	0.0133663	0.0996465
YHR163W	0.055618	0.639027	0.999031		YHR163W	0.148576	0.0743636	0.088221		YHR163W	0.0929577	0.270832	0.302276		YHR163W	-0.134316	0.136927	0.521355		YHR163W	-0.189934	0.0134411	0.100061
YGL031C	0.208781	0.0423488	0.643933		YGL031C	1.72603	9.98085e-125	1.74499e-123		YGL031C	1.51725	1.6276e-96	2.60191e-95		YGL031C	0.0294939	0.685745	0.908424		YGL031C	-0.179287	0.0134685	0.100123
YNL031C	0.121258	0.205228	0.982177		YNL031C	2.11754	1.16966e-215	4.02906e-214		YNL031C	1.99629	1.73325e-190	6.26894e-189		YNL031C	-0.0453049	0.504549	0.833174		YNL031C	-0.166563	0.0135736	0.100761
YGR061C	0.00306103	0.97338	0.999031		YGR061C	-0.868577	4.71017e-41	2.32376e-40		YGR061C	-0.871638	5.28091e-41	3.1026e-40		YGR061C	-0.151702	0.0233578	0.237278		YGR061C	-0.154763	0.0136642	0.101003
YNL233W	-0.188428	0.171133	0.958285		YNL233W	0.11284	0.238179	0.265065		YNL233W	0.301267	0.00234613	0.00329781		YNL233W	0.0299392	0.776447	0.948977		YNL233W	0.218367	0.0136506	0.101003
YJL134W	0.105076	0.460928	0.999031		YJL134W	0.0652341	0.512766	0.543276		YJL134W	-0.039842	0.695703	0.722029		YJL134W	-0.11135	0.321439	0.732654		YJL134W	-0.216426	0.0136302	0.101003
YAR073W	0.153491	0.276551	0.999031		YAR073W	4.30491	0	0		YAR073W	4.15142	0	0		YAR073W	-0.120299	0.16658	0.560878		YAR073W	-0.27379	0.0136962	0.101097
YPL230W	0.229666	0.54375	#N/A		YPL230W	-0.985173	4.34454e-05	6.69201e-05		YPL230W	-1.21484	3.09456e-05	5.02758e-05		YPL230W	0.702102	0.0312282	#N/A		YPL230W	0.472436	0.0138607	0.102023
YFL022C	0.0217366	0.81593	0.999031		YFL022C	0.724271	4.42979e-28	1.58144e-27		YFL022C	0.702534	2.32552e-26	8.98984e-26		YFL022C	-0.138444	0.038672	0.295549		YFL022C	-0.160181	0.0138497	0.102023
YIL114C	-0.0375055	0.835406	0.999031		YIL114C	-0.40808	0.00137599	0.00191139		YIL114C	-0.370574	0.00372033	0.0051212		YIL114C	-0.296845	0.042748	0.311612		YIL114C	-0.25934	0.0139204	0.102318
YDR482C	0.666356	0.0717519	#N/A		YDR482C	2.94798	2.06807e-29	7.63749e-29		YDR482C	2.28162	2.68126e-18	8.02713e-18		YDR482C	0.0122658	0.961964	#N/A		YDR482C	-0.654091	0.0139537	0.102419
YKL164C	-0.0401362	0.701075	0.999031		YKL164C	0.835295	1.11216e-29	4.13364e-29		YKL164C	0.875432	2.94426e-32	1.35548e-31		YKL164C	0.140651	0.0582319	0.366531		YKL164C	0.180787	0.0140365	0.102882
YGR161C-C	-0.17011	0.142725	0.927907		YGR161C-C	-3.22229	0	0		YGR161C-C	-3.05218	4.82566e-304	3.53495e-302		YGR161C-C	-0.337009	0.000337112	0.0174641		YGR161C-C	-0.166899	0.0142002	0.10386
YNL207W	0.128542	0.334617	0.999031		YNL207W	0.878561	4.34721e-21	1.28946e-20		YNL207W	0.750019	3.25246e-15	8.67772e-15		YNL207W	-0.0840609	0.405916	0.788676		YNL207W	-0.212603	0.0142096	0.10386
YJL208C	0.106635	0.462884	0.999031		YJL208C	0.568437	2.28807e-08	4.20085e-08		YJL208C	0.461802	8.46549e-06	1.42994e-05		YJL208C	-0.119399	0.287102	0.707244		YJL208C	-0.226034	0.0143279	0.104578
YOR377W	0.00114387	0.994947	0.999505		YOR377W	-0.650935	3.10696e-07	5.40914e-07		YOR377W	-0.652078	3.65528e-07	6.6687e-07		YOR377W	-0.250588	0.0913194	0.448347		YOR377W	-0.251732	0.0144612	0.105403
YDR233C	-0.00348249	0.970992	0.999031		YDR233C	-0.247935	0.000246038	0.000361285		YDR233C	-0.244452	0.000312167	0.000470445		YDR233C	-0.16565	0.0164562	0.194629		YDR233C	-0.162168	0.014514	0.105641
YML063W	-0.0159981	0.866891	0.999031		YML063W	0.183707	0.0064785	0.00850137		YML063W	0.199705	0.00309397	0.00428858		YML063W	-0.180325	0.00773968	0.13168		YML063W	-0.164327	0.0145793	0.105968
YKR035W-A	0.277962	0.0971859	0.865372		YKR035W-A	3.57925	2.23061e-204	6.94007e-203		YKR035W-A	3.30129	1.4558e-167	4.52941e-166		YKR035W-A	-0.0313401	0.774931	0.948585		YKR035W-A	-0.309302	0.0146914	0.106635
YGL013C	-0.117139	0.427304	0.999031		YGL013C	-1.4189	2.41022e-44	1.27612e-43		YGL013C	-1.30176	5.00196e-34	2.43451e-33		YGL013C	0.0910786	0.449216	0.809039		YGL013C	0.208218	0.0147353	0.106805
YLR247C	-0.313961	0.0843713	0.838129		YLR247C	-1.69451	3.11817e-41	1.54362e-40		YLR247C	-1.38054	6.92172e-26	2.64396e-25		YLR247C	-0.077895	0.612998	0.881669		YLR247C	0.236066	0.0147699	0.106908
YGR203W	0.579318	0.0217753	0.449997		YGR203W	3.90937	3.13854e-107	4.52936e-106		YGR203W	3.33005	6.08607e-77	7.36822e-76		YGR203W	0.101513	0.522774	#N/A		YGR203W	-0.477805	0.0149239	0.107873
YGL210W	0.341846	0.0645274	0.771169		YGL210W	2.54015	1.91237e-86	2.14891e-85		YGL210W	2.19831	1.00008e-61	9.17185e-61		YGL210W	0.025777	0.844534	0.962199		YGL210W	-0.316069	0.0151038	0.108877
YHR104W	0.0724867	0.610648	0.999031		YHR104W	0.662405	1.88743e-11	3.98488e-11		YHR104W	0.589918	9.07855e-09	1.80852e-08		YHR104W	0.303611	0.00415518	0.0879013		YHR104W	0.231124	0.0151044	0.108877
YOR120W	0.924778	0.00193787	#N/A		YOR120W	0.024253	0.894257	0.90489		YOR120W	-0.900525	0.00013625	0.000211275		YOR120W	1.31781	1.45331e-07	#N/A		YOR120W	0.393035	0.0151929	0.109364
YNR001C	0.0338973	0.830102	0.999031		YNR001C	0.234351	0.0344995	0.0422895		YNR001C	0.200453	0.0749358	0.0901192		YNR001C	0.298402	0.00906812	0.144573		YNR001C	0.264505	0.0152363	0.109526
YGL255W	-0.122473	0.540035	0.999031		YGL255W	0.284544	0.0448134	0.0544707		YGL255W	0.407017	0.00385357	0.00529329		YGL255W	-0.445438	0.00279576	0.0674928		YGL255W	-0.322966	0.0153314	0.110058
YOR265W	0.408834	0.0112319	0.32809		YOR265W	1.8986	9.70477e-65	7.59966e-64		YOR265W	1.48977	1.35067e-37	7.27776e-37		YOR265W	0.145684	0.221513	0.638368		YOR265W	-0.26315	0.0154174	0.110371
YKL144C	0.204425	0.281144	0.999031		YKL144C	1.48362	5.32997e-29	1.95095e-28		YKL144C	1.2792	3.66318e-21	1.21414e-20		YKL144C	-0.0982096	0.491426	0.825885		YKL144C	-0.302635	0.0154029	0.110371
YHL001W	0.173864	0.102348	0.877273		YHL001W	3.11421	0	0		YHL001W	2.94034	0	0		YHL001W	-0.00882004	0.906376	0.974413		YHL001W	-0.182684	0.0155663	0.111285
YDR063W	-0.155704	0.338722	0.999031		YDR063W	0.58904	1.46935e-07	2.60593e-07		YDR063W	0.744744	2.79137e-10	6.0185e-10		YDR063W	0.0957467	0.44443	0.808599		YDR063W	0.251451	0.0155985	0.111363
YDR013W	0.324339	0.163723	#N/A		YDR013W	1.57406	3.32881e-22	1.01603e-21		YDR013W	1.24972	6.96623e-14	1.76119e-13		YDR013W	-0.0411365	0.816197	#N/A		YDR013W	-0.365476	0.0157697	0.112431
YMR247C	-0.228615	0.0506948	0.699192		YMR247C	-1.11615	1.10618e-42	5.68513e-42		YMR247C	-0.887532	3.90949e-26	1.50327e-25		YMR247C	-0.0577538	0.535186	0.845596		YMR247C	0.170861	0.0158188	0.112628
YJR124C	-0.0637906	0.6916	0.999031		YJR124C	-0.725092	1.69584e-10	3.43382e-10		YJR124C	-0.661302	6.37143e-09	1.2807e-08		YJR124C	-0.286816	0.0292327	0.261505		YJR124C	-0.223026	0.0158971	0.113031
YFR016C	-0.12361	0.420134	0.999031		YFR016C	1.10112	2.61368e-25	8.66287e-25		YFR016C	1.22473	2.23527e-28	9.22648e-28		YFR016C	0.122389	0.284662	0.70378		YFR016C	0.245999	0.0159749	0.113431
YGL021W	-0.103107	0.411846	0.999031		YGL021W	-0.797353	4.95521e-20	1.42737e-19		YGL021W	-0.694246	1.87514e-14	4.84439e-14		YGL021W	0.0832838	0.399972	0.787963		YGL021W	0.186391	0.0160643	0.11391
YBR071W	0.165781	0.166693	0.956742		YBR071W	1.0937	1.78302e-40	8.63458e-40		YBR071W	0.92792	2.29894e-26	8.89303e-26		YBR071W	0.355719	8.01561e-05	0.00645021		YBR071W	0.189939	0.016158	0.11442
YOR173W	0.512657	0.193874	#N/A		YOR173W	-0.752574	0.00182279	0.00250737		YOR173W	-1.26523	5.04918e-05	8.09208e-05		YOR173W	0.974502	0.00468522	#N/A		YOR173W	0.461844	0.0162827	0.115147
YBR009C	0.262125	0.0249641	0.475826		YBR009C	4.24169	0	0		YBR009C	3.97956	0	0		YBR009C	0.0568641	0.475925	0.818542		YBR009C	-0.205261	0.0163385	0.11523
YJL103C	0.0615937	0.85418	#N/A		YJL103C	-1.53387	1.93704e-12	4.25415e-12		YJL103C	-1.59547	3.70156e-10	7.91608e-10		YJL103C	0.445787	0.130089	#N/A		YJL103C	0.384193	0.0163225	0.11523
YBR196C	0.0554185	0.554051	0.999031		YBR196C	0.140235	0.0341431	0.0418822		YBR196C	0.0848169	0.200492	0.228305		YBR196C	-0.102838	0.121977	0.501597		YBR196C	-0.158257	0.016422	0.115662
YDR429C	0.133801	0.190263	0.977774		YDR429C	0.94703	1.45676e-39	6.9442e-39		YDR429C	0.81323	3.441e-29	1.44822e-28		YDR429C	-0.035539	0.630228	0.886842		YDR429C	-0.16934	0.0164694	0.11584
YGL106W	0.274476	0.0412636	0.63836		YGL106W	2.80525	6.16836e-194	1.77594e-192		YGL106W	2.53078	6.6074e-154	1.77847e-152		YGL106W	0.0451683	0.632502	0.886842		YGL106W	-0.229308	0.016615	0.116458
YMR214W	0.0162421	0.914617	0.999031		YMR214W	1.52736	1.92052e-46	1.06969e-45		YMR214W	1.51112	6.90216e-45	4.44797e-44		YMR214W	-0.230912	0.037324	0.291931		YMR214W	-0.247154	0.0166242	0.116458
YAL017W	-0.00532445	0.968162	0.999031		YAL017W	-1.12809	4.3766e-35	1.87056e-34		YAL017W	-1.12277	8.14538e-31	3.58459e-30		YAL017W	0.180291	0.0968219	0.463968		YAL017W	0.185615	0.0166168	0.116458
YNL091W	-0.160365	0.225809	0.982177		YNL091W	-0.647508	2.27473e-12	4.98253e-12		YNL091W	-0.487143	2.87976e-07	5.29222e-07		YNL091W	0.043271	0.669761	0.904252		YNL091W	0.203636	0.0166631	0.116575
YNL209W	0.0083335	0.922597	0.999031		YNL209W	0.518823	1.16288e-17	3.11555e-17		YNL209W	0.510489	3.90854e-17	1.11642e-16		YNL209W	-0.136509	0.0246754	0.246859		YNL209W	-0.144842	0.0167093	0.116586
YFL010C	0.161322	0.0915198	0.841047		YFL010C	0.773766	1.21554e-30	4.62482e-30		YFL010C	0.612445	2.01771e-19	6.31504e-19		YFL010C	0.00433732	0.950273	0.985402		YFL010C	-0.156984	0.0166988	0.116586
YDR378C	0.444114	0.0197902	0.437156		YDR378C	2.99965	2.21219e-113	3.38675e-112		YDR378C	2.55553	1.00085e-77	1.22451e-76		YDR378C	0.113523	0.386743	0.78033		YDR378C	-0.330591	0.016807	0.117037
YMR131C	0.00167851	0.986966	0.9991		YMR131C	-0.554799	1.86152e-14	4.435e-14		YMR131C	-0.556478	2.23016e-14	5.74108e-14		YMR131C	-0.163462	0.0315735	0.270039		YMR131C	-0.16514	0.0168482	0.117037
YJR030C	-0.149221	0.374617	0.999031		YJR030C	-0.761354	4.21664e-11	8.79341e-11		YJR030C	-0.612133	5.42542e-07	9.80541e-07		YJR030C	0.0840729	0.538861	0.845692		YJR030C	0.233294	0.0168635	0.117037
YEL038W	-0.133435	0.357824	0.999031		YEL038W	0.773699	4.83877e-14	1.13506e-13		YEL038W	0.907134	9.14253e-19	2.78462e-18		YEL038W	-0.355819	0.0013987	0.0428378		YEL038W	-0.222384	0.0168268	0.117037
YJR007W	0.0708179	0.475574	0.999031		YJR007W	0.372287	1.03537e-07	1.84587e-07		YJR007W	0.301469	1.85252e-05	3.05603e-05		YJR007W	-0.0920897	0.2011	0.619141		YJR007W	-0.162908	0.0170613	0.118252
YDR391C	-0.112204	0.603795	0.999031		YDR391C	0.586652	6.71587e-05	0.000102114		YDR391C	0.698856	1.0233e-05	1.72246e-05		YDR391C	0.211065	0.210137	#N/A		YDR391C	0.323268	0.0171102	0.118278
YML070W	0.128495	0.267733	0.999031		YML070W	1.33704	1.77587e-60	1.2927e-59		YML070W	1.20854	1.21796e-48	8.59551e-48		YML070W	-0.061198	0.468074	0.818542		YML070W	-0.189693	0.0171035	0.118278
YOL127W	0.121713	0.266779	0.999031		YOL127W	0.598589	1.10323e-14	2.65575e-14		YOL127W	0.476875	7.7067e-10	1.62591e-09		YOL127W	-0.0621387	0.423993	0.796516		YOL127W	-0.183852	0.0173551	0.119812
YCR005C	0.0463212	0.785309	0.999031		YCR005C	1.01104	3.65009e-17	9.59267e-17		YCR005C	0.964722	1.15583e-15	3.1388e-15		YCR005C	-0.230416	0.063148	0.378888		YCR005C	-0.276738	0.0173888	0.119886
YBR039W	-0.0556888	0.582521	0.999031		YBR039W	0.677409	1.56706e-21	4.70119e-21		YBR039W	0.733098	3.12613e-24	1.13637e-23		YBR039W	0.109897	0.135225	0.520639		YBR039W	0.165585	0.0174304	0.119952
YHL011C	-0.0528934	0.631528	0.999031		YHL011C	0.0420473	0.589079	0.618025		YHL011C	0.0949406	0.224333	0.253657		YHL011C	-0.230393	0.00453519	0.0939573		YHL011C	-0.1775	0.0174443	0.119952
YER031C	0.00401495	0.972266	0.999031		YER031C	0.731437	2.06443e-19	5.78822e-19		YER031C	0.727422	8.24726e-19	2.51724e-18		YER031C	-0.176889	0.0416415	0.307922		YER031C	-0.180904	0.0174919	0.120122
YKR085C	0.475554	0.00410326	0.176878		YKR085C	2.07185	2.26759e-73	2.03766e-72		YKR085C	1.59629	1.95914e-40	1.13489e-39		YKR085C	0.209187	0.0863715	0.44143		YKR085C	-0.266368	0.0175247	0.120189
YKL010C	0.0284551	0.825103	0.999031		YKL010C	-0.0113527	0.897956	0.907839		YKL010C	-0.0398078	0.670313	0.697429		YKL010C	0.220525	0.0277406	0.257436		YKL010C	0.19207	0.0175548	0.120238
YJL217W	0.077631	0.571109	0.999031		YJL217W	0.968886	1.26304e-23	3.98755e-23		YJL217W	0.891255	4.42693e-20	1.41461e-19		YJL217W	-0.147916	0.134275	0.520604		YJL217W	-0.225547	0.017602	0.120403
YGL156W	-0.0257395	0.923168	#N/A		YGL156W	-0.891756	4.83875e-07	8.3463e-07		YGL156W	-0.866016	1.42908e-05	2.37919e-05		YGL156W	0.300289	0.189366	#N/A		YGL156W	0.326029	0.0176505	0.120454
YNL280C	0.058227	0.622296	0.999031		YNL280C	0.780571	5.25802e-21	1.55643e-20		YNL280C	0.722344	9.2121e-18	2.702e-17		YNL280C	-0.127734	0.148863	0.541609		YNL280C	-0.185961	0.0176555	0.120454
YGR110W	0.543216	0.192135	#N/A		YGR110W	-0.44663	0.078153	0.092338		YGR110W	-0.989846	0.00273721	0.00381508		YGR110W	1.03625	0.00408623	#N/A		YGR110W	0.493029	0.0177184	0.120725
YKR056W	-0.0101421	0.935557	0.999031		YKR056W	0.890506	6.43105e-24	2.0505e-23		YKR056W	0.900648	5.03386e-24	1.81163e-23		YKR056W	-0.208017	0.0262746	0.252929		YKR056W	-0.197875	0.0177892	0.12105
YAR009C	-0.410979	0.00841307	0.274232		YAR009C	-7.88789	0	0		YAR009C	-7.47691	0	0		YAR009C	-0.178938	0.140468	0.528395		YAR009C	0.232041	0.0178133	0.121057
YLR157C-B	-0.203864	0.0998173	0.870498		YLR157C-B	-6.53988	0	0		YLR157C-B	-6.33601	0	0		YLR157C-B	-0.00758984	0.934287	0.982068		YLR157C-B	0.196273	0.0178939	0.121132
YKR031C	-0.0924952	0.540139	0.999031		YKR031C	-1.28729	1.43162e-35	6.19657e-35		YKR031C	-1.1948	1.77941e-27	7.12626e-27		YKR031C	0.108076	0.38724	0.780566		YKR031C	0.200572	0.0178737	0.121132
YIL117C	0.0803128	0.538691	0.999031		YIL117C	0.0466025	0.605104	0.634028		YIL117C	-0.0337103	0.72148	0.746639		YIL117C	0.279931	0.00503843	0.0984654		YIL117C	0.199618	0.0178559	0.121132
YDR050C	0.0820814	0.409242	0.999031		YDR050C	2.20659	3.12276e-216	1.09524e-214		YDR050C	2.1245	2.79589e-200	1.10067e-198		YDR050C	-0.0841237	0.231897	0.646979		YDR050C	-0.166205	0.0180621	0.122112
YMR196W	0.221716	0.331615	0.999031		YMR196W	-1.27541	1.39489e-17	3.71993e-17		YMR196W	-1.49712	4.36127e-18	1.29629e-17		YMR196W	0.498541	0.0109697	0.162539		YMR196W	0.276825	0.0181906	0.122822
YMR038C	0.177215	0.109342	0.884702		YMR038C	1.10528	1.00306e-45	5.49688e-45		YMR038C	0.928068	3.90995e-32	1.79152e-31		YMR038C	-0.00288861	0.971255	0.993165		YMR038C	-0.180104	0.0182725	0.123057
YKL105C	-0.0946596	0.536906	0.999031		YKL105C	-0.66688	2.57948e-10	5.17955e-10		YKL105C	-0.57222	2.68474e-07	4.93853e-07		YKL105C	0.122866	0.315878	0.727923		YKL105C	0.217526	0.0182531	0.123057
YBR126C	-0.00911748	0.937432	0.999031		YBR126C	0.830859	1.62457e-24	5.2787e-24		YBR126C	0.839976	4.21782e-24	1.52173e-23		YBR126C	0.178725	0.0344489	0.281364		YBR126C	0.187842	0.0183942	0.123717
YJR039W	-0.335828	0.230375	0.982177		YJR039W	-1.93896	4.78264e-24	1.53251e-23		YJR039W	-1.60313	3.97945e-15	1.05978e-14		YJR039W	-0.035603	0.886416	#N/A		YJR039W	0.300225	0.018599	0.124934
YDR086C	0.255837	0.0500278	0.699192		YDR086C	3.25403	2.77824e-277	1.29659e-275		YDR086C	2.9982	2.98672e-227	1.39388e-225		YDR086C	0.0326041	0.716076	0.92038		YDR086C	-0.223233	0.0186616	0.125193
YDR167W	0.314972	0.0418459	0.639547		YDR167W	1.87896	2.7677e-68	2.29137e-67		YDR167W	1.56399	6.87875e-45	4.43783e-44		YDR167W	0.069013	0.545141	0.848088		YDR167W	-0.245959	0.0187225	0.125283
YMR031C	0.00307568	0.980124	0.9991		YMR031C	1.45014	3.86037e-64	2.99463e-63		YMR031C	1.44706	1.06685e-59	9.46914e-59		YMR031C	0.201695	0.025054	0.248772		YMR031C	0.198619	0.018723	0.125283
YDR226W	0.0651526	0.469049	0.999031		YDR226W	1.26526	2.47797e-88	2.88532e-87		YDR226W	1.20011	4.90788e-79	6.1211e-78		YDR226W	-0.0825828	0.198968	0.616732		YDR226W	-0.147735	0.0189505	0.126643
YBL039C	-0.0693244	0.509922	0.999031		YBL039C	0.461447	5.3195e-10	1.05461e-09		YBL039C	0.530772	1.01981e-12	2.46208e-12		YBL039C	-0.240163	0.00153617	0.0460179		YBL039C	-0.170839	0.0191652	0.127915
YER011W	-0.0463622	0.830748	0.999031		YER011W	1.19766	6.96985e-15	1.68976e-14		YER011W	1.24403	4.09367e-16	1.13133e-15		YER011W	-0.375285	0.0231458	#N/A		YER011W	-0.328923	0.01923	0.128184
YNR047W	-0.11554	0.392287	0.999031		YNR047W	-1.02375	4.18248e-28	1.49592e-27		YNR047W	-0.908212	1.60747e-20	5.21437e-20		YNR047W	0.0703487	0.519444	0.838145		YNR047W	0.185889	0.0193311	0.12853
YJL011C	0.486683	0.0112014	0.32809		YJL011C	2.28287	1.99837e-66	1.59732e-65		YJL011C	1.79619	2.33424e-38	1.27556e-37		YJL011C	0.17927	0.199797	0.617444		YJL011C	-0.307413	0.0193183	0.12853
YER138C	-0.307461	0.0158561	0.388956		YER138C	-6.63186	0	0		YER138C	-6.3244	0	0		YER138C	-0.106587	0.257701	0.676219		YER138C	0.200873	0.0193557	0.12853
YNL095C	-0.0268215	0.911359	0.999031		YNL095C	0.0547616	0.748788	0.770764		YNL095C	0.0815832	0.630738	0.660768		YNL095C	-0.378535	0.0441916	0.316524		YNL095C	-0.351714	0.0194708	0.12913
YAR042W	-0.13803	0.327514	0.999031		YAR042W	-1.42444	4.38611e-48	2.53318e-47		YAR042W	-1.28641	9.08022e-37	4.79883e-36		YAR042W	0.062604	0.575283	0.861151		YAR042W	0.200634	0.0195865	0.129733
YOR150W	0.0020188	0.988901	0.999164		YOR150W	0.298533	0.00260916	0.00354775		YOR150W	0.296514	0.00513082	0.00696834		YOR150W	0.211742	0.0630622	0.378888		YOR150W	0.209724	0.0196545	0.130018
YIL051C	0.1927	0.107914	0.884702		YIL051C	1.86791	2.8936e-108	4.26088e-107		YIL051C	1.67521	1.89995e-86	2.6494e-85		YIL051C	-0.00340266	0.968224	0.992901		YIL051C	-0.196103	0.0197022	0.130169
YOR119C	0.150296	0.356375	0.999031		YOR119C	1.45882	1.46172e-37	6.65014e-37		YOR119C	1.30852	3.00847e-29	1.26803e-28		YOR119C	-0.0991452	0.419383	0.79246		YOR119C	-0.249441	0.0199089	0.131369
YIL103W	0.126576	0.398472	0.999031		YIL103W	0.307225	0.00340761	0.00458601		YIL103W	0.180649	0.0915876	0.108923		YIL103W	-0.0943669	0.415847	0.79231		YIL103W	-0.220943	0.0200075	0.131687
YCR072C	0.109844	0.392613	0.999031		YCR072C	0.953838	3.84262e-26	1.30042e-25		YCR072C	0.843994	2.91563e-20	9.37375e-20		YCR072C	-0.0902074	0.344776	0.750057		YCR072C	-0.200052	0.0199829	0.131687
YKR011C	-0.093757	0.648941	0.999031		YKR011C	1.68554	1.48392e-32	5.93055e-32		YKR011C	1.7793	9.58003e-33	4.46374e-32		YKR011C	0.234884	0.116892	0.495248		YKR011C	0.328641	0.0200598	0.131865
YBR121C-A	0.389147	0.0792151	0.834002		YBR121C-A	1.03204	1.87608e-11	3.96237e-11		YBR121C-A	0.642895	5.73873e-05	9.15128e-05		YBR121C-A	0.063915	0.710122	#N/A		YBR121C-A	-0.325232	0.0201215	0.132104
YLR441C	0.033543	0.731901	0.999031		YLR441C	0.854614	4.90171e-35	2.08728e-34		YLR441C	0.821071	2.02967e-32	9.37408e-32		YLR441C	-0.126712	0.0681151	0.390414		YLR441C	-0.160255	0.0202067	0.132435
YNL267W	-0.184281	0.186461	0.976319		YNL267W	-1.04597	2.99682e-27	1.05043e-26		YNL267W	-0.86169	9.9546e-18	2.91683e-17		YNL267W	0.010374	0.925866	0.97893		YNL267W	0.194655	0.0202226	0.132435
YOL097C	-0.00795483	0.941772	0.999031		YOL097C	0.166968	0.0298163	0.0368297		YOL097C	0.174923	0.023391	0.0297437		YOL097C	-0.181094	0.0221909	0.228249		YOL097C	-0.173139	0.0205807	0.134444
YNL271C	-0.144231	0.257901	0.992666		YNL271C	-1.2509	2.23e-45	1.20947e-44		YNL271C	-1.10667	1.75962e-33	8.43654e-33		YNL271C	0.0354481	0.726008	0.926473		YNL271C	0.179679	0.0205704	0.134444
YDL207W	-0.238209	0.145017	0.930459		YDL207W	-0.59965	1.1819e-07	2.10193e-07		YDL207W	-0.36144	0.00216983	0.00306414		YDL207W	-0.011028	0.932753	0.982068		YDL207W	0.227181	0.020652	0.134573
YPL085W	-0.0559378	0.626141	0.999031		YPL085W	-0.869591	4.53487e-27	1.57807e-26		YPL085W	-0.813654	2.23058e-23	7.86617e-23		YPL085W	0.125847	0.133001	0.519842		YPL085W	0.181784	0.0206286	0.134573
YDL212W	0.00574238	0.955419	0.999031		YDL212W	0.100117	0.165699	0.188649		YDL212W	0.0943744	0.196322	0.224262		YDL212W	-0.150224	0.0524345	0.349336		YDL212W	-0.155967	0.0207968	0.134844
YML081C-A	0.412741	0.00764967	0.258896		YML081C-A	1.77765	3.78727e-61	2.77781e-60		YML081C-A	1.36491	1.04904e-34	5.17105e-34		YML081C-A	0.169462	0.135294	0.520639		YML081C-A	-0.243279	0.0207861	0.134844
YNR012W	-0.0611048	0.699328	0.999031		YNR012W	-0.776638	3.6701e-12	7.98453e-12		YNR012W	-0.715533	1.66352e-10	3.63549e-10		YNR012W	-0.288229	0.0201212	0.220796		YNR012W	-0.227124	0.0207723	0.134844
YJL039C	-0.19743	0.0516576	0.70243		YJL039C	-1.46561	9.71887e-95	1.20953e-93		YJL039C	-1.26818	1.63946e-68	1.71565e-67		YJL039C	-0.0491903	0.531528	0.845492		YJL039C	0.14824	0.0207931	0.134844
YDR097C	-0.0613652	0.614725	0.999031		YDR097C	-0.147215	0.0812466	0.0957194		YDR097C	-0.0858501	0.328962	0.361783		YDR097C	0.117561	0.211796	0.626282		YDR097C	0.178926	0.0208797	0.134879
YDR464W	-0.0986828	0.474688	0.999031		YDR464W	-0.646507	1.07191e-11	2.28308e-11		YDR464W	-0.547825	4.34404e-08	8.3214e-08		YDR464W	0.0926156	0.401824	0.788676		YDR464W	0.191298	0.0208293	0.134879
YPR094W	0.607347	0.0111949	0.32809		YPR094W	0.968759	3.56476e-09	6.78371e-09		YPR094W	0.361412	0.0381846	0.0475315		YPR094W	0.262487	0.160921	#N/A		YPR094W	-0.34486	0.0208579	0.134879
YDR400W	0.198563	0.142043	0.927907		YDR400W	-0.166912	0.0755569	0.0895266		YDR400W	-0.365475	0.000172611	0.000265031		YDR400W	0.00883469	0.934448	0.982068		YDR400W	-0.189728	0.0209474	0.134983
YGL099W	0.09083	0.46691	0.999031		YGL099W	0.651962	1.12512e-13	2.60131e-13		YGL099W	0.561132	2.58165e-10	5.57462e-10		YGL099W	-0.103412	0.262327	0.679666		YGL099W	-0.194242	0.0209358	0.134983
YDR101C	-0.0487206	0.672247	0.999031		YDR101C	0.602426	1.23925e-13	2.85947e-13		YDR101C	0.651147	1.45515e-15	3.94056e-15		YDR101C	-0.230252	0.00616739	0.111502		YDR101C	-0.181531	0.0210777	0.135584
YML031W	-0.0234288	0.847673	0.999031		YML031W	-1.15285	2.96802e-41	1.47054e-40		YML031W	-1.12942	1.02735e-38	5.67295e-38		YML031W	-0.19208	0.0491012	0.338106		YML031W	-0.168651	0.0210925	0.135584
YBR189W	0.120302	0.229485	0.982177		YBR189W	0.901223	3.69672e-37	1.66741e-36		YBR189W	0.780921	2.83724e-28	1.16862e-27		YBR189W	-0.0420741	0.5533	0.851141		YBR189W	-0.162376	0.0214599	0.137776
YPR166C	0.372502	0.020031	0.440285		YPR166C	2.03026	1.15332e-74	1.06109e-73		YPR166C	1.65776	8.70049e-47	5.84782e-46		YPR166C	0.122266	0.298081	0.713728		YPR166C	-0.250236	0.0214957	0.137836
YDL092W	0.359692	0.00917028	0.290829		YDL092W	1.61412	2.46059e-63	1.88352e-62		YDL092W	1.25443	1.03767e-36	5.45908e-36		YDL092W	0.145638	0.152523	0.547642		YDL092W	-0.214054	0.0216888	0.138904
YLR213C	0.27548	0.428762	#N/A		YLR213C	-0.692957	0.00432408	0.00576179		YLR213C	-0.968437	0.000103428	0.000162074		YLR213C	-0.137736	0.643803	#N/A		YLR213C	-0.413216	0.0218235	0.139334
YPR033C	-0.0618875	0.520705	0.999031		YPR033C	0.895887	1.20974e-39	5.78098e-39		YPR033C	0.957774	1.05448e-44	6.77277e-44		YPR033C	-0.214349	0.00211797	0.0564425		YPR033C	-0.152461	0.021836	0.139334
YBR115C	-0.0797855	0.398291	0.999031		YBR115C	-0.602029	1.77139e-19	4.98105e-19		YBR115C	-0.522243	5.81555e-15	1.53464e-14		YBR115C	-0.227302	0.00101843	0.035193		YBR115C	-0.147517	0.021791	0.139334
YGR184C	-0.13666	0.231328	0.982177		YGR184C	-1.64111	3.54305e-95	4.45732e-94		YGR184C	-1.50445	6.62147e-75	7.7725e-74		YGR184C	0.0206742	0.820752	0.960062		YGR184C	0.157334	0.0218721	0.139395
YER007C-A	0.162653	0.226757	0.982177		YER007C-A	3.85408	0	0		YER007C-A	3.69143	0	0		YER007C-A	-0.0715096	0.414061	0.790692		YER007C-A	-0.234163	0.0219301	0.139594
YDR227W	-0.0145793	0.924112	0.999031		YDR227W	-0.614046	4.49362e-09	8.50379e-09		YDR227W	-0.599467	7.89764e-08	1.49163e-07		YDR227W	0.193503	0.116004	0.49512		YDR227W	0.208082	0.0221256	0.140496
YGL016W	-0.0540744	0.648948	0.999031		YGL016W	-1.38249	1.95915e-61	1.44612e-60		YGL016W	-1.32842	7.90242e-56	6.50516e-55		YGL016W	-0.217602	0.0218297	0.226807		YGL016W	-0.163528	0.0221184	0.140496
YDL078C	0.194458	0.0987197	0.865372		YDL078C	1.14107	2.18902e-43	1.14228e-42		YDL078C	0.946609	1.68534e-29	7.19782e-29		YDL078C	0.0111722	0.89702	0.972861		YDL078C	-0.183286	0.022163	0.140563
YML111W	-0.146382	0.287158	0.999031		YML111W	-1.12379	4.16927e-32	1.65144e-31		YML111W	-0.977405	6.49871e-23	2.2601e-22		YML111W	0.0432647	0.693249	0.912623		YML111W	0.189647	0.0222657	0.140935
YER088C	-0.00310309	0.978322	0.9991		YER088C	-0.689151	3.22483e-18	8.76338e-18		YER088C	-0.686048	7.60684e-17	2.15155e-16		YER088C	0.162996	0.0642673	0.381697		YER088C	0.166099	0.0222756	0.140935
YDR295C	-0.273424	0.0982476	0.865372		YDR295C	-0.408083	0.000370475	0.000539084		YDR295C	-0.134659	0.258617	0.289481		YDR295C	-0.0469911	0.722634	0.924467		YDR295C	0.226433	0.022311	0.140988
YDR098C-A	-0.120143	0.300451	0.999031		YDR098C-A	-3.23257	0	0		YDR098C-A	-3.11242	0	0		YDR098C-A	-0.274694	0.00356538	0.0790937		YDR098C-A	-0.154551	0.0223527	0.141081
YGR001C	0.100826	0.406057	0.999031		YGR001C	0.543975	1.60216e-10	3.24868e-10		YGR001C	0.443149	3.05677e-07	5.6015e-07		YGR001C	-0.0807027	0.378519	0.774744		YGR001C	-0.181529	0.0224913	0.141785
YPL198W	0.0248468	0.787605	0.999031		YPL198W	1.85772	1.21726e-178	3.21657e-177		YPL198W	1.83287	1.09529e-173	3.58105e-172		YPL198W	-0.123647	0.0582297	0.366531		YPL198W	-0.148493	0.0226245	0.142375
YJL020C	-0.00604909	0.956049	0.999031		YJL020C	-0.542242	1.79849e-12	3.96187e-12		YJL020C	-0.536193	7.46915e-12	1.73312e-11		YJL020C	0.163204	0.0434793	0.312503		YJL020C	0.169253	0.0226395	0.142375
YDR133C	0.0345337	0.950382	0.999031		YDR133C	-7.53114	5.20167e-98	6.71921e-97		YDR133C	-7.56568	2.56034e-71	2.81686e-70		YDR133C	0.214157	0.696645	0.913122		YDR133C	0.179622	0.0228378	0.14345
YDR441C	0.133567	0.363627	0.999031		YDR441C	-0.468099	5.0045e-06	8.17646e-06		YDR441C	-0.601666	1.12367e-08	2.22619e-08		YDR441C	-0.0678148	0.563365	0.855998		YDR441C	-0.201382	0.0229702	0.144108
YLR223C	-0.121147	0.429932	0.999031		YLR223C	0.0230954	0.827503	0.843537		YLR223C	0.144243	0.193837	0.221556		YLR223C	0.0979331	0.412337	0.789656		YLR223C	0.21908	0.0230027	0.144139
YOR332W	0.0266269	0.816047	0.999031		YOR332W	1.59592	1.01276e-86	1.14024e-85		YOR332W	1.56929	1.37462e-83	1.83293e-82		YOR332W	-0.156259	0.0547558	0.356134		YOR332W	-0.182886	0.0231225	0.144569
YNL189W	-0.0530136	0.578537	0.999031		YNL189W	0.341792	3.85474e-07	6.68287e-07		YNL189W	0.394806	5.27309e-09	1.0666e-08		YNL189W	-0.201424	0.00377898	0.0824943		YNL189W	-0.14841	0.0231266	0.144569
YDR210C-D	-0.529973	4.01613e-05	0.00601795		YDR210C-D	-6.97903	0	0		YDR210C-D	-6.44906	0	0		YDR210C-D	-0.341769	0.000548972	0.0228168		YDR210C-D	0.188203	0.0232068	0.144897
YPR186C	-0.125763	0.557782	0.999031		YPR186C	0.0460285	0.752384	0.774053		YPR186C	0.171791	0.274864	0.306186		YPR186C	0.162891	0.345793	#N/A		YPR186C	0.288653	0.0232709	0.145124
YDL077C	-0.270371	0.118488	0.896961		YDL077C	-1.36634	4.13075e-30	1.55326e-29		YDL077C	-1.09597	1.85015e-18	5.57356e-18		YDL077C	-0.0545108	0.706292	0.917278		YDL077C	0.21586	0.0234109	0.145823
YDR283C	-0.0837295	0.558182	0.999031		YDR283C	-1.38919	1.43009e-45	7.80015e-45		YDR283C	-1.30546	4.40517e-36	2.26804e-35		YDR283C	0.0975074	0.410524	0.788676		YDR283C	0.181237	0.0235843	0.146032
YDR508C	0.118857	0.233822	0.982177		YDR508C	0.151006	0.0317219	0.0390335		YDR508C	0.032149	0.650132	0.678751		YDR508C	-0.0360435	0.620267	0.883523		YDR508C	-0.154901	0.0234729	0.146032
YMR280C	-0.579136	0.120643	#N/A		YMR280C	-1.08338	2.73709e-05	4.26942e-05		YMR280C	-0.504241	0.0611324	0.0742441		YMR280C	-0.117786	0.706331	#N/A		YMR280C	0.46135	0.0235466	0.146032
YBR241C	-0.183219	0.382274	0.999031		YBR241C	-0.34774	0.015057	0.0190541		YBR241C	-0.164521	0.283308	0.314744		YBR241C	0.0866449	0.615542	#N/A		YBR241C	0.269864	0.0235597	0.146032
YIR035C	0.0430715	0.792579	0.999031		YIR035C	1.35021	1.11187e-31	4.37118e-31		YIR035C	1.30714	2.75342e-29	1.16562e-28		YIR035C	-0.206371	0.0887518	0.442573		YIR035C	-0.249442	0.0235022	0.146032
YBL093C	0.0140851	0.925143	0.999031		YBL093C	0.958111	9.45689e-20	2.69326e-19		YBL093C	0.944026	8.65101e-19	2.6363e-18		YBL093C	-0.205767	0.0713679	0.397954		YBL093C	-0.219852	0.0237212	0.146533
YIR026C	-0.170002	0.319715	0.999031		YIR026C	0.194376	0.108574	0.126016		YIR026C	0.364379	0.00249178	0.00348897		YIR026C	-0.426889	0.000823676	0.0303798		YIR026C	-0.256887	0.0237122	0.146533
YDR146C	0.022819	0.852629	0.999031		YDR146C	0.0954026	0.262663	0.290193		YDR146C	0.0725836	0.412207	0.446712		YDR146C	0.204018	0.0283584	0.258055		YDR146C	0.181199	0.0238237	0.146992
YKL203C	-0.132923	0.311501	0.999031		YKL203C	-1.88196	9.13212e-96	1.1564e-94		YKL203C	-1.74904	1.28946e-75	1.52288e-74		YKL203C	0.0337245	0.756136	0.940303		YKL203C	0.166648	0.0240743	0.148364
YPR102C	0.122428	0.232657	0.982177		YPR102C	1.49706	9.68701e-95	1.20816e-93		YPR102C	1.37463	5.07803e-80	6.45859e-79		YPR102C	-0.0407315	0.575169	0.861151		YPR102C	-0.16316	0.0241972	0.148898
YBL090W	0.287639	0.0917211	0.841047		YBL090W	1.53387	3.36021e-38	1.55564e-37		YBL090W	1.24623	2.58349e-24	9.40886e-24		YBL090W	0.0329909	0.796246	0.955932		YBL090W	-0.254648	0.024218	0.148898
YER126C	0.134835	0.266536	0.999031		YER126C	1.78726	8.39678e-98	1.07983e-96		YER126C	1.65243	2.02465e-81	2.62705e-80		YER126C	-0.053688	0.54117	0.847107		YER126C	-0.188523	0.0243144	0.149124
YHR146W	0.125297	0.295852	0.999031		YHR146W	1.73647	4.01165e-94	4.97118e-93		YHR146W	1.61117	7.11114e-80	8.98519e-79		YHR146W	-0.062622	0.466819	0.81815		YHR146W	-0.18792	0.0242909	0.149124
YIL043C	-0.0840192	0.41279	0.999031		YIL043C	0.101352	0.161476	0.184021		YIL043C	0.185371	0.0107711	0.0141632		YIL043C	-0.239456	0.00160289	0.0471056		YIL043C	-0.155437	0.0243404	0.149124
YDR449C	0.113275	0.442099	0.999031		YDR449C	1.63211	4.13308e-56	2.78118e-55		YDR449C	1.51884	1.96727e-47	1.34889e-46		YDR449C	-0.112262	0.298486	0.713728		YDR449C	-0.225537	0.0245235	0.15007
YDR156W	0.249388	0.0753321	0.822067		YDR156W	1.8938	7.80868e-83	8.29153e-82		YDR156W	1.64441	1.15316e-60	1.03946e-59		YDR156W	0.0320349	0.752235	0.937781		YDR156W	-0.217353	0.0247181	0.150594
YBR084W	0.0564353	0.54421	0.999031		YBR084W	-0.388492	3.15541e-09	6.02453e-09		YBR084W	-0.444927	1.58607e-11	3.61504e-11		YBR084W	-0.0863793	0.203659	0.622055		YBR084W	-0.142815	0.0246843	0.150594
YJL221C	0.0062518	0.987568	#N/A		YJL221C	0.176134	0.541984	0.572034		YJL221C	0.169882	0.541849	0.57409		YJL221C	-0.516123	0.114345	#N/A		YJL221C	-0.522375	0.0247529	0.150594
YIL172C	0.0062518	0.987568	#N/A		YIL172C	0.176134	0.541984	0.572034		YIL172C	0.169882	0.541849	0.57409		YIL172C	-0.516123	0.114345	#N/A		YIL172C	-0.522375	0.0247529	0.150594
YCR091W	-0.0643883	0.83081	#N/A		YCR091W	-0.545883	0.00651295	0.00854272		YCR091W	-0.481495	0.0322467	0.0404359		YCR091W	0.300196	0.237006	#N/A		YCR091W	0.364584	0.0247532	0.150594
YEL001C	0.240391	0.0415509	0.63836		YEL001C	1.001	5.54147e-34	2.29388e-33		YEL001C	0.76061	2.08994e-19	6.53402e-19		YEL001C	0.0639443	0.467038	0.81815		YEL001C	-0.176447	0.0248404	0.150949
YKL216W	-0.0722742	0.480875	0.999031		YKL216W	1.1625	3.63469e-58	2.54341e-57		YKL216W	1.23478	1.05933e-64	1.03379e-63		YKL216W	-0.230192	0.00201026	0.0542771		YKL216W	-0.157918	0.0249185	0.151247
YGR245C	-0.0658928	0.596893	0.999031		YGR245C	0.34068	0.000106127	0.000159273		YGR245C	0.406572	4.14214e-06	7.12773e-06		YGR245C	-0.251395	0.00686734	0.11993		YGR245C	-0.185502	0.0252606	0.153146
YMR027W	0.151036	0.258479	0.992666		YMR027W	1.11521	1.25604e-32	5.02678e-32		YMR027W	0.964171	4.45983e-24	1.60604e-23		YMR027W	-0.0502457	0.610929	0.880664		YMR027W	-0.201281	0.0254203	0.153936
YML016C	0.00448292	0.972491	0.999031		YML016C	-0.741985	1.61996e-16	4.16098e-16		YML016C	-0.746468	1.79021e-15	4.82756e-15		YML016C	0.188052	0.0618194	0.374826		YML016C	0.183569	0.0255715	0.154364
YNL167C	-0.122788	0.352664	0.999031		YNL167C	-0.824962	1.58893e-19	4.48203e-19		YNL167C	-0.702174	1.9573e-13	4.86341e-13		YNL167C	0.0532481	0.615422	0.88299		YNL167C	0.176036	0.0255797	0.154364
YFL016C	0.022817	0.838857	0.999031		YFL016C	0.713783	5.79454e-20	1.66334e-19		YFL016C	0.690966	1.04011e-17	3.04458e-17		YFL016C	0.190645	0.0221162	0.228249		YFL016C	0.167828	0.025547	0.154364
YDR037W	-0.0437814	0.649596	0.999031		YDR037W	-0.192351	0.0047406	0.00629506		YDR037W	-0.148569	0.0293104	0.0368897		YDR037W	-0.194631	0.00460171	0.0939573		YDR037W	-0.15085	0.0256303	0.154376
YCR073W-A	0.0470969	0.726475	0.999031		YCR073W-A	0.774838	2.38305e-16	6.08592e-16		YCR073W-A	0.727741	3.2612e-14	8.33226e-14		YCR073W-A	-0.148959	0.14425	0.533815		YCR073W-A	-0.196056	0.0256408	0.154376
YDR023W	0.0414935	0.66422	0.999031		YDR023W	1.65619	4.826e-133	9.18686e-132		YDR023W	1.61469	1.04008e-125	2.3061e-124		YDR023W	-0.108139	0.111938	0.490283		YDR023W	-0.149633	0.0258449	0.155274
YGL120C	0.00906213	0.935557	0.999031		YGL120C	-0.397646	4.87261e-07	8.4022e-07		YGL120C	-0.406708	3.0879e-07	5.65496e-07		YGL120C	-0.160214	0.0518808	0.347339		YGL120C	-0.169276	0.0258493	0.155274
YDL073W	-0.369944	0.0607891	0.753921		YDL073W	-2.14189	7.3639e-55	4.84811e-54		YDL073W	-1.77194	6.89557e-36	3.54079e-35		YDL073W	-0.158292	0.359898	0.757059		YDL073W	0.211651	0.0259767	0.155746
YPL065W	0.361425	0.06512	0.771169		YPL065W	0.69706	2.53146e-07	4.43523e-07		YPL065W	0.335635	0.0179607	0.0231334		YPL065W	0.0936363	0.544986	0.848088		YPL065W	-0.267789	0.0259874	0.155746
YDR463W	-0.04656	0.67207	0.999031		YDR463W	0.261651	0.000614041	0.000874804		YDR463W	0.308211	9.83835e-05	0.00015442		YDR463W	0.112963	0.175626	0.576615		YDR463W	0.159523	0.0260909	0.156008
YOR157C	0.223148	0.0320529	0.546001		YOR157C	1.40261	1.91113e-82	2.01452e-81		YOR157C	1.17947	8.91129e-57	7.4847e-56		YOR157C	0.0646978	0.394133	0.784746		YOR157C	-0.158451	0.0260715	0.156008
YDL014W	0.202557	0.0562631	0.737859		YDL014W	1.31363	7.07118e-69	5.92199e-68		YDL014W	1.11107	1.91935e-49	1.38667e-48		YDL014W	0.0368742	0.625536	0.885235		YDL014W	-0.165683	0.0261426	0.156139
YDR398W	0.042244	0.715334	0.999031		YDR398W	0.261694	0.00131266	0.00182605		YDR398W	0.21945	0.00771274	0.0102724		YDR398W	-0.12861	0.137796	0.522655		YDR398W	-0.170854	0.0262106	0.156366
YDR052C	-0.345225	0.0153284	0.386694		YDR052C	-0.656239	4.21864e-11	8.7944e-11		YDR052C	-0.311013	0.00226456	0.00318934		YDR052C	-0.154853	0.173281	0.573422		YDR052C	0.190372	0.0263077	0.156766
YNL247W	-0.0498832	0.620382	0.999031		YNL247W	0.202954	0.00429246	0.00572229		YNL247W	0.252837	0.000395477	0.000591071		YNL247W	-0.202661	0.00582741	0.106292		YNL247W	-0.152778	0.0264912	0.15758
YEL024W	-0.0164443	0.892258	0.999031		YEL024W	1.26649	2.35381e-50	1.43233e-49		YEL024W	1.28294	2.03093e-49	1.46182e-48		YEL024W	0.169166	0.0545231	0.355744		YEL024W	0.185611	0.0265046	0.15758
YPL157W	0.0733212	0.729045	0.999031		YPL157W	1.39789	6.53038e-21	1.92225e-20		YPL157W	1.32457	1.2394e-18	3.75519e-18		YPL157W	-0.233685	0.144512	#N/A		YPL157W	-0.307007	0.0265455	0.157644
YGR098C	-0.158508	0.37415	0.999031		YGR098C	-1.80114	2.05145e-49	1.22263e-48		YGR098C	-1.64263	1.73502e-36	9.05369e-36		YGR098C	0.0400158	0.795304	0.955932		YGR098C	0.198524	0.0266222	0.157741
YLL045C	0.0909184	0.332123	0.999031		YLL045C	0.794381	4.09929e-33	1.65661e-32		YLL045C	0.703462	2.72405e-26	1.05164e-25		YLL045C	-0.0557194	0.401668	0.788676		YLL045C	-0.146638	0.0266056	0.157741
YER040W	-0.111868	0.454806	0.999031		YER040W	-1.04893	2.33423e-24	7.54227e-24		YER040W	-0.937064	6.18932e-18	1.82929e-17		YER040W	0.0805563	0.508583	0.83489		YER040W	0.192424	0.026798	0.158603
YOR253W	0.11696	0.411896	0.999031		YOR253W	1.62905	7.41527e-60	5.33071e-59		YOR253W	1.51209	5.71526e-50	4.18131e-49		YOR253W	-0.0963582	0.358791	0.756668		YOR253W	-0.213319	0.0268928	0.158984
YPR042C	-0.168656	0.219658	0.982177		YPR042C	-1.23018	3.67435e-38	1.69701e-37		YPR042C	-1.06152	8.32167e-27	3.27379e-26		YPR042C	0.0119954	0.913548	0.976864		YPR042C	0.180651	0.0269867	0.159359
YOR341W	-0.0460265	0.610361	0.999031		YOR341W	-1.20257	2.53989e-79	2.55179e-78		YOR341W	-1.15655	4.61453e-73	5.22589e-72		YOR341W	-0.182776	0.0054684	0.103421		YOR341W	-0.13675	0.0271281	0.160013
YGR116W	-0.181116	0.0627502	0.771169		YGR116W	0.121943	0.0745938	0.0884622		YGR116W	0.303059	1.20375e-05	2.01391e-05		YGR116W	-0.0352775	0.620926	0.883523		YGR116W	0.145838	0.0276093	0.162604
YMR301C	0.0383849	0.767919	0.999031		YMR301C	-0.973588	1.33277e-26	4.58002e-26		YMR301C	-1.01197	1.01699e-27	4.10129e-27		YMR301C	-0.137084	0.182464	0.589169		YMR301C	-0.175468	0.0276296	0.162604
YOR095C	0.069573	0.60336	0.999031		YOR095C	1.03463	4.65254e-28	1.65994e-27		YOR095C	0.965059	3.60333e-24	1.30573e-23		YOR095C	-0.130459	0.184667	0.593479		YOR095C	-0.200032	0.0277212	0.162959
YGL211W	0.163213	0.353084	0.999031		YGL211W	0.548494	7.99795e-06	1.28746e-05		YGL211W	0.385282	0.0021771	0.00307365		YGL211W	-0.0810547	0.551882	0.8511		YGL211W	-0.244268	0.0278178	0.16317
YIL131C	0.126422	0.371926	0.999031		YIL131C	-0.110451	0.263216	0.290692		YIL131C	-0.236873	0.019608	0.0251377		YIL131C	-0.0633828	0.572351	0.859784		YIL131C	-0.189805	0.0278195	0.16317
YDR098C-B	-0.426253	0.000912304	0.0653327		YDR098C-B	-7.15318	0	0		YDR098C-B	-6.72692	0	0		YDR098C-B	-0.243278	0.0129866	0.178342		YDR098C-B	0.182975	0.0279532	0.16341
YGR233C	-0.171957	0.142898	0.927907		YGR233C	-1.32098	2.27999e-58	1.6032e-57		YGR233C	-1.14903	1.24426e-42	7.66012e-42		YGR233C	-0.00771498	0.93207	0.982068		YGR233C	0.164242	0.0279542	0.16341
YIL083C	0.179922	0.218673	0.982177		YIL083C	0.228534	0.0250571	0.0311304		YIL083C	0.0486115	0.642877	0.672146		YIL083C	-0.0226232	0.842141	0.961997		YIL083C	-0.202546	0.0279444	0.16341
YKR081C	-0.0332001	0.792151	0.999031		YKR081C	2.38416	4.13135e-159	9.75842e-158		YKR081C	2.41736	8.46866e-161	2.43822e-159		YKR081C	-0.228543	0.0103835	0.157953		YKR081C	-0.195343	0.0281643	0.164455
YDR363W-A	0.556306	0.00403953	0.175838		YDR363W-A	3.7802	1.76988e-172	4.51202e-171		YDR363W-A	3.22389	1.10153e-119	2.26047e-118		YDR363W-A	0.238117	0.0628449	0.378175		YDR363W-A	-0.318189	0.0283226	0.164527
YOR187W	0.111948	0.289456	0.999031		YOR187W	0.404405	5.59739e-08	1.01067e-07		YOR187W	0.292457	9.6273e-05	0.000151189		YOR187W	-0.047483	0.535655	0.845596		YOR187W	-0.159431	0.0283971	0.164527
YGR038C-A	-0.190327	0.109239	0.884702		YGR038C-A	-3.27287	0	0		YGR038C-A	-3.08254	4.65048e-296	3.16616e-294		YGR038C-A	-0.343056	0.000365484	0.0180716		YGR038C-A	-0.152729	0.0283883	0.164527
YML116W-A	-0.667264	0.0507451	0.699192		YML116W-A	-2.99372	6.73143e-35	2.85592e-34		YML116W-A	-2.32646	3.33794e-22	1.143e-21		YML116W-A	-0.35959	0.248185	#N/A		YML116W-A	0.307673	0.0283323	0.164527
YBR070C	0.0846845	0.752971	#N/A		YBR070C	1.59512	5.49642e-17	1.43537e-16		YBR070C	1.51044	1.92148e-15	5.17671e-15		YBR070C	-0.305145	0.130824	#N/A		YBR070C	-0.38983	0.0283376	0.164527
YNR003C	0.056037	0.665072	0.999031		YNR003C	1.09784	1.23608e-33	5.06244e-33		YNR003C	1.04181	1.36081e-29	5.82038e-29		YNR003C	-0.132873	0.169102	0.566621		YNR003C	-0.18891	0.0282747	0.164527
YCR028C	0.193346	0.246363	0.986566		YCR028C	-0.930238	7.09238e-16	1.77832e-15		YCR028C	-1.12358	1.14104e-20	3.71593e-20		YCR028C	-0.00851181	0.951203	0.985402		YCR028C	-0.201858	0.0283061	0.164527
YDR492W	-0.0336396	0.801023	0.999031		YDR492W	-0.339791	0.000297723	0.000435522		YDR492W	-0.306152	0.00124456	0.0017925		YDR492W	-0.216424	0.0377522	0.291931		YDR492W	-0.182784	0.0285023	0.164789
YEL066W	0.178197	0.233236	0.982177		YEL066W	1.78756	8.80665e-66	6.99096e-65		YEL066W	1.60937	4.28931e-51	3.21532e-50		YEL066W	-0.0431734	0.695065	0.912623		YEL066W	-0.22137	0.0285054	0.164789
YOR246C	0.0634135	0.682942	0.999031		YOR246C	-0.121209	0.264407	0.291896		YOR246C	-0.184622	0.0960877	0.1139		YOR246C	-0.140053	0.259833	0.677653		YOR246C	-0.203467	0.028732	0.165915
YDR079C-A	0.707286	0.0896888	#N/A		YDR079C-A	3.82527	1.30974e-37	5.9681e-37		YDR079C-A	3.11798	8.40891e-27	3.30587e-26		YDR079C-A	0.000994798	0.996986	#N/A		YDR079C-A	-0.706291	0.0287903	0.166069
YGR194C	-0.301043	0.207885	0.982177		YGR194C	-0.554294	0.000738279	0.00104588		YGR194C	-0.253252	0.144795	0.168462		YGR194C	-0.00651025	0.973695	#N/A		YGR194C	0.294532	0.0288314	0.166122
YKL085W	0.071928	0.480294	0.999031		YKL085W	1.16976	7.15181e-61	5.23893e-60		YKL085W	1.09783	4.55533e-51	3.40591e-50		YKL085W	0.224193	0.00256216	0.0641165		YKL085W	0.152265	0.0289278	0.166494
YOR001W	0.0530681	0.679099	0.999031		YOR001W	-0.118661	0.188017	0.212344		YOR001W	-0.171729	0.0599099	0.0728359		YOR001W	-0.129253	0.184292	0.592738		YOR001W	-0.182321	0.0290615	0.167079
YDL111C	0.15875	0.240842	0.982177		YDL111C	-0.390436	3.55299e-05	5.50058e-05		YDL111C	-0.549186	1.48333e-08	2.91776e-08		YDL111C	-0.024942	0.813911	0.959176		YDL111C	-0.183692	0.0291575	0.167188
YOR208W	-0.222676	0.286186	0.999031		YOR208W	-2.63624	7.1882e-76	6.77494e-75		YOR208W	-2.41356	1.06734e-56	8.93874e-56		YOR208W	-0.0156802	0.932802	0.982068		YOR208W	0.206996	0.029206	0.167188
YBL063W	-0.346339	0.0719401	0.809403		YBL063W	-0.617215	3.80933e-06	6.27158e-06		YBL063W	-0.270876	0.050636	0.062175		YBL063W	-0.104888	0.505236	0.833174		YBL063W	0.241451	0.0292083	0.167188
YHR132C	0.0519481	0.635894	0.999031		YHR132C	0.620448	7.61039e-16	1.90573e-15		YHR132C	0.5685	3.57809e-13	8.78134e-13		YHR132C	-0.10588	0.199266	0.616732		YHR132C	-0.157829	0.0291618	0.167188
YHR018C	0.0760466	0.538448	0.999031		YHR018C	1.89697	3.05865e-105	4.34899e-104		YHR018C	1.82092	1.23742e-95	1.94592e-94		YHR018C	-0.112078	0.205167	0.624278		YHR018C	-0.188125	0.0293623	0.167885
YDR352W	0.227991	0.158777	0.951618		YDR352W	0.601444	9.45013e-08	1.68842e-07		YDR352W	0.373452	0.00129502	0.00186194		YDR352W	0.00375134	0.976008	0.993165		YDR352W	-0.22424	0.0295304	0.168172
YDR494W	-0.125846	0.419809	0.999031		YDR494W	0.606778	1.8911e-08	3.48751e-08		YDR494W	0.732624	7.75575e-11	1.7203e-10		YDR494W	0.0951202	0.421876	0.794939		YDR494W	0.220967	0.029521	0.168172
YJL066C	-0.0146607	0.930857	0.999031		YJL066C	0.102325	0.373251	0.403286		YJL066C	0.116986	0.34494	0.377848		YJL066C	0.20565	0.128465	0.514862		YJL066C	0.22031	0.0295411	0.168172
YCR033W	-0.203886	0.151209	0.941618		YCR033W	-1.40572	5.29304e-46	2.92558e-45		YCR033W	-1.20183	5.79397e-32	2.6443e-31		YCR033W	-0.0191575	0.866468	0.964392		YCR033W	0.184729	0.0294595	0.168172
YOR219C	-0.279201	0.0841341	0.838129		YOR219C	-1.61895	3.126e-47	1.77355e-46		YOR219C	-1.33975	1.19465e-30	5.23747e-30		YOR219C	-0.0897688	0.509579	0.835822		YOR219C	0.189432	0.0298141	0.169357
YNR016C	-0.0260658	0.789989	0.999031		YNR016C	-0.484521	2.49502e-12	5.45679e-12		YNR016C	-0.458455	3.54008e-11	7.93433e-11		YNR016C	-0.175564	0.0116535	0.169595		YNR016C	-0.149498	0.0298077	0.169357
YBR212W	0.0323495	0.792759	0.999031		YBR212W	0.0943904	0.269752	0.297287		YBR212W	0.0620409	0.483663	0.517176		YBR212W	0.208223	0.024722	0.246859		YBR212W	0.175873	0.0299418	0.169898
YOR202W	0.308415	0.309921	#N/A		YOR202W	0.735524	0.000518675	0.000742045		YOR202W	0.427108	0.0496758	0.0610348		YOR202W	-0.0873169	0.719208	#N/A		YOR202W	-0.395733	0.0300429	0.170286
YNL180C	-0.108518	0.469302	0.999031		YNL180C	-0.410493	7.79669e-05	0.000118021		YNL180C	-0.301975	0.005229	0.00709502		YNL180C	0.0961829	0.40923	0.788676		YNL180C	0.204701	0.0300759	0.170289
YGR071C	-0.215295	0.237933	0.982177		YGR071C	-0.964491	1.58408e-14	3.78335e-14		YGR071C	-0.749196	1.49871e-08	2.94601e-08		YGR071C	0.00512011	0.973032	0.993165		YGR071C	0.220415	0.0301888	0.170743
YPL036W	0.0846661	0.52922	0.999031		YPL036W	5.21575	0	0		YPL036W	5.13108	0	0		YPL036W	-0.147759	0.068837	0.391827		YPL036W	-0.232426	0.0302913	0.170953
YIR023W	-0.261863	0.0753527	0.822067		YIR023W	-2.15513	1.87329e-98	2.45266e-97		YIR023W	-1.89327	1.66298e-71	1.84009e-70		YIR023W	-0.0886341	0.4735	0.818542		YIR023W	0.173229	0.0302745	0.170953
YDR222W	0.127739	0.475268	0.999031		YDR222W	0.459949	0.000137839	0.00020563		YDR222W	0.332211	0.0119194	0.0156129		YDR222W	0.364805	0.00988425	0.153655		YDR222W	0.237066	0.0305783	0.171094
YDR452W	-0.0399751	0.769089	0.999031		YDR452W	-0.55832	2.48337e-09	4.76975e-09		YDR452W	-0.518345	1.58025e-07	2.94522e-07		YDR452W	0.137505	0.205804	0.624278		YDR452W	0.17748	0.0305086	0.171094
YLR149C	-0.0811797	0.817534	#N/A		YLR149C	-1.08346	3.52274e-06	5.80966e-06		YLR149C	-1.00228	0.000139312	0.000215676		YLR149C	0.310953	0.302438	#N/A		YLR149C	0.392133	0.0305677	0.171094
YJL074C	-0.199401	0.134124	0.916564		YJL074C	1.07413	4.67657e-31	1.80182e-30		YJL074C	1.27353	1.54581e-40	8.99054e-40		YJL074C	-0.0056217	0.954497	0.986714		YJL074C	0.193779	0.0303899	0.171094
YHR007C	-0.0677813	0.469945	0.999031		YHR007C	-0.481007	3.95369e-13	8.95498e-13		YHR007C	-0.413226	4.8139e-10	1.02532e-09		YHR007C	-0.209154	0.00190109	0.0523628		YHR007C	-0.141373	0.030364	0.171094
YHR190W	0.0313868	0.759399	0.999031		YHR190W	1.38309	9.94245e-82	1.04045e-80		YHR190W	1.3517	3.6628e-77	4.44374e-76		YHR190W	-0.122613	0.0962607	0.463135		YHR190W	-0.154	0.0305196	0.171094
YIL158W	-0.0103455	0.958514	0.999031		YIL158W	-0.294512	0.0354533	0.0434035		YIL158W	-0.284166	0.0442015	0.0546452		YIL158W	-0.254143	0.120893	0.498812		YIL158W	-0.243797	0.0305498	0.171094
YIR039C	-0.573504	0.040775	#N/A		YIR039C	-1.0098	2.64398e-07	4.62396e-07		YIR039C	-0.436293	0.0293457	0.0369262		YIR039C	-0.244315	0.299349	#N/A		YIR039C	0.329189	0.0305623	0.171094
YOR108W	0.00474464	0.961432	0.999031		YOR108W	-0.636772	3.23557e-20	9.35744e-20		YOR108W	-0.641517	3.14475e-20	1.00824e-19		YOR108W	-0.137527	0.0583311	0.366531		YOR108W	-0.142271	0.0309953	0.171872
YGR180C	-0.104127	0.392559	0.999031		YGR180C	0.309093	0.00033066	0.000482483		YGR180C	0.41322	1.60843e-06	2.82832e-06		YGR180C	-0.288276	0.000905173	0.0323207		YGR180C	-0.184149	0.0309753	0.171872
YLR144C	0.0420851	0.770923	0.999031		YLR144C	-0.958791	1.64931e-22	5.07959e-22		YLR144C	-1.00088	3.76491e-21	1.24643e-20		YLR144C	0.218938	0.0660482	0.385579		YLR144C	0.176853	0.0307746	0.171872
YLR231C	-0.0787838	0.670762	0.999031		YLR231C	0.48063	0.000244794	0.000359641		YLR231C	0.559414	1.96578e-05	3.23641e-05		YLR231C	-0.326833	0.0245758	0.2466		YLR231C	-0.24805	0.0309079	0.171872
YNL027W	0.0238381	0.859266	0.999031		YNL027W	0.181823	0.0498295	0.0602515		YNL027W	0.157985	0.104712	0.123743		YNL027W	0.209221	0.0429961	0.312311		YNL027W	0.185383	0.0310123	0.171872
YJL070C	-0.187861	0.41423	0.999031		YJL070C	-1.00742	1.33275e-10	2.71666e-10		YJL070C	-0.819559	1.12693e-06	1.99864e-06		YJL070C	0.0779897	0.688183	#N/A		YJL070C	0.26585	0.0309234	0.171872
YKL125W	0.0859742	0.571399	0.999031		YKL125W	0.237762	0.0255264	0.0316931		YKL125W	0.151788	0.161245	0.186215		YKL125W	-0.122175	0.297672	0.713728		YKL125W	-0.208149	0.0309951	0.171872
YCL026C-B	0.315036	0.150628	0.941618		YCL026C-B	1.20735	2.69748e-15	6.62859e-15		YCL026C-B	0.892316	1.37389e-08	2.70892e-08		YCL026C-B	0.00770109	0.963152	0.990463		YCL026C-B	-0.307335	0.030811	0.171872
YCR081W	-0.00989671	0.953653	0.999031		YCR081W	-1.63775	7.27459e-46	4.00171e-45		YCR081W	-1.62785	1.55381e-38	8.5312e-38		YCR081W	0.181569	0.211481	0.626282		YCR081W	0.191466	0.0310133	0.171872
YOL048C	-0.178379	0.524353	#N/A		YOL048C	-1.05516	2.48546e-08	4.55747e-08		YOL048C	-0.876778	2.19154e-05	3.59786e-05		YOL048C	0.13312	0.579095	#N/A		YOL048C	0.311498	0.0312317	0.172787
YLR425W	-0.100971	0.620518	0.999031		YLR425W	-1.63629	3.28245e-32	1.30285e-31		YLR425W	-1.53532	1.10517e-24	4.06588e-24		YLR425W	0.126373	0.468932	0.818542		YLR425W	0.227344	0.0312446	0.172787
YPL265W	-0.0710846	0.571688	0.999031		YPL265W	-0.111297	0.209994	0.235328		YPL265W	-0.0402121	0.651271	0.679716		YPL265W	-0.256088	0.00523613	0.100416		YPL265W	-0.185004	0.0313357	0.173108
YHR045W	-0.0380707	0.813302	0.999031		YHR045W	-0.697304	7.93606e-10	1.55999e-09		YHR045W	-0.659233	8.5843e-09	1.71242e-08		YHR045W	-0.239547	0.0678207	0.390373		YHR045W	-0.201476	0.0315366	0.174034
YDL060W	0.0340971	0.780588	0.999031		YDL060W	-0.0326573	0.704759	0.729334		YDL060W	-0.0667543	0.442495	0.476412		YDL060W	-0.141838	0.119081	0.49758		YDL060W	-0.175935	0.0316367	0.174402
YLR312W-A	-0.123181	0.390707	0.999031		YLR312W-A	0.409113	3.58009e-05	5.54104e-05		YLR312W-A	0.532294	3.01334e-07	5.52891e-07		YLR312W-A	0.0713699	0.521466	0.838924		YLR312W-A	0.194551	0.0316981	0.174557
YDR045C	0.586058	0.0155802	0.388281		YDR045C	5.18531	1.18481e-201	3.62778e-200		YDR045C	4.59925	2.40003e-158	6.77511e-157		YDR045C	0.144074	0.26002	0.677653		YDR045C	-0.441984	0.0317424	0.174616
YIL133C	0.145206	0.140866	0.927907		YIL133C	1.06213	1.63129e-52	1.03512e-51		YIL133C	0.91692	2.06922e-39	1.16825e-38		YIL133C	-0.00360919	0.958947	0.989085		YIL133C	-0.148815	0.0318417	0.174979
YGR038C-B	-0.487902	0.000162621	0.0171913		YGR038C-B	-7.22849	0	0		YGR038C-B	-6.74059	0	0		YGR038C-B	-0.308017	0.00175114	0.0495634		YGR038C-B	0.179884	0.0321976	0.176748
YHR077C	-0.302484	0.0361647	0.590336		YHR077C	-0.605415	1.79891e-09	3.47473e-09		YHR077C	-0.302931	0.00342756	0.00473058		YHR077C	-0.116483	0.312377	0.723882		YHR077C	0.186001	0.0323112	0.177186
YER086W	-0.0299835	0.744528	0.999031		YER086W	-0.935524	3.60055e-47	2.03282e-46		YER086W	-0.905541	9.15274e-44	5.78242e-43		YER086W	-0.16163	0.0180943	0.206466		YER086W	-0.131647	0.0324894	0.177977
YBR081C	-0.330719	0.0211527	0.445884		YBR081C	-0.515871	2.60859e-07	4.56484e-07		YBR081C	-0.185151	0.0714096	0.0860752		YBR081C	-0.144845	0.204316	0.622966		YBR081C	0.185875	0.0325448	0.178094
YPR113W	0.150648	0.195522	0.982177		YPR113W	1.37258	6.5116e-64	5.01766e-63		YPR113W	1.22193	9.10191e-49	6.48679e-48		YPR113W	-0.0162567	0.850565	0.962932		YPR113W	-0.166905	0.0325836	0.178119
YDR161W	0.0123968	0.929627	0.999031		YDR161W	1.22621	2.38967e-35	1.02971e-34		YDR161W	1.21381	4.13583e-34	2.01805e-33		YDR161W	-0.191089	0.063801	0.38058		YDR161W	-0.203486	0.0326878	0.17813
YDR529C	0.0448879	0.707512	0.999031		YDR529C	0.392805	2.50488e-06	4.16066e-06		YDR529C	0.347917	4.95278e-05	7.94393e-05		YDR529C	0.216983	0.0141756	0.18387		YDR529C	0.172095	0.032624	0.17813
YPR072W	-0.135736	0.260342	0.992666		YPR072W	0.908485	4.19125e-27	1.46025e-26		YPR072W	1.04422	1.0056e-33	4.86168e-33		YPR072W	0.038934	0.660474	0.900048		YPR072W	0.17467	0.0326656	0.17813
YEL060C	0.0186397	0.85355	0.999031		YEL060C	-0.00519948	0.941346	0.946924		YEL060C	-0.0238391	0.741027	0.764407		YEL060C	0.164242	0.0274083	0.256227		YEL060C	0.145602	0.0327741	0.178228
YFL045C	-0.0241799	0.806494	0.999031		YFL045C	1.07851	5.75414e-54	3.71643e-53		YFL045C	1.10269	4.18831e-56	3.4576e-55		YFL045C	-0.171933	0.0145785	0.185808		YFL045C	-0.147753	0.0327703	0.178228
YER044C	0.0457371	0.767732	0.999031		YER044C	0.0226656	0.835589	0.85088		YER044C	-0.0230715	0.833564	0.851215		YER044C	-0.177817	0.119024	0.49758		YER044C	-0.223555	0.0328158	0.17827
YIL002W-A	0.49114	0.0857445	#N/A		YIL002W-A	4.26184	1.99177e-98	2.59604e-97		YIL002W-A	3.7707	6.82218e-78	8.38215e-77		YIL002W-A	0.000114027	0.999463	#N/A		YIL002W-A	-0.491026	0.0328621	0.178336
YJL050W	-0.0396778	0.698266	0.999031		YJL050W	0.430798	2.38706e-09	4.58934e-09		YJL050W	0.470476	9.0083e-11	1.99278e-10		YJL050W	-0.18838	0.0119349	0.171863		YJL050W	-0.148702	0.0329417	0.178582
YEL054C	0.0988095	0.3156	0.999031		YEL054C	1.04812	2.72667e-51	1.68402e-50		YEL054C	0.949307	2.84792e-42	1.73769e-41		YEL054C	-0.0490124	0.48323	0.821817		YEL054C	-0.147822	0.0330113	0.178774
YDR159W	-0.148509	0.386237	0.999031		YDR159W	-1.45146	8.41461e-35	3.55181e-34		YDR159W	-1.30295	1.09879e-25	4.16963e-25		YDR159W	0.0576268	0.68381	0.908206		YDR159W	0.206136	0.0330782	0.178951
YGR181W	0.317632	0.0574393	0.745704		YGR181W	3.31536	1.88456e-178	4.93482e-177		YGR181W	2.99773	9.96606e-138	2.40307e-136		YGR181W	0.0525947	0.63764	0.889489		YGR181W	-0.265037	0.033151	0.178991
YNR040W	-0.109342	0.570999	0.999031		YNR040W	-0.458376	0.000489104	0.000702344		YNR040W	-0.349035	0.0134921	0.0175893		YNR040W	0.123625	0.436854	0.80517		YNR040W	0.232967	0.0331703	0.178991
YEL040W	-0.0100776	0.919877	0.999031		YEL040W	-0.233872	0.000946101	0.0013289		YEL040W	-0.223794	0.00160808	0.00229606		YEL040W	-0.157906	0.0288419	0.259577		YEL040W	-0.147829	0.0331884	0.178991
YDL022W	0.0690702	0.691314	0.999031		YDL022W	1.51741	1.72619e-35	7.45482e-35		YDL022W	1.44834	1.51894e-31	6.85122e-31		YDL022W	0.327775	0.00841917	0.137658		YDL022W	0.258704	0.0333532	0.179266
YOR227W	0.188931	0.241957	0.982177		YOR227W	-1.98253	2.41078e-75	2.2648e-74		YOR227W	-2.17147	4.32413e-73	4.90662e-72		YOR227W	0.371845	0.00652308	0.115391		YOR227W	0.182914	0.0332981	0.179266
YLL018C	0.00992343	0.920943	0.999031		YLL018C	0.458481	8.50325e-11	1.75181e-10		YLL018C	0.448558	2.33166e-10	5.04422e-10		YLL018C	-0.138947	0.051739	0.347339		YLL018C	-0.148871	0.0333648	0.179266
YHR102W	0.0548893	0.709184	0.999031		YHR102W	-1.56035	3.33537e-54	2.16388e-53		YHR102W	-1.61524	3.85515e-51	2.89361e-50		YHR102W	0.238495	0.0454455	0.322679		YHR102W	0.183606	0.0333766	0.179266
YOL110W	1.30008	0.000703919	#N/A		YOL110W	0.105224	0.665911	0.692351		YOL110W	-1.19486	5.54876e-05	8.86056e-05		YOL110W	0.871671	0.00760655	#N/A		YOL110W	-0.428412	0.0334636	0.179549
YOL006C	-0.271378	0.0324455	0.547749		YOL006C	0.892969	6.95264e-24	2.21314e-23		YOL006C	1.16435	1.23595e-37	6.66582e-37		YOL006C	-0.0910344	0.334412	0.744474		YOL006C	0.180343	0.0336003	0.180098
YJR033C	-0.0676354	0.672567	0.999031		YJR033C	-1.89662	7.02029e-68	5.779e-67		YJR033C	-1.82899	7.07953e-55	5.72196e-54		YJR033C	0.106897	0.43633	0.80517		YJR033C	0.174532	0.0336728	0.180301
YML067C	0.116949	0.403184	0.999031		YML067C	0.156881	0.108007	0.125383		YML067C	0.0399313	0.690313	0.717336		YML067C	-0.0670759	0.541168	0.847107		YML067C	-0.184025	0.0338527	0.181079
YJR133W	0.0664015	0.64847	0.999031		YJR133W	0.751899	1.58195e-13	3.63573e-13		YJR133W	0.685498	4.53034e-11	1.01342e-10		YJR133W	-0.129412	0.25071	0.668143		YJR133W	-0.195814	0.0338957	0.181124
YOL103W-B	-0.225044	0.0722019	0.809403		YOL103W-B	-5.37427	0	0		YOL103W-B	-5.14923	0	0		YOL103W-B	-0.0459895	0.618613	0.88301		YOL103W-B	0.179054	0.0340159	0.181379
YML045W-A	-0.145639	0.192522	0.977774		YML045W-A	-2.0805	7.48957e-153	1.64799e-151		YML045W-A	-1.93486	2.66362e-132	6.21546e-131		YML045W-A	-0.296539	0.000573395	0.0230707		YML045W-A	-0.1509	0.0341699	0.181379
YBL050W	0.355052	0.00580076	0.220132		YBL050W	2.74351	9.62265e-207	3.01007e-205		YBL050W	2.38846	8.0061e-147	2.04103e-145		YBL050W	0.161011	0.0748931	0.409468		YBL050W	-0.194041	0.034146	0.181379
YBR141C	0.280046	0.198811	0.982177		YBR141C	0.850938	1.81437e-08	3.34813e-08		YBR141C	0.570893	0.000276335	0.000418517		YBR141C	-0.00450506	0.97907	#N/A		YBR141C	-0.284551	0.0339797	0.181379
YBR205W	0.199554	0.0757743	0.822067		YBR205W	0.377921	1.44525e-06	2.4391e-06		YBR205W	0.178367	0.0266787	0.0337448		YBR205W	0.0443745	0.602488	0.876862		YBR205W	-0.15518	0.0341978	0.181379
YJL036W	-0.252547	0.134128	0.916564		YJL036W	0.894948	1.60477e-14	3.83119e-14		YJL036W	1.14749	4.5052e-21	1.48472e-20		YJL036W	-0.0207878	0.871212	0.964392		YJL036W	0.231759	0.0342211	0.181379
YER034W	0.303778	0.154631	0.945093		YER034W	1.66848	3.0439e-29	1.11913e-28		YER034W	1.3647	5.09718e-19	1.56734e-18		YER034W	0.00411107	0.979481	#N/A		YER034W	-0.299667	0.0340902	0.181379
YAL001C	-0.0496755	0.786732	0.999031		YAL001C	-0.0767321	0.540353	0.57052		YAL001C	-0.0270565	0.8402	0.857386		YAL001C	0.18413	0.209597	0.625008		YAL001C	0.233805	0.0340866	0.181379
YLR262C	0.0398388	0.820749	0.999031		YLR262C	2.0223	3.70094e-60	2.68052e-59		YLR262C	1.98246	1.29828e-56	1.08259e-55		YLR262C	-0.216467	0.0894916	0.444626		YLR262C	-0.256306	0.034297	0.181597
YHR208W	0.0509072	0.642687	0.999031		YHR208W	-0.315451	4.72746e-05	7.25287e-05		YHR208W	-0.366359	2.37798e-06	4.13626e-06		YHR208W	-0.111809	0.152958	0.548245		YHR208W	-0.162717	0.0344359	0.182148
YBR118W	0.0840605	0.394845	0.999031		YBR118W	0.360291	2.50031e-07	4.38317e-07		YBR118W	0.276231	7.68525e-05	0.000121283		YBR118W	-0.0635631	0.363045	0.75973		YBR118W	-0.147624	0.0345343	0.182483
YML129C	0.468984	0.0134505	0.35689		YML129C	1.92715	1.06816e-48	6.26284e-48		YML129C	1.45817	1.69487e-26	6.60043e-26		YML129C	0.198199	0.156685	0.549402		YML129C	-0.270785	0.0345908	0.182597
YER120W	0.128323	0.180533	0.971926		YER120W	-0.109135	0.105996	0.123123		YER120W	-0.237458	0.000479695	0.000711429		YER120W	-0.0108947	0.875525	0.964749		YER120W	-0.139218	0.0346911	0.182942
YDR044W	-0.0597642	0.654469	0.999031		YDR044W	0.767793	3.19473e-16	8.12656e-16		YDR044W	0.827557	2.59136e-18	7.762e-18		YDR044W	-0.244029	0.0157582	0.191094		YDR044W	-0.184264	0.0347328	0.182978
YPR183W	0.077559	0.429553	0.999031		YPR183W	1.24951	7.55881e-73	6.72967e-72		YPR183W	1.17195	1.46289e-63	1.39698e-62		YPR183W	-0.0665989	0.344566	0.750057		YPR183W	-0.144158	0.0349907	0.183791
YMR011W	0.122894	0.318735	0.999031		YMR011W	0.503652	7.16309e-09	1.34369e-08		YMR011W	0.380759	1.28556e-05	2.14829e-05		YMR011W	-0.0589515	0.503318	0.833174		YMR011W	-0.181845	0.0349335	0.183791
YER071C	0.625834	0.0121579	#N/A		YER071C	1.78199	2.44097e-25	8.10436e-25		YER071C	1.15616	1.88795e-10	4.11354e-10		YER071C	0.281167	0.136004	#N/A		YER071C	-0.344667	0.0349928	0.183791
YJR137C	0.0206288	0.855803	0.999031		YJR137C	0.00156575	0.984407	0.986111		YJR137C	-0.0190631	0.812635	0.832486		YJR137C	-0.144394	0.0787719	0.419669		YJR137C	-0.165023	0.0351957	0.184671
YMR304W	-0.0670236	0.635557	0.999031		YMR304W	-0.570462	4.95425e-09	9.36324e-09		YMR304W	-0.503438	8.83137e-07	1.57592e-06		YMR304W	0.114442	0.307384	0.720036		YMR304W	0.181465	0.035273	0.184891
YOL092W	0.0138015	0.906413	0.999031		YOL092W	-0.792099	8.53657e-22	2.57566e-21		YOL092W	-0.805901	4.58868e-22	1.56112e-21		YOL092W	-0.14633	0.101578	0.470517		YOL092W	-0.160131	0.0353992	0.184921
YGL190C	-0.0994874	0.475139	0.999031		YGL190C	-0.510132	1.17969e-07	2.09864e-07		YGL190C	-0.410644	4.50811e-05	7.25283e-05		YGL190C	0.0804641	0.464272	0.81815		YGL190C	0.179951	0.0354203	0.184921
YGR012W	0.201623	0.202657	0.982177		YGR012W	0.375179	0.000648458	0.000922248		YGR012W	0.173555	0.127141	0.148974		YGR012W	-0.00475318	0.96947	0.993165		YGR012W	-0.206377	0.0353843	0.184921
YPL016W	-0.0962575	0.441234	0.999031		YPL016W	-0.667236	1.77558e-14	4.23198e-14		YPL016W	-0.570979	1.95252e-10	4.24784e-10		YPL016W	0.0724416	0.450001	0.809039		YPL016W	0.168699	0.0353479	0.184921
YML114C	-0.0801983	0.607333	0.999031		YML114C	-1.29923	5.50742e-34	2.28142e-33		YML114C	-1.21903	8.06274e-27	3.17625e-26		YML114C	0.10317	0.425342	0.796919		YML114C	0.183369	0.035511	0.18521
YOR312C	0.14434	0.18344	0.971926		YOR312C	1.25153	7.04333e-60	5.06962e-59		YOR312C	1.10719	3.73483e-47	2.53977e-46		YOR312C	-0.0164502	0.830647	0.961997		YOR312C	-0.160791	0.035653	0.185396
YPR080W	0.0822875	0.403976	0.999031		YPR080W	0.350922	4.81983e-07	8.31615e-07		YPR080W	0.268635	0.000116788	0.000182318		YPR080W	-0.0641617	0.357582	0.756255		YPR080W	-0.146449	0.0356255	0.185396
YBR181C	0.114286	0.251002	0.986566		YBR181C	1.62656	3.33671e-118	5.47012e-117		YBR181C	1.51227	2.80156e-102	4.72671e-101		YBR181C	-0.0334136	0.635505	0.888084		YBR181C	-0.1477	0.0356505	0.185396
YPR137C-B	-0.137993	0.229128	0.982177		YPR137C-B	-5.13055	0	0		YPR137C-B	-4.99255	0	0		YPR137C-B	0.0284436	0.731775	0.930159		YPR137C-B	0.166436	0.0357108	0.185512
YGL066W	-0.131072	0.367219	0.999031		YGL066W	0.671054	2.16215e-11	4.55161e-11		YGL066W	0.802126	2.54756e-14	6.52912e-14		YGL066W	0.0637549	0.568466	0.857393		YGL066W	0.194827	0.0360061	0.186674
YPL218W	0.0402044	0.71111	0.999031		YPL218W	0.836117	8.80276e-28	3.1176e-27		YPL218W	0.795913	4.69097e-25	1.75027e-24		YPL218W	-0.117107	0.135561	0.520639		YPL218W	-0.157312	0.0359898	0.186674
YOR261C	0.155125	0.165977	0.955822		YOR261C	1.48542	5.40062e-80	5.50236e-79		YOR261C	1.3303	3.40293e-62	3.15589e-61		YOR261C	-0.00473489	0.953914	0.986608		YOR261C	-0.15986	0.0362555	0.187764
YPR114W	0.0369477	0.782204	0.999031		YPR114W	-0.52274	2.68431e-08	4.9143e-08		YPR114W	-0.559688	3.83624e-09	7.82529e-09		YPR114W	-0.145207	0.152364	0.547642		YPR114W	-0.182155	0.0362881	0.187764
YJL204C	-0.165784	0.305864	0.999031		YJL204C	-0.0301215	0.78766	0.807576		YJL204C	0.135662	0.246582	0.276866		YJL204C	0.0433826	0.733429	0.930159		YJL204C	0.209166	0.0363524	0.187911
YDR280W	0.0259315	0.867455	0.999031		YDR280W	1.4626	6.41296e-41	3.15041e-40		YDR280W	1.43667	1.2943e-38	7.12665e-38		YDR280W	-0.192353	0.0946877	0.458253		YDR280W	-0.218284	0.0364999	0.187929
YDR399W	-0.209469	0.0597556	0.748961		YDR399W	0.891288	9.3111e-30	3.46739e-29		YDR399W	1.10076	1.82661e-44	1.16931e-43		YDR399W	-0.368483	5.74282e-06	0.000666284		YDR399W	-0.159014	0.0364763	0.187929
YMR050C	-0.510655	4.61436e-05	0.00640242		YMR050C	-6.80657	0	0		YMR050C	-6.29592	0	0		YMR050C	-0.337332	0.000333692	0.0174641		YMR050C	0.173323	0.0364872	0.187929
YJR145C	0.0432956	0.62384	0.999031		YJR145C	1.20738	2.11805e-83	2.26146e-82		YJR145C	1.16408	1.50443e-77	1.83674e-76		YJR145C	-0.0870663	0.163912	0.5569		YJR145C	-0.130362	0.0364081	0.187929
YHR041C	0.106338	0.494996	0.999031		YHR041C	-0.611055	1.72973e-08	3.19398e-08		YHR041C	-0.717393	1.47509e-10	3.22979e-10		YHR041C	-0.0793316	0.535496	0.845596		YHR041C	-0.18567	0.0366233	0.188379
YEL039C	-0.32928	0.365061	#N/A		YEL039C	4.86076	2.47066e-104	3.47032e-103		YEL039C	5.19004	1.83379e-73	2.08901e-72		YEL039C	0.33536	0.0565335	#N/A		YEL039C	0.66464	0.0367117	0.188648
YBR097W	0.0572718	0.769999	0.999031		YBR097W	-1.41908	3.5882e-27	1.25241e-26		YBR097W	-1.47636	2.83293e-24	1.03108e-23		YBR097W	0.271972	0.102818	0.47465		YBR097W	0.2147	0.0368241	0.188669
YHR054C	-0.0543803	0.763184	0.999031		YHR054C	-0.414589	0.00112973	0.0015784		YHR054C	-0.360209	0.00486209	0.00662357		YHR054C	-0.277079	0.0570231	0.362704		YHR054C	-0.222699	0.036815	0.188669
YCL011C	0.124784	0.282274	0.999031		YCL011C	1.00517	5.13893e-35	2.18669e-34		YCL011C	0.880385	1.83389e-26	7.12743e-26		YCL011C	-0.0388969	0.649485	0.898984		YCL011C	-0.163681	0.0367715	0.188669
YDR127W	0.0345084	0.686844	0.999031		YDR127W	-0.239346	7.31433e-05	0.000110864		YDR127W	-0.273855	6.43835e-06	1.09552e-05		YDR127W	-0.0881434	0.156576	0.549402		YDR127W	-0.122652	0.0369423	0.189089
YPL117C	0.0892998	0.461267	0.999031		YPL117C	2.04955	2.36124e-127	4.24363e-126		YPL117C	1.96025	6.59089e-115	1.27991e-113		YPL117C	-0.0879478	0.308685	0.72183		YPL117C	-0.177248	0.0370697	0.189556
YCL024W	0.0803066	0.608605	0.999031		YCL024W	-1.00891	2.33575e-21	6.97831e-21		YCL024W	-1.08922	3.44403e-21	1.14412e-20		YCL024W	0.265907	0.0392365	0.297097		YCL024W	0.185601	0.037506	0.1916
YCR004C	0.178146	0.090231	0.838129		YCR004C	0.891544	7.47883e-34	3.08043e-33		YCR004C	0.713398	2.35003e-21	7.84291e-21		YCR004C	0.0324077	0.679137	0.90686		YCR004C	-0.145738	0.0377013	0.192409
YGL001C	0.0732986	0.550603	0.999031		YGL001C	0.867276	9.65005e-24	3.05664e-23		YGL001C	0.793977	9.80156e-20	3.09616e-19		YGL001C	-0.0992737	0.272288	0.691531		YGL001C	-0.172572	0.0378115	0.192783
YPL163C	-0.0365276	0.776323	0.999031		YPL163C	-0.365423	5.01329e-05	7.67511e-05		YPL163C	-0.328896	0.000334796	0.00050376		YPL163C	0.144287	0.127152	0.513687		YPL163C	0.180814	0.0378511	0.192797
YKL088W	-0.248243	0.0640967	0.771169		YKL088W	0.698504	6.45649e-14	1.50721e-13		YKL088W	0.946747	9.43366e-23	3.27098e-22		YKL088W	-0.0682234	0.504628	0.833174		YKL088W	0.180019	0.0379177	0.192948
YKL078W	0.0165094	0.926597	0.999031		YKL078W	-0.726421	8.54713e-09	1.59917e-08		YKL078W	-0.742931	5.27595e-09	1.0668e-08		YKL078W	-0.214498	0.126474	0.512386		YKL078W	-0.231008	0.0381198	0.193788
YML039W	-0.297083	0.0152621	0.386694		YML039W	-5.41002	0	0		YML039W	-5.11293	0	0		YML039W	-0.126238	0.163235	0.5569		YML039W	0.170845	0.0382451	0.194236
YML092C	0.241184	0.0313057	0.545087		YML092C	1.40306	2.19743e-71	1.91226e-70		YML092C	1.16187	6.10423e-48	4.24072e-47		YML092C	0.0819398	0.314254	0.726592		YML092C	-0.159244	0.0384348	0.19501
YGL197W	0.0603726	0.675927	0.999031		YGL197W	-1.98732	7.68975e-91	9.21337e-90		YGL197W	-2.0477	1.76678e-83	2.34504e-82		YGL197W	0.227788	0.0569259	0.362704		YGL197W	0.167416	0.0384804	0.195052
YER150W	-0.018023	0.970229	#N/A		YER150W	-1.91987	7.50167e-10	1.4761e-09		YER150W	-1.90185	2.4865e-07	4.58698e-07		YER150W	0.417272	0.336998	#N/A		YER150W	0.435295	0.0386764	0.195701
YER159C-A	-0.142193	0.270942	0.999031		YER159C-A	-3.1128	1.87806e-254	7.93309e-253		YER159C-A	-2.97061	3.38185e-232	1.61742e-230		YER159C-A	-0.306838	0.00255011	0.0641165		YER159C-A	-0.164645	0.0386832	0.195701
YHR103W	-0.0414208	0.736725	0.999031		YHR103W	-0.940183	2.66557e-28	9.57521e-28		YHR103W	-0.898762	5.47148e-24	1.96667e-23		YHR103W	0.115038	0.236589	0.649824		YHR103W	0.156458	0.0387797	0.195845
YIL111W	-0.170118	0.539578	#N/A		YIL111W	2.01343	8.58332e-27	2.96194e-26		YIL111W	2.18355	9.5489e-27	3.74387e-26		YIL111W	0.226882	0.256586	#N/A		YIL111W	0.397	0.0387868	0.195845
YGR088W	0.322581	0.411154	#N/A		YGR088W	-1.41775	7.78529e-09	1.45946e-08		YGR088W	-1.74033	1.31534e-08	2.59524e-08		YGR088W	0.686303	0.0504189	#N/A		YGR088W	0.363722	0.0388294	0.195871
YML065W	-0.166762	0.344189	0.999031		YML065W	0.186154	0.125485	0.144716		YML065W	0.352916	0.00573243	0.00773818		YML065W	0.0590734	0.66923	0.904252		YML065W	0.225835	0.0389135	0.196106
YOR210W	0.0354202	0.797772	0.999031		YOR210W	0.70531	3.85754e-13	8.74064e-13		YOR210W	0.66989	9.65579e-12	2.22356e-11		YOR210W	-0.153088	0.139937	0.526883		YOR210W	-0.188508	0.0391397	0.197056
YOL101C	-0.138199	0.59498	#N/A		YOL101C	0.275875	0.13735	0.157739		YOL101C	0.414074	0.0228411	0.0290701		YOL101C	-0.454014	0.0306445	#N/A		YOL101C	-0.315815	0.0392237	0.197099
YPR115W	-0.0419585	0.798908	0.999031		YPR115W	-1.93508	1.28541e-66	1.02886e-65		YPR115W	-1.89313	1.38603e-55	1.13772e-54		YPR115W	0.139455	0.316535	0.727923		YPR115W	0.181413	0.0392004	0.197099
YDR206W	-0.159277	0.239116	0.982177		YDR206W	-1.313	8.19905e-43	4.22887e-42		YDR206W	-1.15372	1.58802e-33	7.62646e-33		YDR206W	-0.319819	0.00383094	0.0827484		YDR206W	-0.160543	0.0394151	0.1975
YBR172C	-0.244374	0.0414807	0.63836		YBR172C	-0.610025	3.75972e-13	8.52567e-13		YBR172C	-0.365651	1.9111e-05	3.14907e-05		YBR172C	-0.0846002	0.354582	0.756255		YBR172C	0.159774	0.0394168	0.1975
YFL033C	-0.27104	0.0920113	0.841047		YFL033C	-1.93482	7.23496e-67	5.84759e-66		YFL033C	-1.66378	4.57788e-47	3.0985e-46		YFL033C	-0.0813483	0.53744	0.845596		YFL033C	0.189692	0.0393738	0.1975
YLR166C	-0.144573	0.348174	0.999031		YLR166C	-0.433378	4.74586e-05	7.27916e-05		YLR166C	-0.288804	0.00949473	0.0125476		YLR166C	0.0488451	0.689316	0.911683		YLR166C	0.193418	0.0394578	0.197516
YDR261C-D	-0.367552	0.00381835	0.169535		YDR261C-D	-6.93459	0	0		YDR261C-D	-6.56704	0	0		YDR261C-D	-0.194797	0.0410794	0.305971		YDR261C-D	0.172755	0.0396401	0.198238
YDR380W	0.0985949	0.754094	0.999031		YDR380W	0.386523	0.0810367	0.0954916		YDR380W	0.287928	0.197817	0.225747		YDR380W	0.551372	0.0141685	0.18387		YDR380W	0.452777	0.0398768	0.199085
YKL171W	-0.0808187	0.75579	0.999031		YKL171W	-1.96456	1.43777e-29	5.32675e-29		YKL171W	-1.88374	1.68296e-22	5.80412e-22		YKL171W	0.158777	0.494158	#N/A		YKL171W	0.239596	0.0398855	0.199085
YDR300C	-0.144039	0.236688	0.982177		YDR300C	0.0585117	0.496043	0.526619		YDR300C	0.202551	0.0187734	0.0241372		YDR300C	-0.303783	0.00116998	0.037808		YDR300C	-0.159745	0.0401477	0.199162
YOR299W	0.109952	0.487416	0.999031		YOR299W	-0.939232	1.39245e-17	3.71514e-17		YOR299W	-1.04918	3.10443e-20	9.9586e-20		YOR299W	-0.0717875	0.584483	0.865677		YOR299W	-0.18174	0.040076	0.199162
YLR121C	0.0762625	0.66618	0.999031		YLR121C	-0.560121	4.07472e-06	6.69708e-06		YLR121C	-0.636383	7.11126e-07	1.27251e-06		YLR121C	0.304942	0.0263776	0.252929		YLR121C	0.228679	0.0399652	0.199162
YJR010W	0.000293438	0.998354	0.999505		YJR010W	0.402647	5.96654e-05	9.09598e-05		YJR010W	0.402353	6.6131e-05	0.000104993		YJR010W	-0.197578	0.0589197	0.367487		YJR010W	-0.197872	0.0400703	0.199162
YKR038C	0.245641	0.0655967	0.772816		YKR038C	0.498903	7.33615e-08	1.31887e-07		YKR038C	0.253262	0.008312	0.011035		YKR038C	0.0709411	0.489803	0.825885		YKR038C	-0.1747	0.0401679	0.199162
YEL046C	-0.00546931	0.955577	0.999031		YEL046C	0.727191	9.4382e-26	3.16815e-25		YEL046C	0.73266	5.93413e-26	2.26972e-25		YEL046C	-0.145823	0.0384631	0.294501		YEL046C	-0.140353	0.0401418	0.199162
YEL007W	0.0446352	0.691859	0.999031		YEL007W	-1.1626	3.15131e-50	1.91561e-49		YEL007W	-1.20723	5.76163e-50	4.20992e-49		YEL007W	0.190467	0.029311	0.261505		YEL007W	0.145832	0.0400499	0.199162
YBR034C	0.0213449	0.847824	0.999031		YBR034C	0.516406	4.22435e-11	8.80314e-11		YBR034C	0.495061	3.71607e-10	7.94419e-10		YBR034C	-0.132712	0.105752	0.483303		YBR034C	-0.154057	0.0402583	0.199421
YHR165C	-0.0268503	0.857088	0.999031		YHR165C	-2.37814	9.87636e-117	1.5745e-115		YHR165C	-2.35129	1.79026e-106	3.22749e-105		YHR165C	0.165705	0.152461	0.547642		YHR165C	0.192555	0.0403355	0.199583
YAL038W	-0.0109	0.899699	0.999031		YAL038W	-0.170288	0.00535337	0.00708113		YAL038W	-0.159388	0.00915209	0.0121169		YAL038W	-0.136146	0.0261118	0.252743		YAL038W	-0.125246	0.0403672	0.199583
YDR448W	-0.164754	0.355654	0.999031		YDR448W	0.0579804	0.636071	0.663472		YDR448W	0.222734	0.0857332	0.102402		YDR448W	0.0553752	0.697375	0.913122		YDR448W	0.220129	0.0404169	0.199639
YNL312W	0.248567	0.0419162	0.639547		YNL312W	1.03349	6.18671e-34	2.55709e-33		YNL312W	0.784921	3.46223e-19	1.07316e-18		YNL312W	0.0832353	0.363743	0.75973		YNL312W	-0.165331	0.0407675	0.201181
YPL257W-B	-0.234676	0.0520494	0.70243		YPL257W-B	-5.21741	0	0		YPL257W-B	-4.98274	0	0		YPL257W-B	-0.0692979	0.439806	0.806262		YPL257W-B	0.165378	0.0409383	0.201833
YDR111C	0.350078	0.0805159	0.835258		YDR111C	0.136112	0.323471	0.352528		YDR111C	-0.213966	0.140929	0.164228		YDR111C	0.107421	0.505378	0.833174		YDR111C	-0.242657	0.0410846	0.202157
YMR037C	-0.0749083	0.520601	0.999031		YMR037C	-0.606252	6.39278e-14	1.49294e-13		YMR037C	-0.531344	2.56725e-10	5.54754e-10		YMR037C	0.0731229	0.423376	0.796516		YMR037C	0.148031	0.0411199	0.202157
YKL190W	0.237238	0.160149	0.951618		YKL190W	2.58236	1.7457e-106	2.50059e-105		YKL190W	2.34512	1.20852e-83	1.62267e-82		YKL190W	-0.00709686	0.952537	0.986222		YKL190W	-0.244335	0.0411168	0.202157
YKL181W	-0.0885	0.425796	0.999031		YKL181W	0.140218	0.0739019	0.0877525		YKL181W	0.228718	0.00365734	0.0050381		YKL181W	-0.24324	0.00276025	0.0674928		YKL181W	-0.154741	0.0411934	0.202327
YOR193W	0.184682	0.594819	#N/A		YOR193W	-1.08153	1.32266e-06	2.23873e-06		YOR193W	-1.26621	1.8729e-06	3.27744e-06		YOR193W	0.528856	0.0814556	#N/A		YOR193W	0.344173	0.0412531	0.202372
YNR004W	0.418556	0.315136	#N/A		YNR004W	2.16979	1.83574e-13	4.20065e-13		YNR004W	1.75123	2.7315e-09	5.61335e-09		YNR004W	-0.157785	0.606538	#N/A		YNR004W	-0.576341	0.0412799	0.202372
YDR144C	0.0515339	0.645742	0.999031		YDR144C	-1.05432	5.25658e-41	2.59112e-40		YDR144C	-1.10586	1.51563e-43	9.53365e-43		YDR144C	-0.0935109	0.280443	0.701864		YDR144C	-0.145045	0.0414778	0.202719
YDR174W	0.104985	0.372034	0.999031		YDR174W	1.45943	1.13971e-69	9.64259e-69		YDR174W	1.35445	4.96485e-59	4.34012e-58		YDR174W	-0.0605653	0.476463	0.818542		YDR174W	-0.16555	0.0415058	0.202719
YOL076W	-0.14674	0.249979	0.986566		YOL076W	-0.084845	0.339012	0.368218		YOL076W	0.0618953	0.49936	0.532485		YOL076W	0.0195287	0.842173	0.961997		YOL076W	0.166269	0.0414762	0.202719
YPL113C	-0.119175	0.764119	#N/A		YPL113C	0.0781688	0.767514	0.788637		YPL113C	0.197344	0.505436	0.538171		YPL113C	0.352152	0.275531	#N/A		YPL113C	0.471326	0.0414425	0.202719
YGL137W	0.0454825	0.627663	0.999031		YGL137W	-0.204126	0.00199745	0.00274111		YGL137W	-0.249609	0.000177105	0.000271642		YGL137W	-0.0844091	0.219751	0.636907		YGL137W	-0.129892	0.0415593	0.202791
YMR316W	0.348799	0.162879	#N/A		YMR316W	1.35612	5.06933e-15	1.23261e-14		YMR316W	1.00732	2.2388e-08	4.35055e-08		YMR316W	0.025196	0.896105	#N/A		YMR316W	-0.323603	0.0416901	0.203239
YDR337W	0.0403351	0.806005	0.999031		YDR337W	1.60495	5.8434e-46	3.22055e-45		YDR337W	1.56461	3.14609e-39	1.76933e-38		YDR337W	0.266838	0.0272138	0.2559		YDR337W	0.226502	0.0417518	0.20335
YGR123C	0.0368823	0.76015	0.999031		YGR123C	0.546052	1.34235e-10	2.73528e-10		YGR123C	0.50917	2.98614e-09	6.11926e-09		YGR123C	-0.128959	0.148061	0.539647		YGR123C	-0.165841	0.0419325	0.20392
YML110C	0.200814	0.152462	0.942857		YML110C	1.72244	1.80742e-69	1.52472e-68		YML110C	1.52163	1.33066e-51	1.0119e-50		YML110C	0.00829828	0.936173	0.983083		YML110C	-0.192516	0.0419468	0.20392
YNL232W	0.122893	0.400549	0.999031		YNL232W	1.5976	4.59268e-55	3.03746e-54		YNL232W	1.4747	3.27799e-45	2.13623e-44		YNL232W	-0.0770242	0.476518	0.818542		YNL232W	-0.199917	0.0420035	0.204006
YDR480W	-0.0532977	0.761891	0.999031		YDR480W	0.01401	0.907016	0.915559		YDR480W	0.0673077	0.600886	0.632012		YDR480W	0.159465	0.259292	0.677653		YDR480W	0.212763	0.0421016	0.204293
YDL056W	-0.25727	0.0874411	0.838129		YDL056W	-0.343855	0.000999871	0.00140273		YDL056W	-0.0865845	0.424242	0.458124		YDL056W	-0.0743581	0.537676	0.845596		YDL056W	0.182912	0.0421773	0.20447
YOR304W	-0.116372	0.427335	0.999031		YOR304W	-0.118044	0.244895	0.272017		YOR304W	-0.00167186	0.98739	0.988586		YOR304W	0.0706566	0.535584	0.845596		YOR304W	0.187029	0.0423261	0.205001
YMR194W	0.245243	0.0861638	0.838129		YMR194W	5.73354	0	0		YMR194W	5.48829	0	0		YMR194W	0.0295991	0.75684	0.940303		YMR194W	-0.215644	0.0423799	0.205072
YBL046W	-0.374907	0.0381353	0.615062		YBL046W	0.963218	1.4528e-14	3.48131e-14		YBL046W	1.33812	1.07675e-24	3.96384e-24		YBL046W	-0.138605	0.31563	0.727923		YBL046W	0.236302	0.0428627	0.207216
YDR207C	-0.0424075	0.772329	0.999031		YDR207C	-0.481895	1.82515e-06	3.05706e-06		YDR207C	-0.439487	3.51716e-05	5.69815e-05		YDR207C	0.139297	0.229329	0.644891		YDR207C	0.181705	0.0429115	0.20726
YPR132W	0.0737352	0.491037	0.999031		YPR132W	2.34119	2.97081e-210	9.49838e-209		YPR132W	2.26745	8.55023e-197	3.27683e-195		YPR132W	-0.0794169	0.294398	0.711981		YPR132W	-0.153152	0.042999	0.207491
YDR289C	-0.20474	0.292655	0.999031		YDR289C	2.56704	3.28157e-84	3.57636e-83		YDR289C	2.77178	8.52593e-84	1.15011e-82		YDR289C	0.0789739	0.55801	0.852234		YDR289C	0.283714	0.043131	0.207562
YPR010C-A	0.561446	0.00142381	0.0916189		YPR010C-A	2.38065	6.65406e-85	7.32073e-84		YPR010C-A	1.8192	1.41111e-46	9.4188e-46		YPR010C-A	0.314435	0.0131055	0.179139		YPR010C-A	-0.247011	0.0431328	0.207562
YNL088W	-0.13448	0.244234	0.986566		YNL088W	0.0822216	0.306082	0.335028		YNL088W	0.216702	0.00900294	0.0119277		YNL088W	0.0153859	0.862106	0.963777		YNL088W	0.149866	0.0431182	0.207562
YDL099W	-0.286806	0.0448354	0.65917		YDL099W	1.80326	6.06061e-74	5.49729e-73		YDL099W	2.09006	1.58607e-91	2.34746e-90		YDL099W	-0.0876373	0.39731	0.785812		YDL099W	0.199169	0.0433402	0.208368
YGR119C	0.218117	0.0875256	0.838129		YGR119C	1.7419	1.49637e-84	1.63387e-83		YGR119C	1.52378	9.1442e-63	8.57658e-62		YGR119C	0.0407707	0.659792	0.900048		YGR119C	-0.177346	0.0435252	0.209065
YLR069C	-0.178016	0.113901	0.890571		YLR069C	-0.172559	0.0281494	0.0348375		YLR069C	0.00545752	0.946033	0.951955		YLR069C	-0.0316595	0.713183	0.920036		YLR069C	0.146357	0.0436214	0.209272
YNL069C	0.0772549	0.457341	0.999031		YNL069C	1.59326	2.72783e-104	3.82226e-103		YNL069C	1.51601	1.94439e-94	3.00861e-93		YNL069C	-0.070771	0.33643	0.746623		YNL069C	-0.148026	0.0436542	0.209272
YFR014C	-0.0923363	0.634882	0.999031		YFR014C	0.299796	0.0241801	0.0301055		YFR014C	0.392132	0.00570437	0.00770749		YFR014C	0.148979	0.331099	0.742302		YFR014C	0.241315	0.0436885	0.209272
YDR511W	0.184136	0.319812	0.999031		YDR511W	-0.343006	0.00561453	0.00741471		YDR511W	-0.527142	0.000126861	0.000197244		YDR511W	0.397805	0.00875917	0.140971		YDR511W	0.213669	0.0437482	0.209366
YGR191W	0.0997042	0.369625	0.999031		YGR191W	0.75451	3.59124e-22	1.09497e-21		YGR191W	0.654806	1.40104e-16	3.9244e-16		YGR191W	-0.049946	0.545702	0.848235		YGR191W	-0.14965	0.0439251	0.210021
YNL107W	0.129108	0.565775	0.999031		YNL107W	1.18608	5.1568e-14	1.20868e-13		YNL107W	1.05697	4.37017e-11	9.78344e-11		YNL107W	-0.160232	0.353903	#N/A		YNL107W	-0.28934	0.0441528	0.210531
YKL185W	0.139437	0.240867	0.982177		YKL185W	-0.594774	6.5094e-13	1.46575e-12		YKL185W	-0.734211	8.05392e-18	2.3695e-17		YKL185W	0.297779	0.000836481	0.0303798		YKL185W	0.158342	0.0441272	0.210531
YKR058W	0.276673	0.574169	#N/A		YKR058W	-1.39771	4.91956e-06	8.04223e-06		YKR058W	-1.67439	1.42173e-05	2.36832e-05		YKR058W	0.717	0.104058	#N/A		YKR058W	0.440327	0.0441423	0.210531
YCR052W	0.0939013	0.448692	0.999031		YCR052W	-0.344507	7.47691e-05	0.000113299		YCR052W	-0.438408	6.86553e-07	1.22968e-06		YCR052W	-0.0691162	0.461118	0.81711		YCR052W	-0.163018	0.0442736	0.210915
YDR483W	0.033784	0.751322	0.999031		YDR483W	0.123188	0.100802	0.117301		YDR483W	0.0894045	0.237567	0.267679		YDR483W	-0.111368	0.15572	0.549402		YDR483W	-0.145152	0.044351	0.211091
YIR033W	-0.232532	0.079667	0.834002		YIR033W	-0.824929	5.04423e-19	1.39938e-18		YIR033W	-0.592397	4.58259e-10	9.76775e-10		YIR033W	-0.0674996	0.517184	0.838145		YIR033W	0.165032	0.0444433	0.211338
YFL018C	0.157427	0.11161	0.889162		YFL018C	0.859017	5.18252e-35	2.20362e-34		YFL018C	0.70159	1.99781e-23	7.0582e-23		YFL018C	0.020811	0.772116	0.948585		YFL018C	-0.136616	0.0445981	0.211881
YER059W	-0.00532923	0.975038	0.999031		YER059W	0.0325694	0.779631	0.800235		YER059W	0.0378986	0.7605	0.783098		YER059W	0.203369	0.131746	0.517896		YER059W	0.208698	0.0446409	0.211892
YDL005C	-0.135293	0.364764	0.999031		YDL005C	-0.249864	0.0152049	0.0192287		YDL005C	-0.11457	0.289271	0.320815		YDL005C	0.0449302	0.706385	0.917278		YDL005C	0.180223	0.0446817	0.211893
YNR017W	0.184183	0.1076	0.884702		YNR017W	1.3706	1.43416e-65	1.13381e-64		YNR017W	1.18642	9.48597e-48	6.55858e-47		YNR017W	0.0278754	0.739674	0.932241		YNR017W	-0.156308	0.0447339	0.211948
YJR118C	0.126738	0.459406	0.999031		YJR118C	2.32209	1.2678e-83	1.35866e-82		YJR118C	2.19535	6.17175e-72	6.89496e-71		YJR118C	-0.112928	0.356674	0.756255		YJR118C	-0.239666	0.0453156	0.21451
YLR390W-A	-0.0868353	0.3999	0.999031		YLR390W-A	0.0316003	0.664234	0.690899		YLR390W-A	0.118436	0.105111	0.124189		YLR390W-A	0.0576925	0.433486	0.802086		YLR390W-A	0.144528	0.0453568	0.214511
YDR081C	-0.197251	0.164127	0.951618		YDR081C	-0.75836	1.15299e-14	2.77207e-14		YDR081C	-0.561109	4.05749e-08	7.78539e-08		YDR081C	-0.0313308	0.785121	0.953341		YDR081C	0.16592	0.0456898	0.214726
YLR219W	0.106736	0.433613	0.999031		YLR219W	-0.385842	3.88635e-05	6.00382e-05		YLR219W	-0.492578	6.37718e-07	1.14611e-06		YLR219W	0.27834	0.00859861	0.139481		YLR219W	0.171604	0.0454733	0.214726
YLR362W	0.0601031	0.742788	0.999031		YLR362W	-0.0529846	0.669182	0.695627		YLR362W	-0.113088	0.401446	0.435948		YLR362W	0.277062	0.060375	0.37204		YLR362W	0.216958	0.0456104	0.214726
YPL196W	-0.169318	0.458243	0.999031		YPL196W	0.276739	0.0758779	0.0898518		YPL196W	0.446057	0.00747024	0.0099563		YPL196W	0.107214	0.554961	#N/A		YPL196W	0.276532	0.0455385	0.214726
YMR164C	0.0191804	0.904471	0.999031		YMR164C	0.544287	6.17666e-07	1.06128e-06		YMR164C	0.525107	6.82593e-06	1.16079e-05		YMR164C	0.21971	0.0774885	0.41734		YMR164C	0.20053	0.0454989	0.214726
YKR014C	-0.141838	0.267647	0.999031		YKR014C	0.829327	9.07807e-21	2.66404e-20		YKR014C	0.971164	5.99109e-26	2.28999e-25		YKR014C	0.0257093	0.790269	0.95587		YKR014C	0.167547	0.0456546	0.214726
YKR044W	0.168105	0.469646	0.999031		YKR044W	-1.79123	6.48344e-29	2.36867e-28		YKR044W	-1.95934	2.29557e-31	1.0314e-30		YKR044W	-0.0571453	0.778714	0.94973		YKR044W	-0.225251	0.0455875	0.214726
YPL191C	-0.166316	0.553355	#N/A		YPL191C	-0.365663	0.0539553	0.0648741		YPL191C	-0.199347	0.334859	0.36764		YPL191C	0.143352	0.539845	#N/A		YPL191C	0.309668	0.0458497	0.215284
YOR224C	0.0967299	0.37927	0.999031		YOR224C	-0.490796	2.18185e-10	4.39789e-10		YOR224C	-0.587526	6.06182e-14	1.53656e-13		YOR224C	-0.0495217	0.545989	0.848235		YOR224C	-0.146252	0.0460801	0.216171
YLR083C	0.0431939	0.689305	0.999031		YLR083C	-0.42328	2.48494e-08	4.55747e-08		YLR083C	-0.466474	1.28228e-09	2.67408e-09		YLR083C	-0.098595	0.22493	0.642334		YLR083C	-0.141789	0.0464756	0.217831
YOR054C	0.375215	0.0394158	0.62059		YOR054C	-0.135483	0.261092	0.288513		YOR054C	-0.510698	0.000184168	0.000282252		YOR054C	0.585468	7.97142e-05	0.00645021		YOR054C	0.210254	0.0465598	0.21803
YJL183W	-0.00342676	0.976283	0.999031		YJL183W	-0.641198	2.16577e-15	5.3356e-15		YJL183W	-0.637771	8.34538e-15	2.18627e-14		YJL183W	-0.145321	0.108369	0.485151		YJL183W	-0.141894	0.0468029	0.218972
YML027W	-0.0368584	0.77416	0.999031		YML027W	-0.511335	7.88929e-09	1.478e-08		YML027W	-0.474476	3.36423e-07	6.1474e-07		YML027W	0.119188	0.240965	0.656653		YML027W	0.156047	0.0469375	0.219214
YNL042W	-0.0105401	0.965813	0.999031		YNL042W	-1.4613	3.07869e-17	8.12419e-17		YNL042W	-1.45076	1.00926e-16	2.84074e-16		YNL042W	-0.250783	0.24155	#N/A		YNL042W	-0.240243	0.0469384	0.219214
YER178W	0.0991276	0.323925	0.999031		YER178W	0.787043	1.27028e-28	4.60308e-28		YER178W	0.687915	4.41085e-22	1.50151e-21		YER178W	-0.0401717	0.576554	0.861151		YER178W	-0.139299	0.0471181	0.219763
YCL061C	-0.209771	0.177209	0.968973		YCL061C	0.407006	0.000160371	0.000238393		YCL061C	0.616777	3.6261e-08	6.98078e-08		YCL061C	-0.0126891	0.91552	0.977953		YCL061C	0.197082	0.0471401	0.219763
YJL002C	-0.0552829	0.611948	0.999031		YJL002C	-0.818195	1.85919e-26	6.3626e-26		YJL002C	-0.762912	5.26806e-23	1.83542e-22		YJL002C	-0.199987	0.0134855	0.181457		YJL002C	-0.144704	0.0473425	0.22051
YER174C	0.172349	0.278731	0.999031		YER174C	0.686945	5.23664e-10	1.0396e-09		YER174C	0.514597	6.85592e-06	1.16486e-05		YER174C	-0.0242889	0.845131	0.962199		YER174C	-0.196638	0.0476188	0.221599
YMR236W	-0.0305997	0.834916	0.999031		YMR236W	0.216319	0.0336093	0.0412681		YMR236W	0.246919	0.0196057	0.0251377		YMR236W	0.158796	0.154041	0.549402		YMR236W	0.189395	0.0476867	0.221718
YGR161C	0.139353	0.298145	0.999031		YGR161C	0.96381	9.40269e-26	3.15806e-25		YGR161C	0.824457	2.71538e-17	7.82566e-17		YGR161C	0.312868	0.00200394	0.0542771		YGR161C	0.173515	0.047786	0.221982
YDR458C	-0.0868901	0.560852	0.999031		YDR458C	0.565822	3.87881e-08	7.0587e-08		YDR458C	0.652712	1.65787e-09	3.44121e-09		YDR458C	0.101352	0.378877	0.774744		YDR458C	0.188242	0.0479176	0.222396
YEL071W	0.076117	0.537489	0.999031		YEL071W	0.999024	2.00711e-30	7.59159e-30		YEL071W	0.922907	4.75744e-26	1.8269e-25		YEL071W	-0.0946095	0.283539	0.70378		YEL071W	-0.170727	0.0480082	0.222618
YLR024C	-0.215332	0.290692	0.999031		YLR024C	-1.35547	4.47723e-22	1.36009e-21		YLR024C	-1.14014	1.21413e-14	3.15925e-14		YLR024C	0.0049615	0.9768	0.993258		YLR024C	0.220294	0.0481134	0.222735
YLR305C	-0.0583324	0.607373	0.999031		YLR305C	-2.02004	2.07651e-145	4.38567e-144		YLR305C	-1.96171	6.07142e-127	1.36183e-125		YLR305C	0.076504	0.399146	0.787925		YLR305C	0.134836	0.0481185	0.222735
YJL151C	0.137436	0.269216	0.999031		YJL151C	0.753776	4.58606e-18	1.24016e-17		YJL151C	0.61634	4.11406e-12	9.69384e-12		YJL151C	-0.0245703	0.792778	0.955932		YJL151C	-0.162006	0.0482155	0.222986
YML009W-B	0.547845	0.00350014	0.167665		YML009W-B	3.43016	2.86756e-154	6.40716e-153		YML009W-B	2.88232	3.13199e-100	5.22329e-99		YML009W-B	0.271556	0.0297665	0.263848		YML009W-B	-0.276289	0.048357	0.223443
YJR024C	0.108137	0.447984	0.999031		YJR024C	0.331224	0.00087567	0.00123327		YJR024C	0.223087	0.0287259	0.0361935		YJR024C	-0.0693683	0.53034	0.844592		YJR024C	-0.177505	0.048425	0.223559
YGR221C	0.115098	0.740851	0.999031		YGR221C	-3.45162	1.6105e-53	1.03555e-52		YGR221C	-3.56672	6.34652e-41	3.72488e-40		YGR221C	0.358573	0.270459	0.690731		YGR221C	0.243476	0.0485842	0.223898
YKL150W	0.101772	0.403683	0.999031		YKL150W	0.214786	0.0109314	0.0140267		YKL150W	0.113015	0.198641	0.226421		YKL150W	0.259191	0.00488972	0.0978898		YKL150W	0.15742	0.0485741	0.223898
YDR069C	-0.0343774	0.856869	0.999031		YDR069C	-0.819317	2.45515e-10	4.93332e-10		YDR069C	-0.78494	2.02007e-08	3.93607e-08		YDR069C	0.174281	0.271319	0.690731		YDR069C	0.208658	0.0489378	0.224382
YGR124W	0.0589237	0.569315	0.999031		YGR124W	-0.062745	0.390703	0.421042		YGR124W	-0.121669	0.0970994	0.115052		YGR124W	-0.0831865	0.262916	0.680333		YGR124W	-0.14211	0.0487636	0.224382
YKR066C	0.168133	0.245053	0.986566		YKR066C	1.83941	1.36056e-73	1.22833e-72		YKR066C	1.67128	5.19756e-59	4.52986e-58		YKR066C	-0.028054	0.789028	0.954739		YKR066C	-0.196187	0.0489467	0.224382
YHL024W	0.241956	0.388611	#N/A		YHL024W	-0.536869	0.00375256	0.0050292		YHL024W	-0.778826	0.000220659	0.000336041		YHL024W	0.553432	0.0169775	#N/A		YHL024W	0.311475	0.0489176	0.224382
YHR147C	0.289173	0.0783254	0.831223		YHR147C	2.27657	1.73073e-88	2.02338e-87		YHR147C	1.98739	1.54475e-63	1.47273e-62		YHR147C	0.0650176	0.582987	0.865677		YHR147C	-0.224155	0.04892	0.224382
YCL028W	0.20375	0.0501002	0.699192		YCL028W	1.32071	5.86303e-73	5.23602e-72		YCL028W	1.11696	1.63701e-51	1.2416e-50		YCL028W	0.0619844	0.409126	0.788676		YCL028W	-0.141766	0.0488084	0.224382
YBR183W	-0.0166574	0.953813	#N/A		YBR183W	-0.502073	0.00943497	0.0121712		YBR183W	-0.485416	0.0225753	0.0287634		YBR183W	0.305326	0.196552	#N/A		YBR183W	0.321983	0.0492794	0.225709
YCL034W	0.208761	0.11433	0.890571		YCL034W	1.33007	2.90717e-47	1.65101e-46		YCL034W	1.12131	2.96281e-32	1.36294e-31		YCL034W	0.0359688	0.715583	0.920036		YCL034W	-0.172792	0.0494381	0.226238
YNL172W	-0.113816	0.515288	0.999031		YNL172W	-2.22623	1.02788e-77	1.0014e-76		YNL172W	-2.11241	3.07651e-61	2.8126e-60		YNL172W	0.0527423	0.730316	0.930159		YNL172W	0.166558	0.0495018	0.226331
YIL144W	-0.179379	0.318245	0.999031		YIL144W	1.25074	3.90638e-24	1.25381e-23		YIL144W	1.43012	6.90859e-28	2.80758e-27		YIL144W	0.0523666	0.699117	0.913459		YIL144W	0.231745	0.049709	0.22708
YHL028W	-0.295286	0.214503	0.982177		YHL028W	-2.38463	7.98803e-48	4.58144e-47		YHL028W	-2.08934	7.0117e-34	3.40409e-33		YHL028W	-0.0756487	0.718551	0.922406		YHL028W	0.219637	0.0497567	0.227099
YBL080C	-0.146095	0.547231	#N/A		YBL080C	-0.671223	4.5771e-05	7.03151e-05		YBL080C	-0.525128	0.00323028	0.00446468		YBL080C	0.109696	0.591999	#N/A		YBL080C	0.255791	0.0499076	0.227188
YNL256W	0.0113444	0.930123	0.999031		YNL256W	-1.04667	8.56951e-31	3.27555e-30		YNL256W	-1.05802	1.83118e-30	7.98573e-30		YNL256W	-0.143528	0.161216	0.556016		YNL256W	-0.154872	0.04995	0.227188
YER077C	-0.212975	0.206945	0.982177		YER077C	-0.515747	9.59043e-06	1.53569e-05		YER077C	-0.302772	0.0131302	0.017133		YER077C	-0.0213216	0.876854	0.964749		YER077C	0.191653	0.0498211	0.227188
YHR013C	0.243988	0.051956	0.70243		YHR013C	0.946286	2.9835e-27	1.04639e-26		YHR013C	0.702298	6.07651e-15	1.60277e-14		YHR013C	0.0810265	0.389164	0.781133		YHR013C	-0.162962	0.0498969	0.227188
YLR354C	0.071596	0.408501	0.999031		YLR354C	0.551072	1.96189e-19	5.50337e-19		YLR354C	0.479476	5.6242e-15	1.48686e-14		YLR354C	-0.046792	0.450991	0.809039		YLR354C	-0.118388	0.0500313	0.22736
YDR505C	0.0435841	0.720986	0.999031		YDR505C	-0.150305	0.0756269	0.0895912		YDR505C	-0.193889	0.0274889	0.0347105		YDR505C	0.19826	0.0331104	0.277884		YDR505C	0.154676	0.0501236	0.227397
YLR132C	-0.241207	0.412719	#N/A		YLR132C	-1.86861	1.22606e-20	3.58164e-20		YLR132C	-1.6274	4.36692e-14	1.11181e-13		YLR132C	0.0345592	0.893704	#N/A		YLR132C	0.275766	0.0501266	0.227397
YJR129C	0.0867497	0.697442	0.999031		YJR129C	-0.346621	0.0264347	0.0327645		YJR129C	-0.43337	0.00655046	0.00877895		YJR129C	-0.163038	0.373187	#N/A		YJR129C	-0.249788	0.0501992	0.227529
YMR146C	0.012953	0.891894	0.999031		YMR146C	0.437787	7.38661e-11	1.5272e-10		YMR146C	0.424834	3.21655e-10	6.90694e-10		YMR146C	-0.11592	0.0924544	0.451408		YMR146C	-0.128874	0.0503579	0.228051
YGR079W	0.187985	0.164604	0.951618		YGR079W	0.0546962	0.562038	0.591689		YGR079W	-0.133289	0.169154	0.194805		YGR079W	0.0190541	0.854775	0.962932		YGR079W	-0.168931	0.0504618	0.228126
YKL062W	-0.0542969	0.697283	0.999031		YKL062W	0.205966	0.0342719	0.0420282		YKL062W	0.260262	0.0093105	0.0123154		YKL062W	0.127072	0.223289	0.639598		YKL062W	0.181369	0.0504432	0.228126
YPL009C	-0.159669	0.211788	0.982177		YPL009C	0.311967	0.000481155	0.000691444		YPL009C	0.471636	2.51562e-07	4.63597e-07		YPL009C	0.00642577	0.946385	0.985155		YPL009C	0.166095	0.0506209	0.228647
YOR130C	0.363663	0.0639436	0.771169		YOR130C	0.797413	3.61895e-09	6.88232e-09		YOR130C	0.433749	0.00231589	0.00325687		YOR130C	0.126926	0.411067	0.788767		YOR130C	-0.236738	0.0508106	0.22882
YGL186C	0.187837	0.149393	0.941618		YGL186C	0.642031	1.76453e-12	3.89004e-12		YGL186C	0.454194	1.09813e-06	1.94935e-06		YGL186C	0.0202646	0.836313	0.961997		YGL186C	-0.167572	0.0507203	0.22882
YGR044C	0.0782555	0.549078	0.999031		YGR044C	0.0413468	0.644488	0.671526		YGR044C	-0.0369087	0.697725	0.723608		YGR044C	0.237424	0.0200074	0.220761		YGR044C	0.159168	0.0508221	0.22882
YLR364W	0.481151	0.0739977	#N/A		YLR364W	2.99855	1.90217e-57	1.30579e-56		YLR364W	2.5174	7.67831e-39	4.25616e-38		YLR364W	0.0997111	0.590716	#N/A		YLR364W	-0.38144	0.0508344	0.22882
YLR079W	0.0392897	0.773813	0.999031		YLR079W	-0.310621	0.000911887	0.00128303		YLR079W	-0.34991	0.000442	0.000657208		YLR079W	0.20099	0.0645353	0.382063		YLR079W	0.1617	0.0510174	0.229447
YNL325C	-0.0925084	0.649194	0.999031		YNL325C	-0.887226	1.38378e-10	2.81572e-10		YNL325C	-0.794718	9.91589e-08	1.86249e-07		YNL325C	0.121826	0.476394	0.818542		YNL325C	0.214335	0.0512692	0.230381
YGR174C	0.441583	0.110919	#N/A		YGR174C	2.11098	5.10595e-28	1.82059e-27		YGR174C	1.6694	5.52411e-17	1.57091e-16		YGR174C	0.0770201	0.706099	#N/A		YGR174C	-0.364563	0.0514084	0.23067
YER122C	-0.11454	0.27431	0.999031		YER122C	0.662062	1.85907e-19	5.22001e-19		YER122C	0.776602	2.89693e-25	1.08719e-24		YER122C	0.0239727	0.755399	0.940303		YER122C	0.138513	0.0514218	0.23067
YLL036C	0.233459	0.0899082	0.838129		YLL036C	-0.215559	0.0238926	0.0297539		YLL036C	-0.449018	6.02392e-06	1.02712e-05		YLL036C	0.0687688	0.526627	0.841947		YLL036C	-0.16469	0.0515249	0.230934
YKL012W	-0.211864	0.238522	0.982177		YKL012W	0.506666	4.52712e-05	6.96212e-05		YKL012W	0.718531	3.18849e-08	6.15264e-08		YKL012W	0.0101066	0.942013	0.984973		YKL012W	0.221971	0.0515943	0.231047
YOL022C	-0.0211545	0.867035	0.999031		YOL022C	0.379228	1.9578e-05	3.08713e-05		YOL022C	0.400382	8.37647e-06	1.41573e-05		YOL022C	-0.180889	0.0594352	0.368303		YOL022C	-0.159735	0.0519624	0.232297
YLR396C	-0.222703	0.199117	0.982177		YLR396C	-0.835532	3.19397e-12	6.96964e-12		YLR396C	-0.612828	1.0079e-06	1.79247e-06		YLR396C	-0.0301534	0.832254	0.961997		YLR396C	0.19255	0.0519309	0.232297
YOR168W	0.0382671	0.688341	0.999031		YOR168W	-0.0706991	0.293646	0.322331		YOR168W	-0.108966	0.106972	0.126233		YOR168W	-0.0901009	0.190076	0.605712		YOR168W	-0.128368	0.0522551	0.232809
YOR276W	0.104054	0.323897	0.999031		YOR276W	0.947108	3.25014e-37	1.46713e-36		YOR276W	0.843055	2.05369e-29	8.74517e-29		YOR276W	-0.0376579	0.620922	0.883523		YOR276W	-0.141712	0.0521957	0.232809
YKL182W	-0.00907306	0.918329	0.999031		YKL182W	-0.535048	1.17269e-17	3.14038e-17		YKL182W	-0.525975	4.37133e-17	1.24615e-16		YKL182W	-0.129818	0.0391478	0.297097		YKL182W	-0.120745	0.0522078	0.232809
YCR032W	0.0208567	0.921849	0.999031		YCR032W	-1.61581	7.33631e-30	2.74259e-29		YCR032W	-1.63666	3.57691e-25	1.33891e-24		YCR032W	0.224075	0.225903	0.642334		YCR032W	0.203218	0.0522216	0.232809
YGL251C	-0.557172	0.188472	#N/A		YGL251C	-2.93556	5.11355e-23	1.59183e-22		YGL251C	-2.37839	3.39315e-15	9.04475e-15		YGL251C	-0.246256	0.529997	#N/A		YGL251C	0.310915	0.0526093	0.233692
YGL226C-A	0.170607	0.209889	0.982177		YGL226C-A	0.231576	0.0146577	0.0185773		YGL226C-A	0.0609694	0.531865	0.564235		YGL226C-A	0.00245362	0.981322	0.994374		YGL226C-A	-0.168154	0.052632	0.233692
YPR119W	-0.00411026	0.974311	0.999031		YPR119W	-0.169832	0.0537209	0.0646192		YPR119W	-0.165722	0.0729588	0.0878511		YPR119W	0.150216	0.132113	0.518349		YPR119W	0.154326	0.0526208	0.233692
YAL042W	0.0952589	0.360004	0.999031		YAL042W	-0.305156	2.91548e-05	4.5379e-05		YAL042W	-0.400414	6.70222e-08	1.2725e-07		YAL042W	-0.037547	0.631655	0.886842		YAL042W	-0.132806	0.0526161	0.233692
YPL090C	0.105816	0.285957	0.999031		YPL090C	1.65525	2.71614e-123	4.70607e-122		YPL090C	1.54943	4.23586e-108	7.70846e-107		YPL090C	-0.0298362	0.670888	0.904252		YPL090C	-0.135653	0.0527399	0.233972
YOR038C	0.0900875	0.550383	0.999031		YOR038C	-0.762722	1.03155e-13	2.3888e-13		YOR038C	-0.852809	1.26858e-14	3.29796e-14		YOR038C	0.259983	0.0341105	0.280718		YOR038C	0.169896	0.0528516	0.234268
YOR113W	0.0138724	0.928812	0.999031		YOR113W	-0.548705	2.32664e-07	4.08751e-07		YOR113W	-0.562577	6.96031e-07	1.24588e-06		YOR113W	0.191224	0.127134	0.513687		YOR113W	0.177351	0.0529541	0.234524
YPL131W	0.0116431	0.898228	0.999031		YPL131W	0.185252	0.00399315	0.00533557		YPL131W	0.173609	0.00701079	0.00936336		YPL131W	-0.112579	0.0810719	0.426563		YPL131W	-0.124222	0.0530174	0.234606
YKL081W	-0.0153372	0.868113	0.999031		YKL081W	-0.0157109	0.809795	0.827673		YKL081W	-0.000373777	0.995436	0.995952		YKL081W	-0.140867	0.032046	0.272291		YKL081W	-0.12553	0.053114	0.234828
YFL037W	0.060391	0.519182	0.999031		YFL037W	-0.109871	0.095945	0.112123		YFL037W	-0.170262	0.0104538	0.0137648		YFL037W	-0.0634092	0.353872	0.756255		YFL037W	-0.1238	0.0531576	0.234828
YGL220W	0.254885	0.160562	0.951618		YGL220W	2.77778	1.38587e-106	1.99008e-105		YGL220W	2.52289	1.1733e-83	1.57904e-82		YGL220W	0.0031211	0.980331	0.994374		YGL220W	-0.251764	0.0532698	0.235125
YGR078C	0.112773	0.391602	0.999031		YGR078C	1.73153	9.74241e-79	9.70384e-78		YGR078C	1.61876	1.74499e-66	1.76234e-65		YGR078C	-0.0609684	0.525653	0.841947		YGR078C	-0.173742	0.0535331	0.236056
YKL148C	-0.00690609	0.952748	0.999031		YKL148C	0.658641	6.19239e-16	1.55603e-15		YKL148C	0.665547	1.40689e-15	3.81165e-15		YKL148C	0.145772	0.0885697	0.442573		YKL148C	0.152678	0.0535711	0.236056
YDL052C	-0.00963281	0.935916	0.999031		YDL052C	0.0837951	0.318854	0.348153		YDL052C	0.0934279	0.273735	0.305046		YDL052C	-0.156358	0.0911788	0.448347		YDL052C	-0.146725	0.0537216	0.236275
YPL235W	0.0606932	0.588433	0.999031		YPL235W	1.8078	1.43819e-116	2.28023e-115		YPL235W	1.74711	4.11886e-106	7.37952e-105		YPL235W	-0.0891201	0.270819	0.690731		YPL235W	-0.149813	0.0537149	0.236275
YBL018C	0.134507	0.544978	0.999031		YBL018C	0.343745	0.0269416	0.0333785		YBL018C	0.209238	0.187807	0.215173		YBL018C	-0.1264	0.473396	#N/A		YBL018C	-0.260907	0.0537563	0.236275
YDR115W	0.537761	0.00317868	0.156531		YDR115W	1.7244	6.11161e-43	3.16633e-42		YDR115W	1.18664	2.78995e-19	8.68969e-19		YDR115W	0.3038	0.0255148	0.25111		YDR115W	-0.233962	0.0539018	0.236715
YPL053C	0.138406	0.298133	0.999031		YPL053C	1.41928	8.28849e-53	5.27093e-52		YPL053C	1.28087	3.60554e-41	2.13564e-40		YPL053C	-0.0320654	0.74673	0.934893		YPL053C	-0.170471	0.0541576	0.237639
YBR187W	0.0464872	0.711039	0.999031		YBR187W	0.59811	1.07646e-11	2.29109e-11		YBR187W	0.551623	6.95474e-10	1.47048e-09		YBR187W	-0.111985	0.237034	0.649824		YBR187W	-0.158472	0.0542244	0.237732
YNL288W	0.148396	0.250304	0.986566		YNL288W	-0.256023	0.00444764	0.00591962		YNL288W	-0.404419	1.23833e-05	2.07057e-05		YNL288W	-0.0070772	0.943887	0.985101		YNL288W	-0.155473	0.0547674	0.239874
YJL164C	0.0985257	0.631243	0.999031		YJL164C	0.125999	0.364677	0.394465		YJL164C	0.0274736	0.855674	0.871639		YJL164C	0.33823	0.0379391	0.291931		YJL164C	0.239704	0.0548047	0.239874
YDL084W	0.0496577	0.580639	0.999031		YDL084W	0.50138	2.65617e-15	6.53261e-15		YDL084W	0.451722	1.32854e-12	3.19544e-12		YDL084W	-0.070354	0.276029	0.697561		YDL084W	-0.120012	0.0548825	0.240013
YLR303W	0.0813039	0.472326	0.999031		YLR303W	0.77919	1.83701e-22	5.64866e-22		YLR303W	0.697886	2.88665e-18	8.63755e-18		YLR303W	-0.0710603	0.377511	0.774744		YLR303W	-0.152364	0.0551713	0.240271
YPR089W	-0.232621	0.0702035	0.800084		YPR089W	-0.976172	1.28844e-27	4.54925e-27		YPR089W	-0.743551	6.54507e-16	1.79764e-15		YPR089W	-0.0825084	0.418025	0.79246		YPR089W	0.150112	0.0551353	0.240271
YBR179C	-0.127475	0.404869	0.999031		YBR179C	-0.771856	3.1002e-13	7.04669e-13		YBR179C	-0.644381	5.49554e-09	1.11082e-08		YBR179C	0.0499843	0.681853	0.907368		YBR179C	0.177459	0.055011	0.240271
YNL191W	0.27332	0.111178	0.889162		YNL191W	-0.321249	0.00658407	0.00863404		YNL191W	-0.594569	1.74084e-06	3.05299e-06		YNL191W	0.0811499	0.560177	0.853098		YNL191W	-0.19217	0.0551045	0.240271
YIL105C	0.162658	0.226678	0.982177		YIL105C	0.441955	1.57842e-06	2.65609e-06		YIL105C	0.279297	0.00442158	0.00604134		YIL105C	0.326892	0.00163679	0.0473054		YIL105C	0.164234	0.0550358	0.240271
YPL237W	0.175823	0.111451	0.889162		YPL237W	1.3701	1.99297e-69	1.67879e-68		YPL237W	1.19428	2.2737e-52	1.74047e-51		YPL237W	0.0284186	0.719968	0.923076		YPL237W	-0.147404	0.0553483	0.240681
YIL136W	0.34511	0.17143	0.958285		YIL136W	2.04716	5.37988e-34	2.23018e-33		YIL136W	1.70205	1.33423e-19	4.19631e-19		YIL136W	0.673661	0.000273946	#N/A		YIL136W	0.328551	0.0553574	0.240681
YPL047W	0.367867	0.308484	#N/A		YPL047W	1.46742	6.2565e-09	1.17783e-08		YPL047W	1.09955	2.06234e-05	3.39055e-05		YPL047W	-0.0732657	0.79225	#N/A		YPL047W	-0.441133	0.0555812	0.241452
YGL086W	-0.348976	0.043474	0.649914		YGL086W	0.464082	0.00011533	0.000172861		YGL086W	0.813059	5.57131e-11	1.24195e-10		YGL086W	-0.138401	0.298952	0.713728		YGL086W	0.210576	0.0557548	0.242006
YER145C	0.137315	0.339483	0.999031		YER145C	1.33378	1.07573e-39	5.14907e-39		YER145C	1.19647	1.0792e-31	4.89446e-31		YER145C	-0.0524161	0.61435	0.882187		YER145C	-0.189731	0.0558495	0.242215
YDR358W	-0.0996781	0.550155	0.999031		YDR358W	0.921758	9.00852e-16	2.24612e-15		YDR358W	1.02144	3.47136e-17	9.94494e-17		YDR358W	0.106247	0.404205	0.788676		YDR358W	0.205925	0.0559212	0.242325
YDL229W	-0.0197504	0.822162	0.999031		YDL229W	-0.0303628	0.625024	0.653245		YDL229W	-0.0106124	0.864405	0.879154		YDL229W	-0.138241	0.0263635	0.252929		YDL229W	-0.118491	0.0560638	0.242565
YOR368W	-0.757272	0.0109698	#N/A		YOR368W	-0.102693	0.624919	0.653245		YOR368W	0.654579	0.00191764	0.00271995		YOR368W	-0.421588	0.0793962	#N/A		YOR368W	0.335684	0.0560694	0.242565
YGR024C	0.173657	0.356691	0.999031		YGR024C	-0.525386	5.76666e-05	8.80055e-05		YGR024C	-0.699043	2.62886e-07	4.83728e-07		YGR024C	-0.031464	0.838919	0.961997		YGR024C	-0.205121	0.0562127	0.242783
YML115C	0.0454311	0.686427	0.999031		YML115C	-0.354848	6.64857e-06	1.07533e-05		YML115C	-0.400279	6.3357e-07	1.13901e-06		YML115C	-0.0898554	0.304116	0.718763		YML115C	-0.135287	0.056169	0.242783
YGL040C	0.0829147	0.420197	0.999031		YGL040C	1.13988	3.1272e-56	2.10922e-55		YGL040C	1.05697	4.0926e-47	2.7798e-46		YGL040C	-0.0500787	0.50808	0.834397		YGL040C	-0.132993	0.0562983	0.242952
YDR322W	-0.185686	0.150432	0.941618		YDR322W	-0.374225	3.05215e-05	4.74042e-05		YDR322W	-0.188539	0.0422651	0.0523183		YDR322W	-0.0340586	0.737908	0.932211		YDR322W	0.151627	0.0563685	0.243054
YDL193W	0.0569318	0.689514	0.999031		YDL193W	0.774135	7.85571e-15	1.89975e-14		YDL193W	0.717203	1.93022e-12	4.60817e-12		YDL193W	-0.116469	0.288397	0.707884		YDL193W	-0.173401	0.0565711	0.243727
YGR033C	-0.0846627	0.59817	0.999031		YGR033C	-0.384591	0.000520105	0.000743907		YGR033C	-0.299928	0.0099026	0.0130717		YGR033C	0.102914	0.417394	0.79246		YGR033C	0.187577	0.0568389	0.244477
YHR068W	-0.0986939	0.313876	0.999031		YHR068W	0.886149	1.29033e-37	5.88425e-37		YHR068W	0.984843	1.23232e-45	8.08554e-45		YHR068W	-0.226943	0.00143445	0.0436073		YHR068W	-0.128249	0.0568346	0.244477
YPR034W	0.107898	0.381496	0.999031		YPR034W	0.166583	0.0529969	0.0637616		YPR034W	0.0586858	0.506077	0.538754		YPR034W	-0.0411273	0.665705	0.903456		YPR034W	-0.149025	0.0571778	0.245733
YIL036W	-0.0728513	0.544102	0.999031		YIL036W	-0.446956	7.70143e-08	1.3841e-07		YIL036W	-0.374105	1.57226e-05	2.61005e-05		YIL036W	0.0684933	0.467735	0.818542		YIL036W	0.141345	0.0572432	0.245812
YLR196W	-0.0803603	0.467092	0.999031		YLR196W	0.459633	3.73648e-09	7.10116e-09		YLR196W	0.539993	5.36927e-12	1.25848e-11		YLR196W	-0.223513	0.00569535	0.105287		YLR196W	-0.143153	0.0574098	0.246325
YLR148W	-0.121735	0.396378	0.999031		YLR148W	0.287097	0.00372909	0.00500006		YLR148W	0.408832	8.37807e-05	0.000131857		YLR148W	0.0474411	0.673316	0.90495		YLR148W	0.169176	0.0576307	0.24707
YNL217W	0.112161	0.439204	0.999031		YNL217W	-0.0596024	0.555082	0.584983		YNL217W	-0.171764	0.0987579	0.116993		YNL217W	-0.0551151	0.632067	0.886842		YNL217W	-0.167277	0.0578142	0.247653
YOR185C	-0.0740635	0.664152	0.999031		YOR185C	1.10385	3.53906e-21	1.05244e-20		YOR185C	1.17792	2.54973e-21	8.49959e-21		YOR185C	0.13603	0.294265	0.711981		YOR185C	0.210093	0.0579277	0.247936
YMR135C	-0.161784	0.407291	0.999031		YMR135C	0.446858	0.000853388	0.00120247		YMR135C	0.608642	1.81506e-05	2.9968e-05		YMR135C	0.0671686	0.661437	0.900048		YMR135C	0.228952	0.0580412	0.248219
YKL029C	-0.0220408	0.872989	0.999031		YKL029C	-0.397875	4.38439e-05	6.75159e-05		YKL029C	-0.375834	0.00011799	0.000184046		YKL029C	-0.202073	0.0430796	0.312365		YKL029C	-0.180032	0.0581667	0.248552
YPR032W	-0.184043	0.174536	0.962658		YPR032W	-1.05966	1.9436e-29	7.18698e-29		YPR032W	-0.875619	2.91966e-19	9.08389e-19		YPR032W	-0.0334224	0.760735	0.943047		YPR032W	0.15062	0.0582738	0.248771
YHL025W	0.444079	0.00828957	0.272635		YHL025W	1.32819	2.87408e-30	1.08354e-29		YHL025W	0.884112	3.64886e-13	8.95123e-13		YHL025W	0.234865	0.0640376	0.380885		YHL025W	-0.209214	0.0583131	0.248771
YBR108W	0.0690266	0.654504	0.999031		YBR108W	-0.337826	0.00145385	0.00201761		YBR108W	-0.406853	0.000278683	0.000421741		YBR108W	0.251972	0.0359939	0.287391		YBR108W	0.182945	0.0585394	0.249533
YMR179W	-0.260356	0.12521	0.908154		YMR179W	-0.683898	6.50781e-09	1.22315e-08		YMR179W	-0.423542	0.000531151	0.000785729		YMR179W	-0.0728206	0.597152	0.874405		YMR179W	0.187535	0.0587927	0.250408
YJL092W	-0.211456	0.236846	0.982177		YJL092W	-2.27501	4.55397e-76	4.31323e-75		YJL092W	-2.06355	3.42747e-57	2.89982e-56		YJL092W	-0.0433906	0.779525	0.950154		YJL092W	0.168065	0.059114	0.251447
YIL010W	0.297885	0.0629629	0.771169		YIL010W	1.11921	5.88757e-24	1.88032e-23		YIL010W	0.82132	1.21898e-12	2.93927e-12		YIL010W	0.102945	0.40051	0.787963		YIL010W	-0.19494	0.0591329	0.251447
YGR038W	0.275729	0.0777941	0.831223		YGR038W	1.46448	2.626e-41	1.30555e-40		YGR038W	1.18875	3.42561e-26	1.31984e-25		YGR038W	0.0787744	0.498511	0.832001		YGR038W	-0.196955	0.0591936	0.251501
YOL010W	0.102592	0.476193	0.999031		YOL010W	0.936118	1.49325e-20	4.35338e-20		YOL010W	0.833526	5.50768e-16	1.51566e-15		YOL010W	-0.0752351	0.489303	0.825885		YOL010W	-0.177827	0.0593762	0.252072
YBR297W	0.274515	0.252132	0.986566		YBR297W	-0.00581887	0.971989	0.974346		YBR297W	-0.280334	0.105555	0.124637		YBR297W	0.0128683	0.947492	#N/A		YBR297W	-0.261647	0.0595253	0.252499
YGL078C	0.0717327	0.56999	0.999031		YGL078C	1.07742	1.01998e-33	4.18624e-33		YGL078C	1.00568	2.92116e-29	1.23392e-28		YGL078C	-0.093274	0.305151	0.718763		YGL078C	-0.165007	0.0595827	0.252538
YHR201C	0.184473	0.163746	0.951618		YHR201C	1.6953	2.33133e-75	2.19373e-74		YHR201C	1.51083	6.44424e-57	5.42836e-56		YHR201C	0.0160354	0.869578	0.964392		YHR201C	-0.168438	0.0598367	0.253409
YNL020C	-0.260152	0.151926	0.942857		YNL020C	-0.983959	4.88733e-15	1.18986e-14		YNL020C	-0.723807	3.33695e-08	6.43054e-08		YNL020C	-0.0714654	0.636841	0.888861		YNL020C	0.188686	0.0598852	0.253409
YKR096W	-0.13002	0.368878	0.999031		YKR096W	-0.27124	0.00659268	0.00864141		YKR096W	-0.14122	0.17753	0.204005		YKR096W	0.0331082	0.774943	0.948585		YKR096W	0.163128	0.0600819	0.254035
YAL046C	0.418259	0.0281915	0.508578		YAL046C	1.4252	1.78534e-27	6.28453e-27		YAL046C	1.00694	3.19739e-13	7.85702e-13		YAL046C	0.186117	0.19978	0.617444		YAL046C	-0.232143	0.0601465	0.254103
YOR096W	0.0893535	0.46333	0.999031		YOR096W	1.1214	9.40545e-39	4.42155e-38		YOR096W	1.03205	4.75877e-33	2.24442e-32		YOR096W	-0.0721112	0.403351	0.788676		YOR096W	-0.161465	0.0604888	0.255343
YFR008W	0.185939	0.468498	#N/A		YFR008W	1.892	7.74683e-29	2.81955e-28		YFR008W	1.70606	7.04727e-19	2.15781e-18		YFR008W	0.507762	0.00775764	#N/A		YFR008W	0.321823	0.0606087	0.255643
YJL071W	0.0922673	0.62436	0.999031		YJL071W	-0.857488	6.23767e-11	1.29289e-10		YJL071W	-0.949755	2.21059e-12	5.25583e-12		YJL071W	-0.102974	0.512068	0.835822		YJL071W	-0.195241	0.0606942	0.255797
YPL146C	0.140582	0.271208	0.999031		YPL146C	2.27774	4.94378e-143	1.03658e-141		YPL146C	2.13716	2.38454e-121	4.99975e-120		YPL146C	-0.027183	0.76563	0.945798		YPL146C	-0.167765	0.0608511	0.256045
YIL135C	-0.192867	0.126889	0.909295		YIL135C	-0.299732	0.000668697	0.000949865		YIL135C	-0.106865	0.237998	0.268113		YIL135C	-0.0428839	0.661005	0.900048		YIL135C	0.149983	0.0608298	0.256045
YLR328W	0.139285	0.30037	0.999031		YLR328W	-0.13076	0.163199	0.185875		YLR328W	-0.270045	0.00509251	0.00692117		YLR328W	-0.0184021	0.860706	0.963777		YLR328W	-0.157687	0.0611123	0.256937
YLR295C	0.0708469	0.604647	0.999031		YLR295C	1.29164	7.40054e-42	3.73057e-41		YLR295C	1.22079	1.79223e-35	9.08201e-35		YLR295C	0.246241	0.0135567	0.18182		YLR295C	0.175394	0.0611886	0.257051
YMR102C	-0.0587551	0.688613	0.999031		YMR102C	-0.883496	1.71313e-18	4.68963e-18		YMR102C	-0.824741	1.00693e-14	2.63192e-14		YMR102C	0.100027	0.402869	0.788676		YMR102C	0.158782	0.061267	0.257174
YOR056C	0.153485	0.241529	0.982177		YOR056C	1.49092	1.92234e-59	1.37002e-58		YOR056C	1.33744	2.73718e-46	1.82279e-45		YOR056C	-0.012777	0.894423	0.972861		YOR056C	-0.166262	0.0614866	0.257475
YLR130C	-0.082818	0.57595	0.999031		YLR130C	-1.70008	9.05974e-60	6.49674e-59		YLR130C	-1.61726	2.14936e-53	1.6946e-52		YLR130C	-0.240956	0.0474603	0.330803		YLR130C	-0.158138	0.061419	0.257475
YPL004C	0.035688	0.74158	0.999031		YPL004C	0.635005	6.39198e-17	1.66174e-16		YPL004C	0.599317	7.46729e-15	1.95889e-14		YPL004C	0.175326	0.0252195	0.2488		YPL004C	0.139638	0.0614646	0.257475
YOR020C	0.346175	0.000717241	0.0550843		YOR020C	2.08475	9.54025e-186	2.61656e-184		YOR020C	1.73857	2.08583e-125	4.60715e-124		YOR020C	0.21288	0.00363615	0.0802298		YOR020C	-0.133295	0.0623012	0.260469
YIL042C	-0.291513	0.24068	0.982177		YIL042C	-1.30201	2.89812e-14	6.84826e-14		YIL042C	-1.0105	1.98156e-08	3.86494e-08		YIL042C	-0.0477777	0.821095	#N/A		YIL042C	0.243736	0.0622866	0.260469
YLR401C	0.181978	0.16894	0.956742		YLR401C	0.49156	1.0972e-07	1.95428e-07		YLR401C	0.309582	0.00105274	0.00152572		YLR401C	0.0188393	0.849269	0.962932		YLR401C	-0.163139	0.0625621	0.261292
YLR448W	0.0694877	0.4309	0.999031		YLR448W	0.4033	9.72984e-11	1.99527e-10		YLR448W	0.333813	8.98652e-08	1.69287e-07		YLR448W	-0.0459055	0.464708	0.81815		YLR448W	-0.115393	0.0625982	0.261292
YNL015W	0.806863	0.0014831	0.0927461		YNL015W	6.26176	1.39508e-267	6.21023e-266		YNL015W	5.4549	5.41811e-202	2.1774e-200		YNL015W	0.385805	0.000816054	0.0303798		YNL015W	-0.421057	0.0627088	0.261545
YML119W	-0.0478558	0.762752	0.999031		YML119W	0.115625	0.287301	0.315846		YML119W	0.163481	0.156701	0.181475		YML119W	0.131572	0.295519	0.711981		YML119W	0.179428	0.0629835	0.262482
YOL115W	0.052385	0.705572	0.999031		YOL115W	-0.151628	0.117364	0.135674		YOL115W	-0.204013	0.0398113	0.0494607		YOL115W	-0.103966	0.345568	0.750376		YOL115W	-0.156351	0.063058	0.262582
YJR060W	0.17185	0.105584	0.882851		YJR060W	1.87525	9.73306e-141	1.99029e-139		YJR060W	1.7034	1.64317e-111	3.08735e-110		YJR060W	0.0357316	0.642033	0.893491		YJR060W	-0.136118	0.0631721	0.262848
YJR046W	0.029259	0.851959	0.999031		YJR046W	-0.987505	4.74396e-20	1.3672e-19		YJR046W	-1.01676	4.52873e-19	1.39626e-18		YJR046W	0.205049	0.100903	0.470365		YJR046W	0.17579	0.0632682	0.263039
YJL186W	0.21092	0.0400957	0.624648		YJL186W	0.101255	0.158603	0.180925		YJL186W	-0.109665	0.135567	0.158235		YJL186W	0.0848373	0.271244	0.690731		YJL186W	-0.126083	0.0633498	0.263168
YGR029W	0.368524	0.0286172	0.512341		YGR029W	0.547327	2.14786e-06	3.58617e-06		YGR029W	0.178803	0.144458	0.168104		YGR029W	0.177946	0.182158	0.589169		YGR029W	-0.190578	0.0636563	0.264232
YOL017W	-0.327567	0.103241	0.881297		YOL017W	0.433258	0.00184541	0.00253788		YOL017W	0.760825	1.58332e-07	2.95e-07		YOL017W	-0.0975027	0.537545	0.845596		YOL017W	0.230064	0.0638157	0.264473
YIL149C	-0.152597	0.300235	0.999031		YIL149C	0.000524912	0.995891	0.996235		YIL149C	0.153121	0.149921	0.174111		YIL149C	0.0160432	0.889858	0.972305		YIL149C	0.16864	0.0637987	0.264473
YHR155W	-0.255207	0.130493	0.915939		YHR155W	-2.2161	4.72855e-80	4.82612e-79		YHR155W	-1.96089	1.92886e-58	1.65859e-57		YHR155W	-0.100087	0.494486	0.829331		YHR155W	0.155121	0.0641358	0.265589
YLR113W	0.122462	0.288523	0.999031		YLR113W	-0.576009	9.71356e-13	2.17204e-12		YLR113W	-0.69847	2.37934e-17	6.87663e-17		YLR113W	-0.0149751	0.865334	0.964392		YLR113W	-0.137437	0.0642245	0.265746
YLR351C	0.115092	0.312787	0.999031		YLR351C	0.27118	0.000673214	0.000955812		YLR351C	0.156088	0.0554337	0.0677783		YLR351C	-0.0221128	0.798218	0.955932		YLR351C	-0.137205	0.0647712	0.26769
YML073C	0.0880457	0.349095	0.999031		YML073C	1.00819	5.07326e-52	3.18427e-51		YML073C	0.920141	1.76094e-43	1.10647e-42		YML073C	-0.0341751	0.608891	0.87989		YML073C	-0.122221	0.0647967	0.26769
YDR105C	0.200399	0.216163	0.982177		YDR105C	-0.12775	0.254444	0.282028		YDR105C	-0.32815	0.00503476	0.0068459		YDR105C	0.0236009	0.856624	0.963777		YDR105C	-0.176799	0.0651515	0.268943
YGL131C	-0.215557	0.335319	0.999031		YGL131C	-1.89421	4.8603e-35	2.07117e-34		YGL131C	-1.67865	6.65363e-25	2.47141e-24		YGL131C	-0.0183613	0.925542	0.97893		YGL131C	0.197196	0.0654047	0.269775
YJR139C	0.0562408	0.600491	0.999031		YJR139C	0.26045	0.000589769	0.000840846		YJR139C	0.204209	0.00727277	0.00970205		YJR139C	-0.0812894	0.291954	0.711981		YJR139C	-0.13753	0.0656797	0.270696
YMR024W	0.233868	0.0579397	0.747766		YMR024W	0.339416	7.61775e-05	0.000115373		YMR024W	0.105548	0.233586	0.263707		YMR024W	0.0877109	0.352522	0.756255		YMR024W	-0.146157	0.0658117	0.271026
YDL113C	-0.00357305	0.984871	0.9991		YDL113C	0.19979	0.120474	0.139075		YDL113C	0.203364	0.139589	0.162732		YDL113C	0.208948	0.160059	0.554332		YDL113C	0.212521	0.0662017	0.272363
YMR028W	-0.221648	0.258515	0.992666		YMR028W	2.10091	2.0805e-55	1.38548e-54		YMR028W	2.32255	4.25334e-59	3.7294e-58		YMR028W	0.02948	0.834004	0.961997		YMR028W	0.251128	0.0662405	0.272363
YLL019C	0.0435587	0.794406	0.999031		YLL019C	-1.95834	2.91283e-67	2.36086e-66		YLL019C	-2.0019	2.04271e-59	1.79653e-58		YLL019C	0.203409	0.153976	0.549402		YLL019C	0.159851	0.0663877	0.272753
YGR295C	0.0372848	0.770303	0.999031		YGR295C	0.206462	0.0212626	0.0265932		YGR295C	0.169177	0.0628656	0.0762691		YGR295C	-0.115665	0.231451	0.646811		YGR295C	-0.15295	0.0668187	0.274308
YHR072W	0.0904283	0.424459	0.999031		YHR072W	-1.17699	8.16503e-50	4.91175e-49		YHR072W	-1.26741	1.84571e-55	1.51291e-54		YHR072W	-0.0423133	0.626602	0.885528		YHR072W	-0.132742	0.067056	0.275066
YBL084C	-0.248056	0.184816	0.975092		YBL084C	-1.54703	5.89182e-33	2.37437e-32		YBL084C	-1.29897	6.96754e-22	2.35109e-21		YBL084C	-0.0675785	0.670706	0.904252		YBL084C	0.180477	0.0672942	0.275827
YDR425W	-0.0986922	0.588285	0.999031		YDR425W	-1.09416	1.56805e-18	4.29858e-18		YDR425W	-0.995472	7.60504e-14	1.9185e-13		YDR425W	0.0814254	0.595423	0.873031		YDR425W	0.180118	0.0677739	0.277576
YOR006C	0.0380361	0.829014	0.999031		YOR006C	2.19945	5.12409e-71	4.45241e-70		YOR006C	2.16142	2.41356e-66	2.43333e-65		YOR006C	-0.185315	0.143414	0.533472		YOR006C	-0.223352	0.0680018	0.278
YJR049C	0.0627479	0.67184	0.999031		YJR049C	0.668011	1.12707e-10	2.3039e-10		YJR049C	0.605264	1.0863e-08	2.15584e-08		YJR049C	-0.109744	0.335868	0.746623		YJR049C	-0.172492	0.068037	0.278
YIL096C	0.0803664	0.745382	0.999031		YIL096C	0.792236	5.53203e-06	9.01037e-06		YIL096C	0.71187	5.04934e-05	8.09208e-05		YIL096C	-0.216098	0.247105	0.664184		YIL096C	-0.296464	0.0680006	0.278
YDR064W	0.0212529	0.832023	0.999031		YDR064W	1.52671	4.47247e-103	6.17713e-102		YDR064W	1.50546	4.18054e-100	6.95194e-99		YDR064W	-0.107698	0.129209	0.514862		YDR064W	-0.128951	0.0682323	0.27858
YPL168W	-0.26212	0.35614	#N/A		YPL168W	0.10565	0.58644	0.615587		YPL168W	0.36777	0.0760588	0.0913748		YPL168W	0.0435595	0.84929	#N/A		YPL168W	0.305679	0.0684505	0.279252
YDR351W	-0.170086	0.217296	0.982177		YDR351W	0.00407896	0.966061	0.969076		YDR351W	0.174165	0.0787554	0.0944335		YDR351W	-0.0110807	0.917215	0.978689		YDR351W	0.159005	0.0689123	0.280917
YER025W	0.0556416	0.542756	0.999031		YER025W	0.410512	1.94045e-10	3.91814e-10		YER025W	0.35487	4.33883e-08	8.31417e-08		YER025W	-0.0596732	0.364277	0.75973		YER025W	-0.115315	0.0693256	0.282382
YHR134W	0.568453	0.116244	#N/A		YHR134W	0.440469	0.0745974	0.0884622		YHR134W	-0.127984	0.628429	0.658468		YHR134W	0.18815	0.523684	#N/A		YHR134W	-0.380303	0.0695603	0.283117
YER016W	-0.218602	0.190564	0.977774		YER016W	0.470336	4.8268e-05	7.39742e-05		YER016W	0.688938	1.05404e-08	2.09398e-08		YER016W	-0.026152	0.839348	0.961997		YER016W	0.19245	0.0696268	0.283167
YLR193C	0.158202	0.356313	0.999031		YLR193C	1.60849	2.35249e-41	1.1726e-40		YLR193C	1.45029	4.91839e-32	2.25002e-31		YLR193C	-0.0478706	0.709451	0.919352		YLR193C	-0.206073	0.0697094	0.283283
YOR011W	-0.34763	0.210945	0.982177		YOR011W	-3.15013	1.38697e-54	9.0489e-54		YOR011W	-2.8025	4.54083e-49	3.25623e-48		YOR011W	-0.53848	0.0362713	0.289043		YOR011W	-0.19085	0.0698845	0.283773
RDN25-1_rRNA	2.06133	0.000117345	0.0130253		RDN25-1_rRNA	8.99797	2.66259e-113	4.05485e-112		RDN25-1_rRNA	6.93664	1.31652e-83	1.75952e-82		RDN25-1_rRNA	1.18485	2.12638e-07	4.15555e-05		RDN25-1_rRNA	-0.876477	0.0701631	0.284242
RDN25-2_rRNA	2.06133	0.000117345	0.0130253		RDN25-2_rRNA	8.99797	2.66259e-113	4.05485e-112		RDN25-2_rRNA	6.93664	1.31652e-83	1.75952e-82		RDN25-2_rRNA	1.18485	2.12638e-07	4.15555e-05		RDN25-2_rRNA	-0.876477	0.0701631	0.284242
YPR009W	0.109896	0.651135	0.999031		YPR009W	-0.995794	4.01901e-09	7.62308e-09		YPR009W	-1.10569	2.30154e-10	4.98093e-10		YPR009W	-0.123698	0.548158	#N/A		YPR009W	-0.233594	0.0701224	0.284242
YGR281W	-0.0618794	0.604086	0.999031		YGR281W	-0.879255	3.35666e-26	1.13863e-25		YGR281W	-0.817375	1.47499e-21	4.93398e-21		YGR281W	0.0751954	0.414902	0.791245		YGR281W	0.137075	0.0702715	0.284461
YLL014W	0.312227	0.105418	0.882851		YLL014W	2.16524	1.8575e-58	1.31089e-57		YLL014W	1.85302	6.64669e-41	3.8971e-40		YLL014W	0.0717371	0.60727	0.878476		YLL014W	-0.24049	0.0707031	0.285272
YMR256C	0.638574	0.013504	0.35689		YMR256C	6.79894	2.01496e-301	1.11053e-299		YMR256C	6.16036	4.05776e-250	2.11552e-248		YMR256C	0.213837	0.046979	0.329576		YMR256C	-0.424737	0.0707412	0.285272
YJR085C	0.368282	0.0217221	0.449997		YJR085C	3.96888	1.78991e-278	8.63184e-277		YJR085C	3.6006	4.56537e-213	1.95702e-211		YJR085C	0.143171	0.157105	0.549668		YJR085C	-0.22511	0.0706509	0.285272
YER013W	-0.240967	0.122869	0.901718		YER013W	-0.464998	1.77506e-05	2.80281e-05		YER013W	-0.22403	0.0464091	0.0572399		YER013W	-0.0751894	0.551967	0.8511		YER013W	0.165778	0.070724	0.285272
YER156C	0.0118557	0.912507	0.999031		YER156C	1.43032	4.50587e-79	4.50354e-78		YER156C	1.41846	1.63192e-76	1.9472e-75		YER156C	-0.123077	0.114077	0.49512		YER156C	-0.134933	0.0707447	0.285272
YJR047C	0.493452	0.244935	0.986566		YJR047C	8.04033	2.47104e-157	5.76609e-156		YJR047C	7.54688	2.78489e-140	6.77149e-139		YJR047C	-0.0697408	0.808647	0.95805		YJR047C	-0.563192	0.0708095	0.285313
YOR091W	0.0550117	0.673707	0.999031		YOR091W	0.580636	2.85658e-10	5.72998e-10		YOR091W	0.525624	1.42299e-08	2.80286e-08		YOR091W	-0.106763	0.260969	0.677653		YOR091W	-0.161775	0.0713542	0.28697
YGR063C	0.471621	0.026656	0.495199		YGR063C	4.84224	2.31545e-233	8.99294e-232		YGR063C	4.37062	8.22992e-181	2.85189e-179		YGR063C	0.152922	0.19649	0.612297		YGR063C	-0.318699	0.0714404	0.28697
YGR185C	0.0128032	0.892501	0.999031		YGR185C	-0.0505624	0.449147	0.479914		YGR185C	-0.0633656	0.34553	0.378423		YGR185C	-0.10464	0.128221	0.514862		YGR185C	-0.117443	0.0714097	0.28697
YML017W	0.0288653	0.807204	0.999031		YML017W	0.395318	1.44208e-06	2.43446e-06		YML017W	0.366453	1.70581e-05	2.82608e-05		YML017W	0.168465	0.0595484	0.368303		YML017W	0.1396	0.0714182	0.28697
YNL281W	0.226596	0.0810437	0.835448		YNL281W	2.17466	5.51731e-126	9.82421e-125		YNL281W	1.94806	2.80698e-98	4.57577e-97		YNL281W	0.0630157	0.497097	0.831427		YNL281W	-0.16358	0.0718336	0.288327
YPL160W	-0.0386333	0.690965	0.999031		YPL160W	-0.236783	0.000563092	0.000803803		YPL160W	-0.19815	0.00396297	0.00543839		YPL160W	-0.16077	0.0207478	0.223488		YPL160W	-0.122137	0.0720592	0.288568
YMR297W	0.0839341	0.389739	0.999031		YMR297W	-0.6011	2.1408e-18	5.85483e-18		YMR297W	-0.685034	4.8888e-23	1.70739e-22		YMR297W	-0.0353325	0.6217	0.883523		YMR297W	-0.119267	0.0720466	0.288568
YJR116W	-0.208811	0.2806	0.999031		YJR116W	-1.20187	2.74272e-18	7.47274e-18		YJR116W	-0.993062	2.70178e-13	6.66463e-13		YJR116W	-0.39503	0.0156997	0.191094		YJR116W	-0.186219	0.0720152	0.288568
YOR361C	0.020778	0.810036	0.999031		YOR361C	0.578933	2.27506e-21	6.80051e-21		YOR361C	0.558155	8.00737e-20	2.53494e-19		YOR361C	-0.0874441	0.158747	0.551649		YOR361C	-0.108222	0.0721208	0.288594
YOR191W	-0.0588143	0.683638	0.999031		YOR191W	-0.960062	3.87489e-22	1.18021e-21		YOR191W	-0.901248	7.97825e-18	2.34843e-17		YOR191W	0.0916486	0.435679	0.804692		YOR191W	0.150463	0.072266	0.288732
YIL008W	0.0468628	0.780762	0.999031		YIL008W	0.98798	6.26512e-17	1.62949e-16		YIL008W	0.941117	4.25885e-15	1.13159e-14		YIL008W	-0.152514	0.228601	0.644797		YIL008W	-0.199377	0.0722562	0.288732
YPR137W	0.0314221	0.797389	0.999031		YPR137W	1.01181	4.9464e-32	1.95391e-31		YPR137W	0.980391	2.49012e-29	1.05725e-28		YPR137W	-0.11573	0.203108	0.622055		YPR137W	-0.147152	0.072476	0.289129
YJR064W	0.00127162	0.990181	0.99941		YJR064W	0.185721	0.0107868	0.0138564		YJR064W	0.184449	0.0118383	0.0155102		YJR064W	-0.125897	0.0943698	0.457254		YJR064W	-0.127169	0.0724584	0.289129
YKR054C	-0.27026	0.109081	0.884702		YKR054C	-2.16266	5.74566e-76	5.43303e-75		YKR054C	-1.8924	6.42552e-55	5.20791e-54		YKR054C	-0.111642	0.437115	0.80517		YKR054C	0.158618	0.0726277	0.289514
YDR096W	0.0641083	0.659186	0.999031		YDR096W	-0.662101	3.17801e-11	6.65622e-11		YDR096W	-0.726209	6.50825e-12	1.51684e-11		YDR096W	0.222629	0.0537149	0.353863		YDR096W	0.15852	0.0728707	0.290261
YLL034C	-0.0812265	0.535876	0.999031		YLL034C	0.0173775	0.851025	0.864621		YLL034C	0.0986041	0.289185	0.320781		YLL034C	-0.2368	0.0160779	0.191813		YLL034C	-0.155574	0.0731599	0.291122
YBL088C	-0.229691	0.341398	0.999031		YBL088C	-3.17201	8.34109e-82	8.74455e-81		YBL088C	-2.94232	6.01929e-63	5.66401e-62		YBL088C	-0.0609038	0.784089	0.95317		YBL088C	0.168787	0.0731982	0.291122
YER005W	-0.280838	0.116587	0.894614		YER005W	-1.41266	2.57989e-28	9.27318e-28		YER005W	-1.13182	1.42749e-19	4.47986e-19		YER005W	-0.451567	0.00286681	0.0688035		YER005W	-0.170729	0.0733538	0.291519
YLR141W	0.389884	0.15902	#N/A		YLR141W	0.731384	0.000125249	0.000187387		YLR141W	0.3415	0.0888262	0.105791		YLR141W	0.0907199	0.680872	#N/A		YLR141W	-0.299164	0.0736955	0.292432
YIL093C	-0.0237957	0.861967	0.999031		YIL093C	0.327152	0.000508686	0.000728215		YIL093C	0.350948	0.000412466	0.000614874		YIL093C	0.129051	0.227368	0.643535		YIL093C	0.152847	0.073658	0.292432
YDR099W	0.118044	0.213905	0.982177		YDR099W	1.21438	1.54706e-73	1.39452e-72		YDR099W	1.09634	1.51191e-59	1.33375e-58		YDR099W	-0.000316194	0.996292	0.997751		YDR099W	-0.11836	0.0740495	0.292725
YGR100W	-0.126307	0.44493	0.999031		YGR100W	-0.348699	0.00220123	0.00300863		YGR100W	-0.222392	0.0635464	0.0770465		YGR100W	0.0492556	0.711117	0.919478		YGR100W	0.175562	0.0739305	0.292725
YLR457C	-0.361054	0.248441	#N/A		YLR457C	-0.54507	0.0113084	0.0144751		YLR457C	-0.184016	0.417705	0.452078		YLR457C	-0.0527575	0.839776	#N/A		YLR457C	0.308296	0.073982	0.292725
YPR111W	-0.28189	0.184916	0.975092		YPR111W	-0.0262215	0.858499	0.871603		YPR111W	0.255668	0.0959014	0.113772		YPR111W	-0.0529647	0.754929	0.940282		YPR111W	0.228925	0.073996	0.292725
YKR070W	0.0708028	0.697238	0.999031		YKR070W	1.57622	4.31055e-35	1.84369e-34		YKR070W	1.50542	4.36437e-31	1.94132e-30		YKR070W	-0.147075	0.276469	0.697987		YKR070W	-0.217878	0.0738445	0.292725
YLR194C	0.199608	0.1054	0.882851		YLR194C	-0.433022	4.59637e-07	7.94005e-07		YLR194C	-0.63263	8.48737e-13	2.05336e-12		YLR194C	0.346617	0.000156371	0.010877		YLR194C	0.147008	0.0744453	0.292771
YLR387C	0.060403	0.610061	0.999031		YLR387C	2.09221	9.40239e-145	1.9786e-143		YLR387C	2.03181	5.08241e-124	1.10157e-122		YLR387C	0.207109	0.0150985	0.188915		YLR387C	0.146706	0.0744533	0.292771
YPL014W	0.0611124	0.796117	0.999031		YPL014W	-1.14279	5.54681e-13	1.25193e-12		YPL014W	-1.2039	7.05546e-12	1.64042e-11		YPL014W	0.284697	0.1558	0.549402		YPL014W	0.223585	0.0744532	0.292771
YBL054W	-0.027049	0.871186	0.999031		YBL054W	-0.764693	8.23029e-11	1.69678e-10		YBL054W	-0.737644	4.35334e-10	9.28595e-10		YBL054W	-0.225121	0.070802	0.397954		YBL054W	-0.198072	0.0741263	0.292771
YBL010C	-0.24908	0.238906	0.982177		YBL010C	0.50165	0.000587867	0.000838341		YBL010C	0.75073	9.35393e-07	1.66763e-06		YBL010C	-0.0123681	0.940154	0.984582		YBL010C	0.236712	0.0742925	0.292771
YCL045C	-0.0756864	0.427402	0.999031		YCL045C	-0.501037	8.99776e-14	2.08781e-13		YCL045C	-0.425351	3.23899e-10	6.95254e-10		YCL045C	-0.188823	0.0080264	0.133904		YCL045C	-0.113137	0.0743944	0.292771
YFR034C	0.142721	0.372435	0.999031		YFR034C	1.84381	1.23441e-60	9.01963e-60		YFR034C	1.70109	2.58811e-50	1.90552e-49		YFR034C	-0.0542645	0.639417	0.891058		YFR034C	-0.196986	0.0744017	0.292771
YFR036W	0.0900404	0.747187	#N/A		YFR036W	0.382982	0.0511041	0.0616381		YFR036W	0.292941	0.140359	0.163597		YFR036W	-0.211648	0.340917	#N/A		YFR036W	-0.301689	0.0746054	0.293149
YOL139C	0.147576	0.167507	0.956742		YOL139C	1.0151	2.73801e-41	1.36007e-40		YOL139C	0.867524	2.42004e-30	1.05299e-29		YOL139C	0.014405	0.850527	0.962932		YOL139C	-0.133171	0.0748442	0.29367
YLR398C	-0.0790064	0.478461	0.999031		YLR398C	-0.514728	3.55971e-11	7.43685e-11		YLR398C	-0.435722	4.919e-08	9.38861e-08		YLR398C	0.0491949	0.563279	0.855998		YLR398C	0.128201	0.07488	0.29367
YPR082C	0.196067	0.483675	#N/A		YPR082C	1.00732	2.58273e-07	4.52094e-07		YPR082C	0.811256	5.12678e-05	8.20484e-05		YPR082C	-0.113953	0.603217	#N/A		YPR082C	-0.31002	0.0749067	0.29367
YDR512C	-0.0481875	0.801757	0.999031		YDR512C	1.27567	3.75689e-21	1.11665e-20		YDR512C	1.32386	2.61416e-22	8.98345e-22		YDR512C	-0.271719	0.0611554	0.373912		YDR512C	-0.223532	0.0751243	0.294302
YMR302C	-0.0535479	0.6766	0.999031		YMR302C	-0.83758	3.09789e-21	9.22672e-21		YMR302C	-0.784032	3.32985e-17	9.55373e-17		YMR302C	0.0821536	0.42615	0.796993		YMR302C	0.135701	0.0753676	0.295035
YPL111W	0.0177072	0.88049	0.999031		YPL111W	0.998361	2.20966e-33	9.00514e-33		YPL111W	0.980654	9.38393e-32	4.2592e-31		YPL111W	-0.125693	0.142715	0.533472		YPL111W	-0.143401	0.0756788	0.295871
YMR004W	-0.132103	0.352331	0.999031		YMR004W	-0.158942	0.106675	0.123887		YMR004W	-0.0268393	0.793069	0.81399		YMR004W	0.0255895	0.817464	0.959519		YMR004W	0.157692	0.0756944	0.295871
YAL005C	0.021011	0.825552	0.999031		YAL005C	1.81854	1.93587e-160	4.59134e-159		YAL005C	1.79753	1.52079e-156	4.19087e-155		YAL005C	0.140558	0.0371511	0.291931		YAL005C	0.119547	0.0759757	0.296748
YPL178W	0.212703	0.109132	0.884702		YPL178W	1.12272	8.2707e-34	3.40416e-33		YPL178W	0.910021	1.08627e-21	3.64632e-21		YPL178W	0.0557246	0.573294	0.860586		YPL178W	-0.156978	0.076188	0.297355
YER075C	-0.132201	0.377608	0.999031		YER075C	-1.42731	2.12992e-43	1.11244e-42		YER075C	-1.29511	7.6831e-33	3.59726e-32		YER075C	0.0158486	0.898624	0.973168		YER075C	0.14805	0.0762733	0.297466
YER060W-A	0.160072	0.301161	0.999031		YER060W-A	0.938503	3.2255e-18	8.76338e-18		YER060W-A	0.778431	2.42714e-12	5.76596e-12		YER060W-A	-0.0169086	0.886279	0.969944		YER060W-A	-0.176981	0.076608	0.298549
YIL052C	0.047443	0.631115	0.999031		YIL052C	1.23988	1.33969e-70	1.15714e-69		YIL052C	1.19244	3.48876e-65	3.42775e-64		YIL052C	-0.0756187	0.281498	0.701864		YIL052C	-0.123062	0.0766863	0.298631
YLL041C	0.116128	0.475289	0.999031		YLL041C	0.543256	1.58909e-06	2.67328e-06		YLL041C	0.427128	0.00025626	0.000388926		YLL041C	0.310112	0.0098553	0.153655		YLL041C	0.193984	0.0768717	0.298966
YLR353W	0.0858371	0.713891	0.999031		YLR353W	-2.30354	7.29431e-50	4.39253e-49		YLR353W	-2.38937	2.73104e-42	1.6689e-41		YLR353W	0.274466	0.187897	0.600129		YLR353W	0.188629	0.0768868	0.298966
YML006C	-0.155444	0.380425	0.999031		YML006C	-1.72383	1.72627e-45	9.37141e-45		YML006C	-1.56838	3.91716e-34	1.91296e-33		YML006C	0.00782501	0.958745	0.989085		YML006C	0.163269	0.0769984	0.299177
YGR150C	-0.381131	0.0442328	0.654962		YGR150C	-1.12486	1.98598e-17	5.26229e-17		YGR150C	-0.743732	4.01984e-08	7.72082e-08		YGR150C	-0.197089	0.213025	0.628058		YGR150C	0.184042	0.0771011	0.299354
YOR293W	0.11897	0.341857	0.999031		YOR293W	0.661549	7.46673e-14	1.73953e-13		YOR293W	0.54258	8.97397e-10	1.88845e-09		YOR293W	-0.0367857	0.678895	0.90686		YOR293W	-0.155755	0.077234	0.299647
YPR144C	0.0100744	0.937723	0.999031		YPR144C	-0.672855	1.132e-13	2.61511e-13		YPR144C	-0.682929	9.64187e-14	2.41862e-13		YPR144C	-0.137049	0.163853	0.5569		YPR144C	-0.147124	0.077294	0.299658
YOR362C	0.186723	0.112323	0.889162		YOR362C	0.878434	1.87756e-26	6.42166e-26		YOR362C	0.691711	1.48512e-16	4.15388e-16		YOR362C	0.0451407	0.599762	0.875952		YOR362C	-0.141583	0.0774204	0.299925
YMR234W	0.0409771	0.86524	#N/A		YMR234W	1.54808	7.74721e-20	2.21507e-19		YMR234W	1.50711	1.63946e-18	4.95434e-18		YMR234W	-0.238748	0.190072	#N/A		YMR234W	-0.279725	0.0774888	0.299968
YGR280C	-0.00923562	0.955146	0.999031		YGR280C	2.11781	3.76938e-75	3.52398e-74		YGR280C	2.12705	3.67762e-74	4.265e-73		YGR280C	-0.211296	0.0726327	0.402375		YGR280C	-0.20206	0.0775752	0.300033
YMR077C	-0.251973	0.409347	#N/A		YMR077C	1.2931	4.60675e-10	9.1644e-10		YMR077C	1.54507	5.39759e-12	1.2641e-11		YMR077C	0.10024	0.66451	#N/A		YMR077C	0.352212	0.0776778	0.300033
YCR057C	-0.131345	0.237181	0.982177		YCR057C	-0.56567	5.4309e-13	1.22672e-12		YCR057C	-0.434325	3.45269e-08	6.65138e-08		YCR057C	-0.259465	0.00203611	0.0546157		YCR057C	-0.12812	0.0776512	0.300033
YGR149W	0.17577	0.367946	0.999031		YGR149W	-1.33083	1.08962e-24	3.55648e-24		YGR149W	-1.5066	5.30858e-25	1.97943e-24		YGR149W	0.353289	0.034622	0.281364		YGR149W	0.177518	0.078104	0.301307
YLL052C	0.0516905	0.908322	#N/A		YLL052C	-0.313291	0.327515	0.356533		YLL052C	-0.364981	0.246317	0.276623		YLL052C	-0.385582	0.302563	#N/A		YLL052C	-0.437273	0.0781231	0.301307
YBR235W	-0.162072	0.314467	0.999031		YBR235W	-0.611262	8.16052e-08	1.46343e-07		YBR235W	-0.44919	8.01807e-05	0.000126432		YBR235W	-0.324414	0.0140965	0.18387		YBR235W	-0.162341	0.078185	0.301323
YOR064C	-0.509034	0.132466	#N/A		YOR064C	-0.45124	0.0547075	0.0657239		YOR064C	0.0577945	0.812423	0.832417		YOR064C	-0.177617	0.527443	#N/A		YOR064C	0.331417	0.078487	0.302042
YBR057C	-0.104083	0.509501	0.999031		YBR057C	0.243934	0.0250514	0.0311304		YBR057C	0.348017	0.00231227	0.00325258		YBR057C	0.0693908	0.573305	0.860586		YBR057C	0.173474	0.0784552	0.302042
YKL127W	0.0674845	0.508041	0.999031		YKL127W	0.284331	7.19907e-05	0.000109203		YKL127W	0.216847	0.00280306	0.00390123		YKL127W	-0.0529266	0.483402	0.821817		YKL127W	-0.120411	0.0787705	0.302673
YER098W	-0.0704883	0.824319	#N/A		YER098W	-1.28255	1.51731e-09	2.94456e-09		YER098W	-1.21207	2.85905e-07	5.25581e-07		YER098W	0.201287	0.467969	#N/A		YER098W	0.271775	0.0787912	0.302673
YFR011C	-0.0760669	0.621814	0.999031		YFR011C	0.640883	1.62224e-09	3.14082e-09		YFR011C	0.71695	1.40655e-10	3.08121e-10		YFR011C	0.0968935	0.414419	0.790692		YFR011C	0.17296	0.0788247	0.302673
YLR192C	0.146854	0.16008	0.951618		YLR192C	1.22181	6.69454e-62	4.9796e-61		YLR192C	1.07496	1.65227e-47	1.13694e-46		YLR192C	0.0195732	0.794749	0.955932		YLR192C	-0.127281	0.0794666	0.304526
YPL086C	0.0242123	0.831367	0.999031		YPL086C	-0.0793318	0.319425	0.348645		YPL086C	-0.103544	0.20175	0.229557		YPL086C	-0.103379	0.236734	0.649824		YPL086C	-0.127592	0.079482	0.304526
YAL012W	-0.00632713	0.940819	0.999031		YAL012W	0.778397	3.0566e-38	1.41735e-37		YAL012W	0.784724	1.09378e-38	6.03402e-38		YAL012W	-0.111253	0.0668223	0.387138		YAL012W	-0.104926	0.0794363	0.304526
YDL074C	-0.100773	0.387973	0.999031		YDL074C	0.515225	2.18411e-10	4.40091e-10		YDL074C	0.615998	2.09315e-13	5.19206e-13		YDL074C	0.0327922	0.710798	0.919478		YDL074C	0.133565	0.07957	0.30464
YDR057W	-0.177647	0.334101	0.999031		YDR057W	0.460244	0.000275042	0.000402954		YDR057W	0.637891	1.76579e-06	3.09561e-06		YDR057W	0.0210911	0.884178	0.969195		YDR057W	0.198738	0.0797458	0.304866
YBL008W	0.0087215	0.958139	0.999031		YBL008W	-1.21197	1.53528e-25	5.12971e-25		YBL008W	-1.2207	1.03094e-24	3.79763e-24		YBL008W	-0.149267	0.284839	0.70378		YBL008W	-0.157989	0.0797368	0.304866
YDR533C	0.00887215	0.959216	0.999031		YDR533C	0.85692	2.01712e-12	4.42498e-12		YDR533C	0.848048	6.60953e-12	1.53859e-11		YDR533C	-0.188091	0.154324	0.549402		YDR533C	-0.196964	0.080078	0.305491
YPR075C	-0.0368228	0.806701	0.999031		YPR075C	-0.64007	6.83027e-10	1.34628e-09		YPR075C	-0.603247	3.14296e-08	6.07087e-08		YPR075C	0.123038	0.303611	0.718763		YPR075C	0.15986	0.0800847	0.305491
YML036W	0.0697727	0.698505	0.999031		YML036W	0.127139	0.311861	0.340903		YML036W	0.057366	0.656566	0.684792		YML036W	-0.118806	0.41052	0.788676		YML036W	-0.188579	0.0800638	0.305491
YIL121W	0.378422	0.0828479	0.838129		YIL121W	-0.371481	0.0124511	0.015864		YIL121W	-0.749903	2.6639e-06	4.61972e-06		YIL121W	0.166347	0.359037	#N/A		YIL121W	-0.212075	0.080391	0.306436
YPL255W	0.0782486	0.769804	#N/A		YPL255W	-0.0267485	0.880703	0.89258		YPL255W	-0.104997	0.598377	0.629716		YPL255W	0.342677	0.120117	#N/A		YPL255W	0.264428	0.0805205	0.306538
YJL122W	-0.0125088	0.934224	0.999031		YJL122W	1.46958	4.1074e-43	2.12989e-42		YJL122W	1.48208	3.54348e-43	2.20733e-42		YJL122W	-0.194715	0.076716	0.415808		YJL122W	-0.182206	0.0805351	0.306538
YDR080W	-0.061399	0.739532	0.999031		YDR080W	-0.240206	0.0591597	0.0708374		YDR080W	-0.178807	0.181399	0.208244		YDR080W	0.138673	0.338475	0.74707		YDR080W	0.200072	0.0806321	0.306684
YBR176W	0.160642	0.424902	0.999031		YBR176W	0.92843	3.51458e-11	7.35051e-11		YBR176W	0.767788	1.07543e-07	2.01669e-07		YBR176W	-0.0606995	0.69786	0.913228		YBR176W	-0.221342	0.0809154	0.307538
YDR129C	0.120287	0.204231	0.982177		YDR129C	0.650979	1.72502e-22	5.30711e-22		YDR129C	0.530692	3.03841e-15	8.12912e-15		YDR129C	0.00621496	0.927701	0.979492		YDR129C	-0.114072	0.0814005	0.308732
YDR190C	0.0231629	0.819442	0.999031		YDR190C	0.910348	2.54398e-37	1.15105e-36		YDR190C	0.887185	1.03602e-34	5.1112e-34		YDR190C	-0.0967204	0.194747	0.610156		YDR190C	-0.119883	0.081407	0.308732
YNL054W-A	0.142205	0.169008	0.956742		YNL054W-A	-0.778599	1.1507e-26	3.95669e-26		YNL054W-A	-0.920804	3.99854e-36	2.06051e-35		YNL054W-A	0.0183598	0.80685	0.957696		YNL054W-A	-0.123845	0.0814007	0.308732
YDR502C	0.0457841	0.740909	0.999031		YDR502C	1.52431	9.63212e-55	6.31985e-54		YDR502C	1.47852	1.96318e-51	1.48703e-50		YDR502C	-0.123959	0.207454	0.624465		YDR502C	-0.169744	0.0816506	0.308983
YOR236W	-0.0613816	0.761965	0.999031		YOR236W	1.19886	5.11709e-17	1.33933e-16		YOR236W	1.26025	1.68183e-18	5.07708e-18		YOR236W	-0.296299	0.0500868	0.340325		YOR236W	-0.234917	0.0815759	0.308983
YKL214C	0.181979	0.201914	0.982177		YKL214C	1.41566	4.31958e-46	2.39439e-45		YKL214C	1.23368	1.78692e-33	8.56034e-33		YKL214C	0.0166504	0.875643	0.964749		YKL214C	-0.165329	0.0816477	0.308983
YEL047C	0.0472022	0.678036	0.999031		YEL047C	0.40324	4.55088e-07	7.86618e-07		YEL047C	0.356038	1.06568e-05	1.79068e-05		YEL047C	-0.0860837	0.305762	0.718763		YEL047C	-0.133286	0.0817296	0.309059
YOL081W	-0.0872863	0.518908	0.999031		YOL081W	-3.20553	1.09095e-257	4.71143e-256		YOL081W	-3.11824	6.89842e-223	3.16835e-221		YOL081W	0.044613	0.690534	0.912411		YOL081W	0.131899	0.0820979	0.310007
YIL126W	-0.0887927	0.425626	0.999031		YIL126W	-0.237816	0.00222809	0.0030439		YIL126W	-0.149023	0.0619474	0.0751865		YIL126W	0.0372769	0.659621	0.900048		YIL126W	0.12607	0.0820991	0.310007
YER107C	0.139657	0.281414	0.999031		YER107C	0.236228	0.00895411	0.0115884		YER107C	0.0965705	0.2989	0.330797		YER107C	-0.00358735	0.971398	0.993165		YER107C	-0.143245	0.0823723	0.310814
YLR371W	-0.0654181	0.656625	0.999031		YLR371W	-1.28408	7.64569e-37	3.41665e-36		YLR371W	-1.21866	3.49794e-30	1.51516e-29		YLR371W	0.0814048	0.499056	0.832001		YLR371W	0.146823	0.0824914	0.311039
YDR195W	-0.0126939	0.929684	0.999031		YDR195W	0.935513	2.05632e-20	5.97386e-20		YDR195W	0.948207	2.04694e-20	6.61399e-20		YDR195W	-0.177433	0.100765	0.470365		YDR195W	-0.164739	0.0825567	0.311061
YPR112C	-0.0177046	0.892789	0.999031		YPR112C	1.84884	7.46559e-89	8.79906e-88		YPR112C	1.86654	4.14805e-89	5.94177e-88		YPR112C	-0.176511	0.0609987	0.373762		YPR112C	-0.158807	0.0827746	0.311209
YMR218C	-0.134615	0.425922	0.999031		YMR218C	-0.999197	8.88602e-18	2.38845e-17		YMR218C	-0.864582	1.81401e-12	4.33788e-12		YMR218C	0.0303618	0.828077	0.961997		YMR218C	0.164977	0.0827088	0.311209
YER087W	-0.0355222	0.848047	0.999031		YER087W	0.0940111	0.456867	0.487622		YER087W	0.129533	0.339646	0.372472		YER087W	0.155731	0.296138	0.711981		YER087W	0.191253	0.0827175	0.311209
YKL065C	-0.0763582	0.569557	0.999031		YKL065C	0.330217	0.000393502	0.000571298		YKL065C	0.406576	2.60843e-05	4.26412e-05		YKL065C	0.0739996	0.47019	0.818542		YKL065C	0.150358	0.0830995	0.311981
YKL019W	-0.0378968	0.795451	0.999031		YKL019W	-0.627595	9.53963e-10	1.87012e-09		YKL019W	-0.589698	1.48726e-08	2.92449e-08		YKL019W	-0.1893	0.106312	0.483471		YKL019W	-0.151403	0.0830592	0.311981
YHR083W	0.235934	0.131863	0.916564		YHR083W	-0.67562	3.40426e-10	6.81206e-10		YHR083W	-0.911554	1.11645e-15	3.03615e-15		YHR083W	0.0828507	0.521317	0.838924		YHR083W	-0.153084	0.0835797	0.313559
YMR260C	0.202592	0.0656198	0.772816		YMR260C	1.26475	5.51688e-60	3.98579e-59		YMR260C	1.06216	5.077e-42	3.07007e-41		YMR260C	0.0704911	0.373513	0.7709		YMR260C	-0.132101	0.0837481	0.31374
YFR047C	0.0442601	0.770755	0.999031		YFR047C	-0.0235251	0.824659	0.841083		YFR047C	-0.0677851	0.532574	0.564884		YFR047C	-0.116663	0.331178	0.742302		YFR047C	-0.160923	0.083736	0.31374
YPR158C-D	-0.286514	0.0185888	0.427639		YPR158C-D	-5.29283	0	0		YPR158C-D	-5.00632	0	0		YPR158C-D	-0.144386	0.107774	0.485151		YPR158C-D	0.142127	0.0838378	0.313851
YGR087C	0.638321	0.0888331	0.838129		YGR087C	7.51418	2.79414e-166	6.93977e-165		YGR087C	6.87586	7.22039e-158	2.00886e-156		YGR087C	0.0274565	0.827088	0.961997		YGR087C	-0.610864	0.0839353	0.313865
YHR170W	-0.0155781	0.892704	0.999031		YHR170W	0.132674	0.10265	0.119356		YHR170W	0.148252	0.0707609	0.0853289		YHR170W	-0.148888	0.083238	0.431712		YHR170W	-0.13331	0.0839617	0.313865
YOR044W	0.287457	0.458528	#N/A		YOR044W	-0.985641	6.78469e-05	0.000103134		YOR044W	-1.2731	2.01255e-05	3.31246e-05		YOR044W	0.612848	0.0705631	#N/A		YOR044W	0.32539	0.0842511	0.314722
YKL080W	-0.0197842	0.858428	0.999031		YKL080W	-0.360742	4.04976e-06	6.65984e-06		YKL080W	-0.340958	1.43221e-05	2.38304e-05		YKL080W	-0.151325	0.0601307	0.371092		YKL080W	-0.131541	0.0847031	0.316185
YDL181W	0.275738	0.117513	0.896961		YDL181W	2.24838	2.01836e-78	2.00004e-77		YDL181W	1.97264	9.15446e-53	7.07301e-52		YDL181W	0.48628	0.000126038	0.00940475		YDL181W	0.210542	0.0850299	0.317102
YKR055W	0.379076	0.0979851	#N/A		YKR055W	1.14957	2.84576e-13	6.47599e-13		YKR055W	0.770494	3.65771e-06	6.30538e-06		YKR055W	0.13265	0.458392	#N/A		YKR055W	-0.246427	0.0850703	0.317102
YHR169W	0.0846633	0.593899	0.999031		YHR169W	0.757744	1.07734e-11	2.29212e-11		YHR169W	0.673081	2.6179e-09	5.38564e-09		YHR169W	-0.0978115	0.407881	0.788676		YHR169W	-0.182475	0.0853001	0.317732
YMR052W	-0.443901	0.180971	#N/A		YMR052W	0.654538	0.00410054	0.00547528		YMR052W	1.09844	5.19121e-06	8.89329e-06		YMR052W	-0.0896769	0.730342	#N/A		YMR052W	0.354224	0.0854254	0.317746
YJL133C-A	0.622545	0.0178836	0.418238		YJL133C-A	2.54386	2.03456e-44	1.0782e-43		YJL133C-A	1.92131	4.28027e-24	1.54234e-23		YJL133C-A	0.307238	0.103051	#N/A		YJL133C-A	-0.315307	0.0853949	0.317746
YLR074C	0.0744166	0.631992	0.999031		YLR074C	1.47347	1.96568e-41	9.81485e-41		YLR074C	1.39905	9.14624e-37	4.82931e-36		YLR074C	-0.109168	0.333264	0.743727		YLR074C	-0.183585	0.0857243	0.318631
YDL139C	-0.135435	0.653526	#N/A		YDL139C	0.209092	0.305317	0.334255		YDL139C	0.344527	0.121243	0.142435		YDL139C	0.16771	0.493096	#N/A		YDL139C	0.303144	0.0859423	0.318827
YOR052C	0.0298573	0.836355	0.999031		YOR052C	2.90286	1.1341e-187	3.1553e-186		YOR052C	2.873	7.34307e-165	2.20178e-163		YOR052C	0.209502	0.0356868	0.285494		YOR052C	0.179645	0.0859601	0.318827
YOR230W	0.0649915	0.575851	0.999031		YOR230W	-0.119373	0.145285	0.16662		YOR230W	-0.184365	0.0251203	0.0318517		YOR230W	-0.0732443	0.381833	0.776947		YOR230W	-0.138236	0.0859503	0.318827
YPR097W	-0.302207	0.0249681	0.475826		YPR097W	-0.0213603	0.820948	0.837741		YPR097W	0.280846	0.00352325	0.00485685		YPR097W	-0.154213	0.136703	0.521355		YPR097W	0.147993	0.0860511	0.318938
YDR088C	-0.201048	0.398398	0.999031		YDR088C	2.40084	1.5235e-49	9.09855e-49		YDR088C	2.60188	1.97292e-50	1.45443e-49		YDR088C	0.089322	0.593307	#N/A		YDR088C	0.29037	0.0865523	0.319394
YGL245W	-0.00934479	0.917223	0.999031		YGL245W	0.137747	0.0301275	0.0371982		YGL245W	0.147092	0.0207975	0.0265743		YGL245W	-0.117393	0.0670099	0.387336		YGL245W	-0.108048	0.0866212	0.319394
YGR023W	-0.0161211	0.947941	0.999031		YGR023W	-2.7353	1.84204e-61	1.36141e-60		YGR023W	-2.71918	9.3222e-50	6.77734e-49		YGR023W	0.170511	0.441593	0.8069		YGR023W	0.186632	0.0866029	0.319394
YLR060W	0.000162524	0.99857	0.999505		YLR060W	-0.0404863	0.526786	0.557213		YLR060W	-0.0406488	0.526918	0.559603		YLR060W	-0.107387	0.100926	0.470365		YLR060W	-0.10755	0.0863736	0.319394
YBR234C	0.204117	0.0559515	0.737166		YBR234C	0.865291	4.00789e-31	1.54831e-30		YBR234C	0.661174	5.12688e-18	1.52072e-17		YBR234C	0.0818446	0.302951	0.718677		YBR234C	-0.122273	0.0865942	0.319394
YBR271W	0.0806612	0.643334	0.999031		YBR271W	0.0840491	0.489549	0.520106		YBR271W	0.00338788	0.978326	0.980699		YBR271W	-0.101468	0.462172	0.81744		YBR271W	-0.18213	0.086663	0.319394
YCL050C	-0.0590916	0.547201	0.999031		YCL050C	0.65327	4.19185e-21	1.24401e-20		YCL050C	0.712361	1.24923e-24	4.58903e-24		YCL050C	-0.176015	0.0127041	0.177161		YCL050C	-0.116924	0.0863168	0.319394
YFL002C	-0.00536726	0.968573	0.999031		YFL002C	0.143041	0.133893	0.154013		YFL002C	0.148408	0.126898	0.148746		YFL002C	-0.150728	0.157416	0.549817		YFL002C	-0.14536	0.0865479	0.319394
YGL172W	0.139347	0.203587	0.982177		YGL172W	0.689773	2.23706e-19	6.26919e-19		YGL172W	0.550426	2.14662e-12	5.11213e-12		YGL172W	0.0149706	0.855218	0.962932		YGL172W	-0.124376	0.0869758	0.320321
YML124C	0.0127083	0.92356	0.999031		YML124C	-0.127752	0.170788	0.193985		YML124C	-0.14046	0.135257	0.157904		YML124C	-0.139271	0.156284	0.549402		YML124C	-0.15198	0.0871118	0.320596
YDR232W	-0.00798658	0.941227	0.999031		YDR232W	-0.200412	0.00866994	0.011247		YDR232W	-0.192426	0.0122715	0.0160523		YDR232W	-0.133953	0.0917308	0.449777		YDR232W	-0.125967	0.0872027	0.320705
YER096W	0.267066	0.501659	#N/A		YER096W	-0.101442	0.714143	0.738122		YER096W	-0.368508	0.196223	0.224194		YER096W	-0.108674	0.742838	#N/A		YER096W	-0.375741	0.0872842	0.320779
YLR359W	-0.0476151	0.661536	0.999031		YLR359W	0.28649	0.00018296	0.000270998		YLR359W	0.334105	1.52091e-05	2.52699e-05		YLR359W	-0.171874	0.0335581	0.27887		YLR359W	-0.124259	0.0875288	0.321452
YHR177W	-0.118814	0.659075	#N/A		YHR177W	-1.40725	1.84622e-13	4.22296e-13		YHR177W	-1.28843	1.08796e-11	2.5004e-11		YHR177W	-0.344814	0.141542	#N/A		YHR177W	-0.226	0.0876304	0.321599
YDR388W	0.144405	0.160911	0.951618		YDR388W	0.637692	1.03006e-18	2.83449e-18		YDR388W	0.493287	1.87138e-11	4.25194e-11		YDR388W	0.0259976	0.732645	0.930159		YDR388W	-0.118408	0.0879929	0.32225
YEL063C	0.27269	0.264884	0.997029		YEL063C	-3.35962	9.44685e-94	1.16565e-92		YEL063C	-3.63231	9.11601e-89	1.29937e-87		YEL063C	0.119622	0.599073	0.875694		YEL063C	-0.153069	0.0879882	0.32225
YCL001W	0.109959	0.416526	0.999031		YCL001W	-0.15417	0.103251	0.120007		YCL001W	-0.264129	0.00634137	0.00851622		YCL001W	-0.0374464	0.719256	0.922863		YCL001W	-0.147406	0.0879816	0.32225
YJL145W	0.0704817	0.558703	0.999031		YJL145W	0.604343	8.13506e-13	1.82471e-12		YJL145W	0.533861	5.44515e-10	1.15722e-09		YJL145W	-0.0647838	0.475246	0.818542		YJL145W	-0.135266	0.0881908	0.322667
YHR186C	0.0885187	0.50475	0.999031		YHR186C	-1.70675	9.82782e-80	9.94293e-79		YHR186C	-1.79527	4.70449e-76	5.57887e-75		YHR186C	0.213961	0.0526936	0.34969		YHR186C	0.125443	0.0882302	0.322667
YPL118W	0.0651167	0.631599	0.999031		YPL118W	0.8417	3.71002e-19	1.0332e-18		YPL118W	0.776583	2.18933e-15	5.89012e-15		YPL118W	0.219055	0.0307171	0.267556		YPL118W	0.153938	0.0884669	0.323306
YMR160W	-0.17701	0.405843	0.999031		YMR160W	-1.09	8.03046e-14	1.86561e-13		YMR160W	-0.912987	3.94225e-09	8.03302e-09		YMR160W	0.0135887	0.940199	0.984582		YMR160W	0.190599	0.0887135	0.323755
YJR051W	-0.0549242	0.723498	0.999031		YJR051W	1.10955	2.71976e-24	8.75376e-24		YJR051W	1.16447	5.41763e-26	2.07628e-25		YJR051W	-0.22824	0.0514832	0.346802		YJR051W	-0.173316	0.0886932	0.323755
YOR348C	0.229065	0.23791	0.982177		YOR348C	0.700175	1.1832e-07	2.1036e-07		YOR348C	0.47111	0.000914836	0.00133019		YOR348C	0.441589	0.00294829	0.0702274		YOR348C	0.212524	0.0889257	0.323927
YGR060W	-0.0740008	0.406458	0.999031		YGR060W	0.193069	0.00216421	0.00296013		YGR060W	0.267069	2.31825e-05	3.79941e-05		YGR060W	-0.179539	0.00503006	0.0984654		YGR060W	-0.105538	0.0889466	0.323927
YJR091C	-0.0869672	0.506656	0.999031		YJR091C	-1.58028	1.92658e-67	1.5703e-66		YJR091C	-1.49331	1.06233e-56	8.90976e-56		YJR091C	0.050829	0.621374	0.883523		YJR091C	0.137796	0.0888953	0.323927
YBR154C	0.0282408	0.789595	0.999031		YBR154C	2.07242	6.10369e-171	1.54921e-169		YBR154C	2.04418	3.06085e-162	8.90107e-161		YBR154C	-0.0975441	0.197157	0.61298		YBR154C	-0.125785	0.0893014	0.324955
YER003C	0.0206925	0.827011	0.999031		YER003C	0.448436	1.79308e-11	3.78845e-11		YER003C	0.427744	1.94281e-10	4.22829e-10		YER003C	-0.0897709	0.19214	0.608932		YER003C	-0.110464	0.0893532	0.324955
YER091C	-0.13727	0.276365	0.999031		YER091C	-0.088655	0.320087	0.349236		YER091C	0.0486154	0.585648	0.616769		YER091C	-0.288235	0.0012714	0.0395381		YER091C	-0.150965	0.0894584	0.325111
YDL132W	-0.136825	0.225929	0.982177		YDL132W	-0.869138	2.69607e-28	9.67877e-28		YDL132W	-0.732313	1.54457e-19	4.84205e-19		YDL132W	-0.0167502	0.849197	0.962932		YDL132W	0.120075	0.0897113	0.325126
YDL117W	-0.23963	0.0766465	0.822905		YDL117W	-1.15248	3.21182e-34	1.34492e-33		YDL117W	-0.912848	4.52327e-21	1.48982e-20		YDL117W	-0.101636	0.34753	0.752645		YDL117W	0.137994	0.0897087	0.325126
YOR204W	0.128687	0.118792	0.896961		YOR204W	0.816186	1.14259e-44	6.09416e-44		YOR204W	0.687499	6.30957e-32	2.87734e-31		YOR204W	0.030717	0.602295	0.876862		YOR204W	-0.0979697	0.089615	0.325126
YMR088C	0.136721	0.343722	0.999031		YMR088C	-0.89328	4.29461e-19	1.19428e-18		YMR088C	-1.03	4.51528e-23	1.57885e-22		YMR088C	-0.00434677	0.970633	0.993165		YMR088C	-0.141067	0.0896671	0.325126
YPR008W	0.0429341	0.77128	0.999031		YPR008W	-0.291337	0.00422668	0.0056372		YPR008W	-0.334271	0.00177761	0.00252629		YPR008W	0.200092	0.0817723	0.427625		YPR008W	0.157158	0.0900671	0.325963
YHR121W	0.174009	0.202189	0.982177		YHR121W	0.4802	4.42972e-07	7.66591e-07		YHR121W	0.306191	0.00175081	0.00249186		YHR121W	0.0247073	0.812574	0.958276		YHR121W	-0.149302	0.0900571	0.325963
YJL090C	-0.345873	0.144465	0.930362		YJL090C	-2.16042	3.02552e-39	1.43279e-38		YJL090C	-1.81454	1.6436e-26	6.40507e-26		YJL090C	-0.158518	0.449503	0.809039		YJL090C	0.187355	0.0902765	0.326495
YJR089W	-0.16231	0.442434	0.999031		YJR089W	-0.126936	0.381286	0.41166		YJR089W	0.0353742	0.818017	0.837111		YJR089W	0.0473786	0.781911	#N/A		YJR089W	0.209689	0.0906953	0.327783
YGL038C	-0.160158	0.258227	0.992666		YGL038C	-0.937757	1.19902e-21	3.60453e-21		YGL038C	-0.777599	2.74332e-14	7.01839e-14		YGL038C	-0.0210927	0.854839	0.962932		YGL038C	0.139065	0.0911012	0.329022
YPL030W	0.0139064	0.913138	0.999031		YPL030W	0.225588	0.0115554	0.0147814		YPL030W	0.211682	0.0199554	0.0255434		YPL030W	-0.123533	0.208025	0.624531		YPL030W	-0.13744	0.0913144	0.329564
YJL162C	-0.26417	0.334317	#N/A		YJL162C	0.295297	0.117483	0.135785		YJL162C	0.559466	0.00476264	0.00649421		YJL162C	0.0239206	0.910906	#N/A		YJL162C	0.28809	0.0916411	0.330515
YPL266W	-0.0228498	0.855984	0.999031		YPL266W	0.0594231	0.502693	0.533287		YPL266W	0.0822729	0.357392	0.390822		YPL266W	-0.164553	0.079148	0.419669		YPL266W	-0.141703	0.0918522	0.331048
YBL091C	0.0511341	0.65855	0.999031		YBL091C	0.309724	0.000138831	0.000207012		YBL091C	0.258589	0.00168832	0.00240647		YBL091C	-0.0791855	0.357558	0.756255		YBL091C	-0.13032	0.0919688	0.33124
YML053C	-0.26352	0.174145	0.961848		YML053C	1.2094	1.66479e-19	4.68814e-19		YML053C	1.47292	8.5791e-26	3.27057e-25		YML053C	-0.0486929	0.738816	0.932211		YML053C	0.214827	0.0921615	0.331477
YBR054W	0.254432	0.113203	0.889162		YBR054W	0.991303	1.20804e-19	3.42693e-19		YBR054W	0.736871	3.83167e-10	8.18828e-10		YBR054W	0.429832	0.000440805	0.0201007		YBR054W	0.175399	0.0921007	0.331477
YOR017W	0.0566423	0.772524	0.999031		YOR017W	-1.33311	1.03729e-23	3.282e-23		YOR017W	-1.38976	5.09389e-22	1.73097e-21		YOR017W	0.239608	0.141621	0.531274		YOR017W	0.182966	0.0923556	0.331946
YOR076C	0.00793906	0.960283	0.999031		YOR076C	-0.239457	0.0280417	0.0347117		YOR076C	-0.247396	0.033454	0.0419044		YOR076C	0.167392	0.191571	0.608932		YOR076C	0.159453	0.0925652	0.332243
YPR022C	-0.0853573	0.510667	0.999031		YPR022C	-1.08754	1.01562e-33	4.17131e-33		YPR022C	-1.00218	9.63162e-27	3.77374e-26		YPR022C	0.0455284	0.661069	0.900048		YPR022C	0.130886	0.0925556	0.332243
YGR262C	0.0744514	0.652748	0.999031		YGR262C	0.617253	9.62072e-08	1.71731e-07		YGR262C	0.542802	4.43911e-06	7.62968e-06		YGR262C	-0.102965	0.418744	0.79246		YGR262C	-0.177416	0.0931351	0.333674
YBR151W	0.240277	0.0784419	0.831223		YBR151W	-0.403531	1.97432e-05	3.11149e-05		YBR151W	-0.643808	6.30846e-11	1.40466e-10		YBR151W	0.0993721	0.356141	0.756255		YBR151W	-0.140904	0.0931898	0.333674
YNL250W	-0.120595	0.538393	0.999031		YNL250W	0.025858	0.847179	0.861621		YNL250W	0.146453	0.305394	0.337467		YNL250W	0.073297	0.643483	0.895204		YNL250W	0.193892	0.0932124	0.333674
YNL184C	0.917137	0.0373012	#N/A		YNL184C	3.43104	4.16669e-29	1.52805e-28		YNL184C	2.51391	1.92133e-15	5.17671e-15		YNL184C	0.37001	0.211588	#N/A		YNL184C	-0.547127	0.0932193	0.333674
YML007W	0.0551062	0.655793	0.999031		YML007W	-0.41948	1.00415e-06	1.70862e-06		YML007W	-0.474586	9.82651e-08	1.8463e-07		YML007W	0.188665	0.0460509	0.32585		YML007W	0.133559	0.0934895	0.334184
YHR183W	0.0100313	0.919667	0.999031		YHR183W	0.709431	5.81627e-24	1.85857e-23		YHR183W	0.6994	2.89534e-23	1.01856e-22		YHR183W	-0.107234	0.129619	0.514862		YHR183W	-0.117265	0.0934606	0.334184
YFL046W	0.204686	0.352316	0.999031		YFL046W	1.95681	2.56182e-37	1.15822e-36		YFL046W	1.75213	1.30178e-28	5.41191e-28		YFL046W	-0.044739	0.782577	#N/A		YFL046W	-0.249425	0.0937293	0.334812
YGR232W	0.155459	0.336578	0.999031		YGR232W	1.20647	8.92484e-27	3.07612e-26		YGR232W	1.05102	1.42846e-19	4.48048e-19		YGR232W	-0.021271	0.862327	0.963777		YGR232W	-0.17673	0.0938344	0.334958
YML105C	0.120266	0.318797	0.999031		YML105C	1.07188	7.4146e-37	3.31594e-36		YML105C	0.951617	2.07318e-28	8.57576e-28		YML105C	-0.0159486	0.857878	0.963777		YML105C	-0.136215	0.0941302	0.335785
YBR093C	0.0144567	0.926538	0.999031		YBR093C	0.566525	3.16867e-07	5.51159e-07		YBR093C	0.552068	6.48827e-07	1.16499e-06		YBR093C	-0.169385	0.129457	0.514862		YBR093C	-0.183842	0.0947363	0.337716
YDR281C	0.751007	0.0555277	#N/A		YDR281C	1.93445	1.23759e-12	2.74825e-12		YDR281C	1.18345	2.74353e-05	4.47486e-05		YDR281C	0.307999	0.286353	#N/A		YDR281C	-0.443009	0.0949635	0.337977
YOL052C	0.00531806	0.961813	0.999031		YOL052C	-0.460545	3.53963e-09	6.74475e-09		YOL052C	-0.465863	3.83289e-09	7.8212e-09		YOL052C	-0.114867	0.174366	0.573857		YOL052C	-0.120185	0.0951256	0.337977
YLR136C	-0.0302681	0.924688	#N/A		YLR136C	0.209872	0.334984	0.364252		YLR136C	0.240141	0.306468	0.338525		YLR136C	0.30103	0.230844	#N/A		YLR136C	0.331298	0.0951328	0.337977
YMR227C	-0.0264714	0.886725	0.999031		YMR227C	0.980603	1.38164e-14	3.31491e-14		YMR227C	1.00707	9.82966e-14	2.46359e-13		YMR227C	0.174308	0.218444	0.635634		YMR227C	0.200779	0.0951249	0.337977
YNL284C-B	-0.333582	0.00723257	0.249708		YNL284C-B	-3.89937	0	0		YNL284C-B	-3.56579	0	0		YNL284C-B	-0.189717	0.0339685	0.280718		YNL284C-B	0.143865	0.0948841	0.337977
YGL003C	-0.173943	0.347346	0.999031		YGL003C	-0.443819	0.000490267	0.00070349		YGL003C	-0.269876	0.0445723	0.0550565		YGL003C	0.00116448	0.993904	0.997079		YGL003C	0.175108	0.0954615	0.338914
YPR104C	-0.082651	0.619801	0.999031		YPR104C	-0.277566	0.0156996	0.0198413		YPR104C	-0.194915	0.106134	0.12527		YPR104C	0.0867474	0.510931	0.835822		YPR104C	0.169398	0.0957258	0.339498
YBR213W	-0.0264904	0.895472	0.999031		YBR213W	0.0389046	0.783878	0.804023		YBR213W	0.065395	0.648117	0.676891		YBR213W	-0.232057	0.145569	0.536763		YBR213W	-0.205567	0.095756	0.339498
YDR518W	-0.0593325	0.646024	0.999031		YDR518W	0.133103	0.1431	0.164244		YDR518W	0.192435	0.0360479	0.0449588		YDR518W	-0.199104	0.042538	0.311535		YDR518W	-0.139771	0.0960134	0.340016
YGR138C	-0.11379	0.421938	0.999031		YGR138C	-0.0443695	0.656832	0.683553		YGR138C	0.0694206	0.489808	0.523361		YGR138C	-0.262409	0.0170739	0.200777		YGR138C	-0.148619	0.0960322	0.340016
YDL082W	0.0891196	0.407951	0.999031		YDL082W	1.54679	7.61521e-92	9.2195e-91		YDL082W	1.45767	1.47783e-81	1.92618e-80		YDL082W	-0.0372226	0.625838	0.885235		YDL082W	-0.126342	0.0962843	0.340448
YHR209W	0.0686735	0.74723	0.999031		YHR209W	1.03432	9.1326e-13	2.0445e-12		YHR209W	0.965647	6.5082e-10	1.37808e-09		YHR209W	0.296615	0.0690762	0.3921		YHR209W	0.227942	0.0962495	0.340448
YOR078W	0.126535	0.491554	0.999031		YOR078W	2.13518	2.11326e-61	1.55789e-60		YOR078W	2.00865	4.65651e-53	3.6366e-52		YOR078W	-0.0866251	0.511198	0.835822		YOR078W	-0.21316	0.09658	0.341032
YCR020C-A	0.138874	0.615604	#N/A		YCR020C-A	3.49894	4.17278e-72	3.66989e-71		YCR020C-A	3.36006	1.13236e-65	1.12208e-64		YCR020C-A	-0.212924	0.231659	#N/A		YCR020C-A	-0.351797	0.0965451	0.341032
YGR062C	0.125077	0.625759	0.999031		YGR062C	-2.06225	1.815e-34	7.63329e-34		YGR062C	-2.18732	1.17078e-29	5.02246e-29		YGR062C	0.31191	0.175944	0.576667		YGR062C	0.186832	0.0967454	0.341385
YKL033W-A	0.027542	0.834608	0.999031		YKL033W-A	0.411039	9.28567e-06	1.48854e-05		YKL033W-A	0.383497	4.36271e-05	7.03064e-05		YKL033W-A	-0.118466	0.228176	0.644485		YKL033W-A	-0.146008	0.0969005	0.341702
YLR095C	-0.239804	0.0852834	0.838129		YLR095C	-1.29841	9.39516e-41	4.58044e-40		YLR095C	-1.05861	3.16981e-26	1.2221e-25		YLR095C	-0.105667	0.351906	0.756255		YLR095C	0.134137	0.09705	0.341768
YMR149W	0.0199972	0.852879	0.999031		YMR149W	0.648019	1.01682e-17	2.72675e-17		YMR149W	0.628022	3.15868e-16	8.75445e-16		YMR149W	-0.098086	0.226041	0.642334		YMR149W	-0.118083	0.0970208	0.341768
YDL070W	-0.216675	0.089076	0.838129		YDL070W	-0.926438	2.06452e-25	6.86236e-25		YDL070W	-0.709763	7.4653e-15	1.95889e-14		YDL070W	-0.0882185	0.382932	0.776947		YDL070W	0.128456	0.0976956	0.343578
YBR288C	-0.118332	0.419341	0.999031		YBR288C	-0.0664248	0.513078	0.543486		YBR288C	0.0519068	0.623124	0.653501		YBR288C	0.0334572	0.769808	0.947883		YBR288C	0.151789	0.0976571	0.343578
YER002W	0.0324426	0.796619	0.999031		YER002W	2.75477	7.14043e-215	2.43069e-213		YER002W	2.72233	3.75733e-201	1.48929e-199		YER002W	-0.117254	0.180517	0.586108		YER002W	-0.149697	0.097885	0.344013
YLR034C	-0.0712923	0.58025	0.999031		YLR034C	-0.726833	1.12182e-15	2.78387e-15		YLR034C	-0.655541	8.27766e-13	2.00514e-12		YLR034C	-0.205074	0.0410495	0.305971		YLR034C	-0.133782	0.0981562	0.344503
YKL183W	0.104943	0.515483	0.999031		YKL183W	0.0475749	0.672224	0.698163		YKL183W	-0.0573682	0.620143	0.650729		YKL183W	-0.058624	0.645712	0.897343		YKL183W	-0.163567	0.0981201	0.344503
YGR009C	-0.0645349	0.604894	0.999031		YGR009C	1.11667	4.1232e-38	1.90279e-37		YGR009C	1.18121	1.78971e-39	1.01143e-38		YGR009C	0.0729378	0.432711	0.801374		YGR009C	0.137473	0.0983174	0.344837
YDL085C-A	0.405026	0.317449	#N/A		YDL085C-A	4.98236	1.883e-65	1.48662e-64		YDL085C-A	4.57733	1.50332e-59	1.3282e-58		YDL085C-A	-0.169971	0.412302	#N/A		YDL085C-A	-0.574997	0.0985518	0.345427
YKR077W	0.175704	0.202764	0.982177		YKR077W	-0.276024	0.00325466	0.00439242		YKR077W	-0.451728	7.96301e-06	1.34861e-05		YKR077W	0.312611	0.00457955	0.0939573		YKR077W	0.136907	0.0986233	0.345446
YDR485C	-0.0401917	0.805679	0.999031		YDR485C	0.215401	0.054979	0.0660364		YDR485C	0.255593	0.0313218	0.0393272		YDR485C	0.126514	0.324589	0.734546		YDR485C	0.166705	0.0987785	0.345758
YJL201W	-0.181499	0.223158	0.982177		YJL201W	-1.4675	5.70682e-46	3.14827e-45		YJL201W	-1.28601	5.99108e-33	2.81415e-32		YJL201W	-0.0472264	0.705068	0.917278		YJL201W	0.134272	0.0991259	0.346742
YOR355W	-0.193306	0.12599	0.909295		YOR355W	-1.57248	1.89105e-70	1.61886e-69		YOR355W	-1.37917	5.89338e-53	4.584e-52		YOR355W	-0.058233	0.544716	0.848088		YOR355W	0.135073	0.0993391	0.347003
YBL086C	-0.185831	0.351465	0.999031		YBL086C	0.10092	0.463058	0.493502		YBL086C	0.286751	0.0471205	0.0580554		YBL086C	0.0141446	0.928788	0.980135		YBL086C	0.199976	0.0993951	0.347003
YNL246W	0.0722818	0.674105	0.999031		YNL246W	-0.18104	0.131642	0.151545		YNL246W	-0.253322	0.0394222	0.0489984		YNL246W	-0.100295	0.461808	0.817275		YNL246W	-0.172576	0.0993999	0.347003
YPR041W	0.0158228	0.871693	0.999031		YPR041W	1.37887	1.26356e-88	1.4832e-87		YPR041W	1.36305	9.85819e-86	1.36156e-84		YPR041W	-0.0968285	0.167391	0.562631		YPR041W	-0.112651	0.0995897	0.347434
YJL155C	0.0614446	0.738723	0.999031		YJL155C	-0.0990825	0.427572	0.458045		YJL155C	-0.160527	0.235855	0.266061		YJL155C	0.23916	0.10909	0.485151		YJL155C	0.177715	0.099765	0.347813
YDR059C	0.0685614	0.780781	#N/A		YDR059C	1.59021	6.54202e-22	1.98109e-21		YDR059C	1.52165	8.09376e-17	2.28147e-16		YDR059C	0.334944	0.0712121	#N/A		YDR059C	0.266383	0.0999737	0.348233
YDR334W	-0.121035	0.477328	0.999031		YDR334W	-1.40337	3.30159e-33	1.33517e-32		YDR334W	-1.28234	4.14798e-25	1.55067e-24		YDR334W	0.0277989	0.847236	0.962932		YDR334W	0.148834	0.100019	0.348233
YJR088C	0.0146213	0.916087	0.999031		YJR088C	1.24793	1.32304e-37	6.02394e-37		YJR088C	1.23331	1.04374e-35	5.32171e-35		YJR088C	-0.13854	0.177899	0.580363		YJR088C	-0.153161	0.100238	0.348765
YJL115W	-0.242111	0.132969	0.916564		YJL115W	0.420196	0.000176387	0.00026153		YJL115W	0.662307	1.07529e-08	2.13471e-08		YJL115W	-0.0736189	0.553627	0.851141		YJL115W	0.168492	0.100413	0.349022
YIL138C	0.192778	0.159081	0.951618		YIL138C	1.27192	2.67165e-40	1.28948e-39		YIL138C	1.07914	2.90015e-28	1.19368e-27		YIL138C	0.0409415	0.685167	0.908424		YIL138C	-0.151836	0.100446	0.349022
YMR220W	-0.011367	0.925545	0.999031		YMR220W	-0.341162	6.44127e-05	9.80422e-05		YMR220W	-0.329795	0.000140906	0.000217969		YMR220W	-0.138657	0.139059	0.52502		YMR220W	-0.12729	0.100588	0.349284
YDR104C	-0.26991	0.321478	#N/A		YDR104C	-1.20122	1.43917e-10	2.92638e-10		YDR104C	-0.931311	2.41923e-06	4.20548e-06		YDR104C	-0.035361	0.878688	#N/A		YDR104C	0.234548	0.100919	0.350074
YGL169W	-0.0176151	0.906112	0.999031		YGL169W	-0.340226	0.00117181	0.00163522		YGL169W	-0.322611	0.00242536	0.00340256		YGL169W	-0.169556	0.147819	0.539647		YGL169W	-0.15194	0.10095	0.350074
YLR212C	0.179737	0.237692	0.982177		YLR212C	-0.368562	0.000459596	0.000661777		YLR212C	-0.548299	6.22827e-07	1.12074e-06		YLR212C	0.0335809	0.78545	0.953341		YLR212C	-0.146156	0.101242	0.350624
YNL273W	-0.354386	0.026639	0.495199		YNL273W	-1.41178	2.03866e-36	9.01278e-36		YNL273W	-1.05739	1.84472e-20	5.98062e-20		YNL273W	-0.208736	0.116249	0.49512		YNL273W	0.145649	0.101205	0.350624
YOL146W	0.217415	0.346882	#N/A		YOL146W	0.22011	0.16804	0.191126		YOL146W	0.00269507	0.987133	0.9885		YOL146W	-0.00184375	0.992191	#N/A		YOL146W	-0.219259	0.101587	0.351584
YGL114W	0.236997	0.137385	0.92283		YGL114W	-0.375473	0.000633608	0.000901571		YGL114W	-0.612469	1.18294e-07	2.2147e-07		YGL114W	0.0844106	0.514299	0.836246		YGL114W	-0.152586	0.101795	0.351607
YBR125C	-0.0067012	0.966127	0.999031		YBR125C	-0.371114	0.000773362	0.00109371		YBR125C	-0.364413	0.00123177	0.00177585		YBR125C	-0.157665	0.218178	0.635487		YBR125C	-0.150964	0.101686	0.351607
YJL014W	0.0750114	0.457751	0.999031		YJL014W	0.134463	0.058616	0.07023		YJL014W	0.0594511	0.407372	0.441803		YJL014W	-0.0378496	0.608111	0.879073		YJL014W	-0.112861	0.101729	0.351607
YPR140W	0.142532	0.444742	0.999031		YPR140W	-1.0154	3.2034e-15	7.84181e-15		YPR140W	-1.15793	9.09614e-18	2.66934e-17		YPR140W	-0.0216109	0.890669	0.972587		YPR140W	-0.164143	0.101863	0.351608
YIL154C	0.35156	0.0221958	0.449997		YIL154C	0.288458	0.00675313	0.00884772		YIL154C	-0.0631015	0.569221	0.601		YIL154C	0.19048	0.106385	0.483471		YIL154C	-0.16108	0.102177	0.35246
YOR267C	-0.111586	0.424606	0.999031		YOR267C	-1.00564	6.43928e-25	2.11368e-24		YOR267C	-0.894057	4.09533e-19	1.26466e-18		YOR267C	0.0349806	0.744005	0.933871		YOR267C	0.146566	0.102475	0.353256
YBR083W	0.0193149	0.867252	0.999031		YBR083W	-0.809567	4.83467e-24	1.54833e-23		YBR083W	-0.828882	2.61242e-23	9.1959e-23		YBR083W	0.137431	0.12717	0.513687		YBR083W	0.118116	0.102578	0.353376
YBL064C	0.212634	0.212952	0.982177		YBL064C	0.943683	6.69375e-16	1.68055e-15		YBL064C	0.731049	4.27068e-09	8.67173e-09		YBL064C	0.394987	0.00220765	0.0584528		YBL064C	0.182352	0.102796	0.353893
YMR209C	0.000700234	0.996744	0.999505		YMR209C	-0.673126	2.01646e-08	3.71277e-08		YMR209C	-0.673826	3.94798e-08	7.58531e-08		YMR209C	-0.158188	0.262708	0.680223		YMR209C	-0.158888	0.102933	0.354134
YLL060C	0.447924	0.186686	#N/A		YLL060C	-0.961598	1.15985e-05	1.84854e-05		YLL060C	-1.40952	5.1459e-08	9.81519e-08		YLL060C	0.746352	0.00894698	#N/A		YLL060C	0.298428	0.103277	0.355084
YDL054C	0.057997	0.736609	0.999031		YDL054C	-0.368962	0.00213732	0.00292473		YDL054C	-0.426959	0.000555329	0.000819819		YDL054C	-0.1048	0.45565	0.812598		YDL054C	-0.162797	0.103511	0.355419
YNL080C	-0.0744729	0.682031	0.999031		YNL080C	-1.86181	3.68274e-48	2.13334e-47		YNL080C	-1.78734	2.08933e-43	1.30855e-42		YNL080C	-0.226604	0.146133	0.537874		YNL080C	-0.152131	0.103507	0.355419
YLR347C	0.0797727	0.417896	0.999031		YLR347C	-0.491217	1.31805e-12	2.92243e-12		YLR347C	-0.57099	3.44705e-16	9.54454e-16		YLR347C	-0.0283221	0.696703	0.913122		YLR347C	-0.108095	0.103871	0.356304
YMR276W	0.150992	0.129911	0.915939		YMR276W	1.38762	5.65392e-87	6.42815e-86		YMR276W	1.23663	2.57517e-68	2.68998e-67		YMR276W	0.0380698	0.594567	0.872672		YMR276W	-0.112922	0.103973	0.356304
YKL003C	-0.0352533	0.852698	0.999031		YKL003C	0.89117	6.66963e-12	1.43111e-11		YKL003C	0.926423	2.28023e-11	5.16465e-11		YKL003C	0.161496	0.269667	0.690328		YKL003C	0.196749	0.103965	0.356304
YER020W	0.309363	0.0984484	0.865372		YER020W	2.25762	5.03884e-68	4.16569e-67		YER020W	1.94826	4.25156e-47	2.88438e-46		YER020W	0.0996654	0.462395	0.81744		YER020W	-0.209698	0.104227	0.356939
YDR397C	0.201338	0.26352	0.995771		YDR397C	3.4063	1.58933e-162	3.86447e-161		YDR397C	3.20497	9.511e-136	2.27439e-134		YDR397C	-0.0184357	0.876653	0.964749		YDR397C	-0.219774	0.104409	0.35733
YBR129C	0.10775	0.599516	0.999031		YBR129C	0.623715	6.88256e-06	1.11162e-05		YBR129C	0.515965	0.000645892	0.000950122		YBR129C	0.312959	0.0527432	0.34969		YBR129C	0.205209	0.104771	0.3581
YAR031W	0.345404	0.278748	#N/A		YAR031W	2.07382	1.03166e-20	3.01984e-20		YAR031W	1.72841	4.13374e-14	1.0543e-13		YAR031W	-0.00450359	0.984704	#N/A		YAR031W	-0.349907	0.104714	0.3581
YBL033C	0.14947	0.394469	0.999031		YBL033C	2.61477	8.04802e-101	1.0806e-99		YBL033C	2.4653	7.66084e-86	1.06315e-84		YBL033C	-0.0530213	0.667373	0.904252		YBL033C	-0.202491	0.104845	0.358118
YJL192C	-0.11622	0.324701	0.999031		YJL192C	-0.729177	1.70635e-18	4.67328e-18		YJL192C	-0.612957	2.57106e-13	6.34759e-13		YJL192C	-0.234314	0.0115629	0.168875		YJL192C	-0.118094	0.105296	0.359423
YLR142W	0.229623	0.178521	0.971926		YLR142W	0.120357	0.299616	0.32851		YLR142W	-0.109266	0.382713	0.416856		YLR142W	0.401268	0.0026984	0.0671165		YLR142W	0.171646	0.1055	0.35966
YNL326C	0.334303	0.170257	0.9581		YNL326C	-0.892944	6.76175e-08	1.21749e-07		YNL326C	-1.22725	7.14535e-12	1.66065e-11		YNL326C	0.132355	0.527399	#N/A		YNL326C	-0.201949	0.105503	0.35966
YGR161W-C	0.769211	0.00625239	#N/A		YGR161W-C	3.93125	3.32217e-91	3.99696e-90		YGR161W-C	3.16204	2.24472e-54	1.8067e-53		YGR161W-C	0.416059	0.0189255	#N/A		YGR161W-C	-0.353152	0.10595	0.360582
YMR265C	-0.0108211	0.974922	#N/A		YMR265C	0.903561	0.000215521	0.000317844		YMR265C	0.914382	0.000163889	0.000251905		YMR265C	-0.357926	0.183411	#N/A		YMR265C	-0.347105	0.105965	0.360582
YNL062C	0.0536611	0.699409	0.999031		YNL062C	0.302283	0.00195785	0.00268867		YNL062C	0.248622	0.0119568	0.0156583		YNL062C	-0.0955331	0.357872	0.756285		YNL062C	-0.149194	0.105981	0.360582
YPR103W	0.14497	0.247593	0.986566		YPR103W	1.05164	7.56213e-33	3.03692e-32		YPR103W	0.906672	2.91594e-24	1.06063e-23		YPR103W	0.0061483	0.946293	0.985155		YPR103W	-0.138821	0.10635	0.361368
YBL079W	-0.168936	0.123979	0.905371		YBL079W	-1.83335	4.69545e-126	8.3866e-125		YBL079W	-1.66441	1.09365e-99	1.80827e-98		YBL079W	-0.059397	0.491631	0.825892		YBL079W	0.109539	0.106334	0.361368
YDR270W	0.120032	0.503225	0.999031		YDR270W	-1.0993	1.30195e-19	3.6897e-19		YDR270W	-1.21933	2.55721e-20	8.24433e-20		YDR270W	0.283192	0.0558255	0.357981		YDR270W	0.163161	0.106572	0.361887
YGL151W	-0.326718	0.0142361	0.367037		YGL151W	-1.40995	2.5458e-51	1.57567e-50		YGL151W	-1.08324	3.69324e-30	1.59856e-29		YGL151W	-0.198286	0.0635784	0.380358		YGL151W	0.128431	0.106765	0.362309
YGL073W	0.00727353	0.958743	0.999031		YGL073W	-1.10758	2.57749e-30	9.73627e-30		YGL073W	-1.11485	8.05741e-28	3.263e-27		YGL073W	0.142244	0.207496	0.624465		YGL073W	0.13497	0.107553	0.364272
YPR019W	-0.0796287	0.49593	0.999031		YPR019W	-1.0633	3.42237e-39	1.6194e-38		YPR019W	-0.983668	1.4969e-31	6.75705e-31		YPR019W	0.0353571	0.702583	0.915656		YPR019W	0.114986	0.107428	0.364272
YHR080C	0.18709	0.441369	0.999031		YHR080C	-2.14701	2.86424e-41	1.42156e-40		YHR080C	-2.3341	3.78209e-37	2.01723e-36		YHR080C	0.368229	0.0873161	0.442573		YHR080C	0.181139	0.107545	0.364272
YLR177W	0.764105	0.000452489	0.0386356		YLR177W	-0.373504	0.00723326	0.00944469		YLR177W	-1.13761	1.17157e-11	2.68509e-11		YLR177W	0.957889	1.31308e-07	2.99383e-05		YLR177W	0.193784	0.10768	0.364467
YCR024C-B	1.87904	0.237409	0.982177		YCR024C-B	-8.19266	2.54042e-29	9.36993e-29		YCR024C-B	-10.0717	1.04215e-12	2.51498e-12		YCR024C-B	1.70921	0.281445	0.701864		YCR024C-B	-0.169837	0.107768	0.364528
YNL087W	-0.0793594	0.426188	0.999031		YNL087W	-0.350402	5.99164e-07	1.03103e-06		YNL087W	-0.271042	0.000130184	0.00020214		YNL087W	-0.184054	0.0147805	0.1878		YNL087W	-0.104694	0.108101	0.365417
YDR296W	-0.0129887	0.930015	0.999031		YDR296W	1.06906	8.59587e-26	2.88875e-25		YDR296W	1.08205	6.27904e-24	2.25275e-23		YDR296W	0.142514	0.202413	0.621223		YDR296W	0.155503	0.108208	0.365543
YNL096C	0.19317	0.0750295	0.822067		YNL096C	2.2893	3.72887e-196	1.10097e-194		YNL096C	2.09613	6.77114e-164	1.98906e-162		YNL096C	0.0700857	0.36151	0.758895		YNL096C	-0.123084	0.108282	0.365558
YDR487C	0.0388806	0.714676	0.999031		YDR487C	0.218024	0.00354263	0.00476219		YDR487C	0.179143	0.0178674	0.0230287		YDR487C	-0.0758956	0.33511	0.745415		YDR487C	-0.114776	0.108379	0.365648
YNL201C	-0.186132	0.197845	0.982177		YNL201C	-0.54273	6.33622e-08	1.1423e-07		YNL201C	-0.356598	0.000609565	0.000898282		YNL201C	-0.0476837	0.680877	0.907259		YNL201C	0.138449	0.108711	0.366533
YKL077W	0.111339	0.317114	0.999031		YKL077W	0.0540445	0.488022	0.51877		YKL077W	-0.0572941	0.47083	0.504479		YKL077W	-0.00601789	0.94277	0.985101		YKL077W	-0.117357	0.108908	0.366959
YLR117C	-0.310091	0.0890845	0.838129		YLR117C	0.0762893	0.547391	0.577424		YLR117C	0.38638	0.00320495	0.00443286		YLR117C	-0.133248	0.35872	0.756668		YLR117C	0.176843	0.109143	0.367473
YNL139C	-0.103933	0.361726	0.999031		YNL139C	-0.497618	3.56756e-10	7.12896e-10		YNL139C	-0.393685	1.48497e-06	2.61759e-06		YNL139C	0.0112302	0.898917	0.973168		YNL139C	0.115163	0.109201	0.367473
YOL137W	-0.00352739	0.984081	0.9991		YOL137W	0.634958	3.0131e-07	5.24889e-07		YOL137W	0.638485	4.085e-07	7.42459e-07		YOL137W	-0.181623	0.185716	0.594986		YOL137W	-0.178096	0.110017	0.369981
YNR033W	-0.0486216	0.703986	0.999031		YNR033W	-0.84991	2.80531e-21	8.35958e-21		YNR033W	-0.801288	1.57694e-18	4.77287e-18		YNR033W	-0.171132	0.0948469	0.458483		YNR033W	-0.122511	0.110109	0.370051
YOR356W	0.186411	0.159696	0.951618		YOR356W	-0.00110828	0.990403	0.991431		YOR356W	-0.187519	0.0491527	0.0604691		YOR356W	0.0532858	0.605151	0.877576		YOR356W	-0.133125	0.110374	0.370464
YGL028C	-0.0418672	0.657189	0.999031		YGL028C	-0.490058	1.15334e-13	2.66335e-13		YGL028C	-0.448191	2.8986e-11	6.5422e-11		YGL028C	0.0579419	0.412156	0.789656		YGL028C	0.099809	0.110355	0.370464
YHR047C	0.0715983	0.511185	0.999031		YHR047C	0.247263	0.00126365	0.00176042		YHR047C	0.175664	0.02328	0.0296156		YHR047C	-0.0468572	0.556798	0.852234		YHR047C	-0.118456	0.110772	0.371361
YHR159W	-0.215452	0.39127	0.999031		YHR159W	-0.206883	0.23235	0.259027		YHR159W	0.0085692	0.962462	0.966974		YHR159W	0.0250596	0.900792	#N/A		YHR159W	0.240512	0.110783	0.371361
YNL270C	0.00938646	0.977719	#N/A		YNL270C	1.62073	1.00256e-11	2.1401e-11		YNL270C	1.61134	1.08902e-11	2.50185e-11		YNL270C	-0.344491	0.172136	#N/A		YNL270C	-0.353878	0.110959	0.371712
YIL095W	-0.161136	0.295913	0.999031		YIL095W	-1.11577	1.22031e-25	4.08913e-25		YIL095W	-0.954632	1.01938e-17	2.9854e-17		YIL095W	-0.0228555	0.85753	0.963777		YIL095W	0.13828	0.111671	0.373681
YCR060W	0.135356	0.456157	0.999031		YCR060W	0.397647	0.00161828	0.00223668		YCR060W	0.26229	0.0447766	0.0552971		YCR060W	-0.0399271	0.782153	0.952227		YCR060W	-0.175284	0.11169	0.373681
YDR372C	0.0809263	0.533344	0.999031		YDR372C	0.762431	4.8086e-17	1.26087e-16		YDR372C	0.681505	2.14982e-13	5.3235e-13		YDR372C	-0.0545793	0.577803	0.861352		YDR372C	-0.135506	0.111824	0.373893
YDR032C	0.265668	0.0134987	0.35689		YDR032C	2.09343	6.2753e-171	1.58582e-169		YDR032C	1.82776	1.133e-124	2.48358e-123		YDR032C	0.146869	0.0572884	0.362704		YDR032C	-0.1188	0.112304	0.374798
YDR481C	-0.000288144	0.997976	0.999505		YDR481C	0.011244	0.888085	0.899274		YDR481C	0.0115321	0.88645	0.898562		YDR481C	-0.120413	0.155248	0.549402		YDR481C	-0.120125	0.112454	0.374798
YGR195W	-0.0467816	0.723827	0.999031		YGR195W	0.324105	0.000489973	0.000703242		YGR195W	0.370887	8.33188e-05	0.000131166		YGR195W	-0.181422	0.0743337	0.407842		YGR195W	-0.13464	0.112396	0.374798
YBL085W	-0.181023	0.118593	0.896961		YBL085W	-0.723055	4.4589e-19	1.23937e-18		YBL085W	-0.542032	6.56983e-11	1.46061e-10		YBL085W	-0.0655622	0.468152	0.818542		YBL085W	0.115461	0.112281	0.374798
YKR087C	0.107005	0.637839	0.999031		YKR087C	0.907329	1.09071e-08	2.03217e-08		YKR087C	0.800323	8.72756e-07	1.55788e-06		YKR087C	-0.119323	0.500376	#N/A		YKR087C	-0.226329	0.112376	0.374798
YLR238W	-0.292076	0.167389	0.956742		YLR238W	-0.65588	7.68799e-06	1.23894e-05		YLR238W	-0.363803	0.0170601	0.0220471		YLR238W	-0.105202	0.549402	0.850527		YLR238W	0.186875	0.112603	0.37485
YKL207W	-0.000693494	0.995556	0.999505		YKL207W	0.101471	0.245153	0.272147		YKL207W	0.102164	0.249793	0.280091		YKL207W	-0.127392	0.182358	0.589169		YKL207W	-0.126699	0.112613	0.37485
YPR053C	0.237288	0.153083	0.945011		YPR053C	4.21113	2.12996e-289	1.13083e-287		YPR053C	3.97384	2.14612e-244	1.0615e-242		YPR053C	0.0336726	0.749297	0.936393		YPR053C	-0.203616	0.112726	0.374989
YDR299W	-0.301866	0.0133754	0.35689		YDR299W	1.00069	1.18833e-31	4.66545e-31		YDR299W	1.30256	1.41083e-50	1.04405e-49		YDR299W	-0.171654	0.05718	0.362704		YDR299W	0.130212	0.112905	0.375345
YDR353W	0.107623	0.280198	0.999031		YDR353W	1.36046	1.19021e-83	1.28025e-82		YDR353W	1.25284	3.41484e-70	3.68688e-69		YDR353W	-0.00221945	0.975223	0.993165		YDR353W	-0.109843	0.11384	0.377042
YGL241W	-0.162062	0.239197	0.982177		YGL241W	-0.0955023	0.318705	0.348055		YGL241W	0.06656	0.501039	0.534079		YGL241W	-0.0250955	0.814688	0.959176		YGL241W	0.136967	0.113623	0.377042
YGR085C	0.0963763	0.347858	0.999031		YGR085C	1.74003	4.01498e-127	7.1934e-126		YGR085C	1.64366	2.35333e-113	4.49462e-112		YGR085C	-0.0182443	0.801903	0.956726		YGR085C	-0.114621	0.113727	0.377042
YML018C	-0.0997598	0.466995	0.999031		YML018C	-1.60202	5.34093e-62	3.98299e-61		YML018C	-1.50226	1.60644e-53	1.26827e-52		YML018C	-0.222234	0.0496279	0.339381		YML018C	-0.122474	0.113706	0.377042
YJL051W	-0.2642	0.105284	0.882851		YJL051W	-1.87587	3.56372e-61	2.61716e-60		YJL051W	-1.61167	3.44544e-43	2.15089e-42		YJL051W	-0.121828	0.370376	0.766914		YJL051W	0.142372	0.113848	0.377042
YIL048W	0.0101893	0.933147	0.999031		YIL048W	-1.04847	5.65998e-36	2.47016e-35		YIL048W	-1.05866	2.44729e-33	1.16468e-32		YIL048W	0.125159	0.19843	0.615538		YIL048W	0.114969	0.113682	0.377042
YDR261C	-0.134093	0.308126	0.999031		YDR261C	-0.929845	1.25469e-23	3.96337e-23		YDR261C	-0.795752	1.4349e-17	4.16645e-17		YDR261C	-0.263398	0.0105539	0.158657		YDR261C	-0.129305	0.114198	0.377597
YML086C	0.0156848	0.88596	0.999031		YML086C	0.454942	3.37638e-09	6.43793e-09		YML086C	0.439258	1.58271e-08	3.10795e-08		YML086C	-0.101365	0.207546	0.624465		YML086C	-0.11705	0.114233	0.377597
YNR035C	0.0348174	0.73489	0.999031		YNR035C	-0.0668638	0.35396	0.383374		YNR035C	-0.101681	0.165206	0.190562		YNR035C	-0.0718354	0.354212	0.756255		YNR035C	-0.106653	0.114221	0.377597
YMR137C	-0.000854861	0.998412	#N/A		YMR137C	-0.553288	0.0508867	0.0614143		YMR137C	-0.552433	0.0871155	0.103967		YMR137C	0.354621	0.3324	#N/A		YMR137C	0.355475	0.114487	0.378199
YDR194C	-0.124842	0.252289	0.986566		YDR194C	-0.146422	0.0552229	0.0663019		YDR194C	-0.0215799	0.781594	0.803104		YDR194C	-0.0108095	0.894702	0.972861		YDR194C	0.114032	0.11456	0.3782
YNL240C	-0.0348721	0.842946	0.999031		YNL240C	0.439185	0.000391075	0.00056806		YNL240C	0.474057	0.00015023	0.000231712		YNL240C	-0.2147	0.1093	0.485151		YNL240C	-0.179828	0.114796	0.378499
YNL004W	0.144289	0.281081	0.999031		YNL004W	2.20761	6.35421e-123	1.09767e-121		YNL004W	2.06332	3.69101e-103	6.2639e-102		YNL004W	-0.00313503	0.973897	0.993165		YNL004W	-0.147424	0.114789	0.378499
YNL054W	-0.0187312	0.906018	0.999031		YNL054W	-0.818085	1.04678e-13	2.42309e-13		YNL054W	-0.799354	2.6767e-12	6.34838e-12		YNL054W	0.139366	0.256989	0.675946		YNL054W	0.158097	0.114873	0.378515
YGL147C	-0.0161664	0.874896	0.999031		YGL147C	1.50104	5.07837e-95	6.37495e-94		YGL147C	1.51721	6.82124e-97	1.09651e-95		YGL147C	-0.130394	0.0729925	0.403178		YGL147C	-0.114228	0.115044	0.378841
YPR135W	-0.0951657	0.492829	0.999031		YPR135W	-0.313364	0.00109092	0.00152639		YPR135W	-0.218198	0.0295067	0.0371207		YPR135W	0.0376704	0.73249	0.930159		YPR135W	0.132836	0.115157	0.378974
YLR035C-A	-0.377143	0.00846166	0.274232		YLR035C-A	-6.07841	0	0		YLR035C-A	-5.70127	0	0		YLR035C-A	-0.236393	0.0346008	0.281364		YLR035C-A	0.140749	0.115566	0.379527
YMR300C	0.0322413	0.776087	0.999031		YMR300C	0.248981	0.00171822	0.00236972		YMR300C	0.21674	0.00737203	0.00982994		YMR300C	-0.0837239	0.330998	0.742302		YMR300C	-0.115965	0.115619	0.379527
YBR242W	-0.0603409	0.661374	0.999031		YBR242W	0.163299	0.0917228	0.107406		YBR242W	0.22364	0.0224642	0.0286281		YBR242W	-0.198798	0.0606767	0.373339		YBR242W	-0.138457	0.115684	0.379527
YKL173W	-0.308779	0.0371054	0.601271		YKL173W	-0.268333	0.00956312	0.0123256		YKL173W	0.0404462	0.702545	0.728086		YKL173W	-0.165808	0.156352	0.549402		YKL173W	0.142971	0.115629	0.379527
YKR039W	-0.00881395	0.979561	0.9991		YKR039W	0.774423	0.00145685	0.0020208		YKR039W	0.783237	0.00128258	0.00184542		YKR039W	-0.390917	0.108617	0.485151		YKR039W	-0.382103	0.115688	0.379527
YDL015C	0.0682362	0.543368	0.999031		YDL015C	0.167915	0.0334226	0.0410477		YDL015C	0.0996783	0.211864	0.240262		YDL015C	-0.0509109	0.538572	0.845596		YDL015C	-0.119147	0.116231	0.380057
YDR169C	-0.174792	0.217649	0.982177		YDR169C	-0.517683	1.51866e-07	2.69256e-07		YDR169C	-0.342891	0.000764161	0.00111728		YDR169C	-0.0383227	0.732443	0.930159		YDR169C	0.136469	0.115976	0.380057
YLL032C	-0.264813	0.111151	0.889162		YLL032C	-1.17505	3.07634e-24	9.89594e-24		YLL032C	-0.910233	2.4368e-14	6.25354e-14		YLL032C	-0.118556	0.38927	0.781133		YLL032C	0.146257	0.116242	0.380057
YPR004C	0.084071	0.505693	0.999031		YPR004C	-0.246046	0.00536985	0.00710131		YPR004C	-0.330117	0.000254326	0.000386195		YPR004C	-0.0431666	0.656023	0.900048		YPR004C	-0.127238	0.116286	0.380057
YMR013C	-0.0529277	0.772	0.999031		YMR013C	-1.39951	8.69482e-28	3.08126e-27		YMR013C	-1.34658	4.60123e-25	1.71789e-24		YMR013C	-0.205876	0.182917	0.589703		YMR013C	-0.152948	0.116008	0.380057
YBR153W	0.0649547	0.773802	0.999031		YBR153W	-0.0652386	0.669515	0.695848		YBR153W	-0.130193	0.434186	0.467989		YBR153W	0.273693	0.134333	#N/A		YBR153W	0.208738	0.116263	0.380057
YGL068W	0.105256	0.335831	0.999031		YGL068W	1.04654	1.64048e-42	8.37906e-42		YGL068W	0.941282	1.79141e-33	8.57477e-33		YGL068W	-0.0103641	0.897962	0.972871		YGL068W	-0.11562	0.116584	0.380792
YDR188W	0.0207031	0.846639	0.999031		YDR188W	0.982007	9.81881e-39	4.61213e-38		YDR188W	0.961304	1.00141e-36	5.27794e-36		YDR188W	-0.0954005	0.216689	0.633928		YDR188W	-0.116104	0.117281	0.382411
YOR209C	-0.0400403	0.697104	0.999031		YOR209C	0.0131596	0.855638	0.86885		YOR209C	0.0531999	0.467024	0.500783		YOR209C	-0.14631	0.0584532	0.366531		YOR209C	-0.106269	0.117299	0.382411
YGR035C	-0.0485782	0.835862	0.999031		YGR035C	0.000313181	0.998437	0.998437		YGR035C	0.0488914	0.775645	0.797275		YGR035C	0.170301	0.365707	#N/A		YGR035C	0.218879	0.117264	0.382411
YLR455W	-0.24167	0.17716	0.968973		YLR455W	0.308547	0.0128715	0.0163745		YLR455W	0.550217	2.04134e-05	3.35795e-05		YLR455W	-0.0689348	0.624986	0.885235		YLR455W	0.172735	0.117517	0.382884
YFL059W	0.42482	0.233896	#N/A		YFL059W	0.798144	0.00124741	0.00173821		YFL059W	0.373324	0.146845	0.170709		YFL059W	0.0766151	0.783587	#N/A		YFL059W	-0.348205	0.117734	0.383132
YFL024C	-0.173918	0.393208	0.999031		YFL024C	0.103943	0.458757	0.489189		YFL024C	0.277861	0.0599042	0.0728359		YFL024C	0.0185864	0.908839	0.974876		YFL024C	0.192505	0.11774	0.383132
YDL115C	-0.0371479	0.869102	0.999031		YDL115C	2.04475	7.55143e-41	3.69713e-40		YDL115C	2.0819	3.44085e-36	1.77788e-35		YDL115C	0.205138	0.209788	#N/A		YDL115C	0.242286	0.118265	0.384323
YOL023W	-0.0316876	0.882908	0.999031		YOL023W	-0.897181	8.5651e-10	1.68192e-09		YOL023W	-0.865493	4.12723e-08	7.91394e-08		YOL023W	0.153294	0.39347	0.784746		YOL023W	0.184981	0.118198	0.384323
YIL009C-A	-0.46537	0.0507635	#N/A		YIL009C-A	-0.559936	0.000792792	0.00111927		YIL009C-A	-0.0945655	0.578047	0.609429		YIL009C-A	-0.257416	0.192548	#N/A		YIL009C-A	0.207954	0.118327	0.384323
YIL112W	-0.183349	0.219348	0.982177		YIL112W	0.12813	0.216282	0.242094		YIL112W	0.311479	0.0037446	0.00515216		YIL112W	-0.0380783	0.744183	0.933871		YIL112W	0.145271	0.118642	0.385108
YDR342C	-0.0679213	0.83352	0.999031		YDR342C	1.40378	7.72619e-10	1.51976e-09		YDR342C	1.4717	1.24613e-10	2.73571e-10		YDR342C	0.28758	0.208954	0.625008		YDR342C	0.355501	0.119122	0.386081
YGL041W-A	0.410162	0.0383721	0.615062		YGL041W-A	0.746361	3.83975e-08	6.99203e-08		YGL041W-A	0.336199	0.019751	0.0253042		YGL041W-A	0.218686	0.159294	0.552148		YGL041W-A	-0.191477	0.119025	0.386081
YPR021C	-0.0368808	0.859566	0.999031		YPR021C	-1.94138	3.31222e-43	1.72218e-42		YPR021C	-1.9045	2.77102e-35	1.392e-34		YPR021C	0.116892	0.524367	0.841385		YPR021C	0.153772	0.119197	0.386081
YFR031C	-0.299671	0.0865867	0.838129		YFR031C	-0.22702	0.0619972	0.0740664		YFR031C	0.0726511	0.563065	0.594919		YFR031C	-0.13955	0.323957	0.734546		YFR031C	0.160122	0.119238	0.386081
YNR052C	0.192496	0.0858392	0.838129		YNR052C	0.20623	0.00821696	0.0106809		YNR052C	0.0137342	0.864417	0.879154		YNR052C	0.0798568	0.350468	0.75566		YNR052C	-0.112639	0.119782	0.387364
YJL194W	-0.102851	0.540553	0.999031		YJL194W	-0.41539	0.000330189	0.000481918		YJL194W	-0.312539	0.010352	0.0136339		YJL194W	0.0509695	0.70764	0.917584		YJL194W	0.153821	0.119741	0.387364
YEL051W	0.0520327	0.619498	0.999031		YEL051W	0.811236	3.20625e-28	1.14889e-27		YEL051W	0.759204	2.32281e-24	8.47548e-24		YEL051W	-0.0588382	0.443594	0.808019		YEL051W	-0.110871	0.119886	0.38746
YOR346W	-0.331075	0.0598831	0.748961		YOR346W	-1.04719	1.7827e-17	4.73668e-17		YOR346W	-0.716112	1.22614e-08	2.42338e-08		YOR346W	-0.170219	0.231679	0.646811		YOR346W	0.160856	0.119996	0.387576
YMR226C	0.0418096	0.679657	0.999031		YMR226C	1.3052	8.91236e-75	8.23895e-74		YMR226C	1.26339	3.30334e-69	3.50761e-68		YMR226C	-0.0676151	0.35267	0.756255		YMR226C	-0.109425	0.120216	0.388047
YGR014W	0.00198987	0.987088	0.9991		YGR014W	-1.08035	9.1573e-36	3.97549e-35		YGR014W	-1.08234	2.90798e-35	1.45827e-34		YGR014W	0.133402	0.134591	0.520604		YGR014W	0.131412	0.12066	0.388646
YPL141C	-0.139487	0.316072	0.999031		YPL141C	-1.94652	1.02748e-90	1.22852e-89		YPL141C	-1.80703	1.68833e-72	1.90828e-71		YPL141C	-0.018354	0.873371	0.964749		YPL141C	0.121133	0.120773	0.388646
YML043C	-0.0562073	0.853427	#N/A		YML043C	-1.85315	9.86929e-20	2.80932e-19		YML043C	-1.79695	1.76606e-15	4.76465e-15		YML043C	0.158674	0.558081	#N/A		YML043C	0.214881	0.120623	0.388646
YKR071C	0.000438311	0.996828	0.999505		YKR071C	0.987665	2.27223e-37	1.02971e-36		YKR071C	0.987226	3.42035e-36	1.76886e-35		YKR071C	0.118322	0.138584	0.524192		YKR071C	0.117884	0.12073	0.388646
YFR025C	0.118792	0.535559	0.999031		YFR025C	1.58013	3.36127e-32	1.33322e-31		YFR025C	1.46133	1.98864e-26	7.71332e-26		YFR025C	-0.0790542	0.581119	0.864725		YFR025C	-0.197846	0.120493	0.388646
YDL240W	-0.127488	0.472604	0.999031		YDL240W	-1.39818	2.92229e-30	1.101e-29		YDL240W	-1.2707	5.14286e-23	1.79288e-22		YDL240W	0.0261235	0.85923	0.963777		YDL240W	0.153612	0.120915	0.38875
YMR002W	0.226742	0.0273801	0.502346		YMR002W	1.66181	1.86309e-117	3.01165e-116		YMR002W	1.43507	1.58525e-85	2.17906e-84		YMR002W	0.116125	0.116519	0.49512		YMR002W	-0.110617	0.121029	0.38875
YNL208W	0.312611	0.0196192	0.436258		YNL208W	3.91657	0	0		YNL208W	3.60396	0	0		YNL208W	0.159134	0.077926	0.418597		YNL208W	-0.153477	0.121008	0.38875
YNR051C	-0.1722	0.223584	0.982177		YNR051C	-0.777795	3.68962e-15	9.00921e-15		YNR051C	-0.605595	2.16745e-09	4.4669e-09		YNR051C	-0.0320713	0.768115	0.947275		YNR051C	0.140129	0.121462	0.389901
YMR124W	-0.00362618	0.978139	0.9991		YMR124W	0.00807176	0.929841	0.936965		YMR124W	0.0116979	0.902437	0.913007		YMR124W	0.127278	0.211122	0.626282		YMR124W	0.130904	0.121637	0.389984
YNL219C	0.108611	0.377275	0.999031		YNL219C	0.0778981	0.36393	0.39373		YNL219C	-0.0307133	0.727525	0.751551		YNL219C	-0.0123965	0.89616	0.972861		YNL219C	-0.121008	0.12161	0.389984
YHR197W	-0.122131	0.307048	0.999031		YHR197W	-0.579223	6.31896e-12	1.35788e-11		YHR197W	-0.457092	7.06032e-08	1.33829e-07		YHR197W	-0.240761	0.00868384	0.140309		YHR197W	-0.11863	0.121827	0.390355
YDL208W	0.0865746	0.40354	0.999031		YDL208W	0.843936	5.3189e-31	2.04386e-30		YDL208W	0.757361	8.76675e-25	3.23553e-24		YDL208W	-0.0233333	0.757008	0.940303		YDL208W	-0.109908	0.122132	0.390622
YOR189W	0.473849	0.0503351	0.699192		YOR189W	3.73145	3.02422e-109	4.49901e-108		YOR189W	3.2576	6.11379e-78	7.54382e-77		YOR189W	0.187723	0.228755	#N/A		YOR189W	-0.286126	0.122328	0.390622
YGR032W	-0.00635067	0.985763	0.9991		YGR032W	-1.7456	2.93667e-12	6.41303e-12		YGR032W	-1.73924	6.49583e-12	1.51456e-11		YGR032W	0.372797	0.148053	0.539647		YGR032W	0.379147	0.122359	0.390622
YLR433C	-0.0723597	0.656157	0.999031		YLR433C	0.514271	6.68657e-06	1.08087e-05		YLR433C	0.58663	3.92103e-07	7.13779e-07		YLR433C	-0.229685	0.0698346	0.393683		YLR433C	-0.157326	0.122248	0.390622
YMR270C	-0.0497395	0.815954	0.999031		YMR270C	-1.02924	1.21055e-12	2.69026e-12		YMR270C	-0.979497	4.51576e-10	9.62886e-10		YMR270C	0.121996	0.50387	0.833174		YMR270C	0.171735	0.122356	0.390622
YKL014C	-0.246339	0.0291905	0.520505		YKL014C	-0.428964	6.05491e-08	1.09192e-07		YKL014C	-0.182624	0.0233733	0.0297278		YKL014C	-0.134467	0.120935	0.498812		YKL014C	0.111872	0.122252	0.390622
YOR317W	-0.00894886	0.94623	0.999031		YOR317W	0.0117333	0.899913	0.909341		YOR317W	0.0206822	0.826501	0.845005		YOR317W	0.132234	0.16918	0.566621		YOR317W	0.141183	0.122464	0.390718
YGL094C	-0.00547336	0.974054	0.999031		YGL094C	-2.18418	1.62666e-81	1.69919e-80		YGL094C	-2.17871	1.47786e-69	1.58084e-68		YGL094C	0.12399	0.395361	0.785364		YGL094C	0.129464	0.122775	0.390755
YGR270W	-0.029269	0.811929	0.999031		YGR270W	-1.13178	2.57704e-40	1.24485e-39		YGR270W	-1.10251	2.06773e-35	1.04502e-34		YGR270W	0.0860348	0.378661	0.774744		YGR270W	0.115304	0.12273	0.390755
YML051W	-0.235705	0.278488	0.999031		YML051W	-3.7367	4.07703e-128	7.5621e-127		YML051W	-3.50099	8.57349e-117	1.68758e-115		YML051W	-0.368767	0.0647849	0.382519		YML051W	-0.133063	0.122659	0.390755
YJL156C	0.0647936	0.672819	0.999031		YJL156C	-0.288549	0.00584229	0.00770671		YJL156C	-0.353343	0.00163447	0.00233202		YJL156C	0.205034	0.0972534	0.464642		YJL156C	0.14024	0.122723	0.390755
YPL043W	-0.00206581	0.985677	0.9991		YPL043W	1.39001	4.71614e-66	3.75927e-65		YPL043W	1.39207	5.34309e-65	5.23189e-64		YPL043W	-0.12447	0.135313	0.520639		YPL043W	-0.122404	0.122917	0.390829
YKR037C	-0.300091	0.149872	0.941618		YKR037C	0.328816	0.0226321	0.0282267		YKR037C	0.628906	2.89964e-05	4.72151e-05		YKR037C	-0.105362	0.525127	#N/A		YKR037C	0.194728	0.122974	0.390829
YER144C	-7.56864e-05	0.999672	0.999711		YER144C	-2.28618	4.2643e-75	3.97705e-74		YER144C	-2.2861	4.2761e-64	4.1243e-63		YER144C	0.141532	0.374573	0.771324		YER144C	0.141608	0.123022	0.390829
YBR101C	-0.000564928	0.996671	0.999505		YBR101C	0.664006	2.4748e-12	5.41461e-12		YBR101C	0.664571	6.17728e-12	1.44145e-11		YBR101C	0.141868	0.151487	0.546312		YBR101C	0.142433	0.123363	0.391673
YDR003W	0.114674	0.62052	#N/A		YDR003W	1.00171	5.67744e-10	1.12403e-09		YDR003W	0.887034	9.00225e-08	1.69528e-07		YDR003W	-0.109602	0.542622	#N/A		YDR003W	-0.224276	0.123823	0.392658
YDR368W	0.114306	0.340832	0.999031		YDR368W	1.81819	9.57679e-104	1.33867e-102		YDR368W	1.70388	4.4497e-88	6.31138e-87		YDR368W	-0.0132715	0.878452	0.965239		YDR368W	-0.127578	0.123751	0.392658
YPR143W	0.0919982	0.626538	0.999031		YPR143W	3.55836	6.11813e-159	1.43925e-157		YPR143W	3.46637	1.25851e-145	3.16653e-144		YPR143W	-0.125193	0.319188	0.731133		YPR143W	-0.217191	0.124112	0.393334
YPL061W	0.00258656	0.98414	0.9991		YPL061W	0.981212	1.45504e-26	4.99721e-26		YPL061W	0.978625	2.06507e-26	8.0044e-26		YPL061W	-0.138621	0.132508	0.519403		YPL061W	-0.141208	0.124253	0.393535
YCR077C	-0.0421996	0.677586	0.999031		YCR077C	0.0185893	0.79422	0.813622		YCR077C	0.0607889	0.400276	0.434923		YCR077C	0.0640427	0.388837	0.781133		YCR077C	0.106242	0.124326	0.393535
YOR034C	0.0139112	0.938288	0.999031		YOR034C	-1.45184	4.47594e-31	1.72567e-30		YOR034C	-1.46575	5.50807e-30	2.37697e-29		YOR034C	-0.132281	0.385183	0.778714		YOR034C	-0.146192	0.125	0.395378
YKL174C	0.154365	0.352965	0.999031		YKL174C	-0.225679	0.0502193	0.0607101		YKL174C	-0.380044	0.00150251	0.00215064		YKL174C	0.00197722	0.988159	0.995933		YKL174C	-0.152388	0.125059	0.395378
YDL072C	0.294615	0.0156336	0.388281		YDL072C	1.47102	1.37601e-67	1.12471e-66		YDL072C	1.1764	4.49269e-41	2.64758e-40		YDL072C	0.168814	0.0610187	0.373762		YDL072C	-0.1258	0.125242	0.395445
YOR023C	-0.164285	0.293575	0.999031		YOR023C	-1.40846	2.12829e-38	9.90863e-38		YOR023C	-1.24417	1.92507e-28	7.98593e-28		YOR023C	-0.0219541	0.861528	0.963777		YOR023C	0.142331	0.125371	0.395445
YGR125W	-0.0960189	0.432901	0.999031		YGR125W	-0.555012	6.77544e-11	1.40284e-10		YGR125W	-0.458993	1.8726e-07	3.47889e-07		YGR125W	0.0202816	0.83282	0.961997		YGR125W	0.1163	0.125383	0.395445
YNL284C-A	-0.0551742	0.625101	0.999031		YNL284C-A	-0.548965	5.70027e-12	1.22767e-11		YNL284C-A	-0.493791	6.64481e-10	1.40547e-09		YNL284C-A	-0.174266	0.0334155	0.278734		YNL284C-A	-0.119092	0.125354	0.395445
YNL257C	0.384542	0.0247338	0.475826		YNL257C	-1.60982	5.14785e-47	2.89792e-46		YNL257C	-1.99436	2.45639e-53	1.93403e-52		YNL257C	0.516068	0.000495829	0.0216477		YNL257C	0.131527	0.125547	0.395723
YOR111W	0.358664	0.119233	#N/A		YOR111W	1.3796	3.17142e-18	8.62453e-18		YOR111W	1.02094	9.68798e-10	2.03279e-09		YOR111W	0.13293	0.452041	#N/A		YOR111W	-0.225734	0.125863	0.396348
YMR216C	-0.0990556	0.43542	0.999031		YMR216C	-0.317099	0.00031692	0.000463018		YMR216C	-0.218044	0.0171944	0.0222107		YMR216C	0.0206703	0.836322	0.961997		YMR216C	0.119726	0.125897	0.396348
YKR059W	-0.0149833	0.864053	0.999031		YKR059W	0.319282	2.43983e-07	4.28117e-07		YKR059W	0.334265	6.69221e-08	1.27101e-07		YKR059W	-0.10918	0.0789216	0.419669		YKR059W	-0.0941965	0.126321	0.397445
YNL238W	-0.0277363	0.829165	0.999031		YNL238W	-1.27501	1.55676e-45	8.47504e-45		YNL238W	-1.24727	4.3748e-42	2.65935e-41		YNL238W	-0.14406	0.164329	0.5569		YNL238W	-0.116324	0.126407	0.397476
YLR168C	-0.0410563	0.817491	0.999031		YLR168C	0.845014	3.94908e-12	8.5625e-12		YLR168C	0.886071	8.38099e-12	1.93771e-11		YLR168C	0.130952	0.341592	0.749324		YLR168C	0.172008	0.126789	0.398438
YEL062W	0.0670379	0.739733	0.999031		YEL062W	-1.20977	4.94741e-19	1.37317e-18		YEL062W	-1.27681	1.23015e-17	3.58453e-17		YEL062W	0.227615	0.186262	0.596271		YEL062W	0.160577	0.126869	0.398449
YDR091C	-0.0286813	0.785754	0.999031		YDR091C	0.0340039	0.647623	0.674307		YDR091C	0.0626852	0.402139	0.436537		YDR091C	-0.138785	0.0712406	0.397954		YDR091C	-0.110104	0.127299	0.398963
YDR324C	0.0397429	0.730499	0.999031		YDR324C	0.422366	1.91004e-07	3.36789e-07		YDR324C	0.382623	3.12374e-06	5.40582e-06		YDR324C	-0.0787558	0.355543	0.756255		YDR324C	-0.118499	0.127491	0.398963
YLR216C	0.000159675	0.99875	0.999505		YLR216C	1.244	1.93974e-67	1.5788e-66		YLR216C	1.24384	4.11716e-66	4.12214e-65		YLR216C	0.108535	0.137125	0.521355		YLR216C	0.108375	0.127434	0.398963
YPL048W	-0.0463403	0.59062	0.999031		YPL048W	-0.0993627	0.101963	0.118605		YPL048W	-0.0530224	0.385266	0.4194		YPL048W	-0.136527	0.0293026	0.261505		YPL048W	-0.0901868	0.1272	0.398963
YML075C	-0.00594805	0.95236	0.999031		YML075C	-1.3649	1.37797e-84	1.50743e-83		YML075C	-1.35895	3.36224e-82	4.4423e-81		YML075C	-0.105978	0.156895	0.549402		YML075C	-0.10003	0.127468	0.398963
YEL061C	-0.308085	0.0703348	0.800084		YEL061C	-0.259921	0.0284471	0.0351834		YEL061C	0.0481641	0.693234	0.719983		YEL061C	-0.154351	0.260497	0.677653		YEL061C	0.153735	0.127277	0.398963
YDL174C	0.0186743	0.873974	0.999031		YDL174C	-0.456171	2.22623e-08	4.0899e-08		YDL174C	-0.474845	2.24332e-08	4.35787e-08		YDL174C	0.131682	0.149818	0.542792		YDL174C	0.113007	0.127596	0.399053
YBR207W	0.0296725	0.846179	0.999031		YBR207W	0.289215	0.00590705	0.00778504		YBR207W	0.259542	0.0195579	0.0250846		YBR207W	0.1754	0.141612	0.531274		YBR207W	0.145727	0.127733	0.399243
YGR021W	0.0605556	0.762473	0.999031		YGR021W	0.113241	0.406907	0.437283		YGR021W	0.0526855	0.719362	0.744713		YGR021W	0.246509	0.120652	0.498812		YGR021W	0.185953	0.127881	0.399466
YGL150C	-0.222391	0.0823997	0.838129		YGL150C	-1.51999	1.25037e-64	9.75184e-64		YGL150C	-1.2976	1.24521e-45	8.16085e-45		YGL150C	-0.103907	0.306716	0.718881		YGL150C	0.118483	0.127978	0.39953
YGL008C	-0.00495178	0.953715	0.999031		YGL008C	-0.147067	0.0147527	0.0186855		YGL008C	-0.142115	0.0185067	0.0238049		YGL008C	-0.0965691	0.110122	0.487528		YGL008C	-0.0916174	0.128076	0.399598
YOR254C	-0.0539583	0.595959	0.999031		YOR254C	0.22562	0.00165506	0.00228533		YOR254C	0.279578	0.000107871	0.000168762		YOR254C	-0.159135	0.0330811	0.277884		YOR254C	-0.105177	0.128197	0.399737
YDR311W	-0.232544	0.116662	0.894614		YDR311W	0.397114	0.000121641	0.000182225		YDR311W	0.629658	3.10173e-09	6.35387e-09		YDR311W	-0.0873394	0.441073	0.806669		YDR311W	0.145205	0.128289	0.399785
YHL021C	0.102703	0.754784	0.999031		YHL021C	0.562224	0.0150605	0.0190545		YHL021C	0.459521	0.0493021	0.06064		YHL021C	0.451688	0.0549394	0.356134		YHL021C	0.348984	0.128614	0.400557
YFL013C	0.0381219	0.771258	0.999031		YFL013C	0.502185	2.73384e-08	5.00181e-08		YFL013C	0.464063	1.04072e-06	1.84972e-06		YFL013C	0.165395	0.101087	0.470365		YFL013C	0.127273	0.128696	0.400574
YNL039W	-0.0200447	0.891224	0.999031		YNL039W	0.0660089	0.513152	0.543486		YNL039W	0.0860536	0.418106	0.452342		YNL039W	0.117425	0.307963	0.720982		YNL039W	0.137469	0.129402	0.402533
YDL063C	-0.219063	0.0879315	0.838129		YDL063C	-0.100999	0.265916	0.293283		YDL063C	0.118064	0.193351	0.221087		YDL063C	-0.344553	0.000440446	0.0201007		YDL063C	-0.12549	0.13001	0.403009
YOL032W	0.229189	0.216664	0.982177		YOL032W	0.768081	8.60381e-10	1.68895e-09		YOL032W	0.538892	8.23624e-05	0.000129731		YOL032W	0.405133	0.00510066	0.0987622		YOL032W	0.175944	0.129785	0.403009
YML035C	-0.00396771	0.97283	0.999031		YML035C	-0.319837	9.3512e-05	0.000140852		YML035C	-0.315869	0.000138308	0.000214294		YML035C	-0.119576	0.174104	0.573857		YML035C	-0.115608	0.130018	0.403009
YMR066W	-0.259241	0.277547	#N/A		YMR066W	-0.479471	0.00357767	0.00480482		YMR066W	-0.220231	0.202875	0.230747		YMR066W	-0.0587341	0.767484	#N/A		YMR066W	0.200507	0.130009	0.403009
YNL084C	-0.0830798	0.472473	0.999031		YNL084C	0.656914	3.5049e-16	8.88818e-16		YNL084C	0.739994	4.65892e-19	1.43563e-18		YNL084C	0.0327908	0.705301	0.917278		YNL084C	0.115871	0.129892	0.403009
YHR152W	-0.0751448	0.627591	0.999031		YHR152W	1.05717	6.13521e-23	1.90168e-22		YHR152W	1.13231	4.17718e-24	1.50801e-23		YHR152W	0.0799887	0.49117	0.825885		YHR152W	0.155133	0.129937	0.403009
YEL068C	0.079836	0.777309	#N/A		YEL068C	0.84223	2.05584e-05	3.23291e-05		YEL068C	0.762394	0.000153643	0.000236723		YEL068C	-0.182675	0.412093	#N/A		YEL068C	-0.262511	0.13012	0.403087
YJL147C	-0.126846	0.653248	#N/A		YJL147C	-0.717838	0.000177506	0.000263121		YJL147C	-0.590992	0.00439853	0.00601188		YJL147C	0.0978036	0.68375	#N/A		YJL147C	0.224649	0.130523	0.404095
YBR143C	0.0522526	0.585902	0.999031		YBR143C	0.815545	1.55942e-33	6.36864e-33		YBR143C	0.763293	3.46238e-29	1.45616e-28		YBR143C	-0.0481072	0.487037	0.825885		YBR143C	-0.10036	0.130658	0.404274
YGR163W	-0.346905	0.040815	0.633632		YGR163W	0.396996	0.000791604	0.00111787		YGR163W	0.743901	9.28324e-10	1.95211e-09		YGR163W	-0.186938	0.158095	0.55125		YGR163W	0.159966	0.131075	0.405324
YGL253W	-0.0350815	0.692029	0.999031		YGL253W	-0.308175	8.46001e-07	1.44274e-06		YGL253W	-0.273093	1.31547e-05	2.19701e-05		YGL253W	-0.128774	0.0414249	0.307428		YGL253W	-0.0936929	0.131358	0.405934
YGR109W-B	-0.0438706	0.901763	0.999031		YGR109W-B	-4.10594	1.06435e-67	8.72435e-67		YGR109W-B	-4.06207	8.40761e-53	6.50466e-52		YGR109W-B	0.128602	0.702352	0.915646		YGR109W-B	0.172472	0.131428	0.405934
YML126C	-0.0735238	0.462878	0.999031		YML126C	0.507836	7.14279e-13	1.60588e-12		YML126C	0.58136	2.35244e-16	6.53871e-16		YML126C	-0.179295	0.0120756	0.173281		YML126C	-0.105772	0.131866	0.407046
YDR075W	0.193111	0.352065	0.999031		YDR075W	0.488759	0.000668939	0.000949975		YDR075W	0.295648	0.048333	0.0594986		YDR075W	0.00370489	0.982095	#N/A		YDR075W	-0.189406	0.131963	0.407106
YBR082C	0.160464	0.0767304	0.822905		YBR082C	0.776787	4.97395e-34	2.06932e-33		YBR082C	0.616323	9.75585e-22	3.28239e-21		YBR082C	0.065583	0.314141	0.726592		YBR082C	-0.094881	0.132282	0.40785
YPR003C	-0.105122	0.548746	0.999031		YPR003C	-1.10732	2.83797e-19	7.93397e-19		YPR003C	-1.0022	8.46426e-16	2.31487e-15		YPR003C	-0.250392	0.0870461	0.442573		YPR003C	-0.14527	0.132411	0.408007
YPL190C	-0.0390789	0.722017	0.999031		YPL190C	-0.0627835	0.415136	0.445547		YPL190C	-0.0237046	0.762068	0.784434		YPL190C	0.0727574	0.368163	0.764889		YPL190C	0.111836	0.132581	0.40829
YOL060C	-0.292674	0.0310212	0.542367		YOL060C	-1.50245	3.17349e-56	2.13795e-55		YOL060C	-1.20977	7.69131e-36	3.94589e-35		YOL060C	-0.17205	0.115911	0.49512		YOL060C	0.120625	0.13275	0.40857
YNL253W	-0.170316	0.39201	0.999031		YNL253W	0.0407641	0.766084	0.787308		YNL253W	0.21108	0.143455	0.167037		YNL253W	0.00821387	0.958959	0.989085		YNL253W	0.17853	0.132858	0.408661
YPL126W	-0.120961	0.275481	0.999031		YPL126W	-1.00405	1.12642e-37	5.15302e-37		YPL126W	-0.883094	2.73541e-29	1.15884e-28		YPL126W	-0.231311	0.00538055	0.10223		YPL126W	-0.110351	0.13305	0.409012
YOR032C	-0.371687	0.340736	#N/A		YOR032C	-0.955333	0.000771783	0.00109174		YOR032C	-0.583646	0.0290526	0.0365732		YOR032C	-0.693136	0.033534	#N/A		YOR032C	-0.321449	0.13341	0.40944
YOR386W	-0.0993093	0.691328	#N/A		YOR386W	-0.163428	0.337025	0.366223		YOR386W	-0.0641185	0.726416	0.750674		YOR386W	0.115126	0.574974	#N/A		YOR386W	0.214436	0.133312	0.40944
YPL167C	-0.2377	0.594654	#N/A		YPL167C	-3.20823	3.53529e-26	1.19782e-25		YPL167C	-2.97053	1.39433e-19	4.38056e-19		YPL167C	-0.0140296	0.973423	#N/A		YPL167C	0.22367	0.133503	0.40944
YHR040W	0.0958196	0.641795	0.999031		YHR040W	1.10555	1.47083e-14	3.52305e-14		YHR040W	1.00973	7.64016e-12	1.77067e-11		YHR040W	-0.102509	0.516405	#N/A		YHR040W	-0.198329	0.133496	0.40944
YGR264C	-0.131175	0.176703	0.968973		YGR264C	-0.488837	1.01933e-12	2.27403e-12		YGR264C	-0.357662	1.95475e-07	3.62685e-07		YGR264C	-0.231395	0.00102046	0.035193		YGR264C	-0.10022	0.133666	0.409699
YDR349C	-0.126857	0.352211	0.999031		YDR349C	-2.06673	9.76432e-103	1.34538e-101		YDR349C	-1.93987	2.57787e-89	3.70177e-88		YDR349C	-0.242753	0.0306635	0.267556		YDR349C	-0.115896	0.133947	0.41008
YOL123W	0.13548	0.143302	0.927907		YOL123W	0.876449	2.57521e-41	1.28141e-40		YOL123W	0.740969	2.07392e-29	8.82485e-29		YOL123W	0.0398314	0.552504	0.851141		YOL123W	-0.095649	0.133896	0.41008
YDR175C	-0.085545	0.583778	0.999031		YDR175C	1.93099	5.09671e-72	4.47567e-71		YDR175C	2.01653	4.77718e-71	5.21614e-70		YDR175C	0.0753999	0.505304	0.833174		YDR175C	0.160945	0.134561	0.411719
YDR078C	-0.273794	0.562909	#N/A		YDR078C	-1.40811	4.55488e-05	7.00295e-05		YDR078C	-1.13432	0.000455861	0.000677065		YDR078C	-0.608487	0.144493	#N/A		YDR078C	-0.334693	0.134842	0.412095
YLR315W	0.390228	0.287918	#N/A		YLR315W	1.90467	8.31375e-14	1.93064e-13		YLR315W	1.51444	9.77432e-09	1.94512e-08		YLR315W	0.0263998	0.923529	#N/A		YLR315W	-0.363828	0.134821	0.412095
YJR090C	-0.161605	0.23884	0.982177		YJR090C	-1.46228	2.69659e-53	1.72815e-52		YJR090C	-1.30068	1.50154e-39	8.51071e-39		YJR090C	-0.0459402	0.684911	0.908424		YJR090C	0.115664	0.135545	0.414002
YKL068W-A	0.539932	0.0542343	#N/A		YKL068W-A	2.19422	5.01715e-30	1.88412e-29		YKL068W-A	1.65429	4.73097e-16	1.30434e-15		YKL068W-A	0.256338	0.214002	#N/A		YKL068W-A	-0.283594	0.135655	0.414095
YBR037C	0.113769	0.542683	0.999031		YBR037C	0.107431	0.400359	0.430566		YBR037C	-0.00633795	0.962942	0.967287		YBR037C	0.287227	0.0496331	0.339381		YBR037C	0.173458	0.135749	0.41414
YLR120C	0.136775	0.231841	0.982177		YLR120C	-0.196914	0.0125721	0.0160112		YLR120C	-0.333689	5.61034e-05	8.95643e-05		YLR120C	0.245002	0.00559876	0.104919		YLR120C	0.108227	0.13583	0.414146
YOL130W	0.0406019	0.729745	0.999031		YOL130W	-0.981354	7.01048e-33	2.8193e-32		YOL130W	-1.02196	4.99932e-34	2.43451e-33		YOL130W	-0.0677532	0.463097	0.81744		YOL130W	-0.108355	0.136153	0.414572
YOL088C	0.0363739	0.806418	0.999031		YOL088C	0.683764	4.19927e-11	8.76033e-11		YOL088C	0.64739	1.10873e-09	2.31715e-09		YOL088C	-0.103908	0.365227	0.760859		YOL088C	-0.140282	0.136207	0.414572
YNL066W	-0.0405911	0.687089	0.999031		YNL066W	0.0488156	0.492195	0.522726		YNL066W	0.0894067	0.210725	0.239064		YNL066W	-0.143726	0.0497572	0.339381		YNL066W	-0.103135	0.136116	0.414572
YBL051C	-0.138658	0.181855	0.971926		YBL051C	-0.959926	6.69321e-40	3.21441e-39		YBL051C	-0.821268	1.97307e-28	8.17919e-28		YBL051C	-0.040444	0.614166	0.882187		YBL051C	0.0982139	0.136478	0.415007
YNL131W	0.0853562	0.397309	0.999031		YNL131W	0.69154	1.42232e-22	4.38283e-22		YNL131W	0.606184	3.33231e-17	9.55603e-17		YNL131W	-0.0158728	0.831226	0.961997		YNL131W	-0.101229	0.136509	0.415007
YNR054C	0.148463	0.297569	0.999031		YNR054C	0.994406	1.92639e-23	6.06199e-23		YNR054C	0.845942	1.01057e-16	2.84307e-16		YNR054C	0.00676362	0.949148	0.985155		YNR054C	-0.1417	0.136713	0.415386
YDL090C	0.090222	0.636641	0.999031		YDL090C	-0.541725	4.34389e-05	6.69201e-05		YDL090C	-0.631947	4.3382e-06	7.46068e-06		YDL090C	-0.0682732	0.66668	0.904252		YDL090C	-0.158495	0.13681	0.415439
YBR137W	0.0955888	0.54538	0.999031		YBR137W	2.1947	3.35652e-88	3.90044e-87		YBR137W	2.09912	1.25048e-76	1.49824e-75		YBR137W	-0.0676464	0.552054	0.8511		YBR137W	-0.163235	0.136986	0.415731
YDR496C	-0.0281635	0.799718	0.999031		YDR496C	0.725835	1.73916e-20	5.06263e-20		YDR496C	0.753998	1.01873e-21	3.42555e-21		YDR496C	-0.141578	0.0790105	0.419669		YDR496C	-0.113414	0.137284	0.416394
YCL036W	0.157929	0.379721	0.999031		YCL036W	-0.0682618	0.584651	0.61382		YCL036W	-0.226191	0.0803207	0.0962153		YCL036W	-0.00425321	0.976225	0.993165		YCL036W	-0.162183	0.138017	0.418373
YLR291C	0.105967	0.349582	0.999031		YLR291C	-0.331561	2.80099e-05	4.36673e-05		YLR291C	-0.437528	6.72851e-08	1.27707e-07		YLR291C	-0.00169054	0.984486	0.994784		YLR291C	-0.107658	0.138273	0.418906
YBR236C	-0.101354	0.54294	0.999031		YBR236C	2.27137	4.90229e-88	5.67391e-87		YBR236C	2.37272	3.40049e-85	4.65216e-84		YBR236C	0.0720103	0.543589	0.848088		YBR236C	0.173364	0.138557	0.419523
YKL005C	-0.157804	0.452922	0.999031		YKL005C	0.824575	1.15623e-08	2.15078e-08		YKL005C	0.982379	1.25385e-10	2.75163e-10		YKL005C	0.0397148	0.806947	#N/A		YKL005C	0.197519	0.138659	0.41959
YLR006C	0.0188144	0.911028	0.999031		YLR006C	-1.44198	1.71225e-36	7.58132e-36		YLR006C	-1.46079	3.27038e-32	1.50085e-31		YLR006C	0.149902	0.295226	0.711981		YLR006C	0.131087	0.138756	0.419639
YNL275W	0.223309	0.318879	0.999031		YNL275W	-1.18253	1.27579e-14	3.06475e-14		YNL275W	-1.40583	7.26599e-18	2.14313e-17		YNL275W	0.0519167	0.786572	0.953406		YNL275W	-0.171392	0.139103	0.420278
YHR081W	0.308096	0.0954023	0.857462		YHR081W	1.17331	6.08029e-20	1.7445e-19		YHR081W	0.865212	7.54419e-11	1.67401e-10		YHR081W	0.12779	0.35733	0.756255		YHR081W	-0.180305	0.139127	0.420278
YER019W	0.0607443	0.643217	0.999031		YER019W	-0.237546	0.00940401	0.0121394		YER019W	-0.29829	0.00150227	0.00215064		YER019W	-0.0586996	0.569791	0.857652		YER019W	-0.119444	0.139398	0.420851
YNR031C	-0.178224	0.216721	0.982177		YNR031C	-1.21213	1.41055e-33	5.76472e-33		YNR031C	-1.0339	1.93968e-23	6.86121e-23		YNR031C	-0.0518763	0.655279	0.900048		YNR031C	0.126347	0.139554	0.421079
YKL016C	0.0742038	0.475439	0.999031		YKL016C	1.09779	1.84567e-51	1.14479e-50		YKL016C	1.02358	3.4889e-43	2.17567e-42		YKL016C	0.1796	0.017499	0.202946		YKL016C	0.105396	0.139891	0.421854
YBL078C	-0.310282	0.292807	#N/A		YBL078C	2.18391	1.1305e-27	3.99647e-27		YBL078C	2.49419	1.02817e-30	4.51786e-30		YBL078C	-0.00432494	0.983536	#N/A		YBL078C	0.305957	0.140415	0.422459
YNR006W	0.0165122	0.89098	0.999031		YNR006W	-0.0388697	0.640757	0.668119		YNR006W	-0.0553819	0.524561	0.557201		YNR006W	0.128525	0.169268	0.566621		YNR006W	0.112012	0.140325	0.422459
YKR043C	0.0475313	0.656031	0.999031		YKR043C	0.705798	5.3808e-21	1.59196e-20		YKR043C	0.658267	3.98606e-18	1.18598e-17		YKR043C	-0.0600114	0.441054	0.806669		YKR043C	-0.107543	0.140387	0.422459
YIL019W	-0.0590945	0.729677	0.999031		YIL019W	2.39244	1.40807e-88	1.6495e-87		YIL019W	2.45153	6.70504e-90	9.67633e-89		YIL019W	-0.237345	0.0497825	0.339381		YIL019W	-0.17825	0.140279	0.422459
YKL170W	0.33874	0.133021	0.916564		YKL170W	4.07795	3.03769e-149	6.60868e-148		YKL170W	3.73921	9.9752e-118	1.98373e-116		YKL170W	0.0756315	0.58291	0.865677		YKL170W	-0.263109	0.14055	0.422621
YDR343C	-0.0523531	0.868483	0.999031		YDR343C	1.55606	3.20019e-12	6.98058e-12		YDR343C	1.60842	6.68766e-13	1.62339e-12		YDR343C	0.27651	0.216896	0.633928		YDR343C	0.328862	0.140653	0.422678
YPL226W	0.00209491	0.981864	0.9991		YPL226W	-0.104069	0.10929	0.126797		YPL226W	-0.106164	0.104207	0.123196		YPL226W	-0.0914236	0.17111	0.569144		YPL226W	-0.0935186	0.140731	0.422678
YPR117W	-0.175238	0.618868	0.999031		YPR117W	-4.66498	1.27505e-84	1.39748e-83		YPR117W	-4.48974	1.41577e-67	1.45267e-66		YPR117W	-0.0327867	0.922887	0.978689		YPR117W	0.142451	0.141053	0.423296
YNR037C	0.49119	0.0225525	0.453092		YNR037C	3.22826	7.38686e-105	1.04009e-103		YNR037C	2.73707	6.52053e-69	6.88582e-68		YNR037C	0.257833	0.076817	0.415808		YNR037C	-0.233357	0.141099	0.423296
YJL111W	0.0113021	0.906598	0.999031		YJL111W	0.264931	9.21581e-05	0.000138957		YJL111W	0.253629	0.000212185	0.000323476		YJL111W	-0.0843247	0.235026	0.64945		YJL111W	-0.0956268	0.141772	0.42493
YHR129C	0.56734	0.0481801	#N/A		YHR129C	-0.865038	5.15726e-06	8.41892e-06		YHR129C	-1.43238	2.99595e-11	6.75402e-11		YHR129C	0.359265	0.150352	#N/A		YHR129C	-0.208074	0.141806	0.42493
YHR123W	0.154189	0.254116	0.988846		YHR123W	-0.42251	6.39899e-06	1.03757e-05		YHR123W	-0.576699	3.37448e-09	6.90284e-09		YHR123W	0.0354787	0.74337	0.933871		YHR123W	-0.11871	0.14203	0.425359
YDR186C	-0.0576304	0.663699	0.999031		YDR186C	-1.14531	1.25784e-35	5.44844e-35		YDR186C	-1.08768	4.58138e-30	1.98002e-29		YDR186C	0.0613241	0.558708	0.852234		YDR186C	0.118954	0.142197	0.425371
YPR051W	0.372437	0.0591037	0.748961		YPR051W	2.13417	3.4128e-55	2.2623e-54		YPR051W	1.76174	4.64915e-35	2.32137e-34		YPR051W	0.174311	0.225861	0.642334		YPR051W	-0.198126	0.142179	0.425371
YGL071W	-0.0230975	0.889185	0.999031		YGL071W	-1.86376	1.28757e-59	9.21031e-59		YGL071W	-1.84066	3.54616e-53	2.77694e-52		YGL071W	0.121781	0.360331	0.757326		YGL071W	0.144878	0.142413	0.425773
YGL107C	-0.100005	0.472343	0.999031		YGL107C	0.0193103	0.841404	0.85635		YGL107C	0.119315	0.233983	0.264053		YGL107C	0.0278693	0.796894	0.955932		YGL107C	0.127874	0.143412	0.42778
YGR274C	-0.137399	0.3593	0.999031		YGR274C	-0.582452	1.96206e-08	3.61606e-08		YGR274C	-0.445054	3.89813e-05	6.29773e-05		YGR274C	-0.00777936	0.948712	0.985155		YGR274C	0.129619	0.143193	0.42778
YLR014C	0.159621	0.542158	#N/A		YLR014C	-1.06997	3.14688e-09	6.01023e-09		YLR014C	-1.22959	8.86332e-11	1.96145e-10		YLR014C	-0.0364157	0.87143	#N/A		YLR014C	-0.196037	0.143355	0.42778
YMR292W	-0.0434577	0.795964	0.999031		YMR292W	0.0811037	0.491594	0.522183		YMR292W	0.124561	0.298274	0.330229		YMR292W	-0.19431	0.143262	0.533472		YMR292W	-0.150853	0.143322	0.42778
YLR048W	-0.0484422	0.593652	0.999031		YLR048W	-0.159547	0.0129117	0.0164219		YLR048W	-0.111105	0.0836469	0.0999927		YLR048W	-0.14182	0.027914	0.257436		YLR048W	-0.0933777	0.143862	0.428633
YKR026C	-0.062421	0.63404	0.999031		YKR026C	0.742714	7.70087e-16	1.92755e-15		YKR026C	0.805135	6.02256e-18	1.78092e-17		YKR026C	-0.189014	0.0548826	0.356134		YKR026C	-0.126593	0.143804	0.428633
YLR221C	0.0619891	0.740547	0.999031		YLR221C	2.00026	2.67038e-52	1.68522e-51		YLR221C	1.93827	6.73764e-48	4.66396e-47		YLR221C	-0.127653	0.343656	0.750057		YLR221C	-0.189642	0.14432	0.429117
YPL022W	-0.325731	0.0722236	0.809403		YPL022W	-2.04458	1.33876e-58	9.45961e-58		YPL022W	-1.71885	3.55178e-40	2.04113e-39		YPL022W	-0.192532	0.218693	0.635634		YPL022W	0.133198	0.144435	0.429117
YPR159W	0.107091	0.253436	0.987065		YPR159W	-0.482142	1.67302e-13	3.83741e-13		YPR159W	-0.589233	1.8206e-18	5.4874e-18		YPR159W	0.197605	0.00496118	0.0979105		YPR159W	0.0905147	0.144417	0.429117
YNL119W	-0.0993437	0.514372	0.999031		YNL119W	-0.759205	1.36304e-12	3.01987e-12		YNL119W	-0.659862	1.12717e-09	2.35484e-09		YNL119W	-0.229169	0.0639724	0.380885		YNL119W	-0.129825	0.144283	0.429117
YIL015W	0.11919	0.233085	0.982177		YIL015W	0.245845	0.000455091	0.000655943		YIL015W	0.126655	0.0753808	0.0906167		YIL015W	0.0210297	0.776161	0.948977		YIL015W	-0.0981605	0.144281	0.429117
YJR121W	0.0523429	0.620609	0.999031		YJR121W	-0.813578	1.08253e-27	3.82922e-27		YJR121W	-0.865921	7.04702e-31	3.10595e-30		YJR121W	0.160016	0.0344141	0.281364		YJR121W	0.107673	0.145037	0.430418
YJR140C	-0.1539	0.334591	0.999031		YJR140C	-1.02396	1.66595e-20	4.85197e-20		YJR140C	-0.870059	4.25e-14	1.08299e-13		YJR140C	-0.0216719	0.86878	0.964392		YJR140C	0.132228	0.144993	0.430418
YDR117C	-0.153934	0.241536	0.982177		YDR117C	0.0771887	0.398414	0.428793		YDR117C	0.231123	0.0144032	0.0187265		YDR117C	-0.0333119	0.744175	0.933871		YDR117C	0.120622	0.145158	0.430531
YNL078W	0.0957766	0.565491	0.999031		YNL078W	-0.159243	0.166083	0.189049		YNL078W	-0.25502	0.0345108	0.0431627		YNL078W	0.250525	0.050952	0.345061		YNL078W	0.154748	0.145455	0.431168
YDL027C	-0.231912	0.332747	0.999031		YDL027C	-0.584006	0.000399654	0.00057994		YDL027C	-0.352095	0.0424671	0.0525571		YDL027C	-0.0385804	0.846404	#N/A		YDL027C	0.193331	0.145715	0.431448
YGL254W	-0.121296	0.516012	0.999031		YGL254W	0.224738	0.0806736	0.0951025		YGL254W	0.346034	0.010578	0.0139251		YGL254W	0.0455174	0.757484	0.940363		YGL254W	0.166813	0.145713	0.431448
YNL003C	-0.117053	0.542403	0.999031		YNL003C	-0.574136	2.26764e-05	3.55566e-05		YNL003C	-0.457083	0.000792511	0.00115698		YNL003C	-0.279709	0.0733665	0.404699		YNL003C	-0.162657	0.145993	0.432026
YPL243W	-0.158753	0.123715	0.90493		YPL243W	0.226687	0.00169982	0.00234602		YPL243W	0.38544	1.63571e-07	3.04564e-07		YPL243W	-0.059443	0.441344	0.806805		YPL243W	0.09931	0.146357	0.432613
YJR072C	-0.0844738	0.466599	0.999031		YJR072C	0.630873	1.14931e-14	2.76436e-14		YJR072C	0.715347	3.87006e-18	1.15265e-17		YJR072C	-0.197769	0.0213434	0.22357		YJR072C	-0.113296	0.146275	0.432613
YDL025C	-0.0711353	0.737895	0.999031		YDL025C	0.723907	6.21783e-07	1.0671e-06		YDL025C	0.795042	3.02213e-07	5.54153e-07		YDL025C	0.121271	0.465554	#N/A		YDL025C	0.192407	0.146609	0.433115
YDR434W	0.0342583	0.791264	0.999031		YDR434W	-0.372574	3.81146e-05	5.89127e-05		YDR434W	-0.406832	1.11086e-05	1.86334e-05		YDR434W	-0.0821798	0.418375	0.79246		YDR434W	-0.116438	0.146838	0.433546
YDL123W	0.186067	0.477405	#N/A		YDL123W	0.856952	2.5888e-06	4.29143e-06		YDL123W	0.670884	0.000359805	0.000539848		YDL123W	-0.0516726	0.800254	#N/A		YDL123W	-0.23774	0.147027	0.433859
YLR025W	0.192568	0.241364	0.982177		YLR025W	3.5421	6.4486e-211	2.07323e-209		YLR025W	3.34953	7.5291e-177	2.51855e-175		YLR025W	0.0131042	0.903308	0.973475		YLR025W	-0.179464	0.147876	0.436117
YOL082W	0.125826	0.552623	0.999031		YOL082W	-0.739331	1.97473e-07	3.47984e-07		YOL082W	-0.865156	3.68141e-08	7.08255e-08		YOL082W	0.292631	0.0997301	0.469911		YOL082W	0.166806	0.147996	0.436225
YJL171C	0.120815	0.259786	0.992666		YJL171C	0.897687	6.2981e-33	2.53633e-32		YJL171C	0.776872	3.17591e-24	1.15301e-23		YJL171C	0.0162193	0.837583	0.961997		YJL171C	-0.104596	0.148218	0.436633
YKL197C	0.140544	0.434477	0.999031		YKL197C	-1.12159	1.364e-19	3.86176e-19		YKL197C	-1.26213	3.62254e-22	1.23825e-21		YKL197C	0.00235124	0.987683	0.995933		YKL197C	-0.138193	0.148348	0.436769
YNL320W	-0.252705	0.155138	0.946171		YNL320W	-0.50017	5.09783e-05	7.80248e-05		YNL320W	-0.247465	0.0529829	0.0649326		YNL320W	-0.103955	0.47314	0.818542		YNL320W	0.14875	0.148508	0.436995
YOR066W	0.0519766	0.704155	0.999031		YOR066W	-0.901877	7.16446e-22	2.16731e-21		YOR066W	-0.953853	1.05599e-21	3.5488e-21		YOR066W	0.168092	0.129213	0.514862		YOR066W	0.116116	0.14861	0.437048
YOR174W	-0.0324384	0.873975	0.999031		YOR174W	0.249054	0.0824327	0.0970576		YOR174W	0.281493	0.053547	0.0656101		YOR174W	-0.208219	0.205003	#N/A		YOR174W	-0.175781	0.148984	0.437901
YPL269W	-0.15434	0.658712	#N/A		YPL269W	-2.78387	4.68893e-32	1.85347e-31		YPL269W	-2.62953	1.74224e-24	6.38123e-24		YPL269W	0.0432918	0.892869	#N/A		YPL269W	0.197631	0.149127	0.438076
YPL011C	-0.290389	0.127555	0.910518		YPL011C	-0.0249433	0.850487	0.864269		YPL011C	0.265446	0.0529059	0.064852		YPL011C	-0.127708	0.405727	0.788676		YPL011C	0.162681	0.149228	0.438125
YML002W	0.0152668	0.978268	#N/A		YML002W	-2.96086	3.57519e-16	9.05453e-16		YML002W	-2.97612	3.11583e-12	7.36271e-12		YML002W	0.29022	0.581844	#N/A		YML002W	0.274953	0.149385	0.43834
YNL023C	-0.0160994	0.915461	0.999031		YNL023C	-0.322568	0.00241393	0.00328847		YNL023C	-0.306468	0.00460262	0.00628341		YNL023C	-0.151183	0.204629	0.623457		YNL023C	-0.135084	0.149781	0.439258
YKL027W	0.0676245	0.634041	0.999031		YKL027W	0.683314	5.01431e-12	1.08275e-11		YKL027W	0.615689	1.53071e-09	3.18184e-09		YKL027W	-0.0615076	0.576024	0.861151		YKL027W	-0.129132	0.150866	0.442191
YHR162W	0.227929	0.0650233	0.771169		YHR162W	1.58386	1.51356e-74	1.38591e-73		YHR162W	1.35593	1.40369e-53	1.10972e-52		YHR162W	0.105026	0.238271	0.652431		YHR162W	-0.122903	0.151114	0.442669
YGR106C	0.00530395	0.955887	0.999031		YGR106C	0.916235	4.19445e-42	2.11994e-41		YGR106C	0.910931	1.11925e-40	6.52278e-40		YGR106C	-0.0882689	0.209183	0.625008		YGR106C	-0.0935729	0.151354	0.442876
YPR134W	-0.192061	0.543252	#N/A		YPR134W	0.262058	0.223211	0.249347		YPR134W	0.454118	0.0496704	0.0610348		YPR134W	0.0748436	0.769479	#N/A		YPR134W	0.266904	0.151284	0.442876
YML048W	0.042261	0.686882	0.999031		YML048W	-0.31481	1.88497e-05	2.97392e-05		YML048W	-0.357071	1.74095e-06	3.05299e-06		YML048W	-0.0569249	0.470085	0.818542		YML048W	-0.0991859	0.151457	0.44293
YPR037C	0.308754	0.108823	0.884702		YPR037C	1.37929	3.73763e-25	1.23246e-24		YPR037C	1.07054	1.41032e-14	3.65986e-14		YPR037C	0.128168	0.378824	0.774744		YPR037C	-0.180586	0.151662	0.443279
YDR177W	-0.0379706	0.730531	0.999031		YDR177W	0.989063	2.36688e-37	1.07176e-36		YDR177W	1.02703	3.78971e-39	2.12305e-38		YDR177W	-0.144238	0.0769002	0.415808		YDR177W	-0.106267	0.152085	0.444268
YLR080W	0.235475	0.56527	#N/A		YLR080W	1.03832	0.000290518	0.00042552		YLR080W	0.802844	0.00606335	0.00816204		YLR080W	-0.127941	0.690466	#N/A		YLR080W	-0.363416	0.152348	0.44429
YPR026W	0.199335	0.523025	#N/A		YPR026W	-2.08345	8.45335e-25	2.76851e-24		YPR026W	-2.28279	6.81286e-22	2.30023e-21		YPR026W	0.391986	0.163914	#N/A		YPR026W	0.192651	0.152282	0.44429
YIL145C	0.0459548	0.754897	0.999031		YIL145C	0.180788	0.0792806	0.0935939		YIL145C	0.134833	0.199716	0.227511		YIL145C	-0.088728	0.433192	0.801903		YIL145C	-0.134683	0.152281	0.44429
YDR530C	0.287876	0.151864	0.942857		YDR530C	0.525269	0.000144979	0.000215957		YDR530C	0.237393	0.103387	0.122327		YDR530C	0.112865	0.478597	0.819083		YDR530C	-0.175011	0.152816	0.444417
YGR261C	-0.200522	0.0965473	0.865372		YGR261C	-0.523695	4.9632e-10	9.86334e-10		YGR261C	-0.323174	0.000184881	0.000283118		YGR261C	-0.0944998	0.321034	0.732654		YGR261C	0.106022	0.152488	0.444417
YLR224W	0.142909	0.57453	#N/A		YLR224W	-0.649991	0.000221029	0.000325718		YLR224W	-0.7929	1.62828e-05	2.70151e-05		YLR224W	-0.0505276	0.814735	#N/A		YLR224W	-0.193437	0.152783	0.444417
YPR030W	-1.10026	0.0161989	#N/A		YPR030W	-2.79911	3.37911e-16	8.58424e-16		YPR030W	-1.69885	2.02266e-08	3.93847e-08		YPR030W	-0.834647	0.0459522	#N/A		YPR030W	0.265611	0.15279	0.444417
YML104C	-0.297212	0.229341	0.982177		YML104C	-1.0316	1.67318e-09	3.23728e-09		YML104C	-0.734393	3.85403e-05	6.22822e-05		YML104C	-0.11329	0.5916	#N/A		YML104C	0.183922	0.152768	0.444417
YDR208W	0.00837969	0.940148	0.999031		YDR208W	-1.03119	1.45626e-40	7.05812e-40		YDR208W	-1.03957	3.52968e-38	1.91976e-37		YDR208W	0.106931	0.222991	0.639598		YDR208W	0.0985514	0.152986	0.444499
YHR117W	0.0295038	0.801839	0.999031		YHR117W	-0.661692	7.8212e-16	1.95598e-15		YHR117W	-0.691196	2.08378e-16	5.8031e-16		YHR117W	-0.0738589	0.425451	0.796919		YHR117W	-0.103363	0.153014	0.444499
YNR048W	0.0128019	0.952062	0.999031		YNR048W	-0.854846	3.10364e-09	5.93156e-09		YNR048W	-0.867648	3.04371e-08	5.88309e-08		YNR048W	0.178043	0.319247	0.731133		YNR048W	0.165241	0.153335	0.445182
YLL001W	0.0806754	0.512284	0.999031		YLL001W	0.693978	4.25201e-16	1.07311e-15		YLL001W	0.613302	4.77817e-12	1.12358e-11		YLL001W	0.196682	0.0332647	0.278041		YLL001W	0.116007	0.153979	0.446805
YDL119C	0.00350554	0.986648	0.9991		YDL119C	0.18117	0.202603	0.227662		YDL119C	0.177664	0.248069	0.278428		YDL119C	0.17925	0.289774	#N/A		YDL119C	0.175744	0.154089	0.446874
YDR421W	-0.0405694	0.850243	0.999031		YDR421W	-0.918572	3.50566e-10	7.01011e-10		YDR421W	-0.878003	2.37317e-08	4.60549e-08		YDR421W	0.127698	0.476749	0.818542		YDR421W	0.168268	0.154414	0.447569
YOL013C	-0.0531785	0.770329	0.999031		YOL013C	-1.47025	4.52166e-32	1.78858e-31		YOL013C	-1.41707	1.33641e-26	5.21847e-26		YOL013C	0.0882444	0.563245	0.855998		YOL013C	0.141423	0.154654	0.447945
YFL005W	0.109374	0.334807	0.999031		YFL005W	1.97306	2.36965e-136	4.69629e-135		YFL005W	1.86368	3.3678e-117	6.67447e-116		YFL005W	-0.00265147	0.974087	0.993165		YFL005W	-0.112026	0.154715	0.447945
YJL125C	-0.0282363	0.827296	0.999031		YJL125C	0.165295	0.0684537	0.0815273		YJL125C	0.193531	0.036023	0.0449375		YJL125C	-0.145137	0.146642	0.538781		YJL125C	-0.116901	0.154828	0.448025
YDR047W	0.0749241	0.599851	0.999031		YDR047W	1.40137	7.35966e-45	3.94355e-44		YDR047W	1.32645	1.71992e-38	9.4343e-38		YDR047W	-0.0606861	0.568164	0.857393		YDR047W	-0.13561	0.154955	0.448143
YDR436W	-0.144646	0.382649	0.999031		YDR436W	-1.08968	1.65166e-21	4.94986e-21		YDR436W	-0.945032	3.13429e-15	8.37789e-15		YDR436W	-0.0128629	0.925378	0.97893		YDR436W	0.131783	0.155064	0.448211
YDR165W	-0.104148	0.337691	0.999031		YDR165W	0.299985	8.67662e-05	0.000130998		YDR165W	0.404133	1.64654e-07	3.06482e-07		YDR165W	-0.205195	0.0123747	0.175649		YDR165W	-0.101047	0.155876	0.448636
YOL033W	-0.264388	0.168114	0.956742		YOL033W	-0.863589	8.90257e-11	1.83277e-10		YOL033W	-0.599201	1.42343e-05	2.37047e-05		YOL033W	-0.113826	0.476379	0.818542		YOL033W	0.150562	0.155715	0.448636
YOL020W	0.0848855	0.49761	0.999031		YOL020W	-0.692341	2.44668e-15	6.01995e-15		YOL020W	-0.777226	3.8943e-18	1.15927e-17		YOL020W	-0.0273405	0.77812	0.949566		YOL020W	-0.112226	0.155671	0.448636
YJL099W	0.10325	0.576276	0.999031		YJL099W	-1.01959	3.07384e-16	7.82937e-16		YJL099W	-1.12284	1.70492e-16	4.75717e-16		YJL099W	0.247146	0.109707	0.486218		YJL099W	0.143896	0.155466	0.448636
YJR027W	-0.270231	0.025485	0.481504		YJR027W	-5.01394	0	0		YJR027W	-4.74371	0	0		YJR027W	-0.155021	0.0840321	0.433773		YJR027W	0.11521	0.155587	0.448636
YKL204W	-0.145186	0.237497	0.982177		YKL204W	0.63608	1.75462e-13	4.01978e-13		YKL204W	0.781266	4.16525e-19	1.28488e-18		YKL204W	-0.0256852	0.774175	0.948585		YKL204W	0.119501	0.155898	0.448636
YIL082W-A	-0.216378	0.5158	0.999031		YIL082W-A	-4.48574	2.96405e-86	3.32421e-85		YIL082W-A	-4.26936	3.16899e-69	3.37113e-68		YIL082W-A	-0.0689209	0.827546	0.961997		YIL082W-A	0.147457	0.15561	0.448636
YCR034W	-0.0359579	0.731585	0.999031		YCR034W	-0.18606	0.0118103	0.0150808		YCR034W	-0.150102	0.0435004	0.053813		YCR034W	-0.137326	0.073469	0.404721		YCR034W	-0.101368	0.155871	0.448636
YOR004W	-0.0861466	0.592882	0.999031		YOR004W	1.10653	1.91987e-22	5.90031e-22		YOR004W	1.19267	1.76327e-25	6.65625e-25		YOR004W	-0.241096	0.0417779	0.308375		YOR004W	-0.154949	0.156083	0.448756
YMR261C	-0.0193124	0.875486	0.999031		YMR261C	-0.121972	0.157131	0.179317		YMR261C	-0.10266	0.243797	0.274005		YMR261C	0.0974537	0.287991	0.707883		YMR261C	0.116766	0.156111	0.448756
YGR017W	0.0586291	0.705498	0.999031		YGR017W	-1.1071	1.56498e-25	5.2199e-25		YGR017W	-1.16573	7.7309e-25	2.86053e-24		YGR017W	0.184961	0.145184	0.536763		YGR017W	0.126332	0.15646	0.449399
YLR154C	0.29544	0.211868	#N/A		YLR154C	1.66839	2.28482e-24	7.38674e-24		YLR154C	1.37295	9.12207e-16	2.49007e-15		YLR154C	0.0740506	0.676906	#N/A		YLR154C	-0.221389	0.156563	0.449399
YFL049W	-0.0842157	0.581707	0.999031		YFL049W	-0.185451	0.0788234	0.0930731		YFL049W	-0.101236	0.360087	0.393471		YFL049W	0.0468844	0.7	0.914072		YFL049W	0.1311	0.156593	0.449399
YLR139C	-0.00236966	0.989748	0.999343		YLR139C	-1.5686	3.52725e-35	1.51538e-34		YLR139C	-1.56623	1.40711e-31	6.36664e-31		YLR139C	0.1503	0.315092	0.727543		YLR139C	0.152669	0.156807	0.449496
YPL247C	0.143902	0.408471	0.999031		YPL247C	-1.10262	5.72632e-21	1.69245e-20		YPL247C	-1.24652	3.18896e-22	1.09263e-21		YPL247C	0.27897	0.0553565	0.356134		YPL247C	0.135068	0.157032	0.449496
YPL183W-A	0.500813	0.0333729	0.554965		YPL183W-A	4.86142	1.68916e-194	4.88758e-193		YPL183W-A	4.36061	4.62627e-146	1.16909e-144		YPL183W-A	0.223987	0.0870857	0.442573		YPL183W-A	-0.276826	0.157057	0.449496
YKL021C	0.0930919	0.501739	0.999031		YKL021C	0.265794	0.00614398	0.00808808		YKL021C	0.172702	0.0809762	0.0969403		YKL021C	-0.0352256	0.736908	0.931978		YKL021C	-0.128318	0.156731	0.449496
YKR018C	0.12529	0.292786	0.999031		YKR018C	0.0332916	0.687768	0.713155		YKR018C	-0.0919985	0.282282	0.313725		YKR018C	0.0194672	0.833661	0.961997		YKR018C	-0.105823	0.15697	0.449496
YLL013C	0.129068	0.34601	0.999031		YLL013C	-0.294241	0.00196046	0.00269162		YLL013C	-0.42331	1.77072e-05	2.9286e-05		YLL013C	0.255364	0.0138899	0.18387		YLL013C	0.126295	0.157529	0.450128
YNL070W	0.205772	0.150147	0.941618		YNL070W	1.55805	7.75595e-55	5.10042e-54		YNL070W	1.35228	6.96104e-40	3.97666e-39		YNL070W	0.0679983	0.515733	0.837582		YNL070W	-0.137774	0.157536	0.450128
YNL038W	0.105783	0.689903	#N/A		YNL038W	-0.497486	0.00690471	0.009032		YNL038W	-0.603269	0.00156219	0.00223275		YNL038W	-0.0976784	0.660901	#N/A		YNL038W	-0.203462	0.157434	0.450128
YDR198C	0.0244615	0.899351	0.999031		YDR198C	-0.145858	0.279827	0.307745		YDR198C	-0.17032	0.218857	0.247707		YDR198C	-0.134546	0.39233	0.783895		YDR198C	-0.159008	0.157646	0.450196
YGL119W	0.0730434	0.67343	0.999031		YGL119W	0.372156	0.00205127	0.00281362		YGL119W	0.299112	0.0161593	0.0209206		YGL119W	-0.0773666	0.571483	0.859108		YGL119W	-0.15041	0.157923	0.450741
YOR126C	0.0393483	0.849164	0.999031		YOR126C	0.250864	0.082481	0.0970947		YOR126C	0.211516	0.153242	0.177754		YOR126C	-0.135871	0.411752	#N/A		YOR126C	-0.175219	0.158023	0.45078
YGL105W	0.0214976	0.817111	0.999031		YGL105W	0.323851	8.00552e-07	1.36741e-06		YGL105W	0.302353	4.38782e-06	7.54376e-06		YGL105W	-0.0700363	0.29273	0.711981		YGL105W	-0.091534	0.158334	0.45142
YPL159C	0.137152	0.454314	0.999031		YPL159C	0.167392	0.17663	0.20007		YPL159C	0.0302394	0.822887	0.841798		YPL159C	0.290566	0.048832	0.336818		YPL159C	0.153413	0.158654	0.451456
YBR007C	-0.113955	0.473056	0.999031		YBR007C	-0.862171	3.84441e-15	9.38322e-15		YBR007C	-0.748216	7.29113e-11	1.61848e-10		YBR007C	0.0158109	0.90276	0.973475		YBR007C	0.129766	0.158692	0.451456
YCR024C	-0.282623	0.186079	0.976319		YCR024C	-1.28174	5.99547e-18	1.61903e-17		YCR024C	-0.999116	8.13026e-11	1.80199e-10		YCR024C	-0.121473	0.501186	0.833077		YCR024C	0.16115	0.158667	0.451456
YAL043C	-0.0701599	0.596576	0.999031		YAL043C	-0.840437	1.10248e-19	3.13207e-19		YAL043C	-0.770277	4.64334e-16	1.28201e-15		YAL043C	0.0511295	0.612125	0.88146		YAL043C	0.121289	0.158539	0.451456
YJL138C	-0.0165978	0.847258	0.999031		YJL138C	0.320634	1.40228e-07	2.49003e-07		YJL138C	0.337232	3.16908e-08	6.11927e-08		YJL138C	-0.102059	0.0953405	0.460187		YJL138C	-0.0854612	0.158937	0.451835
YCR093W	-0.150652	0.129157	0.915939		YCR093W	-1.30777	2.96006e-78	2.92319e-77		YCR093W	-1.15712	2.01266e-60	1.80858e-59		YCR093W	-0.0568916	0.439869	0.806262		YCR093W	0.0937599	0.158998	0.451835
YMR239C	-0.0197847	0.905759	0.999031		YMR239C	0.0745454	0.524237	0.554821		YMR239C	0.0943301	0.429004	0.462835		YMR239C	-0.164001	0.214163	0.630054		YMR239C	-0.144216	0.159248	0.4523
YGR122W	0.184473	0.515638	#N/A		YGR122W	2.00286	5.09078e-24	1.62854e-23		YGR122W	1.81839	3.49954e-19	1.08356e-18		YGR122W	-0.0865441	0.677904	#N/A		YGR122W	-0.271018	0.159434	0.452398
YNL243W	-0.126611	0.193132	0.977774		YNL243W	-0.0967097	0.156711	0.178873		YNL243W	0.0299013	0.666117	0.693562		YNL243W	-0.0348075	0.629559	0.886841		YNL243W	0.0918034	0.159456	0.452398
YOR083W	0.353111	0.142027	0.927907		YOR083W	1.41685	1.52308e-17	4.05616e-17		YOR083W	1.06374	9.39196e-10	1.97211e-09		YOR083W	0.132778	0.466498	#N/A		YOR083W	-0.220333	0.159986	0.453655
YBR146W	-0.0348359	0.769732	0.999031		YBR146W	-0.409143	7.08751e-07	1.21419e-06		YBR146W	-0.374307	1.2741e-05	2.12975e-05		YBR146W	0.0692409	0.456885	0.813352		YBR146W	0.104077	0.160527	0.454942
YOR158W	-0.0800103	0.573276	0.999031		YOR158W	0.939877	1.41711e-21	4.25353e-21		YOR158W	1.01989	2.17231e-23	7.66536e-23		YOR158W	0.0512053	0.631796	0.886842		YOR158W	0.131216	0.160964	0.454946
YBR069C	0.0902776	0.476174	0.999031		YBR069C	-0.26931	0.00250519	0.00341039		YBR069C	-0.359588	6.577e-05	0.000104449		YBR069C	-0.0295355	0.752213	0.937781		YBR069C	-0.119813	0.160945	0.454946
YBR139W	0.0380349	0.76901	0.999031		YBR139W	-0.0203793	0.820735	0.837741		YBR139W	-0.0584142	0.530807	0.563216		YBR139W	0.155944	0.113437	0.494208		YBR139W	0.117909	0.160796	0.454946
YNL074C	0.0436291	0.683148	0.999031		YNL074C	-0.370062	6.01832e-07	1.03532e-06		YNL074C	-0.413691	7.71985e-08	1.45948e-07		YNL074C	0.139239	0.0908509	0.448139		YNL074C	0.0956097	0.160641	0.454946
YHL023C	-0.324552	0.0510809	0.699998		YHL023C	-1.67506	6.84684e-47	3.84686e-46		YHL023C	-1.35051	5.97197e-30	2.57524e-29		YHL023C	-0.199047	0.155769	0.549402		YHL023C	0.125505	0.160935	0.454946
YDL173W	0.00502356	0.966739	0.999031		YDL173W	0.835735	3.6717e-23	1.14731e-22		YDL173W	0.830711	4.77504e-22	1.62357e-21		YDL173W	-0.105423	0.247127	0.664184		YDL173W	-0.110447	0.161279	0.455174
YOL009C	0.428158	0.203516	#N/A		YOL009C	0.900846	9.35902e-05	0.000140933		YOL009C	0.472688	0.0540367	0.0661681		YOL009C	0.144084	0.591899	#N/A		YOL009C	-0.284074	0.161324	0.455174
YPL088W	0.2956	0.138571	0.926588		YPL088W	-0.136098	0.304736	0.333745		YPL088W	-0.431698	0.00379957	0.00522408		YPL088W	0.454324	0.0056791	0.105287		YPL088W	0.158724	0.161405	0.455174
YBR029C	-0.0867668	0.441597	0.999031		YBR029C	-0.277536	0.000463649	0.000667448		YBR029C	-0.190769	0.0173556	0.022399		YBR029C	-0.187654	0.0305606	0.267422		YBR029C	-0.100887	0.16122	0.455174
YER163C	0.029922	0.872186	0.999031		YER163C	-0.377984	0.00355299	0.004775		YER163C	-0.407907	0.00222054	0.00312886		YER163C	-0.119636	0.431997	0.801346		YER163C	-0.149558	0.16148	0.455174
YPL162C	-0.0846191	0.737173	0.999031		YPL162C	-0.352689	0.0475897	0.0576516		YPL162C	-0.26807	0.133259	0.155728		YPL162C	-0.293988	0.14749	#N/A		YPL162C	-0.209369	0.161666	0.455403
YKL186C	0.0504683	0.711959	0.999031		YKL186C	-0.331988	0.000508757	0.000728215		YKL186C	-0.382456	9.18388e-05	0.000144343		YKL186C	-0.0688132	0.519552	0.838145		YKL186C	-0.119282	0.161735	0.455403
YMR287C	-0.0906625	0.629164	0.999031		YMR287C	-1.24604	3.05743e-22	9.33685e-22		YMR287C	-1.15537	3.18729e-17	9.16288e-17		YMR287C	0.0477472	0.764674	0.945533		YMR287C	0.13841	0.162204	0.456478
YDR423C	0.0565412	0.756377	0.999031		YDR423C	-0.956004	1.90995e-14	4.54664e-14		YDR423C	-1.01255	2.40125e-14	6.17053e-14		YDR423C	0.207644	0.156628	0.549402		YDR423C	0.151103	0.1629	0.45696
YOR390W	-0.246235	0.191666	0.977774		YOR390W	-1.63525	3.61015e-34	1.51062e-33		YOR390W	-1.38901	1.05872e-25	4.02021e-25		YOR390W	-0.390409	0.0133754	0.180567		YOR390W	-0.144175	0.162509	0.45696
YGL025C	-0.212183	0.163787	0.951618		YGL025C	-0.23637	0.025952	0.0322008		YGL025C	-0.0241871	0.82492	0.843579		YGL025C	-0.0808057	0.500164	0.832001		YGL025C	0.131377	0.162705	0.45696
YGR206W	0.586204	0.0333667	#N/A		YGR206W	0.0303292	0.869396	0.882047		YGR206W	-0.555875	0.00660621	0.00884547		YGR206W	0.371276	0.104213	#N/A		YGR206W	-0.214928	0.162619	0.45696
YLR170C	0.139388	0.486443	0.999031		YLR170C	2.48158	6.7695e-71	5.87333e-70		YLR170C	2.34219	1.21355e-59	1.07547e-58		YLR170C	-0.0579059	0.683117	0.907671		YLR170C	-0.197294	0.162872	0.45696
YBR025C	0.0516336	0.635792	0.999031		YBR025C	0.252053	0.00106473	0.00149083		YBR025C	0.20042	0.00940266	0.0124316		YBR025C	-0.0551167	0.478016	0.818771		YBR025C	-0.10675	0.162869	0.45696
YGL231C	0.193325	0.100442	0.872722		YGL231C	0.201401	0.0140496	0.0178223		YGL231C	0.00807617	0.923778	0.931829		YGL231C	0.0866143	0.332739	0.743585		YGL231C	-0.106711	0.163097	0.457022
YMR026C	0.162301	0.496746	0.999031		YMR026C	-0.729851	9.52448e-06	1.52597e-05		YMR026C	-0.892152	2.43111e-07	4.48911e-07		YMR026C	-0.0179208	0.928903	#N/A		YMR026C	-0.180222	0.163013	0.457022
YPL116W	-0.174046	0.256111	0.992666		YPL116W	-0.803936	3.99643e-14	9.40519e-14		YPL116W	-0.62989	1.15222e-08	2.2804e-08		YPL116W	-0.0493834	0.69156	0.912623		YPL116W	0.124662	0.163246	0.457193
YER076C	0.415313	0.220583	#N/A		YER076C	-0.407991	0.0758689	0.0898518		YER076C	-0.823304	0.000955937	0.00138821		YER076C	0.165272	0.565591	#N/A		YER076C	-0.250041	0.16351	0.457687
YOR243C	-0.113014	0.300524	0.999031		YOR243C	0.760305	4.71706e-23	1.46998e-22		YOR243C	0.873319	1.80968e-29	7.71746e-29		YOR243C	-0.215758	0.00732496	0.126842		YOR243C	-0.102743	0.16372	0.45797
YLR176C	-0.153558	0.42135	0.999031		YLR176C	-0.904123	7.52484e-12	1.61282e-11		YLR176C	-0.750565	5.32808e-08	1.01527e-07		YLR176C	0.000865943	0.995556	0.997479		YLR176C	0.154424	0.163786	0.45797
YDR517W	0.121238	0.328987	0.999031		YDR517W	0.0183734	0.831846	0.847666		YDR517W	-0.102865	0.248276	0.278606		YDR517W	0.011736	0.902744	0.973475		YDR517W	-0.109502	0.164363	0.459001
YML014W	0.124647	0.408595	0.999031		YML014W	-0.0170849	0.870659	0.883018		YML014W	-0.141731	0.190875	0.218428		YML014W	-0.00539746	0.963629	0.990463		YML014W	-0.130044	0.164255	0.459001
YMR125W	0.0486021	0.645076	0.999031		YMR125W	0.937617	8.96057e-37	3.99806e-36		YMR125W	0.889015	3.00142e-32	1.37961e-31		YMR125W	-0.0505073	0.51619	0.837992		YMR125W	-0.0991094	0.164418	0.459001
YKL059C	-0.288403	0.0698516	0.800084		YKL059C	-0.128013	0.248484	0.275686		YKL059C	0.16039	0.159574	0.184433		YKL059C	-0.155468	0.221331	0.638328		YKL059C	0.132935	0.164582	0.459213
YDR365W-B	-0.173668	0.143833	0.929574		YDR365W-B	-4.94764	0	0		YDR365W-B	-4.77398	0	0		YDR365W-B	-0.063737	0.472095	0.818542		YDR365W-B	0.109931	0.16472	0.459354
YOR092W	0.0723955	0.687195	0.999031		YOR092W	-1.73479	4.80014e-44	2.52991e-43		YOR092W	-1.80718	3.34064e-44	2.13145e-43		YOR092W	-0.0602069	0.692655	0.912623		YOR092W	-0.132602	0.165022	0.459587
YLR093C	-0.0425017	0.81504	0.999031		YLR093C	1.05645	6.00233e-17	1.56466e-16		YLR093C	1.09895	3.97539e-17	1.13496e-16		YLR093C	0.127401	0.342894	0.750057		YLR093C	0.169903	0.164906	0.459587
YMR120C	-0.113644	0.463951	0.999031		YMR120C	0.0107847	0.920035	0.927892		YMR120C	0.124428	0.266477	0.297646		YMR120C	0.0196743	0.871768	0.964392		YMR120C	0.133318	0.165068	0.459587
YLL012W	-0.17935	0.341055	0.999031		YLL012W	-0.795722	2.3849e-09	4.58671e-09		YLL012W	-0.616372	3.64013e-06	6.27882e-06		YLL012W	-0.330403	0.0316205	0.270039		YLL012W	-0.151053	0.165274	0.459672
YPL207W	-0.0986537	0.382883	0.999031		YPL207W	-0.853478	6.63796e-27	2.29611e-26		YPL207W	-0.754825	6.1903e-21	2.03541e-20		YPL207W	-0.195561	0.0278397	0.257436		YPL207W	-0.0969071	0.165239	0.459672
YPR149W	-0.132722	0.182003	0.971926		YPR149W	0.707368	5.22869e-24	1.67174e-23		YPR149W	0.84009	1.28727e-32	5.97866e-32		YPR149W	-0.0374017	0.60261	0.876862		YPR149W	0.0953201	0.165707	0.460196
YPR168W	-0.515285	0.0839436	#N/A		YPR168W	1.06322	2.68978e-07	4.6998e-07		YPR168W	1.57851	2.043e-13	5.072e-13		YPR168W	-0.249638	0.274108	#N/A		YPR168W	0.265647	0.166078	0.460196
YMR188C	0.364371	0.0342087	0.564635		YMR188C	2.89248	1.08697e-130	2.03569e-129		YMR188C	2.52811	7.26672e-92	1.08663e-90		YMR188C	0.192885	0.106496	0.483471		YMR188C	-0.171486	0.166014	0.460196
YMR253C	-0.101366	0.594883	0.999031		YMR253C	-0.410804	0.00169251	0.00233648		YMR253C	-0.309438	0.0255879	0.0324233		YMR253C	0.0502906	0.747234	0.934954		YMR253C	0.151656	0.16598	0.460196
YBR203W	-0.230061	0.252844	0.986566		YBR203W	-1.12888	2.97413e-15	7.29602e-15		YBR203W	-0.898817	2.11705e-10	4.59197e-10		YBR203W	-0.377294	0.0272263	0.2559		YBR203W	-0.147234	0.165804	0.460196
YNL333W	0.336802	0.318825	#N/A		YNL333W	0.736851	0.00161532	0.00223312		YNL333W	0.400048	0.101104	0.119699		YNL333W	0.0499038	0.851677	#N/A		YNL333W	-0.286899	0.166079	0.460196
YFL060C	0.50727	0.291908	#N/A		YFL060C	-1.34489	2.9525e-05	4.59305e-05		YFL060C	-1.85216	2.25391e-07	4.16988e-07		YFL060C	0.201472	0.637659	#N/A		YFL060C	-0.305799	0.165674	0.460196
YDL007W	0.113941	0.281522	0.999031		YDL007W	1.29921	1.35464e-68	1.12796e-67		YDL007W	1.18526	1.1015e-55	9.05456e-55		YDL007W	0.0136191	0.859608	0.963777		YDL007W	-0.100322	0.166806	0.460539
YDR131C	-0.28551	0.247103	0.986566		YDR131C	-0.917351	7.90574e-08	1.41906e-07		YDR131C	-0.631841	0.000383773	0.000574469		YDR131C	-0.10116	0.625875	#N/A		YDR131C	0.18435	0.167025	0.460539
YDR488C	0.13624	0.570683	0.999031		YDR488C	-0.652782	8.55755e-05	0.000129234		YDR488C	-0.789022	5.44206e-06	9.30375e-06		YDR488C	-0.0439568	0.82763	#N/A		YDR488C	-0.180197	0.166617	0.460539
YOR093C	-0.139213	0.374	0.999031		YOR093C	-1.31329	6.22562e-34	2.56973e-33		YOR093C	-1.17408	3.49404e-25	1.30874e-24		YOR093C	-0.0201964	0.877264	0.964749		YOR093C	0.119016	0.167068	0.460539
YGR072W	-0.273065	0.124663	0.905897		YGR072W	0.490059	7.27179e-05	0.000110248		YGR072W	0.763124	2.44504e-09	5.03718e-09		YGR072W	-0.119478	0.389753	0.781409		YGR072W	0.153587	0.166569	0.460539
YLR002C	-0.0470513	0.682374	0.999031		YLR002C	0.656343	4.58348e-16	1.15525e-15		YLR002C	0.703395	7.95945e-18	2.34409e-17		YLR002C	-0.153004	0.0739992	0.40655		YLR002C	-0.105953	0.167251	0.460539
YLR285W	0.0337415	0.810993	0.999031		YLR285W	0.468831	2.1122e-06	3.52765e-06		YLR285W	0.43509	1.54565e-05	2.56736e-05		YLR285W	-0.0935508	0.381435	0.776947		YLR285W	-0.127292	0.166948	0.460539
YPL064C	-0.530853	0.0359751	#N/A		YPL064C	-0.20881	0.240836	0.267817		YPL064C	0.322043	0.0734931	0.0884577		YPL064C	-0.325309	0.112171	#N/A		YPL064C	0.205544	0.167095	0.460539
YMR294W	-0.686374	0.030735	#N/A		YMR294W	2.19705	7.01248e-24	2.23096e-23		YMR294W	2.88343	9.72416e-36	4.96679e-35		YMR294W	-0.371875	0.0932933	#N/A		YMR294W	0.3145	0.167151	0.460539
YNL044W	0.106318	0.381696	0.999031		YNL044W	1.26763	3.18207e-50	1.93228e-49		YNL044W	1.16131	8.15141e-41	4.76969e-40		YNL044W	-0.00728947	0.935063	0.982284		YNL044W	-0.113608	0.16726	0.460539
YER047C	-0.00511783	0.976706	0.999031		YER047C	-0.679226	1.69635e-08	3.13535e-08		YER047C	-0.674108	1.20409e-07	2.25212e-07		YER047C	0.139169	0.323177	0.734546		YER047C	0.144287	0.166557	0.460539
YHR154W	-0.155323	0.242226	0.982177		YHR154W	-0.0598662	0.516777	0.547225		YHR154W	0.0954573	0.317363	0.349855		YHR154W	-0.0411183	0.69258	0.912623		YHR154W	0.114205	0.166816	0.460539
YDR277C	0.110684	0.619284	0.999031		YDR277C	-0.528235	0.000451667	0.000651332		YDR277C	-0.638919	9.93842e-05	0.000155906		YDR277C	0.287124	0.115436	0.49512		YDR277C	0.17644	0.167724	0.461221
YJL112W	-0.0688587	0.696849	0.999031		YJL112W	-1.20864	2.27637e-23	7.15554e-23		YJL112W	-1.13978	7.39496e-19	2.25948e-18		YJL112W	0.0668704	0.648803	0.898975		YJL112W	0.135729	0.167773	0.461221
YCL035C	0.478959	0.00137034	0.0894755		YCL035C	3.70092	5.70656e-279	2.77511e-277		YCL035C	3.22196	5.37629e-196	2.04688e-194		YCL035C	0.325276	0.00113047	0.0368831		YCL035C	-0.153682	0.167723	0.461221
YMR229C	-0.00948499	0.913945	0.999031		YMR229C	0.218844	0.000409484	0.000593015		YMR229C	0.228329	0.000241765	0.000367409		YMR229C	-0.0934251	0.139404	0.525842		YMR229C	-0.0839401	0.168071	0.461799
YJL055W	-0.0617816	0.660043	0.999031		YJL055W	1.18472	5.02721e-34	2.08997e-33		YJL055W	1.2465	7.1293e-35	3.53836e-34		YJL055W	0.0673506	0.519311	0.838145		YJL055W	0.129132	0.168777	0.463493
YOR344C	-0.162078	0.227481	0.982177		YOR344C	1.12273	1.60292e-32	6.40172e-32		YOR344C	1.2848	2.30413e-41	1.37181e-40		YOR344C	-0.284489	0.00466839	0.0944205		YOR344C	-0.122411	0.169057	0.464018
YGR036C	0.0441004	0.822012	0.999031		YGR036C	0.713069	1.87672e-07	3.31115e-07		YGR036C	0.668969	1.8854e-06	3.29832e-06		YGR036C	-0.123755	0.419685	0.792597		YGR036C	-0.167856	0.169267	0.46435
YGR161C-D	-0.436156	0.000416577	0.036992		YGR161C-D	-5.86847	0	0		YGR161C-D	-5.43231	0	0		YGR161C-D	-0.324532	0.000491796	0.0216477		YGR161C-D	0.111624	0.169477	0.464439
YHR030C	-0.00255558	0.982569	0.9991		YHR030C	-0.285542	0.000422462	0.000610563		YHR030C	-0.282987	0.000798802	0.00116587		YHR030C	0.097958	0.28314	0.703401		YHR030C	0.100514	0.169437	0.464439
YHR097C	0.285615	0.0590828	0.748961		YHR097C	0.100525	0.325594	0.354642		YHR097C	-0.18509	0.0969967	0.114954		YHR097C	0.41172	0.000618889	0.0242252		YHR097C	0.126105	0.169601	0.464536
YPR122W	-0.00288938	0.985209	0.9991		YPR122W	-1.44485	6.38874e-42	3.22334e-41		YPR122W	-1.44196	8.44517e-37	4.4673e-36		YPR122W	0.113633	0.384696	0.778113		YPR122W	0.116522	0.169793	0.464575
YJR111C	-0.17997	0.265841	0.999031		YJR111C	-0.0450257	0.693339	0.718416		YJR111C	0.134944	0.238804	0.268968		YJR111C	-0.312759	0.0158499	0.191094		YJR111C	-0.132789	0.169706	0.464575
YDR528W	-0.250178	0.180144	0.971926		YDR528W	-1.43402	2.07365e-28	7.48144e-28		YDR528W	-1.18384	1.14121e-18	3.46493e-18		YDR528W	-0.111779	0.476648	0.818542		YDR528W	0.138399	0.17002	0.464952
YMR109W	-0.0585103	0.592426	0.999031		YMR109W	-1.55484	3.38754e-92	4.1358e-91		YMR109W	-1.49633	1.38536e-81	1.80972e-80		YMR109W	0.0374158	0.655851	0.900048		YMR109W	0.095926	0.170447	0.465877
YPR048W	-0.0581284	0.684635	0.999031		YPR048W	0.25458	0.0111561	0.0142895		YPR048W	0.312708	0.00218884	0.00308946		YPR048W	-0.179968	0.108548	0.485151		YPR048W	-0.12184	0.170615	0.465928
YML009C	0.666773	0.0959154	#N/A		YML009C	5.51448	9.59617e-84	1.03413e-82		YML009C	4.84771	2.89243e-66	2.90599e-65		YML009C	0.182359	0.332267	#N/A		YML009C	-0.484413	0.170644	0.465928
YFL038C	0.0748481	0.496189	0.999031		YFL038C	1.12375	9.50925e-48	5.44313e-47		YFL038C	1.0489	4.37926e-41	2.586e-40		YFL038C	-0.0292945	0.712364	0.920036		YFL038C	-0.104143	0.170901	0.466387
YOL133W	0.276609	0.116502	0.894614		YOL133W	1.98977	5.69226e-60	4.10737e-59		YOL133W	1.71316	2.93671e-41	1.74305e-40		YOL133W	0.112925	0.382973	0.776947		YOL133W	-0.163684	0.171085	0.466401
YPL195W	-0.0969674	0.439503	0.999031		YPL195W	-0.291755	0.000811254	0.00114394		YPL195W	-0.194787	0.0309019	0.0388253		YPL195W	0.00979579	0.920572	0.978689		YPL195W	0.106763	0.171054	0.466401
YDR121W	0.228164	0.223366	0.982177		YDR121W	1.95818	1.75728e-51	1.09114e-50		YDR121W	1.73002	1.76299e-37	9.49063e-37		YDR121W	0.0549824	0.690239	0.912316		YDR121W	-0.173182	0.172017	0.467235
YOR197W	0.126107	0.220429	0.982177		YOR197W	-0.0942795	0.191278	0.215733		YOR197W	-0.220387	0.00267354	0.00373354		YOR197W	0.0323136	0.67342	0.90495		YOR197W	-0.0937939	0.171835	0.467235
YOR270C	0.00645376	0.946691	0.999031		YOR270C	-0.20322	0.00281228	0.00381855		YOR270C	-0.209674	0.00220028	0.00310394		YOR270C	-0.0838462	0.233397	0.647944		YOR270C	-0.0903	0.17174	0.467235
YOR311C	0.0511983	0.726351	0.999031		YOR311C	0.0918295	0.368196	0.398122		YOR311C	0.0406312	0.698278	0.724052		YOR311C	-0.0727343	0.526231	0.841947		YOR311C	-0.123933	0.171881	0.467235
YLL061W	-0.185273	0.192345	0.977774		YLL061W	-0.524236	1.76412e-07	3.1163e-07		YLL061W	-0.338963	0.000753648	0.00110275		YLL061W	-0.305481	0.00620022	0.111604		YLL061W	-0.120208	0.17182	0.467235
YLR227W-B	-0.269409	0.0224162	0.4524		YLR227W-B	-4.90963	0	0		YLR227W-B	-4.64022	0	0		YLR227W-B	-0.161776	0.0654546	0.384908		YLR227W-B	0.107633	0.172001	0.467235
YHR218W	0.136141	0.437746	0.999031		YHR218W	-1.05854	2.80127e-18	7.62869e-18		YHR218W	-1.19469	3.97869e-21	1.31494e-20		YHR218W	0.000269796	0.998511	0.998754		YHR218W	-0.135871	0.171768	0.467235
YIL130W	0.0211046	0.875601	0.999031		YIL130W	-1.14824	2.1283e-35	9.17772e-35		YIL130W	-1.16935	9.20981e-33	4.2947e-32		YIL130W	0.126711	0.25109	0.668143		YIL130W	0.105606	0.172232	0.467576
YHR069C	0.0125482	0.923871	0.999031		YHR069C	0.312144	0.000678882	0.000963623		YHR069C	0.299595	0.00140881	0.00202151		YHR069C	-0.10169	0.314847	0.727543		YHR069C	-0.114238	0.172341	0.467628
YOL129W	0.334493	0.0389619	0.619882		YOL129W	1.7208	1.16162e-53	7.48588e-53		YOL129W	1.38631	3.82851e-32	1.75559e-31		YOL129W	0.187401	0.121232	0.499281		YOL129W	-0.147093	0.172464	0.467698
YPL008W	-0.346106	0.160757	0.951618		YPL008W	-1.92209	5.87152e-29	2.14782e-28		YPL008W	-1.57598	5.02699e-19	1.5474e-18		YPL008W	-0.188631	0.38706	#N/A		YPL008W	0.157475	0.17271	0.467698
YBL097W	-0.313982	0.143361	0.927907		YBL097W	0.254777	0.0873701	0.102496		YBL097W	0.568758	0.000228686	0.00034799		YBL097W	-0.135626	0.425222	#N/A		YBL097W	0.178356	0.172664	0.467698
YNL021W	0.183272	0.192762	0.977774		YNL021W	-0.22519	0.0205804	0.0258013		YNL021W	-0.408463	5.91025e-05	9.41184e-05		YNL021W	0.0678803	0.545939	0.848235		YNL021W	-0.115392	0.172774	0.467698
YJL091C	-0.107856	0.445829	0.999031		YJL091C	-0.276493	0.00543666	0.00718309		YJL091C	-0.168637	0.0937024	0.111323		YJL091C	-0.225517	0.044193	0.316524		YJL091C	-0.117661	0.172938	0.467698
YJL053W	-0.159045	0.315126	0.999031		YJL053W	-0.0179917	0.870158	0.882665		YJL053W	0.141053	0.215209	0.243864		YJL053W	-0.0234398	0.849069	0.962932		YJL053W	0.135605	0.172865	0.467698
YAR066W	0.283014	0.457598	#N/A		YAR066W	0.065467	0.803928	0.822402		YAR066W	-0.217547	0.428912	0.462822		YAR066W	-0.0142977	0.963489	#N/A		YAR066W	-0.297312	0.172993	0.467698
YDR404C	0.0840325	0.586412	0.999031		YDR404C	1.47745	6.12391e-43	3.16986e-42		YDR404C	1.39342	3.11235e-36	1.61246e-35		YDR404C	-0.0553525	0.632389	0.886842		YDR404C	-0.139385	0.173102	0.46775
YOR323C	-0.000670006	0.994442	0.999505		YOR323C	0.468336	4.78894e-12	1.03602e-11		YOR323C	0.469006	6.39422e-12	1.49147e-11		YOR323C	-0.0905607	0.195208	0.610156		YOR323C	-0.0898908	0.173558	0.467943
YGR158C	0.0654619	0.649685	0.999031		YGR158C	0.944835	6.78179e-21	1.99523e-20		YGR158C	0.879373	1.42214e-17	4.1315e-17		YGR158C	-0.0636423	0.55753	0.852234		YGR158C	-0.129104	0.173502	0.467943
YNL234W	-0.346066	0.280826	#N/A		YNL234W	-1.19357	2.78605e-07	4.86361e-07		YNL234W	-0.847502	0.000128687	0.000199923		YNL234W	-0.567403	0.0402332	#N/A		YNL234W	-0.221337	0.173621	0.467943
YAL058W	-0.300308	0.0935059	0.848571		YAL058W	-1.47715	6.76423e-31	2.59236e-30		YAL058W	-1.17684	6.3197e-21	2.0756e-20		YAL058W	-0.431686	0.00420004	0.0883947		YAL058W	-0.131378	0.173588	0.467943
YAR015W	-0.000614875	0.996183	0.999505		YAR015W	0.665256	1.56594e-13	3.60178e-13		YAR015W	0.665871	3.69429e-13	9.05884e-13		YAR015W	-0.115803	0.231203	0.646811		YAR015W	-0.115189	0.173561	0.467943
YDR320C	0.0106133	0.929591	0.999031		YDR320C	-0.0687109	0.408149	0.438536		YDR320C	-0.0793242	0.36056	0.39384		YDR320C	0.113094	0.226356	0.642437		YDR320C	0.102481	0.174229	0.468054
YDR407C	-0.0790608	0.585221	0.999031		YDR407C	-1.4885	5.05819e-50	3.0587e-49		YDR407C	-1.40943	2.71769e-41	1.61637e-40		YDR407C	0.0341872	0.772958	0.948585		YDR407C	0.113248	0.174104	0.468054
YOR147W	-0.0642767	0.726361	0.999031		YOR147W	-1.26481	6.90896e-24	2.20045e-23		YOR147W	-1.20053	3.46541e-19	1.07357e-18		YOR147W	0.0675457	0.66497	0.903057		YOR147W	0.131822	0.174049	0.468054
YLR018C	0.184864	0.399595	0.999031		YLR018C	3.39436	3.677e-109	5.45611e-108		YLR018C	3.2095	2.11252e-92	3.19194e-91		YLR018C	-0.0393624	0.785624	0.953341		YLR018C	-0.224227	0.174138	0.468054
YMR032W	-0.151762	0.321815	0.999031		YMR032W	-0.400391	0.00016076	0.00023891		YMR032W	-0.248628	0.0244344	0.0310302		YMR032W	-0.0281591	0.819257	0.959718		YMR032W	0.123603	0.174289	0.468054
YHR012W	0.417285	0.0193235	0.435004		YHR012W	2.39631	5.54167e-85	6.1085e-84		YHR012W	1.97903	1.03309e-52	7.97132e-52		YHR012W	0.249006	0.0525822	0.34969		YHR012W	-0.168278	0.173944	0.468054
YAL028W	-0.551875	0.206912	#N/A		YAL028W	-2.06607	1.90652e-11	4.02078e-11		YAL028W	-1.51419	1.08875e-06	1.9333e-06		YAL028W	-0.282744	0.468311	#N/A		YAL028W	0.269131	0.174076	0.468054
YJL097W	-0.0151758	0.900661	0.999031		YJL097W	-0.124638	0.144227	0.165505		YJL097W	-0.109462	0.206092	0.234083		YJL097W	-0.122453	0.185041	0.593752		YJL097W	-0.107277	0.174603	0.468658
YPL262W	-0.00330381	0.975348	0.999031		YPL262W	-0.12523	0.096321	0.112472		YPL262W	-0.121927	0.108155	0.127603		YPL262W	-0.101796	0.194436	0.610156		YPL262W	-0.0984918	0.175119	0.469559
YBR105C	0.157436	0.468273	0.999031		YBR105C	-0.978635	1.52793e-11	3.23296e-11		YBR105C	-1.13607	1.97173e-12	4.70531e-12		YBR105C	0.313834	0.0879028	0.442573		YBR105C	0.156398	0.175034	0.469559
YGR288W	0.0134502	0.968445	#N/A		YGR288W	0.0541967	0.820838	0.837741		YGR288W	0.0407465	0.86603	0.880485		YGR288W	-0.250595	0.368506	#N/A		YGR288W	-0.264046	0.175304	0.469574
YMR158W	-0.109715	0.527415	0.999031		YMR158W	0.112868	0.34734	0.376697		YMR158W	0.222583	0.0758148	0.0911006		YMR158W	0.0369705	0.785378	0.953341		YMR158W	0.146685	0.175236	0.469574
YBR063C	-0.520785	0.581123	#N/A		YBR063C	-5.62716	3.16919e-17	8.35921e-17		YBR063C	-5.10637	2.1289e-14	5.48529e-14		YBR063C	-0.284374	0.759172	#N/A		YBR063C	0.236409	0.175682	0.470346
YPR013C	-0.167699	0.522571	#N/A		YPR013C	-1.01728	4.6443e-08	8.43583e-08		YPR013C	-0.849585	4.25509e-06	7.31991e-06		YPR013C	-0.354021	0.112831	#N/A		YPR013C	-0.186323	0.175773	0.470348
YLR033W	-0.0815278	0.606731	0.999031		YLR033W	0.570436	1.85729e-07	3.27788e-07		YLR033W	0.651964	1.24394e-08	2.45774e-08		YLR033W	0.0548575	0.653477	0.900048		YLR033W	0.136385	0.17591	0.470475
YDR228C	-0.104468	0.479976	0.999031		YDR228C	-0.253165	0.0135667	0.0172399		YDR228C	-0.148697	0.162916	0.187995		YDR228C	0.0191623	0.869106	0.964392		YDR228C	0.12363	0.176158	0.470571
YOR251C	0.0245367	0.846183	0.999031		YOR251C	0.871865	6.06156e-23	1.88087e-22		YOR251C	0.847328	7.47067e-21	2.44668e-20		YOR251C	-0.087089	0.36365	0.75973		YOR251C	-0.111626	0.17608	0.470571
YLR283W	-0.132232	0.651745	#N/A		YLR283W	-1.29567	7.36456e-11	1.52319e-10		YLR283W	-1.16344	6.32782e-08	1.20299e-07		YLR283W	0.0611872	0.81088	#N/A		YLR283W	0.193419	0.176216	0.470571
YDL048C	-0.0884134	0.711736	0.999031		YDL048C	-0.65906	9.12356e-05	0.000137638		YDL048C	-0.570646	0.000784551	0.00114594		YDL048C	-0.262642	0.192516	#N/A		YDL048C	-0.174228	0.176648	0.470948
YDR151C	-0.0312681	0.817877	0.999031		YDR151C	0.262479	0.00513678	0.00680708		YDR151C	0.293747	0.00277259	0.00386161		YDR151C	0.0840244	0.426271	0.796993		YDR151C	0.115292	0.176718	0.470948
YOR115C	-0.0541875	0.747825	0.999031		YOR115C	0.35389	0.00276504	0.00375618		YOR115C	0.408077	0.000679005	0.000997057		YOR115C	-0.19634	0.135934	0.520639		YOR115C	-0.142152	0.176633	0.470948
YMR030W	0.00726331	0.979624	#N/A		YMR030W	0.120086	0.53041	0.560636		YMR030W	0.112823	0.591666	0.62288		YMR030W	0.227681	0.328407	#N/A		YMR030W	0.220418	0.176558	0.470948
YPR185W	-0.0239187	0.893611	0.999031		YPR185W	-1.33854	5.81904e-28	2.06721e-27		YPR185W	-1.31462	8.30173e-24	2.9729e-23		YPR185W	0.106388	0.479897	0.81994		YPR185W	0.130306	0.176841	0.471035
YNL067W	0.0181601	0.866905	0.999031		YNL067W	3.25485	0	0		YNL067W	3.23669	0	0		YNL067W	-0.0856175	0.261896	0.678977		YNL067W	-0.103778	0.177332	0.472103
YJR075W	-0.171199	0.115188	0.894614		YJR075W	-0.734011	1.03505e-21	3.11675e-21		YJR075W	-0.562812	2.7249e-13	6.71593e-13		YJR075W	-0.265003	0.00150291	0.0453525		YJR075W	-0.0938036	0.177563	0.472346
YEL036C	0.0030627	0.979308	0.9991		YEL036C	-0.502642	1.18343e-09	2.30901e-09		YEL036C	-0.505705	2.03063e-09	4.19088e-09		YEL036C	-0.0963504	0.296126	0.711981		YEL036C	-0.0994131	0.177664	0.472346
YHR142W	0.0921979	0.532686	0.999031		YHR142W	0.326246	0.00153769	0.00212937		YHR142W	0.234048	0.0271926	0.0343588		YHR142W	-0.0336887	0.768622	0.947275		YHR142W	-0.125887	0.177695	0.472346
YDR301W	-0.0884306	0.532084	0.999031		YDR301W	-1.24657	4.04917e-37	1.82355e-36		YDR301W	-1.15814	8.869e-30	3.81314e-29		YDR301W	0.0227698	0.842919	0.961997		YDR301W	0.1112	0.178349	0.473123
YLR413W	-0.0763349	0.510678	0.999031		YLR413W	-0.705767	7.45308e-18	2.00703e-17		YLR413W	-0.629432	1.79857e-14	4.65074e-14		YLR413W	-0.185213	0.0260481	0.252743		YLR413W	-0.108878	0.178237	0.473123
YJR059W	0.0696883	0.556776	0.999031		YJR059W	-0.853713	1.55586e-25	5.19248e-25		YJR059W	-0.923401	6.11501e-27	2.41389e-26		YJR059W	0.167021	0.0756277	0.412186		YJR059W	0.0973331	0.178161	0.473123
YHL017W	0.123657	0.429378	0.999031		YHL017W	-0.185535	0.0871531	0.102262		YHL017W	-0.309191	0.00611862	0.00822687		YHL017W	-0.00187054	0.988122	0.995933		YHL017W	-0.125527	0.178333	0.473123
YJR092W	-0.00699708	0.95301	0.999031		YJR092W	-0.236742	0.00417504	0.0055709		YJR092W	-0.229745	0.00704632	0.00940865		YJR092W	0.0962204	0.287937	0.707883		YJR092W	0.103217	0.17903	0.474689
YLR436C	-0.275629	0.0880324	0.838129		YLR436C	-2.31726	8.14534e-94	1.0072e-92		YLR436C	-2.04163	1.11939e-69	1.19961e-68		YLR436C	-0.165766	0.234169	0.648032		YLR436C	0.109862	0.179288	0.474986
YNL222W	0.137419	0.519185	0.999031		YNL222W	1.77314	9.59659e-33	3.85128e-32		YNL222W	1.63572	8.79198e-27	3.45412e-26		YNL222W	-0.0561725	0.720583	0.923283		YNL222W	-0.193591	0.179324	0.474986
YDL035C	-0.422179	0.0115602	0.333293		YDL035C	-0.361967	0.00207716	0.00284577		YDL035C	0.0602122	0.612461	0.643251		YDL035C	-0.289287	0.0316493	0.270039		YDL035C	0.132892	0.180012	0.475193
YNR018W	-0.054796	0.648562	0.999031		YNR018W	0.734729	3.73305e-18	1.01186e-17		YNR018W	0.789525	2.46691e-20	7.96209e-20		YNR018W	-0.163443	0.0659304	0.385439		YNR018W	-0.108647	0.179627	0.475193
YJL198W	-0.0273665	0.834041	0.999031		YJL198W	-0.926787	6.248e-24	1.99323e-23		YJL198W	-0.899421	3.405e-22	1.16458e-21		YJL198W	-0.1414	0.153712	0.549402		YJL198W	-0.114034	0.180039	0.475193
YKL141W	-0.0765744	0.737979	0.999031		YKL141W	4.99557	3.29695e-238	1.30681e-236		YKL141W	5.07215	3.52057e-192	1.31442e-190		YKL141W	0.182586	0.137199	0.521355		YKL141W	0.25916	0.179663	0.475193
YER095W	0.335826	0.0212592	0.445884		YER095W	1.68135	8.48755e-63	6.4122e-62		YER095W	1.34552	3.4967e-37	1.86846e-36		YER095W	0.205352	0.0585708	0.366531		YER095W	-0.130474	0.179988	0.475193
YER118C	-0.0781867	0.539629	0.999031		YER118C	-0.339523	0.000147966	0.000220293		YER118C	-0.261336	0.00399476	0.00548072		YER118C	-0.183883	0.0664823	0.386704		YER118C	-0.105696	0.179779	0.475193
YIL147C	-0.303621	0.0476845	0.676419		YIL147C	-1.72931	2.81948e-58	1.98014e-57		YIL147C	-1.42569	7.83629e-39	4.33958e-38		YIL147C	-0.186497	0.138874	0.524806		YIL147C	0.117124	0.180004	0.475193
YDR339C	0.124614	0.290043	0.999031		YDR339C	0.340671	3.24761e-05	5.03724e-05		YDR339C	0.216057	0.010619	0.0139759		YDR339C	0.0237437	0.793248	0.955932		YDR339C	-0.100871	0.180186	0.475233
YCR087C-A	0.101779	0.627658	0.999031		YCR087C-A	3.90514	1.72929e-155	3.93992e-154		YCR087C-A	3.80336	2.58671e-142	6.36991e-141		YCR087C-A	-0.111003	0.418437	0.79246		YCR087C-A	-0.212781	0.180236	0.475233
YNL251C	0.040668	0.691621	0.999031		YNL251C	-0.496219	4.97984e-12	1.07571e-11		YNL251C	-0.536887	2.12312e-13	5.25964e-13		YNL251C	-0.0485062	0.533929	0.845596		YNL251C	-0.0891742	0.180333	0.475251
YDL133W	-0.0657448	0.753957	0.999031		YDL133W	-0.810115	1.47767e-08	2.7364e-08		YDL133W	-0.74437	1.22694e-06	2.17401e-06		YDL133W	0.0857353	0.627342	0.885727		YDL133W	0.15148	0.180794	0.475506
YMR204C	0.0640868	0.825308	#N/A		YMR204C	-0.937037	1.37806e-06	2.33046e-06		YMR204C	-1.00112	3.55544e-06	6.13639e-06		YMR204C	0.26602	0.283555	#N/A		YMR204C	0.201933	0.180775	0.475506
YMR208W	-0.06866	0.540331	0.999031		YMR208W	-0.216152	0.00616602	0.00811341		YMR208W	-0.147492	0.064081	0.0776622		YMR208W	-0.16773	0.0464682	0.32711		YMR208W	-0.0990698	0.180693	0.475506
YNL157W	0.393569	0.00714783	0.249708		YNL157W	1.56422	1.62638e-54	1.0587e-53		YNL157W	1.17065	3.10185e-28	1.27489e-27		YNL157W	0.263998	0.0161315	0.191895		YNL157W	-0.129572	0.180657	0.475506
YLR361C-A	0.580727	0.0205253	#N/A		YLR361C-A	1.99484	1.93759e-31	7.56091e-31		YLR361C-A	1.41412	1.20524e-14	3.13752e-14		YLR361C-A	0.357418	0.055889	#N/A		YLR361C-A	-0.223309	0.181192	0.475833
YNL307C	0.00526248	0.957862	0.999031		YNL307C	-0.561678	9.33329e-16	2.32609e-15		YNL307C	-0.56694	1.34171e-15	3.63847e-15		YNL307C	-0.0815726	0.280166	0.701864		YNL307C	-0.0868352	0.18103	0.475833
YJR126C	0.154995	0.309673	0.999031		YJR126C	-0.498001	2.51648e-06	4.17873e-06		YJR126C	-0.652997	2.83867e-09	5.82531e-09		YJR126C	0.0318535	0.793428	0.955932		YJR126C	-0.123142	0.181147	0.475833
YDL088C	-0.00490301	0.967748	0.999031		YDL088C	-0.358241	1.98611e-05	3.12837e-05		YDL088C	-0.353338	5.37421e-05	8.58895e-05		YDL088C	0.0961852	0.310146	0.722794		YDL088C	0.101088	0.181453	0.475852
YGL035C	0.0314166	0.786033	0.999031		YGL035C	-0.119695	0.139037	0.159613		YGL035C	-0.151112	0.0678225	0.0819563		YGL035C	-0.0665647	0.45708	0.813352		YGL035C	-0.0979814	0.181654	0.475852
YBR058C-A	0.0946631	0.570217	0.999031		YBR058C-A	-0.381189	0.00104628	0.00146571		YBR058C-A	-0.475853	6.82118e-05	0.00010806		YBR058C-A	-0.0429056	0.743615	0.933871		YBR058C-A	-0.137569	0.181349	0.475852
YCR027C	0.185391	0.476247	#N/A		YCR027C	1.00034	2.94786e-08	5.38997e-08		YCR027C	0.814947	1.39318e-05	2.32143e-05		YCR027C	-0.030173	0.882519	#N/A		YCR027C	-0.215564	0.181616	0.475852
YAR028W	0.150024	0.519482	0.999031		YAR028W	1.39335	8.10431e-18	2.17935e-17		YAR028W	1.24333	1.06511e-13	2.66715e-13		YAR028W	-0.0523298	0.767419	#N/A		YAR028W	-0.202354	0.181515	0.475852
YNL268W	0.0200918	0.833909	0.999031		YNL268W	-0.181745	0.00700858	0.00916166		YNL268W	-0.201836	0.00303878	0.00421713		YNL268W	-0.0661698	0.34954	0.754628		YNL268W	-0.0862616	0.181991	0.476494
YLR191W	0.0553207	0.772189	0.999031		YLR191W	0.6572	4.32034e-07	7.47885e-07		YLR191W	0.601879	1.71897e-05	2.84627e-05		YLR191W	0.213159	0.155395	0.549402		YLR191W	0.157838	0.182244	0.476919
YDL200C	0.314867	0.251792	#N/A		YDL200C	0.682752	0.000293993	0.000430174		YDL200C	0.367885	0.0656057	0.0794435		YDL200C	0.0963067	0.662154	#N/A		YDL200C	-0.218561	0.182724	0.477458
YPL239W	0.0821916	0.539153	0.999031		YPL239W	2.17476	3.31551e-119	5.52935e-118		YPL239W	2.09257	3.10669e-106	5.58336e-105		YPL239W	-0.0424404	0.657633	0.900048		YPL239W	-0.124632	0.182566	0.477458
[truncated: 3,788 more rows]

## Sheet: edc3 v WT all comp
gene_id	edc3_d TE Change (log2FoldChange)	pvalue	FDR (padj)		gene_id	edc3_d TE (log2FoldChange)	pvalue	FDR (padj)		gene_id	WT TE (log2FoldChange)	pvalue	FDR (padj)		gene_id	Ribo Change (log2FoldChange)	pvalue	FDR (padj)		gene_id	mRNA Change (log2FoldChange)	pvalue	FDR (padj)
YEL015W	-2.70237	0.0781115	0.929657		YEL015W	-2.50526	0.100031	0.139904		YEL015W	0.197114	0.275401	0.333611		YEL015W	-12.1307	7.19524e-17	2.08662e-13		YEL015W	-9.4283	8.18897e-83	4.7496e-79
YOL058W	-0.125168	0.570661	0.937938		YOL058W	0.403208	0.0111208	0.0195219		YOL058W	0.528376	0.000566966	0.00119675		YOL058W	-1.93191	5.52495e-34	3.20447e-30		YOL058W	-1.80675	3.96211e-32	1.14901e-28
YDR316W-A	0.8243	9.3763e-05	0.209159		YDR316W-A	-1.30827	3.11898e-18	3.7654e-17		YDR316W-A	-2.13257	5.7679e-47	1.95636e-45		YDR316W-A	-0.630906	4.47737e-05	0.00633383		YDR316W-A	-1.45521	4.05796e-24	7.84539e-21
YOR142W-A	0.800444	0.000200108	0.232126		YOR142W-A	-1.47862	4.82236e-22	7.39939e-21		YOR142W-A	-2.27906	2.40586e-51	9.06102e-50		YOR142W-A	-0.673052	1.83085e-05	0.00312322		YOR142W-A	-1.4735	1.32215e-23	1.91712e-20
YPR158W-A	0.801469	0.000317292	0.262899		YPR158W-A	-1.49508	3.66415e-21	5.27346e-20		YPR158W-A	-2.29655	8.50815e-49	2.99074e-47		YPR158W-A	-0.662517	4.41219e-05	0.00633383		YPR158W-A	-1.46399	7.69938e-22	8.93128e-19
YBR012W-A	0.84973	0.000287785	0.262899		YBR012W-A	-1.36198	2.80055e-16	2.90576e-15		YBR012W-A	-2.21171	5.31918e-41	1.59027e-39		YBR012W-A	-0.578464	0.000676073	0.0466812		YBR012W-A	-1.42819	7.63541e-19	7.3809e-16
YGR161C-C	0.650581	0.0053177	0.929657		YGR161C-C	-2.40416	2.62091e-47	1.05564e-45		YGR161C-C	-3.05474	1.00403e-77	7.56284e-76		YGR161C-C	-0.679146	8.11082e-05	0.00997924		YGR161C-C	-1.32973	3.03145e-17	2.51178e-14
YGR038C-A	0.613086	0.0101765	0.929657		YGR038C-A	-2.47161	8.01115e-48	3.27216e-46		YGR038C-A	-3.0847	6.01561e-76	4.20368e-74		YGR038C-A	-0.691718	8.6321e-05	0.0101513		YGR038C-A	-1.3048	5.01639e-16	3.63688e-13
YDR098C-A	0.580235	0.0167498	0.929657		YDR098C-A	-2.53426	1.48266e-48	6.32313e-47		YDR098C-A	-3.1145	5.13813e-75	3.50602e-73		YDR098C-A	-0.73871	3.68791e-05	0.00562892		YDR098C-A	-1.31895	7.67102e-16	4.94355e-13
YML045W-A	0.645648	0.00253754	0.929657		YML045W-A	-1.29278	1.66036e-17	1.88088e-16		YML045W-A	-1.93843	6.84805e-38	1.83883e-36		YML045W-A	-0.504188	0.00117595	0.0728222		YML045W-A	-1.14984	5.0989e-15	2.95736e-12
YDR210C-C	0.568108	0.0202132	0.929657		YDR210C-C	-3.00195	6.39345e-66	3.74566e-64		YDR210C-C	-3.57006	6.23451e-97	6.45718e-95		YDR210C-C	-0.674688	0.000255535	0.0242968		YDR210C-C	-1.2428	1.01209e-14	5.3365e-12
YER159C-A	0.655	0.0102354	0.929657		YER159C-A	-2.31616	2.81024e-37	7.9899e-36		YER159C-A	-2.97116	9.57711e-62	4.74763e-60		YER159C-A	-0.669029	0.000340439	0.0294709		YER159C-A	-1.32403	2.53587e-14	1.22567e-11
YCR012W	-0.42464	0.0707876	0.929657		YCR012W	0.459845	0.00565207	0.0105988		YCR012W	0.884485	1.02662e-07	3.72538e-07		YCR012W	0.824881	6.93521e-07	0.000191544		YCR012W	1.24952	5.48839e-14	2.44867e-11
YMR051C	0.550918	0.0406441	0.929657		YMR051C	-2.37428	3.07566e-35	8.29712e-34		YMR051C	-2.9252	4.35079e-54	1.71664e-52		YMR051C	-0.785836	6.33389e-05	0.00816368		YMR051C	-1.33675	3.64673e-13	1.51079e-10
YNL054W-A	0.544188	0.0177469	0.929657		YNL054W-A	-0.380751	0.019166	0.0321652		YNL054W-A	-0.924939	1.14529e-08	4.642e-08		YNL054W-A	-0.619104	0.000151772	0.0160051		YNL054W-A	-1.16329	5.27928e-13	2.04132e-10
YBR093C	-0.159256	0.520089	0.929657		YBR093C	0.388787	0.0269288	0.0438975		YBR093C	0.548042	0.0016788	0.0032274		YBR093C	-1.4141	9.37944e-16	1.81336e-12		YBR093C	-1.25485	5.78066e-13	2.09549e-10
YJR109C	-0.132405	0.478504	0.929657		YJR109C	-0.55862	2.55749e-05	7.4915e-05		YJR109C	-0.426215	0.0011912	0.00236608		YJR109C	-1.06061	2.08593e-15	3.0246e-12		YJR109C	-0.928208	1.15966e-12	3.9565e-10
YPR158C-C	0.789136	0.0202256	0.929657		YPR158C-C	-1.76594	2.46994e-13	1.9152e-12		YPR158C-C	-2.55507	1.33888e-26	2.28396e-25		YPR158C-C	-0.876886	0.000321366	0.0282413		YPR158C-C	-1.66602	1.98089e-12	6.38287e-10
YJL088W	-0.0116122	0.966094	0.99232		YJL088W	0.58065	0.00316662	0.00628771		YJL088W	0.592262	0.00177576	0.00339915		YJL088W	-1.28646	8.83191e-11	6.40314e-08		YJL088W	-1.27485	1.14281e-11	3.48857e-09
YNL284C-A	0.533896	0.0333182	0.929657		YNL284C-A	0.0358059	0.84028	0.869669		YNL284C-A	-0.49809	0.00491828	0.00871822		YNL284C-A	-0.621131	0.000501051	0.0387479		YNL284C-A	-1.15503	5.68589e-11	1.64891e-08
YCR011C	0.0606294	0.781229	0.963577		YCR011C	-0.338422	0.026483	0.0432436		YCR011C	-0.399052	0.010632	0.0176895		YCR011C	1.02913	6.94153e-11	5.75156e-08		YCR011C	0.968496	1.36717e-10	3.77598e-08
YHR214C-C	0.537658	0.0266251	0.929657		YHR214C-C	-1.81865	3.88318e-26	7.40869e-25		YHR214C-C	-2.3563	3.38409e-43	1.10268e-41		YHR214C-C	-0.519637	0.00300286	0.155505		YHR214C-C	-1.0573	2.94636e-10	7.76768e-08
YOL151W	-0.277282	0.234575	0.929657		YOL151W	0.32268	0.0472888	0.0723847		YOL151W	0.599962	0.000332893	0.000733022		YOL151W	0.734326	1.36895e-05	0.0027379		YOL151W	1.01161	3.26987e-10	8.24576e-08
YGR027W-A	0.308373	0.152058	0.929657		YGR027W-A	-2.04012	7.97057e-41	2.59715e-39		YGR027W-A	-2.34849	7.44348e-54	2.91704e-52		YGR027W-A	-0.628942	4.26404e-05	0.00633383		YGR027W-A	-0.937315	5.09881e-10	1.23221e-07
YOL152W	-0.0277585	0.934523	0.990701		YOL152W	-0.237098	0.325709	0.394799		YOL152W	-0.20934	0.376191	0.438927		YOL152W	-1.48204	1.03548e-09	4.61982e-07		YOL152W	-1.45428	6.03876e-10	1.40099e-07
YJR028W	0.326976	0.129585	0.929657		YJR028W	-1.95371	1.85892e-37	5.33748e-36		YJR028W	-2.28069	1.10908e-50	4.09724e-49		YJR028W	-0.599084	9.89192e-05	0.0108506		YJR028W	-0.926061	9.04572e-10	2.01789e-07
YCR009C	-0.181618	0.509113	0.929657		YCR009C	0.851054	1.06941e-05	3.301e-05		YCR009C	1.03267	1.31833e-07	4.72286e-07		YCR009C	0.992315	4.05518e-07	0.00012379		YCR009C	1.17393	1.22041e-09	2.52799e-07
YAR010C	0.316545	0.14421	0.929657		YAR010C	-2.11247	4.36959e-43	1.53598e-41		YAR010C	-2.42902	1.0034e-56	4.31089e-55		YAR010C	-0.606581	8.85314e-05	0.0101513		YAR010C	-0.923126	1.19417e-09	2.52799e-07
YPR137C-A	0.317993	0.143379	0.929657		YPR137C-A	-2.10389	1.50271e-42	5.219e-41		YPR137C-A	-2.42189	3.95759e-56	1.67548e-54		YPR137C-A	-0.603775	9.91525e-05	0.0108506		YPR137C-A	-0.921768	1.39317e-09	2.78634e-07
YFR055W	-0.0993204	0.65855	0.95322		YFR055W	0.41156	0.010104	0.0179599		YFR055W	0.510881	0.00120887	0.00239544		YFR055W	-1.0312	1.53727e-10	8.59786e-08		YFR055W	-0.93188	2.75137e-09	5.31931e-07
YCR017C	0.0785848	0.699526	0.962589		YCR017C	-1.00654	1.6259e-12	1.17291e-11		YCR017C	-1.08512	8.54951e-14	6.04721e-13		YCR017C	0.912356	5.83605e-10	2.82076e-07		YCR017C	0.833771	3.01998e-09	5.65028e-07
YCL030C	-0.111272	0.677494	0.95889		YCL030C	0.169451	0.372816	0.443101		YCL030C	0.280723	0.135882	0.178347		YCL030C	-1.22042	1.63063e-10	8.59786e-08		YCL030C	-1.10915	3.28003e-09	5.94505e-07
YER081W	-0.0979438	0.718596	0.963251		YER081W	-0.0975751	0.616811	0.676149		YER081W	0.000368692	0.998446	0.998791		YER081W	-1.15374	5.70797e-09	2.36473e-06		YER081W	-1.0558	1.41353e-08	2.48439e-06
YLR227W-B	0.603124	0.0514006	0.929657		YLR227W-B	-4.04243	6.19479e-76	4.6662e-74		YLR227W-B	-4.64555	3.31899e-100	3.6321e-98		YLR227W-B	-0.601647	0.00647736	0.293505		YLR227W-B	-1.20477	2.75421e-08	4.69836e-06
YOR049C	-0.118509	0.80015	0.967767		YOR049C	-0.378133	0.215141	0.275761		YOR049C	-0.259624	0.464684	0.526605		YOR049C	1.47796	4.8862e-05	0.00674761		YOR049C	1.59647	5.89004e-08	9.76064e-06
YNL142W	-0.518879	0.136477	0.929657		YNL142W	-1.00122	6.56135e-05	0.000178982		YNL142W	-0.482345	0.0461483	0.0678824		YNL142W	-1.81272	8.60566e-13	9.98256e-10		YNL142W	-1.29384	6.26298e-08	1.00904e-05
YDL181W	-0.649532	0.087262	0.929657		YDL181W	1.32027	6.57921e-07	2.42436e-06		YDL181W	1.9698	4.14644e-13	2.78027e-12		YDL181W	0.786234	0.00361004	0.180502		YDL181W	1.43577	7.56936e-08	1.18655e-05
YOL103W-A	0.21392	0.352814	0.929657		YOL103W-A	-3.88908	1.12798e-124	2.51626e-122		YOL103W-A	-4.103	8.33111e-142	2.68447e-139		YOL103W-A	-0.625283	0.000216413	0.0209199		YOL103W-A	-0.839204	7.92561e-08	1.19813e-05
YAR071W	-0.177979	0.392762	0.929657		YAR071W	0.670927	5.38378e-06	1.72901e-05		YAR071W	0.848905	7.76623e-09	3.22204e-08		YAR071W	-0.965821	6.17264e-11	5.75156e-08		YAR071W	-0.787843	8.05639e-08	1.19813e-05
YLR256W-A	0.255711	0.268065	0.929657		YLR256W-A	-3.81697	1.11202e-119	2.22405e-117		YLR256W-A	-4.07268	9.2873e-139	2.44847e-136		YLR256W-A	-0.580963	0.000600424	0.0449336		YLR256W-A	-0.836675	9.83043e-08	1.42541e-05
YDR381W	-1.20863	0.000144248	0.209159		YDR381W	0.158625	0.48026	0.549627		YDR381W	1.36725	1.22607e-09	5.63936e-09		YDR381W	-0.0178864	0.936712	1		YDR381W	1.19074	1.12604e-07	1.59293e-05	YRA1
YGR027W-B	0.498141	0.093989	0.929657		YGR027W-B	-2.91925	9.45874e-44	3.4075e-42		YGR027W-B	-3.41739	1.96883e-59	8.99149e-58		YGR027W-B	-0.610813	0.00381865	0.1893		YGR027W-B	-1.10895	1.20076e-07	1.65819e-05
YLR227W-A	0.238583	0.304572	0.929657		YLR227W-A	-3.89192	1.05514e-122	2.26661e-120		YLR227W-A	-4.13051	6.04338e-141	1.75258e-138		YLR227W-A	-0.594571	0.000490156	0.0384176		YLR227W-A	-0.833155	1.30186e-07	1.75599e-05
YML040W	0.181756	0.434277	0.929657		YML040W	-3.93349	5.02437e-125	1.16565e-122		YML040W	-4.11524	4.71503e-140	1.30225e-137		YML040W	-0.65045	0.000138171	0.0148405		YML040W	-0.832207	1.34467e-07	1.77253e-05
YDR261C-C	0.247857	0.292825	0.929657		YDR261C-C	-4.19353	3.0142e-138	9.20124e-136		YDR261C-C	-4.44138	2.4223e-158	1.40493e-155		YDR261C-C	-0.588144	0.000692505	0.0472533		YDR261C-C	-0.836002	1.61182e-07	2.07746e-05
YDR365W-A	0.262045	0.257495	0.929657		YDR365W-A	-3.93591	1.41743e-126	3.42545e-124		YDR365W-A	-4.19795	1.3424e-146	4.57994e-144		YDR365W-A	-0.557133	0.00104704	0.0671336		YDR365W-A	-0.819178	1.82398e-07	2.2998e-05
YER137C-A	0.226245	0.334633	0.929657		YER137C-A	-4.09049	6.35466e-133	1.84285e-130		YER137C-A	-4.31673	4.62031e-151	2.06137e-148		YER137C-A	-0.60119	0.000478296	0.0380016		YER137C-A	-0.827435	2.03511e-07	2.51141e-05
YLR092W	0.131356	0.688877	0.960689		YLR092W	-0.577448	0.0158205	0.0269879		YLR092W	-0.708804	0.00158741	0.00307002		YLR092W	-0.94031	0.000201002	0.0197596		YLR092W	-1.07167	2.92054e-07	3.52898e-05
YPR158W-B	0.67099	0.041119	0.929657		YPR158W-B	-3.65789	9.22467e-56	4.53416e-54		YPR158W-B	-4.32888	1.24999e-77	9.29476e-76		YPR158W-B	-0.507027	0.0303755	0.746516		YPR158W-B	-1.17802	3.186e-07	3.77118e-05
YJR137C	-0.0900475	0.685688	0.960063		YJR137C	-0.112629	0.475338	0.544639		YJR137C	-0.0225815	0.885542	0.908087		YJR137C	-0.886082	2.32968e-08	9.00811e-06		YJR137C	-0.796035	3.35147e-07	3.8877e-05
YOR142W-B	0.67537	0.0541367	0.929657		YOR142W-B	-3.55885	1.29967e-46	5.09328e-45		YOR142W-B	-4.23422	1.70453e-65	9.23952e-64		YOR142W-B	-0.576304	0.021075	0.617348		YOR142W-B	-1.25168	3.66166e-07	4.16424e-05
YCR018C	-0.0497316	0.896331	0.983908		YCR018C	0.535801	0.0361312	0.05707		YCR018C	0.585533	0.0387948	0.0579475		YCR018C	1.23407	1.60739e-05	0.00291339		YCR018C	1.2838	3.74206e-07	4.17384e-05
YBR012W-B	0.751974	0.0296089	0.929657		YBR012W-B	-3.18999	7.24872e-39	2.17837e-37		YBR012W-B	-3.94197	1.35248e-58	6.08091e-57		YBR012W-B	-0.47874	0.0519011	0.984492		YBR012W-B	-1.23072	3.91319e-07	4.28236e-05
YOR348C	-0.127759	0.699693	0.962589		YOR348C	0.34188	0.136953	0.185071		YOR348C	0.469639	0.0488848	0.0715266		YOR348C	1.01909	2.23798e-05	0.00360564		YOR348C	1.14685	4.82859e-07	5.09197e-05
YPL257W-A	0.295467	0.216354	0.929657		YPL257W-A	-3.88835	3.49838e-116	6.34081e-114		YPL257W-A	-4.18382	1.9289e-136	4.86418e-134		YPL257W-A	-0.523723	0.00276841	0.146719		YPL257W-A	-0.819191	4.81612e-07	5.09197e-05
[truncated: 5,745 more rows]

## Sheet: scd6edc3 v WT all comp
gene_id	edc3scd6_dd TE Change (log2FoldChange)	pvalue	FDR (padj)		gene_id	edc3scd6_dd TE (log2FoldChange)	pvalue	FDR (padj)		gene_id	WT TE (log2FoldChange)	pvalue	FDR (padj)		gene_id	Ribo Change (log2FoldChange)	pvalue	FDR (padj)		gene_id	mRNA Change (log2FoldChange)	pvalue	FDR (padj)
[truncated: 5,835 more rows]

[truncated: 14 more sheets: dhh1 v WT all comp, pat1 v WT all comp, pat1dhh1 v WT all comp, dcp2 v WT all comp, Gene groups_mRNA analysis, Gene groups_TE analysis, Gene groups_RPF analysis, Pathway gene groups, Codon Opt Scores nonESR mRNAs, Codon Protection Indices, Capped toTotal RNA ratios_s6,e3, Capped to Total RNA ratios_dhh1, Dhh1 occ enrich scores, IGV tracks]
